# Supplementary material for: The interaction of InvF-RNAP is mediated by the chaperone SicA in Salmonella sp: an in silico prediction
Source: PeerJ. 2024 Mar 25;12:e17069. doi: 10.7717/peerj.17069 (PMC10977090; doi:10.7717/peerj.17069)
Supplement: Supplemental Information 2 — All the results obtained from molecular dynamics simulations and PBSA. [file peerj-12-17069-s002.xlsx]

## Sheet: InvF-RpoA
Protein	#Residues	MM_Energy(+/-)dev/error												Polar_Energy(+/-)dev/error												Apolar_Energy(+/-)dev/error												Total_Energy(+/-)dev/error
		Frame1		Frame2		Frame3		Frame4		Frame5		Med		Frame1		Frame2		Frame3		Frame4		Frame5		Med		Frame1		Frame2		Frame3		Frame4		Frame5		Med		Frame1		Frame2		Frame3		Frame4		Frame5		Med
InvF	MET-1	-66.9843	0.4701	-70.4198	0.2309	-66.4525	0.5934	-63.748	0.3051	-61.8277	0.3137	-65.8865		10.5771	0.2793	13.154	0.1674	3.8511	0.2242	3.5113	0.1303	1.574	0.1358	6.5335		0.0016	0.0101	0.0166	0.0087	-0.0294	0.0114	-0.0023	0.0129	0.0087	0.0155	-0.00096		-56.4204	0.2349	-57.2453	0.1397	-62.6239	0.4759	-60.2393	0.257	-60.2454	0.2823	-59.3549
	LEU-2	0.249	0.0586	0.5159	0.0634	0.0836	0.0392	0.2869	0.0284	-0.4628	0.0161	0.13452		0.429	0.0196	0.4668	0.0201	0.0646	0.0274	0.1077	0.0173	-0.065	0.0101	0.20062		-0.0001	0.0127	-0.0261	0.0129	0.0118	0.0071	0.0098	0.0094	-0.0003	0.0101	-0.00098		0.6756	0.0558	0.959	0.0588	0.1595	0.0431	0.406	0.0362	-0.5265	0.02	0.33472
	ASN-3	-3.4949	0.0492	-3.8876	0.0561	-0.969	0.1326	-2.4246	0.1329	0.239	0.0735	-2.10742		0.9486	0.0536	1.4626	0.0456	0.3971	0.0593	0.4775	0.0594	-0.3779	0.073	0.58158		-0.0037	0.0048	-0.0009	0.0046	-0.0044	0.0091	-0.0103	0.0083	-0.0015	0.0113	-0.00416		-2.5484	0.0637	-2.4258	0.0681	-0.5851	0.1208	-1.9558	0.1378	-0.1396	0.1055	-1.53094
	THR-4	-0.0505	0.0221	-0.1478	0.0235	1.043	0.0257	1.1468	0.0312	0.1367	0.0195	0.42564		-0.2012	0.0352	-0.1171	0.0409	-0.121	0.033	-0.0903	0.0325	-0.1741	0.0397	-0.14074		-0.008	0.0086	0.0023	0.0069	0.0001	0.0035	0.0014	0.0063	-0.0026	0.0104	-0.00136		-0.262	0.0388	-0.263	0.0452	0.923	0.0381	1.0552	0.0428	-0.0401	0.0431	0.28262
	GLN-5	0.0681	0.0153	-0.0868	0.0196	-0.4251	0.0384	0.0941	0.0232	-0.5071	0.0366	-0.17136		-0.2396	0.0428	-0.14	0.0452	-0.0636	0.0573	0.0378	0.0624	-0.1041	0.0704	-0.1019		-0.0087	0.0104	-0.0295	0.0126	0.0017	0.0046	-0.0117	0.01	-0.0152	0.0148	-0.01268		-0.1824	0.0436	-0.2567	0.0475	-0.4861	0.0625	0.1179	0.0654	-0.6259	0.0774	-0.28664
	GLU-6	45.8505	0.2688	47.4919	0.2562	50.0131	0.3007	55.1017	0.2969	58.8666	0.3021	51.4648		-0.8489	0.1071	-0.9959	0.1048	-0.7573	0.0904	-1.0224	0.1076	-1.5903	0.1063	-1.04296		0.0002	0.0116	-0.0104	0.0095	-0.0027	0.0065	0.0201	0.0086	-0.0094	0.0119	-0.00044		44.9864	0.27	46.4995	0.2774	49.2399	0.3006	54.1002	0.2901	57.2832	0.2925	50.4218
	VAL-7	0.178	0.0158	0.1587	0.0211	0.7537	0.0172	0.6521	0.0239	0.876	0.0243	0.5237		0.0239	0.0211	0.0908	0.0221	0.0273	0.0209	-0.0222	0.0222	-0.048	0.0362	0.01436		0.0021	0.0075	-0.005	0.0084	-0.005	0.008	-0.013	0.0085	-0.0167	0.0141	-0.00752		0.2058	0.028	0.2451	0.0292	0.7759	0.0266	0.6159	0.0319	0.8112	0.0362	0.53078
	LEU-8	-0.3786	0.0152	-0.3474	0.0161	-0.7477	0.01	-0.7243	0.0131	-0.6555	0.013	-0.5707		0.0073	0.0046	0.0192	0.0061	0.0743	0.0083	0.0601	0.0088	0.063	0.0078	0.04478		0.0188	0.0137	-0.0147	0.0125	-0.0036	0.0125	0.0211	0.0149	-0.0246	0.0129	-0.0006		-0.3519	0.0192	-0.3424	0.0195	-0.6769	0.0174	-0.6423	0.0206	-0.6178	0.0176	-0.52626
	LYS-9	-40.7676	0.1503	-39.5185	0.144	-53.6338	0.4368	-48.2232	0.4605	-49.6985	0.3707	-46.3683		-0.067	0.1218	0.3643	0.1098	0.1113	0.109	0.2607	0.1077	-0.05	0.1335	0.12386		-0.0024	0.0076	0.0067	0.0089	-0.0113	0.0086	-0.0035	0.01	-0.012	0.0114	-0.0045		-40.8351	0.1993	-39.1509	0.1792	-53.5225	0.4282	-47.9546	0.4784	-49.7669	0.413	-46.246
	GLU-10	45.4841	0.1492	46.4908	0.1646	43.2008	0.1393	44.272	0.1208	49.3025	0.2491	45.75		-1.0494	0.0952	-0.726	0.1035	-0.4797	0.09	-0.4754	0.1013	-0.8873	0.1347	-0.72356		-0.0067	0.0065	-0.0044	0.0088	-0.0085	0.005	0.0022	0.0064	0.0299	0.0112	0.0025		44.4273	0.1787	45.7607	0.1853	42.7115	0.1672	43.7997	0.1504	48.4606	0.2732	45.032
	GLY-11	-0.1642	0.0215	-0.2366	0.0237	1.3457	0.0279	0.6956	0.0392	2.5343	0.0356	0.83496		-0.0326	0.0201	0.0794	0.0267	-0.1708	0.0173	-0.1009	0.0208	-0.1304	0.0293	-0.07106		-0.0105	0.0043	0.0053	0.0051	0.0003	0.0024	0.0029	0.0054	0.0079	0.0057	0.00118		-0.208	0.0258	-0.15	0.0307	1.1754	0.0308	0.5954	0.0458	2.4156	0.0374	0.76568
	GLU-12	71.7965	0.5648	68.7946	0.3529	66.0232	0.4305	72.8613	0.5006	70.4465	0.6027	69.9844		-2.0193	0.1646	-2.5016	0.1267	-1.3415	0.1126	-2.1315	0.1611	-2.5724	0.1541	-2.11326		-0.002	0.0063	-0.0083	0.0065	0.0012	0.0066	-0.0007	0.0092	-0.0039	0.0096	-0.00274		69.7473	0.5682	66.2667	0.3586	64.6766	0.3951	70.7435	0.4453	67.8542	0.5563	67.8577
	LYS-13	-72.3991	0.3535	-72.361	0.5881	-65.0432	0.281	-72.0792	0.5365	-81.456	0.7565	-72.6677		3.897	0.1719	3.7311	0.2128	2.4968	0.1123	3.7288	0.1692	1.5847	0.2978	3.08768		-0.0055	0.011	0	0.0111	0.0011	0.0044	-0.0673	0.0117	0.0087	0.0133	-0.0126		-68.5154	0.3859	-68.6402	0.5663	-62.5344	0.2904	-68.4049	0.4718	-79.8519	0.6754	-69.5894
	ARG-14	-73.9871	0.5207	-72.9171	0.376	-69.5804	0.553	-72.7107	0.4081	-79.4109	0.9676	-73.7212		2.2344	0.1397	3.6405	0.1463	3.8668	0.1558	2.7027	0.1208	3.977	0.3005	3.28428		0.0011	0.0083	-0.0044	0.01	-0.0072	0.0085	0.0196	0.011	-0.0113	0.0122	-0.00044		-71.7561	0.4766	-69.2896	0.3361	-65.7022	0.4322	-69.9751	0.349	-75.4226	0.7427	-70.4291
	LYS-15	-138.466	3.0403	-130.256	1.4725	-114.801	1.0458	-135.775	1.1906	-205.895	1.9066	-145.039		47.7835	3.6894	40.0803	1.6453	22.8443	0.8975	38.6582	1.4959	122.302	2.6535	54.3336		-1.1595	0.0332	-1.0349	0.0201	-1.0565	0.0175	-1.055	0.0233	-1.5748	0.0279	-1.17614		-91.7661	1.1415	-91.2474	0.6912	-92.9961	0.4852	-98.1863	0.604	-85.1532	1.0069	-91.8698
	ILE-16	-5.6798	0.1473	-12.463	0.1641	-6.2881	0.0789	-5.5211	0.1041	-2.1322	0.0608	-6.41684		2.0556	0.1106	5.7691	0.0974	2.7145	0.0775	1.7126	0.067	0.7244	0.0399	2.59524		-0.1114	0.0119	-0.2103	0.0126	-0.0415	0.0125	-0.0043	0.0098	0.0074	0.0072	-0.07202		-3.7376	0.0742	-6.9089	0.1138	-3.6132	0.0489	-3.819	0.057	-1.4002	0.0435	-3.89578
	ARG-17	-173.964	1.8128	-187.672	0.8801	-225.253	0.6095	-200.053	1.3415	-172.097	2.2054	-191.808		73.52	1.7479	89.5949	0.8846	145.385	0.8801	101.586	1.5345	71.1244	2.3837	96.242		-1.3023	0.0297	-1.5317	0.024	-2.4193	0.0218	-1.9598	0.0329	-1.1626	0.0378	-1.67514		-101.698	0.5816	-99.607	0.5031	-82.2871	0.6163	-100.428	0.5958	-102.058	0.527	-97.2155
	SER-18	-1.8773	0.062	-2.245	0.0632	-1.7743	0.0451	-1.4661	0.065	0.4521	0.1061	-1.38212		0.2641	0.0509	0.8064	0.0567	0.4553	0.0384	0.1408	0.044	-0.2243	0.0483	0.28846		0.0067	0.0068	0.0074	0.0059	0.0043	0.0041	-0.0166	0.0058	0.0036	0.0086	0.00108		-1.6045	0.0586	-1.431	0.0476	-1.3124	0.0396	-1.3433	0.0453	0.235	0.0975	-1.09124
	PRO-19	-1.5638	0.0237	-1.5234	0.0255	-1.6871	0.0267	-2.282	0.0312	-1.9364	0.0171	-1.79854		0.7606	0.0155	0.8148	0.014	0.3222	0.0205	0.642	0.0207	0.2794	0.0113	0.5638		0.001	0.0115	0.0077	0.0114	-0.0093	0.0074	-0.0042	0.0077	0	0.0084	-0.00096		-0.8008	0.0232	-0.7022	0.0193	-1.3734	0.0204	-1.6438	0.0192	-1.6574	0.0158	-1.23552
	GLU-20	67.0318	0.4077	70.8402	0.2493	69.9623	0.3022	71.0786	0.271	60.5788	0.2541	67.8983		-9.3023	0.2337	-11.3142	0.1423	-8.3191	0.148	-6.6523	0.1589	-3.0193	0.1501	-7.72144		-0.0116	0.0084	0.013	0.0058	0.0129	0.0103	-0.0017	0.0068	0.0066	0.0115	0.00384		57.7153	0.2309	59.5434	0.1661	61.6561	0.227	64.4291	0.1821	57.5695	0.2359	60.1827
	ALA-21	-0.7621	0.0105	-0.8455	0.0118	-0.0541	0.018	-0.1365	0.0233	-0.2979	0.0142	-0.41922		0.1668	0.0066	0.2524	0.0078	0.0181	0.0135	0.0472	0.0068	0.0644	0.0068	0.10978		0.0035	0.0057	0.0051	0.0056	0.016	0.0098	0.0067	0.0116	0.031	0.0119	0.01246		-0.5914	0.0114	-0.5882	0.0131	-0.0203	0.0227	-0.0832	0.023	-0.2026	0.0193	-0.29714
	TRP-22	-0.5891	0.0341	-1.0099	0.0464	-2.8715	0.0221	-2.393	0.0524	-1.1974	0.0316	-1.61218		-0.3971	0.0194	-0.1419	0.0239	0.8233	0.0172	0.4424	0.0282	0.0554	0.0167	0.15642		0.0016	0.0103	-0.0032	0.0104	-0.0118	0.0066	0.0178	0.0098	0.0297	0.0095	0.00682		-0.9842	0.0356	-1.1559	0.0355	-2.0595	0.0255	-1.9324	0.0441	-1.1117	0.0314	-1.44874
	PHE-23	-0.2083	0.0144	-0.1252	0.0159	0.4279	0.0134	0.1895	0.0207	0.125	0.016	0.08178		0.1454	0.0048	0.1103	0.005	-0.0523	0.0041	-0.0031	0.0052	0.0035	0.0066	0.04076		0.0165	0.0104	-0.004	0.0086	0.0008	0.0081	0.0153	0.0108	-0.0163	0.0133	0.00246		-0.0455	0.0155	-0.0198	0.0153	0.3766	0.0145	0.2027	0.0205	0.1132	0.0212	0.12544
	ILE-24	-0.5936	0.0107	-0.6618	0.0121	-0.3021	0.0084	-0.4967	0.0104	-0.5071	0.0113	-0.51226		0.1528	0.0048	0.1734	0.0051	0.0332	0.003	0.0636	0.0032	0.0608	0.0027	0.09676		0.0073	0.0094	-0.0068	0.0143	-0.0226	0.0104	0.0039	0.0114	0.0033	0.014	-0.00298		-0.4336	0.0117	-0.496	0.017	-0.2917	0.0137	-0.4292	0.0141	-0.4437	0.0184	-0.41884
	GLN-25	1.1674	0.0164	1.2135	0.0144	0.9595	0.017	1.0501	0.0215	1.0337	0.0218	1.08484		-0.3277	0.0393	-0.2371	0.0396	-0.0509	0.0375	-0.185	0.0423	-0.2415	0.0599	-0.20844		-0.0129	0.0092	-0.0006	0.0094	0.013	0.0072	0.0006	0.0103	-0.0049	0.0106	-0.00096		0.8278	0.0418	0.9756	0.0432	0.921	0.0392	0.8649	0.0468	0.7881	0.0631	0.87548
	THR-26	-0.0437	0.0138	-0.1311	0.0219	-0.4444	0.0238	-0.4367	0.0293	0.0192	0.0138	-0.20734		0.015	0.0311	-0.0347	0.0322	0.0816	0.0205	0.0576	0.0206	0.0324	0.0234	0.03038		0.0171	0.0087	0.0005	0.0117	-0.0076	0.0118	0.0058	0.0118	-0.0146	0.0114	0.00024		-0.0119	0.0361	-0.1658	0.0353	-0.37	0.0318	-0.3733	0.0339	0.0358	0.0283	-0.17704
	CYS-27	-0.5544	0.0219	-0.6915	0.0196	-0.678	0.0177	-0.7259	0.0193	-0.752	0.0159	-0.68036		0.0676	0.0261	0.1657	0.0297	0.0496	0.0212	0.0764	0.0222	0.0345	0.0267	0.07876		0.0081	0.0076	0.0025	0.0067	0.0044	0.0063	-0.0017	0.006	-0.0229	0.0088	-0.00192		-0.4775	0.0329	-0.522	0.0327	-0.6232	0.0268	-0.6514	0.0289	-0.7405	0.0296	-0.60292
	SER-28	-0.2864	0.0159	0.031	0.0181	-0.1564	0.0142	0.022	0.0133	-0.1785	0.0209	-0.11366		0.0389	0.0423	-0.0003	0.0303	0.0206	0.0317	-0.0493	0.0356	-0.0338	0.0438	-0.00478		-0.0104	0.0071	0.0112	0.0069	0.0003	0.0087	-0.0029	0.0084	-0.0095	0.0058	-0.00226		-0.2541	0.0452	0.039	0.0361	-0.1364	0.0341	-0.0304	0.0378	-0.2222	0.044	-0.12082
	ALA-29	0.0239	0.011	-0.1067	0.0122	-0.1725	0.006	-0.1784	0.0045	-0.0502	0.0115	-0.09678		-0.0327	0.0229	-0.0178	0.025	0.0503	0.0245	0.0203	0.0275	-0.1044	0.0369	-0.01686		0.0023	0.0045	-0.0011	0.0039	0.0013	0.0022	-0.0011	0.0038	-0.0119	0.0066	-0.0021		-0.0058	0.0262	-0.1263	0.0279	-0.1224	0.0248	-0.16	0.027	-0.1662	0.0382	-0.11614
	GLN-30	0.5103	0.0423	0.0321	0.0394	-0.5215	0.0183	-0.4392	0.0256	0.4156	0.0486	-0.00054		-0.114	0.0532	0.014	0.0465	0.0694	0.0357	0.0133	0.0371	-0.2756	0.0631	-0.05858		0.0071	0.0113	-0.0019	0.0119	0.0131	0.0092	-0.0116	0.0102	0.0033	0.0097	0.002		0.4056	0.0646	0.0442	0.0558	-0.436	0.0403	-0.4369	0.0462	0.1426	0.078	-0.0561
	LYS-31	-34.9126	0.162	-34.4896	0.1779	-30.968	0.1337	-31.374	0.105	-34.2417	0.1511	-33.1972		0.6939	0.1067	0.5053	0.1159	0.0249	0.0989	0.2149	0.1089	0.0346	0.1291	0.29472		-0.0143	0.012	0.0021	0.0105	0.0115	0.008	0.0024	0.0114	-0.0083	0.0141	-0.00132		-34.2481	0.1771	-33.9781	0.201	-30.9304	0.1673	-31.1563	0.1576	-34.2097	0.1748	-32.9045
	LEU-32	0.1614	0.0131	0.2247	0.0132	0.204	0.0096	0.2661	0.0121	0.1771	0.015	0.20666		-0.0816	0.0071	-0.0667	0.0068	-0.0165	0.004	-0.0679	0.0048	-0.0418	0.0094	-0.0549		0.0099	0.0108	-0.0133	0.0129	-0.0046	0.0089	-0.0017	0.0111	0.0352	0.0125	0.0051		0.0903	0.014	0.1461	0.0183	0.1826	0.0135	0.197	0.0151	0.17	0.021	0.1572
	HIS-33	-0.7055	0.0883	-0.8612	0.0685	0.914	0.0444	-0.7564	0.0504	-0.9164	0.0408	-0.4651		-0.1612	0.048	-0.1692	0.0392	-0.0609	0.0461	0.0369	0.0422	-0.292	0.0574	-0.12928		0.0136	0.0065	0.0033	0.0061	0.0027	0.0071	-0.009	0.0062	0.0026	0.0098	0.00264		-0.8596	0.0909	-1.029	0.0758	0.8556	0.0595	-0.7281	0.0547	-1.2032	0.0728	-0.59286
	MET-34	0.7045	0.0439	0.3422	0.0435	0.8599	0.0206	0.2722	0.0483	0.3948	0.0574	0.51472		-0.0548	0.0159	-0.0085	0.014	-0.1322	0.0056	-0.066	0.0108	-0.0585	0.013	-0.064		0.0013	0.0091	-0.0056	0.0133	-0.0135	0.0125	-0.013	0.011	-0.0038	0.0151	-0.00692		0.6525	0.0342	0.3299	0.0358	0.7129	0.0208	0.1938	0.0416	0.3331	0.0514	0.44444
	SER-35	1.6573	0.0423	1.9574	0.0465	1.8358	0.0183	1.4147	0.0573	1.784	0.0638	1.72984		-0.3235	0.0212	-0.5572	0.0242	-0.3186	0.0201	-0.1877	0.0256	-0.377	0.0387	-0.3528		-0.0023	0.0094	0.0059	0.0084	-0.0018	0.0036	-0.0048	0.0065	-0.0201	0.0095	-0.00462		1.3303	0.0412	1.4068	0.048	1.5157	0.0246	1.2252	0.0557	1.3856	0.069	1.37272
	PHE-36	-1.0013	0.044	-0.386	0.0437	0.7692	0.0232	0.5836	0.0279	0.7562	0.0322	0.14434		0.3127	0.0239	0.4005	0.0265	-0.0745	0.0211	0.0277	0.0321	-0.1478	0.0393	0.10372		0.024	0.0164	0.0208	0.0162	0.0096	0.0091	0.0048	0.0106	0.005	0.0146	0.01284		-0.664	0.0411	0.0347	0.0472	0.705	0.0304	0.6163	0.0391	0.6101	0.0488	0.26042
	SER-37	-3.3699	0.1516	-3.4345	0.105	-0.7602	0.0699	-1.4821	0.0712	-0.7464	0.1062	-1.95862		3.9622	0.2052	5.0568	0.1404	1.7507	0.0884	1.167	0.1136	1.2029	0.0963	2.62792		-0.519	0.0237	-0.5565	0.0177	-0.2434	0.011	-0.2247	0.0139	-0.2222	0.0107	-0.35316		0.0778	0.1624	1.0695	0.1345	0.7426	0.0989	-0.5298	0.1177	0.2349	0.1447	0.319
	GLU-38	106.217	0.533	106.615	0.3831	87.9013	0.3466	92.4735	0.4317	84.9553	0.4254	95.6325		-26.2353	0.6091	-29.3689	0.3559	-14.9314	0.3205	-16.4659	0.3816	-9.2382	0.2915	-19.2479		-0.2226	0.0122	-0.2887	0.0115	-0.3825	0.0138	-0.451	0.012	-0.4581	0.0123	-0.36058		79.7726	0.3214	76.978	0.3115	72.5993	0.2754	75.5617	0.3636	75.2537	0.3093	76.0331
	SER-39	-3.5742	0.0928	-5.2844	0.0902	-1.2589	0.0782	-3.7681	0.0804	-4.0391	0.0937	-3.58494		0.2753	0.0987	2.4124	0.1108	-0.2552	0.0971	-1.1281	0.071	0.1269	0.079	0.28626		-0.0395	0.0087	-0.0763	0.0104	-0.053	0.0073	-0.0084	0.0055	-0.0555	0.0123	-0.04654		-3.3438	0.0709	-2.9579	0.0949	-1.564	0.0867	-4.9048	0.0753	-3.9684	0.0926	-3.34778
	ARG-40	-188.059	0.8227	-185.217	0.7755	-133.054	1.1464	-135.554	0.4819	-142.07	0.6658	-156.791		119.31	0.9016	121.609	0.7369	82.5699	1.483	75.1481	0.4827	74.0899	0.6837	94.5452		-4.2494	0.0257	-4.659	0.0234	-3.3259	0.0478	-3.456	0.026	-3.7974	0.0264	-3.89754		-73.0494	0.4824	-68.2507	0.5292	-53.8438	0.5588	-63.8806	0.4108	-71.7935	0.5279	-66.1636
	HIS-41	-4.2907	0.2832	-9.5298	0.2774	-0.5017	0.0851	-3.3183	0.2025	-8.526	0.4011	-5.2333		3.7204	0.3785	7.4428	0.3389	-0.9939	0.0887	0.4691	0.1735	6.0202	0.4568	3.33172		-0.2647	0.0212	-0.5253	0.0255	-0.0103	0.0081	-0.1735	0.0213	-0.4657	0.0258	-0.2879		-0.8515	0.1485	-2.6356	0.2207	-1.5045	0.1208	-3.0435	0.1427	-2.9962	0.2968	-2.20626
	ASN-42	-1.1321	0.22	-1.9646	0.4979	0.2619	0.0852	0.9935	0.078	-0.1064	0.1874	-0.38954		2.534	0.3367	1.8358	0.5279	0.1196	0.0562	-0.4214	0.0552	-0.1101	0.1894	0.79158		-0.3289	0.0233	-0.4663	0.0374	-0.0042	0.0051	0.0004	0.0062	-0.0493	0.0104	-0.16966		1.0684	0.2062	-0.6079	0.2225	0.3742	0.0956	0.5725	0.0855	-0.2673	0.129	0.22798
	GLU-43	57.8647	0.3641	51.643	0.3251	47.4258	0.2328	48.0506	0.3102	51.1486	0.3901	51.2265		-2.7393	0.1389	-0.7627	0.1387	-0.6234	0.0943	-1.7749	0.1175	-1.052	0.142	-1.39046		0.0033	0.0072	0.0209	0.0097	0.0146	0.0085	0.0007	0.0069	-0.0078	0.0074	0.00634		55.136	0.3338	50.8948	0.3038	46.818	0.2391	46.2746	0.2748	50.1002	0.3695	49.8447
	ASN-44	-0.3489	0.0661	-1.3104	0.095	-0.4969	0.0285	-1.0538	0.0532	-0.3786	0.0659	-0.71772		-0.23	0.0644	0.159	0.0503	-0.1142	0.0473	0.3886	0.0535	-0.1523	0.0734	0.01022		-0.0157	0.0079	-0.0109	0.0079	-0.008	0.0066	0.0013	0.0083	-0.0095	0.0103	-0.00856		-0.5924	0.0685	-1.1632	0.0822	-0.6204	0.0581	-0.6669	0.0582	-0.5418	0.0799	-0.71694
	CYS-45	0.0693	0.0195	0.0645	0.024	-0.2015	0.0175	-0.2191	0.0207	-0.0205	0.0249	-0.06146		-0.1304	0.0246	-0.0667	0.0227	-0.0147	0.0204	0.0097	0.0211	-0.0426	0.0258	-0.04894		-0.0158	0.0072	0.0046	0.0085	-0.0022	0.0058	0.0002	0.0063	0.0155	0.0109	0.00046		-0.0771	0.0308	0.0022	0.027	-0.218	0.0248	-0.2093	0.0264	-0.0467	0.0363	-0.10978
	LEU-46	-0.6558	0.0097	-0.6894	0.0109	-0.3034	0.0077	-0.3349	0.0087	-0.6349	0.0091	-0.52368		0.1382	0.0063	0.1184	0.0084	0.0189	0.004	0.0495	0.0049	0.0696	0.0104	0.07892		-0.0087	0.0097	-0.0028	0.0127	0.0068	0.0104	-0.0046	0.0091	0.0255	0.0135	0.00324		-0.5261	0.0135	-0.5738	0.0167	-0.277	0.014	-0.2899	0.0131	-0.5399	0.0183	-0.44134
	ILE-47	0.1593	0.0075	0.106	0.0106	-0.2244	0.0081	-0.2386	0.0088	0.0453	0.0087	-0.03048		-0.0582	0.0094	-0.0686	0.0111	-0.0173	0.0163	0.0271	0.0197	-0.0166	0.012	-0.02672		-0.0137	0.0124	-0.0126	0.013	0.0015	0.0067	-0.0015	0.0086	0.0007	0.0128	-0.00512		0.0886	0.0168	0.0254	0.0171	-0.2401	0.0179	-0.2127	0.0215	0.0301	0.0195	-0.06174
	GLN-48	0.9048	0.0192	0.371	0.0345	0.0646	0.0189	0.1463	0.0216	0.4131	0.0454	0.37996		-0.2468	0.0457	-0.0423	0.0512	0.0215	0.0499	-0.1073	0.0525	-0.2611	0.083	-0.1272		0.0022	0.0081	0.0032	0.0085	0.0045	0.0089	-0.002	0.01	0.0048	0.0077	0.00254		0.6587	0.0493	0.3341	0.059	0.0926	0.0519	0.0333	0.0562	0.1606	0.0862	0.25586
	GLU-49	36.0752	0.1432	35.2642	0.1205	32.2912	0.1029	33.5689	0.0898	33.4812	0.1151	34.1361		-1.4586	0.0968	-0.8731	0.0998	-0.2341	0.1068	-0.1939	0.1062	-0.6243	0.1429	-0.6768		0.0101	0.0087	-0.0065	0.0098	-0.0063	0.0067	0.0007	0.0062	-0.0235	0.0103	-0.0051		34.622	0.1511	34.3753	0.1632	32.0489	0.1512	33.3794	0.1277	32.8383	0.1694	33.4528
	GLY-50	-0.2464	0.0067	-0.3653	0.0076	-0.2287	0.0059	-0.2694	0.0069	-0.3573	0.0062	-0.29342		0.0006	0.0104	0.0387	0.0112	0.0548	0.0245	0.0372	0.0228	0.0324	0.0195	0.03274		0.0029	0.0067	-0.0002	0.0065	-0.0034	0.0063	0.007	0.0069	0.0168	0.0071	0.00462		-0.2427	0.0131	-0.3264	0.0139	-0.1776	0.0259	-0.2258	0.0254	-0.3083	0.0227	-0.25616
	ALA-51	0.0065	0.0117	-0.0082	0.0115	0.2345	0.0085	0.234	0.0083	0.1471	0.0106	0.12278		0.0917	0.0053	0.0625	0.0052	-0.0597	0.0028	-0.0202	0.0029	0.0042	0.0036	0.0157		0.0011	0.0117	-0.0061	0.01	-0.0048	0.0078	0.0316	0.0095	0.013	0.0061	0.00696		0.0991	0.0145	0.0482	0.0128	0.1694	0.0122	0.2454	0.012	0.1646	0.0101	0.14534
	LEU-52	0.4086	0.0175	0.4816	0.0188	0.0477	0.009	0.1016	0.0102	0.3269	0.0108	0.27328		-0.2995	0.0127	-0.2853	0.0114	0.091	0.0071	-0.0698	0.0075	-0.1148	0.0111	-0.13568		-0.0022	0.0085	0.005	0.0118	-0.0133	0.0095	-0.0067	0.014	0.0205	0.0153	0.00066		0.1059	0.0118	0.2028	0.0165	0.1254	0.0131	0.0251	0.0177	0.232	0.0199	0.13824
	LEU-53	-0.2941	0.0205	-0.1506	0.0222	-0.0806	0.0157	-0.0647	0.0191	-0.1702	0.0156	-0.15204		0.2173	0.007	0.059	0.0095	-0.0937	0.0057	0.0497	0.0063	0.1169	0.0063	0.06984		0.0255	0.0119	0.0003	0.0108	0.0262	0.0079	0.02	0.0107	-0.0014	0.0141	0.01412		-0.0499	0.0204	-0.0919	0.0186	-0.1488	0.0147	0.0045	0.0202	-0.0554	0.0195	-0.0683
	PHE-54	0.0217	0.0431	0.2145	0.0378	0.1793	0.0255	0.1898	0.0286	0.4268	0.0214	0.20642		-0.0698	0.0281	-0.1578	0.0283	-0.2137	0.0183	-0.538	0.0241	-0.6956	0.0287	-0.33498		-0.0048	0.009	0.0004	0.0107	0.0082	0.0095	0.025	0.0138	0.0249	0.0168	0.01074		-0.0543	0.0312	0.0559	0.0253	-0.0246	0.0255	-0.3233	0.0312	-0.2453	0.0364	-0.11832
	CYS-55	-1.2885	0.04	-0.8059	0.0326	-0.6524	0.0749	-1.3088	0.0826	-0.7585	0.0514	-0.96282		0.3492	0.0223	0.0748	0.0237	0.0846	0.0343	0.3117	0.0234	0.1725	0.0177	0.19856		0.0109	0.0059	0.0022	0.0064	0	0.004	0.0005	0.0061	-0.0003	0.0072	0.00266		-0.9282	0.0323	-0.7288	0.0218	-0.5707	0.0434	-0.9945	0.0677	-0.5864	0.05	-0.76172
	GLU-56	109.534	0.8741	113.18	0.4191	79.4623	0.8437	75.5571	0.5866	58.2502	0.6839	87.1968		-30.498	0.7413	-36.0211	0.3914	-3.7457	0.6713	13.1815	0.6527	25.5944	1.0609	-6.29778		0.0061	0.0066	-0.0041	0.008	-0.1952	0.014	-0.4557	0.0128	-0.3163	0.0158	-0.19304		79.0305	0.3133	77.1309	0.2856	75.4981	0.5826	88.3049	0.4475	83.5112	0.5934	80.6951
	GLN-57	-19.8919	0.3027	-15.094	0.2899	-15.7949	0.2972	-16.8471	0.2928	-12.635	0.3106	-16.0526		24.7172	0.3647	19.7581	0.3359	23.1939	0.402	28.8969	0.3975	22.1873	0.3378	23.7507		-1.6486	0.0221	-1.5415	0.0155	-1.7328	0.0176	-2.0287	0.02	-1.9901	0.0169	-1.78834		3.1738	0.3002	3.1318	0.2828	5.6683	0.324	10.0173	0.3371	7.5573	0.2168	5.9097
	ALA-58	-3.0745	0.0579	-2.5763	0.0703	-2.4609	0.0494	-2.5732	0.0472	-2.4711	0.0671	-2.6312		0.4882	0.0185	0.4848	0.0267	0.3484	0.0117	0.1811	0.0158	0.0562	0.0314	0.31174		-0.2007	0.0151	-0.254	0.0113	-0.2042	0.0107	-0.1985	0.012	-0.3121	0.0115	-0.2339		-2.786	0.0595	-2.3442	0.0676	-2.3147	0.049	-2.5927	0.0515	-2.7275	0.0656	-2.55302
	VAL-59	-1.3089	0.0438	-0.9206	0.0657	-0.376	0.0242	-0.1792	0.0284	0.4532	0.0311	-0.4663		0.4662	0.0225	0.6	0.0294	0.1389	0.0118	0.0527	0.0119	0.0907	0.0162	0.2697		-0.0023	0.0084	0.0117	0.007	0.0005	0.0084	0.0079	0.01	-0.0022	0.0078	0.00312		-0.8447	0.0322	-0.3093	0.0439	-0.2364	0.0205	-0.1191	0.0231	0.5415	0.0253	-0.1936
	VAL-60	-0.9637	0.0351	-0.5403	0.0329	0.227	0.0285	0.022	0.0307	0.3606	0.0438	-0.17888		0.4174	0.0185	0.2447	0.0194	-0.0737	0.0126	0.1004	0.0154	-0.0299	0.0137	0.13178		0.0257	0.0122	0.0026	0.0102	-0.0156	0.008	0.0122	0.0117	0.0039	0.0128	0.00576		-0.5205	0.0295	-0.2928	0.0323	0.1388	0.0254	0.136	0.0326	0.336	0.0379	-0.0405
	ALA-61	-0.3732	0.0214	-0.5482	0.0208	-0.1355	0.0152	-0.5544	0.0224	-0.8758	0.0225	-0.49742		0.0446	0.0054	0.1078	0.0074	-0.0004	0.0028	0.0547	0.0059	0.1237	0.006	0.06608		-0.0023	0.0055	-0.0016	0.0068	-0.0016	0.004	0.0014	0.0059	0.0055	0.0079	0.00028		-0.3303	0.0189	-0.4417	0.0179	-0.1375	0.0137	-0.4983	0.0204	-0.7455	0.0209	-0.43066
	PRO-62	0.4864	0.019	0.2929	0.0192	0.6739	0.0101	0.5357	0.0127	0.6488	0.019	0.52754		0.0645	0.0092	0.0606	0.0104	-0.0426	0.0066	0.0114	0.0086	0.0102	0.0084	0.02082		0.0169	0.0088	0.0121	0.009	-0.0074	0.0079	0.0226	0.0113	-0.0112	0.0099	0.0066		0.5686	0.0194	0.3659	0.0224	0.6247	0.0136	0.5699	0.0171	0.6475	0.02	0.55532
	VAL-63	-0.3846	0.0112	-0.2277	0.0244	-0.3195	0.0093	-0.2551	0.0094	-0.3452	0.0139	-0.30642		0.0331	0.0105	-0.0113	0.0098	0.0053	0.0095	0.0132	0.0087	0.0179	0.0094	0.01164		0.0103	0.0121	0.0072	0.0092	0.0088	0.0055	-0.0135	0.0094	-0.029	0.0112	-0.00324		-0.3417	0.0182	-0.232	0.0256	-0.3056	0.0143	-0.2558	0.0155	-0.3569	0.0194	-0.2984
	SER-64	-0.7971	0.0262	-0.7968	0.0294	-0.7626	0.0221	-0.8294	0.0237	-0.9417	0.0281	-0.82552		0.0666	0.042	0.1047	0.0441	0.0151	0.0372	0.0686	0.0432	-0.0429	0.0593	0.04242		0.0001	0.0052	0.0031	0.0052	0.0008	0.0025	-0.0123	0.0062	-0.002	0.0084	-0.00206		-0.7296	0.0493	-0.6864	0.0518	-0.7456	0.0451	-0.772	0.049	-0.9863	0.0624	-0.78398
	GLY-65	0.4875	0.0113	0.4586	0.0116	0.4273	0.0105	0.4327	0.0101	0.4739	0.0117	0.456		-0.0653	0.008	-0.0587	0.0076	-0.0427	0.0115	-0.0581	0.0091	-0.0694	0.0104	-0.05884		0.0059	0.0046	-0.0021	0.004	0.0003	0.0029	-0.0045	0.0056	-0.0101	0.0079	-0.0021		0.4279	0.0121	0.3972	0.0116	0.385	0.0144	0.3698	0.0142	0.3944	0.0166	0.39486
	ASP-66	39.6404	0.1088	39.0436	0.1188	36.3206	0.0959	39.7861	0.1087	42.9974	0.1887	39.5576		-0.9336	0.0832	-0.7976	0.0692	-0.5505	0.0459	-0.6939	0.0769	-0.7536	0.1043	-0.74584		0.0159	0.0076	0.0055	0.008	-0.0083	0.0054	0.0036	0.006	-0.0185	0.0093	-0.00036		38.7265	0.1283	38.2558	0.1374	35.7628	0.1025	39.1021	0.1342	42.2288	0.1866	38.8152
	LEU-67	0.1603	0.0108	0.2318	0.0119	0.4384	0.0133	0.3051	0.016	0.1961	0.0151	0.26634		0.0097	0.003	0.0038	0.0037	-0.0347	0.0066	-0.011	0.0049	0.0024	0.0046	-0.00596		0.0063	0.0108	0.001	0.0122	-0.0243	0.0101	0.0201	0.0116	0.015	0.0138	0.00362		0.1765	0.0143	0.2366	0.0151	0.3799	0.0167	0.3132	0.0186	0.2139	0.0199	0.26402
	VAL-68	0.2016	0.0108	0.1728	0.0106	0.081	0.0106	0.0263	0.0118	-0.0257	0.0133	0.0912		-0.1361	0.0042	-0.1249	0.0033	-0.0288	0.0025	-0.0427	0.0036	-0.0354	0.0041	-0.07358		-0.0097	0.0061	-0.0012	0.0077	-0.0009	0.0076	-0.016	0.0102	-0.0349	0.0186	-0.01254		0.0557	0.0104	0.0461	0.0115	0.0515	0.0109	-0.0327	0.0149	-0.0953	0.0206	0.00506
	PHE-69	-0.2611	0.0198	-0.2738	0.0207	-0.9387	0.0156	-0.5869	0.0247	-0.7991	0.023	-0.57192		0.141	0.0095	0.172	0.0085	0.1502	0.006	0.1325	0.0081	0.1395	0.0079	0.14704		0.0113	0.0062	-0.0133	0.0081	0.0027	0.0104	0.0034	0.0111	0.0142	0.0108	0.00366		-0.1072	0.0177	-0.1154	0.0193	-0.7856	0.0188	-0.4513	0.0259	-0.645	0.0233	-0.4209
	ARG-70	-39.6103	0.1354	-39.9219	0.0942	-38.5639	0.0951	-38.8305	0.092	-38.1336	0.1241	-39.012		1.7272	0.0556	1.8527	0.0453	0.8538	0.0466	0.819	0.0432	0.5992	0.0525	1.17038		-0.0218	0.0088	0.0066	0.0087	-0.0114	0.0082	0.0111	0.0093	-0.0064	0.013	-0.00438		-37.9117	0.116	-38.0629	0.1039	-37.726	0.1021	-38.0005	0.0888	-37.5472	0.1249	-37.8497
	PRO-71	-1.0633	0.0092	-1.1008	0.0079	-0.9547	0.005	-1.108	0.006	-0.8954	0.0057	-1.02444		0.3805	0.0076	0.4027	0.0049	0.1048	0.0095	0.1171	0.0079	0.0783	0.008	0.21668		0.0006	0.0069	-0.0018	0.006	-0.0215	0.0133	-0.0048	0.0112	-0.0207	0.0132	-0.00964		-0.6821	0.0092	-0.7003	0.0096	-0.8703	0.0169	-0.9961	0.0147	-0.8374	0.0157	-0.81724
	LEU-72	0.1669	0.0169	0.3588	0.0157	0.1165	0.0126	0.3717	0.0081	0.0952	0.0102	0.22182		0.0752	0.0109	-0.0203	0.0109	0.0264	0.0157	0.0102	0.0096	0.0258	0.0152	0.02346		0.0109	0.0139	0.024	0.0131	-0.0068	0.0123	-0.013	0.014	0.0047	0.0167	0.00396		0.2543	0.0177	0.3625	0.0165	0.1349	0.024	0.369	0.0184	0.1262	0.0252	0.24938
	LYS-73	-39.3199	0.1973	-39.5496	0.1136	-36.1276	0.1434	-39.5523	0.152	-36.5757	0.141	-38.225		2.2076	0.1185	2.1814	0.1161	0.7328	0.0973	0.9761	0.1028	0.4133	0.1214	1.30224		0.0034	0.0121	0.0314	0.0114	0.0048	0.0048	-0.014	0.0081	0.021	0.014	0.00932		-37.0999	0.1855	-37.3447	0.1494	-35.386	0.1676	-38.5945	0.1716	-36.1366	0.1803	-36.9123
	ILE-74	-0.2688	0.0213	-0.4709	0.0178	-0.4126	0.02	-0.8351	0.0174	-0.7623	0.0135	-0.54994		-0.1577	0.0091	-0.0589	0.0082	-0.0697	0.0081	0.0824	0.0073	0.0865	0.0124	-0.02348		0.0054	0.009	0.0213	0.0088	0.0086	0.0135	0.0101	0.0091	-0.0008	0.0142	0.00892		-0.4213	0.0167	-0.5088	0.0152	-0.474	0.0225	-0.7412	0.0194	-0.6771	0.0214	-0.56448
	GLU-75	52.7109	0.303	53.9015	0.1506	43.9839	0.1941	50.7478	0.22	43.6978	0.1889	49.0084		-6.3348	0.1612	-6.8274	0.0988	-1.2536	0.0756	-1.7222	0.0786	-0.8072	0.0981	-3.38904		-0.0119	0.0077	0.003	0.0078	0.0056	0.0066	0.0005	0.0081	-0.0445	0.0104	-0.00946		46.3535	0.2006	47.07	0.1361	42.7221	0.2054	49.0232	0.1954	42.8399	0.1924	45.6017
	VAL-76	-0.468	0.013	-0.5561	0.0118	-0.3504	0.0122	-0.6483	0.011	-0.5459	0.0106	-0.51374		0.0343	0.0092	0.0614	0.0081	-0.023	0.0069	0.072	0.0047	0.0788	0.0077	0.0447		0.0018	0.0117	0.0104	0.0129	-0.0035	0.0092	-0.0112	0.0121	-0.0217	0.0171	-0.00484		-0.4316	0.0174	-0.4845	0.0162	-0.3767	0.0152	-0.5877	0.0152	-0.489	0.0202	-0.4739
	LEU-77	-0.9371	0.0211	-1.108	0.0167	-0.7007	0.0143	-0.9921	0.0127	-0.8634	0.0131	-0.92026		0.1469	0.011	0.2517	0.0111	0.0496	0.0052	0.1296	0.0051	0.0877	0.0068	0.1331		0.007	0.0162	0.0117	0.0155	0.0152	0.0119	0.0164	0.0162	-0.0077	0.0205	0.00852		-0.7837	0.0213	-0.8443	0.0197	-0.6356	0.0185	-0.8461	0.0219	-0.7816	0.0239	-0.77826
	SER-78	-1.7579	0.0275	-1.9123	0.0254	-0.5486	0.0396	-1.8611	0.0188	-1.6395	0.0166	-1.54388		0.3679	0.0163	0.4958	0.0113	0.1214	0.0202	0.2748	0.0214	0.2414	0.0329	0.30026		-0.0079	0.0071	0.004	0.0059	0.0036	0.0041	0.0135	0.0081	-0.0095	0.0067	0.00074		-1.3989	0.0192	-1.412	0.0189	-0.4258	0.0401	-1.5719	0.0275	-1.4056	0.0346	-1.24284
	LYS-79	-47.3855	0.3011	-48.5583	0.1527	-42.7354	0.1788	-45.232	0.1842	-40.4155	0.1806	-44.8653		5.1812	0.1431	5.7095	0.099	1.7878	0.0947	1.4207	0.0904	0.1832	0.1082	2.85648		0.0132	0.0131	0.0293	0.0146	-0.0132	0.0133	0.0021	0.0147	-0.0237	0.0186	0.00154		-42.1841	0.1916	-42.8203	0.1239	-40.963	0.1888	-43.796	0.1754	-40.2588	0.1846	-42.0044
	LEU-80	-1.2773	0.015	-1.3685	0.011	-0.7977	0.0099	-1.0261	0.0088	-0.9776	0.0109	-1.08944		0.3553	0.0088	0.4033	0.0094	0.0912	0.0083	0.0834	0.0049	0.0965	0.0074	0.20594		0.0049	0.0159	-0.0002	0.0164	-0.0037	0.0145	-0.0036	0.0143	-0.0267	0.0232	-0.00586		-0.9163	0.0197	-0.965	0.0199	-0.7103	0.0202	-0.9474	0.0178	-0.907	0.0255	-0.8892
	LEU-81	-1.2225	0.0266	-1.3695	0.0265	-0.7554	0.0182	-1.0361	0.0146	-0.9569	0.02	-1.06808		0.2013	0.0176	0.3316	0.0212	0.1692	0.0063	0.1756	0.0068	0.1532	0.0104	0.20618		-0.0266	0.0143	-0.011	0.013	-0.0174	0.0096	0.0073	0.0119	0.0248	0.0165	-0.00458		-1.0484	0.0279	-1.0492	0.0259	-0.6043	0.0179	-0.853	0.02	-0.7778	0.0282	-0.86654
	ALA-82	-1.3011	0.0219	-1.2745	0.0168	-0.8439	0.0142	-1.2576	0.0128	-1.4347	0.0226	-1.22236		0.2243	0.0139	0.2802	0.0122	0.0643	0.0115	0.0867	0.0126	0.2937	0.0206	0.18984		0.0045	0.0058	0.0035	0.0051	-0.0022	0.0079	0.0027	0.0067	-0.0243	0.0096	-0.00316		-1.0714	0.0232	-0.9898	0.0191	-0.7815	0.0178	-1.1686	0.0198	-1.166	0.0281	-1.03546
	PHE-83	-1.1954	0.0214	-1.3207	0.0162	-0.6793	0.0113	-1.0001	0.0105	-1.2927	0.0153	-1.09764		0.3258	0.0135	0.3672	0.0134	0.0582	0.0123	0.0498	0.0174	-0.0365	0.0217	0.1529		-0.0037	0.0142	0.0258	0.0168	0.0056	0.0099	0.0267	0.0148	-0.0058	0.0114	0.00972		-0.8743	0.0243	-0.9284	0.0266	-0.6163	0.0191	-0.9239	0.0255	-1.3357	0.0297	-0.93572
	ILE-84	-0.0517	0.0262	0.0761	0.0254	0.2671	0.0118	0.086	0.0131	0.0411	0.0197	0.08372		-0.1565	0.0121	-0.2223	0.0119	-0.0013	0.0068	0.0609	0.0078	0.1265	0.0113	-0.03854		0.0086	0.0143	-0.0086	0.0134	0.0029	0.0084	0.0036	0.0146	0.0274	0.0154	0.00678		-0.198	0.0245	-0.1545	0.0261	0.2687	0.0128	0.1509	0.0202	0.1951	0.0242	0.05244
	ASP-85	23.4291	0.5645	13.5771	0.6292	29.408	0.2631	25.6038	0.2908	23.7763	0.3418	23.1589		11.7196	0.8157	18.9306	0.9004	-0.201	0.0935	-0.317	0.1147	-0.4178	0.1434	5.94288		-0.0896	0.0111	-0.1406	0.0116	-0.002	0.0054	0.008	0.0066	-0.013	0.0089	-0.04744		35.0662	0.5736	32.3438	0.5883	29.1999	0.2474	25.3035	0.2885	23.3477	0.3397	29.0522
	GLY-86	-1.581	0.0506	-1.5351	0.055	0.6022	0.0184	0.9674	0.047	-0.0847	0.0249	-0.32624		0.0503	0.0349	0.0282	0.0342	0.0398	0.012	-0.0511	0.0218	0.1333	0.0239	0.0401		-0.001	0.0042	-0.0074	0.0045	0.0171	0.0096	0.0045	0.0059	0.0297	0.0101	0.00858		-1.5326	0.0418	-1.5155	0.0471	0.6579	0.0248	0.9189	0.0482	0.0788	0.0327	-0.2785
	ALA-87	-1.1408	0.0214	-1.1533	0.0229	0.2511	0.0198	0.007	0.0275	0.1163	0.0204	-0.38394		0.1541	0.021	0.0753	0.0217	0.0589	0.0205	-0.015	0.0179	-0.0014	0.0086	0.05438		0.0032	0.008	0.0034	0.0062	0.0063	0.0043	0.001	0.0046	0.0089	0.0084	0.00456		-0.9846	0.0281	-1.0755	0.0282	0.3168	0.0293	-0.0073	0.0311	0.124	0.0191	-0.32532
	GLY-88	0.1811	0.01	-0.0007	0.0114	0.5124	0.013	0.3591	0.0293	0.5873	0.0155	0.32784		-0.0083	0.0095	0.1416	0.0106	0.0098	0.0099	-0.076	0.0177	-0.1545	0.0133	-0.01748		-0.0086	0.0044	-0.0029	0.0041	-0.0035	0.0025	-0.0042	0.0042	0.0076	0.011	-0.00232		0.1651	0.0123	0.139	0.0118	0.5183	0.0169	0.2794	0.0333	0.441	0.0199	0.30856
	LEU-89	0.1521	0.0151	0.0463	0.019	0.1252	0.0085	0.7074	0.0137	-0.0574	0.013	0.19472		0.0357	0.0226	0.0206	0.0246	0.0203	0.0184	-0.115	0.0154	0.0181	0.0341	-0.00406		-0.0089	0.0167	-0.0228	0.0194	-0.0126	0.0127	0.0039	0.0123	0.0277	0.018	-0.00254		0.1784	0.0306	0.0442	0.0347	0.1321	0.0232	0.5963	0.0232	-0.0126	0.0387	0.18768
	VAL-90	-0.292	0.0211	-0.283	0.0201	0.1656	0.0124	0.7687	0.0223	-0.2567	0.0201	0.02052		0.0205	0.0131	0.0599	0.0151	0.008	0.0047	-0.1032	0.0164	0.0012	0.0117	-0.00272		0.0103	0.0133	-0.0085	0.0117	-0.0185	0.0088	0.016	0.0125	0.0025	0.011	0.00036		-0.2598	0.023	-0.2306	0.0224	0.1546	0.0155	0.6819	0.022	-0.2536	0.0209	0.0185
	ASP-91	35.89	0.4818	20.9695	0.5856	36.0209	0.1839	44.357	0.3843	47.8181	0.4389	37.0111		2.5964	0.3142	15.39	0.4598	0.1259	0.0797	-1.9207	0.1077	-4.7275	0.1781	2.29282		-0.0195	0.0091	-0.0383	0.0095	-0.0066	0.0054	0.0041	0.0052	0.0134	0.0073	-0.00938		38.4879	0.4445	36.3066	0.461	36.1465	0.1916	42.4354	0.3423	43.0809	0.3938	39.2915
	THR-92	2.5201	0.1634	1.4039	0.2432	0.7618	0.0308	0.4635	0.1468	2.1207	0.133	1.454		-0.5661	0.2557	0.7483	0.3069	0.0691	0.0341	-0.496	0.0638	-2.0055	0.0731	-0.45004		-0.1774	0.0182	-0.1899	0.017	0.0203	0.0101	0.0055	0.0084	-0.0179	0.012	-0.07188		1.7702	0.1066	1.9393	0.1051	0.8543	0.045	-0.0224	0.1239	0.0939	0.1087	0.92706
	THR-93	-3.7744	0.3309	-14.9061	0.2432	0.8438	0.0268	-0.178	0.07	0.8172	0.0811	-3.4395		1.7951	0.384	16.2081	0.2318	-0.0325	0.0306	-0.1255	0.0357	-0.5845	0.0656	3.45214		-0.7378	0.0252	-1.1162	0.0229	-0.0003	0.0038	0.0039	0.0049	-0.004	0.0065	-0.37088		-2.7039	0.176	0.1865	0.1999	0.8085	0.0434	-0.3006	0.0652	0.2267	0.0843	-0.35656
	TYR-94	0.9046	0.1473	1.4433	0.1199	0.2234	0.0166	-0.3525	0.0485	-0.287	0.0506	0.38636		-1.7654	0.1644	-2.0782	0.1382	0.0572	0.0306	0.0362	0.0396	0.1276	0.0623	-0.72452		-0.2329	0.0135	-0.1787	0.0143	0.0044	0.0106	-0.0082	0.0113	0.0188	0.0128	-0.07932		-1.0994	0.1162	-0.8164	0.101	0.2856	0.0336	-0.3252	0.046	-0.1367	0.0661	-0.41842
	ALA-95	-7.1044	0.108	-6.3323	0.1115	0.5772	0.0329	1.1089	0.0629	1.7629	0.0651	-1.99754		4.9138	0.0978	3.6573	0.0889	-0.051	0.0236	-0.501	0.055	-2.0636	0.0638	1.1911		-0.2792	0.0106	-0.3376	0.01	-0.0019	0.007	0.0148	0.0111	-0.0053	0.0067	-0.12184		-2.469	0.1038	-3.0194	0.0936	0.5236	0.0341	0.6225	0.0343	-0.305	0.0457	-0.92946
	GLU-96	8.1378	0.78	12.2245	0.6731	44.2738	0.3564	55.1311	0.7153	56.2647	0.6686	35.2064		53.7358	1.3292	47.9515	1.0959	5.1707	0.3557	-9.0079	0.7467	-8.6847	0.8135	17.8331		-1.5904	0.0231	-1.7271	0.0191	-0.0097	0.0099	-0.0401	0.014	-0.2385	0.022	-0.72116		60.2844	0.7417	58.4835	0.601	49.4287	0.2989	46.0328	0.3786	47.3639	0.4172	52.3187
	SER-97	-5.5782	0.2219	-6.2446	0.2012	-6.4817	0.2843	-17.3326	0.3741	-20.8521	0.4359	-11.2978		8.4705	0.3602	9.0719	0.3674	8.3796	0.305	16.2922	0.3332	22.5789	0.3804	12.9586		-0.5236	0.0137	-0.5554	0.017	-0.8449	0.0226	-1.5876	0.0192	-1.4126	0.0236	-0.98482		2.3711	0.2199	2.2613	0.2382	1.0415	0.1578	-2.6283	0.1973	0.315	0.2383	0.67212
	ASP-98	72.6559	0.7101	73.2916	0.4154	44.7859	0.6221	56.3931	0.5241	50.1607	0.6953	59.4574		-0.2131	0.7763	4.4213	0.7593	33.4578	1.377	18.1802	0.6403	30.9742	1.0453	17.3641		-0.6054	0.0114	-0.6475	0.0175	-0.6105	0.0187	-0.7348	0.0138	-0.9481	0.0171	-0.70926		71.851	0.4293	77.0622	0.7964	77.6687	1.0665	73.8344	0.5003	80.2113	0.7363	76.1255
	LYS-99	-133.846	1.0711	-123.461	0.6234	-79.4134	0.5766	-85.3976	0.5851	-89.2848	0.7351	-102.281		67.5655	1.9354	49.5216	1.0202	8.7352	0.5108	24.4081	0.7291	48.6435	1.0589	39.7748		-0.4481	0.0175	-0.3351	0.0156	-0.1047	0.0146	-0.3198	0.0156	-0.5556	0.0186	-0.35266		-66.8181	1.0053	-74.3092	0.7224	-70.7815	0.4437	-61.3068	0.5775	-41.1996	0.7084	-62.883
	TRP-100	1.1357	0.0361	1.1926	0.032	-2.1204	0.1801	-2.4195	0.1038	-2.8101	0.1133	-1.00434		-1.2565	0.0378	-1.0824	0.0371	-0.4177	0.0886	0.6933	0.0765	0.2948	0.097	-0.3537		0.019	0.0141	0.0154	0.0117	-0.2101	0.021	0.0139	0.0132	-0.0339	0.0155	-0.03914		-0.0997	0.0357	0.1269	0.0387	-2.745	0.1323	-1.7101	0.06	-2.5505	0.0836	-1.39568
	VAL-101	-0.6137	0.0167	-0.6144	0.0164	-0.4187	0.0338	-0.3114	0.0226	-0.2852	0.0275	-0.44868		0.1794	0.0117	0.1558	0.01	-0.1325	0.014	0.2355	0.0154	0.1636	0.0269	0.12036		0.0105	0.008	0.0018	0.0091	0.0227	0.0119	-0.0034	0.0135	-0.0114	0.0151	0.00404		-0.4235	0.0113	-0.4574	0.0131	-0.5272	0.0339	-0.0792	0.0249	-0.1331	0.0283	-0.32408
	LEU-102	-0.8148	0.0252	-0.9819	0.0201	-0.5938	0.01	-0.6733	0.0125	-0.666	0.013	-0.74596		0.3347	0.0308	0.4182	0.028	-0.0229	0.018	0.1992	0.0212	0.1509	0.0348	0.21602		-0.035	0.0112	-0.0106	0.0134	-0.0044	0.0113	0.0046	0.0125	0.0074	0.0181	-0.0076		-0.5136	0.0329	-0.5773	0.0291	-0.621	0.0228	-0.4693	0.0272	-0.5075	0.0396	-0.53774
	LEU-103	-0.7637	0.0167	-0.6395	0.0152	-0.0693	0.0131	-0.227	0.0158	-0.4406	0.0116	-0.42802		0.3625	0.0147	0.2773	0.0132	-0.0623	0.0052	0.0776	0.0075	0.1563	0.01	0.16228		-0.0058	0.0078	0.0001	0.0073	0.0019	0.01	0.0106	0.0117	0.0028	0.0144	0.00192		-0.4064	0.0149	-0.3624	0.0138	-0.1295	0.0175	-0.1391	0.0184	-0.2817	0.0191	-0.26382
	SER-104	-0.1617	0.0262	0.1999	0.0237	-0.3641	0.0155	-0.3585	0.0196	-0.4761	0.019	-0.2321		0.0468	0.0302	-0.1475	0.0296	0.042	0.0336	0.0619	0.0403	-0.0738	0.0578	-0.01412		-0.0088	0.007	0.0021	0.0083	-0.0019	0.0059	-0.0106	0.0086	0.0038	0.0114	-0.00308		-0.1239	0.0328	0.0541	0.0334	-0.3245	0.0355	-0.3075	0.043	-0.5445	0.0582	-0.24926
	PRO-105	-0.3651	0.0088	-0.0036	0.0102	-0.0387	0.007	-0.1356	0.0082	-0.2725	0.0047	-0.1631		0.1258	0.0127	-0.0187	0.0098	0.0021	0.0095	0.0175	0.0103	0.0591	0.0158	0.03716		0.0056	0.0077	0.0011	0.0078	-0.0012	0.0058	0.0019	0.0075	-0.0255	0.0128	-0.00362		-0.2336	0.0146	-0.0213	0.0142	-0.0372	0.0128	-0.1156	0.0141	-0.2392	0.0204	-0.12938
	GLU-106	35.3928	0.1375	31.5725	0.1212	29.7445	0.1288	32.9726	0.1529	36.1708	0.1336	33.1706		-1.8205	0.1055	-0.3651	0.1033	-0.1341	0.0972	-0.9406	0.0785	-1.5073	0.0789	-0.95352		-0.0165	0.0083	0.0056	0.0068	-0.0037	0.0063	-0.0072	0.0082	-0.0022	0.0048	-0.0048		33.5476	0.1418	31.2172	0.1535	29.6051	0.1678	32.0202	0.1606	34.6655	0.1209	32.2111
	PHE-107	-0.6627	0.0078	-0.6627	0.0084	-0.4245	0.0079	-0.5737	0.0074	-0.5413	0.0067	-0.57298		0.1984	0.0168	0.1704	0.0199	0.0296	0.0125	0.0675	0.0185	0.0399	0.0266	0.10116		-0.01	0.0073	-0.004	0.0062	-0.0122	0.0063	-0.0017	0.0077	0.0174	0.0093	-0.0021		-0.4743	0.0179	-0.4962	0.0205	-0.4071	0.0151	-0.5092	0.0207	-0.4835	0.0281	-0.47406
	ARG-108	-30.849	0.1109	-30.5385	0.1127	-27.8315	0.1045	-29.5526	0.1113	-30.876	0.103	-29.9295		0.8512	0.0579	0.8957	0.0651	0.1392	0.0417	0.4216	0.0428	0.5719	0.0553	0.57592		-0.0062	0.0084	-0.0122	0.0072	0.0073	0.007	-0.0012	0.01	-0.0087	0.0073	-0.0042		-30.0066	0.1052	-29.6632	0.1107	-27.6862	0.1062	-29.1347	0.1122	-30.3148	0.1023	-29.3611
	ALA-109	-0.137	0.0053	-0.1405	0.0053	-0.0812	0.0047	-0.0441	0.0055	-0.0974	0.0063	-0.10004		0.0248	0.0217	0.0488	0.0245	0.0136	0.0213	-0.0254	0.0257	-0.0957	0.0362	-0.00678		-0.0015	0.0053	-0.0052	0.0047	0.0023	0.0032	-0.0059	0.0059	-0.0067	0.0053	-0.0034		-0.1137	0.0222	-0.0956	0.0258	-0.0665	0.023	-0.0757	0.0253	-0.1979	0.0368	-0.10988
	ILE-110	0.2081	0.0136	0.0994	0.01	0.0186	0.017	0.2267	0.0136	-0.07	0.0104	0.09656		-0.0517	0.0113	-0.0508	0.0097	0.0028	0.0106	-0.0283	0.0071	0.016	0.0193	-0.0224		-0.0024	0.0077	-0.0054	0.0071	-0.0057	0.0049	0.0004	0.0066	-0.0039	0.0086	-0.0034		0.1544	0.0159	0.0432	0.0144	0.0156	0.0199	0.199	0.0166	-0.0573	0.0218	0.07098
	TRP-111	0.7641	0.0193	0.8834	0.0161	0.7382	0.0141	0.8235	0.0138	0.8517	0.0166	0.81218		-0.234	0.032	-0.2078	0.0359	-0.0495	0.0301	-0.0655	0.0352	-0.1523	0.0351	-0.14182		-0.0062	0.0074	-0.0035	0.0093	0.0024	0.0048	0.0058	0.0064	0.0007	0.0106	-0.00016		0.5246	0.0371	0.6737	0.0386	0.6908	0.0326	0.7627	0.0358	0.6998	0.0396	0.67032
	GLN-112	1.0188	0.0404	0.9196	0.0446	0.8051	0.0304	1.3676	0.0364	0.7308	0.0293	0.96838		-0.3419	0.053	-0.3083	0.0604	-0.0262	0.0643	-0.1873	0.0545	-0.2914	0.0712	-0.23102		-0.0023	0.0059	-0.0112	0.0063	0.0085	0.0057	-0.0001	0.0079	-0.0034	0.0083	-0.0017		0.677	0.0637	0.6037	0.0712	0.7857	0.0651	1.1807	0.0602	0.4341	0.0755	0.73624
	ASP-113	38.2983	0.1451	38.7001	0.0908	33.8803	0.1096	36.7476	0.0964	35.9772	0.1161	36.7207		-1.962	0.076	-1.8589	0.0697	-0.4407	0.0664	-0.8478	0.0758	-0.4952	0.0879	-1.12092		-0.0034	0.0061	0.0003	0.0062	-0.0078	0.0055	-0.0006	0.0082	0.0013	0.0093	-0.00204		36.3312	0.1287	36.8339	0.1104	33.4302	0.1167	35.8993	0.1114	35.4838	0.1348	35.5957
	ARG-114	-39.0506	0.1663	-39.0887	0.1255	-35.1847	0.1006	-37.6316	0.0981	-36.4318	0.118	-37.4775		2.5289	0.0566	2.4075	0.0333	0.726	0.036	1.1496	0.0399	0.771	0.0614	1.5166		0.018	0.0087	0.0041	0.008	0.005	0.013	-0.0085	0.0113	-0.0162	0.0151	0.00048		-36.5079	0.1318	-36.6773	0.1128	-34.4581	0.097	-36.4885	0.0907	-35.6809	0.1118	-35.9625
	LYS-115	-47.7008	0.3049	-48.7255	0.1518	-39.3202	0.1998	-40.7215	0.1836	-45.6033	0.189	-44.4143		3.5239	0.1341	3.6694	0.098	0.5656	0.1012	0.5148	0.1059	0.5197	0.1306	1.75868		-0.0052	0.0136	-0.0218	0.0158	-0.0059	0.0146	-0.0076	0.0143	-0.0025	0.0137	-0.0086		-44.1866	0.2246	-45.0872	0.1545	-38.7611	0.2062	-40.2157	0.2052	-45.0747	0.2048	-42.6651
	ARG-116	-33.6564	0.1305	-33.7648	0.0958	-30.4317	0.0962	-32.3289	0.1138	-32.4012	0.1201	-32.5166		0.799	0.0574	0.6903	0.0514	0.2236	0.0495	0.2067	0.0551	-0.0882	0.0638	0.36628		-0.0092	0.011	0.0109	0.0104	-0.0085	0.0077	0.0251	0.0093	0.0102	0.0108	0.0057		-32.8634	0.1188	-33.0639	0.1014	-30.2146	0.1072	-32.1013	0.1162	-32.4829	0.1309	-32.1452
	CYS-117	0.1976	0.0166	0.1856	0.0184	-0.1312	0.0112	-0.2485	0.0111	-0.5649	0.0138	-0.11228		-0.1951	0.0078	-0.1684	0.009	0.0028	0.0059	-0.0076	0.0048	0.0027	0.0085	-0.07312		-0.0154	0.0053	0.005	0.0065	0	0.0036	0.0002	0.0046	-0.0056	0.006	-0.00316		-0.0116	0.014	0.0226	0.0154	-0.1281	0.0119	-0.2557	0.0114	-0.567	0.0157	-0.18796
	GLU-118	37.3422	0.1626	37.4744	0.1043	32.6852	0.1039	35.1416	0.0985	32.2329	0.1179	34.9753		-2.7286	0.076	-2.4094	0.0778	-0.4342	0.0786	-0.6468	0.0742	-0.4819	0.0917	-1.34018		-0.0082	0.0129	-0.0063	0.0115	0.0042	0.008	0.0011	0.0108	0.0213	0.0099	0.00242		34.5959	0.1409	35.0558	0.1073	32.2632	0.1123	34.4951	0.1173	31.772	0.1471	33.6364
	TYR-119	0.0007	0.0144	-0.1443	0.0136	-0.1682	0.0097	-0.3579	0.009	-0.0506	0.0085	-0.14406		-0.1565	0.0238	-0.0456	0.0256	0.0023	0.0239	0.0102	0.0278	-0.0867	0.0434	-0.05526		-0.0128	0.0071	0.0003	0.0072	0.0099	0.011	0.0109	0.012	-0.0352	0.011	-0.00538		-0.1674	0.0275	-0.1875	0.0289	-0.1554	0.0282	-0.3371	0.0319	-0.1738	0.0458	-0.20424
	TRP-120	0.1323	0.0147	0.0088	0.0138	0.154	0.0131	0.3145	0.0101	0.4591	0.0076	0.21374		-0.1825	0.0236	-0.0974	0.0221	0.0748	0.0252	-0.0346	0.0172	-0.0705	0.0352	-0.06204		0.0052	0.0076	0.0068	0.0084	0.0022	0.0056	0.0056	0.009	0.007	0.0132	0.00536		-0.0444	0.0256	-0.082	0.0255	0.2322	0.0279	0.2846	0.0207	0.3955	0.0382	0.15718
	PHE-121	-0.0099	0.0133	-0.2917	0.0139	-0.2977	0.0102	-0.3433	0.0103	-0.1046	0.01	-0.20944		-0.0506	0.0068	0.0719	0.0061	0.0398	0.0046	0.0365	0.0082	-0.0446	0.0072	0.0106		0.0016	0.0087	0.005	0.0073	0.0126	0.0083	-0.0325	0.0119	-0.0166	0.014	-0.00598		-0.0581	0.0125	-0.2152	0.0125	-0.2454	0.0132	-0.3386	0.015	-0.1652	0.0181	-0.2045
	LEU-122	0.1705	0.013	-0.0922	0.0116	-0.0931	0.007	-0.2257	0.0085	0.016	0.0098	-0.0449		-0.1026	0.0068	0.0108	0.0061	0.0174	0.0038	0.0167	0.0075	-0.0309	0.0065	-0.01772		-0.0044	0.0183	-0.0084	0.0158	0.0109	0.0137	0.0398	0.0179	0.0034	0.0233	0.00826		0.0629	0.0216	-0.0902	0.0184	-0.0656	0.0164	-0.1694	0.0214	-0.0113	0.0253	-0.05472
	GLN-123	0.386	0.0181	0.2347	0.0164	-0.0995	0.0322	-0.3502	0.0354	-0.0246	0.0297	0.02928		-0.0989	0.0394	0.003	0.0401	-0.004	0.0373	0.0074	0.0232	-0.1025	0.0626	-0.039		0.0137	0.0118	-0.008	0.0086	-0.0001	0.0078	-0.0146	0.0066	0.0176	0.0132	0.00172		0.2996	0.0418	0.2302	0.0442	-0.1031	0.0509	-0.3587	0.0421	-0.1118	0.0665	-0.00876
	GLN-124	-0.6929	0.0452	-0.7482	0.0365	-0.3938	0.0218	0.1142	0.0361	0.4296	0.0323	-0.25822		0.2705	0.0288	0.3759	0.0395	0.0411	0.0172	-0.0741	0.0316	-0.1676	0.033	0.08916		-0.0136	0.011	-0.0057	0.0088	-0.006	0.0089	-0.0262	0.0105	0.0072	0.0074	-0.00886		-0.4361	0.0426	-0.3765	0.0431	-0.3593	0.0283	0.0117	0.046	0.2708	0.0399	-0.17788
	ILE-125	0.3349	0.017	-0.0375	0.0166	-0.0851	0.0082	-0.1389	0.0108	0.4484	0.0119	0.10436		-0.037	0.0102	0.1177	0.0107	0.0398	0.0093	0.017	0.0107	-0.1431	0.0095	-0.00112		-0.0075	0.0162	0.0181	0.0161	-0.0037	0.0092	-0.0088	0.0144	-0.0309	0.0199	-0.00656		0.2915	0.0225	0.0997	0.0216	-0.0487	0.015	-0.1306	0.0194	0.2744	0.0237	0.09726
	ILE-126	-0.1428	0.0171	-0.2654	0.0158	-0.1881	0.0097	-0.2177	0.0105	0.2576	0.0216	-0.11128		0.1552	0.0183	0.1547	0.0168	0.0258	0.0139	0.0254	0.0152	-0.0607	0.0134	0.06008		0.0116	0.0159	-0.011	0.0168	0.0072	0.013	-0.0043	0.0192	-0.0221	0.019	-0.00372		0.0258	0.029	-0.1225	0.0292	-0.1561	0.0216	-0.1952	0.0261	0.1738	0.0283	-0.05484
	THR-127	-0.1542	0.0173	-0.031	0.0176	0.0671	0.0116	0.1377	0.0169	0.2815	0.0175	0.06022		-0.0799	0.0364	-0.1002	0.0338	0.0335	0.0271	0.0111	0.021	-0.0957	0.0338	-0.04624		-0.0013	0.0074	0.0114	0.0119	0.0224	0.0099	0.0067	0.0116	0.0087	0.0116	0.00958		-0.2353	0.0408	-0.1196	0.0381	0.1222	0.031	0.1554	0.0276	0.1957	0.0345	0.02368
	PRO-128	-0.6206	0.0169	-0.456	0.0133	-0.3158	0.0051	-0.4457	0.0048	-0.5064	0.0059	-0.4689		0.3841	0.0159	0.2488	0.0162	0.0203	0.0135	0.0341	0.0132	0.0783	0.0246	0.15312		0.0161	0.0086	0.0139	0.0083	-0.0065	0.009	-0.0086	0.0094	0.0044	0.0138	0.00386		-0.2205	0.0192	-0.1933	0.0208	-0.3029	0.0164	-0.4205	0.0162	-0.4237	0.0289	-0.31218
	SER-129	0.6993	0.0202	0.7104	0.0189	0.4593	0.0101	0.224	0.0269	-0.2305	0.0064	0.3725		-0.5194	0.0287	-0.3897	0.0258	-0.027	0.0226	-0.0516	0.0274	-0.0349	0.0333	-0.20452		0.0008	0.0071	-0.0084	0.0061	-0.0145	0.007	-0.012	0.0056	0.0168	0.0054	-0.00346		0.182	0.0302	0.3124	0.028	0.4167	0.0259	0.1616	0.0347	-0.2478	0.0342	0.16498
	PRO-130	1.5095	0.021	1.1256	0.0193	0.4586	0.0067	0.6405	0.0074	0.764	0.0106	0.89964		-1.3388	0.0195	-0.9631	0.0165	0.0228	0.0045	-0.1603	0.0079	-0.337	0.0107	-0.55528		0.0019	0.0076	0.0044	0.0084	0.0019	0.0091	0.0034	0.0075	0.001	0.0109	0.00252		0.1734	0.0127	0.1658	0.0132	0.4836	0.0118	0.4833	0.0116	0.4282	0.0131	0.34686
	ALA-131	2.132	0.0223	1.8763	0.0127	0.9022	0.007	1.1293	0.0084	1.2299	0.011	1.45394		-1.5274	0.0257	-1.1829	0.0194	0.0088	0.0159	-0.2537	0.0144	-0.4272	0.0131	-0.67648		0.0061	0.0079	0.0135	0.0088	0.0063	0.0082	0.0047	0.0089	-0.009	0.0079	0.00432		0.6112	0.0197	0.7065	0.0193	0.9161	0.0178	0.8803	0.0164	0.7928	0.0114	0.78138
	PHE-132	1.3976	0.0237	1.2919	0.0192	0.8971	0.0094	1.0613	0.01	1.0308	0.0124	1.13574		-0.9335	0.0167	-0.7417	0.0138	-0.0344	0.0054	-0.1926	0.0097	-0.278	0.0128	-0.43604		-0.0098	0.0066	0.0083	0.0077	0.0074	0.0064	-0.0005	0.009	-0.0044	0.0109	0.0002		0.4547	0.014	0.5588	0.0141	0.8703	0.0112	0.868	0.0122	0.7487	0.0151	0.7001
	ASN-133	0.7997	0.042	1.0076	0.0295	0.5131	0.0126	0.5692	0.0134	0.739	0.0164	0.72572		-0.9118	0.0403	-0.8783	0.0319	-0.0272	0.0112	-0.1094	0.0213	-0.3162	0.0193	-0.44858		0.0094	0.0141	0.0012	0.0119	0.0027	0.0052	-0.0188	0.0098	0.0109	0.0107	0.00108		-0.1063	0.0362	0.1313	0.0387	0.4867	0.0185	0.4411	0.0257	0.4334	0.0239	0.27724
	LYS-134	-62.6276	0.4266	-61.9807	0.373	-39.2631	0.1628	-43.361	0.2632	-46.5108	0.2867	-50.7486		19.759	0.3056	16.1897	0.2555	-0.2846	0.1041	2.6915	0.1316	3.6277	0.1897	8.39666		-0.007	0.0107	-0.0026	0.0104	0.0112	0.0121	0.0065	0.0132	0.0218	0.0144	0.00598		-42.9141	0.2897	-45.8005	0.2834	-39.542	0.1832	-40.6454	0.2401	-42.8436	0.222	-42.3491
	VAL-135	2.154	0.0291	2.1467	0.02	1.0843	0.013	1.2164	0.0149	1.1391	0.0163	1.5481		-1.3782	0.0271	-1.2868	0.018	-0.0139	0.008	-0.1635	0.0143	-0.2739	0.0181	-0.62326		-0.0114	0.011	-0.0075	0.012	-0.001	0.0113	-0.0169	0.017	0.0542	0.0176	0.00348		0.766	0.0175	0.8531	0.0176	1.0694	0.0154	1.037	0.0202	0.9189	0.0217	0.92888
	LEU-136	0.3343	0.034	0.5748	0.0329	0.594	0.014	0.5265	0.0184	0.1609	0.0185	0.4381		-0.1626	0.0251	-0.3867	0.026	-0.0051	0.0089	0.2054	0.0125	0.3417	0.0135	-0.00146		-0.0015	0.0153	-0.0022	0.0125	0.0113	0.0091	-0.0165	0.011	0.0024	0.0145	-0.0013		0.1703	0.0217	0.1883	0.021	0.6003	0.0148	0.7158	0.0178	0.5053	0.0194	0.436
	ALA-137	-0.4553	0.0697	-0.4103	0.0614	0.0489	0.0209	-0.0437	0.033	-0.3091	0.0366	-0.2339		-0.4676	0.0591	-0.7383	0.0565	0.2552	0.0189	0.43	0.0284	0.5758	0.0331	0.01102		0.0213	0.01	0.0246	0.0107	-0.0054	0.0054	0.0035	0.0065	0.0031	0.0062	0.00942		-0.899	0.0341	-1.1276	0.0333	0.2988	0.0134	0.3906	0.0188	0.2692	0.0158	-0.2136
	LEU-138	1.4803	0.0441	1.8292	0.0367	-0.0137	0.0365	-0.1823	0.0465	-0.7254	0.0404	0.47762		-0.9899	0.0409	-1.2586	0.0315	0.5738	0.0295	0.8021	0.0426	1.336	0.0409	0.09268		0.0018	0.0075	0.0002	0.0069	0.0058	0.0078	0.0249	0.0156	0.0106	0.0181	0.00866		0.4907	0.031	0.5716	0.0309	0.567	0.0309	0.6458	0.0373	0.6223	0.0376	0.57948
	LEU-139	1.3351	0.0486	2.0775	0.0486	0.7488	0.0265	0.4045	0.0309	-0.2223	0.0351	0.86872		-0.3232	0.0306	-0.9052	0.0302	0.3387	0.0253	1.0733	0.0309	1.4238	0.0338	0.32148		-0.0131	0.0161	-0.0124	0.0154	-0.0003	0.0089	-0.008	0.0153	-0.0004	0.0167	-0.00684		0.9979	0.0312	1.1566	0.0335	1.0877	0.0208	1.4693	0.0234	1.2012	0.0283	1.18254
	ARG-140	-46.4222	0.4976	-45.3612	0.4552	-36.9376	0.2654	-35.5774	0.2715	-31.133	0.3407	-39.0863		10.4602	0.3768	11.0547	0.3903	0.6265	0.1161	0.8733	0.1323	-1.8816	0.185	4.22662		-0.0704	0.0146	-0.0986	0.0157	0.0001	0.0077	0.0271	0.0126	-0.0083	0.0181	-0.03002		-36.0049	0.3213	-34.3929	0.2762	-36.3097	0.2043	-34.6878	0.19	-33.0208	0.2555	-34.8832
	LYS-141	-180.816	0.7577	-174	0.6253	-64.0409	0.7889	-103.32	1.0773	-118.763	1.0571	-128.188		173.875	0.8346	170.811	0.9214	16.5587	1.1828	78.8487	1.355	82.9412	1.3128	104.607		-2.2349	0.0229	-2.2349	0.02	-0.3823	0.0219	-0.9744	0.0201	-0.9721	0.0187	-1.35972		-9.1963	0.7696	-5.3781	0.6827	-47.8613	0.7313	-25.4703	0.7345	-36.7698	0.6801	-24.9352
	SER-142	-4.5031	0.0595	-3.0989	0.0635	0.2388	0.0641	-0.3124	0.0655	-1.635	0.0649	-1.86212		1.535	0.055	1.0029	0.0382	-1.5082	0.0621	-1.6809	0.0676	-1.2223	0.0807	-0.3747		0.0153	0.0079	0.0075	0.0049	0.0031	0.0039	-0.0029	0.0036	-0.0021	0.0049	0.00418		-2.9532	0.0485	-2.0861	0.0501	-1.2646	0.0531	-1.9968	0.0529	-2.8571	0.0617	-2.23156
	GLU-143	125.509	1.125	117.75	0.707	20.4597	0.9409	5.4525	0.6621	50.968	0.7911	64.0279		-29.7431	1.0791	-20.6067	0.7758	78.6941	1.4504	112.646	0.8683	31.4723	1.103	34.4925		-0.7333	0.0284	-0.7635	0.0226	-1.9625	0.0189	-2.0382	0.0197	-1.4448	0.0195	-1.38846		94.9941	0.8992	96.3963	0.6052	97.2448	0.8107	116.043	0.6378	81.0329	0.5506	97.1423
	SER-144	-1.443	0.0695	-5.9074	0.0492	-5.4445	0.0652	-4.8046	0.061	-4.6035	0.0599	-4.4406		0.6908	0.056	2.3713	0.0436	0.213	0.0591	-0.303	0.0612	-0.6279	0.0548	0.46884		-0.012	0.0106	0.0035	0.0106	0.0085	0.0061	-0.0171	0.0081	-0.0048	0.008	-0.00438		-0.7663	0.0485	-3.5361	0.0355	-5.2223	0.055	-5.1258	0.0722	-5.2332	0.039	-3.97674
	TYR-145	-4.4863	0.0434	-4.1393	0.0378	-3.1892	0.0417	-2.2937	0.0451	-2.5313	0.0426	-3.32796		1.6479	0.0289	1.5724	0.0261	-0.0626	0.0363	-1.0344	0.0352	-0.7126	0.0416	0.28214		0.005	0.007	-0.0131	0.0063	-0.0051	0.0053	0.003	0.013	-0.0191	0.0121	-0.00586		-2.8338	0.0385	-2.5793	0.0329	-3.2578	0.0363	-3.3243	0.0447	-3.2611	0.0409	-3.05126
	TRP-146	-14.7248	0.1415	-15.6907	0.1623	-5.2287	0.2615	-9.0544	0.1524	-9.3221	0.1605	-10.8041		6.6109	0.121	7.513	0.1375	3.0157	0.1858	4.5587	0.0987	3.2286	0.0904	4.98538		-1.9379	0.0281	-1.8834	0.0247	-0.4056	0.0236	-0.6807	0.0201	-0.7868	0.0219	-1.13888		-10.055	0.1206	-10.0462	0.1379	-2.6162	0.1512	-5.1697	0.1147	-6.8798	0.1404	-6.95338
	LEU-147	-5.4852	0.0761	-5.0332	0.0395	-4.6467	0.0652	-5.8001	0.0635	-7.1589	0.0893	-5.62482		1.3919	0.0375	1.3183	0.0209	0.2136	0.0261	-0.2161	0.0294	0.1557	0.0332	0.57268		0.0047	0.0113	0.0227	0.011	-0.0839	0.0114	-0.0909	0.0103	-0.2151	0.0147	-0.0725		-4.0859	0.0535	-3.6919	0.038	-4.5162	0.0648	-6.1031	0.0679	-7.2272	0.0856	-5.12486
	VAL-148	-3.3904	0.0391	-3.2945	0.0222	-2.1006	0.0217	-2.254	0.0203	-2.0479	0.0232	-2.61748		1.0948	0.0252	1.1694	0.0147	0.2839	0.0161	0.0342	0.0161	-0.1166	0.0166	0.49314		0.0164	0.0086	0.0059	0.0092	0.0032	0.0103	-0.0036	0.0092	-0.0149	0.0134	0.0014		-2.2796	0.0221	-2.1192	0.0198	-1.8139	0.0175	-2.2234	0.0171	-2.1771	0.0196	-2.12264
	GLY-149	-3.4934	0.0353	-3.5372	0.0298	-1.2	0.0196	-1.5705	0.0188	-1.0223	0.0219	-2.16468		1.0718	0.0246	1.2698	0.0235	0.0274	0.0167	-0.0662	0.0184	-0.4977	0.0231	0.36102		0.0182	0.005	0.0105	0.0041	-0.0064	0.0083	0.0066	0.0058	-0.0077	0.0065	0.00424		-2.4033	0.029	-2.2568	0.0324	-1.1777	0.0182	-1.6301	0.0197	-1.5261	0.0211	-1.7988
	TYR-150	-6.0669	0.2673	-6.9842	0.1313	-2.1029	0.0947	-8.2996	0.1956	-6.0903	0.2267	-5.90878		2.997	0.1799	2.513	0.1414	0.514	0.0761	4.9542	0.2695	3.6825	0.2861	2.93214		-0.257	0.0141	-0.1574	0.0127	-0.0272	0.0112	-0.1872	0.0182	-0.2331	0.0184	-0.17238		-3.33	0.2199	-4.6315	0.0872	-1.6187	0.0648	-3.5256	0.1093	-2.6532	0.1264	-3.1518
	LEU-151	-1.8097	0.0377	-1.6192	0.0277	-1.7672	0.0157	-2.1863	0.0205	-1.7617	0.019	-1.82882		0.5946	0.0173	0.6359	0.0151	0.3565	0.0111	0.3005	0.0136	-0.062	0.0124	0.3651		-0.0143	0.0134	0.0059	0.0149	0.0116	0.0129	0.012	0.0163	-0.002	0.0129	0.00264		-1.2315	0.0324	-0.9771	0.0285	-1.399	0.0177	-1.8733	0.0214	-1.8255	0.0185	-1.46128
	LEU-152	-0.7323	0.0376	-0.9451	0.0386	-1.0665	0.0127	-1.0213	0.0184	-0.65	0.0185	-0.88304		0.4034	0.0187	0.5178	0.0195	0.2112	0.0094	0.0042	0.0148	-0.2355	0.0122	0.18022		0.0094	0.0109	-0.0063	0.0082	-0.0161	0.0124	-0.0004	0.0106	-0.0258	0.0163	-0.00784		-0.3184	0.0328	-0.4313	0.0329	-0.8715	0.0155	-1.0173	0.0178	-0.9119	0.0208	-0.71008
	ALA-153	-0.9209	0.0418	-0.896	0.0433	-0.8244	0.0145	-0.6944	0.0265	-0.2354	0.0222	-0.71422		0.343	0.027	0.4568	0.028	0.1266	0.0164	-0.1427	0.0273	-0.4771	0.0267	0.06132		0.0043	0.0034	0.0057	0.0034	0.0068	0.0064	-0.0158	0.0071	0.014	0.0083	0.003		-0.5753	0.0449	-0.4317	0.0452	-0.6907	0.0186	-0.8514	0.0236	-0.6993	0.0264	-0.64968
	GLN-154	0.4489	0.0786	0.3505	0.0941	0.003	0.0889	0.6665	0.1731	0.7182	0.1474	0.43742		0.2951	0.0532	0.1552	0.0612	0.0382	0.0478	-0.9381	0.1256	-1.447	0.1168	-0.37932		0.0135	0.007	0.0273	0.0098	-0.0011	0.0082	-0.0119	0.0086	0.0028	0.0104	0.00612		0.7643	0.084	0.5365	0.0955	0.0401	0.082	-0.2801	0.1116	-0.7247	0.1241	0.06722
	SER-155	1.1766	0.0308	1.3608	0.0325	0.4381	0.0186	0.8578	0.032	0.8215	0.0219	0.93096		-0.3421	0.0409	-0.3358	0.0426	-0.0824	0.0301	-0.22	0.032	-0.2448	0.0218	-0.24502		0.0032	0.0041	-0.0083	0.0039	-0.0049	0.0061	0.0011	0.0081	-0.0062	0.0062	-0.00302		0.8406	0.0498	1.0187	0.0511	0.35	0.0353	0.6412	0.0422	0.5707	0.0293	0.68424
	THR-156	0.3723	0.0505	0.5866	0.0504	0.6604	0.0403	0.6941	0.0352	0.6591	0.0199	0.5945		-0.0023	0.0402	0.0531	0.0427	-0.0088	0.0394	-0.0034	0.04	-0.1175	0.0526	-0.01578		-0.0226	0.0191	-0.015	0.0143	-0.001	0.0095	0.0056	0.0087	-0.0017	0.0067	-0.00694		0.3491	0.0627	0.6237	0.0552	0.6492	0.0557	0.6988	0.0528	0.5397	0.0552	0.5721
	SER-157	1.0402	0.033	1.1464	0.0385	0.6521	0.0376	0.4874	0.0421	1.004	0.0243	0.86602		-0.3207	0.0315	-0.3765	0.0353	-0.2952	0.0278	-0.0758	0.0273	-0.1256	0.038	-0.23876		-0.0004	0.0035	0.0059	0.0049	-0.0039	0.0021	0.0121	0.0073	-0.0092	0.0122	0.0009		0.7193	0.0398	0.7741	0.0412	0.3516	0.0393	0.4244	0.0458	0.8674	0.0451	0.62736
	GLY-158	1.2421	0.0198	1.4557	0.0173	0.534	0.022	0.9909	0.0281	1.2617	0.0244	1.09688		-0.3848	0.0284	-0.5052	0.0256	-0.4246	0.0239	-0.2729	0.0256	-0.1366	0.0166	-0.34482		0.0111	0.0067	0.0065	0.008	0.0058	0.0051	-0.0203	0.0086	0.0052	0.0076	0.00166		0.8688	0.026	0.9585	0.0294	0.1149	0.0293	0.6973	0.038	1.1302	0.0257	0.75394
	ASN-159	1.6543	0.0545	1.8213	0.0661	0.403	0.0555	1.3056	0.0527	1.267	0.0825	1.29024		-0.2213	0.0559	-0.246	0.0515	-0.0864	0.0559	-0.1852	0.0558	-0.2627	0.077	-0.20032		-0.0006	0.0058	-0.0061	0.008	0.0088	0.0062	0.0168	0.0074	-0.0016	0.0094	0.00346		1.4343	0.0824	1.5697	0.0861	0.3311	0.0742	1.1373	0.077	1.0098	0.1106	1.09644
	THR-160	0.9466	0.0331	0.92	0.046	-0.9005	0.0474	-0.5063	0.0372	-0.3055	0.019	0.03086		-0.2555	0.0168	-0.2942	0.0242	0.1078	0.0197	0.1268	0.0207	0.1806	0.0339	-0.0269		0.0003	0.0058	-0.0065	0.006	0.0051	0.0076	0.0218	0.0085	-0.0122	0.01	0.0017		0.6925	0.0264	0.619	0.0375	-0.7845	0.0439	-0.3584	0.035	-0.1367	0.0373	0.00638
	MET-161	1.6708	0.0752	1.6974	0.0849	1.2755	0.0774	0.9406	0.0687	0.2828	0.0518	1.17342		-0.3639	0.0273	-0.4415	0.033	-0.7395	0.0427	-0.3777	0.0329	-0.1517	0.0304	-0.41486		-0.0156	0.0094	0.0032	0.0093	-0.0296	0.0103	-0.0077	0.0117	-0.0075	0.0157	-0.01144		1.2887	0.057	1.2588	0.0572	0.5059	0.0452	0.5551	0.0451	0.1219	0.0477	0.74608
	ARG-162	-41.0118	0.4635	-45.8557	0.4009	-29.8648	0.5405	-37.5874	0.4166	-28.1205	0.4336	-36.488		1.3106	0.0949	1.6354	0.0678	2.1227	0.0976	2.1032	0.081	1.2448	0.0863	1.68334		0.0031	0.0128	-0.0136	0.0146	0.0112	0.0085	-0.0032	0.0097	-0.0588	0.0152	-0.01226		-39.7039	0.4254	-44.2171	0.3732	-27.7079	0.494	-35.4967	0.379	-26.9227	0.4139	-34.8097
	MET-163	0.1424	0.0641	0.2886	0.0582	-3.2387	0.0875	-1.5808	0.0688	-1.2963	0.0357	-1.13696		-0.0304	0.0189	-0.0125	0.0231	1.7101	0.0608	0.9785	0.047	0.7963	0.0371	0.6884		0.0111	0.01	-0.019	0.0114	0.007	0.0074	0.005	0.0113	-0.0004	0.0109	0.00074		0.1218	0.0594	0.2572	0.0484	-1.5227	0.0716	-0.5958	0.0568	-0.5011	0.0319	-0.44812
	LEU-164	0.4851	0.0401	0.9892	0.0426	-3.5897	0.0723	-4.1206	0.0635	-4.0444	0.0587	-2.05608		-0.1005	0.0136	-0.4126	0.03	2.1408	0.0597	2.4213	0.0585	2.4784	0.0534	1.30548		-0.0062	0.0151	-0.0145	0.0168	-0.003	0.0074	-0.0031	0.0116	-0.0029	0.0101	-0.00594		0.3802	0.0392	0.5643	0.0379	-1.454	0.0395	-1.7043	0.0339	-1.5715	0.0376	-0.75706
	GLY-165	1.9125	0.0433	2.1431	0.0389	-1.4758	0.0818	-2.5379	0.0759	-2.7351	0.0654	-0.53864		-0.1135	0.0144	-0.3604	0.023	0.4664	0.078	0.7041	0.064	1.169	0.0517	0.37312		-0.0015	0.0035	0.0057	0.0035	-0.0011	0.002	0.0012	0.0032	-0.008	0.0071	-0.00074		1.798	0.0384	1.7877	0.0325	-1.0077	0.036	-1.8317	0.0326	-1.5721	0.0345	-0.16516
	GLU-166	42.3415	0.445	49.3583	0.482	1.1111	1.2072	13.3328	0.646	12.1841	0.4637	23.6656		-1.3012	0.133	-2.2175	0.139	7.5791	0.9465	0.253	0.2337	-0.4264	0.2412	0.7774		0.004	0.0095	-0.0061	0.0102	-0.2032	0.0196	-0.0032	0.009	-0.0127	0.0104	-0.04424		41.0321	0.4305	47.1262	0.4138	8.4342	0.5904	13.627	0.5239	11.7564	0.4168	24.3952
	ASP-167	27.1145	0.4602	39.1894	0.5449	-40.2362	1.3128	-42.5502	1.1586	-35.153	0.9132	-10.3271		-2.5447	0.1581	-4.5875	0.284	53.7246	1.7944	47.6314	1.4605	38.3221	1.1868	26.5092		-0.0042	0.0068	-0.1031	0.0142	-0.7875	0.0206	-0.5718	0.0168	-0.4611	0.0176	-0.38554		24.5505	0.4695	34.4982	0.487	12.5453	0.8786	4.5144	0.6558	2.6766	0.6496	15.757
	TYR-168	-2.8124	0.3023	-4.8033	0.3865	-17.1578	0.5073	-32.5332	0.3686	-27.9437	0.3301	-17.0501		2.3948	0.2289	4.5608	0.3049	12.0687	0.4368	25.1667	0.3146	24.584	0.3268	13.755		-0.3896	0.0285	-0.6509	0.042	-1.824	0.0262	-2.2565	0.0191	-2.2507	0.0221	-1.47434		-0.8117	0.1573	-0.924	0.1971	-6.9064	0.1886	-9.6164	0.2408	-5.6032	0.201	-4.77234
	GLY-169	3.6823	0.1269	3.6326	0.0931	-0.025	0.1903	-1.7106	0.1533	-2.6092	0.1734	0.59402		0.105	0.0489	0.4195	0.0301	-0.8996	0.2501	-0.1121	0.1256	1.5921	0.1886	0.22098		0.0047	0.0033	-0.0116	0.0047	-0.881	0.0147	-0.7199	0.0101	-0.7879	0.0113	-0.47914		3.7913	0.1229	4.0447	0.0919	-1.7874	0.1924	-2.5415	0.109	-1.8109	0.1315	0.33924
	VAL-170	-2.5594	0.0878	-2.6671	0.0523	-14.4678	0.1199	-14.2923	0.1166	-13.2634	0.1212	-9.45		0.5934	0.0412	0.7273	0.0278	3.9838	0.0849	4.0732	0.1025	3.3622	0.0881	2.54798		-0.0084	0.0092	-0.0139	0.0092	-0.7267	0.0176	-0.7342	0.0172	-0.8123	0.0198	-0.4591		-1.9755	0.0659	-1.9553	0.0427	-11.2102	0.1261	-10.9521	0.1176	-10.7184	0.1281	-7.3623
	SER-171	-1.3505	0.1724	-1.8643	0.1829	-14.5888	0.1936	-14.7839	0.1749	-13.3476	0.1769	-9.18702		-0.8169	0.1071	-0.9656	0.0998	14.3436	0.1501	13.8712	0.143	12.7979	0.1271	7.84604		-0.0018	0.0063	-0.0033	0.0051	-0.9313	0.019	-0.8585	0.021	-0.9158	0.0175	-0.54214		-2.1702	0.1223	-2.8373	0.1287	-1.177	0.2026	-1.7787	0.1927	-1.4705	0.1833	-1.88674
	TYR-172	0.4696	0.056	0.4308	0.058	0.3042	0.0793	0.6423	0.0845	0.5203	0.0543	0.47344		-0.8063	0.0469	-0.7129	0.0453	-0.4743	0.0604	-0.1741	0.0495	0.1294	0.0588	-0.40764		-0.0023	0.0157	-0.0269	0.0156	-0.0113	0.0087	-0.0111	0.0089	-0.0432	0.0131	-0.01896		-0.3382	0.058	-0.3097	0.0582	-0.1867	0.0563	0.4568	0.0861	0.6104	0.0735	0.04652
	THR-173	1.283	0.1497	0.6089	0.1577	1.0754	0.2288	-0.3266	0.1679	-0.2674	0.1304	0.47466		-1.3628	0.0977	-1.285	0.0873	-2.0333	0.1773	-1.078	0.097	-0.0716	0.0726	-1.16614		0.0072	0.0094	-0.0293	0.0111	-0.0191	0.0073	0.0014	0.0093	-0.0078	0.0088	-0.00952		-0.0843	0.0984	-0.6999	0.1026	-0.9748	0.1067	-1.4045	0.1219	-0.3513	0.1056	-0.70296
	HIS-174	-11.3195	1.3203	-13.093	1.159	-51.8753	0.5093	-32.6351	0.3925	-33.6764	0.4243	-28.5199		11.8801	1.4267	13.4643	1.2004	46.2077	0.4605	23.4359	0.5231	28.8011	0.6396	24.7578		-0.5218	0.0344	-0.7132	0.0212	-1.9956	0.0174	-1.6166	0.0218	-1.6941	0.0218	-1.30826		0.0952	0.2403	-0.2932	0.2519	-7.6403	0.2371	-10.8278	0.2909	-6.5816	0.3296	-5.04954
	PHE-175	0.4421	0.056	0.3215	0.0545	0.0359	0.0659	-0.6952	0.0606	-0.5513	0.0474	-0.0894		-0.5278	0.0343	-0.5825	0.0304	0.5998	0.044	1.1486	0.0331	1.228	0.0262	0.37322		0.0052	0.0104	-0.0051	0.0101	-0.0136	0.0084	-0.0036	0.0091	-0.0344	0.0131	-0.0103		-0.0798	0.0376	-0.267	0.0368	0.6224	0.0371	0.4485	0.0426	0.6446	0.0372	0.27374
	ARG-176	-53.2461	0.483	-61.142	0.3875	-66.2858	0.5729	-64.0186	0.5289	-52.5244	0.509	-59.4434		4.2414	0.1922	5.5657	0.1385	10.6356	0.2066	5.9666	0.1513	3.1488	0.09	5.91162		-0.0039	0.0128	-0.0197	0.0142	-0.0054	0.0085	0.0024	0.0112	0.0003	0.0118	-0.00526		-49.0295	0.3506	-55.6118	0.3145	-55.6543	0.4916	-58.062	0.461	-49.3847	0.4679	-53.5485
	ARG-177	-119.301	2.163	-136.972	1.8558	-190.449	1.3348	-177.167	1.5105	-132.474	1.7931	-151.272		31.6793	1.7991	47.6941	2.0143	101.349	1.5502	77.7014	2.1037	34.4742	1.5882	58.5796		-0.0927	0.0136	-0.3513	0.0247	-0.8143	0.0223	-0.8485	0.0314	-0.34	0.03	-0.48936		-87.6299	0.7326	-89.5589	0.4641	-89.9023	0.4918	-100.294	0.6671	-98.3942	0.6596	-93.1559
	LEU-178	-1.785	0.0757	-2.483	0.0536	-5.2731	0.094	-3.9434	0.0717	-3.9441	0.0596	-3.48572		0.4153	0.0481	0.6057	0.0377	2.735	0.0509	1.2798	0.0391	1.3844	0.0222	1.28404		-0.007	0.0158	0.0168	0.0137	-0.2793	0.0182	-0.2016	0.0182	-0.2849	0.0175	-0.1512		-1.3749	0.0422	-1.8611	0.0364	-2.8145	0.0618	-2.8627	0.0495	-2.8447	0.0547	-2.35158
	CYS-179	-2.1906	0.0728	-2.8338	0.0551	-3.8451	0.0951	-3.4416	0.0745	-2.3058	0.0526	-2.92338		0.5263	0.0447	0.8354	0.0318	2.6892	0.0539	1.7115	0.0401	1.0781	0.0214	1.3681		-0.0078	0.0096	-0.0166	0.0116	0.0196	0.0092	-0.0295	0.0116	0.0005	0.0156	-0.00676		-1.6734	0.0464	-2.0144	0.0383	-1.1364	0.0541	-1.7601	0.051	-1.2269	0.0438	-1.56224
	SER-180	-1.254	0.0694	-1.675	0.0664	-3.7912	0.2032	-2.8698	0.171	-1.1405	0.1257	-2.1461		0.4571	0.0612	0.8816	0.0621	2.6152	0.1048	1.5906	0.087	0.2737	0.0538	1.16364		-0.0011	0.0082	0.0156	0.0084	0.0166	0.0088	-0.0087	0.0087	-0.0114	0.0091	0.0022		-0.7947	0.0602	-0.7826	0.0563	-1.1558	0.1435	-1.2919	0.137	-0.8734	0.1302	-0.97968
	ARG-181	-134.061	2.7512	-135.955	1.2478	-185.754	1.1983	-153.796	1.3318	-96.8576	0.5084	-141.285		53.515	3.0824	50.5415	1.276	100.221	1.5045	59.499	1.6102	6.0315	0.342	53.9617		-0.2958	0.0257	-0.1387	0.0173	-0.884	0.0203	-0.4283	0.0214	-0.0609	0.0145	-0.36154		-80.8874	0.5644	-85.5363	0.311	-86.5374	0.4463	-94.7817	0.4299	-90.8733	0.3149	-87.7232
	ALA-182	-1.3702	0.0378	-1.8917	0.0285	-2.2834	0.0344	-1.7384	0.0388	-1.037	0.0332	-1.66414		0.4493	0.0316	0.7408	0.0202	1.2408	0.0214	0.6079	0.0231	0.1658	0.0182	0.64092		-0.0037	0.0075	-0.0013	0.0067	0.0074	0.0052	0.0039	0.0091	0.0042	0.0076	0.0021		-0.9252	0.0207	-1.1525	0.0192	-1.0344	0.0277	-1.1256	0.0332	-0.8693	0.0305	-1.0214
	LEU-183	-1.6846	0.0339	-1.9913	0.0197	1.4469	0.0324	1.4508	0.0339	1.3067	0.0308	0.1057		0.4545	0.0249	0.6469	0.0134	-0.0199	0.0227	-0.0272	0.0177	-0.07	0.0239	0.19686		0.0024	0.0109	0.0056	0.0113	0.0166	0.013	-0.0088	0.0135	-0.011	0.0207	0.00096		-1.2269	0.02	-1.3383	0.016	1.4434	0.0281	1.4156	0.0317	1.2261	0.0368	0.30398
	GLY-184	0.4523	0.0213	0.567	0.0203	1.8458	0.105	2.083	0.0847	1.9157	0.0759	1.37276		0.2179	0.019	0.2207	0.0192	0.0017	0.0231	-0.031	0.023	-0.0853	0.0294	0.0648		-0.0056	0.0078	-0.0078	0.0075	0.0041	0.003	-0.0018	0.0045	-0.0012	0.0031	-0.00246		0.6643	0.021	0.7794	0.0197	1.8523	0.0923	2.0528	0.0806	1.8309	0.0774	1.43594
	GLY-185	1.9653	0.0341	2.221	0.024	1.8807	0.0697	1.653	0.0504	1.41	0.054	1.826		-0.4398	0.0234	-0.5873	0.0204	-0.2461	0.0262	-0.124	0.0246	-0.0402	0.0255	-0.28748		-0.0036	0.0092	-0.0134	0.0077	0.0028	0.004	-0.008	0.0052	0.0047	0.0053	-0.0035		1.5231	0.0263	1.622	0.0243	1.6371	0.064	1.5211	0.0543	1.375	0.0618	1.53566
	LYS-186	-46.5368	0.529	-48.0785	0.4037	-52.2014	0.5383	-44.7831	0.468	-45.2557	0.4081	-47.3711		0.4121	0.1166	0.5131	0.1101	0.1617	0.1095	-0.2218	0.1199	-0.5196	0.1531	0.0691		-0.0011	0.004	0.0034	0.0046	0.002	0.0029	-0.0085	0.0041	-0.002	0.0047	-0.00124		-46.1459	0.5151	-47.5554	0.4148	-52.0255	0.5195	-45.0101	0.4903	-45.7825	0.4534	-47.3039
	ALA-187	-0.8652	0.0265	-1.0832	0.0255	-1.5476	0.0326	-0.9456	0.0303	-0.9677	0.0249	-1.08186		-0.1584	0.016	-0.0943	0.016	-0.1615	0.0181	-0.0493	0.0202	0.0116	0.029	-0.09038		-0.0167	0.0118	-0.0094	0.0113	0.0082	0.007	-0.0102	0.0091	0.0344	0.0102	0.00126		-1.0401	0.0254	-1.1863	0.0244	-1.7027	0.0326	-1.0041	0.0351	-0.9231	0.0396	-1.17126
	LYS-188	-37.8623	0.2897	-41.1955	0.2154	-42.0373	0.2649	-33.1604	0.3122	-33.9965	0.2787	-37.6504		0.6067	0.1291	1.0082	0.126	0.2528	0.1066	0.2053	0.112	-0.4215	0.1522	0.3303		0.0038	0.009	-0.0081	0.0086	0.0048	0.0035	-0.0141	0.0102	-0.0019	0.0085	-0.0031		-37.2589	0.2932	-40.2006	0.2368	-41.7842	0.2826	-32.9825	0.3191	-34.4153	0.3295	-37.3283
	SER-189	-1.0465	0.029	-1.1008	0.0329	-1.07	0.0375	-1.0102	0.0344	-0.9689	0.0335	-1.03928		-0.0151	0.0383	0.0592	0.0375	0.0137	0.0349	0.0476	0.0382	-0.0939	0.0488	0.0023		-0.0021	0.0044	-0.0011	0.0041	0.0017	0.0047	0.0009	0.005	-0.0099	0.0063	-0.0021		-1.064	0.0438	-1.0435	0.0485	-1.0553	0.0494	-0.9604	0.0477	-1.0724	0.0563	-1.03912
	GLU-190	45.5451	0.2848	46.9077	0.1599	48.8197	0.2096	47.0624	0.2469	43.4391	0.222	46.3548		-4.2691	0.1233	-4.4914	0.0932	-2.9222	0.0796	-1.6823	0.0947	-0.1772	0.0897	-2.70844		0.0018	0.0081	0.0124	0.0085	0.0113	0.0082	0.0045	0.0088	-0.0188	0.0109	0.00224		41.2763	0.1992	42.4307	0.1412	45.9113	0.1953	45.3972	0.2136	43.2335	0.2125	43.6498
	LEU-191	-0.833	0.0157	-1.0099	0.0138	-1.1423	0.0141	-0.9131	0.0132	-0.9203	0.014	-0.96372		-0.0145	0.0064	0.0341	0.0078	0.0793	0.0049	0.0513	0.0053	0.057	0.0083	0.04144		-0.0148	0.015	-0.0029	0.017	0.0057	0.0153	0.0299	0.0178	-0.0238	0.0238	-0.00118		-0.863	0.0203	-0.978	0.0191	-1.058	0.0188	-0.8305	0.0221	-0.8873	0.0275	-0.92336
	ARG-192	-31.665	0.1911	-34.3552	0.1659	-32.6052	0.1711	-29.4369	0.1768	-28.1986	0.1612	-31.2522		1.0251	0.0518	1.0941	0.053	0.549	0.0444	0.2668	0.0548	-0.1317	0.0621	0.56066		-0.0125	0.0096	-0.0074	0.0086	-0.0002	0.0063	-0.01	0.0087	0.0132	0.0112	-0.00338		-30.6477	0.1701	-33.2793	0.1561	-32.0615	0.1691	-29.1723	0.1851	-28.3171	0.1726	-30.6956
	ASN-193	-2.278	0.0283	-2.5094	0.0193	-2.075	0.0551	-1.6651	0.0647	-1.9049	0.0422	-2.08648		0.2515	0.0299	0.3552	0.0297	0.1203	0.0448	0.0376	0.0411	-0.0755	0.0531	0.13782		0.0014	0.0053	0.0049	0.007	0.0027	0.0079	0.0085	0.0101	-0.0321	0.0159	-0.00292		-2.0235	0.0293	-2.1496	0.0334	-1.9539	0.0701	-1.6189	0.0719	-2.0132	0.072	-1.95182
	TRP-194	-1.5351	0.0258	-1.7379	0.0238	-2.3671	0.0197	-2.2421	0.0231	-2.2386	0.0192	-2.02416		0.5778	0.0128	0.6448	0.0116	0.3054	0.0098	0.1903	0.011	0.1196	0.0144	0.36758		0.0043	0.0074	-0.0033	0.0083	0.0015	0.0082	-0.0049	0.008	-0.0004	0.0097	-0.00056		-0.9535	0.0194	-1.097	0.0202	-2.0601	0.0212	-2.0561	0.0248	-2.1204	0.0235	-1.65742
	ARG-195	-30.4318	0.2333	-32.4879	0.1879	-28.9725	0.1593	-25.3424	0.1878	-21.9759	0.1948	-27.8421		2.3921	0.0797	2.8996	0.061	1.0851	0.0565	0.3428	0.0672	-0.8811	0.0718	1.1677		0.0121	0.0103	0.0096	0.0092	-0.0104	0.0118	-0.0215	0.0086	0.0182	0.0101	0.0016		-28.024	0.2126	-29.5784	0.1742	-27.8973	0.1532	-25.0193	0.159	-22.8435	0.1664	-26.6725
	MET-196	-0.9401	0.0296	-0.9934	0.0288	-0.5427	0.0212	-0.6401	0.0226	-0.9451	0.0239	-0.81228		0.2192	0.0148	0.2559	0.0159	0.0732	0.0106	0.05	0.0103	0.0089	0.0138	0.12144		-0.0116	0.0118	0.0007	0.0106	0.0076	0.0104	0.0037	0.0096	0.0325	0.0121	0.00658		-0.7336	0.0288	-0.7367	0.0279	-0.4615	0.0247	-0.5868	0.0247	-0.9044	0.0311	-0.6846
	ALA-197	-0.7594	0.0113	-0.9231	0.0083	-0.8088	0.0066	-0.6337	0.0084	-0.6175	0.0073	-0.7485		0.2004	0.0077	0.2375	0.0062	0.105	0.0032	0.0394	0.005	-0.0356	0.0071	0.10934		0.0104	0.0081	0.0244	0.0092	0.0002	0.0068	-0.0084	0.0082	-0.0063	0.012	0.00406		-0.5479	0.0121	-0.6613	0.0132	-0.7034	0.0092	-0.6025	0.0124	-0.6597	0.0151	-0.63496
	GLN-198	-0.635	0.0501	-0.9463	0.0425	-0.808	0.0272	-0.6313	0.0643	-0.0121	0.028	-0.60654		0.2827	0.0451	0.4296	0.0376	0.1123	0.0322	0.0116	0.0351	-0.1537	0.0522	0.1365		-0.0026	0.0076	0.0073	0.0051	0.0059	0.0067	-0.0015	0.0065	-0.0024	0.0089	0.00134		-0.3559	0.0557	-0.5066	0.0542	-0.6926	0.0401	-0.621	0.0764	-0.1706	0.0624	-0.46934
	SER-199	-0.5704	0.0194	-0.6385	0.0192	-0.7771	0.0128	-0.4802	0.0136	-0.6922	0.0141	-0.63168		0.1023	0.0318	0.1876	0.0294	0.1203	0.026	0.0231	0.0334	-0.078	0.0361	0.07106		0.0071	0.0074	0.0003	0.0072	-0.0009	0.007	-0.0073	0.0061	0.0008	0.0091	0		-0.4598	0.0362	-0.4518	0.0344	-0.6574	0.0286	-0.464	0.0352	-0.7678	0.0415	-0.56016
	LEU-200	-0.642	0.0074	-0.6965	0.0057	-0.6248	0.0037	-0.5433	0.0058	-0.5488	0.0049	-0.61108		0.1462	0.0051	0.1396	0.0058	0.0573	0.0052	0.0305	0.0075	-0.0161	0.0074	0.0715		-0.0074	0.0093	0.0024	0.0132	0.0038	0.0073	-0.0104	0.0129	0.0162	0.0188	0.00092		-0.5035	0.012	-0.5546	0.0152	-0.5637	0.0097	-0.5237	0.016	-0.5479	0.0216	-0.53868
	LEU-201	-0.4976	0.0075	-0.5688	0.006	-0.5483	0.0048	-0.3541	0.0088	-0.3327	0.006	-0.4603		0.1378	0.0083	0.1323	0.0057	0.0634	0.0044	0.0092	0.0132	-0.0701	0.0208	0.05452		0.0477	0.0143	0.0187	0.0135	0.0143	0.0127	0.0056	0.0153	0.0041	0.0187	0.01808		-0.3108	0.0177	-0.418	0.0158	-0.471	0.0134	-0.339	0.0211	-0.3985	0.0297	-0.38746
	ASN-202	-0.3369	0.0301	-0.3989	0.0277	-0.3796	0.038	-0.0494	0.0288	-0.1713	0.0341	-0.26722		0.0122	0.0521	0.0859	0.0552	-0.018	0.0435	-0.0503	0.0476	-0.1414	0.0731	-0.02232		0.0026	0.0062	0.0153	0.006	0.0021	0.0041	-0.0074	0.0058	-0.009	0.0064	0.00072		-0.3237	0.0593	-0.2978	0.0608	-0.3945	0.0543	-0.1059	0.0555	-0.3207	0.0761	-0.28852
	SER-203	-0.3415	0.0071	-0.3483	0.0054	-0.2851	0.0062	-0.3266	0.0084	-0.4599	0.0129	-0.35228		0.0499	0.0238	0.0495	0.0232	0.0218	0.0215	0.0396	0.0247	-0.0434	0.0359	0.02348		-0.0159	0.0072	-0.0014	0.0067	-0.0117	0.005	-0.005	0.0086	0.0076	0.0122	-0.00528		-0.3067	0.0246	-0.3017	0.026	-0.2751	0.0229	-0.2936	0.0287	-0.4977	0.0402	-0.33496
	VAL-204	-0.3813	0.0077	-0.401	0.0061	-0.4493	0.0046	-0.2511	0.0124	-0.1303	0.0065	-0.3226		0.087	0.0116	0.0733	0.0101	0.0309	0.015	0.0152	0.0126	-0.047	0.0214	0.03188		-0.0122	0.0115	-0.0234	0.0149	-0.0048	0.008	-0.0132	0.0096	0.0004	0.0144	-0.01064		-0.3078	0.0164	-0.3511	0.019	-0.4237	0.018	-0.2486	0.0187	-0.1777	0.0248	-0.30178
	GLU-205	24.7549	0.1648	22.754	0.1668	24.9895	0.1304	23.1175	0.1187	18.8953	0.1075	22.9022		-0.561	0.0957	-0.2207	0.1063	-0.1629	0.1137	-0.116	0.1033	-0.449	0.1406	-0.30192		-0.0225	0.0136	-0.0285	0.0162	-0.0028	0.008	-0.0191	0.0092	0.0028	0.0077	-0.01402		24.1774	0.1786	22.4993	0.1894	24.8282	0.168	22.9875	0.1562	18.4508	0.1727	22.5886
	GLY-206	-0.3665	0.0054	-0.2902	0.0058	-0.3623	0.0035	-0.1546	0.0172	-0.2016	0.0025	-0.27504		0.0568	0.0171	0.0369	0.0161	0.0288	0.0155	-0.027	0.0178	0.0094	0.0214	0.02098		-0.0078	0.0028	-0.0058	0.0034	0.0018	0.0035	-0.0045	0.0039	-0.0079	0.0036	-0.00484		-0.3176	0.0168	-0.2586	0.0171	-0.3309	0.0157	-0.1871	0.0262	-0.2003	0.0222	-0.2589
	HIS-207	-0.388	0.0255	-0.15	0.0256	-0.5161	0.0135	-0.2289	0.0208	-0.3118	0.0115	-0.31896		-0.009	0.054	0.0843	0.0544	0.0791	0.05	0.0441	0.0503	-0.0897	0.0409	0.02176		0.0158	0.0076	-0.0043	0.0072	-0.0001	0.006	-0.002	0.009	0.0091	0.0099	0.0037		-0.3798	0.0573	-0.0691	0.0584	-0.4386	0.0507	-0.1914	0.0546	-0.3934	0.0432	-0.29446
	GLU-208	22.3591	0.1065	21.8829	0.0965	22.1694	0.0968	21.3253	0.0876	20.8981	0.0958	21.727		-0.3652	0.0689	-0.3278	0.0917	-0.1167	0.0773	-0.1119	0.0896	-0.0772	0.0561	-0.19976		-0.0333	0.0121	-0.0128	0.009	0.0185	0.0125	0.0031	0.0117	-0.0066	0.0142	-0.00622		21.9585	0.118	21.5378	0.1312	22.0653	0.1258	21.2229	0.1345	20.8062	0.1039	21.5181
	ASN-209	0.365	0.0178	0.3287	0.0165	0.3632	0.0107	0.4102	0.0098	0.2895	0.0122	0.35132		-0.1243	0.0491	-0.0702	0.0463	0.0387	0.0433	0.0263	0.0516	-0.0436	0.0583	-0.03462		0.0035	0.0066	0.0033	0.0061	0.0011	0.0043	-0.0052	0.0062	-0.0035	0.007	-0.00016		0.2441	0.054	0.2614	0.049	0.4054	0.0448	0.4319	0.053	0.2421	0.0603	0.31698
	ILE-210	0.1288	0.0058	0.1277	0.0052	0.1815	0.0037	0.1624	0.0049	0.048	0.005	0.12968		-0.0357	0.0122	-0.0133	0.0116	-0.0002	0.0145	0.0035	0.0105	0.003	0.0244	-0.00854		0.0021	0.0099	-0.016	0.013	-0.0138	0.0074	-0.0087	0.0134	-0.0303	0.0129	-0.01334		0.0948	0.0167	0.0991	0.0178	0.1677	0.0169	0.1571	0.0185	0.0203	0.0282	0.1078
	THR-211	0.1789	0.0072	0.1722	0.0071	0.167	0.0073	0.1772	0.0065	0.072	0.0066	0.15346		-0.0423	0.0257	0.0007	0.0275	-0.0105	0.0258	0.029	0.0239	-0.1075	0.0368	-0.02612		0.0064	0.0065	0.0007	0.006	-0.0039	0.0048	-0.008	0.0078	0.0246	0.0183	0.00396		0.1432	0.0268	0.1736	0.0296	0.1518	0.0285	0.1993	0.0249	-0.0132	0.042	0.13094
	GLN-212	0.2416	0.0105	0.1688	0.0146	0.0343	0.0194	0.0502	0.0172	0.0578	0.0112	0.11054		-0.0067	0.0478	0.0057	0.0464	0.0264	0.0432	0.0734	0.05	-0.1074	0.0675	-0.00172		0.0071	0.0091	-0.0041	0.008	-0.0007	0.0065	0.0011	0.0077	-0.0001	0.0102	0.00066		0.2413	0.0492	0.1709	0.0506	0.0613	0.0466	0.1242	0.0522	-0.0493	0.0702	0.10968
	LEU-213	0.0886	0.0068	0.1106	0.0066	0.157	0.0048	0.0735	0.0065	-0.0642	0.006	0.0731		-0.0013	0.0028	0.0022	0.0025	0.0002	0.0024	-0.0023	0.0028	-0.0016	0.0059	-0.00056		0.0197	0.0118	-0.0113	0.0113	-0.003	0.0066	-0.0002	0.0135	-0.0292	0.0199	-0.0048		0.1066	0.013	0.1021	0.0131	0.1544	0.008	0.0716	0.0153	-0.0965	0.0221	0.06764
	ALA-214	0.1783	0.0055	0.1835	0.0063	0.2042	0.0043	0.1743	0.006	0.0207	0.0043	0.1522		-0.0068	0.0035	0.0084	0.0035	-0.0022	0.0056	0.0058	0.0033	-0.0008	0.0053	0.00088		-0.0051	0.0049	-0.0115	0.0066	0.0056	0.0041	-0.0127	0.0057	0.0045	0.006	-0.00384		0.1668	0.0079	0.1798	0.009	0.2075	0.0085	0.1674	0.0088	0.0245	0.0098	0.1492
	VAL-215	0.0389	0.0058	0.0754	0.006	0.1142	0.005	0.0519	0.0063	-0.0863	0.0048	0.03882		-0.0034	0.0144	0.0268	0.0146	0.0027	0.0117	-0.0076	0.0115	-0.0151	0.0184	0.00068		-0.0001	0.0057	-0.0009	0.0056	0.0009	0.0049	-0.0016	0.0062	-0.0011	0.0116	-0.00056		0.0347	0.016	0.1013	0.018	0.1173	0.0132	0.0425	0.0139	-0.101	0.0228	0.03896
	ASN-216	-0.109	0.0203	-0.0409	0.0218	0.0262	0.0231	-0.1029	0.0193	-0.2305	0.018	-0.09142		0.0293	0.0493	0.1357	0.0535	0.0203	0.0587	-0.0324	0.0591	-0.1984	0.0656	-0.0091		-0.0022	0.0068	-0.0028	0.0076	0.0032	0.0055	0.0057	0.006	0.0075	0.0075	0.00228		-0.0819	0.0542	0.0915	0.0572	0.0475	0.0604	-0.1312	0.0612	-0.4162	0.0735	-0.09806
	HIS-217	0.5869	0.0205	0.5469	0.0253	0.7011	0.0152	0.6402	0.0233	-0.4043	0.033	0.41416		-0.0555	0.0449	-0.0368	0.0384	-0.0112	0.0327	0.0524	0.0444	-0.1238	0.0453	-0.03498		0.0201	0.01	-0.0038	0.0107	0.0064	0.0064	-0.0051	0.0086	-0.0012	0.0092	0.00328		0.552	0.0502	0.5036	0.0445	0.6945	0.0352	0.6887	0.0499	-0.5289	0.0575	0.38198
	GLY-218	0.1592	0.0096	0.1629	0.009	0.2071	0.0087	0.2235	0.0096	0.0515	0.0087	0.16084		-0.0078	0.018	0.0459	0.0172	0.0199	0.0164	-0.0115	0.0182	-0.059	0.0324	-0.0025		-0.004	0.0019	0.0034	0.0019	0.003	0.0019	0.0036	0.0034	-0.0021	0.0048	0.00078		0.1483	0.0214	0.2117	0.0187	0.2305	0.0174	0.2167	0.022	-0.009	0.034	0.15964
	TYR-219	0.0153	0.0067	0.0204	0.0063	0.0038	0.0071	-0.0268	0.0097	0.1365	0.0086	0.02984		-0.0014	0.0239	0.0404	0.0248	-0.0104	0.0305	-0.0097	0.0283	-0.0957	0.0332	-0.01536		0.0001	0.0125	-0.0237	0.0116	0.0048	0.0069	-0.0053	0.0088	-0.0045	0.0073	-0.00572		0.0158	0.0261	0.0364	0.0285	-0.0021	0.0327	-0.041	0.0317	0.0379	0.0353	0.0094
	SER-220	-0.212	0.0113	-0.2091	0.0106	-0.2244	0.0096	-0.2996	0.0112	-0.118	0.0071	-0.21262		-0.026	0.0405	0.1431	0.0444	-0.0059	0.0284	-0.0096	0.0414	-0.1484	0.059	-0.00936		-0.01	0.0048	-0.0038	0.0043	0.0032	0.0042	0.005	0.0039	0.0084	0.0094	0.00056		-0.248	0.0419	-0.0723	0.0474	-0.227	0.0302	-0.3042	0.0436	-0.255	0.0595	-0.2213
	SER-221	0.2777	0.0089	0.2827	0.0075	0.2112	0.0082	0.2065	0.0103	0.1642	0.0098	0.22846		-0.0622	0.0246	0.0041	0.0288	0.0083	0.0207	0.0421	0.0308	-0.0665	0.0451	-0.01484		-0.0061	0.0037	0.0005	0.0026	0.0007	0.0042	-0.0027	0.0041	0.0101	0.0056	0.0005		0.2098	0.0261	0.2887	0.0316	0.2203	0.0208	0.2458	0.0347	0.1087	0.047	0.21466
	PRO-222	0.3091	0.0025	0.3018	0.0019	0.2544	0.0028	0.2728	0.0026	0.2548	0.0022	0.27858		-0.0386	0.0056	-0.0175	0.0053	-0.0144	0.006	-0.0015	0.0059	-0.0039	0.0066	-0.01518		-0.0031	0.0075	0.0018	0.009	0.0116	0.0081	-0.016	0.0102	0.0172	0.0163	0.0023		0.2675	0.0096	0.2857	0.0106	0.2518	0.011	0.2558	0.0126	0.2683	0.0168	0.26582
	SER-223	0.4982	0.0099	0.5413	0.0091	0.3772	0.0088	0.4875	0.0109	0.368	0.0082	0.45444		-0.0782	0.0369	-0.0353	0.0365	0.038	0.0313	0.0001	0.0404	-0.0507	0.0492	-0.02522		0.0048	0.0039	0.0056	0.0031	-0.0029	0.0027	-0.0003	0.0037	-0.0026	0.0047	0.00092		0.4271	0.0391	0.5129	0.0383	0.4114	0.0316	0.487	0.0405	0.3155	0.0497	0.43078
	HIS-224	-0.1448	0.0157	-0.1671	0.0162	0.1921	0.0384	0.1635	0.0339	0.5261	0.0185	0.11396		-0.026	0.044	0.0099	0.048	0.0242	0.0377	-0.0668	0.0443	-0.058	0.0466	-0.02334		0.0051	0.0059	-0.0076	0.0054	0.0023	0.0059	-0.0018	0.0071	-0.0007	0.0077	-0.00054		-0.1666	0.045	-0.1657	0.051	0.2176	0.0557	0.0974	0.0561	0.4686	0.0523	0.09026
	PHE-225	0.5756	0.0056	0.5668	0.0049	0.5113	0.0042	0.6313	0.0058	0.5121	0.0044	0.55942		-0.048	0.0032	-0.04	0.0038	-0.0153	0.0035	-0.0167	0.0042	-0.0109	0.0046	-0.02618		-0.0084	0.0078	0.002	0.0081	0.0016	0.006	-0.006	0.0066	0.0045	0.0082	-0.00126		0.5194	0.0099	0.5284	0.0098	0.498	0.0076	0.6083	0.009	0.5056	0.0104	0.53194
	SER-226	0.7126	0.0112	0.6973	0.0083	0.5616	0.0095	0.6775	0.0101	0.5327	0.0094	0.63634		-0.1028	0.0245	-0.0777	0.0217	0.0013	0.0285	-0.0611	0.0302	-0.0978	0.035	-0.06762		0.0075	0.0095	0.0101	0.0091	-0.0164	0.0074	-0.0083	0.0069	-0.0201	0.0099	-0.00544		0.6166	0.0293	0.6296	0.0234	0.5457	0.0303	0.6066	0.0317	0.4163	0.0387	0.56296
	SER-227	0.6513	0.0129	0.6695	0.0127	0.4809	0.0105	0.5384	0.0125	0.4562	0.0138	0.55926		-0.0309	0.0327	-0.0832	0.0381	-0.0096	0.033	-0.0234	0.0376	-0.129	0.0488	-0.05522		0.0028	0.0056	-0.0112	0.0052	-0.0024	0.0039	0.0057	0.005	-0.0072	0.0076	-0.00246		0.6224	0.037	0.5753	0.0384	0.4668	0.0336	0.5209	0.0392	0.3189	0.0547	0.50086
	GLU-228	29.1189	0.1357	28.8883	0.1286	29.1116	0.1059	32.2661	0.1452	28.0388	0.1316	29.4847		-0.4875	0.0725	-0.2804	0.0777	-0.1126	0.0899	-0.1863	0.101	-0.1469	0.1031	-0.24274		-0.0116	0.0114	0.0202	0.01	0.017	0.0082	0.0003	0.0097	0.0045	0.0133	0.00608		28.6225	0.1542	28.6328	0.1458	29.0169	0.1443	32.0872	0.1762	27.8983	0.157	29.2515
	ILE-229	0.8379	0.0067	0.8366	0.0046	0.6755	0.0042	0.7251	0.0055	0.5858	0.0049	0.73218		-0.1382	0.0035	-0.1352	0.0039	-0.0529	0.0036	-0.0384	0.0032	0.011	0.0061	-0.07074		0.0043	0.0098	0.001	0.011	0.0061	0.0087	-0.0076	0.0137	-0.0106	0.0159	-0.00136		0.7038	0.0112	0.7022	0.0116	0.6287	0.0099	0.6793	0.0142	0.5859	0.0165	0.65998
	LYS-230	-27.8398	0.1296	-28.7097	0.1094	-25.8899	0.1241	-27.9459	0.1351	-24.5267	0.1032	-26.9824		0.2156	0.0968	0.3556	0.1084	0.0716	0.1032	-0.0265	0.1311	-0.1185	0.1443	0.09956		0.0025	0.0079	0.0031	0.0071	0.0004	0.0079	0.009	0.0075	0.0094	0.011	0.00488		-27.6172	0.1603	-28.3419	0.1502	-25.8173	0.161	-27.9754	0.1861	-24.6289	0.1831	-26.8761
	GLU-231	33.068	0.1708	33.3529	0.1205	32.752	0.1917	37.1989	0.1886	32.3651	0.1706	33.7474		-0.5067	0.1177	-0.1769	0.1193	-0.1041	0.1002	-0.1636	0.125	-0.1689	0.1469	-0.22404		-0.0063	0.0069	0.0003	0.0054	0.01	0.0068	0.008	0.0077	0.0012	0.0074	0.00264		32.5551	0.2118	33.1734	0.164	32.6408	0.2112	37.0524	0.2169	32.2065	0.224	33.5256
	LEU-232	1.1024	0.0103	1.14	0.0072	0.9328	0.006	1.0541	0.0081	0.7852	0.0063	1.0029		-0.1932	0.0119	-0.1957	0.014	-0.0975	0.0099	-0.0646	0.0088	-0.0674	0.0153	-0.12368		-0.0128	0.0145	0.0042	0.0131	-0.0057	0.0131	0.0015	0.0154	0.0563	0.0212	0.0087		0.8973	0.0195	0.9475	0.0195	0.8288	0.0154	0.991	0.0189	0.7754	0.0265	0.888
	ILE-233	0.95	0.0188	0.7646	0.0184	0.3899	0.0176	-0.0084	0.0116	-0.1486	0.0045	0.3895		-0.2784	0.0111	-0.2573	0.0094	-0.0414	0.0076	-0.0185	0.0041	-0.01	0.017	-0.12112		0.0018	0.0148	0.0052	0.0146	-0.0045	0.0122	0.0009	0.021	0.023	0.019	0.00528		0.6735	0.0243	0.5114	0.0212	0.3432	0.0208	-0.0268	0.0231	-0.1355	0.0245	0.27316
	GLY-234	0.0074	0.0176	-0.1347	0.0162	-0.1776	0.0122	-0.3695	0.0089	-0.5584	0.0059	-0.24656		-0.004	0.015	0.0299	0.0151	0.0462	0.0167	0.0225	0.0178	0.0286	0.0214	0.02464		0.019	0.0093	0.0321	0.0109	0.0017	0.0096	-0.0163	0.0096	0.0004	0.0054	0.00738		0.0222	0.0243	-0.0735	0.0218	-0.1297	0.0205	-0.3642	0.0211	-0.5293	0.0232	-0.2149
	VAL-235	-0.254	0.0102	-0.267	0.009	-0.1463	0.0065	0.0076	0.0052	-0.0715	0.0049	-0.14624		0.0658	0.0069	0.0662	0.0054	0.0249	0.0058	0.0092	0.0052	0.019	0.0131	0.03702		-0.014	0.0172	-0.0156	0.0131	0.0045	0.0109	0.0227	0.011	-0.0034	0.0156	-0.00116		-0.2028	0.0191	-0.2165	0.0157	-0.1165	0.0142	0.0393	0.0131	-0.0564	0.0199	-0.11058
	SER-236	-0.1925	0.0066	-0.2315	0.0077	0.01	0.0127	0.0374	0.0101	0.2797	0.0074	-0.01938		0.0102	0.0311	0.0103	0.0285	0.033	0.0296	-0.0038	0.0301	-0.0807	0.0359	-0.0062		0.0043	0.0037	-0.0025	0.0031	-0.0018	0.0031	0.0055	0.0062	0.0005	0.005	0.0012		-0.1763	0.0315	-0.2233	0.0276	0.0399	0.0323	0.0394	0.0318	0.1999	0.0376	-0.02408
	PRO-237	0.0241	0.0052	-0.1051	0.0051	-0.0216	0.0042	-0.0363	0.0051	0.0601	0.0037	-0.01576		-0.0226	0.0064	-0.0021	0.0063	-0.0078	0.0076	-0.0049	0.0078	-0.0141	0.0054	-0.0103		0.0267	0.0146	0.0037	0.0129	-0.0056	0.0112	-0.0008	0.015	-0.0278	0.0191	-0.00076		0.0285	0.0168	-0.1032	0.015	-0.0353	0.0143	-0.0422	0.0182	0.0181	0.0209	-0.02682
	ARG-238	-23.338	0.0832	-23.3363	0.0723	-21.9683	0.0585	-22.1216	0.0582	-20.0107	0.0689	-22.155		0.1883	0.0478	0.2117	0.0529	0.0004	0.0489	0.0165	0.051	-0.1119	0.0473	0.061		0	0.0078	0.0172	0.0122	0.0161	0.0064	0.0053	0.0088	0.0162	0.0096	0.01096		-23.1553	0.0967	-23.1087	0.0892	-21.9497	0.0778	-22.1033	0.0777	-20.1077	0.0822	-22.0849
	LYS-239	-27.9566	0.1071	-27.607	0.0924	-26.0846	0.1068	-26.1832	0.0963	-23.9994	0.0847	-26.3662		0.4107	0.1144	0.6104	0.111	-0.0391	0.1131	0.2767	0.1178	-0.3048	0.1328	0.19078		0.0092	0.0087	0.0079	0.01	0.0148	0.0112	0.0137	0.011	0.009	0.0138	0.01092		-27.5404	0.15	-26.9894	0.1397	-26.1083	0.1513	-25.8918	0.1715	-24.2998	0.1543	-26.1659
	LEU-240	0.1167	0.0069	-0.0835	0.0063	0.0001	0.0057	0.0065	0.0061	0.2001	0.0063	0.04798		-0.0265	0.0045	0.0126	0.0038	0.0004	0.0037	-0.0018	0.0039	-0.0227	0.0029	-0.0076		0.0141	0.0153	-0.0102	0.0153	-0.0047	0.0131	0.0141	0.0162	0.0065	0.0246	0.00396		0.1037	0.0168	-0.0816	0.0191	-0.0047	0.0141	0.0183	0.0174	0.1837	0.0242	0.04388
	SER-241	0.0254	0.014	-0.1816	0.0131	-0.123	0.0102	-0.1308	0.0106	0.0626	0.0087	-0.06948		0.0009	0.0268	0.0802	0.028	0.0243	0.0324	-0.0393	0.0246	-0.0164	0.0167	0.00994		-0.0173	0.0098	0.0042	0.008	0.0122	0.0049	0.0062	0.0085	-0.0004	0.0077	0.00098		0.0096	0.0307	-0.0951	0.0307	-0.0871	0.0349	-0.1628	0.0286	0.0464	0.0204	-0.0578
	ASN-242	-0.113	0.0171	-0.0472	0.0117	0.228	0.015	-0.0257	0.0156	0.0332	0.0073	0.01506		-0.0338	0.0408	0.0573	0.0463	0.0391	0.0455	-0.0222	0.0511	-0.0698	0.0507	-0.00588		0.0181	0.0074	0.0292	0.0089	-0.0088	0.0061	0.0156	0.0077	-0.0075	0.0125	0.00932		-0.1294	0.0445	0.0417	0.046	0.2594	0.0508	-0.0285	0.0529	-0.0413	0.0526	0.02038
	ILE-243	0.0997	0.009	-0.1574	0.0082	-0.0822	0.0057	-0.0398	0.0067	0.2523	0.008	0.01452		-0.002	0.0122	0.0498	0.0107	0.0085	0.0049	0.0064	0.0123	-0.0577	0.0148	0.001		-0.0123	0.0144	-0.0118	0.0134	-0.0055	0.0133	-0.0239	0.0139	-0.0208	0.0151	-0.01486		0.0852	0.0202	-0.1195	0.0193	-0.0785	0.0165	-0.0572	0.0194	0.174	0.0234	0.0008
	ILE-244	0.084	0.0089	-0.1263	0.0073	-0.0517	0.0047	-0.0359	0.0064	0.2071	0.0097	0.01544		0.0492	0.0178	0.032	0.0164	0.022	0.0085	0.0233	0.017	-0.0509	0.0179	0.01512		-0.0298	0.0187	0.0107	0.0189	0.0154	0.0093	-0.0093	0.0166	0.0193	0.0202	0.00126		0.1029	0.0262	-0.0826	0.0245	-0.0139	0.0135	-0.0218	0.0242	0.1759	0.0269	0.0321
	GLN-245	0.0424	0.0283	-0.395	0.0212	-0.0685	0.0195	0.0168	0.0183	-0.0864	0.0129	-0.09814		-0.0491	0.0508	0.0924	0.0403	-0.0548	0.0515	0.0398	0.0503	-0.1357	0.0477	-0.02148		-0.006	0.0097	0.0203	0.0102	-0.0073	0.0055	-0.0055	0.0089	0.0026	0.01	0.00082		-0.0129	0.0601	-0.2819	0.0442	-0.1301	0.0539	0.0518	0.0566	-0.2202	0.0476	-0.11866
	LEU-246	0.2342	0.0069	0.1775	0.0052	-0.127	0.0063	-0.0212	0.0074	-0.0381	0.01	0.04508		-0.0304	0.0177	0.0027	0.0113	0.0306	0.0148	0.0099	0.016	-0.0653	0.0367	-0.0105		0.0043	0.0082	-0.0097	0.0076	0.0075	0.0124	0.0016	0.0083	-0.0066	0.0189	-0.00058		0.2074	0.0195	0.1698	0.014	-0.0896	0.0191	-0.0093	0.0212	-0.1099	0.0413	0.03368
	ALA-247	-0.0248	0.0136	0.3099	0.0068	-0.0645	0.0084	-0.2062	0.0063	0.0594	0.0056	0.01476		-0.0265	0.0239	0.0437	0.0242	0.0012	0.0156	0.0026	0.0239	-0.0087	0.0204	0.00246		-0.0149	0.0055	-0.0006	0.0048	0.007	0.0088	0.0368	0.0116	0.0052	0.0062	0.0067		-0.0649	0.0275	0.3517	0.0235	-0.0564	0.0201	-0.1654	0.0286	0.0563	0.0237	0.02426
	ASP-248	26.9946	0.1026	23.6365	0.1232	22.6747	0.0899	26.7865	0.0967	21.2548	0.0903	24.2694		-0.4971	0.094	-0.2278	0.1033	-0.1207	0.1056	-0.2064	0.09	-0.5004	0.1302	-0.31048		0.0077	0.0079	-0.0073	0.0051	0.0002	0.0036	-0.001	0.0079	0.0057	0.0068	0.00106		26.5065	0.1264	23.398	0.1465	22.5559	0.138	26.5817	0.1379	20.7656	0.153	23.9615
	LYS-249	-0.4722	0.1611	0.854	0.091	-2.5406	0.0962	1.0516	0.1066	-0.9309	0.0597	-0.40762		-0.2569	0.1459	-0.045	0.1303	0.1927	0.1467	-0.0322	0.1476	-0.5675	0.1776	-0.14178		-0.0104	0.0094	-0.009	0.013	0.0034	0.0036	0.0044	0.0091	0.0027	0.01	-0.00178		-0.7352	0.191	0.8018	0.1496	-2.3518	0.1725	1.0225	0.1948	-1.4959	0.1741	-0.55172
RpoA	PHE-249	25.5247	0.4427	23.5238	0.6217	37.151	0.4121	26.0706	0.3146	27.2088	0.4794	27.8958		7.4267	0.5411	10.0905	0.809	-2.5282	0.2252	2.0004	0.2221	6.5952	0.4837	4.71692		-0.1918	0.018	-0.5151	0.0305	-0.0301	0.0159	-0.0414	0.0151	-0.2643	0.0279	-0.20854		32.771	0.3784	33.1097	0.553	34.5755	0.3503	28.011	0.3229	33.5604	0.3683	32.4055
	ASP-250	-22.1532	0.33	-25.3535	0.297	-31.1732	0.3043	-23.1157	0.2629	-28.6029	0.2718	-26.0797		-3.8119	0.2177	-2.2376	0.2102	2.6809	0.178	0.4475	0.1892	-1.9573	0.174	-0.97568		-0.0155	0.0089	-0.0096	0.0081	0.0108	0.0072	0.0004	0.0069	0.0006	0.0069	-0.00266		-25.9919	0.241	-27.5984	0.2438	-28.4829	0.2725	-22.6522	0.2724	-30.5547	0.2364	-27.056
	PRO-251	-0.052	0.0612	-0.0674	0.0768	-0.4672	0.0409	-0.5068	0.0345	-0.4915	0.038	-0.31698		-1.8014	0.0692	-1.4905	0.071	-0.2928	0.028	-0.4275	0.031	-0.5493	0.0391	-0.9123		-0.0019	0.0127	-0.0036	0.0098	0.0117	0.0103	-0.0045	0.0084	-0.0053	0.0106	-0.00072		-1.8615	0.0561	-1.5599	0.0403	-0.7464	0.0357	-0.9384	0.038	-1.0482	0.038	-1.23088
	ILE-252	-1.0293	0.0445	-1.3026	0.0412	-0.6709	0.0309	-0.8177	0.028	-0.7686	0.0256	-0.91782		-0.4059	0.0522	-0.2557	0.0427	-0.3341	0.0334	-0.068	0.0365	-0.1007	0.0314	-0.23288		-0.0325	0.0183	-0.006	0.0163	0.0012	0.019	-0.0358	0.0183	0.0139	0.0159	-0.01184		-1.4659	0.0409	-1.5676	0.0319	-1.0035	0.0314	-0.9218	0.0366	-0.8562	0.0306	-1.163
	LEU-253	-4.6694	0.0436	-4.7548	0.0358	-3.5384	0.0648	-3.29	0.0285	-3.0351	0.0327	-3.85754		2.863	0.0357	2.7385	0.0291	1.1149	0.0422	0.9876	0.0238	1.1314	0.0242	1.76708		-0.0105	0.0189	0.007	0.0196	0.017	0.0192	0.0158	0.0198	0.0392	0.0204	0.0137		-1.8167	0.0352	-2.0089	0.0334	-2.4024	0.0393	-2.2874	0.0317	-1.8637	0.0301	-2.07582
	LEU-254	-12.7519	0.1412	-12.7728	0.1624	-6.7815	0.1317	-7.5945	0.1073	-7.2606	0.1624	-9.43226		4.5131	0.1149	4.3777	0.1175	1.8856	0.1155	1.9466	0.105	0.5599	0.1318	2.65658		-1.0709	0.0221	-1.0854	0.0245	-0.5822	0.0189	-0.7863	0.0167	-1.0062	0.0226	-0.9062		-9.3045	0.1157	-9.4844	0.1228	-5.4811	0.0936	-6.4342	0.1076	-7.7005	0.1501	-7.68094
	ARG-255	-18.5512	0.7728	-3.6394	0.8082	-10.9378	1.0079	5.5413	0.8422	10.9435	0.8473	-3.32872		53.3011	1.0882	42.8357	0.9279	52.4721	1.5031	9.5813	0.8653	14.9318	1.1495	34.6244		-0.9646	0.0303	-0.8795	0.0194	-1.3967	0.044	-0.2915	0.0241	-0.3483	0.04	-0.77612		33.8136	0.501	38.3258	0.3655	40.1012	0.6962	14.8127	0.4903	25.5469	0.6116	30.52
	PRO-256	-5.5818	0.1132	-5.4063	0.1186	-2.0327	0.0949	-6.1559	0.1024	-4.4791	0.0938	-4.73116		-2.4947	0.1108	-2.1469	0.1547	-0.2957	0.0381	1.1417	0.0465	0.0796	0.0491	-0.7432		-0.9652	0.0134	-0.946	0.0139	-0.2056	0.0191	-0.734	0.0145	-0.6053	0.0146	-0.69122		-9.0391	0.1045	-8.496	0.118	-2.532	0.0991	-5.7433	0.0962	-5.0001	0.0866	-6.1621
	VAL-257	4.4884	0.0475	4.5629	0.0462	1.032	0.0446	0.8445	0.0384	1.2365	0.0387	2.43286		-3.5058	0.0529	-3.5401	0.0545	0.4611	0.0408	0.6657	0.0375	-0.2712	0.0572	-1.23806		0.05	0.0171	0.0108	0.016	-0.0618	0.0177	-0.0911	0.0214	-0.0013	0.0228	-0.01868		1.0305	0.0371	1.031	0.0322	1.4321	0.0338	1.4182	0.0378	0.9621	0.0443	1.17478
	ASP-258	-100.535	0.6382	-103.139	0.4221	-27.2375	0.8328	-49.9056	0.7484	-71.8944	0.7275	-70.5424		99.9583	0.6937	102.888	0.604	-1.0968	1.3926	34.9398	1.175	56.9271	1.1123	58.7232		-0.8495	0.0226	-0.8525	0.0232	-0.3178	0.0247	-0.8442	0.0171	-0.9599	0.0175	-0.76478		-1.4426	0.5492	-1.1036	0.5661	-28.6564	0.9176	-15.7682	0.8801	-15.8797	0.6619	-12.5701
	ASP-259	-55.743	0.6789	-62.8082	0.5048	-15.7229	0.5419	-30.2532	0.8331	-33.103	1.0302	-39.5261		62.1553	0.7203	71.0656	0.6624	-7.5855	0.4403	25.7488	1.0338	11.9066	1.3417	32.6582		-1.2924	0.0199	-1.2505	0.0197	-0.0157	0.0148	-0.529	0.0148	-0.428	0.0293	-0.70312		5.1533	0.5549	7.0146	0.5403	-23.3141	0.3695	-5.0951	0.5295	-21.5222	0.5403	-7.5527
	LEU-260	0.9349	0.0388	0.1871	0.0506	0.4206	0.021	0.1588	0.0345	0.312	0.0324	0.40268		-1.0308	0.0387	-1.4754	0.0431	0.1449	0.0232	0.4154	0.0269	-0.2396	0.0281	-0.4371		0.0145	0.0186	-0.0288	0.0194	0.0458	0.0238	0.0209	0.0211	0.0069	0.0216	0.01186		-0.0817	0.0453	-1.3169	0.0643	0.6102	0.0374	0.5956	0.0418	0.0771	0.0331	-0.02314
	GLU-261	-13.8451	0.3894	-15.8495	0.2238	-15.0729	0.2187	-10.9286	0.3995	-14.0987	0.278	-13.959		3.1631	0.1599	1.438	0.1796	0.8472	0.2024	2.2294	0.2003	-0.0278	0.1633	1.52998		-0.0147	0.0141	-0.0051	0.0112	0.0013	0.0125	-0.0014	0.0125	0.0066	0.0113	-0.00266		-10.6805	0.3811	-14.4153	0.2801	-14.2383	0.2852	-8.7025	0.4884	-14.1413	0.2862	-12.4356
	LEU-262	1.3766	0.0305	1.4573	0.0316	0.1469	0.0255	0.2819	0.0342	-0.0004	0.0423	0.65246		-0.4052	0.0333	-0.5739	0.0389	0.6365	0.0323	0.4538	0.0354	0.0513	0.0294	0.0325		0.0094	0.0203	-0.0003	0.0202	-0.0206	0.024	-0.0345	0.0196	0.0101	0.0198	-0.00718		0.9795	0.0474	0.8834	0.0479	0.761	0.0488	0.6999	0.0534	0.0595	0.0385	0.67666
	THR-263	-1.5123	0.0258	-1.2726	0.0305	-0.5445	0.0421	-1.1353	0.0365	-1.3518	0.0343	-1.1633		0.2303	0.0369	0.0964	0.0413	-2.4395	0.0462	-1.931	0.0407	-1.0828	0.038	-1.02532		0.0049	0.0041	-0.0036	0.0051	0.0061	0.0056	0.0077	0.0047	-0.0064	0.0063	0.00174		-1.2788	0.0372	-1.1785	0.0444	-2.978	0.0463	-3.0587	0.0447	-2.4385	0.0511	-2.1865
	VAL-264	-2.9622	0.0514	-2.6391	0.0861	-7.4863	0.137	-9.9279	0.1251	-8.8223	0.1071	-6.36756		0.1747	0.0517	-0.4577	0.0523	-0.656	0.0794	-0.4585	0.0841	-1.2446	0.0649	-0.52842		-0.0091	0.0088	-0.0529	0.0115	-0.4859	0.0185	-0.6878	0.0188	-0.718	0.0184	-0.39074		-2.7939	0.0629	-3.1422	0.101	-8.6233	0.1402	-11.0772	0.1054	-10.7894	0.1328	-7.2852
	ARG-265	10.1536	0.3401	10.8773	0.3849	-57.117	1.1224	-63.3329	1.0002	-52.5485	0.9473	-30.3935		-0.2726	0.1127	0.4897	0.1334	74.9811	1.5194	81.949	1.57	69.246	1.371	45.2786		-0.0123	0.0106	-0.0126	0.012	-1.8617	0.028	-2.0802	0.0374	-1.9964	0.0359	-1.19264		9.848	0.3362	11.3362	0.3928	16.07	0.7454	16.4669	0.9942	14.7306	0.6178	13.6903
	SER-266	-2.6903	0.0339	-2.7338	0.035	-3.4973	0.0631	-3.3822	0.0484	-2.9785	0.0507	-3.05642		0.2797	0.0323	0.2524	0.0369	-0.8762	0.0566	-0.3901	0.0457	-0.213	0.0434	-0.18944		0.0083	0.0086	-0.0034	0.0087	0.0018	0.0076	0.0117	0.0071	0.0031	0.0086	0.0043		-2.4004	0.0391	-2.4826	0.0411	-4.3728	0.0528	-3.7612	0.0519	-3.1918	0.0449	-3.24176
	ALA-267	-5.4361	0.0425	-6.3967	0.0525	-4.1649	0.0685	-4.0241	0.071	-4.5732	0.0343	-4.919		1.3439	0.0429	2.1077	0.045	-0.5461	0.0569	-0.7635	0.0618	-0.2443	0.0397	0.37954		-0.0051	0.013	-0.0354	0.0146	-0.0259	0.0221	-0.0547	0.0183	0.0113	0.0172	-0.02196		-4.0959	0.0371	-4.3265	0.0417	-4.7376	0.0431	-4.8383	0.0407	-4.8051	0.0394	-4.56068
	ASN-268	-12.0988	0.343	-13.7967	0.3584	-25.1908	0.587	-38.5512	0.2532	-25.8827	0.1865	-23.104		6.3465	0.2818	7.1361	0.3636	30.4041	0.7344	42.6972	0.2517	25.2665	0.3064	22.3701		-0.6768	0.0169	-0.7587	0.02	-1.7336	0.0224	-1.866	0.018	-2.0374	0.0224	-1.4145		-6.4215	0.2433	-7.4026	0.2583	3.4708	0.3697	2.2638	0.2382	-2.655	0.3043	-2.1489
	CYS-269	-2.8334	0.0536	-2.9344	0.0445	-16.4735	0.2245	-13.7841	0.1663	-13.1396	0.1777	-9.833		-0.6062	0.0428	-0.4264	0.036	6.478	0.1525	4.8264	0.0925	5.0743	0.0974	3.06922		-0.0165	0.0156	0.0318	0.0165	-0.6027	0.0222	-0.8765	0.017	-0.8785	0.0186	-0.46848		-3.4579	0.0561	-3.3272	0.0515	-10.6104	0.136	-9.8334	0.1287	-8.9484	0.1298	-7.23546
	LEU-270	-4.555	0.0732	-5.5202	0.0813	-8.0645	0.0703	-8.7793	0.0484	-7.4915	0.0357	-6.8821		0.4277	0.0687	1.1546	0.0803	4.2098	0.0571	3.4848	0.0401	2.2805	0.0272	2.31148		-0.0029	0.0262	-0.0278	0.0264	0.0065	0.0215	-0.0469	0.0231	-0.0059	0.0206	-0.0154		-4.1328	0.041	-4.3972	0.0435	-3.8472	0.0401	-5.3372	0.0376	-5.218	0.0308	-4.58648
	LYS-271	-9.0634	1.0051	-33.4269	1.0894	-23.6741	0.9798	-27.2642	1.065	0.5738	0.9293	-18.571		49.9734	1.9255	102.921	1.9861	78.1316	1.4119	88.6992	1.6588	68.7393	1.6851	77.693		-1.9721	0.0271	-2.4373	0.026	-0.8973	0.0238	-0.9296	0.0244	-1.4412	0.026	-1.5355		38.934	1.2891	67.0593	1.2912	53.5868	0.8662	60.4926	0.8716	67.8788	1.0036	57.5903
	ALA-272	-6.8946	0.1274	-7.359	0.1437	-25.9515	0.1569	-23.6215	0.1557	-20.8379	0.1313	-16.9329		-3.9214	0.1405	-3.7071	0.1298	14.8529	0.1929	10.1035	0.1669	7.204	0.1707	4.90638		-1.0374	0.0243	-1.0916	0.0183	-1.1374	0.023	-0.984	0.0192	-1.0619	0.0175	-1.06246		-11.8512	0.1581	-12.1583	0.1265	-12.252	0.1626	-14.4989	0.1161	-14.6947	0.1222	-13.091
	GLU-273	-58.2464	0.8454	-50.5821	0.6237	-128.804	0.7439	-106.019	0.8088	-121.63	1.1589	-93.0563		-1.7535	0.5734	-2.4799	0.5016	35.5982	0.7052	26.0034	0.7504	42.6592	1.1521	20.0055		-0.1605	0.0183	-0.0358	0.0112	-0.2502	0.0124	-0.3403	0.0116	-0.4056	0.0159	-0.23848		-60.1377	0.767	-53.1424	0.4833	-93.4493	0.4073	-80.3437	0.4803	-79.3626	0.4537	-73.2871
	ALA-274	-10.6143	0.2401	-13.4225	0.1691	0.1969	0.113	-2.9872	0.1557	-2.4338	0.1476	-5.85218		8.7677	0.2543	11.7336	0.264	-0.8043	0.134	2.4079	0.0838	1.4093	0.1121	4.70284		-0.3291	0.0217	-0.5159	0.0216	-0.0849	0.0165	-0.1683	0.0158	-0.0923	0.014	-0.2381		-2.1868	0.1281	-2.2079	0.1308	-0.6889	0.0919	-0.7412	0.1071	-1.1219	0.0763	-1.38934
	ILE-275	-1.4103	0.0672	-2.1344	0.0644	-2.3515	0.0753	2.3868	0.0454	2.0037	0.0404	-0.30114		1.8811	0.0611	2.1154	0.0555	2.0274	0.0626	-1.4379	0.0489	-1.6376	0.0342	0.58968		0.0157	0.0188	0.0163	0.0211	-0.0083	0.0154	0.0526	0.018	-0.0273	0.0158	0.0098		0.486	0.0367	-0.0034	0.0471	-0.3289	0.047	0.9999	0.0446	0.3401	0.0375	0.29874
	HIS-276	-23.6278	0.3227	-22.3442	0.2301	-26.01	0.3981	-15.7873	0.3521	-15.8112	0.3541	-20.7161		24.9801	0.4143	23.2756	0.2799	27.2605	0.4409	16.4748	0.525	26.6142	0.439	23.721		-0.8225	0.0227	-0.7353	0.0231	-0.9171	0.0209	-1.1693	0.0206	-1.3231	0.0211	-0.99346		0.5195	0.2488	0.2094	0.2354	0.3362	0.1912	-0.4713	0.2285	9.4627	0.2368	2.0113
	TYR-277	-34.4619	0.3558	-29.4294	0.5563	-11.8376	0.3402	-25.9149	0.5192	-28.7001	0.2023	-26.0688		26.4457	0.2973	21.468	0.4984	12.6451	0.2883	18.3845	0.3561	21.656	0.1907	20.1199		-2.0866	0.0214	-2.0067	0.0243	-1.5307	0.0206	-1.933	0.0255	-2.0179	0.0165	-1.91498		-10.1136	0.2178	-9.9461	0.2388	-0.7367	0.2426	-9.4702	0.2747	-9.057	0.2332	-7.86472
	ILE-278	-0.6799	0.0401	-0.3049	0.0403	-0.836	0.0392	-1.3554	0.0293	-1.2678	0.0264	-0.8888		0.0444	0.0345	-0.1587	0.0313	0.0795	0.0295	0.1786	0.023	0.1405	0.023	0.05686		-0.0343	0.0211	-0.0218	0.0192	-0.0358	0.0222	-0.0757	0.0212	-0.0357	0.0193	-0.04066		-0.6702	0.0287	-0.4835	0.0264	-0.7921	0.0321	-1.2526	0.028	-1.1632	0.0267	-0.87232
	GLY-279	0.9823	0.0466	1.4107	0.0429	1.1091	0.061	0.2016	0.0409	-0.0972	0.0397	0.7213		-1.2434	0.0398	-1.506	0.0321	-1.1706	0.0436	-0.6015	0.0295	-0.4761	0.0297	-0.99952		-0.0002	0.0032	-0.001	0.0031	0.0033	0.0045	0.0005	0.0056	0.0075	0.0054	0.00202		-0.2583	0.0264	-0.0977	0.0245	-0.0574	0.031	-0.4006	0.0246	-0.5658	0.0224	-0.27596
	ASP-280	-113.628	0.5552	-117.377	0.4552	-98.5151	0.896	-83.4709	0.3753	-91.6169	0.3861	-100.922		77.1575	0.4783	75.3935	0.5163	35.0194	0.7999	28.2529	0.3872	33.0461	0.436	49.7739		-0.2408	0.0133	-0.183	0.0083	-0.0064	0.008	-0.0106	0.0109	-0.0174	0.0106	-0.09164		-36.7407	0.5403	-42.144	0.4266	-63.5183	0.5252	-55.2495	0.3716	-58.5932	0.4896	-51.2491
	LEU-281	0.9624	0.0283	1.2666	0.0299	-0.3067	0.0409	-0.546	0.0277	-0.6254	0.0293	0.15018		-1.5037	0.0221	-1.5966	0.022	-0.5247	0.0248	-0.3081	0.0155	-0.3498	0.0146	-0.85658		-0.0102	0.0215	-0.0039	0.0173	0.0101	0.0231	0.042	0.0207	0.0168	0.0241	0.01096		-0.5507	0.0268	-0.3348	0.0237	-0.8194	0.0367	-0.8127	0.0339	-0.9596	0.0335	-0.69544
	VAL-282	1.3636	0.0179	1.4608	0.0182	1.0471	0.0318	0.7439	0.0167	0.7836	0.0184	1.0798		-1.0877	0.0149	-1.1419	0.0128	-0.6585	0.0241	-0.3573	0.0113	-0.4524	0.0113	-0.73956		0.0021	0.0158	0.0108	0.0158	-0.006	0.0138	0.0337	0.0194	0.0132	0.018	0.01076		0.2788	0.0188	0.3292	0.0194	0.3819	0.0201	0.42	0.0225	0.3434	0.0224	0.35066
	GLN-283	2.8442	0.0927	2.7067	0.0995	2.0821	0.166	1.085	0.1332	1.0429	0.1003	1.95218		-4.2854	0.0812	-4.2288	0.0823	-1.8899	0.1156	-0.865	0.1065	-2.7176	0.0656	-2.79734		-0.0043	0.0099	0.0121	0.0086	0.0133	0.0108	0.0188	0.0103	0.0079	0.0123	0.00956		-1.4519	0.0661	-1.5111	0.066	0.2021	0.1264	0.2322	0.1199	-1.6724	0.0846	-0.84022
	ARG-284	57.8309	0.5558	65.0574	0.4205	87.092	0.447	73.4476	0.442	81.5722	0.3112	73		-8.0628	0.2557	-13.1072	0.3133	-9.2858	0.3253	-2.6466	0.1849	-6.4828	0.1929	-7.91704		0.0361	0.0155	0.0138	0.0157	0.0372	0.0191	0.058	0.0186	-0.0407	0.0175	0.02088		49.788	0.3817	51.9742	0.3224	77.8731	0.3147	70.8302	0.3535	75.0507	0.3007	65.1032
	THR-285	0.1024	0.0158	0.0025	0.0223	-0.499	0.0211	-0.2516	0.0203	-0.1179	0.0212	-0.15272		0.1752	0.0317	0.049	0.0304	0.2825	0.0349	0.3558	0.0351	-0.1329	0.0354	0.14592		0.0055	0.0087	-0.0131	0.0102	-0.0059	0.0103	0.0217	0.0112	-0.0137	0.0112	-0.0011		0.2852	0.0308	0.0368	0.0357	-0.2232	0.0403	0.1254	0.042	-0.2641	0.036	-0.00798
	GLU-286	-26.9287	0.1856	-28.3059	0.1826	-37.7407	0.1893	-32.3007	0.24	-34.7436	0.1964	-32.0039		1.5138	0.1481	1.8655	0.1421	0.8953	0.1449	0.9663	0.1461	0.4303	0.1373	1.13424		-0.005	0.0159	-0.0006	0.0159	-0.0247	0.0151	0.0047	0.0138	-0.0185	0.015	-0.00882		-25.4255	0.2273	-26.4461	0.2093	-36.877	0.2383	-31.3204	0.2707	-34.3361	0.2473	-30.881
	VAL-287	0.0553	0.0164	0.0493	0.0183	-1.3561	0.0217	-0.8543	0.0205	-0.7486	0.0252	-0.57088		0.154	0.0274	0.1159	0.0358	0.0527	0.0363	0.0584	0.0296	0.2315	0.0288	0.1225		0.0241	0.0103	-0.0029	0.0098	-0.0073	0.0099	0.0146	0.0104	0	0.0091	0.0057		0.2352	0.0328	0.1611	0.0389	-1.3095	0.0439	-0.7808	0.0362	-0.5176	0.038	-0.44232
	GLU-288	-42.6084	0.3483	-45.1532	0.2745	-65.643	0.3124	-54.5748	0.3099	-62.8328	0.3058	-54.1624		2.7543	0.1435	2.9014	0.1309	2.5726	0.1494	1.908	0.1434	1.5459	0.1186	2.33644		0.0015	0.012	0.0054	0.0124	0.0101	0.0146	0.0443	0.0122	-0.0037	0.0117	0.01152		-39.8407	0.3289	-42.2291	0.2933	-63.0666	0.3273	-52.6086	0.332	-61.2886	0.3094	-51.8067
	LEU-289	-0.3045	0.0276	-0.3877	0.0297	-2.437	0.0501	-1.6194	0.0486	-1.2843	0.0587	-1.20658		-0.1345	0.0145	-0.3063	0.0221	0.0969	0.0142	0.0434	0.0158	0.158	0.0176	-0.0285		0.0101	0.0189	0.0184	0.0206	0.016	0.0197	0.0199	0.0216	-0.0154	0.021	0.0098		-0.4292	0.0323	-0.6773	0.0322	-2.3259	0.0503	-1.5585	0.0478	-1.139	0.0563	-1.22598
	LEU-290	0.7021	0.022	0.9216	0.0257	-0.8109	0.0353	-0.2783	0.0325	0.1202	0.0317	0.13094		-0.1397	0.0206	-0.3425	0.0243	0.0689	0.0224	0.0598	0.022	-0.0777	0.0186	-0.08624		0.0048	0.0199	0.0369	0.0191	-0.0028	0.0209	-0.0436	0.0184	-0.0105	0.0166	-0.00304		0.5688	0.0341	0.6157	0.0332	-0.7434	0.0463	-0.2641	0.0429	0.0318	0.0382	0.04176
	LYS-291	36.4822	0.3901	40.6924	0.4504	64.0558	0.5203	48.651	0.354	56.6215	0.5707	49.3006		-1.0716	0.1563	-0.8713	0.1449	0.9646	0.1569	1.1678	0.149	-0.8491	0.1541	-0.13192		0.0205	0.015	0.0036	0.0113	-0.0281	0.0123	0.0084	0.0131	-0.0199	0.01	-0.0031		35.4376	0.4129	39.8335	0.5071	65.0006	0.5479	49.821	0.3791	55.7491	0.6088	49.1684
	THR-292	0.2549	0.0635	0.5896	0.0938	1.5682	0.13	-0.0901	0.0627	2.5225	0.1056	0.96902		-0.1694	0.0407	-0.1275	0.0459	-1.122	0.0574	-0.5229	0.0675	-1.6593	0.0618	-0.72022		-0.0129	0.0118	0.0361	0.0111	-0.0253	0.0108	0.0136	0.0109	-0.0314	0.011	-0.00398		0.0718	0.0745	0.4981	0.0873	0.4218	0.1225	-0.604	0.0837	0.8265	0.1061	0.24284
	PRO-293	-2.3804	0.1266	-1.2982	0.1609	-0.1725	0.1241	-0.4901	0.1139	0.161	0.1306	-0.83604		0.4048	0.0309	0.6311	0.0698	0.2782	0.0838	0.0223	0.0749	-0.444	0.0961	0.17848		-0.0612	0.0144	-0.3218	0.0318	-0.59	0.0183	-0.5468	0.0194	-0.7428	0.0185	-0.45252		-2.0337	0.1226	-0.9774	0.1549	-0.4737	0.0958	-1.0156	0.0864	-1.0234	0.0798	-1.10476
	ASN-294	-1.8806	0.2969	-1.2086	0.2675	-6.0441	0.3507	-8.1111	0.2997	-6.5994	0.3385	-4.76876		6.1289	0.3996	7.6747	0.4122	22.3977	0.2508	23.1322	0.304	21.4115	0.2624	16.149		-0.5216	0.0328	-0.533	0.0264	-1.5692	0.018	-1.529	0.0154	-1.5248	0.0164	-1.13552		3.7331	0.241	5.9621	0.2517	14.8018	0.2776	13.471	0.2677	13.2997	0.2747	10.2535
	LEU-295	0.7278	0.0359	0.6287	0.03	-0.8359	0.0528	-0.5401	0.0597	-0.6797	0.056	-0.13984		-0.2679	0.0237	-0.1954	0.0229	-0.1674	0.0327	-0.1934	0.0277	-0.195	0.0299	-0.20382		0.0155	0.0206	0.0444	0.0181	0.0129	0.0167	0.0028	0.0164	-0.0234	0.017	0.01044		0.4753	0.0459	0.4784	0.0372	-0.9901	0.0453	-0.7321	0.0517	-0.8954	0.0493	-0.33278
	GLY-296	-0.3048	0.0136	-0.3087	0.009	-0.8476	0.0311	-0.8961	0.033	-1.0074	0.0381	-0.67292		0.1072	0.0142	0.0703	0.0102	0.1153	0.0167	0.0545	0.0142	0.1307	0.0215	0.0956		-0.0059	0.0066	-0.0015	0.0058	0.0004	0.0064	-0.0059	0.0072	0.0064	0.0061	-0.0013		-0.2031	0.0191	-0.2398	0.0152	-0.7326	0.0283	-0.8477	0.0319	-0.8711	0.0347	-0.57886
	LYS-297	19.8174	0.1914	21.2175	0.2008	28.9675	0.352	20.6735	0.4465	21.389	0.3888	22.413		-0.6772	0.1607	-0.59	0.1636	0.7915	0.1653	1.8828	0.1803	-1.005	0.1622	0.08042		0.0143	0.0127	0.0114	0.0133	0.0007	0.0137	-0.0019	0.0115	-0.0095	0.01	0.003		19.1473	0.2491	20.6406	0.2617	29.7483	0.3731	22.5702	0.4606	20.3993	0.4419	22.5011
	LYS-298	14.7362	0.1707	16.39	0.1815	-1.5513	0.9262	-9.3281	0.8851	3.0979	0.4938	4.66894		-0.2534	0.1362	-0.3016	0.1244	8.694	0.9116	9.3467	0.7386	1.3882	0.2663	3.77478		0.0021	0.01	-0.0136	0.0106	-0.0674	0.0141	-0.0347	0.0119	-0.0123	0.0099	-0.02518		14.4941	0.2206	16.0625	0.2208	7.0717	0.6011	-0.0111	0.6122	4.4878	0.3904	8.421
	SER-299	-0.7653	0.0321	-0.9958	0.0227	-2.1889	0.0663	-2.2503	0.0604	-2.3	0.0632	-1.70006		0.4966	0.041	0.6316	0.0353	1.3957	0.0521	1.154	0.051	1.0038	0.0475	0.93634		0.0243	0.0135	-0.003	0.0125	-0.0055	0.0099	-0.0155	0.0083	0.0021	0.0089	0.00048		-0.2461	0.0415	-0.37	0.038	-0.7998	0.0673	-1.1089	0.0653	-1.296	0.0667	-0.76416
	LEU-300	-0.5576	0.0146	-0.6596	0.0131	-0.4374	0.025	-0.5502	0.0211	-0.8075	0.0195	-0.60246		0.2822	0.0088	0.3306	0.0087	0.172	0.0094	0.1372	0.0083	0.1352	0.0086	0.21144		-0.0179	0.0202	-0.0043	0.0179	-0.0466	0.0231	-0.0599	0.02	-0.0083	0.0211	-0.0274		-0.2942	0.0247	-0.3332	0.0221	-0.3121	0.0312	-0.4738	0.0295	-0.6812	0.0281	-0.4189
	THR-301	-0.213	0.0212	-0.195	0.0212	-0.159	0.0418	-0.5034	0.0373	-0.3856	0.0354	-0.2912		-0.0437	0.0534	-0.1658	0.0535	0.4298	0.0599	0.6541	0.0592	-0.2168	0.0584	0.13152		0.0184	0.0099	-0.0035	0.01	-0.0243	0.0092	0.0117	0.0093	0.0149	0.0084	0.00344		-0.2381	0.0508	-0.3644	0.0535	0.2416	0.0714	0.1617	0.0654	-0.5898	0.0637	-0.1578
	GLU-302	-16.502	0.2529	-18.4614	0.2031	-11.6479	0.3339	-8.7485	0.452	-13.627	0.227	-13.7974		1.7142	0.1236	1.1842	0.1049	-6.8593	0.1688	-5.4319	0.1627	-3.2395	0.1187	-2.52646		-0.0039	0.0109	-0.0063	0.0105	-0.0231	0.0122	-0.0124	0.0106	-0.0158	0.0114	-0.0123		-14.7941	0.227	-17.2874	0.1777	-18.5252	0.2775	-14.1967	0.4005	-16.8898	0.2254	-16.3386
	ILE-303	-0.1028	0.0178	-0.1764	0.0155	0.0377	0.0209	-0.0638	0.0191	-0.1633	0.0168	-0.09372		0.1722	0.0112	0.1672	0.0104	0.2583	0.0092	0.2224	0.0083	0.1589	0.0068	0.1958		-0.0234	0.026	0.0012	0.0236	-0.0161	0.0223	-0.0464	0.0195	0	0.0185	-0.01694		0.0459	0.0291	-0.006	0.0257	0.2804	0.0281	0.1127	0.0245	-0.0041	0.0249	0.08578
	LYS-304	23.7577	0.1868	25.6539	0.1567	30.6774	0.1918	24.6857	0.2427	28.7597	0.1669	26.7069		-0.9066	0.133	-0.438	0.1313	1.2357	0.1396	1.6195	0.16	0.1607	0.1458	0.33426		0.0079	0.017	-0.0198	0.016	-0.0261	0.0157	-0.0086	0.0162	-0.007	0.0165	-0.01072		22.8582	0.2179	25.1958	0.1951	31.8784	0.2115	26.2982	0.2711	28.9154	0.202	27.0292
	ASP-305	-17.8522	0.2014	-20.2187	0.1321	-19.3978	0.188	-15.4686	0.255	-18.458	0.1472	-18.2791		1.424	0.1637	1.5872	0.1671	1.1985	0.187	2.0981	0.1916	0.1803	0.1587	1.29762		0.0028	0.01	-0.0018	0.0091	0.0085	0.0101	-0.0058	0.0086	0.0128	0.0083	0.0033		-16.4178	0.2401	-18.6281	0.2081	-18.1881	0.261	-13.3889	0.2979	-18.2653	0.2261	-16.9776
	VAL-306	0.4497	0.0138	0.4113	0.0152	0.1871	0.0126	0.1406	0.015	0.1853	0.0119	0.2748		-0.3443	0.0118	-0.3392	0.0111	0.2149	0.0099	0.2096	0.0105	-0.0072	0.008	-0.05324		0.0054	0.0185	0.0288	0.017	0.0123	0.0168	0.0387	0.0168	0.0159	0.0156	0.02022		0.1104	0.0207	0.1016	0.0217	0.4135	0.0207	0.389	0.0224	0.1929	0.0201	0.24148
	LEU-307	0.276	0.0119	0.2574	0.0118	0.1227	0.0131	0.0772	0.0122	0.0652	0.0122	0.1597		-0.2633	0.0079	-0.2371	0.0081	0.1637	0.0069	0.1571	0.0085	0.0528	0.0093	-0.02536		-0.0254	0.0196	0.0348	0.0202	0.0189	0.023	-0.0201	0.0194	0.0218	0.0194	0.006		-0.0135	0.0225	0.0547	0.0233	0.3059	0.0258	0.213	0.0233	0.1398	0.0226	0.13998
	ALA-308	0.1914	0.0084	0.2011	0.0083	0.0372	0.01	0.0147	0.0111	0.0015	0.0099	0.08918		-0.2035	0.0288	-0.1251	0.0259	0.3797	0.0258	0.3951	0.0292	-0.0205	0.0243	0.08514		0.0062	0.0053	-0.0014	0.0049	0.0029	0.0048	-0.0025	0.0055	-0.0011	0.0048	0.00082		-0.005	0.0296	0.0761	0.0267	0.4185	0.0283	0.4071	0.0307	-0.0217	0.0248	0.175
	SER-309	0.4193	0.018	0.3267	0.0169	0.0443	0.0216	0.0521	0.0208	0.2035	0.0211	0.20918		-0.1541	0.0667	-0.2632	0.0589	0.7308	0.0616	0.7568	0.0704	0.0145	0.0605	0.21696		0.0039	0.0091	-0.0103	0.0067	0.0008	0.0079	0.0004	0.0089	-0.0019	0.0078	-0.00142		0.2669	0.0653	0.0488	0.0597	0.7709	0.0689	0.8078	0.0766	0.2134	0.065	0.42156
	ARG-310	15.7435	0.4809	21.0798	0.2573	20.2118	0.3014	15.8653	0.2863	20.2418	0.2321	18.6284		-0.4649	0.3581	-1.4374	0.1657	1.303	0.1121	0.4748	0.108	-0.5964	0.098	-0.14418		-0.0653	0.0215	-0.0489	0.0206	0.0155	0.0209	-0.0369	0.0189	0.0284	0.0195	-0.02144		15.2341	0.2974	19.5988	0.1821	21.5242	0.2656	16.3004	0.2766	19.6718	0.2123	18.4659
	GLY-311	-0.1259	0.0106	-0.1336	0.0096	-0.3711	0.0106	-0.2635	0.0116	-0.3248	0.0099	-0.24378		-0.0396	0.03	-0.0709	0.0291	0.2145	0.0264	0.2547	0.0288	0.0438	0.028	0.0805		-0.0029	0.0056	-0.0036	0.0048	0.008	0.0064	0.0048	0.0049	-0.0036	0.0067	0.00054		-0.1694	0.0301	-0.2077	0.0289	-0.1498	0.0273	-0.0011	0.0311	-0.2846	0.0299	-0.16252
	LEU-312	0.1762	0.0141	0.1739	0.0156	0.2605	0.0176	0.1841	0.0122	0.1997	0.013	0.19888		-0.0031	0.0196	0.0117	0.0215	-0.0456	0.0201	0.025	0.0234	0.0859	0.0201	0.01478		-0.0076	0.0182	0.0137	0.0189	0.0133	0.0187	-0.0328	0.0223	0.0386	0.0184	0.00504		0.1655	0.0271	0.199	0.0284	0.228	0.0327	0.177	0.0371	0.3255	0.0299	0.219
	SER-313	-0.4028	0.0187	-0.4149	0.0188	-0.601	0.0299	-0.5858	0.0253	-0.4263	0.0246	-0.48616		0.1396	0.0656	0.1401	0.0626	0.475	0.0619	0.5849	0.0662	-0.1316	0.0677	0.2416		-0.0102	0.0109	0.0108	0.0113	-0.0135	0.0109	0.0037	0.0118	-0.0069	0.0112	-0.00322		-0.2748	0.0653	-0.2664	0.0675	-0.1421	0.0696	0.0044	0.0663	-0.5647	0.0758	-0.24872
	LEU-314	0.242	0.0076	0.2756	0.0076	0.2538	0.0129	0.2069	0.0102	0.2333	0.0106	0.24232		-0.0834	0.0313	-0.0995	0.0321	-0.0107	0.0374	0.0837	0.0335	-0.1439	0.0383	-0.05076		-0.014	0.0164	0.0065	0.0204	-0.053	0.022	-0.0422	0.0213	0.0008	0.0227	-0.02038		0.1444	0.0351	0.1829	0.0383	0.1926	0.0447	0.2476	0.0401	0.0904	0.046	0.17158
	GLY-315	0.6499	0.0235	0.7713	0.0221	0.6764	0.0297	0.5761	0.0281	0.5341	0.0291	0.64156		-0.3687	0.0333	-0.5244	0.0348	0.0278	0.032	0.2847	0.0356	-0.1334	0.0295	-0.1428		0.0163	0.0082	-0.0012	0.0091	0.0022	0.0088	0.0184	0.0075	-0.0136	0.0083	0.00442		0.2964	0.0317	0.2456	0.033	0.7063	0.0399	0.878	0.0421	0.3893	0.0371	0.50312
	MET-316	-0.4614	0.0318	-0.3297	0.0389	-0.5373	0.0428	-0.3117	0.0352	-0.404	0.0407	-0.40882		0.1208	0.0323	0.1738	0.0299	0.5133	0.031	0.4434	0.0244	0.1421	0.0248	0.27868		-0.021	0.0141	0.0106	0.0152	0.0217	0.0158	0.0552	0.0171	0.0014	0.0141	0.01358		-0.363	0.0425	-0.1455	0.0453	-0.0043	0.0471	0.1867	0.0416	-0.2571	0.0479	-0.11664
	ARG-317	39.765	0.5408	41.5207	0.4376	52.7766	0.5166	44.43	0.3357	52.6634	0.5031	46.2311		-1.3215	0.127	-1.05	0.1333	-0.3223	0.1357	1.0104	0.0977	-0.974	0.0998	-0.53148		0.0119	0.0125	0.0079	0.0116	0.0087	0.0124	0.0249	0.0129	-0.0202	0.0134	0.00664		38.4459	0.4722	40.4778	0.406	52.4501	0.4491	45.486	0.3231	51.6869	0.494	45.7093
	LEU-318	-1.0415	0.0276	-1.1303	0.0321	-1.0028	0.037	-1.0588	0.031	-1.2981	0.0314	-1.1063		-0.2344	0.0339	-0.2221	0.0326	0.3459	0.0382	0.3626	0.0337	-0.0686	0.0291	0.03668		0.0431	0.0188	-0.0076	0.0204	-0.0121	0.019	0.0281	0.0219	0.0473	0.0181	0.01976		-1.2355	0.0429	-1.3605	0.0383	-0.6679	0.0467	-0.6667	0.0461	-1.32	0.0378	-1.05012
	GLU-319	-34.5225	0.2663	-36.6223	0.3459	-42.1003	0.3502	-35.8358	0.252	-40.5666	0.2202	-37.9295		0.6886	0.1572	0.5556	0.1635	3.0988	0.1949	2.9477	0.1916	0.4789	0.1559	1.55392		-0.0066	0.0086	-0.0086	0.0084	0.0089	0.0086	-0.0017	0.01	0.0071	0.0072	-0.00018		-33.8509	0.2666	-36.0673	0.3694	-39.0042	0.3257	-32.9071	0.2946	-40.0895	0.2649	-36.3838
	ASN-320	-0.5835	0.1611	-0.8731	0.2137	-2.1583	0.1413	-1.0034	0.1501	-1.8819	0.1799	-1.30004		-0.1239	0.1037	-0.0551	0.1243	1.5543	0.1017	1.8165	0.1097	-0.0455	0.1055	0.62926		0.0054	0.0063	-0.0248	0.0128	0.0061	0.0072	-0.0024	0.0066	0.0129	0.0063	-0.00056		-0.7093	0.1693	-0.958	0.21	-0.5916	0.1604	0.8012	0.1868	-1.9312	0.1997	-0.67778
	TRP-321	1.1227	0.1377	0.6852	0.1445	-2.6226	0.2024	-2.5279	0.1063	-4.0115	0.1132	-1.47082		-7.3707	0.1077	-6.7161	0.0965	-0.511	0.1496	-0.6389	0.1058	-0.9076	0.121	-3.22886		-0.2582	0.0122	-0.2527	0.0139	-0.1724	0.0144	-0.2132	0.0125	-0.3404	0.0132	-0.24738		-6.4994	0.096	-6.2834	0.1206	-3.3091	0.1266	-3.3764	0.083	-5.2604	0.0905	-4.94574
	PRO-322	-13.8678	0.2543	-15.6034	0.1731	-8.2151	0.2434	-8.3026	0.1456	-9.5737	0.2025	-11.1125		8.7432	0.1221	9.4575	0.0916	7.9429	0.1735	7.1939	0.0917	8.1145	0.1382	8.2904		-0.8039	0.0251	-1.0597	0.0225	-0.5327	0.0148	-0.6565	0.0126	-0.7809	0.0122	-0.76674		-5.9326	0.2158	-7.2152	0.1538	-0.7993	0.1395	-1.7675	0.1186	-2.2509	0.1294	-3.5931
	PRO-323	-7.5625	0.2117	-7.6497	0.1508	-5.0179	0.1398	-6.7076	0.1029	-7.138	0.1151	-6.81514		3.9224	0.1986	4.0111	0.1686	3.3117	0.1957	5.5005	0.1447	4.4469	0.1727	4.23852		-0.2737	0.0174	-0.2354	0.0134	-0.1412	0.0151	-0.1982	0.0125	-0.1703	0.0129	-0.20376		-3.9234	0.1102	-3.8727	0.0784	-1.8509	0.0896	-1.406	0.1045	-2.8681	0.1127	-2.78422
	ALA-324	-9.129	0.1902	-9.1916	0.1803	-6.5142	0.2077	-9.7651	0.1562	-7.4277	0.1743	-8.40552		3.6841	0.1681	3.8295	0.1704	2.6728	0.2012	5.1445	0.1159	4.8541	0.1501	4.037		-0.4784	0.0175	-0.5288	0.0162	-0.2746	0.0152	-0.3155	0.0118	-0.3501	0.0166	-0.38948		-5.9283	0.1269	-5.8935	0.1285	-4.1191	0.0985	-4.9359	0.1231	-2.9134	0.1481	-4.75804
	SER-325	-7.1246	0.2723	-8.3276	0.2115	-9.9884	0.294	-9.1568	0.2452	-6.9039	0.1639	-8.30026		6.0062	0.2783	5.8857	0.2248	7.3312	0.2595	7.3378	0.2675	2.9133	0.1397	5.89484		-0.3119	0.0199	-0.3346	0.0166	-0.2519	0.0171	-0.2679	0.0198	-0.0842	0.0131	-0.2501		-1.4226	0.1956	-2.7828	0.1417	-2.9202	0.1478	-2.0737	0.1409	-4.0753	0.1198	-2.65492
	ILE-326	-25.5967	0.3319	-27.3864	0.3136	-24.6113	0.2949	-25.6838	0.3043	-33.8901	0.2994	-27.4337		17.7445	0.4133	20.263	0.4341	14.3827	0.3694	18.0237	0.4402	22.3306	0.3463	18.5489		-2.0537	0.032	-2.1324	0.0257	-2.1438	0.0279	-2.0373	0.0315	-2.4407	0.0243	-2.16158		-9.9003	0.2294	-9.2463	0.241	-12.4003	0.2154	-9.7073	0.2525	-13.9975	0.2162	-11.0503
	ALA-327	-22.7684	0.2595	-22.1704	0.2477	-24.4297	0.2127	-22.9598	0.3038	-26.8488	0.3504	-23.8354		16.0183	0.2669	15.1578	0.1742	16.1354	0.1709	15.8742	0.2444	21.7235	0.4111	16.9818		-1.7487	0.019	-1.529	0.0168	-1.5757	0.0123	-1.4966	0.0172	-1.6938	0.0253	-1.60876		-8.5015	0.1854	-8.5341	0.1923	-9.8699	0.1581	-8.5967	0.1857	-6.8418	0.1895	-8.4688
	ASP-328	-122.397	1.0649	-129.953	0.898	-181.139	1.2405	-161.425	1.1161	-186.394	1.4786	-156.262		28.2754	1.1307	30.5009	1.0878	56.9619	1.4676	44.9127	1.1467	64.2287	1.9929	44.9759		-0.2644	0.0187	-0.5456	0.0208	-0.7927	0.0227	-0.5079	0.0215	-0.6198	0.0253	-0.54608		-94.3313	0.7356	-100.007	0.7085	-124.969	0.6818	-117.072	0.732	-122.765	0.8385	-111.829
	GLU-329	-311.155	4.4719	-370.204	2.1122	-463.562	1.6925	-392.385	2.3028	-328.827	2.2181	-373.227		119.786	5.1726	170.219	2.7253	254.242	2.3342	169.956	3.2441	90.5443	2.7708	160.949		-1.4964	0.0788	-2.2425	0.0334	-2.4321	0.031	-1.7596	0.0423	-0.7325	0.0305	-1.73262		-192.957	1.9352	-202.184	1.4264	-211.87	1.23	-224.109	1.5343	-239.09	1.555	-214.042

## Sheet: TPR1
Protein	#Residues	MM_Energy(+/-)dev/error												Polar_Energy(+/-)dev/error												Apolar_Energy(+/-)dev/error												Total_Energy(+/-)dev/error
		Frame1		Frame2		Frame3		Frame4		Frame5		Med		Frame1		Frame2		Frame3		Frame4		Frame5		Med		Frame1		Frame2		Frame3		Frame4		Frame5		Med		Frame1		Frame2		Frame3		Frame4		Frame5		Med
InvF	MET-1	-32.7364	0.2621	-35.1019	0.238	-24.282	0.0778	-20.4639	0.1013	-22.5636	0.0905	-27.0296		-0.3364	0.1246	-0.2286	0.1394	-0.3288	0.1347	-0.8242	0.1488	-0.0227	0.1165	-0.34814		-0.0237	0.0196	-0.0196	0.0153	-0.019	0.0164	0.0184	0.0159	-0.0174	0.0171	-0.01226		-33.1039	0.2774	-35.3521	0.2737	-24.6231	0.1485	-21.2723	0.1883	-22.5985	0.147	-27.39
	LEU-2	-0.2104	0.0053	0.2046	0.0142	0.1276	0.0055	0.014	0.0043	-0.1446	0.0024	-0.00176		-0.08	0.0359	0.0216	0.0135	-0.0295	0.0209	-0.0454	0.0299	0.0444	0.026	-0.01778		0.0165	0.0124	0.0005	0.0098	0.0062	0.0109	0.0155	0.011	0.0101	0.0083	0.00976		-0.2732	0.0388	0.2268	0.0217	0.1039	0.0262	-0.0157	0.0313	-0.0897	0.0278	-0.00958
	ASN-3	-1.2204	0.0326	0.2212	0.0283	0.2844	0.0146	0.3262	0.0088	-0.3455	0.0204	-0.14682		-0.2375	0.0434	0.1213	0.0865	-0.4188	0.0782	-0.3193	0.0798	-0.2412	0.064	-0.2191		-0.0201	0.0092	-0.0405	0.0128	0.0206	0.0106	-0.0043	0.0087	0.0054	0.0125	-0.00778		-1.4752	0.0583	0.2976	0.0962	-0.1155	0.0824	0.0025	0.0813	-0.582	0.0679	-0.37452
	THR-4	0.5267	0.0112	0.1743	0.0263	0.2153	0.0079	0.0703	0.0092	0.3063	0.0066	0.25858		-0.0866	0.0358	-0.0371	0.0578	-0.1919	0.0496	-0.1696	0.0503	-0.0001	0.0315	-0.09706		-0.002	0.0086	-0.0225	0.0112	-0.0041	0.0113	0.0097	0.0109	0.0054	0.0065	-0.0027		0.4373	0.0391	0.1171	0.0611	0.0177	0.0508	-0.0912	0.0524	0.3105	0.0321	0.15828
	GLN-5	-0.1395	0.0219	-0.0037	0.0271	0.1028	0.0138	0.0963	0.012	0.2325	0.011	0.05768		-0.4434	0.0719	0.0328	0.0802	-0.3773	0.0763	-0.1626	0.0417	0.125	0.0739	-0.1651		-0.0051	0.0098	0.0025	0.011	-0.0059	0.0108	-0.0011	0.0103	-0.0079	0.0088	-0.0035		-0.5887	0.0725	0.0255	0.0869	-0.2834	0.0775	-0.0683	0.0469	0.348	0.0752	-0.11338
	GLU-6	27.5789	0.1823	31.4185	0.1904	22.9372	0.0759	22.1928	0.1174	21.5639	0.0852	25.1383		-0.5306	0.1219	0.0477	0.1412	-0.3304	0.1092	-0.6924	0.1462	-0.0573	0.1164	-0.3126		-0.0263	0.013	0.0008	0.0089	-0.0189	0.0096	0.002	0.0122	0.0008	0.0096	-0.00832		27.0425	0.2233	31.4692	0.2351	22.5877	0.1332	21.5019	0.1953	21.5159	0.1498	24.8234
	VAL-7	0.0748	0.0062	0.0955	0.0077	0.0566	0.0043	0.0145	0.0035	0.0425	0.004	0.05678		-0.0344	0.0332	0.1384	0.0396	-0.0919	0.0289	-0.0561	0.0303	-0.0685	0.0314	-0.0225		0.005	0.0118	-0.0148	0.0171	-0.0052	0.0184	-0.0168	0.0146	-0.0286	0.0151	-0.01208		0.0442	0.0356	0.2175	0.0427	-0.0407	0.0324	-0.058	0.0336	-0.0543	0.0342	0.02174
	LEU-8	-0.0905	0.0055	-0.0595	0.0088	-0.0126	0.0053	0.0019	0.0046	0.0255	0.0041	-0.02704		-0.0016	0.0053	0.0079	0.0074	-0.0053	0.006	-0.0065	0.0062	-0.0048	0.0054	-0.00206		-0.0334	0.0213	-0.0094	0.0183	0.0164	0.0225	-0.0028	0.019	-0.0559	0.0262	-0.01702		-0.125	0.0225	-0.0601	0.0212	-0.0029	0.0247	-0.0067	0.0202	-0.0346	0.0269	-0.04586
	LYS-9	-23.5073	0.1392	-26.5694	0.1331	-21.222	0.0754	-20.2306	0.0821	-19.8736	0.0636	-22.2806		-0.2945	0.1556	0.1091	0.1413	-0.3653	0.1447	-0.7219	0.165	-0.2736	0.1217	-0.30924		-0.0044	0.0137	-0.0064	0.0151	0.0088	0.0166	-0.0112	0.0148	-0.0105	0.0144	-0.00474		-23.8094	0.218	-26.4549	0.1933	-21.5815	0.1631	-20.9582	0.1873	-20.1591	0.1292	-22.5926
	GLU-10	25.0562	0.1554	28.6499	0.1636	23.7491	0.0775	22.1914	0.0828	22.1377	0.0765	24.3569		-0.6622	0.1364	0.1466	0.1459	-0.2483	0.1247	-0.5904	0.1372	0.1586	0.116	-0.23914		-0.0067	0.0096	-0.0161	0.0119	0.0126	0.0077	0.0058	0.0107	-0.005	0.0062	-0.00188		24.3824	0.1889	28.78	0.2119	23.518	0.154	21.6098	0.1588	22.2948	0.1487	24.117
	GLY-11	0.2697	0.0085	0.3337	0.0134	0.2062	0.0061	0.1778	0.0071	0.1762	0.0049	0.23272		-0.0545	0.0289	-0.0221	0.0311	-0.1113	0.0198	-0.043	0.0312	-0.0075	0.0257	-0.04768		-0.0108	0.0058	-0.008	0.0065	-0.0048	0.0093	0	0.008	0.0233	0.0095	-6e-05		0.2061	0.0313	0.3027	0.0333	0.0909	0.0233	0.136	0.0315	0.1932	0.0283	0.18578
	GLU-12	29.9361	0.2253	34.891	0.2021	24.3739	0.0697	24.6205	0.1009	24.3387	0.119	27.632		-0.7	0.1605	-0.0856	0.1574	-0.8421	0.136	-0.5713	0.1519	0.2271	0.1532	-0.39438		-0.0152	0.0078	-0.0003	0.0093	0.0148	0.0115	0.0136	0.0098	-0.0034	0.0086	0.0019		29.2195	0.263	34.8054	0.2592	23.5461	0.1616	24.0558	0.1825	24.5569	0.1963	27.2367
	LYS-13	-36.3142	0.3165	-47.0078	0.4465	-32.2488	0.1251	-30.7153	0.1774	-30.4129	0.1231	-35.3398		-0.5232	0.1324	-0.3502	0.126	-0.6518	0.1353	-0.5765	0.1329	0.1238	0.1212	-0.39558		0.0169	0.0256	-0.0416	0.02	0.0283	0.0221	-0.0026	0.0211	-0.0208	0.0168	-0.00396		-36.8014	0.3438	-47.4013	0.4637	-32.8768	0.1896	-31.2879	0.2137	-30.3126	0.1674	-35.736
	ARG-14	-28.8322	0.1939	-34.1066	0.2104	-24.5802	0.093	-23.7594	0.1125	-23.1069	0.0762	-26.8771		-0.0904	0.0476	-0.0253	0.0576	-0.226	0.0546	-0.1537	0.0586	-0.0558	0.0516	-0.11024		-0.0503	0.0176	0.0023	0.0193	0.0044	0.0162	-0.0232	0.0178	0.0338	0.0178	-0.0066		-28.9722	0.2123	-34.1244	0.217	-24.8	0.101	-23.934	0.1228	-23.1353	0.0937	-26.9932
	LYS-15	-43.433	0.4467	-54.1989	0.5036	-32.9242	0.1845	-31.7344	0.1895	-30.0912	0.1802	-38.4763		-0.6812	0.1435	-0.1059	0.1574	-0.5037	0.1388	-0.6101	0.1495	0.1402	0.1374	-0.35214		0.0041	0.0159	0.0408	0.0181	-0.0284	0.0196	-0.0008	0.02	0.0185	0.0168	0.00684		-44.1079	0.4644	-54.2445	0.5399	-33.4428	0.2321	-32.3392	0.2325	-29.945	0.2184	-38.8159
	ILE-16	0.5127	0.015	0.2571	0.0292	0.1452	0.0101	0.1323	0.0111	-0.0119	0.0063	0.20708		0.0018	0.011	0.0026	0.0126	-0.0281	0.0125	0.0038	0.015	0.0039	0.0025	-0.0032		0.0222	0.0135	0.0016	0.0168	-0.011	0.0165	0.0207	0.0142	-0.0475	0.0147	-0.0028		0.5366	0.023	0.2615	0.0362	0.1058	0.0221	0.1585	0.0241	-0.0554	0.0162	0.2014
	ARG-17	-43.576	0.4183	-46.2539	0.5258	-28.293	0.1315	-28.0499	0.1507	-25.5363	0.1246	-34.3418		-0.4815	0.0635	-0.2249	0.0753	-0.3189	0.0674	-0.21	0.0791	-0.0355	0.0718	-0.25416		0.032	0.0157	0.0181	0.0118	-0.0153	0.0109	-0.013	0.0128	0.0054	0.0134	0.00544		-44.0388	0.4313	-46.4423	0.5506	-28.6337	0.1532	-28.2669	0.1772	-25.5666	0.1479	-34.5897
	SER-18	-0.0736	0.0131	-0.0765	0.0205	-0.0788	0.0071	-0.1032	0.0042	-0.0656	0.0073	-0.07954		-0.0347	0.0251	0.008	0.0368	-0.1136	0.0334	-0.1502	0.034	0.0048	0.0165	-0.05714		0.0096	0.0074	-0.0128	0.0069	0.0109	0.0066	0.0252	0.0076	-0.0031	0.0061	0.00596		-0.099	0.0288	-0.0819	0.046	-0.1825	0.0359	-0.2262	0.0355	-0.0631	0.0191	-0.13054
	PRO-19	0.5498	0.0162	0.5394	0.0136	0.34	0.0079	0.3783	0.0071	0.2892	0.0064	0.41934		0.011	0.0213	-0.017	0.0255	-0.0607	0.0204	-0.0407	0.0265	0.035	0.0166	-0.01448		0.013	0.0097	0.0048	0.0103	0.0121	0.0086	0.0074	0.0083	-0.0328	0.0112	0.0009		0.5732	0.0284	0.528	0.0294	0.2915	0.0238	0.3451	0.0296	0.2911	0.0205	0.40578
	GLU-20	31.9475	0.3025	32.7745	0.2548	22.8443	0.0962	23.7272	0.1208	22.4875	0.1169	26.7562		0.3736	0.137	0.1782	0.1471	-0.3281	0.1284	-0.1999	0.1657	0.1551	0.1147	0.03578		0.0223	0.0127	0.0093	0.0154	-0.0371	0.0131	0.0237	0.0163	-0.0229	0.0121	-0.00094		32.345	0.3146	32.9508	0.3026	22.4789	0.1708	23.5443	0.2087	22.6156	0.1545	26.7869
	ALA-21	-0.3743	0.0104	-0.3617	0.008	-0.1758	0.0044	-0.2229	0.0044	-0.1807	0.0037	-0.26308		-0.0663	0.0039	-0.0393	0.0037	-0.0348	0.004	-0.0192	0.0039	-0.0175	0.0016	-0.03542		0.0256	0.014	0.0028	0.0133	-0.028	0.0163	0.0002	0.0126	-0.0119	0.0104	-0.00226		-0.4154	0.0176	-0.3975	0.0162	-0.2392	0.0184	-0.2418	0.0138	-0.2099	0.0113	-0.30076
	TRP-22	-1.3568	0.0262	-1.4781	0.0277	-0.7028	0.011	-0.6489	0.0077	0.4799	0.0075	-0.74134		-0.0365	0.0142	-0.0404	0.015	-0.0815	0.0157	0.0116	0.0156	0.0465	0.0113	-0.02006		0.0094	0.0134	0.006	0.0165	-0.0106	0.0153	-0.0242	0.0133	-0.0103	0.015	-0.00594		-1.3846	0.0338	-1.513	0.0351	-0.7959	0.0238	-0.6622	0.0235	0.5169	0.0189	-0.76776
	PHE-23	-0.0052	0.0071	-0.0362	0.0079	-0.1591	0.0047	-0.143	0.0048	-0.153	0.0049	-0.0993		-0.0228	0.004	-0.022	0.0045	-0.019	0.0041	-0.0095	0.0053	-0.0067	0.0047	-0.016		-0.0187	0.0091	0.0134	0.0111	-0.0159	0.0113	-0.0112	0.0099	-0.0085	0.0102	-0.00818		-0.0467	0.0118	-0.0443	0.0147	-0.1942	0.013	-0.1642	0.0116	-0.1682	0.0118	-0.12352
	ILE-24	-0.0722	0.005	-0.0519	0.007	0.0525	0.0031	0.0341	0.0027	0.0433	0.0033	0.00116		-0.0132	0.0047	-0.0029	0.0033	-0.0078	0.006	-0.0074	0.0046	0.003	0.0023	-0.00566		0.0064	0.0171	0.0308	0.0216	-0.0145	0.0224	0.0204	0.0226	-0.0756	0.0233	-0.0065		-0.0792	0.0182	-0.0237	0.0228	0.0298	0.024	0.0481	0.0231	-0.0295	0.0233	-0.0109
	GLN-25	0.2843	0.0117	0.2485	0.0153	0.0258	0.0094	0.1091	0.0084	-0.0992	0.0135	0.1137		-0.1399	0.048	-0.059	0.0424	-0.1323	0.0493	-0.1065	0.0539	0.1194	0.0423	-0.06366		-0.0053	0.0103	-0.0168	0.011	-0.0025	0.0087	0.0041	0.01	-0.0172	0.0123	-0.00754		0.1391	0.0481	0.1739	0.048	-0.1101	0.0535	0.0048	0.0557	0.0036	0.0453	0.04226
	THR-26	-0.254	0.0108	-0.4329	0.0177	-0.3456	0.0086	-0.3089	0.009	-0.2435	0.0127	-0.31698		-0.107	0.0387	0.0548	0.0383	-0.0798	0.0372	-0.0497	0.0453	-0.1731	0.0394	-0.07096		-0.0117	0.0127	0.0049	0.0153	-0.0232	0.0204	-0.0212	0.0173	-0.0004	0.0131	-0.01032		-0.3749	0.0422	-0.3737	0.0432	-0.45	0.0457	-0.3797	0.0483	-0.4164	0.0428	-0.39894
	CYS-27	-0.2464	0.0057	-0.1774	0.0158	-0.3458	0.0069	-0.2986	0.0099	-0.2219	0.0058	-0.25802		-0.0871	0.0237	-0.0632	0.0262	-0.0435	0.0254	-0.0691	0.0271	0.1209	0.0269	-0.0284		0.0217	0.0128	-0.01	0.0131	-0.0182	0.0102	0.0019	0.009	-0.0042	0.0073	-0.00176		-0.3135	0.0277	-0.2511	0.0345	-0.406	0.0296	-0.3665	0.0316	-0.1049	0.0294	-0.2884
	SER-28	0.1189	0.0098	0.2137	0.0119	0.0661	0.0067	0.1509	0.0095	0.1418	0.0091	0.13828		-0.1679	0.0514	-0.0099	0.0569	-0.2385	0.0454	-0.1597	0.0549	0.1136	0.0536	-0.09248		-0.0018	0.0117	-0.0007	0.0099	-0.0027	0.0091	-0.0102	0.0134	0.0096	0.0112	-0.00116		-0.0467	0.0526	0.2035	0.0574	-0.1766	0.0479	-0.0156	0.0569	0.2659	0.0545	0.0461
	ALA-29	0.0835	0.0095	0.0319	0.0116	-0.0279	0.0055	0.1512	0.0104	0.1676	0.0107	0.08126		-0.0846	0.0363	-0.0489	0.0395	-0.001	0.0159	-0.1372	0.0416	0.0621	0.0387	-0.04192		-0.008	0.0099	0.0185	0.009	0.0087	0.0159	-0.0008	0.0098	-0.0017	0.0103	0.00334		-0.0097	0.0392	0.0006	0.0386	-0.0214	0.0246	0.0152	0.0431	0.2261	0.0415	0.04216
	GLN-30	0.3571	0.0173	0.3643	0.0264	0.4407	0.0194	0.3069	0.0167	0.1874	0.0208	0.33128		-0.2236	0.0731	0.1413	0.0909	-0.3855	0.0732	-0.3409	0.0731	0.034	0.0749	-0.15494		0.0327	0.0147	0.0065	0.0109	-0.0098	0.0143	-0.0024	0.0164	0.0056	0.0102	0.00652		0.1657	0.0787	0.513	0.0982	0.0425	0.0742	-0.0341	0.077	0.227	0.0762	0.18282
	LYS-31	-24.4935	0.1525	-28.093	0.2325	-26.4192	0.1148	-25.7256	0.1403	-27.0691	0.0957	-26.3601		-0.6143	0.1358	-0.2067	0.161	-0.664	0.1185	-0.587	0.1572	0.0686	0.1631	-0.40068		0.0074	0.0134	-0.0232	0.0171	-0.0052	0.0159	-0.0158	0.014	-0.0072	0.0135	-0.0088		-25.1147	0.1991	-28.305	0.2907	-27.0992	0.1523	-26.3295	0.2004	-27.0165	0.1947	-26.773
	LEU-32	0.2974	0.0066	0.4056	0.0095	0.2665	0.0057	0.3119	0.0048	0.3046	0.0055	0.3172		-0.0035	0.0093	0.0075	0.0052	-0.0087	0.0062	-0.0011	0.0099	0.012	0.0059	0.00124		-0.0014	0.0163	0.0439	0.0168	-0.0157	0.0218	0.0192	0.0168	-0.0002	0.0147	0.00916		0.2927	0.0209	0.4568	0.0206	0.2426	0.0238	0.3301	0.0206	0.3165	0.018	0.32774
	HIS-33	0.003	0.0374	0.0157	0.0545	-1.2037	0.0208	0.1889	0.0166	-0.312	0.0204	-0.26162		-0.1616	0.0712	0.0623	0.0722	-0.365	0.0679	-0.1161	0.0558	0.1633	0.0692	-0.08342		0.0015	0.0124	0.0108	0.0138	0.0141	0.0125	-0.0096	0.0171	0.0113	0.0097	0.00562		-0.1622	0.0767	0.0858	0.0953	-1.555	0.0765	0.0647	0.0606	-0.1348	0.0722	-0.3403
	MET-34	0.4245	0.0105	0.673	0.0178	0.265	0.0075	0.3404	0.0084	0.2501	0.0054	0.3906		-0.0098	0.0049	-0.0109	0.0054	-0.0064	0.0056	-0.0051	0.0046	0.0043	0.005	-0.00558		-0.011	0.0127	0.0011	0.0096	0.0038	0.013	0.0204	0.0136	0.0054	0.0112	0.00394		0.4039	0.017	0.663	0.0205	0.2618	0.0162	0.3565	0.0164	0.2596	0.0136	0.38896
	SER-35	-0.0014	0.024	0.312	0.0326	-0.1369	0.0183	0.1736	0.0073	0.0096	0.0117	0.07138		-0.1061	0.0385	-0.0174	0.0235	-0.0553	0.0351	-0.0251	0.0262	-0.0193	0.0249	-0.04464		-0.0004	0.0132	0.0041	0.0083	0.0053	0.0087	0.0008	0.0072	0.0014	0.0061	0.00224		-0.1094	0.0466	0.2986	0.0421	-0.1867	0.0403	0.1488	0.0272	-0.007	0.0294	0.02886
	PHE-36	0.0437	0.006	0.0975	0.0168	0.1856	0.006	0.1586	0.0054	0.1373	0.0038	0.12454		-0.0054	0.004	0.0082	0.0043	-0.012	0.0049	-0.007	0.0041	-0.0069	0.0057	-0.00462		0.0007	0.0156	0.0192	0.0149	0.0198	0.0152	-0.0082	0.015	-0.0197	0.0168	0.00236		0.039	0.0172	0.1247	0.0214	0.1936	0.0177	0.1434	0.0168	0.1106	0.0178	0.12226
	SER-37	-0.0023	0.0122	-0.9186	0.0682	-0.071	0.0111	-0.0344	0.0116	-0.3607	0.0256	-0.2774		-0.0461	0.0153	-0.0463	0.0154	0.0125	0.0153	-0.0224	0.0152	0.069	0.0173	-0.00666		-0.0026	0.0057	0.0105	0.0073	-0.0031	0.0052	-0.004	0.005	0.0095	0.0088	0.00206		-0.0509	0.0219	-0.9564	0.07	-0.0617	0.0189	-0.0595	0.018	-0.2817	0.0314	-0.28204
	GLU-38	61.6818	0.8657	77.6403	1.051	44.7266	0.2321	42.782	0.2912	38.4931	0.2339	53.0648		0.1371	0.1382	0.8177	0.2048	-0.4826	0.1377	-0.701	0.1445	0.0552	0.1225	-0.03472		-0.0095	0.0129	-0.0146	0.0142	-0.0051	0.016	0.0021	0.0129	-0.0047	0.0159	-0.00636		61.8832	0.8678	78.4563	0.9625	44.2443	0.2794	42.0953	0.3416	38.5413	0.2748	53.0441
	SER-39	-1.009	0.0413	-1.3041	0.0623	-0.8954	0.0259	-0.7902	0.024	-0.6126	0.0204	-0.92226		-0.2618	0.0571	0.0389	0.0669	-0.2416	0.0523	-0.2336	0.0572	-0.0125	0.0555	-0.14212		0.0221	0.0112	-0.0021	0.0113	0.0314	0.0098	0.0001	0.0108	-0.019	0.0109	0.0065		-1.2483	0.0651	-1.2655	0.0974	-1.1037	0.0606	-1.024	0.0594	-0.6478	0.0599	-1.05786
	ARG-40	-51.1475	0.5855	-81.8645	2.0173	-48.7191	0.2733	-42.3661	0.3892	-43.4396	0.2412	-53.5074		-0.3594	0.0562	2.8181	0.6825	-0.4857	0.0612	-0.3358	0.0715	0.156	0.065	0.35864		-0.0085	0.0116	-0.0341	0.013	0.0174	0.0101	0.0274	0.0096	0.03	0.0113	0.00644		-51.4976	0.5913	-79.0947	1.616	-49.1919	0.2915	-42.6864	0.3896	-43.2694	0.2578	-53.148
	HIS-41	0.3803	0.0324	1.2489	0.0372	-0.0118	0.025	0.3847	0.0148	0.3379	0.0187	0.468		-0.2982	0.0613	0.1392	0.0716	-0.1195	0.0511	-0.233	0.0525	-0.0489	0.0547	-0.11208		0.029	0.0161	-0.0069	0.0098	-0.0012	0.0115	0.0199	0.011	0.0003	0.0108	0.00822		0.1131	0.0746	1.3801	0.0803	-0.1311	0.0575	0.1679	0.057	0.2887	0.0584	0.36374
	ASN-42	0.4162	0.0258	0.9487	0.0653	-0.6438	0.0261	-0.4433	0.0207	-0.1961	0.0225	0.01634		-0.0715	0.0679	-0.006	0.065	-0.2425	0.0514	-0.0755	0.0435	-0.1624	0.056	-0.11158		0.0043	0.0083	0.0089	0.0079	0.0031	0.0083	0.0128	0.0086	0.017	0.0083	0.00922		0.3482	0.0703	0.9534	0.0875	-0.8834	0.0576	-0.5069	0.0486	-0.3432	0.0619	-0.08638
	GLU-43	34.2773	0.2653	39.8996	0.4421	34.4661	0.1618	30.3528	0.1916	30.8493	0.1094	33.969		-0.5665	0.1478	0.2505	0.1944	-0.7319	0.1309	-0.447	0.1439	-0.0322	0.1203	-0.30542		-0.0035	0.0138	0.0139	0.0132	0.0155	0.0134	0.0211	0.0107	0.0103	0.0096	0.01146		33.7162	0.2965	40.1922	0.4598	33.7522	0.2115	29.9313	0.254	30.8289	0.1535	33.6842
	ASN-44	-0.4877	0.0197	-0.6538	0.0309	0.1076	0.0228	-0.0128	0.0123	-0.3263	0.0235	-0.2746		-0.1234	0.0368	0.058	0.0432	-0.0865	0.0349	-0.0441	0.0279	-0.1079	0.0416	-0.06078		-0.0063	0.0083	0.0128	0.0079	0.009	0.0079	0.0044	0.007	0.0037	0.0097	0.00472		-0.6169	0.0426	-0.5828	0.0559	0.0309	0.0435	-0.0537	0.0302	-0.4276	0.0514	-0.33002
	CYS-45	-0.1602	0.0091	-0.3728	0.0172	-0.1136	0.0161	0.0508	0.0149	0.0234	0.0135	-0.11448		-0.1236	0.0321	0.0748	0.0436	-0.1155	0.0264	-0.1087	0.0337	0.0204	0.0293	-0.05052		0.013	0.0115	-0.0065	0.0124	0.0097	0.0125	-0.0119	0.0126	-0.008	0.0111	-0.00074		-0.2696	0.0368	-0.3056	0.0491	-0.2208	0.0336	-0.0702	0.0392	0.0355	0.035	-0.16614
	LEU-46	-0.306	0.0056	-0.4192	0.0085	-0.2806	0.0051	-0.275	0.0037	-0.2532	0.003	-0.3068		0.0069	0.0157	-0.0114	0.014	-0.0213	0.0106	-0.0392	0.0164	-0.0254	0.0126	-0.01808		0.012	0.017	0.0044	0.015	-0.0283	0.0213	-0.0341	0.0185	-0.0451	0.0157	-0.01822		-0.2882	0.0228	-0.426	0.0234	-0.3307	0.0241	-0.349	0.0258	-0.3244	0.0199	-0.34366
	ILE-47	-0.5402	0.0087	-0.7027	0.0131	-0.6763	0.0079	-0.591	0.0104	-0.5044	0.0071	-0.60292		-0.1141	0.0227	0.0063	0.0248	-0.0283	0.0188	-0.0588	0.0213	-0.0482	0.0227	-0.04862		0.005	0.0122	-0.0175	0.0164	0.0096	0.0109	-0.0176	0.0147	0.0084	0.0137	-0.00242		-0.649	0.0273	-0.7136	0.0313	-0.6947	0.022	-0.6671	0.0271	-0.5445	0.0268	-0.65378
	GLN-48	0.0285	0.0389	-0.2736	0.0278	-0.6899	0.0513	-0.0537	0.0454	0.2477	0.0408	-0.1482		-0.1008	0.0661	0.0945	0.067	-0.1924	0.0672	-0.2361	0.0725	0.1023	0.0756	-0.0665		-0.0092	0.0093	-0.0048	0.0103	0.0007	0.0103	-0.0146	0.0097	0.0378	0.011	0.00198		-0.0796	0.0725	-0.1843	0.0766	-0.8787	0.0862	-0.3026	0.0867	0.3845	0.0893	-0.21214
	GLU-49	24.3781	0.188	27.6995	0.1963	25.0289	0.0857	23.8652	0.0836	23.337	0.0732	24.8617		-0.0442	0.1333	0.3056	0.1328	-0.5971	0.126	-0.3589	0.1373	0.3403	0.1145	-0.07086		0.0004	0.0173	0.0285	0.0146	-0.0112	0.0124	-0.0046	0.0151	-0.027	0.0187	-0.00278		24.3344	0.2375	28.0431	0.2287	24.4249	0.1556	23.5073	0.151	23.6482	0.136	24.7916
	GLY-50	0.0104	0.0038	0.0376	0.006	0.127	0.0045	0.1333	0.0038	0.189	0.0037	0.09946		0.0027	0.003	0.0018	0.0024	-0.0001	0.0026	-0.0043	0.0022	-0.0127	0.01	-0.00252		0.0117	0.0055	0.0094	0.0053	0.0044	0.0045	0.0002	0.0046	-0.0016	0.0062	0.00482		0.0251	0.0073	0.0487	0.0089	0.1313	0.0065	0.129	0.0059	0.1747	0.0128	0.10176
	ALA-51	0.0171	0.0072	-0.0561	0.0124	-0.1647	0.0054	-0.1378	0.0054	-0.1452	0.0046	-0.09734		-0.0137	0.0027	-0.0141	0.0029	-0.0158	0.0051	0.001	0.003	-0.0035	0.0022	-0.00922		0.0198	0.0086	-0.0005	0.0088	0.0106	0.0099	-0.0104	0.0083	-0.0149	0.01	0.00092		0.023	0.0109	-0.0716	0.015	-0.1703	0.0122	-0.1471	0.0099	-0.1638	0.0113	-0.10596
	LEU-52	0.3052	0.0086	0.4139	0.0144	0.3568	0.0062	0.3401	0.0057	0.3408	0.0047	0.35136		0.01	0.0049	0.0316	0.0043	-0.0151	0.0054	-0.03	0.0053	-0.0131	0.0044	-0.00332		0.0213	0.0159	0.0139	0.0152	-0.0281	0.0141	-0.0022	0.0173	-0.0641	0.0143	-0.01184		0.3365	0.0171	0.4594	0.0206	0.3141	0.0154	0.308	0.0191	0.2637	0.0149	0.33634
	LEU-53	-0.1155	0.0092	-0.2783	0.0198	-0.2841	0.0058	-0.1976	0.005	-0.2277	0.0032	-0.22064		-0.0099	0.0137	-0.0324	0.0134	-0.0219	0.0142	0.0011	0.0127	0.0434	0.0061	-0.00394		0.0213	0.0128	0.0013	0.0143	-0.0144	0.0145	-0.0222	0.0161	-0.0281	0.0137	-0.00842		-0.1044	0.0201	-0.3082	0.0277	-0.3208	0.02	-0.219	0.0192	-0.2128	0.0143	-0.23304
	PHE-54	0.966	0.0337	0.4258	0.0522	-0.3237	0.019	-0.0849	0.0179	-0.271	0.0153	0.14244		-0.0686	0.0216	0.0411	0.025	-0.0891	0.0214	-0.0866	0.023	0.0747	0.0248	-0.0257		0.0141	0.0149	-0.0041	0.0143	-0.0056	0.0159	0	0.0145	-0.0217	0.0168	-0.00346		0.9111	0.0433	0.4601	0.0587	-0.418	0.0327	-0.1705	0.0326	-0.2199	0.0327	0.11256
	CYS-55	-1.6024	0.0357	-2.2799	0.05	-1.2723	0.0181	-1.1287	0.0164	-0.8474	0.0168	-1.42614		0.0068	0.0057	-0.0384	0.0077	0.0188	0.0062	0.0342	0.0065	0.0351	0.0058	0.0113		0.0203	0.0086	0.0014	0.0085	-0.0026	0.0079	-0.0127	0.0083	0.0023	0.0069	0.00174		-1.5771	0.0379	-2.3148	0.0512	-1.2568	0.0214	-1.108	0.0187	-0.8121	0.0179	-1.41376
	GLU-56	60.1357	0.8592	63.4428	0.8039	37.4433	0.2174	37.9916	0.2668	34.0549	0.2252	46.6137		0.1673	0.1572	0.9387	0.1809	-0.4669	0.1403	-0.3096	0.1424	0.0729	0.1498	0.08048		0.0029	0.0104	0.0046	0.0139	0.0063	0.0123	0.0022	0.0123	-0.0153	0.0118	0.00014		60.3393	0.8874	64.3952	0.8232	36.9933	0.2644	37.6845	0.2815	34.0964	0.2878	46.7017
	GLN-57	-1.8645	0.0789	-1.6916	0.1223	-0.4516	0.0324	-0.6839	0.0464	-0.5578	0.0201	-1.04988		-0.3487	0.0665	0.0379	0.0762	-0.3512	0.0688	-0.2714	0.0737	0.0295	0.0635	-0.18078		0.0177	0.0127	0.0045	0.015	0.0112	0.0139	-0.0042	0.0155	0.008	0.0107	0.00744		-2.193	0.1118	-1.6501	0.1442	-0.7885	0.0798	-0.9622	0.0885	-0.5148	0.067	-1.22172
	ALA-58	-0.543	0.0152	-0.9784	0.0323	-0.566	0.0116	-0.5617	0.0154	-0.4688	0.0068	-0.62358		-0.0381	0.0064	-0.0257	0.0074	-0.0056	0.0042	-0.002	0.0063	0.0011	0.0035	-0.01406		0.0081	0.012	0.0037	0.009	0.0003	0.0087	-0.0013	0.0072	-0.009	0.0099	0.00036		-0.5725	0.0198	-1.0009	0.0336	-0.571	0.0153	-0.5642	0.0182	-0.4762	0.0123	-0.63696
	VAL-59	-0.1958	0.01	-0.2349	0.0168	0.0004	0.0072	-0.0034	0.0048	0.0694	0.003	-0.07286		-0.0307	0.0097	-0.0145	0.01	-0.0201	0.0088	-0.0246	0.0096	0.0026	0.0114	-0.01746		-0.0013	0.0187	-0.0244	0.0187	0.0182	0.0186	0.0101	0.0207	-0.0172	0.0174	-0.00292		-0.2276	0.0237	-0.2739	0.0268	-0.001	0.0218	-0.018	0.023	0.0551	0.0193	-0.09308
	VAL-60	-0.1019	0.0074	-0.1048	0.0122	-0.1544	0.0057	-0.1061	0.0046	-0.0869	0.004	-0.11082		-0.0118	0.0041	-0.0074	0.004	0.0115	0.0068	-0.0045	0.0051	-0.0043	0.0043	-0.0033		0.0175	0.02	0.0145	0.0152	0.0027	0.0173	-0.0169	0.0212	0.0156	0.0186	0.00668		-0.0959	0.0231	-0.0976	0.0191	-0.1414	0.0185	-0.1258	0.0229	-0.0756	0.0186	-0.10726
	ALA-61	-0.0822	0.0056	-0.1376	0.0081	0.0617	0.0041	0.0321	0.0036	0.021	0.0036	-0.021		-0.0229	0.0092	-0.0044	0.0068	-0.0186	0.0102	-0.0095	0.0104	0.0139	0.0078	-0.0083		-0.0095	0.0141	-0.0066	0.0107	-0.0257	0.0112	-0.0181	0.0119	-0.0076	0.0099	-0.0135		-0.1137	0.0176	-0.1484	0.0136	0.017	0.0156	0.0052	0.0155	0.0275	0.0135	-0.04248
	PRO-62	-0.0675	0.0063	-0.1346	0.0113	-0.0893	0.0053	-0.097	0.0062	-0.1423	0.0056	-0.10614		-0.0024	0.0155	-0.0223	0.0158	-0.0387	0.0148	-0.0501	0.0173	0.0138	0.0147	-0.01994		-0.0112	0.0105	-0.0111	0.0121	-0.0118	0.0083	0.004	0.0099	0.0283	0.0093	-0.00036		-0.0819	0.0217	-0.1672	0.0234	-0.1384	0.0168	-0.143	0.0206	-0.0993	0.0169	-0.12596
	VAL-63	-0.0535	0.0049	-0.1424	0.008	-0.0784	0.0046	-0.0243	0.0056	0.0087	0.005	-0.05798		-0.0113	0.0079	0.0293	0.0132	-0.0084	0.0046	-0.011	0.0097	-0.0339	0.0176	-0.00706		-0.0145	0.012	-0.0034	0.0148	-0.0034	0.0125	0.0005	0.0144	0.0153	0.0135	-0.0011		-0.0797	0.015	-0.1163	0.0198	-0.0893	0.0141	-0.0354	0.0189	-0.0093	0.0228	-0.066
	SER-64	-0.2416	0.0121	-0.4111	0.0175	-0.2888	0.0103	-0.1639	0.0122	-0.0758	0.013	-0.23624		-0.3096	0.0554	0.0156	0.0724	-0.2086	0.0455	-0.395	0.0682	0.1576	0.0762	-0.148		-0.0008	0.011	-0.0075	0.0095	0.0071	0.0126	0.0073	0.0122	-0.005	0.0101	0.00022		-0.5499	0.0579	-0.3991	0.0746	-0.4877	0.0485	-0.5523	0.0696	0.0774	0.0789	-0.38232
	GLY-65	0.2037	0.0063	0.2496	0.0063	0.1627	0.0048	0.167	0.0055	0.2204	0.0064	0.20068		0.0015	0.0098	0.0199	0.0126	-0.0081	0.0064	0.005	0.0088	0.0118	0.0073	0.00602		-0.004	0.0079	-0.0191	0.0086	0.0003	0.006	0.0091	0.0083	0.0067	0.0062	-0.0014		0.2014	0.0141	0.2501	0.0172	0.1549	0.0099	0.1814	0.0135	0.2391	0.0114	0.20538
	ASP-66	24.3157	0.1542	27.6556	0.1618	22.2024	0.0584	21.6803	0.0936	21.486	0.0643	23.468		-0.1938	0.116	0.0955	0.1313	-0.3116	0.1012	-0.3682	0.1259	0.0666	0.1149	-0.1423		0.0048	0.0102	-0.0067	0.0111	-0.0005	0.0149	0.0094	0.011	-0.0407	0.0117	-0.00674		24.1316	0.1924	27.747	0.2051	21.8861	0.1211	21.3217	0.1539	21.5104	0.1282	23.3194
	LEU-67	-0.0619	0.007	-0.0844	0.009	-0.1273	0.0053	-0.1114	0.0052	-0.1257	0.0041	-0.10214		-0.007	0.0021	-0.0066	0.0031	-0.002	0.0017	-0.003	0.0022	-0.004	0.0023	-0.00452		0.0056	0.0193	-0.0212	0.0181	-0.0197	0.0216	-0.0099	0.0216	-0.0654	0.0209	-0.02212		-0.0629	0.021	-0.1119	0.0205	-0.15	0.0232	-0.124	0.0229	-0.1948	0.0212	-0.12872
	VAL-68	0.1499	0.0059	0.2039	0.0082	0.153	0.0045	0.1459	0.0039	0.1464	0.0038	0.15982		0.0201	0.002	0.0095	0.0028	0.0087	0.0018	0.0055	0.0019	0.0055	0.0023	0.00986		0.029	0.0149	-0.0149	0.0153	0.0034	0.0114	0.019	0.0126	-0.017	0.0106	0.0039		0.1995	0.0159	0.1981	0.0178	0.164	0.0125	0.1711	0.0135	0.1354	0.0115	0.17362
	PHE-69	-0.454	0.0075	-0.4486	0.0079	-0.2862	0.0034	-0.2648	0.003	-0.2373	0.0033	-0.33818		-0.0143	0.0075	-0.0155	0.0077	-0.0261	0.0086	-0.0105	0.0092	-0.0016	0.0025	-0.0136		0.021	0.0132	-0.0191	0.0137	-0.003	0.0118	-0.0207	0.0122	-0.0155	0.0107	-0.00746		-0.4462	0.0159	-0.4835	0.0173	-0.3141	0.0141	-0.296	0.0148	-0.255	0.0111	-0.35896
	ARG-70	-24.9321	0.1765	-26.9914	0.1492	-21.7277	0.0618	-21.5936	0.0928	-21.4041	0.0708	-23.3298		-0.4067	0.0514	-0.1579	0.05	-0.2548	0.0515	-0.2488	0.0524	-0.0726	0.0456	-0.22816		0.0055	0.0073	0.0095	0.0098	-0.0024	0.0078	-0.0057	0.0069	-0.0104	0.0074	-0.0007		-25.329	0.1899	-27.1433	0.1486	-21.9877	0.0765	-21.8507	0.1037	-21.4899	0.0794	-23.5601
	PRO-71	-0.4668	0.0085	-0.571	0.0065	-0.377	0.0029	-0.3556	0.003	-0.3113	0.0025	-0.41634		-0.0551	0.0116	-0.0415	0.0134	-0.0334	0.011	0.0012	0.0037	-0.048	0.0097	-0.03536		-0.0051	0.0119	-0.0177	0.0184	-0.0137	0.0167	0.0187	0.0146	0.0023	0.0117	-0.0031		-0.5262	0.0191	-0.6306	0.0228	-0.4237	0.0211	-0.336	0.0158	-0.3565	0.0143	-0.4546
	LEU-72	0.249	0.0066	0.1891	0.009	-0.0008	0.0047	0.0285	0.0044	0.0238	0.0044	0.09792		0.008	0.0045	0.0168	0.0076	0.0006	0.0045	0.0051	0.0029	-0.0108	0.0032	0.00394		0.0151	0.0113	-0.006	0.0163	0.0124	0.0142	-0.0024	0.0144	-0.0062	0.015	0.00258		0.2723	0.0141	0.2007	0.0189	0.0125	0.0148	0.0308	0.0164	0.0058	0.0167	0.10442
	LYS-73	-24.8033	0.2056	-27.2634	0.2192	-19.601	0.0705	-19.7488	0.0956	-19.6374	0.0871	-22.2108		-0.8892	0.1471	-0.156	0.1377	-0.561	0.1454	-0.4622	0.1372	0.1713	0.1526	-0.37942		-0.063	0.0239	-0.0426	0.0156	-0.0144	0.0192	0.0416	0.0147	-0.0082	0.0152	-0.01732		-25.7476	0.2632	-27.4763	0.2629	-20.1786	0.1626	-20.1701	0.1648	-19.4703	0.1659	-22.6086
	ILE-74	0.1577	0.0137	0.2639	0.0186	0.3619	0.0086	0.3322	0.009	0.4051	0.0079	0.30416		0.2728	0.0184	0.2183	0.0182	0.2247	0.0259	0.2179	0.0283	0.0771	0.0188	0.20216		0.0578	0.0159	0.0447	0.0151	-0.0455	0.0197	-0.0236	0.0164	0.0134	0.0167	0.00936		0.4889	0.0269	0.5277	0.0303	0.5414	0.0296	0.5276	0.0314	0.4959	0.0249	0.5163
	GLU-75	26.6411	0.2553	28.3556	0.2476	20.2216	0.1054	21.1503	0.1327	20.5665	0.1436	23.387		1.3797	0.1056	1.3204	0.1214	1.1102	0.109	0.9261	0.109	1.0015	0.1118	1.14758		0.0422	0.0162	0.0104	0.0179	-0.0052	0.0194	-0.0356	0.0176	-0.0193	0.0134	-0.0015		28.0592	0.2807	29.705	0.2704	21.3266	0.1462	22.0298	0.1741	21.5435	0.1823	24.5328
	VAL-76	-0.3993	0.0092	-0.219	0.0141	-0.0226	0.0097	-0.0377	0.0094	0.0507	0.0097	-0.12558		0.3477	0.0081	0.2239	0.011	0.2	0.0093	0.2102	0.01	0.2454	0.0139	0.24544		-0.0158	0.0151	0.0381	0.0156	0.003	0.0145	-0.0122	0.013	-0.0303	0.0133	-0.00344		-0.0683	0.018	0.0425	0.0217	0.1823	0.0191	0.1605	0.0177	0.267	0.0194	0.1168
	LEU-77	-0.1947	0.0147	-0.0408	0.0227	0.3036	0.0134	0.2335	0.0107	0.3363	0.0118	0.12758		0.4608	0.0112	0.3017	0.0093	0.2545	0.0114	0.2401	0.009	0.2788	0.0089	0.30718		0.0276	0.0165	-0.0319	0.0178	0.0027	0.0167	-0.0015	0.0177	-0.0063	0.0151	-0.00188		0.2936	0.0209	0.2287	0.0257	0.5606	0.0194	0.473	0.0205	0.6086	0.0171	0.4329
	SER-78	-1.1576	0.0394	0.5262	0.031	0.2338	0.037	0.0633	0.0311	0.1824	0.0336	-0.03038		0.9276	0.0289	0.6229	0.0334	0.5289	0.0315	0.4633	0.0466	0.6523	0.0566	0.639		0.0148	0.0174	-0.0099	0.0085	-0.0211	0.0142	-0.0299	0.016	-0.0096	0.0086	-0.01114		-0.2143	0.0417	1.1374	0.0432	0.7399	0.0439	0.4924	0.0546	0.8248	0.0648	0.59604
	LYS-79	-20.8623	0.2435	-22.1176	0.2012	-16.1998	0.0945	-17.0667	0.1228	-17.1795	0.0945	-18.6852		-2.6729	0.1378	-1.2532	0.1384	-2.3216	0.1302	-2.1585	0.1198	-1.9005	0.1478	-2.06134		0.0033	0.0145	0.0315	0.0157	0.0139	0.0206	-0.0042	0.0194	0.0269	0.0198	0.01428		-23.5312	0.2786	-23.3338	0.2224	-18.5063	0.141	-19.224	0.1558	-19.0549	0.1624	-20.73
	LEU-80	-0.5777	0.0167	-0.3619	0.0176	0.0648	0.0161	0.2427	0.0154	-0.3198	0.0186	-0.19038		0.437	0.0136	0.185	0.0103	-0.0051	0.0093	-0.0295	0.0107	0.5399	0.0121	0.22546		-0.0098	0.0102	-0.0081	0.0107	-0.0418	0.0127	0.0256	0.0121	-0.0187	0.0137	-0.01056		-0.1504	0.0151	-0.1841	0.0196	0.0177	0.0188	0.2394	0.0191	0.2026	0.0177	0.02504
	LEU-81	-0.7659	0.0246	-0.3927	0.0344	-0.278	0.0618	0.0391	0.045	-0.1361	0.0333	-0.30672		0.9486	0.0347	0.5596	0.0314	0.7077	0.0705	0.6681	0.0483	0.7213	0.0309	0.72106		0.0354	0.0171	0.0379	0.0179	-0.0266	0.0198	-0.0185	0.0186	-0.0359	0.023	-0.00154		0.2168	0.0277	0.2042	0.0321	0.4029	0.0395	0.6903	0.0314	0.5503	0.0386	0.4129
	ALA-82	-2.4843	0.045	-1.1962	0.0378	-1.2273	0.0548	-1.7586	0.0607	-2.226	0.0438	-1.77848		2.3762	0.0897	0.6012	0.0361	0.7771	0.0547	1.4428	0.0695	2.2871	0.0521	1.49688		-0.0602	0.0131	0.0001	0.0097	-0.2075	0.0139	-0.2961	0.015	-0.0211	0.0118	-0.11696		-0.1634	0.061	-0.5942	0.037	-0.6548	0.0384	-0.6097	0.0488	0.0407	0.0365	-0.39628
	PHE-83	-0.7547	0.028	-0.279	0.024	-0.1377	0.0232	-0.1484	0.0297	-1.4308	0.0429	-0.55012		-0.0499	0.0213	-0.1841	0.0173	-0.3938	0.0264	-0.4264	0.0296	0.2919	0.0351	-0.15246		0.0147	0.0107	0.0019	0.0115	0.0082	0.0126	-0.0121	0.0144	-0.0173	0.0137	-0.00092		-0.7917	0.0292	-0.46	0.029	-0.5228	0.0351	-0.5875	0.0423	-1.1586	0.0402	-0.70412
	ILE-84	0.8356	0.0209	0.9141	0.0235	-0.4774	0.0396	-0.5558	0.0368	-2.3025	0.0498	-0.3172		-1.0075	0.0179	-0.5735	0.0162	-0.1865	0.0274	-0.0077	0.028	1.6645	0.0434	-0.02214		0.0049	0.0146	0.0104	0.0185	-0.0349	0.0205	0.0504	0.0183	0.0716	0.0265	0.02048		-0.1666	0.0279	0.3509	0.0321	-0.6992	0.0449	-0.5115	0.0351	-0.5664	0.0485	-0.31856
	ASP-85	0.2726	0.7587	23.3259	0.8232	57.9294	0.4178	66.7131	0.5259	54.3323	0.6891	40.5147		66.7825	1.3161	33.617	0.9215	-8.9608	0.3783	-17.712	0.5034	-8.3922	0.4905	13.0669		-0.5324	0.0176	-0.2747	0.0168	-0.0328	0.0159	-0.1624	0.0193	-0.1292	0.0132	-0.2263		66.5174	0.8755	56.6784	0.5141	48.9227	0.424	48.8477	0.4364	45.8016	0.3501	53.3536
	GLY-86	-0.4101	0.0595	-0.5546	0.0777	-2.9086	0.1384	-1.5142	0.1396	-6.9882	0.1811	-2.47514		-1.7106	0.0486	-0.6713	0.0417	2.1322	0.1665	1.5257	0.1433	9.7274	0.2168	2.20068		-0.2593	0.0127	-0.2163	0.0133	-0.0413	0.013	-0.0533	0.0117	-0.3774	0.0126	-0.18952		-2.3783	0.0666	-1.4447	0.0852	-0.8137	0.0932	-0.0433	0.079	2.3572	0.1357	-0.46456
	ALA-87	0.8485	0.0255	1.0425	0.037	-4.9339	0.1971	-5.4333	0.2025	-10.1887	0.1873	-3.73298		-0.9122	0.033	-0.4691	0.0341	1.2421	0.158	2.3722	0.1711	4.4719	0.1124	1.34098		-0.0266	0.0154	-0.0311	0.0168	-1.0448	0.0163	-0.9593	0.0224	-1.0388	0.0163	-0.62012		-0.0889	0.0401	0.5448	0.047	-4.7353	0.0946	-4.0223	0.1715	-6.7533	0.1427	-3.011
	GLY-88	-1.9569	0.0468	-1.0057	0.0721	-8.5798	0.2136	-10.3267	0.1905	-11.9812	0.1234	-6.77006		1.2017	0.0445	0.6519	0.0462	8.6412	0.2052	9.67	0.203	12.057	0.1139	6.44436		-0.0077	0.0063	-0.0011	0.0044	-0.9309	0.0166	-0.9459	0.0129	-1.1899	0.0105	-0.6151		-0.7649	0.0299	-0.3547	0.0382	-0.861	0.1167	-1.5993	0.1039	-1.114	0.1082	-0.93878
	LEU-89	-8.5428	0.1936	-7.9663	0.2743	-10.9874	0.1324	-11.5571	0.1327	-11.0547	0.1094	-10.0217		0.6616	0.0643	0.1129	0.0752	7.6687	0.1139	9.0715	0.1146	8.5715	0.1114	5.21724		-1.3182	0.0316	-1.3126	0.0455	-1.2691	0.0188	-1.0745	0.0201	-1.0091	0.0176	-1.1967		-9.1981	0.1984	-9.1601	0.2923	-4.5951	0.1451	-3.5517	0.1314	-3.4857	0.136	-5.99814
	VAL-90	2.9436	0.0964	-0.6263	0.1288	0.1708	0.0709	-0.3615	0.058	-0.4212	0.06	0.34108		-3.4563	0.1205	0.4861	0.1543	-1.1201	0.067	-1.8731	0.0562	-1.6058	0.061	-1.51384		-0.2576	0.0194	-0.1448	0.0172	-0.0205	0.016	0.0391	0.0176	-0.0201	0.0103	-0.08078		-0.7761	0.0659	-0.2882	0.0677	-0.9699	0.0753	-2.1922	0.0549	-2.0477	0.0726	-1.25482
	ASP-91	68.6587	0.587	85.0332	1.087	57.3588	0.6755	50.4064	0.8615	43.9644	0.5213	61.0843		-14.2113	0.4138	-15.7998	0.6555	34.9814	1.0624	32.9212	0.9454	37.9559	0.7056	15.1695		-0.0156	0.0074	-0.1126	0.0149	-0.6975	0.0188	-0.6655	0.0177	-0.7028	0.0159	-0.4388		54.4641	0.4271	69.1133	0.9105	91.696	0.6826	82.6951	1.0201	81.2459	0.5235	75.8429
	THR-92	-15.7695	0.4382	-9.3205	0.3286	-2.2623	0.0732	-1.4736	0.0548	-1.4377	0.0502	-6.05272		12.7787	0.4499	10.0872	0.3579	-0.5784	0.103	-0.5596	0.0836	-0.0062	0.1012	4.34434		-1.2851	0.0325	-0.7996	0.0334	-0.0815	0.0188	0.0046	0.0136	-0.0658	0.013	-0.44548		-4.277	0.1508	-0.0623	0.1728	-2.9297	0.0973	-2.0302	0.0807	-1.5062	0.0984	-2.16108
	THR-93	-3.5241	0.0662	-3.2831	0.0963	-1.6484	0.0519	-1.1486	0.0503	-0.7045	0.0413	-2.06174		1.7376	0.083	1.954	0.0875	-1.9417	0.0726	-1.5269	0.0675	-2.0452	0.0589	-0.36444		0.0161	0.0072	-0.0142	0.0093	-0.0032	0.0049	-0.0066	0.0049	0.0191	0.0059	0.00224		-1.7715	0.0624	-1.3415	0.0978	-3.5914	0.0622	-2.6831	0.0655	-2.7303	0.0477	-2.42356
	TYR-94	-0.0876	0.0552	-0.7728	0.1071	-2.1616	0.06	-0.921	0.0511	-0.5204	0.0248	-0.89268		0.0919	0.0605	0.5896	0.0623	-0.9968	0.0706	-0.7065	0.064	-0.7328	0.0704	-0.35092		0.0151	0.0113	0.0309	0.0147	0.0593	0.0177	-0.0158	0.0163	-0.0379	0.0132	0.01032		0.0167	0.0669	-0.1494	0.1034	-3.0957	0.0847	-1.6405	0.0816	-1.2891	0.0747	-1.2316
	ALA-95	-0.4458	0.0118	-0.8481	0.0478	-0.8328	0.0246	-0.6	0.0286	-0.7123	0.0192	-0.6878		-0.1486	0.0268	0.0454	0.034	-0.0289	0.0271	0.0578	0.0226	0.0946	0.0223	0.00406		0.0164	0.0107	0.0176	0.0107	-0.0263	0.0153	0.0235	0.0159	-0.0196	0.0125	0.00232		-0.5784	0.0303	-0.7837	0.0612	-0.8906	0.0352	-0.517	0.0343	-0.6365	0.0257	-0.68124
	GLU-96	42.5986	0.3788	53.3953	0.8536	46.784	0.2227	42.4917	0.3152	42.726	0.2011	45.5991		-0.5116	0.1301	0.0873	0.1235	-0.7662	0.1193	-0.8769	0.1295	-0.5947	0.0947	-0.53242		0.0101	0.0108	-0.0169	0.0121	0.0248	0.0129	-0.0177	0.0119	-0.02	0.0104	-0.00394		42.0875	0.3992	53.4879	0.8558	46.0403	0.2305	41.6033	0.344	42.111	0.2185	45.066
	SER-97	1.5545	0.0494	2.4794	0.1098	0.9903	0.0401	0.7231	0.0338	0.6679	0.0305	1.28304		-0.1345	0.0496	-0.0161	0.0728	-0.211	0.0526	-0.2025	0.0553	0.0101	0.0469	-0.1108		0.0106	0.0055	0.0026	0.0062	0	0.007	0.0265	0.0074	0.0163	0.0069	0.0112		1.4325	0.0762	2.4624	0.1396	0.7776	0.0656	0.5472	0.0623	0.6938	0.0586	1.1827
	ASP-98	51.3814	0.5986	64.3268	0.8675	45.14	0.1975	41.7236	0.2978	39.7515	0.2094	48.4647		0.4315	0.0765	0.6355	0.1007	-0.0026	0.0792	-0.2799	0.0734	-0.2318	0.0709	0.11054		0.0039	0.0107	0.0157	0.0104	-0.004	0.0122	0.0036	0.0098	-0.0032	0.0124	0.0032		51.814	0.6129	65.0138	0.8324	45.1283	0.2001	41.4349	0.3127	39.5139	0.2091	48.581
	LYS-99	-67.8517	0.9947	-79.9646	1.1693	-54.0857	0.3162	-50.5386	0.3882	-45.4754	0.2964	-59.5832		-1.076	0.1595	-1.3846	0.277	-0.0563	0.152	0.0671	0.1404	0.87	0.1316	-0.31596		-0.0245	0.0188	0.0312	0.0214	-0.0144	0.0171	0.0072	0.0185	-0.0077	0.0188	-0.00164		-68.9315	1.0024	-81.3057	1.0514	-54.1545	0.2878	-50.4655	0.4036	-44.6084	0.2885	-59.8931
	TRP-100	0.2462	0.0204	0.1074	0.037	-0.1996	0.0139	0.1015	0.013	-0.1368	0.0127	0.02374		0.0543	0.0345	0.2685	0.0326	-0.0106	0.0286	-0.1326	0.0313	-0.0884	0.0294	0.01824		-0.0121	0.011	0.0278	0.0131	0.0102	0.0145	-0.0225	0.0143	-0.0022	0.0104	0.00024		0.287	0.0388	0.4029	0.0523	-0.1998	0.033	-0.0531	0.0357	-0.2266	0.0342	0.04208
	VAL-101	-0.2285	0.0072	-0.2628	0.0106	-0.2808	0.0055	-0.2718	0.0045	-0.2972	0.0032	-0.26822		-0.0133	0.0048	-0.0013	0.0052	-0.0083	0.0072	0.0064	0.0048	0.0063	0.0055	-0.00204		-0.0251	0.0141	-0.0322	0.0223	-0.0303	0.0179	0.0041	0.0149	-0.032	0.0158	-0.0231		-0.2667	0.0165	-0.2966	0.0231	-0.32	0.0198	-0.2607	0.0159	-0.3233	0.0172	-0.29346
	LEU-102	-0.1835	0.0069	-0.3196	0.01	-0.1051	0.0059	-0.0624	0.0075	-0.1745	0.0152	-0.16902		0.0343	0.0327	0.096	0.04	-0.0363	0.0285	-0.0524	0.0341	-0.0527	0.0298	-0.00222		-0.0086	0.0152	0.0036	0.0144	-0.0119	0.0185	-0.0374	0.017	-0.0141	0.0141	-0.01368		-0.1573	0.0365	-0.2184	0.0423	-0.1546	0.0358	-0.1514	0.0394	-0.243	0.0348	-0.18494
	LEU-103	-0.0642	0.0046	-0.1034	0.006	-0.082	0.0072	-0.0891	0.005	-0.0658	0.0059	-0.0809		-0.0174	0.0058	-0.0088	0.0078	-0.0092	0.0041	-0.0086	0.0052	0.0027	0.0059	-0.00826		-0.0284	0.016	-0.0093	0.0145	-0.0035	0.0135	-0.0038	0.0133	-0.0112	0.0157	-0.01124		-0.1093	0.0183	-0.1209	0.0182	-0.0947	0.0167	-0.1012	0.0153	-0.0749	0.0173	-0.1002
	SER-104	-0.1069	0.0166	-0.3128	0.0136	-0.3875	0.0098	-0.2824	0.014	-0.1505	0.0075	-0.24802		-0.1192	0.0531	-0.0062	0.0682	-0.1858	0.0448	-0.0908	0.0456	-0.0721	0.0372	-0.09482		-0.0126	0.0081	-0.0033	0.0071	-0.0057	0.0102	-0.021	0.0105	0.0195	0.0102	-0.00462		-0.2358	0.0578	-0.3252	0.0687	-0.5778	0.0497	-0.3947	0.0501	-0.2025	0.0418	-0.3472
	PRO-105	-0.1644	0.0054	-0.2099	0.0072	-0.1816	0.0087	-0.2534	0.0082	-0.1725	0.0058	-0.19636		-0.0393	0.015	-0.0245	0.0135	-0.1	0.026	-0.054	0.0173	-0.0547	0.0177	-0.0545		-0.0256	0.0186	-0.023	0.015	-0.0044	0.0142	0.0119	0.013	-0.0373	0.0186	-0.01568		-0.2292	0.0233	-0.2588	0.0217	-0.2849	0.0324	-0.2948	0.0229	-0.2656	0.0264	-0.26666
	GLU-106	23.0986	0.1517	26.9623	0.2076	23.7576	0.1121	23.0466	0.1341	23.6603	0.1233	24.1051		-0.2268	0.1429	0.4554	0.1192	-0.1547	0.1291	-0.3394	0.1373	0.3909	0.1408	0.02508		-0.007	0.0128	-0.0111	0.0108	-0.0277	0.0103	-0.0115	0.011	0.0133	0.0111	-0.0088		22.8712	0.2135	27.4168	0.2376	23.5734	0.1691	22.6921	0.2004	24.0661	0.1926	24.1239
	PHE-107	-0.0333	0.0181	-0.1026	0.0203	0.0905	0.0107	-0.2886	0.0034	0.1532	0.0045	-0.03616		-0.0519	0.0191	-0.0049	0.0119	-0.1444	0.0336	-0.1085	0.0233	0.0284	0.0171	-0.05626		0.0224	0.0135	0.0027	0.011	0.0252	0.0142	0.0138	0.0137	-0.0289	0.0133	0.00704		-0.0629	0.0312	-0.1062	0.0263	-0.0285	0.0386	-0.3831	0.0253	0.1527	0.0219	-0.0856
	ARG-108	-21.8779	0.1802	-24.9201	0.1844	-18.4329	0.0783	-20.4041	0.1212	-20.6899	0.1121	-21.265		-0.3082	0.0641	-0.1218	0.0659	-0.424	0.0769	-0.1645	0.0725	-0.0145	0.0716	-0.2066		-0.0092	0.0105	0.0107	0.0122	-0.0059	0.0083	-0.0197	0.008	-0.0008	0.0117	-0.00498		-22.2047	0.1938	-25.0328	0.1936	-18.8624	0.111	-20.588	0.1409	-20.7074	0.1313	-21.4791
	ALA-109	0.1072	0.0046	0.0376	0.0053	-0.2598	0.0049	-0.1664	0.0047	-0.2822	0.0045	-0.11272		-0.0206	0.021	-0.0193	0.0184	-0.0553	0.0276	-0.0224	0.0345	0.0706	0.0258	-0.0094		-0.003	0.0092	-0.0067	0.0098	-0.019	0.0098	-0.0108	0.0086	0.0012	0.0084	-0.00766		0.0833	0.0241	0.0111	0.0222	-0.3327	0.0295	-0.1998	0.0349	-0.2097	0.0281	-0.12956
	ILE-110	-0.0236	0.0097	-0.1372	0.0103	-0.2487	0.008	-0.152	0.0076	-0.3076	0.0047	-0.17382		0.051	0.0055	-0.0172	0.0112	-0.0151	0.0103	0.0303	0.007	0.0039	0.0106	0.01058		-0.0317	0.0135	-0.002	0.0143	0.0257	0.0129	-0.0052	0.0114	-0.0182	0.0141	-0.00628		-0.0042	0.0192	-0.157	0.0189	-0.2382	0.0178	-0.1258	0.0151	-0.3205	0.0187	-0.16914
	TRP-111	0.5088	0.0125	0.4001	0.0136	0.1627	0.0085	0.2091	0.0073	0.091	0.0077	0.27434		-0.053	0.0401	0.0938	0.0464	-0.0608	0.0356	-0.0419	0.0253	-0.0061	0.0266	-0.0136		-0.0381	0.0163	-0.0178	0.0158	0.0478	0.0175	0.0112	0.0143	-0.0022	0.0124	0.00018		0.4197	0.0462	0.4719	0.0511	0.1488	0.0395	0.1775	0.0297	0.0835	0.0295	0.26028
	GLN-112	0.2167	0.0208	0.1017	0.0219	-0.0687	0.019	0.1761	0.0108	0.0525	0.0163	0.09566		-0.3965	0.0808	0.0662	0.0931	-0.4873	0.0771	-0.3225	0.0651	0.0804	0.0735	-0.21194		-0.0031	0.0113	-0.0211	0.0109	-0.0248	0.0126	-0.0026	0.0113	0.0168	0.0099	-0.00696		-0.1844	0.0836	0.1488	0.0947	-0.5791	0.0805	-0.1471	0.0677	0.1507	0.0734	-0.12222
	ASP-113	20.3943	0.1488	21.6398	0.1242	17.3275	0.058	17.5148	0.0763	17.4772	0.0705	18.8707		0.0444	0.1068	0.1742	0.1038	-0.152	0.1058	-0.1822	0.1208	0.3015	0.0995	0.03718		-0.0077	0.0072	-0.0136	0.0077	0.0009	0.0073	-0.0032	0.0087	-0.0039	0.0113	-0.0055		20.4385	0.1895	21.8102	0.1552	17.1774	0.1229	17.3267	0.14	17.7758	0.1137	18.9057
	ARG-114	-20.531	0.1674	-21.5603	0.18	-15.7426	0.0898	-16.1899	0.0997	-17.0486	0.0967	-18.2145		-0.7417	0.0698	-0.2828	0.0806	-0.6952	0.0764	-0.6736	0.0755	-0.1696	0.0798	-0.51258		-0.0399	0.0177	0.004	0.0142	0.003	0.0142	-0.0205	0.0133	-0.0018	0.0154	-0.01104		-21.3082	0.1855	-21.8306	0.2048	-16.4332	0.1243	-16.8839	0.1123	-17.2213	0.1164	-18.7354
	LYS-115	-17.5192	0.129	-18.6325	0.1142	-14.379	0.0569	-14.713	0.0738	-15.2218	0.0737	-16.0931		-0.6621	0.1548	-0.2129	0.1426	-0.6275	0.1379	-0.7236	0.1448	-0.6055	0.1205	-0.56632		0.0009	0.0127	-0.0155	0.0141	-0.0106	0.0127	0.0043	0.0144	0.0006	0.0148	-0.00406		-18.1792	0.1997	-18.8651	0.181	-15.0191	0.138	-15.4355	0.1627	-15.8312	0.1283	-16.666
	ARG-116	-19.8583	0.1353	-21.3056	0.1096	-17.3685	0.0531	-17.6628	0.0686	-17.5766	0.0655	-18.7544		-0.4555	0.0649	-0.03	0.075	-0.4277	0.0576	-0.1879	0.0594	-0.0328	0.062	-0.22678		0.0097	0.0106	0.002	0.0102	0.0289	0.0132	0.0005	0.0103	-0.0235	0.0123	0.00352		-20.3062	0.1517	-21.328	0.1289	-17.7653	0.0755	-17.8459	0.0921	-17.6333	0.0881	-18.9757
	CYS-117	0.3816	0.0114	0.441	0.0141	0.5838	0.0079	0.5587	0.0076	0.5646	0.0062	0.50594		0.1731	0.0056	0.1142	0.0128	0.0937	0.0072	0.0754	0.0073	0.0771	0.0043	0.1067		-0.0142	0.0089	-0.0206	0.0128	0.0014	0.012	0.0113	0.01	-0.0122	0.0091	-0.00686		0.5408	0.0159	0.5344	0.0239	0.6785	0.0169	0.6452	0.0141	0.6299	0.0118	0.60576
	GLU-118	19.5706	0.194	20.7651	0.1608	15.7429	0.0842	16.2875	0.1093	16.7842	0.0986	17.8301		1.2992	0.126	0.9736	0.126	1.0387	0.1062	0.7776	0.1157	1.2633	0.1002	1.07048		-0.021	0.0204	0.0114	0.0212	0.0161	0.0179	0.0113	0.0187	-0.0135	0.019	0.00086		20.8458	0.2265	21.7447	0.2231	16.8011	0.125	17.0747	0.1564	18.0361	0.1344	18.9005
	TYR-119	-0.0168	0.0062	0.0606	0.0063	0.2814	0.0056	0.2522	0.0057	0.2283	0.0069	0.16114		-0.099	0.0408	0.0304	0.0383	-0.0968	0.0296	-0.017	0.0364	-0.0617	0.0246	-0.04882		0.0118	0.0139	0.0067	0.0148	-0.0355	0.0147	0.0324	0.0175	0.0012	0.0103	0.00332		-0.1069	0.043	0.0967	0.0439	0.1503	0.0346	0.2659	0.0413	0.1691	0.0281	0.11502
	TRP-120	-0.4131	0.0078	-0.2149	0.0098	-0.0055	0.0076	0.0061	0.0072	-0.2774	0.0071	-0.18096		0.0111	0.027	0.1051	0.0284	-0.0162	0.0333	-0.0104	0.0333	0.0812	0.0196	0.03416		0.0091	0.0147	0.0024	0.0141	-0.0044	0.0124	-0.0073	0.0111	0.0285	0.0142	0.00566		-0.3919	0.0332	-0.1059	0.033	-0.0265	0.0371	-0.0129	0.0337	-0.167	0.0247	-0.14084
	PHE-121	0.3709	0.0064	0.5077	0.011	0.7317	0.0065	0.6931	0.0073	0.6796	0.0085	0.5966		0.0375	0.0085	0.0335	0.0086	-0.0406	0.0053	-0.0564	0.006	-0.0096	0.0067	-0.00712		-0.0234	0.0106	0.0242	0.0133	0.0456	0.0137	-0.0018	0.0121	-0.0051	0.0173	0.0079		0.3849	0.0154	0.5653	0.0182	0.737	0.0165	0.6345	0.0153	0.6655	0.0213	0.59744
	LEU-122	0.1128	0.0069	0.1728	0.0094	0.4265	0.0087	0.3872	0.0096	0.365	0.0107	0.29286		0.0589	0.0071	0.0289	0.0067	0.0041	0.0058	-0.0092	0.0069	0.0745	0.0134	0.03144		-0.0027	0.0168	-0.0238	0.0186	0.0319	0.0183	0.0772	0.0197	-0.0317	0.022	0.01018		0.1691	0.0204	0.178	0.0212	0.4629	0.0189	0.455	0.0226	0.4058	0.0278	0.33416
	GLN-123	0.5778	0.0249	0.0835	0.0425	0.8177	0.0338	0.7636	0.0379	0.8091	0.0387	0.61034		-0.3473	0.0542	-0.1091	0.0573	-0.2614	0.0566	-0.3133	0.0544	-0.148	0.0476	-0.23582		-0.0171	0.0133	0.0128	0.0134	0.0002	0.0131	0.0068	0.0116	0.0132	0.0127	0.00318		0.2136	0.0633	-0.0157	0.0699	0.5571	0.066	0.4576	0.0646	0.6737	0.0598	0.37726
	GLN-124	0.3057	0.016	1.4191	0.0377	2.037	0.0157	2.0097	0.0148	0.0129	0.0147	1.15688		-0.2832	0.0555	-0.0622	0.036	-0.2541	0.0265	-0.1985	0.0269	-0.1426	0.0502	-0.18812		-0.0224	0.0144	-0.0106	0.0094	0.0032	0.0091	0.0016	0.0106	0.0424	0.0146	0.00284		0.0003	0.0571	1.3461	0.0521	1.7868	0.0305	1.8135	0.0316	-0.0899	0.0571	0.97136
	ILE-125	0.431	0.0128	0.5193	0.016	0.9489	0.0167	1.0031	0.0167	1.0295	0.0214	0.78636		0.1242	0.0124	0.068	0.0139	-0.1234	0.0129	-0.1053	0.0137	0.0301	0.0212	-0.00128		0.0047	0.0172	0.0159	0.0201	0.0069	0.0204	-0.0203	0.0181	0.048	0.0212	0.01104		0.5597	0.0246	0.6025	0.0284	0.834	0.0294	0.8767	0.0285	1.1066	0.0383	0.7959
	ILE-126	0.4218	0.0098	0.405	0.0156	0.7885	0.0221	0.8336	0.0139	0.8024	0.021	0.65026		-0.1212	0.0249	-0.037	0.0299	-0.1503	0.0251	-0.1123	0.0247	-0.0374	0.0209	-0.09164		0.0264	0.0186	0.0068	0.0182	0.0176	0.0185	0.014	0.0186	0.039	0.0196	0.02076		0.3287	0.0328	0.375	0.0377	0.6564	0.0371	0.7333	0.0348	0.806	0.0354	0.57988
	THR-127	0.1988	0.0159	0.0285	0.0294	0.3515	0.0214	-0.5434	0.0277	0.0502	0.0378	0.01712		-0.1841	0.0563	0.0171	0.0525	-0.3129	0.0489	-0.1263	0.0462	0.2024	0.0511	-0.08076		0.0011	0.0093	0.007	0.0101	-0.0046	0.0096	-0.0054	0.0093	0.0292	0.01	0.00546		0.0134	0.058	0.0501	0.0584	0.0312	0.057	-0.6749	0.0581	0.2812	0.0635	-0.0598
	PRO-128	-0.1	0.0248	-0.1666	0.0261	-0.5177	0.0364	-0.3962	0.0495	-0.9134	0.0302	-0.41878		-0.2718	0.0249	-0.1363	0.0292	-0.0271	0.0236	0.0218	0.0251	0.0264	0.0224	-0.0774		-0.0125	0.018	-0.0035	0.0139	-0.0137	0.0126	0.0071	0.0125	-0.0047	0.0077	-0.00546		-0.3826	0.0408	-0.3056	0.0406	-0.5584	0.0451	-0.3688	0.0518	-0.893	0.0367	-0.50168
	SER-129	0.427	0.0302	0.6512	0.0351	0.525	0.0294	0.7058	0.0397	0.4181	0.0395	0.54542		-0.0965	0.0393	0.0643	0.0453	-0.1783	0.0384	-0.3892	0.0421	-0.2056	0.0511	-0.16106		-0.0069	0.0081	0.0016	0.0095	0.007	0.0098	0.0087	0.0095	0.0128	0.0088	0.00464		0.3217	0.0499	0.7157	0.0565	0.3547	0.0521	0.3276	0.0534	0.2223	0.0625	0.3884
	PRO-130	0.7505	0.0122	0.872	0.0208	0.9564	0.0129	0.9008	0.011	0.6128	0.0142	0.8185		-0.0985	0.0119	0.0132	0.0134	-0.1635	0.0144	-0.2226	0.011	-0.2963	0.0109	-0.15354		0.007	0.0087	0.0063	0.0112	-0.0092	0.01	-0.0161	0.0091	0.0197	0.0063	0.00154		0.6596	0.0152	0.8919	0.0241	0.7848	0.0162	0.6622	0.0165	0.3368	0.0143	0.66706
	ALA-131	1.0708	0.0199	1.2932	0.0304	0.9158	0.0175	0.8627	0.0185	0.4619	0.0212	0.92088		-0.0668	0.0259	0.0171	0.0306	-0.0991	0.0239	-0.1778	0.0225	-0.0848	0.0284	-0.08228		-0.0332	0.0119	0.0065	0.0217	-0.0233	0.014	0.0004	0.0111	-0.0101	0.0131	-0.01194		0.9708	0.0341	1.3172	0.0439	0.7939	0.0284	0.6846	0.0292	0.3674	0.0347	0.82678
	PHE-132	0.6846	0.0253	0.8206	0.0338	0.5044	0.0258	0.4494	0.0213	0.022	0.0211	0.4962		0.3793	0.0196	0.3716	0.018	0.151	0.0221	-0.0224	0.0148	-0.0499	0.0188	0.16592		0.0159	0.016	0.0254	0.014	-0.0518	0.016	-0.003	0.0173	0.0355	0.0192	0.0044		1.0792	0.0303	1.2161	0.0293	0.6034	0.0258	0.4242	0.0254	0.0078	0.0285	0.66614
	ASN-133	-0.8643	0.0666	-0.3604	0.0897	-2.8325	0.128	-2.3618	0.1758	-3.0287	0.0865	-1.88954		0.5394	0.0757	0.318	0.0584	1.055	0.0928	1.473	0.1128	2.2242	0.0801	1.12192		0.0226	0.0102	0.0027	0.0098	-0.0142	0.0151	-0.0039	0.0118	-0.0243	0.0116	-0.00342		-0.3031	0.0608	-0.0369	0.0798	-1.7819	0.1191	-0.8941	0.132	-0.8251	0.0679	-0.76822
	LYS-134	-39.1809	0.3327	-47.999	0.7093	-48.0712	0.2318	-46.5656	0.2794	-46.3354	0.1925	-45.6304		-0.5656	0.1648	-0.2577	0.1648	-0.4325	0.147	-0.0303	0.1452	0.5339	0.1395	-0.15044		-0.0064	0.0108	0.0222	0.0129	0.0423	0.0173	-0.0125	0.0171	-0.0195	0.0124	0.00522		-39.7602	0.3559	-48.2196	0.6893	-48.454	0.271	-46.5973	0.3014	-45.8131	0.2105	-45.7688
	VAL-135	1.8767	0.0386	2.0069	0.049	0.9629	0.0269	0.8223	0.0262	0.5734	0.0224	1.24844		-0.2559	0.0199	0.0894	0.0206	-0.1187	0.0224	-0.1258	0.0202	-0.2342	0.0153	-0.12904		0.0206	0.0107	0.0453	0.0142	-0.0112	0.0145	0.0073	0.0121	0.0209	0.0113	0.01658		1.6444	0.0366	2.1431	0.0403	0.8335	0.0252	0.7035	0.0263	0.3587	0.0217	1.13664
	LEU-136	-1.2534	0.0845	-0.3977	0.0967	-2.0377	0.0908	-0.6211	0.0536	-0.0094	0.0491	-0.86386		1.8197	0.1143	1.5554	0.0876	2.7434	0.1164	0.2774	0.0439	-0.719	0.0487	1.13538		-0.1379	0.0206	-0.0581	0.0179	-0.1517	0.0206	0.0033	0.0168	-0.0258	0.0209	-0.07404		0.4315	0.0658	1.1008	0.0458	0.5578	0.0999	-0.3419	0.0403	-0.7543	0.0423	0.19878
	ALA-137	3.0469	0.0546	2.5982	0.0903	1.8501	0.0728	1.6493	0.043	1.4542	0.0471	2.11974		-2.5945	0.0659	-0.6641	0.0527	-2.0842	0.0816	-1.3867	0.0296	-1.4913	0.051	-1.64416		-0.0084	0.008	0.008	0.0098	-0.0549	0.0144	0.0291	0.0099	-0.0248	0.0103	-0.0102		0.4448	0.051	1.944	0.0618	-0.2902	0.0707	0.2945	0.0408	-0.0626	0.0336	0.4661
	LEU-138	3.6032	0.0665	3.729	0.0809	1.6572	0.0548	1.3801	0.0439	1.2865	0.0478	2.3312		-1.086	0.0433	-0.4363	0.0417	-0.9456	0.0421	-0.3955	0.0301	-0.4311	0.035	-0.6589		-0.0136	0.0161	0.0374	0.0224	0.0169	0.0164	0.0349	0.0151	-0.0053	0.0125	0.01406		2.5097	0.0728	3.3312	0.0651	0.7291	0.038	1.0212	0.0412	0.8486	0.0383	1.68796
	LEU-139	-1.0491	0.1555	3.1235	0.1196	-1.9149	0.0921	0.5888	0.0452	-0.8267	0.1128	-0.01568		1.085	0.0945	-0.6126	0.0522	0.9691	0.0897	-0.0127	0.0371	0.589	0.0944	0.40356		-0.0103	0.019	-0.0285	0.0194	-0.0298	0.0192	-0.0006	0.0202	-0.0962	0.0233	-0.03308		0.0209	0.0923	2.4845	0.0938	-0.9727	0.0593	0.5763	0.0406	-0.3341	0.0649	0.35498
	ARG-140	-111.216	1.0567	-111.727	2.2455	-130.811	0.8048	-111.449	0.7969	-100.439	0.7745	-113.128		56.5873	0.8329	23.5432	1.5555	62.9919	0.8564	52.8874	0.6245	46.754	0.7382	48.5528		-1.6028	0.0265	-0.6089	0.0335	-1.8697	0.0338	-1.5536	0.0268	-1.0912	0.0282	-1.34524		-56.1487	0.7549	-88.7808	1.2848	-69.686	0.605	-60.1207	0.5922	-54.7684	0.6794	-65.9009
	LYS-141	-165.733	2.3178	-160.06	1.2093	-128.317	1.2575	-113.573	1.248	-114.772	2.1726	-136.491		74.0742	2.6975	100.568	1.9045	75.9812	2.1253	60.6195	2.2995	64.3975	2.6727	75.128		-1.5182	0.0328	-1.982	0.0303	-1.4335	0.0308	-1.3803	0.0322	-1.4659	0.0363	-1.55598		-93.2582	1.4514	-61.4622	1.2978	-53.8014	1.2154	-54.237	1.2934	-51.8521	1.1387	-62.9222
	SER-142	-4.0982	0.142	-4.4075	0.1004	-2.9989	0.0712	-2.7699	0.0601	-3.0885	0.1397	-3.4726		1.73	0.1282	1.0638	0.0534	0.6382	0.0657	0.8601	0.0895	1.8079	0.0983	1.22		-0.058	0.0108	-0.0235	0.0083	-0.0091	0.0081	-0.0297	0.0079	0.0172	0.0101	-0.02062		-2.4254	0.0968	-3.3669	0.0947	-2.3689	0.0732	-1.942	0.0837	-1.2641	0.0819	-2.27346
	GLU-143	76.4622	1.1022	68.493	0.9387	44.0257	0.3728	42.3901	0.3697	41.3107	0.3915	54.5363		-1.923	0.2205	0.7975	0.208	-1.0925	0.1625	-1.2593	0.1937	2.9214	0.1656	-0.11118		-0.0067	0.0112	-0.0272	0.0111	0.0001	0.0121	-0.0232	0.0116	-0.0232	0.0133	-0.01604		74.5413	1.0618	69.3184	0.8927	42.9366	0.3752	41.0915	0.3702	44.2043	0.4128	54.4184
	SER-144	-2.7243	0.0649	-3.2834	0.0597	-2.0464	0.0372	-1.7506	0.0319	-2.6448	0.0459	-2.4899		0.3546	0.0467	0.7107	0.0378	0.5031	0.0457	0.3816	0.0523	1.3187	0.0617	0.65374		-0.0083	0.0182	-0.0103	0.0133	0.0021	0.0195	-0.0307	0.0179	-0.0313	0.0092	-0.0157		-2.3786	0.0704	-2.5807	0.0616	-1.5417	0.0563	-1.3989	0.0611	-1.3577	0.0649	-1.85152
	TYR-145	-26.4292	0.3256	-28.5475	0.3827	-23.8243	0.3801	-25.5428	0.2249	-28.8217	0.3192	-26.6331		19.5414	0.2821	21.6842	0.3398	19.7282	0.3492	19.8797	0.1991	23.0082	0.2912	20.7683		-1.3335	0.0253	-1.458	0.0307	-1.3836	0.0341	-1.4555	0.0268	-1.6331	0.0233	-1.45274		-8.2351	0.2113	-8.3304	0.1974	-5.5005	0.2116	-7.1087	0.1989	-7.4289	0.2024	-7.32072
	TRP-146	-33.6556	0.2175	-31.923	0.2511	-31.21	0.2519	-31.9752	0.2038	-16.7233	0.1664	-29.0974		21.0259	0.1584	20.4336	0.1804	21.4482	0.1833	21.1941	0.1573	9.3468	0.1573	18.6897		-1.5963	0.0172	-1.4	0.0182	-1.5587	0.0213	-1.4568	0.0213	-0.9077	0.0232	-1.3839		-14.2215	0.1692	-12.8968	0.1742	-11.3078	0.1808	-12.2404	0.1703	-8.2811	0.1431	-11.7895
	LEU-147	-4.7784	0.043	-4.649	0.0411	-4.0469	0.0285	-3.7654	0.0306	-4.1885	0.0312	-4.28564		0.5743	0.026	0.2733	0.0285	0.5181	0.0239	0.5166	0.0238	0.8251	0.0224	0.54148		-0.0527	0.0146	0.0402	0.0196	-0.0576	0.019	0.0294	0.0168	-0.0124	0.0129	-0.01062		-4.2558	0.0392	-4.3381	0.0435	-3.5848	0.0295	-3.2195	0.0295	-3.3743	0.0314	-3.7545
	VAL-148	-3.5258	0.0358	-3.301	0.0314	-3.387	0.0325	-3.1335	0.0269	-2.771	0.0294	-3.22366		-0.22	0.0241	-0.6543	0.0234	-0.2535	0.0253	-0.0511	0.0222	-0.4371	0.0214	-0.3232		0.0112	0.0089	-0.0277	0.012	-0.0341	0.014	-0.0624	0.0131	0.0007	0.0131	-0.02246		-3.7329	0.0334	-3.985	0.0283	-3.6725	0.0269	-3.2492	0.0243	-3.2078	0.0321	-3.56948
	GLY-149	-9.4567	0.1315	-8.2863	0.1308	-9.1216	0.1173	-9.3597	0.1234	-7.3317	0.1415	-8.7112		4.6945	0.0998	3.4139	0.09	4.3865	0.1032	4.9577	0.1012	4.2872	0.1253	4.34796		-0.786	0.0099	-0.7139	0.0111	-0.8062	0.0129	-0.7619	0.0102	-0.7938	0.0125	-0.77236		-5.548	0.1165	-5.5802	0.1153	-5.545	0.1133	-5.1702	0.1249	-3.8392	0.133	-5.13652
	TYR-150	-30.5979	0.2104	-30.5385	0.2141	-29.8296	0.2134	-30.1571	0.1992	-29.7999	0.1898	-30.1846		18.6284	0.1676	18.0951	0.1541	18.5633	0.1685	19.1103	0.1755	18.2588	0.1234	18.5312		-1.4078	0.0167	-1.3723	0.0179	-1.3362	0.016	-1.3665	0.0149	-1.3902	0.0152	-1.3746		-13.3679	0.1722	-13.8191	0.1672	-12.5938	0.1612	-12.419	0.17	-12.9238	0.1655	-13.0247
	LEU-151	-4.0536	0.0415	-3.8049	0.0369	-4.404	0.0449	-3.9949	0.0406	-2.865	0.0409	-3.82448		0.6592	0.0242	0.5703	0.0201	1.035	0.0319	0.9148	0.0265	-0.0315	0.025	0.62956		0.0267	0.0221	0.0451	0.0201	-0.0095	0.017	0.0062	0.0176	0.0194	0.0254	0.01758		-3.3678	0.0385	-3.187	0.032	-3.3808	0.0306	-3.0736	0.0303	-2.8756	0.033	-3.17696
	LEU-152	-5.2573	0.0826	-4.8003	0.0717	-5.4967	0.0907	-5.5647	0.0576	-2.8518	0.0574	-4.79416		0.0675	0.038	0.1284	0.0347	0.3066	0.0459	0.2698	0.0393	-1.312	0.0313	-0.10794		-0.3676	0.0139	-0.3303	0.0148	-0.435	0.014	-0.3781	0.0133	-0.1711	0.0144	-0.33642		-5.5559	0.0814	-5.0035	0.0769	-5.6244	0.0778	-5.6748	0.0545	-4.3369	0.0599	-5.2391
	ALA-153	-6.553	0.1476	-5.8784	0.1113	-7.6242	0.1471	-6.7928	0.149	-4.8189	0.1175	-6.33346		0.0415	0.1112	-0.2895	0.08	0.7613	0.1429	0.3004	0.1315	-1.9824	0.0792	-0.23374		-0.7597	0.0166	-0.7552	0.0171	-0.7709	0.016	-0.7859	0.0158	-0.647	0.0129	-0.74374		-7.2723	0.1255	-6.9173	0.1194	-7.6409	0.1222	-7.2858	0.1192	-7.4457	0.0991	-7.3124
	GLN-154	-8.7061	0.2302	-7.0777	0.1997	-11.1437	0.1991	-10.323	0.1927	-9.8356	0.2218	-9.41722		4.3434	0.2757	3.0772	0.2449	8.4089	0.2336	7.7093	0.2221	5.7558	0.2815	5.85892		-0.6302	0.0164	-0.6333	0.0211	-0.7348	0.0191	-0.6188	0.0176	-0.6181	0.0165	-0.64704		-4.986	0.1531	-4.6377	0.15	-3.4687	0.1682	-3.2384	0.1644	-4.7008	0.1652	-4.20632
	SER-155	-0.4147	0.0305	-0.6278	0.0288	-0.9478	0.0648	-0.4042	0.037	1.0383	0.0389	-0.27124		-0.47	0.0288	-0.2875	0.0299	-0.1736	0.0263	-0.5307	0.0267	-0.4934	0.0189	-0.39104		-0.0641	0.0136	-0.0833	0.0122	-0.0347	0.0162	-0.0521	0.0136	0.0197	0.0084	-0.0429		-0.9489	0.0366	-1.0001	0.0405	-1.155	0.0592	-0.9845	0.0375	0.5634	0.0396	-0.70502
	THR-156	1.9415	0.0635	1.2853	0.0532	0.1724	0.0429	1.1385	0.084	1.6241	0.028	1.23236		-0.7077	0.0653	-0.4938	0.0527	-0.383	0.0516	-0.6803	0.0693	0.1422	0.0504	-0.42452		0.0142	0.0095	0.0072	0.01	-0.0307	0.0095	-0.0018	0.0092	0.0118	0.0104	0.00014		1.2471	0.0662	0.7988	0.0615	-0.2426	0.069	0.4571	0.0783	1.7785	0.0555	0.80778
	SER-157	1.0422	0.0497	0.685	0.0477	0.7201	0.0232	0.6714	0.0276	1.1384	0.0249	0.85142		-0.5187	0.0664	0.0031	0.0723	-0.2052	0.0485	-0.1941	0.0482	0.0384	0.0542	-0.1753		-0.0007	0.0091	0.0005	0.0116	0.007	0.0093	0.0069	0.0075	-0.0164	0.0103	-0.00054		0.5197	0.0798	0.6884	0.0943	0.5197	0.0529	0.4846	0.0536	1.1579	0.0535	0.67406
	GLY-158	0.9549	0.0216	0.6535	0.024	0.1903	0.0134	0.2526	0.0158	0.654	0.02	0.54106		-0.5155	0.0241	-0.3878	0.0235	-0.2387	0.0288	-0.2561	0.0373	-0.2879	0.049	-0.3372		0.0134	0.0081	-0.0033	0.0065	0.0001	0.0114	-0.0075	0.0094	-0.0217	0.0072	-0.0038		0.4526	0.0346	0.2629	0.0325	-0.0483	0.0334	-0.0145	0.0403	0.3429	0.0525	0.19912
	ASN-159	-0.2962	0.0305	-0.2782	0.0315	0.4721	0.0327	0.2453	0.0391	-0.4921	0.0319	-0.06982		0.5001	0.0733	0.5409	0.0715	0.4	0.0538	0.2276	0.0578	0.8515	0.069	0.50402		0.0141	0.0116	0.0043	0.0121	-0.0072	0.0085	0.0002	0.0117	0.073	0.0182	0.01688		0.217	0.0784	0.2681	0.0817	0.8646	0.0597	0.4699	0.0699	0.433	0.0784	0.45052
	THR-160	-0.4113	0.0339	-0.4504	0.0361	-0.75	0.0171	-0.7224	0.0144	-0.4468	0.0124	-0.55618		0.1642	0.0494	0.2778	0.0441	0.2258	0.041	0.2487	0.0432	0.7644	0.0497	0.33618		0.0072	0.0084	0.0001	0.0097	0.022	0.0148	0.0076	0.0116	-0.0043	0.0099	0.00652		-0.2402	0.0542	-0.17	0.0564	-0.5006	0.0442	-0.4661	0.0476	0.3118	0.0489	-0.21302
	MET-161	0.1704	0.0578	0.1525	0.0487	0.1815	0.0284	0.0157	0.0353	-0.7115	0.0323	-0.03828		0.03	0.0331	0.218	0.0344	-0.0524	0.0347	-0.0375	0.0328	0.3397	0.0282	0.09956		-0.0026	0.017	-0.0058	0.0182	0.0016	0.0158	-0.0287	0.0165	-0.0188	0.019	-0.01086		0.2002	0.0586	0.368	0.0587	0.1319	0.0425	-0.0499	0.0507	-0.3908	0.0416	0.05188
	ARG-162	-18.5023	0.3484	-12.6002	0.2755	-7.1046	0.1446	-7.7994	0.127	-8.2907	0.1469	-10.8594		-0.1701	0.0735	-0.0436	0.0768	-0.3295	0.0617	-0.0025	0.0647	-0.7645	0.0674	-0.26204		-0.0166	0.0118	-0.0059	0.0134	0.0079	0.0109	-0.0091	0.0137	-0.0169	0.0108	-0.00812		-18.6903	0.3541	-12.6509	0.2806	-7.4234	0.1503	-7.8114	0.1356	-9.0758	0.1515	-11.1304
	MET-163	-0.7101	0.0516	-1.1454	0.0589	-1.6904	0.0379	-1.5101	0.0412	-1.9322	0.0517	-1.39764		0.5336	0.0284	0.6488	0.029	0.4101	0.0256	0.4086	0.0244	1.2948	0.0438	0.65918		0.0135	0.0118	-0.0104	0.0119	0.0022	0.0078	0.0084	0.0078	0.0336	0.0134	0.00946		-0.1615	0.0566	-0.5075	0.0697	-1.2781	0.0424	-1.0946	0.0437	-0.6021	0.0489	-0.72876
	LEU-164	-1.5199	0.0414	-1.9871	0.0399	-1.4934	0.0294	-1.2911	0.0308	-1.9753	0.0296	-1.65336		1.3486	0.0286	1.5598	0.028	0.9738	0.0219	0.8989	0.0246	1.8417	0.0248	1.32456		-0.0733	0.0233	-0.0017	0.0293	-0.1779	0.0313	0.0338	0.0233	-0.0061	0.0206	-0.04504		-0.245	0.0329	-0.4301	0.0376	-0.6991	0.0388	-0.3595	0.0294	-0.1389	0.0285	-0.37452
	GLY-165	0.477	0.0374	0.2002	0.0378	0.2962	0.0261	0.1666	0.0282	-0.0505	0.0317	0.2179		0.2528	0.0228	0.2904	0.0237	0.0787	0.0178	0.1342	0.0193	0.6321	0.03	0.27764		0.0087	0.0087	0.0141	0.0059	-0.0646	0.0116	-0.0217	0.0079	0.01	0.0063	-0.0107		0.7376	0.0238	0.5056	0.027	0.3083	0.0233	0.2805	0.0191	0.5933	0.0184	0.48506
	GLU-166	12.2329	0.3332	8.354	0.5171	0.0189	0.2072	0.4685	0.1736	2.0122	0.2009	4.6173		0.0306	0.1359	1.0129	0.1674	-0.6984	0.137	-0.587	0.1264	1.7209	0.1522	0.2958		-0.0094	0.0099	-0.0553	0.0128	-0.0079	0.0118	0.0051	0.0131	-0.0417	0.0102	-0.02184		12.2209	0.3418	9.3238	0.5008	-0.6727	0.2343	-0.1029	0.2133	3.7024	0.2429	4.8943
	ASP-167	-36.5075	0.6133	-41.9377	0.6383	-41.1682	0.4082	-38.5167	0.4599	-44.3175	0.4738	-40.4895		41.6221	0.6091	44.0177	0.5656	33.9742	0.4962	33.4932	0.5687	43.3437	0.5703	39.2902		-0.4302	0.0104	-0.4832	0.0104	-0.3147	0.0098	-0.338	0.0116	-0.4324	0.0113	-0.3997		4.7154	0.3604	1.6077	0.4365	-7.4846	0.3508	-5.3298	0.3254	-1.4203	0.2998	-1.58232
	TYR-168	-22.6469	0.2591	-25.9453	0.2455	-20.3676	0.2173	-20.5302	0.215	-21.0591	0.352	-22.1098		16.9815	0.1593	19.9511	0.1711	15.2134	0.1781	15.4765	0.1711	15.1308	0.3108	16.5507		-1.1408	0.0133	-1.2963	0.0155	-1.2919	0.0159	-1.252	0.0157	-1.5744	0.0218	-1.31108		-6.7976	0.2123	-7.3009	0.1911	-6.4441	0.1589	-6.3039	0.1709	-7.511	0.2117	-6.8715
	GLY-169	-1.4832	0.0574	-2.5669	0.0934	0.1364	0.0362	-0.1688	0.0423	-1.5472	0.0967	-1.12594		0.5399	0.0347	0.913	0.0347	0.0155	0.019	0.1832	0.0246	1.208	0.0479	0.57192		-0.1536	0.0092	-0.2098	0.009	-0.0496	0.0059	-0.0839	0.0056	-0.1804	0.0104	-0.13546		-1.0948	0.0581	-1.8646	0.089	0.1018	0.0266	-0.0694	0.0287	-0.5144	0.0935	-0.68828
	VAL-170	-2.955	0.1379	0.2326	0.074	-0.6406	0.0379	-0.7153	0.0476	-5.0879	0.1611	-1.83324		-0.8412	0.0847	0.0356	0.0482	0.2079	0.0366	0.3128	0.0445	2.4372	0.1423	0.43046		-0.7565	0.0242	-0.1206	0.0141	-0.0097	0.011	-0.0137	0.0111	-0.5396	0.0316	-0.28802		-4.5459	0.1816	0.1447	0.0986	-0.4423	0.0442	-0.4152	0.0487	-3.204	0.2356	-1.69254
	SER-171	0.3224	0.1622	1.1408	0.0765	-0.3027	0.0399	-0.0622	0.0442	-1.1832	0.1571	-0.01698		-0.1822	0.0675	-0.166	0.0625	-0.1083	0.0469	-0.1586	0.0491	0.8966	0.1467	0.0563		0.0006	0.006	-0.0182	0.009	0.0033	0.0044	-0.0058	0.0047	-0.0002	0.008	-0.00406		0.1486	0.1447	0.9573	0.0912	-0.4041	0.0588	-0.2251	0.0648	-0.2954	0.1124	0.03626
	TYR-172	-1.57	0.0994	-0.9541	0.0755	0.216	0.0294	0.4464	0.0275	-0.7974	0.0408	-0.53182		0.4951	0.0639	0.3828	0.0528	-0.0839	0.0531	-0.1203	0.0513	0.5289	0.0418	0.24052		-0.0103	0.0096	-0.0072	0.0112	-0.0242	0.0125	-0.0265	0.0108	0.0085	0.0101	-0.01194		-1.0869	0.0887	-0.583	0.0754	0.1075	0.0591	0.2984	0.0569	-0.2615	0.0526	-0.3051
	THR-173	-1.0873	0.0559	-0.609	0.0652	0.3873	0.0293	0.4323	0.0246	-0.5127	0.0339	-0.27788		-0.0528	0.0397	0.3076	0.0585	-0.1678	0.0464	-0.2218	0.0429	0.266	0.0446	0.02624		0.0034	0.0081	-0.0064	0.0081	0.0104	0.0097	-0.0216	0.0101	-0.0052	0.0095	-0.00388		-1.1369	0.0774	-0.3142	0.0896	0.2274	0.0559	0.1877	0.0497	-0.2526	0.0577	-0.25772
	HIS-174	-13.8196	0.2236	-13.2542	0.2237	-1.7425	0.109	-1.6744	0.1086	-3.8426	0.1172	-6.86666		7.0106	0.1862	9.3625	0.2276	0.8897	0.0714	0.4778	0.0794	0.2536	0.0655	3.59884		-0.0394	0.0096	-0.0587	0.0107	0.0142	0.0084	0.0165	0.0076	0.0095	0.0134	-0.01158		-6.8544	0.1503	-3.9642	0.1447	-0.8409	0.0803	-1.1801	0.0717	-3.5825	0.1282	-3.28442
	PHE-175	-2.5767	0.0495	-1.751	0.0535	-1.0006	0.0443	-1.3178	0.0426	-1.6504	0.0345	-1.6593		0.9433	0.0236	0.911	0.0256	0.6676	0.021	0.7304	0.0214	0.3208	0.0205	0.71462		-0.009	0.0121	0.025	0.0123	0.0003	0.0138	0.0106	0.0147	0.0052	0.0109	0.00642		-1.6415	0.037	-0.8115	0.0437	-0.333	0.0334	-0.5758	0.0324	-1.3239	0.0322	-0.93714
	ARG-176	-29.9758	0.3757	-29.2867	0.4577	-14.8801	0.1464	-14.8835	0.1068	-15.5063	0.1724	-20.9065		0.3084	0.0755	1.2795	0.084	-0.357	0.074	0.1259	0.0766	-1.3022	0.0849	0.01092		-0.0257	0.012	0.008	0.0108	-0.0286	0.0154	0.0078	0.0145	-0.0005	0.0103	-0.0078		-29.6993	0.3713	-27.9861	0.4696	-15.2648	0.1526	-14.7563	0.1331	-16.7954	0.169	-20.9004
	ARG-177	-50.1449	0.7006	-52.4297	1.1067	-26.6223	0.2762	-26.139	0.2468	-29.7667	0.271	-37.0205		0.4369	0.0848	0.831	0.0991	0.1578	0.0784	0.5376	0.0737	-0.5409	0.0827	0.28448		-0.0081	0.0099	-0.0108	0.01	-0.0084	0.009	-0.0094	0.0096	-0.0048	0.0115	-0.0083		-49.7103	0.7107	-51.6347	1.1128	-26.4565	0.2922	-25.6043	0.2471	-30.3083	0.2712	-36.7428
	LEU-178	-1.4254	0.0271	-1.0159	0.0366	-0.3333	0.0161	-0.4939	0.0153	-0.5924	0.0169	-0.77218		0.4327	0.01	0.4869	0.0084	0.3157	0.0086	0.3582	0.0118	-0.0292	0.0171	0.31286		-0.0261	0.0145	0.0178	0.0144	0.0117	0.0167	0.0673	0.0153	-0.0304	0.0155	0.00806		-1.0188	0.0293	-0.5116	0.0387	-0.0062	0.0207	-0.0668	0.0224	-0.6514	0.0278	-0.45096
	CYS-179	-2.1205	0.0302	-1.3269	0.0457	-1.0397	0.018	-0.8718	0.0252	-0.9872	0.0279	-1.26922		0.5526	0.0127	0.4929	0.0131	0.4917	0.0108	0.4528	0.0107	-0.0791	0.0192	0.38218		0.0154	0.0113	0.0468	0.0154	-0.0129	0.0126	-0.0061	0.0104	0.0394	0.0112	0.01652		-1.5541	0.0292	-0.7888	0.0473	-0.5613	0.0208	-0.4276	0.023	-1.0273	0.0202	-0.87182
	SER-180	-0.7595	0.0339	-0.6243	0.0417	-0.1342	0.0206	-0.262	0.0221	-0.4445	0.0244	-0.4449		-0.0742	0.0513	0.1652	0.0623	-0.1369	0.053	-0.0428	0.0495	-0.1436	0.0487	-0.04646		0.0026	0.0098	-0.0036	0.0112	-0.0227	0.0104	-0.0062	0.0103	0.0031	0.0066	-0.00536		-0.832	0.0633	-0.4606	0.0709	-0.297	0.0528	-0.3106	0.0503	-0.5837	0.0535	-0.49678
	ARG-181	-47.0815	0.6928	-49.9469	0.6616	-32.2368	0.2302	-29.0254	0.2015	-26.484	0.2544	-36.9549		-0.7826	0.0802	-0.7255	0.1014	-0.6353	0.084	-0.1101	0.0833	-0.8432	0.0806	-0.61934		-0.0364	0.0164	0.0035	0.0175	0.0308	0.0188	-0.0005	0.0163	0.0147	0.0094	0.00242		-47.8729	0.7055	-50.6547	0.6558	-32.8398	0.2317	-29.1289	0.1979	-27.2962	0.2852	-37.5585
	ALA-182	-0.7527	0.0196	-0.6744	0.0237	-0.1853	0.0123	-0.2148	0.0152	-0.0779	0.0136	-0.38102		0.1573	0.0118	0.1595	0.0121	0.1267	0.0133	0.1588	0.0157	-0.2482	0.0282	0.07082		-0.0084	0.0144	-0.0067	0.0151	-0.0114	0.0173	-0.0795	0.018	-0.0006	0.0139	-0.02132		-0.6042	0.0249	-0.5217	0.0307	-0.0695	0.0219	-0.137	0.0264	-0.3269	0.0319	-0.33186
	LEU-183	0.0638	0.0136	0.0999	0.0139	0.0952	0.0124	0.1222	0.0121	0.1622	0.0158	0.10866		-0.1284	0.0229	-0.0285	0.0251	-0.1044	0.0209	-0.101	0.0266	-0.1266	0.0232	-0.09778		0.0496	0.0195	0.0108	0.0184	-0.009	0.0196	0.0071	0.0185	0.06	0.0185	0.0237		-0.0153	0.0335	0.0826	0.0349	-0.0195	0.0327	0.0264	0.0335	0.0962	0.0339	0.03408
	GLY-184	0.418	0.0202	0.4818	0.0156	0.2602	0.0129	0.2494	0.011	-0.0329	0.0183	0.2753		-0.2003	0.0332	-0.1161	0.0275	-0.2321	0.0309	-0.2457	0.0282	0.0216	0.0307	-0.15452		-0.0027	0.0104	0.0079	0.0115	0.0328	0.0105	-0.0218	0.0109	-0.0103	0.0068	0.00118		0.2152	0.0379	0.3734	0.0359	0.062	0.0339	-0.0188	0.0322	-0.0212	0.0313	0.12212
	GLY-185	0.2802	0.016	0.3712	0.0144	0.088	0.0113	0.1026	0.0094	-0.1762	0.0156	0.13316		-0.056	0.0247	-0.0444	0.031	-0.0712	0.0244	-0.0699	0.0224	0.0203	0.0365	-0.04424		-0.0233	0.0081	-0.0267	0.0074	-0.0096	0.0096	0.0027	0.0075	-0.0126	0.0052	-0.0139		0.1996	0.0307	0.3004	0.0339	0.0062	0.0296	0.0356	0.0264	-0.17	0.0385	0.07436
	LYS-186	-16.3843	0.1458	-16.6232	0.1947	-12.0835	0.0748	-12.2113	0.098	-12.3447	0.0991	-13.9294		-0.6715	0.1486	0.1468	0.1599	-0.7216	0.1539	-0.5291	0.1601	-0.093	0.1429	-0.37368		-0.0351	0.0087	-0.0333	0.0095	0.0055	0.007	-0.0258	0.0084	-0.0239	0.01	-0.02252		-17.0953	0.207	-16.4975	0.2433	-12.8106	0.1714	-12.7703	0.1981	-12.4651	0.172	-14.3278
	ALA-187	-0.328	0.0119	-0.2698	0.0119	-0.1992	0.0091	-0.2756	0.0096	-0.1966	0.0097	-0.25384		0.1562	0.0275	0.1669	0.0262	0.1392	0.0264	0.2018	0.0273	0.3289	0.0212	0.1986		0.0103	0.0101	-0.0134	0.0102	-0.0028	0.012	-0.0322	0.0117	0.0227	0.0137	-0.00308		-0.1609	0.031	-0.1153	0.0294	-0.0629	0.0295	-0.1053	0.0302	0.1546	0.0259	-0.05796
	LYS-188	-8.3081	0.1664	-8.3332	0.2326	-5.0269	0.1065	-5.7829	0.1018	-5.2052	0.1363	-6.53126		-0.937	0.1467	-0.2972	0.1668	-1.0992	0.1364	-0.7407	0.1573	-0.9939	0.1363	-0.8136		0.0061	0.0128	-0.0015	0.0137	0.0088	0.0154	-0.0264	0.0124	-0.0064	0.0127	-0.00388		-9.2368	0.2016	-8.6387	0.2593	-6.1197	0.1678	-6.5487	0.1864	-6.2156	0.1807	-7.3519
	SER-189	-0.4344	0.0153	-0.2756	0.0195	-0.193	0.0136	-0.1976	0.0151	-0.101	0.0146	-0.24032		-0.2511	0.0527	0.1458	0.0527	-0.1513	0.0516	-0.1457	0.0494	0.1846	0.0562	-0.04354		-0.0298	0.009	-0.0165	0.0099	0.0086	0.0078	-0.0052	0.0081	-0.0074	0.0097	-0.01006		-0.7145	0.0537	-0.1496	0.057	-0.3365	0.0523	-0.3472	0.0558	0.0775	0.0583	-0.29406
	GLU-190	19.3825	0.2132	20.7624	0.2061	14.502	0.0889	14.3314	0.1042	14.3851	0.1036	16.6727		1.5234	0.1151	1.1606	0.12	1.4373	0.1244	1.5999	0.128	2.3534	0.122	1.61492		-0.0048	0.0131	0.0058	0.0175	-0.0389	0.0186	-0.0116	0.0105	-0.0205	0.0145	-0.014		20.8963	0.2426	21.9299	0.2439	15.9041	0.142	15.9166	0.1467	16.7151	0.1566	18.2724
	LEU-191	-0.6535	0.0136	-0.4514	0.0139	-0.4488	0.0108	-0.4839	0.0138	-0.3408	0.0117	-0.47568		0.1746	0.0111	0.1298	0.0064	0.1624	0.009	0.1685	0.0108	0.2303	0.0063	0.17312		-0.0281	0.0246	-0.0484	0.0254	-0.0862	0.0246	-0.0423	0.0238	0.0028	0.022	-0.04044		-0.5055	0.0281	-0.3697	0.0287	-0.3716	0.0284	-0.358	0.0283	-0.1077	0.0257	-0.3425
	ARG-192	-10.0641	0.1823	-9.7558	0.2415	-6.8525	0.1685	-3.7962	0.2021	-6.5153	0.0942	-7.39678		-0.9086	0.0657	-0.5807	0.0757	-1.0949	0.0652	-1.2061	0.0749	-1.3531	0.0634	-1.02868		0.0116	0.0145	0.0357	0.0151	0.0263	0.0141	-0.0293	0.0168	0.0304	0.0154	0.01494		-10.9471	0.1921	-10.2883	0.2347	-7.9305	0.1675	-5.0318	0.1775	-7.8353	0.0974	-8.4066
	ASN-193	-0.5093	0.0193	-0.314	0.0308	-0.381	0.016	-0.1554	0.0253	-0.0467	0.0248	-0.28128		-0.1276	0.0587	0.0419	0.0718	-0.1873	0.0518	-0.142	0.0513	0.0213	0.0643	-0.07874		-0.0082	0.0136	0.032	0.0139	0.0016	0.013	0.0016	0.0134	0.0372	0.0159	0.01284		-0.6435	0.0624	-0.2437	0.0804	-0.5653	0.0556	-0.2972	0.0605	0.0131	0.0715	-0.34732
	TRP-194	0.2891	0.0297	-0.048	0.0342	0.9577	0.0354	-0.4787	0.0157	-0.7626	0.0198	-0.0085		-0.371	0.0168	-0.2445	0.0137	-0.5612	0.016	0.0795	0.0143	0.2919	0.0262	-0.16106		0.0192	0.0121	0.0034	0.015	0.0008	0.0153	-0.0168	0.015	0.0013	0.0151	0.00158		-0.0627	0.0294	-0.289	0.0337	0.3989	0.031	-0.416	0.0255	-0.4709	0.0356	-0.16794
	ARG-195	1.618	0.3274	-0.1634	0.3169	7.7853	0.2507	5.6716	0.2855	5.9062	0.2266	4.16354		-3.0552	0.1198	-1.9997	0.1298	-3.5647	0.1292	-3.1017	0.1702	-5.1564	0.0895	-3.37554		0.0281	0.0105	0.0223	0.0119	0.0302	0.0131	0.0052	0.0108	0.09	0.0156	0.03516		-1.4154	0.2732	-2.1511	0.2735	4.2572	0.2044	2.58	0.2401	0.8407	0.1986	0.82228
	MET-196	-0.0771	0.0164	0.2558	0.0226	-0.1292	0.0134	0.1014	0.0194	0.1484	0.0213	0.05986		-0.057	0.0092	-0.098	0.0141	-0.0375	0.0081	-0.0607	0.0105	-0.1183	0.0132	-0.0743		0.0023	0.0133	0.0085	0.0176	0.0006	0.0162	0.0236	0.015	0.029	0.0152	0.0128		-0.131	0.0215	0.1683	0.0326	-0.1669	0.0202	0.0636	0.0243	0.0579	0.024	-0.00162
	ALA-197	0.5522	0.0084	0.579	0.0107	0.7677	0.0093	0.8715	0.0094	0.704	0.009	0.69488		-0.1448	0.0077	-0.1189	0.0063	-0.1806	0.0066	-0.1692	0.0081	-0.1935	0.0132	-0.1614		0.0316	0.0117	0.0674	0.0114	0.0693	0.0116	-0.0053	0.0172	-0.065	0.0175	0.0196		0.4391	0.0152	0.5277	0.0171	0.6565	0.0153	0.6971	0.0216	0.4443	0.0216	0.55294
	GLN-198	1.4662	0.0624	1.0129	0.0655	1.8234	0.0768	0.9949	0.0878	0.3222	0.0843	1.12392		-0.3606	0.0596	-0.1017	0.0543	-0.8321	0.0596	-0.2319	0.0741	1.6777	0.1127	0.03028		0.0088	0.0082	-0.0119	0.0082	0.019	0.0084	-0.0003	0.0087	-0.1458	0.0176	-0.02604		1.1092	0.0797	0.8993	0.079	1.0054	0.0887	0.7609	0.0906	1.8519	0.115	1.12534
	SER-199	0.2016	0.0121	0.1531	0.0136	0.4721	0.0113	0.302	0.0124	0.1226	0.0129	0.25028		-0.0909	0.0216	-0.0442	0.0211	-0.175	0.023	-0.114	0.0247	-0.186	0.02	-0.12202		-0.0217	0.0071	0.0093	0.0085	-0.0205	0.0116	0.0143	0.0101	0.0055	0.0098	-0.00262		0.0891	0.0239	0.1184	0.0269	0.2758	0.0284	0.2026	0.0274	-0.0581	0.0256	0.12556
	LEU-200	0.5248	0.0073	0.4065	0.0088	0.6154	0.0098	0.5741	0.0078	0.5125	0.0079	0.52666		-0.1359	0.006	-0.1054	0.0057	-0.1238	0.0052	-0.1082	0.004	-0.1753	0.0043	-0.12972		-0.0251	0.0196	-0.0123	0.0175	-0.0026	0.017	0.0209	0.0181	0.0072	0.0166	-0.00238		0.3627	0.0213	0.2884	0.0203	0.4891	0.0182	0.4854	0.0199	0.3431	0.0193	0.39374
	LEU-201	0.9702	0.0109	0.7988	0.013	1.1421	0.014	1.0052	0.0121	0.9504	0.011	0.97334		-0.1776	0.0133	-0.0982	0.012	-0.1582	0.0119	-0.1052	0.012	-0.1936	0.012	-0.14656		0.0124	0.0176	-0.0532	0.0204	-0.0425	0.0173	-0.0252	0.018	0.0489	0.0188	-0.01192		0.8046	0.0238	0.6463	0.0273	0.9414	0.0235	0.8758	0.0237	0.8067	0.0247	0.81496
	ASN-202	-0.2473	0.0353	0.2999	0.0419	0.7825	0.0722	-0.0203	0.0537	0.3368	0.0514	0.23032		-0.1123	0.0476	0.0348	0.0683	-0.3202	0.0694	-0.0146	0.0712	-0.0212	0.0672	-0.0867		0.0413	0.0103	0.0113	0.0104	-0.0011	0.0102	0.0252	0.0125	0.0797	0.0141	0.03128		-0.3194	0.0581	0.3448	0.0837	0.4626	0.0925	-0.0055	0.0911	0.3932	0.0806	0.17514
	SER-203	0.5847	0.0127	0.1974	0.0131	0.4881	0.0151	0.4353	0.0148	0.6611	0.0109	0.47332		-0.1905	0.0336	-0.0229	0.029	-0.0982	0.0209	-0.1041	0.0209	-0.1297	0.0223	-0.10908		-0.0238	0.0114	0.0309	0.0093	0.0293	0.0089	0.0103	0.0084	-0.0127	0.0072	0.0068		0.3715	0.0392	0.2043	0.0322	0.4199	0.0256	0.342	0.0272	0.5181	0.0257	0.37116
	VAL-204	0.5689	0.0117	0.2676	0.0104	0.4435	0.0123	0.2951	0.0105	0.3821	0.0124	0.39144		-0.1142	0.0233	-0.0708	0.0231	-0.1008	0.0194	-0.0749	0.0216	-0.0681	0.0182	-0.08576		0.0002	0.0156	0.0068	0.0136	-0.0104	0.0143	0.0012	0.0145	0.0055	0.0154	0.00066		0.4564	0.0277	0.2037	0.0302	0.332	0.0252	0.2216	0.0276	0.3188	0.0266	0.3065
	GLU-205	25.6984	0.2286	32.5232	0.2491	33.3211	0.1506	34.4191	0.1929	33.2158	0.235	31.8355		-0.2369	0.1412	0.407	0.1731	-0.6752	0.1344	-0.3532	0.1719	0.5742	0.1576	-0.05682		0.0162	0.0071	0.0155	0.0138	0.0102	0.0129	0.0146	0.0117	0.0295	0.0142	0.0172		25.4838	0.2672	32.9433	0.3066	32.6525	0.2119	34.0785	0.2697	33.8196	0.3092	31.7955
	GLY-206	0.0453	0.0072	0.0483	0.0075	0.2735	0.0132	0.3339	0.0128	0.2609	0.0108	0.19238		-0.0111	0.0128	0.0037	0.0117	-0.0652	0.0331	-0.1053	0.0302	-0.1085	0.0288	-0.05728		0.01	0.0042	0.0145	0.0041	-0.0043	0.0031	-0.0043	0.0042	0.0028	0.0038	0.00374		0.0444	0.0149	0.0662	0.0137	0.2041	0.0361	0.2253	0.033	0.1561	0.0306	0.13922
	HIS-207	0.1561	0.0245	0.4205	0.0254	1.4468	0.0277	0.9022	0.0282	1.2839	0.0251	0.8419		-0.3705	0.0754	0.1475	0.1051	-0.2501	0.0658	-0.1548	0.069	-0.233	0.053	-0.17218		0.0442	0.0114	0.0566	0.012	0.0305	0.012	0.0229	0.013	0.0048	0.0091	0.0318		-0.1693	0.0754	0.6267	0.1049	1.2267	0.0717	0.7709	0.0765	1.0553	0.0557	0.70206
	GLU-208	17.1547	0.0999	17.6536	0.1088	18.1896	0.0742	18.0968	0.0731	16.3474	0.0729	17.4884		-1.0771	0.1337	-0.2563	0.1536	-0.8396	0.1499	-0.7824	0.1502	0.9513	0.1573	-0.40082		-0.012	0.0072	0.0063	0.0083	-0.0078	0.0119	0.0109	0.009	-0.0128	0.0102	-0.00308		16.07	0.1716	17.4034	0.1939	17.3404	0.172	17.3316	0.1647	17.283	0.1779	17.0857
	ASN-209	-0.1313	0.0184	-0.1903	0.0199	-0.4266	0.0151	-0.4076	0.0187	-0.2654	0.0181	-0.28424		-0.2414	0.065	-0.0948	0.0686	-0.431	0.063	-0.3886	0.067	0.1303	0.0771	-0.2051		-0.0031	0.011	0.0354	0.0112	0.0167	0.01	-0.0145	0.008	0.0109	0.0076	0.00908		-0.3768	0.0702	-0.2504	0.0719	-0.8373	0.0651	-0.8145	0.0646	-0.1224	0.0794	-0.48028
	ILE-210	-0.3596	0.007	-0.4283	0.0073	-0.5455	0.0059	-0.51	0.0061	-0.4945	0.0065	-0.46758		0.0275	0.0269	-0.083	0.0298	-0.0132	0.0276	0.001	0.0277	0.1231	0.0207	0.01108		0.0101	0.0205	-0.099	0.0193	0.0474	0.022	0.0502	0.0186	0.0307	0.0185	0.00788		-0.3238	0.0336	-0.6096	0.038	-0.5107	0.037	-0.4589	0.0335	-0.3395	0.0314	-0.4485
	THR-211	-0.3657	0.008	-0.3906	0.0086	-0.4567	0.0076	-0.452	0.0075	-0.4835	0.0084	-0.4297		-0.1345	0.0402	-0.0053	0.0429	-0.1548	0.038	-0.1747	0.045	0.0742	0.0407	-0.07902		-0.0352	0.0097	-0.0032	0.0115	-0.0822	0.0155	-0.062	0.0159	-0.0408	0.0128	-0.04468		-0.5368	0.0405	-0.3984	0.0451	-0.6925	0.0391	-0.6882	0.052	-0.45	0.0456	-0.55318
	GLN-212	-0.1791	0.0109	-0.2768	0.0102	-0.4342	0.0101	-0.4585	0.0104	-0.4124	0.0086	-0.3522		-0.1036	0.065	0.147	0.0698	-0.2177	0.0659	-0.2095	0.0674	-0.0662	0.0611	-0.09		-0.0052	0.0079	0.0325	0.0087	0.0255	0.0087	0.0086	0.0106	0.0129	0.0085	0.01486		-0.2872	0.0656	-0.0973	0.0721	-0.629	0.0666	-0.6617	0.0701	-0.4641	0.0626	-0.42786
	LEU-213	-0.805	0.0131	-0.8977	0.0117	-0.966	0.0093	-0.9602	0.0107	-0.916	0.0115	-0.90898		-0.0227	0.0047	-0.0196	0.0039	0.0061	0.0045	-0.0059	0.0036	-0.0305	0.0049	-0.01452		0.0325	0.0157	0.0431	0.0166	-0.029	0.0132	-0.0107	0.015	-0.0163	0.0119	0.00392		-0.7949	0.0203	-0.874	0.0206	-0.9888	0.0167	-0.9759	0.019	-0.9627	0.0176	-0.91926
	ALA-214	-0.8677	0.0119	-0.8619	0.0108	-0.8784	0.0087	-0.9451	0.0098	-0.7391	0.0118	-0.85844		0.0053	0.0122	0.0158	0.0081	-0.104	0.0204	-0.0243	0.0113	0.0565	0.0196	-0.01014		0.001	0.0104	-0.011	0.0081	0.0116	0.017	0.0179	0.0076	-0.0126	0.0114	0.00138		-0.8621	0.0187	-0.857	0.0161	-0.9714	0.0271	-0.9518	0.0155	-0.6953	0.0262	-0.86752
	VAL-215	-0.9639	0.014	-0.9856	0.0112	-1.1384	0.0193	-0.7602	0.0104	-0.6214	0.011	-0.8939		-0.0679	0.0295	0.0162	0.0239	-0.1627	0.0332	-0.0994	0.0262	-0.0273	0.0229	-0.06822		-0.0101	0.0107	0.0374	0.0144	0.0102	0.0093	0.0147	0.0143	0.0158	0.0106	0.0136		-1.0415	0.0332	-0.932	0.0316	-1.2918	0.0417	-0.8439	0.0321	-0.6333	0.0285	-0.9485
	ASN-216	-1.0468	0.0257	-1.0527	0.0231	-0.4026	0.041	-0.6967	0.0298	-0.4765	0.0254	-0.73506		-0.2158	0.0606	0.1802	0.0869	-0.3039	0.0611	-0.0607	0.0678	-0.134	0.0576	-0.10684		-0.0051	0.006	-0.0068	0.0073	0.0019	0.0072	0.0126	0.0066	-0.0035	0.007	-0.00018		-1.2649	0.067	-0.8767	0.0926	-0.7073	0.0728	-0.7429	0.0733	-0.6112	0.065	-0.8406
	HIS-217	-4.0388	0.0712	-3.5505	0.057	-0.0558	0.115	-3.8128	0.064	-2.4278	0.0606	-2.77714		0.0242	0.0499	0.1384	0.0552	-0.4984	0.0855	0.0842	0.0514	0.2538	0.0529	0.00044		0.0245	0.009	0.0094	0.0113	-0.0237	0.0115	-0.0159	0.0146	0.0628	0.0117	0.01142		-3.9881	0.0833	-3.3999	0.0761	-0.5797	0.1137	-3.7413	0.0752	-2.1116	0.0824	-2.76412
	GLY-218	-0.489	0.0183	-0.4224	0.0202	-0.3343	0.0215	-0.5337	0.0186	0.5033	0.0162	-0.25522		-0.1011	0.0337	-0.0173	0.0323	-0.0854	0.0263	-0.0968	0.0273	0.2224	0.0344	-0.01564		-0.0036	0.0052	0.0214	0.0092	0.0233	0.0114	-0.0121	0.0072	0.006	0.0077	0.007		-0.5937	0.036	-0.4181	0.0371	-0.398	0.0376	-0.6411	0.0351	0.7315	0.0376	-0.26388
	TYR-219	-0.6402	0.0177	-0.4163	0.0207	0.2536	0.0147	0.1791	0.02	-0.6614	0.0174	-0.25704		0.0292	0.0244	-0.0078	0.0273	-0.0606	0.0221	-0.2679	0.0468	0.2526	0.0255	-0.0109		-0.0046	0.0097	0.0266	0.0108	-0.0029	0.0109	-0.0063	0.0103	-0.0242	0.0113	-0.00228		-0.616	0.03	-0.3979	0.037	0.1904	0.0304	-0.0945	0.0486	-0.4315	0.0324	-0.2699
	SER-220	0.1967	0.0152	0.2233	0.0177	0.2825	0.0126	0.4183	0.0153	0.2874	0.0184	0.28164		-0.1985	0.0575	0.066	0.077	-0.3524	0.0644	-0.2639	0.054	0.0041	0.0621	-0.14894		-0.0099	0.0069	0.009	0.0077	-0.0067	0.0087	0.0017	0.0092	-0.0137	0.0086	-0.00392		-0.0101	0.0584	0.3013	0.0766	-0.0778	0.0645	0.1545	0.0559	0.278	0.065	0.12918
	SER-221	0.3064	0.0079	0.3817	0.0087	0.1445	0.0067	0.1995	0.0059	0.3874	0.0072	0.2839		-0.1709	0.0495	0.0659	0.0487	-0.1551	0.039	-0.172	0.0368	0.1515	0.0497	-0.05612		0.0053	0.0052	0.0008	0.0046	-0.0027	0.0061	-0.0149	0.0065	-0.0107	0.0051	-0.00444		0.1402	0.0497	0.4471	0.0479	-0.0115	0.039	0.0125	0.038	0.5269	0.0499	0.22304
	PRO-222	0.1313	0.0028	0.1705	0.0027	0.1071	0.0037	0.0738	0.0032	0.1443	0.0032	0.1254		0.0125	0.0048	0.0167	0.0044	0.0176	0.005	0.0136	0.0055	0.0253	0.0046	0.01714		-0.0057	0.0146	-0.0069	0.0147	-0.0189	0.0159	-0.0098	0.012	-0.0051	0.012	-0.00928		0.1385	0.016	0.1804	0.0148	0.1051	0.0158	0.0774	0.0133	0.165	0.0132	0.13328
	SER-223	0.2187	0.0058	0.2282	0.007	0.1369	0.0069	0.1305	0.0071	0.1784	0.0065	0.17854		-0.1412	0.0465	0.0546	0.0624	-0.285	0.0478	-0.1553	0.0504	0.115	0.0503	-0.08238		-0.0023	0.005	0.0042	0.009	0.0038	0.0067	-0.0016	0.0049	-0.0028	0.0056	0.00026		0.0749	0.0479	0.2892	0.0605	-0.1436	0.0506	-0.0275	0.0492	0.2893	0.0549	0.09646
	HIS-224	0.3644	0.0133	0.3497	0.0166	0.4378	0.0133	0.2874	0.019	0.2533	0.0195	0.33852		-0.2051	0.0617	0.0398	0.0654	-0.1394	0.0607	-0.1653	0.0614	0.1344	0.0605	-0.06712		0.0033	0.0074	-0.0135	0.0088	-0.0224	0.0108	-0.0302	0.01	-0.0025	0.0084	-0.01306		0.1613	0.0629	0.3751	0.0697	0.275	0.0632	0.0936	0.0641	0.3843	0.0651	0.25786
	PHE-225	0.1906	0.0055	0.2411	0.0057	0.199	0.0056	0.1728	0.005	0.215	0.0057	0.2037		0.0085	0.0046	0.0166	0.005	0.0158	0.0056	-0.0127	0.0071	0.0069	0.0064	0.00702		-0.0434	0.0093	0.0106	0.012	0.0109	0.0137	0.017	0.0142	-0.0267	0.0158	-0.00632		0.156	0.0119	0.2675	0.0142	0.226	0.0158	0.1766	0.0171	0.1948	0.0172	0.20418
	SER-226	0.3981	0.0052	0.4929	0.0051	0.3371	0.0107	0.2647	0.0092	0.4167	0.0057	0.3819		0.0368	0.0202	0.0262	0.0209	-0.0467	0.0318	-0.0083	0.0368	-0.0374	0.0355	-0.00588		-0.0097	0.0071	0.0224	0.0079	-0.0293	0.0112	-0.0362	0.0118	-0.0091	0.0106	-0.01238		0.4251	0.0234	0.5419	0.0229	0.2628	0.035	0.2195	0.041	0.3716	0.0377	0.36418
	SER-227	0.1961	0.0028	0.2765	0.0064	0.2703	0.0068	0.2655	0.0088	0.2917	0.0082	0.26002		-0.0775	0.0383	0.053	0.0383	-0.075	0.0413	-0.0703	0.0395	-0.0688	0.0508	-0.04772		-0.0068	0.007	0.0081	0.0082	0.0079	0.012	-0.0341	0.0114	-0.0045	0.007	-0.00588		0.1124	0.0379	0.339	0.0398	0.2043	0.0449	0.1627	0.0414	0.2194	0.049	0.20756
	GLU-228	11.0829	0.1305	11.8217	0.1331	8.1715	0.0721	7.8709	0.0813	8.8363	0.0843	9.55666		0.0917	0.1178	0.5488	0.146	0.0055	0.0975	0.1633	0.1128	0.8044	0.1375	0.32274		0.0197	0.0143	-0.0025	0.0137	0.0116	0.009	0.0191	0.0108	0.0115	0.0118	0.01188		11.1972	0.1757	12.3546	0.2062	8.1878	0.116	8.0543	0.1469	9.6549	0.1539	9.88976
	ILE-229	0.2625	0.0047	0.3404	0.0043	0.2306	0.0045	0.2251	0.0048	0.2964	0.0051	0.271		0.047	0.0025	0.0226	0.0035	0.0415	0.0025	0.0398	0.0031	0.0456	0.0032	0.0393		0.0201	0.0259	-0.0741	0.022	0.061	0.0246	0.0501	0.0207	0.0146	0.0206	0.01434		0.3299	0.0253	0.2896	0.0215	0.3337	0.0255	0.3159	0.0218	0.3555	0.0207	0.32492
	LYS-230	-14.2284	0.1072	-14.7205	0.0986	-12.6719	0.0539	-12.9076	0.0634	-12.1776	0.0591	-13.3412		-0.3627	0.0974	0.0129	0.0936	-0.4291	0.0894	-0.547	0.1081	-0.2963	0.1269	-0.32444		0.0049	0.0157	-0.0375	0.0162	-0.0665	0.0171	-0.006	0.0161	0.0013	0.0149	-0.02076		-14.586	0.1452	-14.7466	0.1359	-13.1653	0.1061	-13.4584	0.1384	-12.4783	0.1308	-13.6869
	GLU-231	14.0558	0.1085	14.6854	0.1042	11.8442	0.0614	11.7859	0.0595	12.8951	0.0557	13.0533		-0.451	0.136	-0.0821	0.1608	-0.8379	0.1429	-0.5573	0.1385	0.1354	0.093	-0.35858		0.0015	0.0106	0.0302	0.0126	0.0279	0.0129	-0.0074	0.0136	-0.053	0.0167	-0.00016		13.6125	0.1697	14.6388	0.1907	11.0293	0.1562	11.2159	0.1538	12.9741	0.1126	12.6941
	LEU-232	0.3485	0.0045	0.3888	0.0046	0.3253	0.004	0.2906	0.0048	0.3217	0.0045	0.33498		-0.0384	0.0262	0.026	0.0276	-0.0346	0.0187	-0.0782	0.0224	-0.0427	0.0203	-0.03358		0.0118	0.0185	0.0386	0.0163	-0.0122	0.0155	-0.0008	0.0182	0.0267	0.0152	0.01282		0.3209	0.0328	0.4534	0.0327	0.2772	0.0242	0.2118	0.0274	0.3071	0.025	0.31408
	ILE-233	0.3974	0.0042	0.4599	0.0046	0.444	0.0033	0.4255	0.0036	0.433	0.0041	0.43196		0.0068	0.0125	0.0441	0.015	0.0019	0.0066	0.0067	0.0091	-0.0166	0.0088	0.00858		0.0199	0.0174	0.0128	0.0186	0.0421	0.0185	0.0133	0.015	-0.0427	0.0173	0.00908		0.4249	0.0219	0.5166	0.023	0.4879	0.0199	0.4457	0.018	0.375	0.0203	0.45002
	GLY-234	0.089	0.0033	0.0962	0.0043	0.1598	0.003	0.1327	0.0029	0.1077	0.0027	0.11708		-0.0366	0.0081	-0.0083	0.0087	-0.034	0.0045	-0.0278	0.004	-0.0468	0.0025	-0.0307		0.0149	0.0078	0.0088	0.0075	-0.0001	0.0068	-0.0047	0.0071	0.0054	0.0052	0.00486		0.0675	0.0105	0.0969	0.0124	0.1259	0.0086	0.1005	0.0092	0.0663	0.0066	0.09142
	VAL-235	-0.2255	0.0042	-0.2821	0.0047	-0.3033	0.0031	-0.2893	0.0038	-0.2853	0.0036	-0.2771		-0.0101	0.0064	-0.0179	0.0064	-0.019	0.0076	-0.0052	0.0051	0.0182	0.0061	-0.0068		-0.0074	0.0152	-0.0068	0.0126	-0.0395	0.0133	-0.0075	0.0117	0.038	0.0135	-0.00464		-0.2424	0.0167	-0.3076	0.0144	-0.3627	0.0168	-0.3029	0.0138	-0.2282	0.0147	-0.28876
	SER-236	0.1829	0.0065	0.2262	0.0085	0.2758	0.0088	0.2494	0.0088	0.1509	0.0084	0.21704		-0.1089	0.042	0.043	0.0561	-0.2197	0.0424	-0.1965	0.0425	0.0467	0.0344	-0.08708		0.0007	0.0093	0.0167	0.0075	0.0011	0.0086	-0.0047	0.0084	0.0158	0.0091	0.00592		0.0734	0.0436	0.2857	0.0592	0.0584	0.0441	0.048	0.0435	0.2119	0.0374	0.13548
	PRO-237	-0.0836	0.0041	0.0814	0.0057	0.0666	0.0066	0.0942	0.0055	-0.0149	0.0039	0.02874		-0.0895	0.0153	0.0253	0.0059	0.0155	0.0062	0.0145	0.0066	-0.0714	0.0136	-0.02112		-0.0026	0.0183	-0.0261	0.02	-0.0368	0.0259	-0.0179	0.0197	0.0094	0.0169	-0.0148		-0.1763	0.0255	0.0821	0.0213	0.0452	0.0274	0.0903	0.0228	-0.076	0.0202	-0.00694
	ARG-238	-20.5188	0.148	-21.2236	0.1303	-20.3378	0.0877	-20.3172	0.0859	-19.6727	0.0972	-20.414		-0.6097	0.0617	-0.1127	0.071	-0.4845	0.0549	-0.3749	0.0548	-0.3445	0.0604	-0.38526		-0.0006	0.0153	-0.0124	0.013	0.021	0.0159	-0.0006	0.0147	-0.0211	0.0149	-0.00274		-21.1367	0.1562	-21.3513	0.1431	-20.8003	0.1032	-20.6965	0.1054	-20.038	0.1153	-20.8046
	LYS-239	-18.4376	0.1269	-20.5951	0.1611	-20.0722	0.1118	-19.4426	0.0994	-18.4941	0.1476	-19.4083		-0.595	0.1424	-0.1322	0.1427	-0.5698	0.1259	-0.5378	0.1384	0.1357	0.1509	-0.33982		0.0016	0.0089	0.0076	0.0086	-0.0111	0.0095	-0.0091	0.0095	-0.003	0.009	-0.0028		-19.0425	0.1904	-20.7192	0.2216	-20.6629	0.161	-19.9979	0.1786	-18.3577	0.2275	-19.756
	LEU-240	-0.095	0.0088	-0.0856	0.0139	-0.31	0.0075	-0.2743	0.0087	-0.1878	0.0122	-0.19054		-0.003	0.0158	0.0279	0.0151	-0.0028	0.0186	-0.0249	0.018	0.0018	0.0207	-0.0002		0.0199	0.0189	0.0014	0.0176	0.0212	0.0172	-0.0085	0.0168	0.0393	0.0167	0.01466		-0.0775	0.0292	-0.0555	0.0275	-0.2919	0.0275	-0.3075	0.0235	-0.1461	0.03	-0.1757
	SER-241	-0.1477	0.01	-0.1969	0.0134	-0.2304	0.0131	-0.2283	0.0127	-0.1847	0.0119	-0.1976		-0.1393	0.0468	0.0513	0.0537	-0.2217	0.0516	-0.1389	0.0616	-0.0674	0.057	-0.1032		-0.0023	0.0078	-0.0111	0.0095	-0.0103	0.0092	0.0043	0.0093	-0.0124	0.0095	-0.00636		-0.2872	0.048	-0.1576	0.0575	-0.462	0.0568	-0.3642	0.0655	-0.2661	0.0581	-0.30742
	ASN-242	0.0717	0.0165	0.0731	0.0212	-0.1592	0.0176	-0.0519	0.0173	0.1096	0.0177	0.00866		-0.1741	0.0661	0.1443	0.0688	-0.302	0.0657	-0.288	0.0677	0.1313	0.0753	-0.0977		0.0035	0.0105	-0.006	0.0091	-0.0158	0.0119	0.0045	0.0097	0.0197	0.0099	0.00118		-0.0969	0.0704	0.2117	0.0728	-0.4779	0.0718	-0.333	0.0675	0.259	0.0744	-0.08742
	ILE-243	-0.0905	0.0028	-0.1049	0.0033	-0.1195	0.0036	-0.121	0.0035	-0.0941	0.0029	-0.106		-0.1791	0.0329	-0.0754	0.0369	-0.1536	0.0347	-0.1352	0.0325	0.0534	0.0375	-0.09798		0.0043	0.0109	-0.0031	0.0133	0.0178	0.011	-0.0019	0.0116	0.0038	0.0093	0.00418		-0.2657	0.0355	-0.182	0.038	-0.2548	0.0363	-0.2568	0.034	-0.0364	0.0385	-0.19914
	ILE-244	0.0091	0.0029	-0.0065	0.0036	-0.1724	0.0031	-0.2008	0.003	-0.2195	0.0029	-0.11802		-0.1059	0.0249	0.0036	0.0295	-0.0811	0.016	-0.0616	0.0173	0.0401	0.0233	-0.04098		-0.0235	0.0144	-0.0122	0.0186	-0.0651	0.0183	0.0233	0.0146	0.0245	0.0146	-0.0106		-0.1206	0.0301	-0.0148	0.0364	-0.3193	0.026	-0.2389	0.0236	-0.1545	0.0275	-0.16962
	GLN-245	-0.0907	0.0115	-0.0214	0.0155	-0.3357	0.0106	-0.2341	0.0132	0.2512	0.007	-0.08614		-0.4362	0.0772	0.2069	0.088	-0.4379	0.0711	-0.2562	0.0727	0.1651	0.0527	-0.15166		0.0098	0.007	-0.006	0.007	0.0157	0.0147	-0.021	0.015	-0.0179	0.011	-0.00388		-0.5156	0.0755	0.1797	0.089	-0.7556	0.0717	-0.5113	0.0723	0.4032	0.0535	-0.23992
	LEU-246	0.0456	0.0028	0.0455	0.0035	0.0405	0.0025	0.0543	0.0022	0.0924	0.0031	0.05566		-0.0801	0.0346	0.1442	0.0394	-0.038	0.0188	-0.024	0.0194	0.0534	0.0252	0.0111		0.0116	0.0107	-0.0185	0.011	-0.0166	0.0093	-0.0016	0.0103	-0.0046	0.0075	-0.00594		-0.0239	0.0373	0.1705	0.0417	-0.0137	0.0201	0.0281	0.0217	0.1414	0.0256	0.06048
	ALA-247	-0.1026	0.0024	-0.1226	0.0031	-0.034	0.0035	-0.0027	0.0038	0.0695	0.0058	-0.03848		-0.0509	0.0345	0.046	0.0348	-0.1117	0.0338	-0.0158	0.0276	0.1249	0.0198	-0.0015		0.0218	0.0104	0.0076	0.0121	0.0229	0.0118	-0.0259	0.0118	0.0118	0.007	0.00764		-0.132	0.0365	-0.0681	0.0371	-0.1237	0.0366	-0.0451	0.0299	0.2059	0.0218	-0.0326
	ASP-248	13.8815	0.0921	14.2954	0.0851	13.0855	0.0644	12.7088	0.0592	13.9752	0.0671	13.5893		-0.4621	0.1355	0.1629	0.1616	-0.477	0.13	-0.4263	0.159	0.2393	0.1508	-0.19264		0.0138	0.0085	-0.0076	0.0088	-0.0041	0.0082	-0.0259	0.0101	-0.012	0.0074	-0.00716		13.4326	0.1711	14.462	0.1821	12.6074	0.146	12.2569	0.1679	14.1909	0.166	13.39
	LYS-249	1.5297	0.018	1.4365	0.0342	1.2378	0.0552	0.7892	0.0431	1.8004	0.0499	1.35872		-0.8379	0.1967	0.2248	0.198	-1.5353	0.1944	-1.0982	0.2032	0.0841	0.1898	-0.6325		-0.0043	0.0124	0.0021	0.0117	-0.0194	0.0144	-0.0116	0.0112	-0.0343	0.0192	-0.0135		0.6821	0.1963	1.6704	0.207	-0.3214	0.2095	-0.323	0.2118	1.8521	0.2039	0.71204
RpoA	PHE-249	23.6897	0.1306	22.8813	0.1999	27.8183	0.1614	25.222	0.1591	25.0145	0.1705	24.9252		-0.3305	0.1692	-0.4504	0.1825	-0.8175	0.1213	-0.4679	0.1237	0.624	0.1455	-0.28846		-0.0196	0.0132	-0.0317	0.0119	-0.0175	0.0123	0.0076	0.0116	-0.0245	0.0142	-0.01714		23.3394	0.2096	22.3929	0.2388	26.9819	0.2048	24.7588	0.1706	25.6173	0.2206	24.6181
	ASP-250	-21.5566	0.1365	-19.2458	0.2516	-22.4827	0.1649	-20.6802	0.1855	-20.2228	0.1892	-20.8376		0.6401	0.1583	0.0383	0.1628	1.426	0.1205	1.7592	0.136	1.475	0.137	1.06772		0.0015	0.0084	-0.0081	0.0062	-0.0037	0.0074	0.0016	0.0068	-0.0041	0.0064	-0.00256		-20.9157	0.1944	-19.2302	0.2907	-21.061	0.2019	-18.9095	0.2091	-18.7441	0.1883	-19.7721
	PRO-251	-0.7969	0.0193	-0.7017	0.0227	-0.6863	0.0266	-0.5521	0.0239	-0.3132	0.0269	-0.61004		0.1769	0.0252	0.0162	0.0195	0.1095	0.0259	0.2114	0.0326	0.1176	0.0303	0.12632		0.0012	0.0081	0.0001	0.0071	-0.0083	0.0085	0.0003	0.0096	-0.0098	0.009	-0.0033		-0.619	0.0327	-0.6844	0.0255	-0.584	0.0356	-0.3377	0.0321	-0.2053	0.0338	-0.48608
	ILE-252	-1.1968	0.0177	-0.7865	0.0321	-1.0016	0.0246	-0.8919	0.0212	-0.7277	0.0228	-0.9209		0.1611	0.0269	-0.0039	0.0234	0.2758	0.0202	0.4326	0.0236	0.1404	0.0263	0.2012		0.0585	0.0189	-0.0218	0.0154	0.0199	0.015	0.0298	0.0147	-0.0196	0.0159	0.01336		-0.9763	0.0375	-0.8106	0.0285	-0.7071	0.0282	-0.4278	0.0229	-0.6064	0.0259	-0.70564
	LEU-253	-1.3961	0.0126	-1.2104	0.0184	-1.6005	0.016	-1.3264	0.018	-1.3628	0.0185	-1.37924		0.2236	0.0126	0.2511	0.0171	0.5401	0.0136	0.511	0.0178	0.3589	0.0199	0.37694		0.0167	0.0253	-0.0017	0.0149	0.0775	0.0241	0.0389	0.0172	-0.0378	0.0168	0.01872		-1.156	0.0284	-0.9616	0.0186	-0.9835	0.028	-0.7772	0.0207	-1.0414	0.0222	-0.98394
	LEU-254	-1.9804	0.0273	-2.0659	0.0335	-2.7328	0.0412	-2.0418	0.0366	-1.6842	0.0386	-2.10102		0.3501	0.031	0.4101	0.0355	0.9651	0.0392	0.7428	0.0395	0.5846	0.0422	0.61054		-0.0189	0.0124	0.0133	0.021	0.0169	0.0172	-0.0145	0.0147	-0.0344	0.015	-0.00752		-1.6505	0.0374	-1.6441	0.0447	-1.7493	0.0432	-1.3149	0.0418	-1.1359	0.044	-1.49894
	ARG-255	20.3287	0.4719	12.9101	0.7026	4.2728	0.6567	10.5177	0.8672	3.201	0.753	10.2461		2.0016	0.3524	4.5022	0.4249	33.1348	0.9181	24.2172	1.027	34.6393	0.7997	19.699		-0.1393	0.0206	-0.0477	0.0158	-0.9628	0.024	-1.0121	0.0207	-1.1759	0.0215	-0.66756		22.2058	0.3808	17.388	0.5661	36.4072	0.5061	33.6876	0.4314	36.6742	0.3631	29.2726
	PRO-256	0.6461	0.0349	2.0525	0.0393	0.4242	0.0699	-0.3488	0.0557	-0.2253	0.0566	0.50974		-0.1864	0.0382	-1.2126	0.0419	-1.3674	0.0589	-0.6009	0.0574	-0.4762	0.059	-0.7687		-0.0261	0.0128	-0.0605	0.0173	-0.3263	0.0216	-0.1711	0.0157	-0.1998	0.0135	-0.15676		0.4331	0.0345	0.7783	0.0532	-1.273	0.0759	-1.1218	0.062	-0.8985	0.0605	-0.41638
	VAL-257	3.1847	0.0409	3.5613	0.0722	2.6306	0.0585	1.8354	0.053	1.9495	0.0576	2.6323		-1.7811	0.0389	-1.478	0.0748	-2.1292	0.0486	-2.069	0.0646	-1.7943	0.0716	-1.85032		-0.0451	0.0175	-0.0166	0.0202	0.0031	0.0217	0.0188	0.0172	-0.052	0.0168	-0.01836		1.3601	0.036	2.0639	0.0346	0.5061	0.0388	-0.2175	0.0385	0.1062	0.0484	0.76376
	ASP-258	-61.429	0.6132	-37.2846	2.0629	-95.7072	0.6039	-80.4967	0.6986	-84.112	0.7101	-71.8059		48.5922	0.9077	13.6969	2.2449	93.0083	1.102	72.6367	0.9335	63.1541	1.0465	58.2176		-1.3899	0.0221	-0.9757	0.0272	-1.9088	0.0195	-1.8432	0.0162	-1.7988	0.0198	-1.58328		-14.2724	0.6379	-24.5928	0.8262	-4.6197	0.8683	-9.6973	0.7692	-22.7429	0.8533	-15.185
	ASP-259	-14.8367	0.6051	-0.2175	0.6676	-24.5091	0.3855	-30.6611	0.5556	-27.8671	0.5514	-19.6183		8.4294	0.7616	-10.5136	0.5527	0.5938	0.3723	14.9292	0.6814	10.9321	0.7838	4.87418		-0.5565	0.022	-0.0669	0.0135	-0.198	0.0163	-0.2461	0.0141	-0.4492	0.0147	-0.30334		-6.9814	0.415	-10.7649	0.5536	-24.1077	0.2718	-15.9201	0.4394	-17.3819	0.4582	-15.0312
	LEU-260	0.0009	0.055	0.7247	0.0412	-4.2793	0.0999	-4.6345	0.1229	-6.2143	0.1042	-2.8805		-0.782	0.0621	-0.3912	0.0681	1.9289	0.0782	1.9989	0.0954	2.1659	0.099	0.9841		-0.1837	0.024	-0.1102	0.0232	-0.1176	0.0193	-0.1265	0.0211	-0.2764	0.0211	-0.16288		-0.9607	0.0542	0.2235	0.0649	-2.4718	0.0749	-2.7564	0.0716	-4.3235	0.0779	-2.05778
	GLU-261	6.5419	0.2926	5.4526	0.3183	6.1446	0.3225	7.065	0.47	-0.2633	0.3907	4.98816		-4.1591	0.2301	-2.5974	0.2763	-5.8066	0.2593	-7.5534	0.367	-3.8187	0.2631	-4.78704		-0.4446	0.016	-0.0903	0.0164	-0.7114	0.0167	-0.7193	0.0163	-0.6293	0.0135	-0.51898		1.9421	0.3159	2.7966	0.4105	-0.3731	0.3551	-1.2275	0.3715	-4.7213	0.3551	-0.31664
	LEU-262	0.8551	0.0764	-0.3799	0.0988	-1.7305	0.1218	-0.2988	0.1572	1.643	0.1333	0.01778		-0.6294	0.1036	1.4955	0.1114	1.8031	0.112	-0.5167	0.1562	0.9062	0.1286	0.61174		-0.2735	0.0197	-0.3933	0.0234	-0.341	0.0194	-0.4	0.0195	-0.4454	0.0175	-0.37064		-0.0465	0.0665	0.7148	0.0762	-0.263	0.0997	-1.2166	0.0963	2.1115	0.1015	0.26004
	THR-263	-3.8336	0.0695	-3.9299	0.0735	-5.64	0.0773	-5.9897	0.0949	-4.3069	0.0681	-4.74002		-0.6445	0.0702	-0.294	0.0724	0.6927	0.0865	1.4836	0.1128	0.2574	0.082	0.29904		0.0054	0.0105	-0.0284	0.0127	-0.1653	0.0155	-0.1556	0.0175	-0.0001	0.0115	-0.0688		-4.476	0.0593	-4.2508	0.0625	-5.111	0.0796	-4.6622	0.0756	-4.0524	0.061	-4.51048
	VAL-264	-15.9759	0.1729	-15.0818	0.1658	-13.1226	0.1356	-14.4256	0.1329	-11.4276	0.1216	-14.0067		3.7925	0.1058	3.4641	0.0936	2.4401	0.057	2.9451	0.0952	1.6785	0.0924	2.86406		-1.6047	0.0177	-1.5277	0.021	-1.4629	0.017	-1.4064	0.0185	-0.9415	0.0217	-1.38864		-13.7844	0.1401	-13.143	0.1476	-12.1448	0.118	-12.8912	0.1086	-10.6955	0.1194	-12.5318
	ARG-265	-53.3121	0.4545	-53.2249	0.4833	-44.0011	0.449	-43.5434	0.5128	-43.912	0.4542	-47.5987		86.1778	0.5614	91.5686	0.5388	83.382	0.4798	84.8374	0.5217	80.0727	0.4785	85.2077		-2.2865	0.0214	-2.1957	0.0227	-2.2467	0.0186	-2.2097	0.0223	-2.0757	0.0225	-2.20286		30.5833	0.4255	36.1244	0.4136	37.1309	0.4167	39.1074	0.4665	34.0827	0.365	35.4057
	SER-266	-4.9345	0.0503	-4.6337	0.0465	-5.1756	0.0394	-4.8008	0.0467	-4.0702	0.0382	-4.72296		1.3554	0.0392	1.241	0.0446	1.3934	0.0433	1.5043	0.0475	0.9972	0.0375	1.29826		0.0305	0.0162	0.0402	0.0152	0.0621	0.016	0.0019	0.0119	-0.0094	0.013	0.02506		-3.5465	0.0433	-3.3535	0.0429	-3.7186	0.0357	-3.2985	0.0315	-3.0827	0.0356	-3.39996
	ALA-267	-8.9266	0.0763	-9.346	0.0846	-8.0771	0.0671	-7.9421	0.0774	-9.6164	0.0729	-8.78164		3.9801	0.0677	3.9871	0.0727	3.3233	0.061	3.6282	0.0692	3.4649	0.0613	3.67672		-0.0309	0.0144	-0.2246	0.0206	-0.0854	0.015	-0.2095	0.0149	-0.2238	0.015	-0.15484		-4.9767	0.0507	-5.5821	0.0836	-4.8374	0.0583	-4.5252	0.0527	-6.374	0.0675	-5.25908
	ASN-268	-23.456	0.2288	-25.6594	0.1977	-22.8725	0.146	-22.1011	0.1559	-24.8496	0.1698	-23.7877		30.4515	0.223	30.3879	0.1921	25.8048	0.2253	26.4488	0.1849	27.1206	0.2044	28.0427		-2.1146	0.0169	-2.148	0.0159	-1.9923	0.0174	-2.0851	0.0191	-2.1924	0.0157	-2.10648		4.8846	0.2708	2.5785	0.2343	0.9293	0.2209	2.2627	0.2119	0.0686	0.2574	2.14474
	CYS-269	-9.9196	0.0944	-10.1039	0.1054	-9.902	0.148	-9.2436	0.105	-14.0479	0.1218	-10.6434		1.5648	0.0913	1.7109	0.1096	1.7485	0.1271	1.3206	0.1135	6.9301	0.0882	2.65498		-0.4435	0.0157	-0.477	0.0154	-0.4566	0.015	-0.4804	0.0128	-0.5094	0.012	-0.47338		-8.8	0.0702	-8.8642	0.0656	-8.6076	0.0782	-8.3986	0.0725	-7.6253	0.1059	-8.45914
	LEU-270	-7.2212	0.0751	-7.7895	0.0615	-6.7926	0.068	-5.0933	0.0765	-6.0443	0.1105	-6.58818		4.5776	0.0738	5.4525	0.0635	4.3777	0.0827	3.0712	0.0721	3.5183	0.1213	4.19946		-0.0345	0.0205	-0.0162	0.0182	-0.0071	0.0165	-0.035	0.0141	-0.0118	0.0209	-0.02092		-2.6742	0.038	-2.3537	0.0342	-2.4205	0.038	-2.0582	0.0388	-2.5358	0.0505	-2.40848
	LYS-271	-55.8231	1.0585	-48.2465	1.3608	1.0828	0.8478	-2.7627	0.7514	-14.6384	0.8351	-24.0776		115.837	1.741	125.595	2.8446	71.4293	1.7895	78.0922	1.0481	100.03	1.2025	98.1966		-1.9533	0.0269	-2.1649	0.0339	-1.9353	0.0231	-1.9593	0.022	-2.2632	0.0264	-2.0552		58.0661	1.0159	75.2019	1.8108	70.6479	1.2116	73.3993	0.7029	83.1413	0.7431	72.0913
	ALA-272	-18.7815	0.3344	-15.494	0.2366	-14.807	0.2552	-8.9727	0.246	-12.8685	0.2198	-14.1847		12.0253	0.4266	7.675	0.3061	7.4906	0.3204	3.039	0.2154	4.8822	0.2605	7.02242		-1.3997	0.0206	-1.0098	0.0229	-0.8929	0.0247	-0.5659	0.0242	-0.9321	0.0139	-0.96008		-8.1448	0.1683	-8.8459	0.1128	-8.2243	0.1151	-6.4919	0.137	-8.9245	0.1278	-8.12628
	GLU-273	-94.9548	0.825	-93.7102	0.5548	-85.9578	0.5856	-84.9742	0.5062	-67.0472	0.7604	-85.3288		73.3734	0.8538	73.3423	0.647	59.4135	0.5746	60.4174	0.4615	16.7241	0.9218	56.6541		-1.1288	0.015	-1.1359	0.0132	-1.1239	0.012	-1.1931	0.0125	-0.1293	0.0183	-0.9422		-22.7044	0.547	-21.5113	0.499	-27.6753	0.5239	-25.7053	0.5025	-50.4486	0.3985	-29.609
	ALA-274	-1.161	0.0657	-4.644	0.0716	-4.9283	0.0666	-2.4379	0.0867	-0.489	0.0751	-2.73204		0.5995	0.0537	3.2262	0.0727	3.1558	0.0815	0.647	0.0737	0.5071	0.059	1.62712		0.0104	0.011	-0.0172	0.0081	-0.0088	0.0089	-0.004	0.0079	-0.0207	0.0075	-0.00806		-0.553	0.0258	-1.4335	0.0387	-1.782	0.041	-1.8019	0.0466	-0.0016	0.051	-1.1144
	ILE-275	0.0444	0.0569	0.7	0.0513	0.2658	0.0394	0.1634	0.0562	-1.9476	0.1287	-0.1548		-0.1714	0.0411	-0.6162	0.0424	0.1011	0.0378	0.1502	0.0531	1.4164	0.1312	0.17602		-0.0135	0.0179	-0.0291	0.0146	-0.0202	0.0129	0.0334	0.0136	-0.0396	0.0211	-0.0138		-0.1427	0.0426	0.0569	0.0353	0.3483	0.0395	0.3451	0.0409	-0.5686	0.0576	0.0078
	HIS-276	-15.4265	0.411	-17.3961	0.3177	-18.1006	0.3449	-14.5091	0.5605	-5.3114	0.6095	-14.1487		17.4644	0.6521	20.5307	0.4954	22.6795	0.6058	19.9541	0.8199	5.78	0.7651	17.2817		-0.4408	0.0216	-0.4033	0.016	-0.4642	0.0182	-0.4688	0.02	-0.2039	0.0196	-0.3962		1.603	0.2628	2.7345	0.2286	4.1008	0.2953	4.9519	0.3189	0.3063	0.2283	2.7393
	TYR-277	-0.647	0.1222	-0.2157	0.1242	-1.4891	0.1324	-1.3271	0.0941	-0.7954	0.0582	-0.89486		-0.2603	0.0821	-0.4747	0.0792	0.5308	0.1123	0.9015	0.099	0.392	0.0652	0.21786		-0.0081	0.0183	-0.0365	0.0165	-0.0223	0.013	0.0067	0.014	-0.0205	0.0128	-0.01614		-0.9239	0.1186	-0.7291	0.085	-0.9793	0.1145	-0.4192	0.0849	-0.4257	0.0805	-0.69544
	ILE-278	0.6371	0.0187	0.3377	0.0309	0.6331	0.0192	0.3997	0.0211	-0.0393	0.0207	0.39366		-0.3405	0.0082	-0.179	0.0185	-0.5162	0.0137	-0.6143	0.0209	-0.3074	0.0174	-0.39148		-0.0493	0.0191	-0.015	0.0162	0.0941	0.017	0.1309	0.0171	-0.045	0.0192	0.02314		0.2473	0.0248	0.143	0.0256	0.2111	0.0236	-0.0837	0.0221	-0.3919	0.0226	0.02516
	GLY-279	1.0424	0.0148	0.7252	0.0235	0.9306	0.0157	0.6669	0.0187	0.5478	0.0196	0.78258		-0.3617	0.0132	-0.2858	0.013	-0.4247	0.0107	-0.4387	0.0153	-0.2868	0.0152	-0.35954		0.0293	0.0108	-0.0066	0.0051	0.005	0.0053	0.0047	0.0047	-0.0237	0.0064	0.00174		0.71	0.0206	0.4325	0.0159	0.5113	0.0148	0.2324	0.0126	0.2372	0.0128	0.42468
	ASP-280	-40.6543	0.2178	-42.1936	0.3045	-45.9898	0.2717	-39.7289	0.2686	-42.1902	0.4018	-42.1514		2.6269	0.139	4.2273	0.2181	5.1692	0.1707	4.0441	0.154	4.3458	0.2712	4.08266		-0.0026	0.0075	-0.0091	0.0091	-0.0053	0.0082	0.0125	0.0082	-0.0076	0.0062	-0.00242		-38.0424	0.1918	-37.9631	0.2787	-40.8201	0.1973	-35.6536	0.1905	-37.8496	0.2114	-38.0658
	LEU-281	0.4088	0.0184	0.2526	0.0255	0.5697	0.0177	0.3442	0.0175	0.1681	0.0211	0.34868		-0.37	0.0097	-0.3319	0.0169	-0.5372	0.0113	-0.5276	0.0146	-0.3394	0.0168	-0.42122		-0.0816	0.0238	-0.0105	0.0264	0.0269	0.02	0.0458	0.0235	-0.119	0.0257	-0.02768		-0.0428	0.0297	-0.0883	0.0305	0.0593	0.0259	-0.1376	0.0267	-0.2899	0.0301	-0.09986
	VAL-282	0.6398	0.009	0.4793	0.0157	0.6888	0.0102	0.4988	0.0123	0.4728	0.0126	0.5559		-0.2082	0.0063	-0.1548	0.0099	-0.3054	0.0072	-0.2915	0.0092	-0.2114	0.0112	-0.23426		-0.0339	0.0174	-0.0241	0.0149	0.0847	0.0182	0.0701	0.0164	-0.0445	0.0158	0.01046		0.3981	0.0196	0.3012	0.0203	0.4689	0.0208	0.2777	0.0188	0.2155	0.0171	0.33228
	GLN-283	0.2805	0.0399	0.4048	0.0417	-0.26	0.0245	-0.3613	0.0204	-0.287	0.0345	-0.0446		-0.386	0.071	-0.3985	0.0721	-0.0636	0.0386	-0.0389	0.0408	0.1736	0.0226	-0.14268		0.004	0.0131	0.0383	0.0127	-0.0138	0.0124	0.0119	0.0125	0.0084	0.0088	0.00976		-0.0993	0.0806	0.0479	0.0764	-0.3349	0.046	-0.3879	0.0417	-0.1061	0.0383	-0.17606
	ARG-284	37.8487	0.2224	38.091	0.2331	40.745	0.2462	37.5368	0.2344	40.2765	0.2889	38.8996		-1.0106	0.1119	-0.4531	0.111	-1.498	0.1113	-1.4814	0.1135	-1.9754	0.1619	-1.2837		-0.0417	0.0191	-0.0451	0.0182	0.0144	0.0208	0.0501	0.0191	-0.0186	0.0202	-0.00818		36.7936	0.2042	37.589	0.2156	39.265	0.2086	36.1081	0.1948	38.287	0.2053	37.6085
	THR-285	0.008	0.0084	-0.0157	0.0082	-0.1668	0.0091	-0.1979	0.0098	-0.1378	0.0095	-0.10204		-0.1231	0.0345	-0.2698	0.0332	-0.0214	0.0342	-0.0307	0.0386	0.0103	0.032	-0.08694		-0.0091	0.0075	0.0115	0.0093	-0.0339	0.0108	-0.0126	0.0096	-0.0245	0.0085	-0.01372		-0.1233	0.0348	-0.2723	0.0337	-0.2212	0.0365	-0.24	0.039	-0.1522	0.0335	-0.2018
	GLU-286	-20.5577	0.1343	-21.5128	0.1632	-24.5696	0.1446	-22.6651	0.1576	-23.2449	0.1372	-22.51		-1.5824	0.1484	-1.5785	0.1601	-0.2796	0.1243	-0.2572	0.1516	0.1411	0.138	-0.71132		0.0136	0.0147	0.0162	0.0135	-0.0001	0.0127	-0.0346	0.0153	-0.0268	0.0157	-0.00634		-22.1247	0.1798	-23.0828	0.2269	-24.8541	0.1618	-22.9599	0.213	-23.1352	0.175	-23.2313
	VAL-287	-0.029	0.0125	-0.0909	0.0133	-0.1974	0.011	-0.2589	0.0118	-0.1992	0.0139	-0.15508		-0.3537	0.0194	-0.3512	0.0206	-0.29	0.0133	-0.2544	0.0222	-0.225	0.0193	-0.29486		-0.0198	0.0129	0.0142	0.0118	-0.0121	0.0139	0.0126	0.0129	-0.0271	0.0149	-0.00644		-0.4031	0.025	-0.4276	0.0244	-0.499	0.0208	-0.5023	0.0283	-0.4522	0.0252	-0.45684
	GLU-288	-29.9293	0.1576	-30.4141	0.1768	-33.1906	0.1659	-31.3608	0.168	-32.0845	0.1922	-31.3959		-0.958	0.1417	-1.0292	0.1499	0.4138	0.1161	0.1957	0.1366	0.728	0.1145	-0.12994		-0.0148	0.0134	-0.0136	0.0132	0.0211	0.0135	0.0258	0.0102	0.0363	0.0149	0.01096		-30.9033	0.2261	-31.4516	0.2308	-32.7539	0.1895	-31.1329	0.2054	-31.324	0.2028	-31.5131
	LEU-289	-0.2401	0.0277	-0.1732	0.0265	-0.3198	0.0243	-0.3673	0.025	-0.3421	0.0329	-0.2885		-1.0251	0.0199	-1.0958	0.0188	-0.8172	0.0158	-0.8073	0.0164	-0.8724	0.023	-0.92356		-0.0815	0.0205	-0.0262	0.0242	-0.0329	0.0195	0.0473	0.0195	-0.0419	0.0248	-0.02704		-1.3469	0.0293	-1.2949	0.0291	-1.1702	0.0255	-1.1247	0.027	-1.2586	0.0319	-1.23906
	LEU-290	0.8576	0.0181	0.9075	0.0199	0.6429	0.0178	0.5066	0.0189	0.6817	0.0206	0.71926		-0.7341	0.0391	-0.8847	0.0387	-0.6196	0.0345	-0.5508	0.039	-0.5341	0.0337	-0.66466		-0.0354	0.0194	0.0182	0.0247	-0.0435	0.0267	0.0258	0.0266	0.0048	0.0207	-0.00602		0.0848	0.0404	0.0375	0.0478	-0.022	0.0416	-0.0182	0.0482	0.1523	0.0401	0.04688
	LYS-291	30.4584	0.2352	31.0148	0.2713	30.8643	0.2064	31.2612	0.1882	32.1155	0.2003	31.1428		0.8166	0.1768	1.1634	0.2121	1.7015	0.1796	1.58	0.1771	1.9593	0.1781	1.44416		-0.0206	0.0123	0.0036	0.0106	0.0016	0.0128	0.0094	0.0097	-0.024	0.0116	-0.006		31.2549	0.3082	32.1701	0.3078	32.5705	0.2661	32.8434	0.2413	34.0548	0.2629	32.5787
	THR-292	-2.1851	0.098	-1.6518	0.0816	-0.6837	0.0475	-0.9668	0.0464	-2.5185	0.1163	-1.60118		1.5714	0.0999	1.3112	0.0826	-0.3045	0.0584	-0.2086	0.0575	1.5789	0.1626	0.78968		-0.1632	0.0149	0	0.0091	-0.0257	0.0085	0.0073	0.0082	-0.068	0.0134	-0.04992		-0.7768	0.073	-0.3412	0.0688	-1.0163	0.0496	-1.1655	0.0522	-1.0027	0.0953	-0.8605
	PRO-293	-6.3111	0.1551	-6.2024	0.1503	-1.3602	0.1237	-2.7749	0.1252	-6.113	0.1569	-4.55232		-1.3598	0.0829	-1.3083	0.0841	-1.9664	0.0787	-1.5427	0.0782	-1.1469	0.0834	-1.46482		-1.1999	0.0156	-0.9751	0.0162	-0.6743	0.0159	-0.7635	0.0193	-1.0677	0.0186	-0.9361		-8.8756	0.1271	-8.4851	0.1308	-3.998	0.12	-5.073	0.1303	-8.3216	0.1528	-6.95066
	ASN-294	1.4931	0.1844	2.0773	0.1837	3.6255	0.1341	3.1247	0.1409	-5.0797	0.2316	1.04818		-10.4555	0.2087	-11.1337	0.1941	-11.7224	0.1537	-11.4888	0.155	4.8267	0.2644	-7.99474		-0.7509	0.0169	-0.6568	0.0159	-0.397	0.0143	-0.4461	0.0128	-1.0972	0.0155	-0.6696		-9.7066	0.1692	-9.7144	0.183	-8.4903	0.1276	-8.8077	0.1398	-1.3498	0.2346	-7.61376
	LEU-295	-0.4098	0.0813	-0.3713	0.0884	0.2481	0.0689	0.5816	0.0745	0.4892	0.0682	0.10756		-0.6366	0.0958	-0.8463	0.1032	-1.5276	0.0893	-1.9596	0.1021	-1.6367	0.0771	-1.32136		0.0078	0.0228	-0.0078	0.0247	0.0591	0.0206	0.0021	0.0202	0.0152	0.022	0.01528		-1.0404	0.0474	-1.2242	0.0462	-1.2181	0.0471	-1.3708	0.05	-1.1325	0.0472	-1.1972
	GLY-296	-0.9741	0.0532	-1.0162	0.0498	-0.8984	0.0314	-0.5712	0.0352	-0.4706	0.0202	-0.7861		0.3372	0.0682	0.4095	0.0653	0.1286	0.0327	0.0383	0.0375	-0.0984	0.0227	0.16304		-0.002	0.0059	-0.004	0.0056	-0.0003	0.006	0.0091	0.0069	-0.016	0.0066	-0.00264		-0.6385	0.0259	-0.6103	0.0244	-0.7685	0.0181	-0.5247	0.0208	-0.5846	0.015	-0.62532
	LYS-297	15.3247	0.2093	17.6527	0.2722	19.2627	0.2248	19.813	0.247	20.0715	0.2139	18.4249		1.6471	0.1902	2.2313	0.2128	2.1681	0.1644	2.0529	0.1799	3.252	0.1702	2.27028		-0.0291	0.0124	-0.0002	0.0136	-0.0418	0.0178	-0.036	0.017	-0.0578	0.0149	-0.03298		16.9496	0.2675	19.8854	0.2952	21.3799	0.3016	21.8202	0.3217	23.2648	0.2714	20.66
	LYS-298	-2.3401	0.4105	4.9318	0.4379	7.5585	0.486	9.1743	0.5294	11.4931	0.3955	6.16352		6.0664	0.4169	7.672	0.3103	5.2272	0.4681	5.8667	0.3134	5.8537	0.1956	6.1372		-0.0435	0.0142	-0.0505	0.0106	-0.0622	0.0122	-0.0689	0.0123	-0.0357	0.0108	-0.05216		3.6731	0.3699	12.5411	0.3751	12.7467	0.5539	14.9539	0.4194	17.3205	0.3565	12.2471
	SER-299	-1.6901	0.0645	-1.4909	0.0603	-2.1987	0.0554	-1.2556	0.0566	-1.4563	0.0418	-1.61832		0.832	0.075	1.0644	0.0765	1.2183	0.0695	0.7468	0.0775	1.021	0.0583	0.9765		0.0156	0.0123	-0.005	0.0146	0.0482	0.0165	-0.0068	0.0134	0.0094	0.0134	0.01228		-0.8439	0.0453	-0.4295	0.0532	-0.9357	0.0515	-0.5178	0.0595	-0.4257	0.0473	-0.63052
	LEU-300	-0.7679	0.0112	-0.6507	0.0153	-0.7363	0.0127	-0.6058	0.0157	-0.4879	0.0117	-0.64972		0.6902	0.0132	0.6575	0.0123	0.7642	0.014	0.7188	0.0157	0.6572	0.0145	0.69758		-0.0033	0.0156	0.0051	0.0151	-0.0172	0.0168	-0.0135	0.0169	0.0105	0.017	-0.00368		-0.081	0.0208	0.0131	0.0184	0.011	0.0215	0.0994	0.0234	0.1806	0.0209	0.04462
	THR-301	-0.1453	0.0162	-0.1994	0.0189	0.022	0.0169	-0.0433	0.0184	0.0079	0.0136	-0.07162		0.4296	0.048	0.8608	0.0605	0.6809	0.0412	0.706	0.0406	0.7487	0.0367	0.6852		0.0118	0.0098	-0.0312	0.0112	0.023	0.0122	-0.003	0.0132	-0.0485	0.0117	-0.00958		0.296	0.0516	0.6301	0.0559	0.7269	0.0469	0.659	0.0489	0.7075	0.0388	0.6039
	GLU-302	4.6817	0.247	-0.136	0.315	-3.7044	0.3521	-3.5334	0.4369	-6.7453	0.2935	-1.88748		-13.2783	0.2058	-12.9985	0.2238	-6.7739	0.2263	-10.7917	0.3491	-8.4233	0.1939	-10.4531		0.0105	0.0094	-0.0286	0.0115	0.0136	0.0098	0.006	0.009	-0.0075	0.009	-0.0012		-8.5806	0.2236	-13.1743	0.2672	-10.4514	0.2498	-14.3395	0.2775	-15.1718	0.2469	-12.3435
	ILE-303	-0.3142	0.0148	-0.1738	0.0145	-0.2338	0.014	-0.1839	0.0147	-0.1665	0.0119	-0.21444		0.5346	0.0102	0.5359	0.0089	0.4671	0.0077	0.4815	0.0079	0.4126	0.0092	0.48634		-0.0863	0.0225	-0.0288	0.0208	0.0855	0.0177	0.0958	0.0193	0.0702	0.0184	0.02728		0.1348	0.0248	0.3343	0.0222	0.3188	0.0211	0.3923	0.0223	0.3168	0.0214	0.2994
	LYS-304	16.1283	0.1311	18.2252	0.1643	19.7868	0.159	19.3424	0.1527	20.4646	0.1484	18.7895		1.8641	0.1867	1.8112	0.1728	1.2674	0.1639	1.5677	0.1532	1.7358	0.1659	1.64924		0.0207	0.0148	-0.0069	0.0146	0.0099	0.0136	0.0088	0.0145	0.0193	0.0128	0.01036		18.0202	0.2057	20.043	0.2148	21.0659	0.2272	20.9161	0.2016	22.2268	0.1938	20.4544
	ASP-305	-8.9819	0.1601	-11.7333	0.177	-11.335	0.1629	-12.2077	0.2003	-15.1255	0.1687	-11.8767		-0.7583	0.1607	-0.7168	0.184	0.7035	0.1729	0.5343	0.1701	1.293	0.171	0.21114		0.0152	0.0084	0.0126	0.0063	0.0271	0.0074	0.0256	0.0085	0.0422	0.007	0.02454		-9.7374	0.23	-12.4399	0.2603	-10.611	0.2515	-11.6507	0.2705	-13.7943	0.2206	-11.6467
	VAL-306	-0.3057	0.0127	-0.0923	0.0114	-0.1319	0.0176	-0.2154	0.015	-0.1607	0.0109	-0.1812		0.5333	0.0157	0.4731	0.0157	0.295	0.0155	0.3969	0.017	0.426	0.0164	0.42486		0.005	0.0171	-0.0255	0.0137	-0.0431	0.0125	-0.0048	0.0109	-0.0082	0.014	-0.01532		0.2316	0.0252	0.3552	0.0211	0.1207	0.0244	0.1765	0.0254	0.2563	0.023	0.22806
	LEU-307	-0.2388	0.0098	-0.114	0.0087	-0.0315	0.0098	-0.0556	0.0102	-0.0531	0.0075	-0.0986		0.3024	0.0058	0.264	0.0058	0.1447	0.0055	0.1922	0.0056	0.2209	0.0068	0.22484		-0.0643	0.0205	-0.0274	0.0191	0.0651	0.0213	0.029	0.0184	-0.0569	0.0192	-0.0109		-0.0004	0.0225	0.1221	0.0214	0.1783	0.0231	0.1654	0.0204	0.1115	0.0218	0.11538
	ALA-308	-0.2583	0.0075	-0.206	0.0076	-0.1034	0.0095	-0.1077	0.011	-0.0709	0.0071	-0.14926		0.1813	0.0307	0.181	0.0291	0.2506	0.025	0.1632	0.0239	0.2069	0.0147	0.1966		-0.0039	0.0085	-0.0043	0.0078	0.0281	0.0072	0.0295	0.0073	0.0086	0.0081	0.0116		-0.0802	0.0316	-0.0277	0.0307	0.1756	0.0271	0.0848	0.0247	0.1451	0.0164	0.05952
	SER-309	-0.4048	0.0166	-0.3276	0.0228	-0.298	0.0312	-0.3371	0.02	-0.2002	0.0154	-0.31354		0.5829	0.088	0.2507	0.0823	0.6572	0.074	0.6089	0.0742	0.9226	0.0717	0.60446		0.0129	0.0056	0.0133	0.0057	-0.0167	0.0053	-0.0147	0.0048	0.0164	0.0064	0.00224		0.1904	0.09	-0.058	0.0817	0.3438	0.0814	0.2597	0.0755	0.7392	0.0729	0.29502
	ARG-310	8.3228	0.2571	6.5377	0.2924	16.4449	0.2289	16.4923	0.2848	16.6695	0.2805	12.8934		1.2493	0.1523	3.1949	0.181	-0.8553	0.1191	-1.7644	0.1689	-0.1378	0.1608	0.33734		0.0242	0.0183	-0.0327	0.0191	-0.0032	0.0173	0.0614	0.0158	-0.0731	0.0176	-0.00468		9.6022	0.2093	9.7105	0.2559	15.5896	0.1927	14.7982	0.2329	16.4592	0.2088	13.2319
	GLY-311	-0.4809	0.007	-0.4178	0.0062	-0.3461	0.0074	-0.2897	0.0078	-0.206	0.0062	-0.3481		0.1404	0.0472	0.0508	0.0445	0.2067	0.0364	0.1463	0.0391	0.2851	0.0345	0.16586		-0.0057	0.0061	-0.003	0.0068	0.0056	0.0068	0.0032	0.006	0.0025	0.0056	0.00052		-0.3465	0.0475	-0.3706	0.0445	-0.1331	0.0386	-0.1406	0.0391	0.0824	0.0349	-0.18168
	LEU-312	0.2083	0.0052	0.1238	0.0054	0.2118	0.0053	0.1579	0.0066	0.1034	0.0056	0.16104		-0.0323	0.0211	-0.0647	0.0226	0.0217	0.0148	0.0029	0.0165	0.0469	0.0164	-0.0051		0.0321	0.0222	-0.0525	0.0222	0.0417	0.0223	0.0341	0.0224	0.025	0.0206	0.01608		0.209	0.0286	0.0068	0.0318	0.2764	0.0258	0.1937	0.0271	0.1751	0.0284	0.1722
	SER-313	-0.1964	0.0135	-0.164	0.0118	-0.2437	0.0128	-0.2186	0.0107	-0.168	0.0105	-0.19814		0.056	0.0582	0.2248	0.0793	0.2395	0.0488	0.1978	0.056	0.5317	0.0554	0.24996		-0.0027	0.0115	-0.0312	0.0128	-0.0034	0.0126	-0.0202	0.0118	-0.0039	0.0105	-0.01228		-0.145	0.0606	0.0274	0.0821	-0.0071	0.0517	-0.041	0.0568	0.3595	0.0575	0.03876
	LEU-314	-0.0046	0.0042	-0.014	0.0055	0.0979	0.0056	0.0697	0.0059	0.0602	0.0054	0.04184		0.2285	0.0353	0.2146	0.0392	0.1605	0.0327	0.2156	0.0395	0.4046	0.0402	0.24476		-0.0154	0.0194	-0.0082	0.0217	0.033	0.0187	0.0232	0.0212	0.0083	0.0209	0.00818		0.2081	0.0403	0.1945	0.0437	0.2926	0.0368	0.3094	0.0444	0.4742	0.0451	0.29576
	GLY-315	0.2318	0.0133	0.1612	0.0145	0.3614	0.0141	0.279	0.0114	0.2338	0.011	0.25344		0.0773	0.0299	0.0124	0.0304	0.071	0.0288	0.0855	0.0274	0.2528	0.0323	0.0998		-0.0062	0.0062	0.0077	0.0072	-0.0353	0.0099	-0.0232	0.0108	-0.0109	0.007	-0.01358		0.3035	0.0328	0.181	0.0348	0.3956	0.0308	0.3404	0.0319	0.477	0.0335	0.3395
	MET-316	-0.0645	0.013	-0.0788	0.0134	-0.1036	0.0142	-0.0543	0.0126	-0.0725	0.0115	-0.07474		0.0404	0.0201	-0.0143	0.0218	0.2044	0.0199	0.1761	0.0209	0.2788	0.0235	0.13708		-0.0009	0.0141	-0.026	0.0148	-0.0048	0.0154	-0.0212	0.0131	-0.0199	0.0129	-0.01456		-0.0245	0.0264	-0.1192	0.0289	0.097	0.0274	0.1003	0.0287	0.1853	0.0294	0.04778
	ARG-317	27.0175	0.1505	27.797	0.1799	30.3914	0.1445	27.4043	0.1775	28.9978	0.164	28.3216		-0.2019	0.1037	0.2941	0.1149	-0.2752	0.0802	0.0723	0.0841	0.3621	0.0857	0.05028		-0.0189	0.0114	0.0326	0.0113	-0.0014	0.0158	0.0122	0.0147	0.022	0.0144	0.0093		26.7933	0.1818	28.1271	0.1783	30.1199	0.1651	27.4919	0.1808	29.3805	0.1704	28.3825
	LEU-318	-0.5339	0.0075	-0.4314	0.0103	-0.5058	0.0053	-0.4002	0.0058	-0.3717	0.0071	-0.4486		0.0317	0.0116	0.0957	0.0077	0.0326	0.0092	0.0343	0.01	0.0191	0.0096	0.04268		0.0034	0.0204	-0.0247	0.0154	0.025	0.0188	-0.0146	0.019	0.0046	0.0176	-0.00126		-0.4987	0.0246	-0.3606	0.0184	-0.4478	0.0216	-0.3802	0.02	-0.3475	0.0207	-0.40696
	GLU-319	-26.6611	0.1612	-30.4654	0.1696	-23.9713	0.1376	-22.4309	0.1297	-22.8356	0.1511	-25.2729		0.6714	0.2037	1.6883	0.2428	1.331	0.1379	1.1977	0.1555	1.4184	0.1253	1.26136		-0.0206	0.0106	0.0311	0.0112	0.0231	0.0102	0.0014	0.0111	0.0067	0.0091	0.00834		-26.0026	0.2623	-28.7485	0.3184	-22.6141	0.188	-21.2387	0.1921	-21.4029	0.1894	-24.0014
	ASN-320	1.1564	0.0354	1.5004	0.0331	-0.0456	0.0296	-0.0291	0.0284	0.0087	0.0322	0.51816		-0.4552	0.0556	-0.6296	0.0425	0.2275	0.0667	0.2548	0.0642	0.5916	0.0661	-0.00218		0.012	0.01	-0.0065	0.0074	0.0005	0.0088	0.0052	0.0078	-0.0163	0.0086	-0.00102		0.7122	0.0623	0.8671	0.0442	0.1782	0.0713	0.2299	0.0662	0.5852	0.0661	0.51452
	TRP-321	-0.963	0.0315	-1.2605	0.0246	-0.1737	0.0145	-0.5955	0.0179	-0.4619	0.0155	-0.69092		0.022	0.0595	0.4608	0.0767	0.1786	0.0437	0.2928	0.0478	0.2868	0.0467	0.2482		-0.0178	0.0107	0.0223	0.0159	0.0058	0.0117	0.0004	0.0093	0.004	0.0082	0.00294		-0.9594	0.0709	-0.7707	0.0831	0.0107	0.0478	-0.298	0.0556	-0.171	0.0504	-0.43768
	PRO-322	0.2419	0.0211	0.1175	0.0237	0.4524	0.0086	0.3897	0.0068	0.3856	0.0066	0.31742		0.1246	0.014	0.1567	0.0195	0.0206	0.0028	0.0256	0.0045	0.022	0.0047	0.0699		-0.0224	0.0153	-0.0128	0.0153	0.0115	0.0143	0.0064	0.0106	-0.0142	0.0109	-0.0063		0.3435	0.0243	0.262	0.0264	0.4843	0.0162	0.4211	0.013	0.3935	0.0134	0.38088
	PRO-323	-1.4671	0.0351	-1.0388	0.0441	-0.3547	0.0126	-0.2768	0.0106	-0.4383	0.0128	-0.71514		0.3859	0.0364	0.2595	0.0311	-0.1227	0.0046	-0.1019	0.0054	-0.0448	0.0049	0.0752		0.001	0.0143	-0.001	0.0081	-0.0078	0.0111	0.0093	0.011	0.0209	0.0143	0.00448		-1.0804	0.0481	-0.7809	0.0401	-0.4871	0.0156	-0.3701	0.015	-0.4616	0.0187	-0.63602
	ALA-324	-3.1763	0.0775	-3.4111	0.2442	0.2223	0.0256	0.2617	0.0204	0.0565	0.0169	-1.20938		0.8196	0.0709	2.4764	0.2404	-0.2475	0.0318	-0.1501	0.0295	0.027	0.0273	0.58508		0.0085	0.0096	-0.0329	0.0109	-0.0044	0.0115	-0.0118	0.0104	-0.0362	0.0105	-0.01536		-2.3498	0.0511	-0.9716	0.0834	-0.0275	0.0398	0.0977	0.0362	0.0473	0.0307	-0.64078
	SER-325	-0.061	0.0693	-2.5583	0.3688	-0.147	0.0417	-0.1193	0.0333	-0.7784	0.0472	-0.7328		-0.0702	0.0672	3.2349	0.4436	-0.5169	0.0666	-0.2691	0.0616	0.0815	0.0619	0.49204		-0.017	0.0097	-0.1131	0.0162	0.0112	0.0082	-0.0074	0.009	-0.0024	0.0085	-0.02574		-0.1518	0.0998	0.572	0.1616	-0.65	0.0749	-0.3989	0.067	-0.6971	0.0727	-0.26516
	ILE-326	0.6664	0.1082	-0.8597	0.1449	0.1799	0.0173	0.1444	0.0157	0.0122	0.0188	0.02864		-0.5247	0.0683	0.2025	0.1466	-0.0361	0.0303	0.0166	0.0271	0.1331	0.0339	-0.04172		-0.0939	0.0195	-0.1066	0.0182	0.0266	0.0137	0.0308	0.0147	-0.0606	0.017	-0.04074		0.044	0.0999	-0.7635	0.0882	0.1696	0.0366	0.1921	0.0325	0.0848	0.0419	-0.0546
	ALA-327	-0.4301	0.1064	-0.4203	0.0675	-0.4352	0.0178	-0.108	0.0198	-0.2383	0.0163	-0.32638		0.3332	0.0825	0.226	0.0566	0.0022	0.0201	0.0288	0.0273	0.1763	0.0286	0.1533		-0.0487	0.0105	-0.0314	0.0129	-0.0002	0.015	0.016	0.0107	-0.0106	0.014	-0.01498		-0.1446	0.0696	-0.2295	0.0711	-0.4333	0.0284	-0.0617	0.0355	-0.071	0.0359	-0.18802
	ASP-328	-55.5875	0.7497	-66.9265	0.9882	-30.587	0.201	-28.4954	0.1647	-30.9558	0.2646	-42.5104		1.6838	0.2746	5.0069	0.7638	0.9931	0.1466	1.212	0.1465	1.6843	0.1695	2.11602		-0.0075	0.0075	-0.0402	0.013	-0.0056	0.0083	0.003	0.008	-0.0056	0.0083	-0.01118		-53.8953	0.679	-61.8717	0.6113	-29.5919	0.2426	-27.2721	0.2074	-29.2747	0.2857	-40.3811
	GLU-329	-121.174	1.8433	-116.216	1.3987	-60.3426	0.5623	-52.0147	0.4914	-58.4119	0.5422	-81.6318		8.0666	1.3166	4.1495	0.658	2.3918	0.2542	2.3042	0.2479	3.1132	0.2327	4.00506		-0.0552	0.0166	-0.0401	0.0107	0.0065	0.0147	-0.0135	0.0116	-0.0138	0.0086	-0.02322		-113.204	1.3458	-112.116	1.2643	-57.9357	0.6017	-49.7291	0.5565	-55.2904	0.577	-77.655

## Sheet: TPR2
Protein	#Residues	MM_Energy(+/-)dev/error												Polar_Energy(+/-)dev/error												Apolar_Energy(+/-)dev/error												Total_Energy(+/-)dev/error
		Frame1		Frame2		Frame3		Frame4		Frame5		Med		Frame1		Frame2		Frame3		Frame4		Frame5		Med		Frame1		Frame2		Frame3		Frame4		Frame5		Med		Frame1		Frame2		Frame3		Frame4		Frame5		Med
InvF	MET-1	-30.1335	0.0705	-29.4792	0.0607	-30.8145	0.0729	-29.9691	0.0585	-30.4196	0.0722	-30.1632		-0.2988	0.1012	-0.1285	0.0969	-0.3131	0.0966	-0.3469	0.0944	-0.2344	0.0889	-0.26434		0.0234	0.0098	-0.0116	0.0107	-0.0089	0.0082	-0.0187	0.009	0.0105	0.0069	-0.00106		-30.412	0.1143	-29.6242	0.1115	-31.1337	0.1118	-30.3352	0.1061	-30.6444	0.1064	-25.3583
	LEU-2	0.0503	0.0055	0.0697	0.0044	0.0344	0.0056	0.0589	0.006	0.0546	0.0043	0.05358		0.0075	0.004	0.004	0.004	0.0062	0.0032	0.0023	0.004	0.0012	0.0049	0.00424		0.0019	0.0061	0.0001	0.003	0.0053	0.0034	0.003	0.0028	0.0003	0.0031	0.00212		0.0595	0.0089	0.0739	0.0066	0.0462	0.0074	0.0641	0.007	0.0562	0.0075	0.0499833
	ASN-3	0.3571	0.0199	0.1808	0.0187	0.2634	0.0229	0.1834	0.019	0.2027	0.0237	0.23748		-0.2537	0.0493	-0.2378	0.0593	-0.3377	0.0534	-0.358	0.0462	-0.2804	0.0445	-0.29352		0.0071	0.0042	0.0003	0.0034	-0.0073	0.0041	0.0031	0.0039	-0.0024	0.0055	0.00016		0.1088	0.0553	-0.0557	0.0635	-0.0859	0.061	-0.1707	0.0537	-0.0818	0.0522	-0.04755
	THR-4	0.078	0.007	0.1186	0.006	0.0613	0.0073	0.1094	0.0069	0.1092	0.0086	0.0953		-0.0337	0.0225	-0.0085	0.0235	-0.0572	0.0221	-0.108	0.0253	-0.072	0.016	-0.05588		-0.0074	0.0043	0.0011	0.0038	-0.0063	0.0046	0.0059	0.0046	0.0061	0.0029	-0.00012		0.0356	0.0243	0.1121	0.0254	-0.0011	0.0237	0.0074	0.0259	0.0435	0.0176	0.0329167
	GLN-5	0.0932	0.0102	0.0737	0.0104	0.0885	0.0107	0.1026	0.0111	0.1566	0.0291	0.10292		-0.0458	0.023	-0.0228	0.0212	-0.063	0.0195	-0.0904	0.0179	-0.0778	0.0202	-0.05996		-0.0023	0.0023	0.0005	0.0016	0.0004	0.002	-0.0008	0.0028	0.0025	0.0025	6e-05		0.0459	0.0258	0.0518	0.0233	0.0255	0.023	0.0113	0.0205	0.0813	0.0324	0.0359667
	GLU-6	28.2824	0.057	27.8117	0.0542	28.7242	0.0671	28.7829	0.0797	29.0964	0.0815	28.5395		-0.5926	0.1099	-0.2908	0.1048	-0.711	0.0892	-0.7363	0.0896	-0.6155	0.0906	-0.58924		0.0049	0.0082	-0.0094	0.0059	0.0254	0.0068	0.0125	0.0058	-0.0253	0.0087	0.00162		27.6988	0.1241	27.5104	0.113	28.0393	0.1221	28.0649	0.1187	28.4488	0.1186	23.2937
	VAL-7	0.0008	0.0069	-0.0001	0.0063	0.0557	0.008	0.019	0.0078	0.0153	0.0087	0.01814		-0.0901	0.021	-0.0725	0.022	-0.1063	0.0177	-0.1189	0.0157	-0.0735	0.0184	-0.09226		0.0032	0.0058	-0.0065	0.0055	-0.0131	0.0067	-0.0103	0.0067	0.0011	0.006	-0.00512		-0.0865	0.0237	-0.0793	0.0257	-0.0631	0.0203	-0.1114	0.0186	-0.0567	0.0224	-0.0661667
	LEU-8	-0.0196	0.0075	0.0098	0.0059	-0.0165	0.0069	-0.0233	0.0062	-0.0421	0.0087	-0.01834		-0.0124	0.0072	0.0006	0.0062	-0.0317	0.0062	-0.0167	0.0063	-0.0113	0.0046	-0.0143		-0.0067	0.0097	-0.0139	0.0103	0.0003	0.0099	-0.0035	0.0089	-0.0015	0.0085	-0.00506		-0.039	0.0138	-0.0034	0.0142	-0.0478	0.0133	-0.043	0.0114	-0.0552	0.0132	-0.0314
	LYS-9	-25.1207	0.0483	-24.8343	0.04	-25.4174	0.052	-25.1891	0.0473	-25.2088	0.0524	-25.1541		-0.6145	0.0937	-0.5453	0.0897	-0.5191	0.0992	-0.5249	0.0924	-0.8282	0.1142	-0.6064		-0.0184	0.0073	-0.0077	0.0053	-0.0136	0.0061	-0.0073	0.0059	0.0071	0.0065	-0.00798		-25.7491	0.1029	-25.3822	0.0966	-25.9442	0.1077	-25.723	0.101	-26.0314	0.1142	-21.4717
	GLU-10	26.9032	0.046	26.6579	0.0382	27.0785	0.0493	26.7908	0.0456	26.8538	0.0488	26.8568		-0.103	0.1028	-0.2336	0.1008	-0.4855	0.0921	-0.3803	0.0908	-0.4142	0.0737	-0.32332		-0.0033	0.0055	-0.0067	0.0046	0.0028	0.004	0.0113	0.0046	0.0032	0.0034	0.00146		26.7972	0.1092	26.4216	0.1033	26.5972	0.1002	26.4171	0.1008	26.4465	0.0845	22.1133
	GLY-11	0.2613	0.006	0.2843	0.006	-0.0243	0.0074	-0.0599	0.0065	0.2331	0.0066	0.1389		-0.0324	0.0198	0.0153	0.0179	-0.0525	0.0135	-0.0405	0.0117	-0.0706	0.0172	-0.03614		-0.0077	0.0033	0.0038	0.0032	-0.0107	0.0045	-0.0173	0.0059	0.0043	0.0031	-0.00552		0.2201	0.0223	0.3033	0.0185	-0.0872	0.0153	-0.1175	0.0132	0.1664	0.0184	0.08085
	GLU-12	30.8266	0.1036	29.3637	0.1195	29.0993	0.0675	28.9492	0.078	29.6288	0.114	29.5735		-0.4076	0.1178	-0.2723	0.1098	-0.429	0.1021	-0.6928	0.0968	-0.4552	0.1029	-0.45138		0.0018	0.0046	0.0037	0.0032	0.0014	0.0058	0.0027	0.0053	0.0012	0.0047	0.00216		30.4098	0.1573	29.0959	0.1698	28.6776	0.117	28.2606	0.1299	29.1813	0.1605	24.2709
	LYS-13	-38.0162	0.0858	-38.2709	0.0737	-38.1979	0.0752	-38.5454	0.0761	-37.687	0.0755	-38.1435		-0.0557	0.0781	-0.0405	0.0809	-0.2473	0.0788	-0.1937	0.0742	-0.0612	0.0813	-0.11968		-0.0006	0.009	0.0126	0.0103	-0.0065	0.0077	-0.0088	0.0088	-0.0061	0.0096	-0.00188		-38.0749	0.117	-38.3037	0.1079	-38.4554	0.1067	-38.7508	0.1084	-37.7535	0.1101	-31.8897
	ARG-14	-29.1648	0.0488	-29.0313	0.045	-29.4458	0.0531	-29.1599	0.0484	-29.3705	0.0502	-29.2345		-0.1433	0.0396	0.0243	0.0388	-0.1615	0.039	-0.1805	0.0384	-0.0773	0.0397	-0.10766		0.0012	0.0062	0.0081	0.0066	0.0056	0.005	0.0089	0.0061	-0.0073	0.005	0.0033		-29.3073	0.0616	-28.9982	0.0561	-29.601	0.0622	-29.3293	0.0627	-29.4569	0.0614	-24.4488
	LYS-15	-34.1589	0.1228	-33.4483	0.114	-33.0002	0.0749	-32.7647	0.0938	-33.0842	0.1093	-33.2913		-0.713	0.1209	-0.4546	0.117	-0.7585	0.1159	-0.707	0.1166	-0.5631	0.1104	-0.63924		0.0043	0.0028	-0.0007	0.003	-0.0007	0.0046	0.0015	0.0056	-0.0032	0.0084	0.00024		-34.8674	0.1671	-33.9024	0.1688	-33.756	0.1475	-33.4689	0.1448	-33.6435	0.1582	-28.273
	ILE-16	0.3904	0.0058	0.3823	0.0057	0.4772	0.0056	0.4413	0.0055	0.472	0.0051	0.43264		-0.0263	0.0101	0.0037	0.0083	-0.0177	0.0063	0.004	0.0055	-0.0184	0.006	-0.01094		-0.0131	0.0068	-0.0158	0.0094	0.0122	0.0075	0.0064	0.0073	0.0054	0.0057	-0.00098		0.3507	0.0139	0.37	0.0131	0.4719	0.0112	0.4514	0.0101	0.4591	0.01	0.350517
	ARG-17	-30.9441	0.0665	-30.7475	0.0651	-35.186	0.1681	-36.8102	0.1299	-35.9565	0.1288	-33.9289		-0.4461	0.0758	-0.1337	0.0687	-0.4752	0.0516	-0.4051	0.0533	-0.3119	0.0495	-0.3544		0.0005	0.0022	0.0052	0.0067	-0.0012	0.0043	0.0006	0.0039	-0.004	0.004	0.00022		-31.3947	0.1035	-30.8782	0.0955	-35.6704	0.1737	-37.2138	0.1378	-36.2751	0.1415	-28.572
	SER-18	0.0975	0.0386	0.1377	0.0128	0.1205	0.0254	0.2167	0.0226	0.1189	0.0254	0.13826		0.0251	0.0119	0.019	0.0147	0.0276	0.0097	-0.0145	0.0086	-0.0032	0.0095	0.0108		-0.0121	0.0037	0.0011	0.0013	0.0082	0.0048	0.0119	0.0039	0.0067	0.0039	0.00316		0.1108	0.0431	0.1576	0.0186	0.1548	0.0281	0.2134	0.025	0.1221	0.0291	0.12645
	PRO-19	0.5271	0.0241	-0.401	0.0083	0.6826	0.0104	0.5769	0.0139	0.6824	0.0106	0.4136		-0.0013	0.0046	-0.0365	0.0095	-0.0026	0.0033	0.0145	0.0024	-0.0093	0.004	-0.00704		-0.0024	0.0036	0.0084	0.0047	-0.0047	0.0035	-0.0008	0.0046	0.0002	0.003	0.00014		0.5233	0.0253	-0.4295	0.0128	0.6753	0.011	0.5913	0.0145	0.6737	0.0117	0.339017
	GLU-20	45.3846	0.1684	43.6594	0.1274	43.8737	0.1182	43.3561	0.1395	42.3036	0.1274	43.7155		-0.7823	0.079	0.2833	0.0628	-0.7952	0.0596	-0.5117	0.0583	-0.7458	0.0626	-0.51034		0.0065	0.0088	-0.0008	0.0101	-0.03	0.0131	-0.0327	0.0188	-0.0218	0.0112	-0.01576		44.6122	0.1649	43.9473	0.1282	43.0511	0.1203	42.81	0.1381	41.5502	0.1271	35.9951
	ALA-21	-0.3853	0.0043	-0.3521	0.0045	-0.4241	0.0044	-0.378	0.004	-0.4375	0.004	-0.3954		0.0099	0.0018	0.0108	0.0022	0.026	0.0015	0.0069	0.0011	0.0259	0.0016	0.0159		-0.0193	0.0054	-0.0067	0.0033	0.0027	0.0029	0.0132	0.004	-0.0019	0.0039	-0.0024		-0.3947	0.007	-0.348	0.0056	-0.3956	0.0051	-0.3582	0.0058	-0.4135	0.0053	-0.318333
	TRP-22	-0.7542	0.0147	-0.5459	0.0176	-0.7724	0.0163	-0.7649	0.016	-0.6621	0.0157	-0.6999		-0.0634	0.0075	-0.0614	0.006	-0.0535	0.0071	-0.0371	0.0049	-0.0814	0.0097	-0.05936		0.0066	0.0046	0.0005	0.0074	-0.0075	0.0052	0.0032	0.0047	0.0022	0.0053	0.001		-0.8104	0.0157	-0.607	0.0206	-0.8324	0.018	-0.7989	0.0177	-0.7414	0.0181	-0.631683
	PHE-23	-0.253	0.0062	-0.2438	0.0074	-0.2834	0.0067	-0.2603	0.0078	-0.2695	0.0072	-0.262		0.0146	0.0019	0.0116	0.0018	0.0239	0.0013	0.0052	0.0026	0.0238	0.0015	0.01582		0.0037	0.0031	-0.0051	0.0029	-0.0042	0.003	-0.0022	0.0032	0.0006	0.0019	-0.00144		-0.2346	0.0068	-0.2374	0.0078	-0.2634	0.0071	-0.2573	0.009	-0.245	0.0072	-0.206283
	ILE-24	0.1111	0.006	0.1256	0.006	0.1189	0.0058	0.0829	0.0056	0.153	0.0058	0.1183		-0.0025	0.0037	-0.0028	0.003	0.0013	0.0034	0.0141	0.0042	-0.0086	0.0016	0.0003		-0.0005	0.0083	-0.0003	0.0057	0.0314	0.0087	0.0175	0.006	0.0038	0.0054	0.01038		0.1079	0.0107	0.1223	0.0092	0.1518	0.011	0.1147	0.0097	0.1484	0.0075	0.107517
	GLN-25	-0.3435	0.0138	-0.2509	0.0141	-0.3967	0.0135	-0.3327	0.0145	-0.3957	0.0233	-0.3439		-0.0693	0.0189	-0.0529	0.0225	-0.0887	0.0221	-0.0573	0.0181	-0.0643	0.0225	-0.0665		0.0136	0.0077	-0.007	0.0082	-0.03	0.0087	-0.0304	0.0078	-0.0068	0.0064	-0.01212		-0.3984	0.0261	-0.3117	0.0274	-0.5152	0.0256	-0.4207	0.024	-0.4683	0.0311	-0.352383
	THR-26	-0.3275	0.0151	-0.175	0.0184	-0.3206	0.0068	-0.2805	0.0073	-0.581	0.0108	-0.33692		-0.0662	0.0266	0.0004	0.0194	-0.0406	0.0109	-0.0424	0.0103	-0.0202	0.0132	-0.0338		-0.0061	0.008	-0.0029	0.009	0.001	0.0073	-0.0036	0.0055	-0.0124	0.0055	-0.0048		-0.3998	0.0312	-0.1767	0.029	-0.3609	0.0146	-0.3262	0.0133	-0.613	0.0185	-0.312767
	CYS-27	-0.2157	0.0101	-0.1271	0.0109	-0.0643	0.0099	-0.0884	0.0079	-0.0461	0.0118	-0.10832		-0.06	0.0184	-0.0641	0.0191	-0.1537	0.0192	-0.1013	0.0186	-0.1013	0.0197	-0.09608		-0.0002	0.0032	-0.0047	0.0024	-0.0023	0.0028	0.0013	0.0016	0.0008	0.0027	-0.00102		-0.2765	0.0195	-0.1956	0.023	-0.2209	0.0224	-0.1875	0.0194	-0.1464	0.0228	-0.17115
	SER-28	-0.2868	0.0131	0.1615	0.0136	0.275	0.0134	0.2901	0.011	0.2153	0.0161	0.13102		-0.1102	0.0412	-0.0904	0.0389	-0.158	0.0344	-0.1425	0.0368	-0.1628	0.0373	-0.13278		0.0005	0.0026	-0.0041	0.0037	-0.003	0.0037	-0.0031	0.0025	0.0097	0.0052	0		-0.3958	0.0418	0.0696	0.0414	0.1128	0.04	0.1437	0.0379	0.0642	0.0406	-0.000916667
	ALA-29	-0.0085	0.0122	-0.1866	0.0057	-0.2028	0.0052	-0.2	0.0049	0.0849	0.0144	-0.1026		-0.0224	0.0182	0.0064	0.0248	-0.0922	0.0219	-0.0223	0.0245	-0.0975	0.0194	-0.0456		-0.0149	0.0099	-0.0168	0.0075	0.0212	0.0105	0.0143	0.0101	0.0096	0.0074	0.00268		-0.0469	0.0248	-0.1982	0.0262	-0.2727	0.0243	-0.208	0.0281	-0.002	0.0263	-0.1213
	GLN-30	0.8706	0.016	0.4327	0.018	0.1801	0.0126	0.1514	0.0122	0.6691	0.0343	0.46078		-0.2438	0.0464	-0.2233	0.0476	-0.0944	0.0155	-0.1197	0.016	-0.2635	0.0458	-0.18894		0.003	0.0032	-0.0059	0.0046	-0.0078	0.0087	-0.0034	0.0085	0.0003	0.0051	-0.00276		0.6316	0.0488	0.2021	0.0527	0.0778	0.0204	0.0281	0.0216	0.4038	0.0546	0.2239
	LYS-31	-33.5363	0.1331	-34.4	0.1057	-34.5807	0.1338	-34.4645	0.1356	-33.6734	0.1104	-34.131		-0.4842	0.1166	-0.439	0.1191	-0.8296	0.1013	-0.5695	0.1067	-0.2792	0.1096	-0.5203		0.0129	0.0132	0.0219	0.0131	0.0103	0.0155	0.0289	0.0138	-0.0448	0.0154	0.00584		-34.0003	0.1732	-34.8132	0.163	-35.4018	0.1746	-35.0079	0.1764	-34.0006	0.1538	-28.8706
	LEU-32	0.3828	0.0115	0.4469	0.0099	0.4555	0.0139	0.4643	0.0098	0.522	0.0098	0.4543		0.0131	0.0054	0.0064	0.0025	-0.0162	0.0063	-0.0014	0.0027	-0.0095	0.0026	-0.00152		-0.0043	0.0129	-0.0078	0.0085	0.0012	0.0087	-0.0136	0.0096	-0.0209	0.0094	-0.00908		0.3927	0.0171	0.4455	0.0129	0.441	0.0174	0.4493	0.0142	0.4912	0.0146	0.36995
	HIS-33	-0.4655	0.0154	-0.3825	0.0167	-0.5475	0.0184	-0.3471	0.0253	-0.28	0.0156	-0.40452		-0.0729	0.022	-0.0145	0.0129	-0.0494	0.0123	-0.1419	0.0247	-0.0128	0.021	-0.0583		-0.0066	0.0061	0.0053	0.0046	0.0068	0.0039	0.0146	0.0041	0.0101	0.0067	0.00604		-0.5466	0.0261	-0.3905	0.0238	-0.589	0.0232	-0.474	0.0386	-0.2827	0.0281	-0.380467
	MET-34	1.1488	0.0546	1.6459	0.041	0.9092	0.0302	1.5285	0.0376	1.0398	0.0534	1.25444		-0.1218	0.0197	-0.1386	0.0201	-0.2322	0.0133	-0.1459	0.0158	-0.1457	0.0145	-0.15684		0.0067	0.0064	-0.0065	0.0052	-0.0153	0.0066	-0.0188	0.0084	-0.0052	0.0056	-0.00782		1.0328	0.0544	1.5029	0.0465	0.6631	0.0316	1.3638	0.0407	0.8877	0.0539	0.908383
	SER-35	0.2186	0.0141	0.3276	0.0138	0.3307	0.0155	0.2617	0.0152	0.4541	0.0151	0.31854		-0.1055	0.0145	-0.0643	0.0139	-0.1093	0.0153	-0.1078	0.0132	-0.059	0.0116	-0.08918		-0.0005	0.0009	-0.0022	0.002	-0.008	0.003	0.0014	0.0016	0.0019	0.0025	-0.00148		0.1129	0.0227	0.2608	0.0206	0.2131	0.021	0.1559	0.0213	0.3978	0.0172	0.190083
	PHE-36	-0.8044	0.0101	-0.6938	0.0091	-0.7498	0.0086	-0.6335	0.0073	-0.8404	0.0076	-0.74438		0.0131	0.0035	0.0017	0.0038	0.008	0.0036	-0.0127	0.0038	0.023	0.0038	0.00662		-0.0116	0.007	-0.0114	0.0067	-0.0051	0.0059	0.0055	0.0052	0.0062	0.004	-0.00328		-0.8035	0.0122	-0.7039	0.0122	-0.7479	0.012	-0.6403	0.0101	-0.8117	0.0097	-0.617883
	SER-37	-0.7633	0.0134	-0.6689	0.0143	-0.8136	0.0136	-0.8054	0.0134	-0.768	0.0181	-0.76384		-0.1649	0.0421	-0.0864	0.0435	-0.3278	0.0353	-0.236	0.0326	-0.1487	0.0323	-0.19276		0.0021	0.0033	-0.0042	0.004	-0.0053	0.0033	0.0015	0.0035	0.0006	0.0032	-0.00106		-0.9291	0.0416	-0.7613	0.0484	-1.1466	0.0364	-1.0412	0.0356	-0.9154	0.0371	-0.798933
	GLU-38	40.9749	0.0847	41.2384	0.0905	41.1555	0.0794	41.5408	0.0804	40.4607	0.0742	41.0741		-0.2791	0.0887	-0.0888	0.0814	-0.1491	0.0791	-0.0796	0.0847	-0.0389	0.0722	-0.1271		-0.001	0.005	0.0089	0.0049	0.0019	0.0042	0.0007	0.0045	-0.0033	0.0045	0.00144		40.6976	0.1314	41.155	0.1307	41.0106	0.1131	41.4601	0.1173	40.4173	0.0987	34.1234
	SER-39	-0.4299	0.0141	-0.399	0.0134	-0.2429	0.0138	-0.3074	0.0134	-0.2676	0.0143	-0.32936		-0.187	0.0373	-0.1325	0.0354	-0.2019	0.0341	-0.1929	0.0329	-0.1432	0.0342	-0.1715		0.0009	0.0012	0.0001	0.0012	0.0004	0.0004	0	0	0.0008	0.0005	0.00044		-0.6175	0.0386	-0.5324	0.0356	-0.4435	0.0382	-0.5011	0.0363	-0.4101	0.0366	-0.417433
	ARG-40	-33.4691	0.0702	-34.9564	0.0733	-35.8609	0.0716	-34.4961	0.0886	-33.378	0.074	-34.4321		-0.1668	0.0566	-0.099	0.0517	0.0018	0.0429	-0.4232	0.0542	-0.1605	0.0507	-0.16954		-0.0006	0.0052	0.0344	0.0094	0.0041	0.0071	0.0148	0.0042	-0.004	0.005	0.00974		-33.6352	0.0881	-35.0185	0.0906	-35.8533	0.0875	-34.9078	0.1096	-33.542	0.0952	-28.8261
	HIS-41	0.1238	0.0302	0.1069	0.0353	0.9729	0.0606	0.0513	0.0306	-0.011	0.0267	0.24878		-0.3111	0.065	-0.2807	0.075	-0.3919	0.05	-0.5436	0.0517	-0.4019	0.054	-0.38584		-0.0015	0.0016	-0.0006	0.0017	-0.0045	0.0019	-0.0095	0.0025	0.0003	0.0022	-0.00316		-0.1869	0.0729	-0.1761	0.0815	0.5753	0.0838	-0.5004	0.0624	-0.4176	0.0575	-0.117617
	ASN-42	0.3533	0.0324	0.5074	0.027	0.8386	0.0282	0.6815	0.0314	0.7476	0.0236	0.62568		-0.2944	0.0479	-0.2094	0.0439	-0.4632	0.0396	-0.3289	0.0365	-0.3475	0.0311	-0.32868		-0.0162	0.0054	0.0012	0.0056	-0.0111	0.0042	-0.0115	0.0063	0.0045	0.0054	-0.00662		0.0417	0.0588	0.2999	0.0513	0.3636	0.0547	0.3418	0.0497	0.4061	0.0418	0.242183
	GLU-43	53.1661	0.1206	54.8452	0.1019	52.7302	0.106	53.9752	0.1134	54.0404	0.1081	53.7514		-0.0927	0.089	0.1447	0.096	-0.2387	0.0904	-0.0531	0.0933	0.0467	0.0875	-0.03862		-0.0194	0.0066	-0.011	0.0063	-0.0164	0.0055	-0.0389	0.0091	0.0048	0.0067	-0.01618		53.0557	0.1517	54.9745	0.1325	52.4844	0.1374	53.8795	0.1433	54.092	0.1323	44.7477
	ASN-44	-1.7615	0.0501	-1.1215	0.0786	-1.3915	0.0393	-1.5177	0.0894	-0.4754	0.1101	-1.25352		-0.3139	0.0516	-0.1696	0.0544	-0.3025	0.0516	-0.2853	0.0486	-0.2263	0.0495	-0.25952		-0.0006	0.0037	0.0001	0.0044	-0.0007	0.0027	-0.0003	0.0026	-0.0001	0.0044	-0.00032		-2.0769	0.075	-1.2938	0.0951	-1.6918	0.0688	-1.8014	0.0999	-0.7001	0.1151	-1.26067
	CYS-45	-0.1257	0.0232	-0.1394	0.025	-0.3483	0.0262	-0.2261	0.0226	-0.1467	0.0249	-0.19724		-0.0571	0.0203	-0.0004	0.0156	-0.0654	0.0211	0.009	0.0223	-0.004	0.0195	-0.02358		0.0195	0.0105	0.0251	0.0115	0.0201	0.0159	0.0228	0.012	-0.035	0.0153	0.0105		-0.1623	0.0325	-0.1145	0.0301	-0.3944	0.0338	-0.1936	0.0324	-0.1852	0.0366	-0.175
	LEU-46	-0.4155	0.0102	-0.4347	0.0081	-0.3687	0.0095	-0.3248	0.0095	-0.4519	0.0084	-0.39912		-0.001	0.0056	0.003	0.0037	0.0049	0.0062	0.0066	0.0055	0.008	0.0037	0.0043		0.0173	0.01	0.0069	0.0084	-0.0068	0.0122	-0.0088	0.0083	-0.0331	0.0134	-0.0049		-0.3982	0.0163	-0.4244	0.012	-0.3705	0.0174	-0.3264	0.014	-0.4778	0.0162	-0.332883
	ILE-47	-0.679	0.0139	-0.7124	0.0095	-0.6394	0.0085	-0.6014	0.0094	-0.7162	0.0078	-0.66968		-0.0508	0.0164	-0.0303	0.0162	0.0127	0.0083	-0.0021	0.0091	0.0037	0.0098	-0.01336		-0.0083	0.0077	0.0019	0.0062	0.0035	0.0087	0.0174	0.0074	0.0165	0.0091	0.0062		-0.7392	0.0255	-0.7401	0.0214	-0.6231	0.0153	-0.5861	0.0163	-0.6959	0.015	-0.564067
	GLN-48	-0.8575	0.0379	-0.6609	0.0443	-0.5268	0.0362	-0.7447	0.0295	-0.3502	0.0443	-0.62802		-0.2662	0.0585	-0.2436	0.0591	-0.4022	0.0446	-0.2753	0.0561	-0.342	0.0536	-0.30586		0.0106	0.0097	-0.0193	0.0104	0.0037	0.0135	-0.0362	0.0118	-0.0154	0.0074	-0.01132		-1.1166	0.0631	-0.9237	0.0748	-0.9259	0.0555	-1.0583	0.0646	-0.7068	0.0686	-0.78855
	GLU-49	39.6748	0.1175	39.766	0.0919	40.4823	0.1034	39.1456	0.0927	39.8865	0.099	39.791		-0.3548	0.079	-0.1808	0.0841	-0.3968	0.0707	-0.2776	0.0654	-0.435	0.0751	-0.329		0.0164	0.0083	-0.0157	0.0057	-0.0137	0.007	-0.0001	0.0068	-0.007	0.0054	-0.00402		39.3376	0.1377	39.5695	0.1263	40.0764	0.1199	38.8652	0.1073	39.4461	0.1217	32.8825
	GLY-50	0.5244	0.0116	0.5778	0.0115	0.7082	0.0114	0.5623	0.011	0.4879	0.0108	0.57212		-0.0314	0.0067	-0.0232	0.0061	-0.0428	0.0078	-0.0262	0.0066	-0.0208	0.0053	-0.02888		0.0247	0.0085	0.007	0.0093	0.0002	0.0075	-0.0179	0.008	-0.0035	0.0049	0.0021		0.5176	0.0164	0.5612	0.0155	0.6653	0.0143	0.5186	0.0147	0.4637	0.0134	0.4544
	ALA-51	-0.2973	0.0096	-0.3652	0.0085	-0.3814	0.0086	-0.3284	0.0081	-0.3841	0.0094	-0.35128		0.0304	0.0035	0.0249	0.003	0.0372	0.0031	0.0079	0.003	0.0452	0.0025	0.02912		0.0153	0.0034	0.002	0.0038	0.0071	0.0042	0.0056	0.0038	-0.0024	0.0026	0.00552		-0.2517	0.0114	-0.3389	0.0097	-0.3368	0.0097	-0.3149	0.0093	-0.3416	0.0093	-0.263983
	LEU-52	0.8892	0.0119	0.8802	0.0104	0.9852	0.0098	0.8695	0.0115	0.9487	0.0119	0.91456		-0.04	0.0044	-0.0571	0.004	-0.0939	0.0044	-0.0214	0.0049	-0.102	0.0046	-0.06288		-0.0284	0.0103	0.0175	0.0111	0.0302	0.0104	0.0135	0.0096	0.0044	0.0087	0.00744		0.8212	0.016	0.8404	0.0137	0.9215	0.0144	0.8606	0.0146	0.8501	0.0134	0.715633
	LEU-53	-0.5007	0.0088	-0.5312	0.0079	-0.4877	0.0078	-0.4396	0.0078	-0.5286	0.0067	-0.49756		0.0244	0.0037	0.0362	0.0027	0.0444	0.002	0.0189	0.0024	0.0559	0.0024	0.03596		0.0042	0.0053	-0.0025	0.0056	-0.0018	0.0046	0.0034	0.0048	-0.0004	0.0043	0.00058		-0.4717	0.0114	-0.4969	0.0102	-0.4444	0.0098	-0.4167	0.0096	-0.4731	0.0081	-0.3838
	PHE-54	1.2301	0.0353	1.4824	0.0256	1.4625	0.0305	1.5558	0.0214	1.4062	0.0415	1.4274		0.0024	0.0124	0.025	0.0135	0.004	0.0096	-0.0048	0.0132	0.0123	0.0128	0.00778		-0.0216	0.0172	-0.016	0.0158	-0.0156	0.0134	0.0036	0.0119	-0.0285	0.0126	-0.01562		1.2126	0.0422	1.4929	0.0332	1.4515	0.0333	1.5551	0.0251	1.3914	0.0431	1.18392
	CYS-55	0.2027	0.0662	-0.3358	0.0495	-0.3838	0.0552	-0.4756	0.0471	-0.1282	0.0622	-0.22414		-0.0403	0.0118	-0.0398	0.0096	-0.0926	0.0083	-0.0628	0.0083	-0.0268	0.0103	-0.05246		-0.0132	0.0057	0.0063	0.0065	0.0003	0.0081	0.0107	0.0082	-0.0044	0.007	-6e-05		0.1499	0.0669	-0.3693	0.0514	-0.4768	0.0563	-0.5237	0.0501	-0.1563	0.0623	-0.229367
	GLU-56	52.2588	0.2214	46.7647	0.1064	54.1719	0.2519	51.9194	0.2184	52.8603	0.2346	51.595		-0.2812	0.1133	-0.3293	0.1011	-0.9828	0.0891	-0.5743	0.0924	-0.5978	0.0933	-0.55308		-0.0082	0.0045	-0.0022	0.0047	0.0044	0.0056	0.0037	0.0052	0.0095	0.0046	0.00144		51.9795	0.2501	46.4378	0.1485	53.1834	0.2582	51.3417	0.23	52.2641	0.2368	42.5344
	GLN-57	-0.0837	0.0346	0.1439	0.0251	-0.091	0.0213	-0.2055	0.0216	0.0154	0.0213	-0.04418		-0.1393	0.0546	-0.0209	0.0425	-0.1631	0.0479	-0.2812	0.0542	-0.1876	0.0497	-0.15842		-0.0028	0.0038	0.0021	0.0075	0.0064	0.0043	0.0096	0.005	-0.0006	0.0044	0.00294		-0.2228	0.0651	0.1242	0.0483	-0.2501	0.054	-0.4767	0.0551	-0.1753	0.0554	-0.166783
	ALA-58	-0.3499	0.0068	-0.3052	0.0042	-0.3182	0.0038	-0.3087	0.0052	-0.3269	0.0041	-0.32178		0.0401	0.0129	0.018	0.01	0.0083	0.0102	0.0155	0.0101	0.0104	0.0098	0.01846		-0.0037	0.004	-0.006	0.0057	0.0053	0.0051	0.0039	0.0046	0.0081	0.0031	0.00152		-0.3135	0.0151	-0.2937	0.0116	-0.3041	0.0116	-0.2895	0.0115	-0.3083	0.011	-0.251517
	VAL-59	-0.2196	0.0135	-0.2253	0.0099	-0.296	0.0088	-0.2094	0.0098	-0.3532	0.0101	-0.2607		-0.0375	0.0209	-0.0316	0.0152	-0.0365	0.0093	-0.0349	0.0125	-0.0599	0.0191	-0.04008		0.0043	0.0052	0.0069	0.0065	0.0005	0.0063	-0.0046	0.0081	-0.0202	0.0085	-0.00262		-0.2545	0.0244	-0.2504	0.0174	-0.3312	0.0142	-0.2487	0.018	-0.4336	0.0227	-0.253067
	VAL-60	-0.4109	0.0059	-0.4111	0.0061	-0.4705	0.0061	-0.421	0.0051	-0.4478	0.0055	-0.43226		0.0037	0.0031	0.0004	0.0028	-0.0119	0.0066	-0.0149	0.0057	0.0072	0.0029	-0.0031		-0.0015	0.0073	-0.0166	0.0059	0.0034	0.0072	0.0026	0.0068	0.0061	0.0066	-0.0012		-0.4087	0.0099	-0.4273	0.0087	-0.479	0.0112	-0.4331	0.0095	-0.4342	0.0092	-0.363717
	ALA-61	-0.072	0.0059	-0.0369	0.0049	-0.3492	0.0061	-0.3626	0.0067	-0.0415	0.0055	-0.17244		0.0021	0.005	0.0108	0.0058	-0.0055	0.0066	0.0035	0.0067	-0.0013	0.0059	0.00192		0.0043	0.004	0.0091	0.0038	-0.0026	0.0019	0.0009	0.0015	0.0027	0.0031	0.00288		-0.0656	0.0091	-0.017	0.0086	-0.3571	0.0094	-0.3574	0.0093	-0.0403	0.0089	-0.139567
	PRO-62	-0.0597	0.0126	0.0819	0.0096	0.1297	0.0119	0.1858	0.0097	-0.0326	0.0117	0.06102		-0.0274	0.0104	-0.0125	0.008	-0.0246	0.0077	-0.0249	0.0111	0.0002	0.0092	-0.01784		-0.0093	0.0072	0.0094	0.0055	-0.0077	0.0055	0.0031	0.0057	0.0068	0.0061	0.00046		-0.097	0.018	0.0798	0.0139	0.0963	0.0159	0.1643	0.017	-0.0257	0.0159	0.0362833
	VAL-63	-0.2757	0.0089	-0.2294	0.007	-0.344	0.0065	-0.2902	0.006	-0.1961	0.0093	-0.26708		-0.002	0.0113	-0.0131	0.0119	0.0118	0.0141	-0.0071	0.0116	-0.0012	0.0087	-0.00232		0.0144	0.0066	-0.007	0.006	-0.0038	0.0057	0.0077	0.0052	-0.0219	0.009	-0.00212		-0.2635	0.0161	-0.25	0.0147	-0.3371	0.0162	-0.2888	0.0138	-0.2186	0.0161	-0.226333
	SER-64	-0.125	0.0202	-0.2654	0.0137	-0.5201	0.0167	-0.5458	0.0179	0.0346	0.0181	-0.28434		-0.1944	0.0452	-0.2027	0.0428	-0.2569	0.0388	-0.292	0.0406	-0.1881	0.0389	-0.22682		-0.0009	0.0032	-0.0014	0.0041	0.005	0.0057	0.0084	0.0045	0.0072	0.0036	0.00366		-0.3195	0.051	-0.4697	0.045	-0.7722	0.0412	-0.8272	0.044	-0.1461	0.0431	-0.42245
	GLY-65	0.2443	0.0101	0.2417	0.0055	0.2334	0.002	0.2351	0.0032	0.1833	0.01	0.22756		-0.0727	0.0135	-0.0029	0.0069	0.0018	0.0044	-0.0012	0.0047	-0.0657	0.0116	-0.02814		-0.0016	0.0038	0.0018	0.0039	0.0001	0.0015	0.0043	0.0019	0.0013	0.0031	0.00118		0.1699	0.0186	0.2409	0.0091	0.2355	0.0053	0.2381	0.0055	0.1205	0.0172	0.167483
	ASP-66	27.5913	0.0548	27.574	0.0421	28.3628	0.053	28.0186	0.0527	28.1134	0.0548	27.932		-0.4259	0.1055	-0.2029	0.1033	-0.4879	0.0918	-0.515	0.1094	-0.3628	0.0823	-0.3989		-0.0014	0.0051	-0.0009	0.0037	-0.0059	0.003	-0.0048	0.0031	-0.0129	0.0045	-0.00518		27.1683	0.1182	27.3663	0.1165	27.8649	0.1078	27.4999	0.1221	27.738	0.095	22.9396
	LEU-67	-0.1985	0.0072	-0.2335	0.0063	-0.2497	0.007	-0.2238	0.007	-0.1714	0.0083	-0.21538		-0.0012	0.0047	-0.0028	0.0055	-0.0299	0.0084	0.0012	0.0086	-0.0025	0.0037	-0.00704		0.0176	0.012	-0.0065	0.0104	0.0022	0.0094	-0.0045	0.0078	-0.0364	0.0091	-0.00552		-0.1824	0.0154	-0.2427	0.0133	-0.2773	0.0145	-0.227	0.0133	-0.2103	0.0135	-0.18995
	VAL-68	0.341	0.0044	0.3273	0.0045	0.3379	0.0049	0.2979	0.004	0.4018	0.0057	0.34118		-0.0086	0.0018	-0.0033	0.0018	-0.0172	0.0014	-0.0023	0.002	-0.0159	0.0019	-0.00946		-0.001	0.0041	-0.0022	0.0023	-0.0064	0.0025	-0.0005	0.0021	-0.0025	0.0053	-0.00252		0.3312	0.0062	0.3215	0.0056	0.3144	0.0057	0.2952	0.0051	0.3833	0.008	0.274267
	PHE-69	-0.4195	0.0031	-0.4341	0.0036	-0.4127	0.004	-0.41	0.0053	-0.4131	0.0038	-0.41788		0.0331	0.0098	0.0225	0.0088	0.0255	0.0083	0.0216	0.0071	0.0083	0.0061	0.0222		-0.0083	0.0084	-0.0122	0.0067	0.0221	0.0075	0.0197	0.008	0.0145	0.0053	0.00716		-0.3943	0.0132	-0.4232	0.011	-0.3645	0.0121	-0.3687	0.0118	-0.3908	0.009	-0.323583
	ARG-70	-31.3936	0.0638	-30.9748	0.0616	-32.6664	0.0784	-31.8205	0.0843	-32.6856	0.0719	-31.9082		0.2543	0.02	0.1342	0.0168	0.4296	0.0216	0.1661	0.0162	0.4022	0.0169	0.27728		0.002	0.0059	-0.001	0.0041	-0.0239	0.0072	0.0036	0.0066	0.0001	0.0046	-0.00384		-31.1367	0.0605	-30.8439	0.0565	-32.2613	0.0743	-31.6525	0.0799	-32.2828	0.0647	-26.3629
	PRO-71	-0.6005	0.0055	-0.5754	0.0059	-0.6268	0.006	-0.6203	0.0048	-0.6074	0.0062	-0.60608		0.009	0.0123	-0.0168	0.012	0.0019	0.0113	-0.0083	0.0104	0.007	0.0109	-0.00144		0.0073	0.0058	0.0045	0.0051	0.0055	0.005	-0.0207	0.0082	-0.0401	0.0102	-0.0087		-0.5838	0.014	-0.5876	0.0142	-0.6194	0.0127	-0.6494	0.0141	-0.6404	0.0169	-0.513433
	LEU-72	0.2313	0.0154	0.3471	0.012	0.3697	0.0107	0.418	0.0081	0.3244	0.0103	0.3381		-0.0025	0.0079	0.004	0.0079	-0.0126	0.004	-0.0097	0.0027	-0.0118	0.0036	-0.00652		-0.0242	0.0126	0.0094	0.0114	-0.0213	0.0113	0.0084	0.0096	0.0181	0.008	-0.00192		0.2056	0.0202	0.3609	0.0189	0.3353	0.0163	0.4169	0.0118	0.3311	0.0133	0.274967
	LYS-73	-34.7884	0.1541	-35.4354	0.1463	-35.3537	0.1666	-33.6221	0.1728	-33.7026	0.1175	-34.5804		-0.2683	0.1151	-0.3966	0.1004	-0.3679	0.0992	-0.6602	0.1011	-0.3153	0.0963	-0.40166		-0.0081	0.0059	0.0027	0.0041	0.0065	0.0032	-0.002	0.0042	0.0082	0.005	0.00146		-35.0677	0.1953	-35.8374	0.1835	-35.7128	0.1822	-34.2779	0.1894	-34.0038	0.1576	-29.1499
	ILE-74	0.135	0.0136	-0.1228	0.0125	0.2622	0.0143	0.0997	0.0112	0.2915	0.0128	0.13312		0.0033	0.0065	0.0745	0.0043	-0.0053	0.0043	0.0146	0.0069	0.0092	0.0076	0.01926		-0.0009	0.0053	-0.0148	0.0088	-0.004	0.0076	-0.0368	0.0113	-0.0003	0.01	-0.01136		0.1373	0.0156	-0.0623	0.0155	0.2537	0.0157	0.0777	0.0169	0.2997	0.0167	0.117683
	GLU-75	31.6003	0.1654	31.9588	0.097	32.5691	0.1492	32.0024	0.1224	29.4253	0.1348	31.5112		-0.4307	0.1061	-0.2008	0.0888	-0.775	0.092	-0.5617	0.0907	-0.5404	0.1001	-0.50172		-0.0309	0.0159	-0.0312	0.0094	-0.0311	0.0127	-0.003	0.0064	0.0036	0.0042	-0.01852		31.1353	0.1801	31.7254	0.1227	31.7613	0.1673	31.4349	0.1499	28.8892	0.1687	25.8243
	VAL-76	-0.1416	0.0125	-0.2284	0.0109	-0.055	0.0143	0.0085	0.0131	0.0107	0.0136	-0.08116		-0.0543	0.0143	0.0644	0.0092	-0.0396	0.0126	-0.0154	0.0104	-0.044	0.0158	-0.01778		-0.0125	0.0093	0.0273	0.0081	0.0076	0.0061	0.0052	0.0067	-0.01	0.0073	0.00352		-0.2083	0.0194	-0.1365	0.0166	-0.0869	0.0187	-0.0006	0.017	-0.0435	0.0198	-0.0793
	LEU-77	0.4964	0.0135	0.4434	0.0131	0.59	0.0163	0.6007	0.0128	0.591	0.0134	0.5443		-0.0298	0.0041	0.0006	0.0039	-0.0811	0.0049	-0.0135	0.0039	-0.0356	0.0065	-0.03188		-0.0272	0.0115	0.0027	0.0114	-0.0295	0.0111	0.0289	0.0107	0.0367	0.0092	0.00232		0.4398	0.017	0.446	0.0167	0.4798	0.0182	0.6149	0.0169	0.5926	0.0157	0.42885
	SER-78	0.5286	0.0228	0.405	0.0256	0.4265	0.0297	0.3752	0.0244	0.1429	0.0266	0.37564		-0.0408	0.0123	-0.0296	0.0135	-0.1743	0.0179	0.0446	0.0174	0.101	0.0203	-0.01982		-0.0028	0.0062	0.0194	0.0114	0.003	0.0056	0.0068	0.0105	-0.0156	0.0103	0.00216		0.4854	0.0251	0.3947	0.0287	0.2549	0.0289	0.4257	0.0293	0.2298	0.0294	0.298417
	LYS-79	-29.3037	0.1262	-26.2531	0.1037	-30.043	0.1157	-29.2305	0.1362	-29.0292	0.107	-28.7719		-0.2657	0.0986	-0.6386	0.109	-0.4236	0.0968	-0.3722	0.1061	-0.4196	0.1059	-0.42394		-0.0088	0.0073	-0.0046	0.0099	-0.0018	0.0085	0.0035	0.0079	0.0112	0.007	-0.0001		-29.5757	0.1393	-26.8909	0.1368	-30.4679	0.1439	-29.5956	0.1488	-29.4407	0.151	-24.3285
	LEU-80	0.1765	0.0139	0.181	0.0142	0.0907	0.0147	0.2687	0.0115	0.0748	0.0143	0.15834		-0.0262	0.0063	-0.0544	0.0069	-0.0121	0.0061	-0.0209	0.0048	-0.0167	0.0053	-0.02606		0.0266	0.0137	0.0215	0.0119	0.0199	0.0102	-0.023	0.0101	0.0089	0.008	0.01078		0.1777	0.0191	0.1478	0.0192	0.0983	0.0171	0.225	0.0158	0.0676	0.0162	0.1194
	LEU-81	0.708	0.0156	0.7514	0.0149	0.7596	0.0166	0.8553	0.0152	0.5958	0.0175	0.73402		-0.0575	0.0053	-0.0915	0.0051	-0.1068	0.0064	-0.0409	0.0051	-0.1012	0.0074	-0.07958		0.0144	0.0183	-0.0321	0.0154	-0.0691	0.0192	0.0453	0.0133	0.0108	0.0125	-0.00614		0.6645	0.0219	0.6275	0.0196	0.5824	0.0227	0.8592	0.0199	0.5052	0.0211	0.5398
	ALA-82	0.2475	0.0188	0.222	0.0169	0.172	0.0194	0.3458	0.0177	-0.0395	0.0187	0.18956		-0.0178	0.0032	-0.0237	0.0037	0.0244	0.0066	0.0092	0.0033	0.081	0.0055	0.01462		0.0058	0.005	0.0019	0.0061	-0.0106	0.0058	-0.0153	0.0044	0.0031	0.0037	-0.00302		0.2356	0.0181	0.2004	0.0171	0.1853	0.0187	0.3393	0.0164	0.0447	0.0174	0.16755
	PHE-83	0.1521	0.0131	0.2027	0.0131	0.098	0.014	0.2925	0.0113	0.0332	0.0126	0.1557		-0.0114	0.0056	-0.0322	0.006	0.0158	0.0058	-0.0032	0.0047	0.0096	0.0051	-0.00428		-0.0225	0.0126	0.0427	0.0139	0.0336	0.0102	0.003	0.012	0.0285	0.0097	0.01706		0.1173	0.0194	0.2134	0.0201	0.1474	0.0177	0.2918	0.0175	0.071	0.0152	0.14015
	ILE-84	0.2321	0.0195	0.4059	0.0189	0.2586	0.0214	0.3222	0.0188	0.2725	0.021	0.29826		-0.0275	0.0047	-0.1071	0.0046	-0.0296	0.0045	-0.021	0.0038	-0.1053	0.0068	-0.0581		0.0183	0.011	-0.029	0.0106	-0.053	0.0121	0.0145	0.0112	-0.031	0.0115	-0.01604		0.2227	0.0207	0.27	0.0202	0.1765	0.0215	0.3152	0.02	0.1356	0.0221	0.186667
	ASP-85	46.3241	0.3559	40.5217	0.3441	48.3718	0.3112	49.8679	0.3749	40.6225	0.326	45.1416		-0.3812	0.1132	1.7848	0.1284	-0.3696	0.1256	-0.4003	0.12	2.0614	0.2141	0.53902		0.0072	0.0039	-0.0037	0.003	-0.0006	0.0031	-0.0012	0.0025	-0.0057	0.0034	-0.0008		45.9696	0.3402	42.2958	0.275	47.9939	0.2732	49.4645	0.2945	42.6786	0.2345	38.0671
	GLY-86	-0.1789	0.021	-0.0445	0.0193	-0.2197	0.0214	-0.0484	0.019	-0.2095	0.0235	-0.1402		-0.0148	0.0199	-0.1155	0.0179	-0.0329	0.0154	-0.0657	0.0176	-0.1137	0.0153	-0.06852		-0.0027	0.0031	0.0009	0.0018	-0.0024	0.0023	0.0017	0.0025	0.0019	0.0021	-0.00012		-0.1955	0.027	-0.16	0.0265	-0.2549	0.0256	-0.1127	0.0265	-0.3221	0.0276	-0.1742
	ALA-87	-0.1879	0.0149	-0.1416	0.0127	-0.2688	0.0148	-0.2114	0.0148	-0.2173	0.0197	-0.2054		0.0266	0.0165	-0.0493	0.0147	0.0156	0.013	-0.0364	0.0137	0.0124	0.0159	-0.00622		-0.0186	0.0075	0.0154	0.0097	0.0196	0.0086	0.0318	0.0108	0.0143	0.008	0.0125		-0.1798	0.0227	-0.1737	0.0202	-0.2333	0.0198	-0.2154	0.0231	-0.1907	0.025	-0.165483
	GLY-88	0.2848	0.0317	1.552	0.0209	0.6081	0.0426	1.1186	0.0306	0.7205	0.0359	0.8568		-0.08	0.0112	-0.2172	0.0147	-0.1426	0.0116	-0.1231	0.0102	-0.1682	0.0134	-0.14622		0.0025	0.0037	0.0005	0.0038	-0.0006	0.0046	-0.0026	0.006	-0.0009	0.0028	-0.00022		0.2071	0.0302	1.3357	0.0237	0.4634	0.0375	0.992	0.0275	0.5518	0.0292	0.591667
	LEU-89	0.8029	0.0359	0.3947	0.0209	0.9027	0.0337	0.5585	0.0292	1.0243	0.038	0.73662		-0.0598	0.0316	-0.0565	0.026	-0.1361	0.0303	-0.0593	0.0237	-0.0489	0.0258	-0.07212		-0.0035	0.004	0.0116	0.0101	-0.008	0.0089	0.0331	0.0106	-0.0141	0.0083	0.00382		0.7416	0.0492	0.3498	0.0353	0.7592	0.0453	0.5323	0.0389	0.9597	0.0439	0.5571
	VAL-90	1.0379	0.0346	0.3265	0.0275	0.9265	0.0489	0.4461	0.0294	0.8899	0.0461	0.72538		-0.1298	0.0213	-0.0933	0.0128	-0.1839	0.0176	-0.1052	0.0137	-0.2375	0.0197	-0.14994		0.0117	0.008	0.0204	0.0127	0.0127	0.0078	0.0242	0.0133	0.0005	0.0067	0.0139		0.9202	0.0381	0.2532	0.0272	0.7566	0.0422	0.3666	0.0349	0.6528	0.0396	0.491567
	ASP-91	90.1454	0.5521	88.9516	0.6008	100.343	0.6236	93.502	0.4513	98.8092	0.4565	94.3502		-3.011	0.1766	-1.9932	0.1361	-5.7622	0.2045	-1.6891	0.1661	-6.1636	0.1797	-3.72382		0.007	0.0034	0.0058	0.0026	0.0011	0.0039	-0.0042	0.0029	-0.0021	0.0033	0.00152		87.1359	0.4755	86.9333	0.5723	94.5658	0.5194	91.8217	0.398	92.6284	0.378	75.5142
	THR-92	0.8157	0.2007	2.6887	0.2194	2.7409	0.241	1.0147	0.17	3.4103	0.2697	2.13406		-0.3812	0.0949	-0.6064	0.0608	-1.1774	0.1074	-0.3091	0.0606	-1.6167	0.1394	-0.81816		0.0185	0.0084	-0.0115	0.0094	0.0086	0.0073	-0.009	0.0078	-0.0076	0.0069	-0.0002		0.45	0.138	2.0716	0.1984	1.5806	0.1749	0.6967	0.1405	1.801	0.1594	1.09998
	THR-93	0.5166	0.1186	0.8401	0.1315	1.7973	0.1577	0.3954	0.1141	1.0238	0.1285	0.91464		0.3394	0.0463	0.1445	0.0431	0.2593	0.0746	0.1118	0.0382	0.4753	0.0461	0.26606		-0.0107	0.0039	-0.0027	0.0037	-0.0408	0.0072	0.0034	0.0021	-0.0158	0.0049	-0.01332		0.8453	0.1213	0.9762	0.1235	2.0119	0.126	0.5127	0.1101	1.4799	0.115	0.971
	TYR-94	-0.8372	0.0536	-0.1378	0.114	-0.6852	0.0737	-1.2625	0.0821	-0.8747	0.0786	-0.75948		0.2404	0.0509	0.1895	0.0448	0.367	0.0478	-0.1243	0.0417	0.5032	0.0388	0.23516		-0.0059	0.0067	-0.0141	0.0069	0.0079	0.0054	-0.0027	0.0047	0.006	0.0046	-0.00176		-0.6027	0.0707	0.0383	0.1193	-0.312	0.0838	-1.3901	0.0941	-0.3654	0.0822	-0.43865
	ALA-95	1.9152	0.0597	3.2085	0.0849	2.5424	0.0837	1.6644	0.0478	2.6357	0.0699	2.39324		-0.4379	0.0297	-0.4729	0.0253	-0.8457	0.0293	-0.2026	0.0153	-0.9703	0.0256	-0.58588		-0.0084	0.0078	-0.0188	0.0082	-0.0222	0.0087	0.026	0.0086	0.0083	0.0067	-0.00302		1.4673	0.0614	2.715	0.0858	1.6762	0.0744	1.4912	0.0532	1.6725	0.0644	1.5037
	GLU-96	82.9597	0.277	88.2958	0.2459	91.6624	0.2554	80.8893	0.2165	89.0138	0.2434	86.5642		-1.9712	0.1282	-1.9559	0.1169	-3.5871	0.114	-1.2922	0.0924	-3.6995	0.1065	-2.50118		-0.0138	0.0052	-0.0159	0.0064	-0.0024	0.0085	0.0166	0.0049	0.0061	0.0047	-0.00188		80.9683	0.2779	86.3249	0.2402	88.0747	0.2299	79.6256	0.2356	85.3255	0.235	70.0532
	SER-97	4.0691	0.1422	5.8031	0.1057	-5.0521	0.2679	-4.1984	0.1343	-3.3697	0.2731	-0.5496		-2.586	0.0986	-4.0032	0.0875	1.4373	0.1958	0.6683	0.0613	0.3156	0.2042	-0.8336		-0.0256	0.0097	-0.0374	0.0069	-0.0189	0.0078	-0.0168	0.0044	-0.0127	0.0087	-0.02228		1.4611	0.1023	1.7618	0.0834	-3.6446	0.1462	-3.543	0.1069	-3.068	0.1501	-1.17212
	ASP-98	80.0724	0.212	81.064	0.1868	85.4462	0.203	79.5543	0.1995	84.1191	0.2113	82.0512		-1.8205	0.0981	-2.0958	0.0842	-3.1722	0.0926	-1.0207	0.0651	-3.3491	0.0811	-2.29166		0.0035	0.004	0.0103	0.0042	-0.0023	0.0046	0.0075	0.0032	0.0002	0.0029	0.00384		78.2599	0.1849	78.9767	0.1754	82.2679	0.199	78.5393	0.1939	80.7716	0.1823	66.4692
	LYS-99	-85.6084	0.368	-82.8622	0.3032	-86.5766	0.322	-82.1375	0.2464	-86.4325	0.3364	-84.7234		0.8367	0.1278	0.1256	0.1074	1.3605	0.1054	0.451	0.1044	0.9609	0.1088	0.74694		0.013	0.0084	-0.0025	0.0079	0.0119	0.0094	0.0026	0.0102	0.0106	0.0079	0.00712		-84.7601	0.3391	-82.7277	0.3068	-85.1982	0.3223	-81.6766	0.2563	-85.4514	0.3058	-69.969
	TRP-100	0.8147	0.0302	0.6683	0.0273	1.001	0.0373	0.6723	0.0274	1.1002	0.0321	0.8513		-0.1232	0.0115	-0.1493	0.013	-0.2206	0.0128	-0.1119	0.0109	-0.2879	0.0142	-0.17858		-0.0018	0.0062	0.0223	0.007	0.0109	0.0061	0.02	0.0063	0.0074	0.0054	0.01176		0.6896	0.0326	0.5417	0.0276	0.7912	0.0342	0.5798	0.0281	0.8183	0.0296	0.5701
	VAL-101	-0.9599	0.0156	-1.0553	0.0155	-1.0171	0.0179	-0.9324	0.0159	-1.0334	0.0199	-0.99962		0.053	0.004	0.0663	0.003	0.0925	0.0049	0.0322	0.0033	0.105	0.0045	0.0698		0.0009	0.0074	0.0164	0.0079	0.0124	0.0067	-0.0125	0.0068	-0.0152	0.0084	0.0004		-0.9052	0.0161	-0.9716	0.0178	-0.9118	0.0176	-0.9123	0.0186	-0.9432	0.0196	-0.774017
	LEU-102	-0.4007	0.015	-0.4847	0.0158	-0.3302	0.0153	-0.2943	0.0138	-0.3315	0.016	-0.36828		0.0115	0.0179	0.0294	0.0135	-0.0278	0.0159	-0.0083	0.0164	0.0102	0.0179	0.003		0.0383	0.0132	0.0182	0.0112	0.0147	0.0158	0.0058	0.0118	-0.0228	0.0133	0.01084		-0.3513	0.0253	-0.4366	0.0208	-0.3437	0.0243	-0.2974	0.0239	-0.3445	0.0262	-0.295583
	LEU-103	-0.2385	0.0119	-0.2062	0.0144	-0.1213	0.0159	-0.1603	0.0114	-0.1543	0.0149	-0.17612		0	0.0073	-0.0029	0.0066	0.0275	0.0095	-0.0035	0.008	0.0136	0.0094	0.00694		0.0222	0.0073	0.0068	0.0079	0.0038	0.0076	-0.0305	0.0095	-0.0002	0.0076	0.00042		-0.2167	0.0156	-0.2029	0.0183	-0.0894	0.0196	-0.1943	0.0176	-0.1418	0.0185	-0.14085
	SER-104	-0.0719	0.0266	-0.1139	0.0298	-0.4818	0.0286	-0.2359	0.0311	-0.566	0.0281	-0.2939		-0.0061	0.0267	-0.0168	0.0317	-0.0027	0.0278	-0.0776	0.0309	-0.004	0.0319	-0.02144		0.0078	0.0079	0.0005	0.0067	0.007	0.0091	0.0194	0.0097	-0.0084	0.0095	0.00526		-0.0692	0.0387	-0.1299	0.0449	-0.478	0.0419	-0.2914	0.0452	-0.579	0.0429	-0.257917
	PRO-105	-0.0427	0.0074	-0.0791	0.0076	0.1439	0.0072	0.0881	0.0088	-0.0761	0.0158	0.00682		-0.0058	0.0119	0.0058	0.0113	-0.0086	0.0087	-0.0104	0.0096	-0.0051	0.0121	-0.00482		0.0111	0.0067	-0.0174	0.0077	0.0012	0.0071	-0.0081	0.0057	-0.016	0.0071	-0.00584		-0.0373	0.0149	-0.0914	0.0163	0.137	0.0129	0.0696	0.0143	-0.0983	0.0193	-0.0034
	GLU-106	30.8635	0.0707	30.0994	0.0669	32.1691	0.0781	31.0477	0.0739	31.5338	0.0696	31.1427		-0.3203	0.0571	-0.2387	0.0529	-0.4582	0.0418	-0.276	0.0437	-0.4727	0.0602	-0.35318		0.0088	0.0066	0.007	0.0075	0.0094	0.0088	0.0065	0.0063	0.0059	0.0073	0.00752		30.5561	0.0792	29.8665	0.0822	31.7222	0.0796	30.7842	0.0855	31.072	0.0831	25.6668
	PHE-107	-0.1992	0.0072	-0.207	0.0064	0.0069	0.0114	-0.02	0.0095	0.0443	0.0123	-0.075		-0.0152	0.0161	0.0128	0.0172	-0.2188	0.0233	-0.24	0.021	-0.146	0.0225	-0.12144		-0.014	0.0055	-0.0145	0.007	0.0014	0.0067	-0.0209	0.0068	0.007	0.0056	-0.0082		-0.2287	0.0179	-0.2092	0.0195	-0.2091	0.0268	-0.2801	0.0248	-0.093	0.027	-0.170017
	ARG-108	-27.1848	0.1406	-26.0003	0.0986	-30.0691	0.1478	-28.6046	0.1623	-30.2224	0.1482	-28.4162		-0.2696	0.0581	-0.2174	0.0598	-0.2599	0.0522	-0.4562	0.0586	-0.1744	0.0503	-0.2755		0.0041	0.0037	-0.0059	0.0046	-0.012	0.0057	-0.0044	0.007	0.0076	0.0075	-0.00212		-27.4494	0.1556	-26.2264	0.1194	-30.3414	0.1546	-29.0589	0.1642	-30.3912	0.1483	-23.9112
	ALA-109	0.2552	0.0067	0.2492	0.0056	-0.4488	0.0066	-0.423	0.0065	-0.4041	0.0097	-0.1543		-0.0422	0.0155	-0.0177	0.0138	-0.0399	0.0152	-0.05	0.0146	-0.0649	0.0262	-0.04294		-0.0053	0.0068	-0.0148	0.0076	0.0067	0.0073	0.0098	0.0064	0.0075	0.0052	0.00078		0.2086	0.0186	0.2172	0.0168	-0.4818	0.0179	-0.4643	0.0167	-0.4624	0.0287	-0.163783
	ILE-110	-0.1456	0.0043	-0.1301	0.0034	0.0921	0.0077	0.1139	0.0063	0.1843	0.0037	0.02292		-0.1274	0.0256	-0.0191	0.0245	-0.0155	0.0045	-0.0063	0.0039	0.0018	0.0062	-0.0333		-0.0039	0.0054	0.0015	0.0058	0.0003	0.0089	0.0223	0.0098	-0.0137	0.0093	0.0013		-0.2766	0.0275	-0.1477	0.0255	0.0771	0.0123	0.13	0.0117	0.1724	0.0119	-0.00746667
	TRP-111	-0.3243	0.0095	-0.415	0.0109	-0.7808	0.0074	-0.7097	0.0078	-0.0083	0.0089	-0.44762		-0.072	0.028	-0.0621	0.0298	-0.207	0.0274	-0.1476	0.0265	-0.1065	0.0308	-0.11904		-0.0029	0.012	-0.0181	0.0105	-0.0143	0.0086	0.0078	0.0081	0.0013	0.0068	-0.00524		-0.3974	0.0321	-0.4947	0.0319	-1.0026	0.0304	-0.8484	0.0296	-0.1128	0.0335	-0.475983
	GLN-112	0.7342	0.0091	0.7558	0.01	0.7367	0.0114	0.6607	0.0131	0.7896	0.0119	0.7354		-0.1311	0.0366	-0.0987	0.0349	-0.1967	0.0318	-0.1536	0.0333	-0.1119	0.0295	-0.1384		-0.0036	0.0038	-0.0035	0.0042	-0.012	0.0039	0.0017	0.0025	-0.0019	0.0035	-0.00386		0.6002	0.0384	0.653	0.0374	0.5261	0.0351	0.5078	0.037	0.6744	0.0328	0.493583
	ASP-113	25.9778	0.0622	25.6478	0.0531	27.4111	0.0696	27.0058	0.0712	27.6199	0.0628	26.7325		-0.1785	0.0647	-0.1923	0.0602	-0.2907	0.0637	-0.2584	0.0624	-0.241	0.0609	-0.23218		-0.0031	0.0064	-0.0082	0.0042	-0.0001	0.0075	-0.0167	0.0087	-0.006	0.0078	-0.00682		25.8023	0.0817	25.4458	0.0747	27.1206	0.0898	26.7299	0.0949	27.3786	0.0844	22.0795
	ARG-114	-25.6868	0.0942	-26.076	0.0619	-26.0114	0.0792	-26.8267	0.0977	-26.1912	0.0677	-26.1584		-0.2322	0.0644	-0.1351	0.0674	-0.382	0.0528	-0.3434	0.059	-0.1734	0.0511	-0.25322		0.0002	0.0043	0.0024	0.0052	-0.0032	0.0031	-0.0017	0.0076	-0.0116	0.0064	-0.00278		-25.9139	0.1084	-26.2037	0.0895	-26.3994	0.0972	-27.1702	0.1222	-26.3781	0.0864	-22.0109
	LYS-115	-24.9448	0.1203	-24.6696	0.1059	-26.283	0.1491	-25.6257	0.1026	-27.132	0.1181	-25.731		-0.4009	0.1238	-0.4608	0.1127	-0.6825	0.1127	-0.5102	0.0958	-0.4799	0.11	-0.50686		0.0041	0.0035	0.0042	0.0037	0.0009	0.0044	-0.0124	0.0071	-0.0173	0.0087	-0.0041		-25.3478	0.1744	-25.1357	0.1617	-26.9568	0.1879	-26.1477	0.1441	-27.6307	0.1535	-21.8698
	ARG-116	-24.5152	0.0746	-23.28	0.0666	-25.9096	0.0987	-25.8514	0.1035	-25.9593	0.0921	-25.1031		-0.2469	0.0538	-0.1802	0.0535	-0.223	0.0449	-0.1658	0.0443	-0.2044	0.0499	-0.20406		-0.0008	0.0076	0.0014	0.0051	0.0035	0.0074	-0.0034	0.0077	0.0029	0.0085	0.00072		-24.762	0.0873	-23.4626	0.0927	-26.1279	0.1078	-26.0234	0.0995	-26.1648	0.0978	-21.0901
	CYS-117	0.6121	0.0153	0.7944	0.0148	0.7298	0.0158	0.5638	0.0172	0.6955	0.0131	0.67912		-0.0182	0.0131	-0.0237	0.0138	-0.0394	0.0072	0.0042	0.007	-0.059	0.0058	-0.02722		-0.0085	0.0115	0.0098	0.0087	0.0014	0.0061	0.0028	0.0097	0.0029	0.0053	0.00168		0.5856	0.0213	0.7802	0.0226	0.6915	0.0177	0.5703	0.0206	0.6397	0.0143	0.54455
	GLU-118	29.4297	0.077	28.2075	0.0701	31.5236	0.1039	30.5122	0.1009	31.3295	0.0908	30.2005		-0.3656	0.0639	-0.0981	0.075	-0.3847	0.0485	-0.2107	0.0488	-0.2544	0.0481	-0.2627		0.0209	0.0128	0.0317	0.0147	0.0403	0.0109	-0.0359	0.0125	0.0355	0.014	0.0185		29.0856	0.1026	28.1422	0.0954	31.1819	0.1059	30.2683	0.101	31.1095	0.0958	24.9646
	TYR-119	0.5328	0.0096	0.5393	0.0082	0.759	0.009	0.665	0.0084	0.6017	0.0098	0.61956		-0.0979	0.0276	-0.0719	0.0253	-0.0981	0.022	-0.1323	0.022	-0.1188	0.022	-0.1038		-0.0016	0.0093	-0.0028	0.0077	0.0003	0.0075	-0.0193	0.0078	-0.0215	0.0074	-0.00898		0.4343	0.03	0.4639	0.03	0.6618	0.024	0.5127	0.0256	0.4609	0.0253	0.422267
	TRP-120	0.5404	0.0092	0.5005	0.0104	0.5971	0.0102	0.5222	0.0091	0.6072	0.0103	0.55348		-0.0281	0.0074	-0.0329	0.0086	-0.0363	0.0048	-0.0088	0.0041	-0.0445	0.0065	-0.03012		-0.0055	0.0076	0.0039	0.0064	0.0163	0.0064	-0.0009	0.008	-0.0031	0.0041	0.00214		0.5072	0.0148	0.4717	0.0145	0.578	0.0112	0.5133	0.0117	0.5592	0.0126	0.438233
	PHE-121	0.7111	0.0115	0.6997	0.0112	0.874	0.0116	0.5681	0.0134	0.7891	0.0129	0.7284		-0.0455	0.0064	-0.0335	0.0075	-0.079	0.0046	-0.0257	0.0054	-0.0857	0.0051	-0.05388		0.0236	0.0152	0.0187	0.0128	0.0317	0.0101	-0.0011	0.0079	0.0053	0.0066	0.01564		0.6888	0.0192	0.6847	0.0172	0.8266	0.0152	0.5412	0.0149	0.7082	0.0135	0.574917
	LEU-122	0.915	0.0084	0.8872	0.0088	1.0959	0.0086	0.9659	0.0067	0.993	0.0088	0.9714		-0.038	0.0033	-0.0482	0.0045	-0.0747	0.0041	-0.0229	0.0031	-0.0862	0.0035	-0.054		-0.0315	0.0098	0.0001	0.0092	0.0032	0.0078	-0.0064	0.0103	-0.0142	0.0094	-0.00976		0.8452	0.0132	0.8393	0.0128	1.0252	0.0107	0.9361	0.0125	0.8926	0.0123	0.7564
	GLN-123	0.6556	0.0233	0.7188	0.0259	0.2599	0.0144	0.2334	0.0148	0.2845	0.0207	0.43044		-0.0184	0.0152	-0.0178	0.0163	-0.1064	0.0275	-0.0688	0.0282	-0.1119	0.0291	-0.06466		0.0118	0.0069	0.0004	0.0065	0.0242	0.0109	0.0302	0.01	0.021	0.0072	0.01752		0.648	0.0289	0.7008	0.0327	0.1786	0.0326	0.1952	0.0344	0.1928	0.0356	0.319233
	GLN-124	1.4922	0.0206	1.6982	0.0238	1.4891	0.0223	1.2077	0.0216	1.5552	0.0222	1.48848		-0.0672	0.0145	-0.0916	0.0156	-0.0701	0.017	-0.0269	0.0165	-0.0949	0.013	-0.07014		0.0087	0.0068	0.0134	0.008	0.0342	0.0088	0.0022	0.0075	0.0146	0.0071	0.01462		1.4339	0.0263	1.6191	0.0278	1.4534	0.0274	1.1833	0.0271	1.4735	0.0236	1.19387
	ILE-125	1.2172	0.0128	1.2396	0.0094	1.2164	0.0129	1.1205	0.0093	1.2008	0.011	1.1989		-0.0601	0.0067	-0.0709	0.0057	-0.0953	0.0057	-0.0357	0.0063	-0.1045	0.0057	-0.0733		0.04	0.0131	-0.0082	0.0099	-0.032	0.0116	-0.0119	0.0114	-0.0166	0.0114	-0.00574		1.1971	0.0187	1.1604	0.014	1.0893	0.0162	1.0724	0.0158	1.0791	0.0158	0.93305
	ILE-126	0.573	0.0154	0.2396	0.0259	-0.4796	0.0092	-0.4178	0.0043	-0.4719	0.0058	-0.11134		-0.059	0.0138	-0.016	0.0112	-0.0224	0.0127	-0.0228	0.0111	0.0268	0.0103	-0.01868		-0.0207	0.0102	0.0193	0.0149	0.0509	0.0135	0.0422	0.0171	0.0348	0.0119	0.0253		0.4933	0.0236	0.2427	0.0321	-0.4515	0.0198	-0.3987	0.0205	-0.411	0.0165	-0.0875333
	THR-127	1.2292	0.0326	0.9031	0.0276	0.8393	0.0176	0.7356	0.015	0.8288	0.0164	0.9072		-0.1572	0.0226	-0.1016	0.022	-0.2069	0.0266	-0.1631	0.0271	-0.1431	0.0241	-0.15438		-0.0009	0.0043	0.0114	0.0059	0.0079	0.0069	0.0241	0.0094	0.0322	0.0076	0.01494		1.0694	0.0357	0.8121	0.0337	0.64	0.0307	0.5977	0.0327	0.7185	0.0278	0.639617
	PRO-128	-0.6907	0.0157	-0.3089	0.0432	-0.7842	0.0132	-0.7761	0.0162	-0.7653	0.018	-0.66504		0.0054	0.0188	0.0118	0.0168	-0.022	0.0163	-0.0461	0.0159	0.0477	0.0166	-0.00064		-0.0049	0.0083	0.027	0.013	0.0022	0.0056	0.0049	0.0089	0.0032	0.0046	0.00648		-0.6909	0.0235	-0.2702	0.0435	-0.8041	0.0194	-0.8163	0.0224	-0.714	0.0251	-0.54925
	SER-129	1.0082	0.0339	1.8215	0.03	0.8524	0.0337	0.8331	0.032	0.7172	0.0315	1.04648		-0.1875	0.0255	-0.2579	0.0219	-0.2834	0.0357	-0.2398	0.0328	-0.3161	0.0287	-0.25694		0.0222	0.009	0.0022	0.0053	-0.0033	0.0065	-0.0002	0.0062	0.0006	0.0071	0.0043		0.8425	0.0418	1.5643	0.0364	0.5666	0.0477	0.5919	0.0476	0.401	0.0391	0.66105
	PRO-130	1.7822	0.0136	1.9325	0.0146	1.9797	0.0147	1.7574	0.0111	1.976	0.0134	1.88556		-0.2324	0.0112	-0.2532	0.0076	-0.3928	0.0094	-0.1186	0.0048	-0.4437	0.0089	-0.28814		-0.0152	0.0101	-0.0213	0.009	-0.0165	0.0084	0.0316	0.0086	0.0144	0.0082	-0.0014		1.535	0.0162	1.6579	0.0151	1.5697	0.0154	1.6713	0.0134	1.546	0.0139	1.32998
	ALA-131	1.8053	0.0216	1.8309	0.0227	1.9255	0.0232	1.7207	0.023	1.9058	0.0225	1.83764		-0.291	0.0172	-0.2646	0.0174	-0.435	0.0151	-0.1504	0.0123	-0.4767	0.0167	-0.32354		0.0084	0.006	0.0127	0.0069	0.0073	0.0058	-0.0073	0.0065	0.0067	0.0051	0.00556		1.5221	0.0253	1.5789	0.0251	1.4985	0.0252	1.5622	0.0246	1.4363	0.0238	1.26633
	PHE-132	1.3583	0.0185	1.3368	0.0206	1.3502	0.0264	1.3273	0.0214	1.3564	0.0241	1.3458		-0.2622	0.0156	-0.234	0.0104	-0.3886	0.0116	-0.1841	0.0098	-0.4442	0.0122	-0.30262		0.0158	0.0086	0.0039	0.006	0.02	0.014	0.0191	0.0097	0.0255	0.0136	0.01686		1.1106	0.0221	1.1074	0.0188	0.981	0.0287	1.1625	0.0217	0.9388	0.0272	0.883383
	ASN-133	-0.4126	0.0474	4.6704	0.2204	-0.5664	0.052	-0.2825	0.0463	-0.4012	0.054	0.60154		-0.375	0.0282	-0.7186	0.0461	-0.4121	0.0258	-0.163	0.0258	-0.5603	0.0321	-0.4458		0.0239	0.0094	-0.0023	0.0042	0.0121	0.0085	-0.0276	0.0088	-0.0082	0.0067	-0.00042		-0.7651	0.0531	3.9451	0.1969	-0.9659	0.0475	-0.4743	0.0507	-0.9668	0.049	0.128833
	LYS-134	-68.77	0.2209	-69.4251	0.1825	-73.8318	0.246	-67.9698	0.1958	-73.8284	0.2176	-70.765		1.6529	0.0969	1.2782	0.0777	2.6985	0.0914	0.8158	0.066	3.1449	0.091	1.91806		-0.0267	0.0105	-0.0434	0.013	0.0016	0.0113	0.0259	0.009	0.0148	0.0094	-0.00556		-67.1471	0.1922	-68.1954	0.1762	-71.1343	0.2212	-67.1309	0.1956	-70.6767	0.1998	-57.3807
	VAL-135	1.5775	0.0345	1.2606	0.036	1.4019	0.0343	1.3779	0.0375	1.6364	0.0398	1.45086		-0.3104	0.0195	-0.2235	0.0153	-0.4725	0.0149	-0.1899	0.0125	-0.5345	0.022	-0.34616		0.0352	0.0132	0.0332	0.0085	-0.0071	0.0073	0.0158	0.009	-0.0184	0.0072	0.01174		1.3042	0.0303	1.0694	0.0279	0.9207	0.0265	1.2048	0.0328	1.084	0.0266	0.930517
	LEU-136	0.6047	0.0332	-0.2451	0.0335	0.2784	0.0369	0.2907	0.0377	0.5068	0.0433	0.2871		-0.2494	0.0205	0.0882	0.0161	-0.3038	0.0162	-0.1738	0.0164	-0.4349	0.0256	-0.21474		0.0067	0.0093	0.0167	0.0122	-0.0068	0.0092	0.0041	0.0083	0.016	0.0093	0.00734		0.3631	0.0272	-0.1399	0.0293	-0.0325	0.0305	0.1202	0.0278	0.0874	0.0327	0.0663833
	ALA-137	2.9837	0.0817	1.7372	0.0732	2.6025	0.0866	1.689	0.074	3.3882	0.1008	2.48012		-1.4941	0.0738	-1.2693	0.0504	-1.9231	0.0598	-0.7506	0.0373	-2.6179	0.0739	-1.611		-0.0083	0.0065	-0.014	0.0051	0.001	0.0047	-0.0064	0.0068	-0.0001	0.0054	-0.00556		1.481	0.044	0.4525	0.0409	0.6806	0.0417	0.9331	0.0534	0.7659	0.0468	0.71885
	LEU-138	2.5347	0.0609	1.0504	0.0604	2.0563	0.0561	1.717	0.0624	2.2177	0.0774	1.91522		-0.3541	0.0414	0.0978	0.0268	-0.7468	0.0302	-0.2849	0.0257	-0.6769	0.0482	-0.39298		-0.0028	0.018	-0.0101	0.0124	-0.0255	0.0131	-0.023	0.0142	-0.0123	0.0134	-0.01474		2.1787	0.043	1.1385	0.0447	1.2841	0.0377	1.4103	0.0498	1.5287	0.0499	1.25672
	LEU-139	0.0613	0.0603	-0.9867	0.0508	0.0956	0.059	0.3357	0.0477	0.1981	0.0567	-0.0592		0.2033	0.0346	0.9405	0.0259	0.1234	0.0305	0.0055	0.0261	0.2829	0.0327	0.31112		0.0476	0.0205	-0.0345	0.0152	-0.0888	0.0198	0.0141	0.0132	-0.007	0.0144	-0.01372		0.3103	0.0545	-0.0826	0.0414	0.1331	0.0453	0.3569	0.0387	0.4727	0.041	0.1984
	ARG-140	-68.2985	0.5802	-71.9688	0.6274	-71.302	0.554	-66.1175	0.3553	-78.7216	0.9722	-71.2817		5.4406	0.287	5.6647	0.1742	6.1879	0.1747	1.8229	0.0983	10.9068	0.4015	6.00458		-0.5708	0.0247	-0.5776	0.0219	-0.4096	0.0171	-0.1582	0.014	-0.9413	0.0193	-0.5315		-63.4368	0.5407	-66.8353	0.5799	-65.4817	0.5078	-64.4702	0.3499	-68.7272	0.6765	-54.8252
	LYS-141	-195.964	2.3305	-205.512	1.2615	-230.99	1.9411	-166.359	0.7983	-228.567	1.1308	-205.478		110.36	4.0124	128.759	1.9976	172.829	3.2072	56.9085	0.9796	169.765	1.9963	127.724		-1.4752	0.0376	-1.4573	0.0215	-1.9211	0.0262	-1.2622	0.0217	-1.9826	0.026	-1.61968		-87.0023	1.7682	-78.2358	0.9046	-59.9406	1.3113	-110.726	0.596	-60.812	1.0778	-66.1195
	SER-142	-3.4899	0.1732	-4.223	0.1484	-2.3244	0.0646	-1.7275	0.1306	-2.9753	0.1414	-2.94802		1.1771	0.1007	1.5086	0.0706	0.8346	0.048	0.02	0.0621	1.3986	0.0549	0.98778		-0.0715	0.0073	-0.0697	0.0061	-0.0569	0.0048	-0.068	0.0049	-0.0365	0.0047	-0.06052		-2.3743	0.1223	-2.7843	0.127	-1.5502	0.0557	-1.7802	0.0973	-1.607	0.115	-1.68267
	GLU-143	92.8617	0.6069	75.6166	0.6018	89.1849	0.5171	87.3991	0.5551	99.6519	0.6211	88.9428		4.0419	0.6527	12.0637	0.6385	11.6034	0.5502	12.4359	0.6419	-5.4885	0.3778	6.93128		-0.3763	0.0141	-0.4701	0.0173	-0.4727	0.0143	-0.5098	0.0138	-0.1728	0.0103	-0.40034		96.5214	0.3729	87.208	0.4019	100.309	0.3743	99.3317	0.4103	93.9955	0.4031	79.561
	SER-144	-3.2622	0.0713	-3.7544	0.0614	-3.4016	0.0369	-2.9959	0.0484	-2.9569	0.0562	-3.2742		0.8118	0.0399	1.0826	0.0278	0.8573	0.0225	0.4658	0.0201	0.998	0.0246	0.8431		-0.0076	0.0042	0.0057	0.0062	0.0064	0.0043	0.0148	0.0045	0.0017	0.0043	0.0042		-2.4588	0.0463	-2.6676	0.0561	-2.5374	0.0348	-2.5126	0.0433	-1.9569	0.0441	-2.02222
	TYR-145	-12.0668	0.1485	-9.6173	0.1264	-11.1231	0.1237	-9.7749	0.1264	-11.8165	0.1306	-10.8797		4.1645	0.117	2.9694	0.0928	3.7665	0.0767	3.2009	0.0682	4.4984	0.1298	3.71994		-0.5787	0.015	-0.5368	0.0141	-0.5884	0.0129	-0.4835	0.0162	-0.4453	0.0152	-0.52654		-8.4809	0.1026	-7.1891	0.1	-7.9518	0.096	-7.0568	0.1049	-7.7618	0.1028	-6.40673
	TRP-146	-35.2183	0.2563	-32.383	0.2621	-28.7756	0.2019	-27.5743	0.2221	-35.1306	0.2695	-31.8164		21.8753	0.2641	24.8574	0.2199	20.8534	0.1764	19.2418	0.1995	24.6117	0.2359	22.2879		-2.4829	0.0205	-2.3082	0.023	-1.6605	0.0175	-1.7081	0.0186	-2.6784	0.0233	-2.16762		-15.8155	0.2173	-9.8431	0.2048	-9.5782	0.1886	-10.0527	0.1803	-13.1998	0.1927	-9.74822
	LEU-147	-7.2025	0.0378	-6.5824	0.0356	-6.6621	0.0329	-6.546	0.0371	-6.6779	0.0422	-6.73418		2.3879	0.0367	2.3389	0.0308	2.4247	0.0297	2.1088	0.0271	2.0744	0.0318	2.26694		0.0228	0.0127	-0.0079	0.0157	0.0304	0.009	0.022	0.011	-0.0551	0.012	0.00244		-4.792	0.0309	-4.2516	0.0303	-4.207	0.0264	-4.4152	0.0284	-4.6566	0.0294	-3.7204
	VAL-148	-5.7926	0.0426	-5.1969	0.0411	-5.7191	0.041	-5.5422	0.0429	-5.1896	0.0348	-5.48808		1.9333	0.0341	1.6125	0.0375	2.1006	0.034	1.6422	0.0325	1.6003	0.0347	1.77778		0.0323	0.0083	0.001	0.011	-0.033	0.0085	-0.0262	0.0076	-0.0387	0.0118	-0.01292		-3.8259	0.0282	-3.5822	0.021	-3.6539	0.0245	-3.9248	0.0258	-3.6295	0.0224	-3.10272
	GLY-149	-12.9811	0.1945	-11.5393	0.1838	-13.7226	0.1708	-11.7268	0.1773	-11.9918	0.15	-12.3923		9.0288	0.2249	8.2027	0.2102	9.5704	0.1719	6.7576	0.2102	8.5065	0.1579	8.4132		-0.5199	0.0136	-0.477	0.0133	-0.497	0.012	-0.4369	0.0141	-0.3952	0.0069	-0.4652		-4.4691	0.0979	-3.8175	0.0985	-4.6414	0.0935	-5.4113	0.0807	-3.8737	0.0976	-3.70217
	TYR-150	-37.5189	0.4304	-32.8119	0.3795	-30.5531	0.4097	-34.3024	0.4237	-39.0754	0.2486	-34.8523		24.2852	0.2723	21.3752	0.2915	20.0213	0.2319	22.9367	0.319	24.5917	0.1924	22.642		-1.9444	0.0181	-1.9635	0.0176	-1.8856	0.02	-1.956	0.0198	-1.5167	0.0166	-1.85324		-15.1863	0.2324	-13.4025	0.2682	-12.4271	0.2778	-13.3151	0.2445	-15.9838	0.225	-11.7191
	LEU-151	-4.7855	0.0886	-4.5009	0.0769	-4.4383	0.0669	-4.4049	0.0756	-4.1799	0.067	-4.4619		1.4016	0.0731	1.1199	0.0681	0.9596	0.0567	1.0012	0.0599	0.7033	0.0546	1.03712		-0.0184	0.0104	-0.0062	0.0091	-0.0127	0.0073	-0.0137	0.0091	0.003	0.0054	-0.0096		-3.4036	0.028	-3.3869	0.0238	-3.4878	0.0235	-3.4181	0.0281	-3.4725	0.0239	-2.86148
	LEU-152	-2.2282	0.0851	-1.8408	0.0676	-3.5228	0.0824	-3.3838	0.0733	-3.5018	0.0888	-2.89548		-1.4648	0.0676	-1.9107	0.0553	-1.261	0.0964	-0.7483	0.086	-1.5206	0.0773	-1.38108		0.0119	0.0132	-0.0312	0.012	-0.1467	0.0128	-0.0069	0.0099	-0.1623	0.0109	-0.06704		-3.6798	0.0393	-3.7826	0.0494	-4.9332	0.0667	-4.1398	0.0426	-5.1862	0.0531	-3.62027
	ALA-153	-9.4165	0.3954	-10.3151	0.3583	-14.3937	0.2798	-13.523	0.2743	-11.8907	0.3247	-11.9078		4.2953	0.4897	5.5272	0.4527	9.8767	0.3849	8.8572	0.38	6.6336	0.4806	7.038		-0.9552	0.0204	-0.995	0.0209	-1.1409	0.0166	-1.074	0.0174	-1.1298	0.0185	-1.05898		-6.0775	0.148	-5.7459	0.1544	-5.6447	0.1629	-5.7425	0.1588	-6.3876	0.1944	-4.93303
	GLN-154	-9.2705	0.6776	-11.4991	0.7183	-17.6903	0.3543	-14.1796	0.5065	-26.3975	0.4016	-15.8074		7.5707	0.5231	9.8243	0.5978	18.5812	0.4235	15.1123	0.4552	26.0537	0.2581	15.4284		-0.5654	0.0213	-0.5915	0.0214	-0.7161	0.024	-0.5793	0.0167	-1.2309	0.0139	-0.73664		-2.2496	0.2986	-2.268	0.3196	0.1699	0.236	0.3555	0.2234	-1.5647	0.2721	-0.92615
	SER-155	1.4141	0.0491	1.4448	0.0596	2.444	0.1243	1.6296	0.1222	2.2788	0.1508	1.84226		-0.6681	0.0452	-0.7898	0.0522	-0.9772	0.075	-0.4906	0.0819	-0.3946	0.1204	-0.66406		0.0079	0.0055	0.0027	0.0047	0.0023	0.0027	0.0052	0.0038	-0.0059	0.0031	0.00244		0.7534	0.0657	0.6598	0.0758	1.4694	0.0936	1.1443	0.1023	1.8796	0.1135	0.984417
	THR-156	1.1458	0.0531	1.1306	0.0623	0.5523	0.0623	0.1792	0.0692	1.0497	0.0627	0.81152		-0.2563	0.0432	-0.4172	0.0451	-0.6563	0.0406	-0.6575	0.0422	-0.4435	0.0425	-0.48616		-0.0179	0.0095	-0.0261	0.0102	-0.0179	0.0126	0.0088	0.011	0.0199	0.0094	-0.00664		0.8694	0.0565	0.6853	0.0645	-0.1214	0.0632	-0.4704	0.067	0.6213	0.0592	0.264033
	SER-157	0.4858	0.0415	0.1873	0.0547	1.0628	0.0443	1.4594	0.066	1.2293	0.0664	0.88492		-0.1209	0.0448	-0.0321	0.0474	-1.0197	0.036	-0.5929	0.0376	-0.638	0.0414	-0.48072		-0.0028	0.0078	-0.003	0.0079	0.0015	0.0026	0.0064	0.004	0.005	0.0036	0.00142		0.3613	0.0546	0.1509	0.0658	0.047	0.0486	0.8753	0.0636	0.5988	0.0676	0.338883
	GLY-158	-0.0522	0.0136	0.0824	0.0196	0.8887	0.0255	0.8546	0.0268	0.4935	0.0367	0.4534		0.0921	0.016	0.0555	0.0181	0.0056	0.0224	-0.1301	0.0211	-0.002	0.0171	0.00422		-0.0079	0.0042	-0.0072	0.0048	0.0011	0.0047	0.0068	0.0052	0.0002	0.0019	-0.0014		0.032	0.0211	0.1318	0.0247	0.8946	0.0319	0.7332	0.0376	0.4917	0.0341	0.38055
	ASN-159	0.9284	0.0465	0.7452	0.068	0.9774	0.0729	0.9025	0.0766	0.7402	0.0652	0.85874		0.1173	0.0636	0.2788	0.0562	-0.1459	0.0536	-0.2866	0.0444	0.1716	0.0556	0.02704		0.0057	0.0082	0.0045	0.0082	0.0173	0.0078	-0.0015	0.0053	-0.0059	0.0052	0.00402		1.0518	0.0691	1.0306	0.0957	0.8484	0.0808	0.6148	0.0812	0.9055	0.0903	0.74185
	THR-160	-0.483	0.0302	-0.7298	0.0225	-0.5528	0.0356	-0.2877	0.0391	-0.2543	0.0249	-0.46152		-0.0724	0.0243	0.153	0.0228	-0.0377	0.0215	-0.0786	0.0226	0.1293	0.0196	0.01872		-0.0013	0.0022	0.0016	0.0028	0.0044	0.0028	-0.009	0.0034	-0.0415	0.0102	-0.00916		-0.5547	0.036	-0.5776	0.0305	-0.588	0.0348	-0.3771	0.0403	-0.1648	0.03	-0.377033
	MET-161	1.1521	0.0518	0.574	0.0393	0.5582	0.0374	1.6693	0.0331	1.9941	0.0424	1.18954		-0.3181	0.0253	0.1968	0.0286	-0.1234	0.0231	-0.355	0.0162	-0.569	0.0185	-0.23374		0.0343	0.0132	-0.0103	0.0114	-0.0143	0.0083	0.0614	0.014	-0.0558	0.0115	0.00306		0.8693	0.051	0.7606	0.0485	0.4204	0.0371	1.3739	0.0323	1.368	0.0377	0.7987
	ARG-162	-46.5841	0.1507	-38.7687	0.2888	-48.0884	0.1766	-45.3737	0.2438	-36.5654	0.331	-43.0761		1.0596	0.0603	0.0662	0.0753	1.1222	0.0688	0.6843	0.0632	0.4011	0.0804	0.66668		-0.0037	0.0049	0.0026	0.0057	0.0034	0.0044	0.0007	0.0043	-0.0006	0.0063	0.00048		-45.5311	0.1613	-38.69	0.2706	-46.9699	0.1673	-44.6797	0.2275	-36.1707	0.2879	-35.3402
	MET-163	0.0637	0.0546	-0.3329	0.0432	0.2029	0.0525	0.1204	0.0687	-0.3936	0.0399	-0.0679		-0.2377	0.0171	-0.0752	0.0159	-0.3443	0.019	-0.3724	0.0219	-0.1387	0.0165	-0.23366		0.003	0.0051	-0.0043	0.0059	0.0163	0.0057	0.0192	0.0066	-0.0269	0.0078	0.00146		-0.1733	0.053	-0.4131	0.0467	-0.1228	0.0496	-0.2296	0.0643	-0.558	0.0385	-0.249467
	LEU-164	-1.2337	0.0296	-1.5459	0.0325	-1.564	0.0328	-1.4403	0.0357	-0.1501	0.0377	-1.1868		-0.018	0.0111	0.2347	0.0151	0.1134	0.0164	0.0977	0.0162	-0.3354	0.0165	0.01848		0.0055	0.0092	0.0153	0.0086	0.0074	0.0091	0.0065	0.0098	-0.011	0.0117	0.00474		-1.2461	0.029	-1.2955	0.0325	-1.4437	0.0264	-1.3358	0.0269	-0.4965	0.0317	-0.9696
	GLY-165	0.0885	0.0389	-0.2101	0.0406	-0.8225	0.0482	-0.6706	0.0616	1.6215	0.0328	0.00136		-0.5175	0.0206	-0.2162	0.0233	-0.4757	0.0321	-0.533	0.0329	-0.6319	0.0228	-0.47486		-0.0008	0.0029	0.0022	0.0034	0.0004	0.0007	0.0021	0.0011	0.0073	0.0028	0.00224		-0.4317	0.029	-0.4249	0.0348	-1.2971	0.0258	-1.2023	0.0339	0.996	0.0258	-0.393333
	GLU-166	34.257	0.2696	27.0049	0.2782	44.1331	0.4575	47.5157	0.4539	32.326	0.3046	37.0473		-2.0345	0.1205	-0.7144	0.1214	-5.8521	0.2232	-7.0797	0.2098	-1.027	0.0974	-3.34154		0.0054	0.0036	0.0025	0.0037	-0.0057	0.0043	-0.01	0.0064	-0.0064	0.0048	-0.00284		32.2311	0.2943	26.2949	0.2897	38.2652	0.3197	40.4105	0.3544	31.2752	0.2974	28.0795
	ASP-167	13.992	0.4208	3.2204	0.4739	8.9325	0.4963	9.9	0.5773	13.1345	0.4533	9.83588		-0.4075	0.1316	1.9384	0.1602	0.6052	0.1563	0.1143	0.1551	0.2945	0.1945	0.50898		0.0048	0.0054	0.0097	0.0064	0.017	0.0072	0.0162	0.0079	-0.0348	0.0073	0.00258		13.554	0.424	5.1843	0.4293	9.5358	0.4156	10.0475	0.5046	13.3746	0.3861	8.61603
	TYR-168	-2.6156	0.1557	-2.7437	0.1697	-5.4803	0.1216	-5.8138	0.158	-14.4604	0.1531	-6.22276		0.339	0.1272	0.694	0.1565	1.156	0.1231	1.9851	0.136	10.2564	0.099	2.8861		-0.1954	0.012	-0.1484	0.014	-0.0249	0.0088	-0.0601	0.0118	-1.0413	0.0173	-0.29402		-2.4739	0.1008	-2.2026	0.1052	-4.3535	0.0868	-3.8865	0.0848	-5.2444	0.1585	-3.02682
	GLY-169	-5.0107	0.1212	-3.6138	0.1254	-4.9603	0.117	-5.2136	0.1141	-0.6341	0.1324	-3.8865		6.3652	0.1018	5.1366	0.0983	2.984	0.086	3.0885	0.0815	2.1323	0.1419	3.94132		-0.8124	0.0072	-0.7788	0.0103	-0.7183	0.0094	-0.7239	0.0093	-0.4635	0.013	-0.69938		0.5475	0.1085	0.7395	0.1091	-2.6897	0.0994	-2.8492	0.0943	1.028	0.0819	-0.537317
	VAL-170	-8.5786	0.0829	-7.5003	0.1035	-14.0419	0.1304	-13.6073	0.1287	-5.189	0.0815	-9.78342		3.0759	0.0401	2.6833	0.0683	3.9571	0.0864	3.7068	0.0926	1.3019	0.0371	2.945		-0.0479	0.0068	-0.2504	0.0116	-0.9146	0.0136	-0.944	0.0148	-0.0463	0.0099	-0.44064		-5.5509	0.0744	-5.0712	0.0722	-11.006	0.1107	-10.8431	0.1179	-3.9329	0.0677	-6.06735
	SER-171	-14.9307	0.2662	-11.6063	0.3391	-9.2081	0.2918	-5.9013	0.2844	-4.5808	0.127	-9.24544		14.3264	0.217	11.306	0.3364	10.8092	0.2816	8.3336	0.2916	3.5518	0.1344	9.6654		-0.8822	0.0132	-0.5207	0.0183	-0.4689	0.0139	-0.3571	0.0135	-0.1339	0.0089	-0.47256		-1.4808	0.1748	-0.8216	0.1748	1.1408	0.1307	2.0856	0.147	-1.1561	0.129	-0.0386833
	TYR-172	-3.3345	0.0772	-2.1932	0.0766	-0.1893	0.0508	0.0012	0.0477	-1.5242	0.0646	-1.448		-0.0392	0.0443	0.3533	0.0426	0.3509	0.0333	0.2539	0.034	-0.3018	0.0388	0.12342		-0.0014	0.0026	-0.0017	0.0055	-0.0102	0.0057	-0.01	0.0069	0.0051	0.0061	-0.00364		-3.3783	0.0761	-1.8427	0.0759	0.1512	0.0531	0.2459	0.0515	-1.822	0.0785	-1.10765
	THR-173	-1.0673	0.0654	-2.8461	0.1159	-0.666	0.1165	-0.6159	0.0997	-0.3403	0.0645	-1.10712		-0.1423	0.049	0.3158	0.0537	0.211	0.0477	0.0984	0.0357	-0.2216	0.0371	0.05226		-0.0002	0.0031	-0.0077	0.006	0.0014	0.0059	-0.0003	0.0054	0.0009	0.0041	-0.00118		-1.2063	0.082	-2.5416	0.1177	-0.4542	0.1302	-0.5132	0.1046	-0.5605	0.079	-0.8793
	HIS-174	-1.4437	0.137	-2.9624	0.3109	-1.0316	0.1804	-1.1469	0.175	-1.4627	0.1804	-1.60946		2.0213	0.1285	4.4853	0.282	1.536	0.1368	1.1211	0.1295	1.4822	0.0942	2.12918		-0.376	0.0203	-0.716	0.0253	-0.5426	0.0231	-0.4014	0.0219	-0.0918	0.0164	-0.42556		0.2028	0.1058	0.8106	0.1706	-0.0451	0.1462	-0.4256	0.1576	-0.0734	0.1772	0.0782167
	PHE-175	-2.0173	0.0446	-1.6227	0.0422	-1.7091	0.0407	-1.729	0.0437	-1.1055	0.0393	-1.63672		1.1643	0.0228	0.8243	0.0311	1.1124	0.018	1.0641	0.0186	0.1704	0.0222	0.8671		0.0162	0.0069	0.0006	0.0063	0.0081	0.003	0.0026	0.0025	0.0152	0.0082	0.00854		-0.8373	0.0364	-0.7977	0.0347	-0.589	0.038	-0.663	0.0415	-0.921	0.0417	-0.634667
	ARG-176	-51.138	0.213	-48.7891	0.3101	-55.336	0.3994	-52.6152	0.2483	-50.2271	0.249	-51.6211		2.6876	0.0864	0.6121	0.0711	1.3121	0.0799	0.9806	0.0682	0.7572	0.0568	1.26992		-0.0093	0.0049	0.002	0.0069	-0.0045	0.0044	-0.0044	0.0047	0.013	0.008	-0.00064		-48.475	0.201	-48.1693	0.3065	-54.0291	0.3614	-51.6407	0.2364	-49.4508	0.2527	-41.9608
	ARG-177	-95.6717	0.3204	-84.5579	0.3441	-90.6945	0.7018	-94.7428	0.5486	-87.6939	0.2552	-90.6722		2.9049	0.106	0.1058	0.1164	2.0284	0.2013	2.6931	0.1605	0.7339	0.0661	1.69322		-0.0149	0.0087	0.0046	0.0074	0.0139	0.0051	0.0281	0.0074	0.003	0.0088	0.00694		-92.7785	0.2858	-84.445	0.308	-88.6364	0.5458	-92.0004	0.4733	-86.9531	0.2423	-74.1356
	LEU-178	-1.7176	0.0225	-1.7171	0.028	-2.2141	0.036	-1.6726	0.0744	-0.6558	0.0992	-1.59544		0.1639	0.012	0.0062	0.0155	0.076	0.0109	0.0616	0.0129	0.1261	0.0131	0.08676		0.0077	0.0088	-0.0124	0.0071	-0.0085	0.0062	-0.0024	0.0082	-0.0067	0.0051	-0.00446		-1.5467	0.0264	-1.7247	0.033	-2.1443	0.0371	-1.6118	0.079	-0.5385	0.0969	-1.261
	CYS-179	1.2795	0.0539	1.2993	0.0502	-1.9628	0.0858	-0.7139	0.045	-1.184	0.0827	-0.25638		-0.0909	0.014	0.0057	0.0191	-0.008	0.0174	-0.0542	0.015	-0.0068	0.0156	-0.03084		0.0078	0.0087	0.0122	0.0109	0.0291	0.0101	0.0465	0.0169	-0.0352	0.0117	0.01208		1.1933	0.0549	1.3188	0.0546	-1.9433	0.0893	-0.7206	0.0535	-1.2226	0.0862	-0.229067
	SER-180	0.632	0.0243	0.5166	0.0264	-1.2086	0.0475	-0.2981	0.0543	-0.5768	0.041	-0.18698		-0.0137	0.0169	0.0037	0.0162	-0.1531	0.0225	-0.059	0.0234	-0.1488	0.0197	-0.07418		0.0096	0.0054	0	0.0062	-0.0022	0.0096	0.0005	0.0096	-0.0197	0.0088	-0.00236		0.629	0.0271	0.5202	0.0299	-1.3666	0.0518	-0.358	0.06	-0.7453	0.0437	-0.220117
	ARG-181	-85.0335	0.4505	-86.3867	0.5164	-115.529	0.4072	-111.672	0.3664	-97.0711	0.7439	-99.1384		2.5716	0.1929	1.5127	0.159	14.0198	0.3123	7.2637	0.2541	7.3012	0.3927	6.5338		0.029	0.0107	0.0027	0.0124	-0.0183	0.0073	-0.0149	0.0081	-0.0423	0.0115	-0.00876		-82.4353	0.4352	-84.8705	0.4116	-101.528	0.2456	-104.393	0.248	-89.8373	0.422	-77.1773
	ALA-182	0.1076	0.0096	0.0645	0.0121	-0.0878	0.0166	-0.2476	0.0249	-1.2903	0.0173	-0.29072		-0.0248	0.0059	-0.0479	0.0068	-0.0057	0.0089	0.0082	0.0067	0.1364	0.0116	0.01324		-0.0109	0.0048	-0.0035	0.0071	-0.0147	0.0077	-0.0205	0.0079	-0.0197	0.011	-0.01386		0.0717	0.0118	0.0135	0.0142	-0.1072	0.0178	-0.26	0.0253	-1.1745	0.0221	-0.24275
	LEU-183	0.1322	0.0176	0.0291	0.0166	-0.1615	0.017	-1.2332	0.02	-0.2194	0.0226	-0.29056		-0.084	0.012	-0.1288	0.0111	-0.0345	0.0118	0.0792	0.0177	0.1693	0.0131	0.00024		0.0178	0.0105	-0.0141	0.0121	-0.0219	0.0121	-0.0328	0.0124	-0.0419	0.0141	-0.01858		0.0667	0.0234	-0.1139	0.0227	-0.2178	0.0237	-1.1879	0.0277	-0.0899	0.0223	-0.257133
	GLY-184	0.467	0.0181	0.2646	0.0173	0.05	0.0253	0.3615	0.0136	-0.0279	0.0268	0.22304		-0.1049	0.0169	-0.218	0.0199	-0.164	0.0164	-0.0817	0.0169	0.1395	0.0149	-0.08582		0.0043	0.0085	-0.0202	0.0066	-0.0303	0.0085	0.0048	0.0075	0.0038	0.0084	-0.00752		0.3654	0.0265	0.0257	0.0248	-0.1462	0.0287	0.2842	0.0208	0.1158	0.0278	0.107483
	GLY-185	0.6715	0.0119	0.4797	0.0091	0.5341	0.0241	0.4917	0.0142	-0.219	0.0159	0.3916		-0.0625	0.0183	0.0434	0.0174	-0.0531	0.0149	-0.0784	0.0143	-0.0341	0.0125	-0.03694		0.0081	0.0037	-0.0013	0.0038	-0.0078	0.0056	0.0022	0.0022	0.0022	0.0015	0.00068		0.6175	0.0196	0.5217	0.0211	0.4732	0.0233	0.4152	0.0192	-0.2505	0.0182	0.296183
	LYS-186	-21.1995	0.1803	-17.145	0.1664	-20.5008	0.1417	-21.8462	0.1648	-26.6919	0.2148	-21.4767		-0.8179	0.1137	-0.9411	0.1191	-0.8921	0.1098	-0.8197	0.1012	-0.497	0.099	-0.79356		-0.0081	0.0063	-0.0088	0.0086	0.0207	0.0081	0.022	0.0103	-0.0484	0.0102	-0.00452		-22.0209	0.2014	-18.1028	0.1982	-21.3669	0.1689	-22.6515	0.1755	-27.2505	0.2342	-18.5654
	ALA-187	0.1657	0.0226	0.2807	0.0179	0.2746	0.0202	0.5876	0.0249	-0.2837	0.0257	0.20498		0.0603	0.0072	0.1331	0.0097	0.2309	0.0097	0.0665	0.0114	0.309	0.009	0.15996		0.0054	0.0067	-0.0085	0.0069	-0.0055	0.0067	-0.0081	0.0063	-0.0078	0.0074	-0.0049		0.2311	0.0205	0.4056	0.0164	0.499	0.0174	0.6453	0.0206	0.0187	0.0244	0.29995
	LYS-188	-12.0073	0.2285	-8.4073	0.2381	-9.7016	0.181	-8.6388	0.2177	-10.997	0.2117	-9.9504		-1.1778	0.1257	-1.576	0.1274	-2.016	0.1063	-1.9456	0.1066	-2.2378	0.107	-1.79064		-0.0019	0.0099	-0.0162	0.0119	-0.0369	0.012	0.0017	0.0085	0.0306	0.0084	-0.00454		-13.187	0.2322	-10.0072	0.2148	-11.7601	0.2014	-10.5765	0.1975	-13.2181	0.205	-9.79148
	SER-189	-0.1332	0.0259	-0.0236	0.0274	-0.2057	0.0316	-0.0536	0.0321	-0.3192	0.0314	-0.14706		-0.0922	0.0367	-0.1415	0.0341	-0.1394	0.0373	-0.1341	0.0285	-0.143	0.0342	-0.13004		0.0035	0.003	0.0006	0.0034	0.0018	0.0028	0.0026	0.0023	-0.0019	0.0021	0.00132		-0.2239	0.0435	-0.164	0.0453	-0.344	0.0474	-0.1854	0.0388	-0.4619	0.048	-0.229867
	GLU-190	30.8704	0.138	28.1615	0.1207	32.9412	0.1408	29.3332	0.1866	33.2967	0.1606	30.9206		0.1375	0.0909	1.5405	0.0954	0.5189	0.0868	0.269	0.093	1.0616	0.1004	0.7055		0.0026	0.0061	-0.0093	0.0058	-0.0181	0.0069	0.005	0.0053	0.0002	0.0053	-0.00392		30.9898	0.1371	29.686	0.1399	33.4413	0.1293	29.5991	0.1743	34.3605	0.154	26.3461
	LEU-191	0.3199	0.0183	0.3803	0.0164	0.443	0.0203	0.685	0.0214	0.0906	0.0208	0.38376		-0.1231	0.0103	-0.1615	0.0101	-0.036	0.0095	-0.0786	0.0073	0.0615	0.0089	-0.06754		0.0092	0.01	-0.007	0.0111	0.0051	0.0058	0.0031	0.0069	0.0141	0.0065	0.0049		0.2045	0.0246	0.2122	0.0204	0.4118	0.018	0.6094	0.0204	0.1651	0.0203	0.267167
	ARG-192	-17.275	0.1488	-13.7111	0.1817	-16.057	0.1895	-17.197	0.1472	-15.4453	0.1425	-15.9371		-0.5611	0.0516	-1.1897	0.059	-1.0954	0.0571	-0.5108	0.0481	-1.0121	0.0556	-0.87382		0.003	0.0114	0.0358	0.0133	0.0232	0.0112	-0.0052	0.0076	0.0092	0.0105	0.0132		-17.8218	0.1581	-14.8676	0.1681	-17.1202	0.1849	-17.7016	0.1347	-16.4502	0.1446	-13.9936
	ASN-193	-0.472	0.0393	-0.5131	0.0324	-0.8823	0.0336	-0.7484	0.0445	-0.9184	0.0462	-0.70684		-0.2004	0.034	-0.3298	0.0383	-0.2843	0.0318	-0.1487	0.034	-0.13	0.0365	-0.21864		0.007	0.0085	0	0.0079	0.0009	0.0077	-0.0149	0.0092	0.0016	0.0084	-0.00108		-0.6646	0.0478	-0.8414	0.0502	-1.1667	0.0465	-0.9134	0.0596	-1.048	0.0557	-0.77235
	TRP-194	-0.2514	0.0405	-1.0254	0.0354	-0.7169	0.0282	-0.9796	0.0301	-0.3869	0.0362	-0.67204		-0.176	0.0264	-0.0586	0.0215	-0.4001	0.0222	-0.1821	0.0156	-0.8571	0.0278	-0.33478		0.036	0.0104	-0.0077	0.0138	-0.015	0.0057	-0.0059	0.006	-0.0373	0.0064	-0.00598		-0.389	0.0432	-1.0913	0.039	-1.1338	0.0261	-1.168	0.0246	-1.2818	0.0325	-0.843983
	ARG-195	-18.103	0.3253	-15.0393	0.2506	-16.7119	0.3095	-20.1542	0.3885	-12.342	0.2846	-16.4701		-1.6499	0.1007	-2.5005	0.1159	-3.9112	0.1488	-1.9786	0.1005	-4.4782	0.1564	-2.90368		0.007	0.0092	-0.0154	0.0134	0.0328	0.0104	0.0225	0.0092	-0.0026	0.0122	0.00886		-19.7453	0.3023	-17.5628	0.2149	-20.5904	0.2623	-22.1141	0.3403	-16.8145	0.2126	-16.1379
	MET-196	-0.0074	0.0183	0.1233	0.0216	0.0583	0.0245	0.0531	0.0176	0.1078	0.0233	0.06702		-0.1131	0.0134	-0.1452	0.0137	-0.1865	0.013	-0.1401	0.0124	-0.2368	0.0151	-0.16434		-0.0157	0.013	-0.0069	0.0115	0.0232	0.0122	0.0204	0.0121	0.0177	0.0101	0.00774		-0.137	0.0237	-0.0289	0.028	-0.1039	0.0293	-0.0651	0.0262	-0.1117	0.0302	-0.0744333
	ALA-197	0.1601	0.0122	0.3604	0.0111	0.2162	0.0136	0.1323	0.0131	0.3368	0.0128	0.24116		-0.0776	0.0047	-0.1648	0.0067	-0.1824	0.0073	-0.0957	0.0063	-0.2455	0.0086	-0.1532		-0.0039	0.0047	0.002	0.0076	0.0106	0.0065	0.0136	0.0049	0.0121	0.0053	0.00688		0.079	0.0137	0.1976	0.0155	0.0448	0.0146	0.0505	0.0137	0.1042	0.0144	0.07935
	GLN-198	-1.7474	0.0451	-1.2831	0.038	-1.1637	0.1068	-1.9457	0.0574	-0.7678	0.0843	-1.38154		-0.1822	0.0487	-0.3738	0.0492	-0.4804	0.0599	-0.213	0.0438	-0.944	0.062	-0.43868		0.0048	0.0035	0.0038	0.0037	-0.0011	0.0029	-0.0038	0.0031	-0.0003	0.0029	0.00068		-1.9265	0.0675	-1.6518	0.0607	-1.6473	0.0948	-2.1633	0.0599	-1.7131	0.0759	-1.517
	SER-199	0.2144	0.0245	0.405	0.0241	0.3452	0.0264	0.3367	0.0275	0.3893	0.0285	0.33812		-0.1283	0.041	-0.1452	0.0346	-0.2587	0.0305	-0.2295	0.0313	-0.2581	0.0297	-0.20396		-0.005	0.0044	0.0122	0.0051	0.0003	0.0042	-0.001	0.0042	-0.0099	0.0053	-0.00068		0.0817	0.0431	0.2727	0.0412	0.0875	0.0404	0.1071	0.0422	0.1225	0.0365	0.111917
	LEU-200	-0.0823	0.0081	0.0783	0.0075	-0.0529	0.0088	-0.0938	0.0092	0.0231	0.0085	-0.02552		-0.0202	0.0048	-0.0693	0.0039	-0.0722	0.005	-0.0271	0.0041	-0.1069	0.0065	-0.05914		-0.0072	0.0115	0.0016	0.0099	0.0011	0.0094	0.0015	0.0114	-0.0069	0.0098	-0.00198		-0.11	0.0139	0.0106	0.0125	-0.1236	0.0125	-0.1189	0.0149	-0.0906	0.0145	-0.0720833
	LEU-201	0.091	0.0149	0.382	0.0146	0.2666	0.0154	0.1514	0.0165	0.3709	0.0131	0.25238		-0.0094	0.012	-0.0632	0.0124	-0.0717	0.0105	-0.0499	0.0105	-0.0736	0.0113	-0.05356		-0.0159	0.0129	0.0008	0.012	-0.0355	0.0117	0.0215	0.0092	-0.0095	0.0128	-0.00772		0.0643	0.024	0.3195	0.0219	0.1601	0.0223	0.1227	0.0205	0.288	0.0191	0.1591
	ASN-202	0.0702	0.079	0.1895	0.0966	0.7101	0.1017	-0.0531	0.0905	-0.2624	0.097	0.13086		-0.2769	0.056	-0.2096	0.0476	-0.4207	0.0475	-0.2668	0.0505	-0.2446	0.0482	-0.28372		0.0072	0.0061	0.0048	0.0065	-0.0024	0.0037	0.0004	0.0044	0.011	0.0057	0.0042		-0.1996	0.0949	-0.0204	0.1077	0.2876	0.1074	-0.3255	0.1	-0.4955	0.1122	-0.125567
	SER-203	-0.3903	0.0172	-0.2664	0.0155	-0.2994	0.0184	-0.3201	0.0202	-0.231	0.0148	-0.30144		-0.0946	0.0257	-0.1023	0.0285	-0.2208	0.0279	-0.2776	0.0336	-0.1014	0.0247	-0.15934		0.0037	0.0064	-0.0013	0.0066	-0.0088	0.0079	-0.006	0.0073	0.0102	0.0084	-0.00044		-0.4795	0.0299	-0.3697	0.0338	-0.5299	0.0314	-0.6048	0.0383	-0.3227	0.0311	-0.384433
	VAL-204	0.403	0.0082	0.4825	0.0077	0.5021	0.0082	0.4923	0.0076	0.4564	0.0095	0.46726		-0.0175	0.0148	-0.0191	0.0124	-0.0551	0.0123	-0.0176	0.0109	-0.0443	0.0121	-0.03072		0.0009	0.0175	0.0091	0.0147	0.0185	0.0144	0.0246	0.0145	0.03	0.0113	0.01662		0.3859	0.0238	0.4735	0.021	0.4651	0.0187	0.4986	0.0201	0.4431	0.0179	0.3777
	GLU-205	28.5896	0.1515	29.3694	0.1336	30.2736	0.193	30.8099	0.1388	29.4192	0.1373	29.6923		-0.5636	0.1118	-0.1206	0.1072	-0.3947	0.1078	-0.4619	0.1056	-0.3919	0.1001	-0.38654		-0.003	0.0069	-0.0021	0.006	0.0051	0.0044	0.0144	0.0064	0.007	0.0049	0.00428		28.0252	0.1911	29.2422	0.1792	29.8824	0.2113	30.3653	0.1856	29.0315	0.1694	24.4244
	GLY-206	0.0304	0.0058	-0.0266	0.0069	0.0978	0.006	0.0579	0.0052	0.1294	0.0062	0.05778		-0.0031	0.0091	-0.0164	0.0165	-0.0463	0.013	0.0018	0.0064	0.0007	0.0051	-0.01266		0.0012	0.0023	-0.0053	0.0035	-0.0036	0.0031	-0.0037	0.0019	-0.0034	0.002	-0.00296		0.0281	0.011	-0.0489	0.018	0.048	0.0166	0.0559	0.0079	0.1267	0.0083	0.0349667
	HIS-207	-0.4513	0.0322	-0.5963	0.0427	-0.5992	0.032	-0.5147	0.0327	-0.4793	0.0289	-0.52816		-0.3806	0.0589	-0.1081	0.0478	-0.357	0.0523	-0.2834	0.0491	-0.2954	0.0438	-0.2849		0.0004	0.0047	-0.0093	0.0045	-0.002	0.0049	0.0042	0.0052	-0.0029	0.0048	-0.00192		-0.8313	0.0688	-0.7127	0.0624	-0.9595	0.0652	-0.7972	0.0569	-0.7771	0.0533	-0.679633
	GLU-208	25.7331	0.0965	25.669	0.0993	26.6363	0.1228	26.8537	0.0944	26.0012	0.0837	26.1787		-0.1436	0.0633	-0.0725	0.0512	-0.2463	0.0617	-0.2615	0.0585	-0.1332	0.0618	-0.17142		0.0018	0.0061	-0.0059	0.0064	0.0037	0.0059	-0.0077	0.0068	0.0039	0.0054	-0.00084		25.5929	0.1122	25.5908	0.1144	26.3985	0.1428	26.5927	0.1129	25.8719	0.103	21.6745
	ASN-209	0.1872	0.0143	0.2571	0.0153	0.3021	0.0148	0.2458	0.0159	0.235	0.0138	0.24544		-0.1038	0.0523	-0.1501	0.0472	-0.2168	0.0422	-0.2073	0.0484	-0.1684	0.0444	-0.16928		0.0041	0.0032	-0.0011	0.0039	-0.0062	0.0044	-0.0025	0.003	-0.0021	0.0025	-0.00156		0.0876	0.0525	0.107	0.0473	0.078	0.0472	0.0353	0.0499	0.0643	0.0471	0.0620333
	ILE-210	0.0219	0.0044	-0.0019	0.0053	0.0227	0.0053	0.0401	0.0048	-0.0287	0.0053	0.01082		-0.0442	0.0155	-0.0057	0.0119	-0.0003	0.0085	-0.0378	0.0138	-0.029	0.011	-0.0234		-0.0022	0.0043	-0.0108	0.0042	0.005	0.0037	-0.0008	0.0036	-0.0025	0.0032	-0.00226		-0.0246	0.016	-0.0177	0.0147	0.0276	0.0106	0.0026	0.0138	-0.0598	0.012	-0.0119833
	THR-211	0.0707	0.0046	0.04	0.0047	0.0561	0.0049	0.0707	0.0052	0.0216	0.0046	0.05182		-0.0849	0.0334	-0.1177	0.0287	-0.0856	0.0274	-0.1443	0.029	-0.1355	0.0312	-0.1136		-0.0027	0.0027	0.0071	0.003	-0.0023	0.0025	-0.0005	0.0034	-0.0027	0.0032	-0.00022		-0.0159	0.0347	-0.0695	0.0282	-0.033	0.0277	-0.0745	0.0309	-0.1164	0.0327	-0.05155
	GLN-212	-0.1233	0.0198	-0.2231	0.0157	-0.1318	0.0198	-0.1994	0.0201	-0.2064	0.0154	-0.1768		-0.2288	0.0521	-0.1383	0.0491	-0.3392	0.0483	-0.2596	0.0453	-0.1769	0.0474	-0.22856		-0.0036	0.0048	0.0077	0.0056	0.0005	0.0048	0.005	0.0044	0.0037	0.0045	0.00266		-0.3543	0.0571	-0.3568	0.0496	-0.4717	0.0538	-0.4556	0.0485	-0.3792	0.0487	-0.336267
	LEU-213	-0.0367	0.0047	-0.0958	0.0059	-0.073	0.0054	-0.0488	0.0058	-0.1257	0.0046	-0.076		-0.0029	0.0024	0.0047	0.003	0.005	0.0023	0.0016	0.0019	0.0031	0.002	0.0023		-0.0045	0.01	-0.009	0.0108	-0.0062	0.0157	0.0116	0.0149	-0.0079	0.0141	-0.0032		-0.0435	0.0108	-0.1005	0.0124	-0.0739	0.0161	-0.0356	0.0157	-0.1293	0.0151	-0.0638
	ALA-214	-0.1248	0.0045	-0.1895	0.0047	-0.1792	0.0049	-0.1568	0.0062	-0.1972	0.0041	-0.1695		-0.0028	0.0032	0.0061	0.0032	0.0015	0.0032	0.0005	0.003	-0.0005	0.0028	0.00096		0.014	0.0052	-0.0013	0.0053	0.0064	0.0037	-0.0009	0.003	-0.0043	0.0039	0.00278		-0.1137	0.008	-0.1847	0.0077	-0.1715	0.0071	-0.1573	0.0076	-0.2022	0.0064	-0.138233
	VAL-215	-0.2211	0.0041	-0.2718	0.005	-0.2603	0.0047	-0.26	0.005	-0.2598	0.0044	-0.2546		-0.0726	0.0206	-0.0245	0.021	-0.0527	0.017	-0.0462	0.0172	-0.086	0.0169	-0.0564		0.0021	0.002	-0.002	0.0037	-0.0009	0.0028	0.0026	0.0033	-0.0013	0.0037	0.0001		-0.2914	0.0206	-0.2985	0.0223	-0.3139	0.0191	-0.3042	0.0178	-0.3483	0.0182	-0.259383
	ASN-216	-0.4274	0.0228	-0.5605	0.0244	-0.3616	0.023	-0.4289	0.0267	-0.5069	0.0245	-0.45706		-0.2847	0.0612	-0.199	0.0598	-0.4441	0.0528	-0.3859	0.0493	-0.3004	0.0484	-0.32282		-0.0053	0.005	0.0079	0.0064	-0.0042	0.0052	0.0091	0.0057	0.0006	0.0053	0.00162		-0.7168	0.0652	-0.7512	0.0664	-0.8098	0.0581	-0.8043	0.0586	-0.8066	0.0529	-0.648117
	HIS-217	-1.1449	0.0156	-1.4179	0.0158	-1.4598	0.019	-1.2782	0.0175	-1.4303	0.0174	-1.34622		-0.1769	0.0518	-0.1679	0.0552	-0.3238	0.0405	-0.3711	0.0425	-0.2678	0.0435	-0.2615		0.0012	0.0059	-0.0078	0.0056	-0.0006	0.006	-0.0002	0.0085	-0.0114	0.0058	-0.00376		-1.322	0.0541	-1.5942	0.0565	-1.7845	0.0441	-1.6479	0.0485	-1.7071	0.0467	-1.34262
	GLY-218	-0.3354	0.0058	-0.404	0.0044	-0.4296	0.0054	-0.4098	0.0047	-0.3951	0.005	-0.39478		-0.0633	0.0187	-0.0425	0.0198	-0.0984	0.0197	-0.0667	0.0201	-0.0893	0.0195	-0.07204		0.0056	0.0027	0.0031	0.0027	-0.0009	0.0016	0.0025	0.0023	-0.0016	0.0026	0.00174		-0.3923	0.0205	-0.4431	0.0205	-0.5292	0.02	-0.4734	0.021	-0.4859	0.0204	-0.387317
	TYR-219	0.0142	0.0085	-0.002	0.009	-0.0024	0.0081	0.0537	0.0078	-0.0029	0.0085	0.01212		-0.057	0.0367	-0.1113	0.0358	-0.241	0.0336	-0.1507	0.0288	-0.1791	0.032	-0.14782		-0.0006	0.0067	-0.0004	0.0077	0.0114	0.0072	0.0027	0.0051	-0.0045	0.0071	0.00172		-0.0436	0.038	-0.1139	0.0395	-0.2325	0.0363	-0.0938	0.032	-0.1879	0.0342	-0.11195
	SER-220	0.0905	0.0079	0.1023	0.0086	0.1056	0.0077	0.096	0.0075	0.1135	0.0069	0.10158		-0.1908	0.0454	-0.1417	0.0384	-0.3457	0.0404	-0.2997	0.0366	-0.2336	0.0362	-0.2423		0.002	0.003	0.0027	0.0036	0.0027	0.0035	0.0044	0.0046	-0.0033	0.0038	0.0017		-0.1008	0.0447	-0.0391	0.0388	-0.2363	0.0394	-0.1996	0.0384	-0.1237	0.0367	-0.116583
	SER-221	0.2314	0.0056	0.2359	0.0048	0.2443	0.0065	0.2841	0.0046	0.1975	0.0051	0.23864		-0.0355	0.0261	-0.0514	0.0212	-0.0435	0.0255	-0.0337	0.0237	-0.0669	0.0231	-0.0462		-0.0058	0.005	-0.0018	0.0053	-0.002	0.0061	-0.0001	0.0049	-0.0041	0.0049	-0.00276		0.191	0.0271	0.1837	0.0227	0.1992	0.0263	0.25	0.0263	0.1265	0.0236	0.1584
	PRO-222	0.2179	0.0018	0.1998	0.0019	0.2234	0.0021	0.2354	0.0021	0.2003	0.0021	0.21536		-0.0116	0.0064	-0.0181	0.0067	-0.0395	0.0066	-0.025	0.0054	-0.0269	0.0059	-0.02422		0.0087	0.0066	-0.0006	0.0068	0.0101	0.0065	0.0025	0.008	-0.0053	0.006	0.00308		0.2151	0.0092	0.1817	0.01	0.1945	0.0092	0.2129	0.0093	0.1685	0.0086	0.162117
	SER-223	0.2743	0.007	0.2491	0.0078	0.2866	0.0066	0.2973	0.0073	0.2268	0.0056	0.26682		-0.1072	0.0372	-0.0745	0.0387	-0.1248	0.0338	-0.1514	0.0359	-0.171	0.0323	-0.12578		-0.0047	0.0029	0.001	0.0041	0.0022	0.0026	-0.0005	0.003	0.0005	0.0022	-0.0003		0.1631	0.0386	0.1749	0.0381	0.1637	0.0327	0.1466	0.0373	0.0552	0.0335	0.11725
	HIS-224	0.2174	0.0161	0.2346	0.0119	0.2275	0.015	0.086	0.009	0.4002	0.0148	0.23314		-0.1648	0.0475	-0.1003	0.0408	-0.232	0.0413	-0.1844	0.0333	-0.1938	0.0448	-0.17506		-0.0015	0.004	-0.0024	0.0041	-0.0001	0.0037	0.0011	0.003	-0.0064	0.005	-0.00186		0.0524	0.0491	0.1316	0.0418	-0.0056	0.0436	-0.0971	0.036	0.2031	0.048	0.0474
	PHE-225	0.1888	0.005	0.1374	0.0044	0.2144	0.0046	0.2273	0.0041	0.1765	0.0046	0.18888		-0.0121	0.006	0.0047	0.007	-0.0008	0.0052	-0.013	0.0062	0.0046	0.0055	-0.00332		-0.0092	0.0065	0.0049	0.0073	0.0091	0.0063	-0.0074	0.0061	0.0067	0.0073	0.00082		0.1679	0.0096	0.1464	0.0116	0.2233	0.0095	0.2069	0.0096	0.188	0.0102	0.155417
	SER-226	0.3639	0.0125	0.3371	0.0111	0.3474	0.0111	0.415	0.0118	0.3771	0.0123	0.3681		-0.1427	0.0335	-0.0778	0.0295	-0.233	0.0317	-0.1689	0.0308	-0.132	0.0344	-0.15088		-0.0043	0.0035	-0.0005	0.0034	0.0057	0.003	-0.0031	0.0027	-0.0027	0.0027	-0.00098		0.2168	0.0384	0.2587	0.0314	0.1204	0.0323	0.242	0.0352	0.243	0.0378	0.18015
	SER-227	0.3645	0.009	0.3326	0.009	0.4092	0.0096	0.4218	0.0081	0.3903	0.0086	0.38368		-0.2373	0.0429	-0.1114	0.0399	-0.2538	0.0406	-0.2701	0.0342	-0.1651	0.0342	-0.20754		-0.001	0.004	-0.0069	0.0039	-0.0021	0.0033	0.0005	0.0035	-0.0023	0.0028	-0.00236		0.1273	0.0437	0.2145	0.0413	0.1521	0.0412	0.1519	0.0346	0.2231	0.0356	0.144817
	GLU-228	18.3947	0.094	16.3693	0.0866	17.6415	0.1115	18.4735	0.1042	17.3445	0.0947	17.6447		-0.2502	0.0941	-0.2685	0.0936	-0.1942	0.0854	-0.3831	0.0761	-0.0278	0.0812	-0.22476		0.011	0.0063	0.0008	0.0048	0.0066	0.0061	0.001	0.0049	0.0055	0.0044	0.00498		18.1557	0.1345	16.1041	0.1252	17.4504	0.1266	18.0964	0.1206	17.3302	0.1235	14.5228
	ILE-229	0.4273	0.0048	0.3657	0.005	0.4887	0.0048	0.4794	0.0051	0.4214	0.0052	0.4365		0	0.0039	0.0356	0.0033	0.0124	0.0028	-0.0036	0.0038	0.0224	0.0034	0.01336		-0.0098	0.0097	-0.0176	0.0108	0.0024	0.0094	0.0192	0.0104	0.0025	0.0102	-0.00066		0.4176	0.0118	0.3829	0.0111	0.503	0.0102	0.4947	0.0117	0.4468	0.0124	0.374167
	LYS-230	-20.5474	0.068	-19.4762	0.0693	-20.6058	0.0863	-20.8448	0.0832	-20.2638	0.0689	-20.3476		-0.053	0.1086	-0.1709	0.1007	-0.4099	0.1064	-0.5063	0.0986	-0.3788	0.1015	-0.30378		0.0084	0.0057	-0.0045	0.0052	0.0079	0.0054	-0.0015	0.004	-0.0001	0.0039	0.00204		-20.5903	0.127	-19.6486	0.1266	-21.0056	0.1332	-21.3588	0.1347	-20.6452	0.1184	-17.2081
	GLU-231	20.6148	0.101	18.3682	0.077	19.8702	0.1034	20.5788	0.0848	19.6306	0.1018	19.8125		-0.4662	0.1245	-0.3132	0.1285	-0.5627	0.1102	-0.6516	0.1056	-0.5443	0.1068	-0.5076		0.005	0.0055	-0.0047	0.0051	-0.0116	0.0065	-0.0033	0.0041	-0.0001	0.0045	-0.00294		20.1537	0.1573	18.0315	0.1443	19.2977	0.1544	19.9286	0.1356	19.0886	0.1418	16.0833
	LEU-232	0.4408	0.0072	0.3702	0.0063	0.4833	0.0072	0.476	0.0062	0.4748	0.007	0.44902		-0.0356	0.0126	-0.014	0.0124	-0.0776	0.0123	-0.0503	0.0103	-0.0365	0.0123	-0.0428		0.0036	0.0112	0.0119	0.0111	0.0176	0.0111	-0.0116	0.0108	-0.0055	0.011	0.0032		0.4088	0.0187	0.3677	0.0187	0.4228	0.0194	0.4147	0.0166	0.4329	0.0173	0.34115
	ILE-233	0.6616	0.0046	0.6508	0.0037	0.7169	0.0054	0.6761	0.0056	0.6865	0.0047	0.67838		-0.0147	0.0083	0.0134	0.0065	-0.0518	0.0073	-0.0102	0.0064	-0.0394	0.0073	-0.02054		-0.0021	0.0099	0.0086	0.0163	0.0354	0.0111	0.0267	0.0091	0.0378	0.01	0.02128		0.6443	0.0144	0.6728	0.0175	0.7002	0.0133	0.6923	0.0114	0.6846	0.013	0.5657
	GLY-234	-0.0521	0.0069	-0.0103	0.0071	-0.026	0.0081	-0.0374	0.0082	0.0214	0.0101	-0.02088		-0.032	0.0187	-0.0541	0.0199	-0.0915	0.0176	-0.0645	0.0167	-0.0855	0.0164	-0.06552		0.0007	0.003	0.0025	0.0033	0.0031	0.0032	0.0062	0.0048	0.0004	0.0029	0.00258		-0.0823	0.0211	-0.0624	0.0211	-0.114	0.02	-0.0963	0.0198	-0.0635	0.0195	-0.06975
	VAL-235	-0.3532	0.0079	-0.3553	0.008	-0.4812	0.0071	-0.4545	0.0066	-0.4264	0.0087	-0.41412		0.0181	0.0078	-0.0044	0.0039	-0.0045	0.0072	-0.0046	0.0047	-0.0081	0.0081	-0.0007		0.0037	0.0082	-0.0056	0.0069	0.0018	0.0055	0.0152	0.0056	0.0033	0.0045	0.00368		-0.3315	0.0127	-0.365	0.0118	-0.4839	0.0116	-0.4436	0.0101	-0.4317	0.0128	-0.342617
	SER-236	0.236	0.0101	0.2698	0.0114	0.186	0.0107	0.1165	0.0084	0.2421	0.0111	0.21008		-0.0993	0.0309	-0.1292	0.03	-0.1161	0.0328	-0.0681	0.0295	-0.1474	0.0269	-0.11202		-0.0015	0.003	-0.0024	0.0028	0.0061	0.0027	0.0037	0.0028	0.0029	0.0019	0.00176		0.135	0.0331	0.1361	0.033	0.0759	0.0338	0.0521	0.0298	0.097	0.0293	0.0826833
	PRO-237	0.377	0.0027	0.3852	0.0026	0.3553	0.0038	0.3566	0.0027	0.344	0.0038	0.36362		-0.0221	0.0089	0.0021	0.006	-0.061	0.0086	-0.0265	0.0073	-0.0355	0.0097	-0.0286		0.0135	0.0126	0.0036	0.0125	-0.0064	0.0141	0.0135	0.0137	-0.0027	0.0125	0.0043		0.369	0.016	0.3918	0.0138	0.2875	0.017	0.3438	0.0156	0.3052	0.0179	0.282883
	ARG-238	-23.653	0.0838	-21.7691	0.0707	-22.1624	0.0833	-23.5354	0.0668	-23.6543	0.0628	-22.9548		-0.1743	0.0454	-0.056	0.0526	-0.2674	0.0484	-0.1963	0.045	-0.1307	0.0377	-0.16494		0.0109	0.0074	-0.0129	0.0067	-0.0184	0.007	0.0081	0.0074	-0.0093	0.0043	-0.00432		-23.8218	0.0921	-21.839	0.0855	-22.448	0.0941	-23.7245	0.0844	-23.79	0.0683	-19.2706
	LYS-239	-23.4555	0.0774	-22.5436	0.0692	-24.2768	0.0789	-23.9674	0.0647	-24.021	0.0658	-23.6529		-0.262	0.0998	-0.0977	0.0987	-0.1845	0.0881	-0.4529	0.1068	-0.2416	0.0912	-0.24774		-0.0069	0.0053	0.0019	0.0033	-0.0015	0.0039	-0.0038	0.0046	-0.0068	0.0037	-0.00342		-23.7219	0.143	-22.6369	0.1103	-24.4606	0.1242	-24.429	0.1137	-24.272	0.1138	-19.9201
	LEU-240	0.6098	0.005	0.6218	0.0046	0.6664	0.0053	0.6043	0.0048	0.6769	0.0045	0.63584		-0.0214	0.0048	-0.0131	0.0032	-0.0272	0.0026	-0.0124	0.0018	-0.054	0.0054	-0.02562		-0.0253	0.0118	0.0121	0.011	-0.0115	0.0113	0.0207	0.0101	0.0125	0.013	0.0017		0.5629	0.0136	0.6206	0.0125	0.6277	0.0133	0.612	0.0108	0.6353	0.0146	0.50975
	SER-241	0.44	0.0072	0.4241	0.0079	0.5366	0.0087	0.4837	0.0057	0.5602	0.0053	0.48892		-0.0028	0.013	-0.0164	0.0133	-0.067	0.0129	-0.0098	0.0041	-0.0301	0.0047	-0.02522		-0.002	0.0117	-0.0101	0.0084	0.0298	0.0097	0.0203	0.0116	0.0217	0.0082	0.01194		0.4344	0.0192	0.398	0.0176	0.499	0.0192	0.494	0.0143	0.5513	0.0111	0.396117
	ASN-242	0.3811	0.0191	0.4958	0.0211	0.3996	0.025	0.1876	0.0146	0.3171	0.0216	0.35624		-0.1787	0.0499	-0.1964	0.0538	-0.3596	0.0457	-0.3996	0.0467	-0.2556	0.047	-0.27798		-0.0054	0.0045	-0.0089	0.0038	-0.0012	0.0046	0.0026	0.0031	0.0013	0.0025	-0.00232		0.1964	0.0548	0.2916	0.0611	0.0382	0.0538	-0.2101	0.0516	0.0641	0.0502	0.0633667
	ILE-243	0.3471	0.0079	0.3665	0.0076	0.4755	0.0073	0.4101	0.0062	0.4274	0.0073	0.40532		-0.0039	0.0056	-0.0209	0.0048	-0.026	0.0046	-0.0017	0.0054	-0.024	0.0063	-0.0153		-0.0051	0.0103	-0.0032	0.0084	-0.0133	0.0086	0.0397	0.0108	-0.0131	0.0093	0.001		0.3385	0.0136	0.3424	0.012	0.4361	0.0114	0.4482	0.0125	0.3896	0.0135	0.3258
	ILE-244	0.5278	0.0073	0.5766	0.0069	0.636	0.0072	0.588	0.0058	0.5884	0.0085	0.58336		-0.0425	0.0156	-0.025	0.0119	-0.042	0.0113	-0.0074	0.0122	-0.0411	0.0121	-0.0316		-0.0039	0.0085	-0.0155	0.0067	-0.0055	0.0088	-0.0025	0.01	0.0009	0.0073	-0.0053		0.4815	0.0183	0.5361	0.0149	0.5889	0.0157	0.5778	0.0164	0.5476	0.0164	0.455317
	GLN-245	0.1278	0.0146	0.2496	0.023	0.2798	0.0184	0.1707	0.0158	0.2705	0.0152	0.21968		-0.3646	0.0501	-0.1264	0.053	-0.3342	0.0448	-0.3378	0.0488	-0.3228	0.0431	-0.29716		0.0019	0.0064	-0.0084	0.0068	0.0095	0.0059	0.0087	0.005	0.0114	0.0047	0.00462		-0.2349	0.0541	0.1171	0.0563	-0.0431	0.047	-0.1592	0.0501	-0.0411	0.045	-0.0602
	LEU-246	0.0947	0.0072	0.1171	0.0063	0.2146	0.0069	0.1982	0.0066	0.1815	0.0072	0.16122		-0.0358	0.0147	-0.028	0.017	-0.0132	0.0122	-0.0287	0.0123	0.0074	0.0102	-0.01966		0.0048	0.0052	-0.0099	0.0061	-0.0084	0.0072	0.0083	0.0069	0.0146	0.0067	0.00188		0.0632	0.0175	0.0792	0.0191	0.1936	0.0138	0.1774	0.0155	0.2033	0.0129	0.11945
	ALA-247	-0.1541	0.0118	-0.0567	0.0137	-0.2335	0.0085	-0.2012	0.0084	-0.1229	0.0194	-0.15368		-0.0071	0.0128	0.0014	0.0141	0.0054	0.0115	0.0073	0.011	-0.0164	0.0138	-0.00188		-0.0082	0.0067	0.0029	0.0071	-0.0125	0.0067	-0.0072	0.0057	-0.0032	0.006	-0.00564		-0.1691	0.0198	-0.053	0.0206	-0.241	0.0155	-0.201	0.0154	-0.142	0.024	-0.13435
	ASP-248	34.7427	0.1642	34.2254	0.1738	38.7784	0.1442	37.8672	0.1309	36.5907	0.1661	36.4409		-0.3005	0.1045	-0.2927	0.1202	-0.8777	0.1028	-0.7877	0.1025	-0.7305	0.0892	-0.59782		0.0079	0.0059	-0.0041	0.0055	-0.0079	0.0062	0.0092	0.0072	0.0077	0.0082	0.00256		34.4548	0.1981	33.9254	0.1972	37.8964	0.1658	37.0968	0.1478	35.8804	0.1714	29.8756
	LYS-249	-0.1175	0.2018	2.2315	0.1877	1.0959	0.1859	1.4175	0.1489	2.2437	0.2296	1.37422		-0.6346	0.164	-0.2581	0.149	-0.6766	0.1312	-0.7981	0.1402	-0.6401	0.1132	-0.6015		0.0058	0.0098	0.0086	0.0083	0.0073	0.0129	0.0052	0.0104	0.0042	0.0095	0.00622		-0.7379	0.2527	1.9749	0.2594	0.4245	0.2202	0.6226	0.1896	1.604	0.2449	0.648017
RpoA	PHE-249	18.4898	0.0969	17.9061	0.085	18.1266	0.0833	17.1849	0.0714	18.1601	0.0884	17.9735		-0.7568	0.164	0.394	0.1714	-0.7424	0.176	0.428	0.179	-0.0389	0.169	-0.14322		0.0007	0.016	-0.0199	0.0136	-0.0167	0.0143	-0.0353	0.0202	-0.0283	0.0146	-0.0199		17.7394	0.1918	18.2745	0.1952	17.3582	0.2059	17.5801	0.1957	18.0937	0.1794	14.841
	ASP-250	-18.537	0.127	-17.776	0.1083	-17.9378	0.1031	-17.5551	0.0756	-17.9108	0.0997	-17.9433		-0.3872	0.1629	0.2132	0.157	-0.2823	0.1483	0.1078	0.1462	0.5013	0.151	0.03056		-0.001	0.0102	-0.0152	0.0116	-0.0229	0.012	-0.0041	0.0098	-0.0161	0.0114	-0.01186		-18.9219	0.1949	-17.5672	0.1724	-18.2428	0.1794	-17.4559	0.1746	-17.4169	0.1828	-14.9341
	PRO-251	-0.2049	0.0071	-0.2679	0.0066	-0.2944	0.0073	-0.2964	0.0028	-0.2607	0.0077	-0.26486		-0.0283	0.0155	-0.0209	0.0102	-0.0088	0.0121	0.0026	0.0108	-0.0052	0.014	-0.01212		0.0014	0.0086	0.0158	0.0098	0.0143	0.0099	0.0295	0.0165	0.0058	0.0109	0.01336		-0.2315	0.0186	-0.2734	0.0151	-0.2894	0.0183	-0.2639	0.0188	-0.2603	0.0206	-0.21975
	ILE-252	-0.5147	0.0071	-0.5476	0.0061	-0.6513	0.0089	-0.4088	0.006	-0.5947	0.0082	-0.54342		0.0404	0.0136	0.0732	0.0164	0.1645	0.0134	0.0229	0.0204	0.1216	0.0168	0.08452		0.0367	0.0172	0.0012	0.0174	-0.0038	0.0154	-0.0014	0.0159	0.0145	0.021	0.00944		-0.4364	0.0219	-0.4727	0.0251	-0.4901	0.021	-0.3873	0.0269	-0.4574	0.0274	-0.373983
	LEU-253	-0.618	0.0049	-0.6293	0.0054	-0.669	0.0071	-0.3456	0.0061	-0.6535	0.0049	-0.58308		-0.0226	0.0078	0.0035	0.008	0.0134	0.0095	-0.1049	0.0191	0.0454	0.0074	-0.01304		0.0004	0.0198	-0.0093	0.0237	-0.0597	0.021	-0.0105	0.0152	-0.0828	0.0211	-0.03238		-0.6404	0.0215	-0.6357	0.0247	-0.7157	0.0235	-0.4605	0.027	-0.6917	0.0225	-0.524
	LEU-254	-0.5655	0.006	-0.6184	0.0064	-0.6713	0.0067	-0.3803	0.0056	-0.6394	0.0066	-0.57498		-0.0796	0.0142	-0.0679	0.0149	-0.071	0.015	-0.1541	0.0114	-0.0363	0.0147	-0.08178		0.0641	0.0164	0.0069	0.0134	0.0381	0.0157	-0.0196	0.0134	0.0381	0.0154	0.02552		-0.5819	0.0228	-0.6805	0.0207	-0.7044	0.0223	-0.5532	0.0184	-0.6367	0.0227	-0.526117
	ARG-255	18.8296	0.184	17.9085	0.1372	18.5979	0.1475	19.361	0.138	18.2346	0.1523	18.5863		-0.6729	0.0625	-0.6009	0.07	-1.0656	0.0764	-0.3359	0.0684	-0.7234	0.0753	-0.67974		-0.0014	0.0163	0.0022	0.014	-0.0347	0.0167	-0.0399	0.0171	-0.0425	0.016	-0.02326		18.1584	0.1861	17.306	0.1588	17.4961	0.1646	18.9843	0.1389	17.4657	0.1759	14.9017
	PRO-256	0.3916	0.0095	0.4593	0.0102	0.3724	0.0126	0.2837	0.0095	0.4181	0.0114	0.38502		0.0634	0.006	0.0991	0.0063	0.1244	0.0088	0.1067	0.0064	0.0653	0.0073	0.09178		-0.0149	0.0133	-0.0266	0.0129	-0.0528	0.0118	0.0008	0.0127	-0.0218	0.0118	-0.02306		0.441	0.0159	0.5317	0.0159	0.4438	0.0146	0.3915	0.0168	0.4621	0.0141	0.37835
	VAL-257	0.3735	0.0258	0.414	0.0324	0.4934	0.0279	0.1937	0.0222	0.5276	0.032	0.40044		-0.1054	0.0108	0.0062	0.0141	-0.2126	0.0138	0.0163	0.0131	-0.1661	0.0127	-0.09232		0.0016	0.023	-0.0033	0.0225	-0.0228	0.0276	-0.0544	0.0234	-0.0329	0.0245	-0.02236		0.2713	0.0354	0.4181	0.0353	0.2594	0.0377	0.1546	0.0346	0.3287	0.0334	0.238683
	ASP-258	-34.1186	0.3569	-32.4924	0.2385	-39.3131	0.3162	-33.9156	0.2302	-36.6767	0.2914	-35.3033		5.409	0.2613	6.4359	0.1814	11.1121	0.2634	3.2313	0.1446	9.8249	0.2093	7.20264		0.0547	0.0152	-0.021	0.0154	-0.051	0.0116	0.0333	0.0149	-0.0628	0.0124	-0.00936		-28.6569	0.2552	-26.0758	0.2411	-28.2519	0.2165	-30.6582	0.2184	-26.9048	0.2848	-23.4246
	ASP-259	-21.3696	0.2569	-19.5435	0.2067	-21.8415	0.1973	-21.3411	0.1651	-20.7496	0.2281	-20.9691		0.5137	0.1795	1.7323	0.1794	2.0385	0.1823	1.171	0.1815	1.9967	0.1919	1.49044		-0.0089	0.0126	0.0086	0.012	0.0129	0.013	-0.002	0.0113	-0.02	0.0154	-0.00188		-20.8623	0.2805	-17.8068	0.2566	-19.7954	0.2551	-20.1611	0.2434	-18.7864	0.2707	-16.2353
	LEU-260	-0.8738	0.0282	-0.9711	0.0225	-1.1856	0.0253	-1.266	0.0251	-0.9863	0.0281	-1.05656		0.1833	0.026	0.4698	0.0324	0.2234	0.0277	0.3265	0.0269	0.341	0.0295	0.3088		0.0079	0.0275	0.0702	0.0229	0.0926	0.0235	0.0158	0.0283	0.0284	0.0237	0.04298		-0.6804	0.047	-0.4292	0.0438	-0.8696	0.0414	-0.9259	0.0443	-0.6172	0.0475	-0.58705
	GLU-261	-18.4064	0.2807	-14.4505	0.3797	-17.0989	0.2717	-19.0501	0.4133	-17.0211	0.2817	-17.2054		-0.8623	0.1639	0.9885	0.1995	-0.0665	0.1463	-0.0318	0.2226	0.7841	0.1502	0.1624		0.0048	0.0123	-0.0016	0.01	0.0187	0.0125	0.0213	0.0108	-0.0121	0.0108	0.00622		-19.2652	0.3201	-13.4733	0.4147	-17.156	0.298	-19.0776	0.4054	-16.2579	0.3008	-14.205
	LEU-262	-1.3771	0.0556	-1.454	0.0715	-1.511	0.0732	-2.0025	0.0719	-1.6453	0.0715	-1.59798		0.1741	0.0525	0.4393	0.0484	0.1048	0.048	0.5368	0.0591	0.6457	0.0684	0.38014		-0.0291	0.0193	-0.0213	0.019	0.0337	0.0194	-0.0105	0.0174	0.0283	0.0194	0.00022		-1.2329	0.0638	-1.0384	0.0759	-1.3743	0.0708	-1.4744	0.0634	-0.9746	0.0693	-1.01577
	THR-263	-1.1762	0.0623	-1.5358	0.0696	-1.8066	0.0567	-1.2787	0.0413	-1.434	0.0633	-1.44626		-0.5045	0.048	-0.1145	0.0415	0.0058	0.0353	0.0266	0.0389	-0.4907	0.0446	-0.21546		-0.0308	0.0096	-0.04	0.0099	-0.0423	0.0108	0.0125	0.0095	-0.0741	0.0104	-0.03494		-1.7137	0.0588	-1.6896	0.0627	-1.8437	0.0593	-1.2411	0.0583	-1.9982	0.0516	-1.41438
	VAL-264	-10.9442	0.1244	-10.7788	0.1493	-13.0408	0.1147	-12.1256	0.1386	-9.5326	0.1082	-11.2844		2.5356	0.2078	-0.0345	0.0875	2.728	0.1163	3.4653	0.1142	-1.4057	0.0978	1.45774		-1.549	0.0308	-1.4643	0.0342	-1.443	0.0248	-1.3253	0.0235	-1.4105	0.0265	-1.43842		-9.9677	0.2341	-12.2844	0.1791	-11.7551	0.1649	-9.9842	0.2045	-12.3533	0.1339	-9.39078
	ARG-265	7.2069	0.6137	-1.9524	0.5018	3.345	0.4871	3.2275	0.3934	4.4395	0.4925	3.2533		18.5649	0.4887	22.2743	0.4562	21.9836	0.4105	20.1436	0.4587	22.358	0.5018	21.0649		-1.6339	0.029	-1.8661	0.0268	-1.9859	0.0271	-1.4998	0.0297	-2.0911	0.0263	-1.81536		24.1437	0.431	18.4829	0.4671	23.3231	0.4261	21.8591	0.3737	24.7072	0.3982	18.7527
	SER-266	-1.991	0.0477	-2.4299	0.0418	-2.5979	0.0495	-2.4977	0.0387	-2.3045	0.0431	-2.3642		-0.0981	0.0399	0.2931	0.0309	0.1486	0.0387	-0.0859	0.0388	0.5187	0.033	0.15528		-0.0133	0.0127	-0.0309	0.0116	-0.0174	0.012	-0.035	0.012	-0.0354	0.0104	-0.0264		-2.1006	0.057	-2.1662	0.0421	-2.4664	0.0614	-2.6194	0.0577	-1.8213	0.0359	-1.86232
	ALA-267	-1.7175	0.0502	-1.3735	0.0531	-1.7428	0.0497	-1.8913	0.0366	-1.0264	0.044	-1.5503		0.2315	0.0415	0.0332	0.0344	0.1844	0.0337	0.1555	0.0262	0.207	0.0346	0.16232		-0.016	0.0098	-0.0306	0.0117	-0.0378	0.012	-0.0213	0.0101	0.0203	0.0142	-0.01708		-1.5048	0.0333	-1.3697	0.0392	-1.5971	0.0366	-1.7603	0.034	-0.7991	0.0359	-1.17183
	ASN-268	-23.8795	0.318	-18.2014	0.3476	-27.2115	0.2623	-27.0567	0.2626	-18.9172	0.2585	-23.0533		33.5377	0.4421	29.8825	0.4453	39.7853	0.3793	38.5743	0.3692	25.8788	0.3539	33.5317		-2.17	0.0183	-1.926	0.0216	-2.1575	0.0213	-2.2854	0.0211	-1.82	0.0264	-2.07178		7.4658	0.2689	9.7523	0.3164	10.4096	0.2839	9.2543	0.2521	5.1551	0.2197	7.00618
	CYS-269	-8.4752	0.1431	-7.0312	0.135	-10.3345	0.123	-10.3881	0.1206	-8.4012	0.1784	-8.92604		4.0649	0.1555	1.2619	0.0784	4.1234	0.1226	4.9759	0.1296	2.1601	0.0945	3.31724		-0.4566	0.0138	-0.3437	0.0142	-0.7005	0.0156	-0.702	0.0158	-0.5048	0.0152	-0.54152		-4.8618	0.2085	-6.1152	0.1428	-6.9143	0.151	-6.1121	0.1636	-6.7357	0.151	-5.12318
	LEU-270	-1.19	0.0237	-0.7499	0.0341	-0.8743	0.0301	-0.779	0.0242	-0.6883	0.0247	-0.8563		0.4389	0.0331	-0.324	0.0277	0.2007	0.0265	0.4819	0.0276	-0.1412	0.0217	0.13126		-0.0553	0.0271	-0.0137	0.0271	0.0246	0.0257	-0.0207	0.0266	0.0324	0.0254	-0.00654		-0.8075	0.0437	-1.0858	0.0438	-0.649	0.0417	-0.3183	0.0414	-0.7968	0.0359	-0.609567
	LYS-271	57.1158	0.7515	62.0677	0.7142	71.064	0.6131	63.1123	0.5131	68.239	0.6581	64.3198		-10.161	1.1298	-25.54	0.6511	-26.1897	0.9347	-3.1816	0.6146	-32.3352	0.6583	-19.4815		-0.1489	0.0208	-0.0724	0.019	-0.3057	0.0225	-0.2781	0.0199	-0.1162	0.0202	-0.18426		46.8384	0.731	36.4906	0.4131	44.5581	0.6172	59.6514	0.5321	35.7753	0.3891	37.219
	ALA-272	-8.431	0.1622	-5.6062	0.1151	-6.6833	0.1097	-5.8536	0.0908	-5.6285	0.0799	-6.44052		1.9925	0.1337	1.1238	0.0875	0.3843	0.0699	0.6873	0.0599	0.4199	0.0617	0.92156		-0.6944	0.0228	-0.3967	0.0166	-0.6285	0.0155	-0.5671	0.0154	-0.2588	0.0174	-0.5091		-7.1321	0.1322	-4.8773	0.0961	-6.9259	0.1148	-5.7318	0.1049	-5.468	0.0962	-5.02252
	GLU-273	-38.0382	0.3041	-37.5835	0.3481	-32.3884	0.3779	-28.0454	0.2714	-33.1543	0.2796	-33.842		-3.3855	0.2252	-2.5633	0.1818	-3.0807	0.1796	-4.476	0.1567	-5.3511	0.193	-3.77132		0.0025	0.0122	-0.0316	0.0127	0.0064	0.0115	0.0036	0.0116	0.0115	0.0103	-0.00152		-41.4087	0.2821	-40.1563	0.3248	-35.4531	0.2968	-32.5227	0.2362	-38.4911	0.2838	-31.3387
	ALA-274	-0.2282	0.0239	-0.3065	0.0246	-0.7521	0.0221	-0.8531	0.0198	-0.6425	0.0249	-0.55648		0.0936	0.0295	0.5033	0.0314	0.1715	0.0351	0.4171	0.04	0.5179	0.039	0.34068		0.0233	0.0125	-0.0086	0.0117	0.0112	0.0095	0.0031	0.009	0.012	0.0117	0.0082		-0.1126	0.0379	0.1881	0.0362	-0.5684	0.0423	-0.4331	0.0445	-0.111	0.0446	-0.172833
	ILE-275	-0.74	0.0175	-0.9166	0.0184	-1.057	0.0204	-1.0545	0.0142	-1.0726	0.0194	-0.96814		-0.0345	0.0219	0.248	0.0224	0.0775	0.0217	0.0761	0.026	0.2844	0.0241	0.1303		-0.0348	0.0225	-0.0276	0.0175	-0.0844	0.0216	-0.0849	0.0207	0.0269	0.0187	-0.04096		-0.8103	0.0351	-0.6949	0.0317	-1.063	0.0354	-1.0627	0.0366	-0.7612	0.0364	-0.732017
	HIS-276	-1.958	0.0196	-2.0162	0.0295	-2.0754	0.045	-1.6672	0.0233	-2.132	0.0233	-1.96976		-0.0063	0.0737	0.4767	0.076	0.1157	0.0656	0.282	0.0668	0.4456	0.0608	0.26274		-0.0372	0.0115	-0.0202	0.0093	-0.0426	0.0096	-0.0366	0.0099	-0.0541	0.0112	-0.03814		-2.0019	0.0785	-1.5584	0.0798	-2.0013	0.0738	-1.4199	0.0723	-1.7399	0.0641	-1.45357
	TYR-277	0.0106	0.0114	0.0375	0.0113	-0.0544	0.0127	-0.0422	0.0103	-0.0354	0.012	-0.01678		-0.109	0.0332	0.2032	0.0386	0.0937	0.0413	-0.0325	0.0409	0.1258	0.0412	0.05624		0.0174	0.0064	0.0084	0.0062	-0.0169	0.0088	0.0218	0.0068	0.0035	0.0061	0.00684		-0.0804	0.0354	0.2489	0.0405	0.0193	0.042	-0.0534	0.0442	0.0922	0.041	0.0377667
	ILE-278	0.0111	0.0072	0.072	0.0081	0.1919	0.0072	0.2079	0.0057	0.1376	0.0083	0.1241		-0.1081	0.003	-0.1366	0.0031	-0.2049	0.0044	-0.1431	0.0034	-0.1844	0.0045	-0.15542		-0.0063	0.0191	-0.0272	0.0187	-0.0806	0.0187	-0.052	0.0209	-0.0639	0.0191	-0.046		-0.1038	0.0209	-0.0929	0.0195	-0.0939	0.0197	0.0121	0.0217	-0.1108	0.0203	-0.0648833
	GLY-279	0.1876	0.0061	0.2536	0.0061	0.3458	0.0057	0.3599	0.0047	0.3056	0.0059	0.2905		-0.0505	0.0053	-0.0647	0.0045	-0.0952	0.0044	-0.0338	0.0071	-0.1067	0.0045	-0.07018		-0.0093	0.0056	0.0093	0.0072	-0.0047	0.0064	0.0147	0.0064	-0.0057	0.0075	0.00086		0.1281	0.01	0.1976	0.0109	0.2466	0.0091	0.3405	0.0101	0.1932	0.0102	0.184333
	ASP-280	-29.3521	0.1604	-28.9663	0.1502	-27.778	0.1665	-26.052	0.1336	-28.9658	0.146	-28.2228		-0.6063	0.1055	-0.4619	0.0889	-0.1151	0.1128	-0.9706	0.1139	0.1178	0.0958	-0.40722		0.0252	0.0087	-0.0116	0.0079	-0.0023	0.0097	-0.0155	0.0111	0.0244	0.0083	0.00404		-29.9352	0.1676	-29.432	0.1585	-27.893	0.1995	-27.048	0.1482	-28.8323	0.1671	-23.8568
	LEU-281	0.1324	0.0083	0.2317	0.0083	0.3554	0.0069	0.3405	0.0056	0.3475	0.0082	0.2815		-0.0749	0.0051	-0.1157	0.006	-0.1262	0.0048	-0.0684	0.0039	-0.1863	0.0051	-0.1143		0.048	0.0247	0.1036	0.0234	0.0699	0.0281	0.0753	0.0278	0.1509	0.0269	0.08954		0.1059	0.0265	0.2194	0.0256	0.3001	0.0296	0.3476	0.0282	0.3122	0.0269	0.2142
	VAL-282	0.2828	0.0048	0.3324	0.0041	0.3893	0.0046	0.3301	0.0037	0.3772	0.0044	0.34236		-0.0139	0.0029	-0.0243	0.003	-0.0338	0.0032	0.0126	0.0031	-0.0675	0.0028	-0.02538		0.0133	0.0134	0.0113	0.0137	-0.0168	0.0168	0.0068	0.0131	-0.0512	0.0167	-0.00732		0.2825	0.0138	0.3201	0.0144	0.3394	0.0172	0.3495	0.0146	0.2589	0.0174	0.2584
	GLN-283	0.5911	0.034	0.4473	0.0371	0.5259	0.0373	0.3597	0.0252	0.6847	0.0286	0.52174		-0.2347	0.0876	0.2117	0.0873	-0.0987	0.0807	0.0605	0.0791	0.2419	0.0744	0.03614		0.0461	0.0127	0.0021	0.0108	0.0014	0.0116	-0.0088	0.0129	0.0135	0.0132	0.01086		0.4063	0.0975	0.6651	0.1004	0.4291	0.0946	0.4135	0.084	0.9342	0.0802	0.4747
	ARG-284	29.2169	0.1749	28.5261	0.1671	25.2359	0.1842	23.4023	0.1412	27.6036	0.1528	26.797		0.644	0.083	1.1524	0.0785	0.6962	0.09	1.6491	0.0827	0.9319	0.083	1.01472		-0.0086	0.018	-0.0419	0.0162	-0.0372	0.0175	-0.0637	0.0191	-0.0412	0.0177	-0.03852		29.8467	0.1646	29.6356	0.163	25.8914	0.1862	24.9959	0.1453	28.496	0.1651	23.1443
	THR-285	-0.1252	0.0078	-0.0421	0.0081	0.0155	0.0086	0.075	0.0068	0.0606	0.0079	-0.00324		-0.0346	0.0373	0.2237	0.0324	0.0146	0.0359	-0.0624	0.0333	0.0458	0.0331	0.03742		-0.0122	0.013	-0.0191	0.0133	-0.0283	0.0151	-0.0181	0.0134	-0.0393	0.0143	-0.0234		-0.1743	0.04	0.1641	0.0357	-0.0007	0.0407	-0.0033	0.0345	0.0664	0.0371	0.0087
	GLU-286	-20.5643	0.1633	-18.6299	0.1443	-17.8628	0.1243	-16.9406	0.1451	-16.8861	0.1542	-18.1767		-1.7741	0.1664	-0.3811	0.1646	-1.3238	0.1612	-2.2928	0.1827	-1.2711	0.1837	-1.40858		-0.0136	0.016	0.0146	0.0215	-0.0602	0.0208	-0.0291	0.0174	-0.0179	0.0187	-0.02124		-22.3509	0.1982	-19.0041	0.2138	-19.2499	0.2011	-19.2696	0.2364	-18.1748	0.2282	-16.3416
	VAL-287	-0.0192	0.0087	0.0952	0.0103	0.2039	0.0101	0.2949	0.0099	0.2491	0.0119	0.16478		-0.3169	0.0259	-0.2369	0.0153	-0.1594	0.0131	-0.2653	0.0257	-0.2698	0.027	-0.24966		-0.0181	0.009	-0.021	0.0097	-0.0081	0.0131	-0.0087	0.0101	-0.0307	0.0112	-0.01732		-0.356	0.0279	-0.1617	0.0206	0.0362	0.0206	0.0204	0.0289	-0.0505	0.0316	-0.0852667
	GLU-288	-24.2624	0.1395	-23.0199	0.1467	-20.8412	0.1351	-19.7248	0.1085	-22.0198	0.1344	-21.9736		-1.4468	0.1453	-0.1209	0.174	-0.9997	0.1597	-1.0872	0.1665	-0.5864	0.1657	-0.8482		-0.0064	0.0117	-0.0231	0.0121	-0.0461	0.0139	-0.0263	0.0136	-0.0321	0.013	-0.0268		-25.7236	0.184	-23.1591	0.2148	-21.8843	0.1819	-20.84	0.1882	-22.6432	0.2114	-19.0417
	LEU-289	-0.2915	0.0151	-0.2948	0.0205	-0.0281	0.0207	0.1595	0.0171	-0.0871	0.0193	-0.1084		-0.4299	0.0124	-0.5046	0.0129	-0.3154	0.0148	-0.4259	0.0148	-0.5529	0.0146	-0.44574		-0.056	0.0203	-0.0035	0.0199	-0.0113	0.0228	-0.0129	0.0201	0.0287	0.0189	-0.011		-0.7766	0.0258	-0.8031	0.0269	-0.3535	0.0263	-0.2793	0.0231	-0.6093	0.0264	-0.4703
	LEU-290	0.389	0.0183	0.5821	0.0184	0.7077	0.0182	0.8486	0.0205	0.7723	0.0238	0.65994		-0.2803	0.0296	-0.1217	0.0328	-0.0916	0.028	-0.0384	0.0304	-0.125	0.0291	-0.1314		-0.0347	0.0217	-0.0219	0.0185	0.001	0.0208	-0.0651	0.0225	-0.0416	0.0238	-0.03246		0.0751	0.0417	0.4379	0.0437	0.6169	0.038	0.745	0.0365	0.606	0.048	0.413483
	LYS-291	22.7273	0.1848	21.2148	0.205	19.2793	0.179	18.054	0.1858	20.3828	0.1908	20.3316		0.1809	0.1615	1.1019	0.1757	0.0644	0.1845	0.355	0.175	0.8303	0.1701	0.5065		-0.0379	0.015	-0.0379	0.016	-0.0481	0.0184	-0.0192	0.0145	-0.0454	0.0175	-0.0377		22.87	0.2428	22.2828	0.2789	19.2904	0.2348	18.3897	0.2482	21.1641	0.2473	17.3328
	THR-292	0.1398	0.0265	0.3631	0.0291	0.5637	0.0331	0.6652	0.0272	0.3167	0.0411	0.4097		-0.263	0.0497	-0.4253	0.047	-0.2484	0.0411	-0.1698	0.0423	-0.171	0.0534	-0.2555		0.0347	0.0099	0.0008	0.0091	-0.0045	0.0102	-0.0246	0.0092	-0.0172	0.0095	-0.00216		-0.0885	0.0493	-0.0594	0.0544	0.3113	0.051	0.4728	0.046	0.1271	0.0527	0.127217
	PRO-293	-7.0503	0.0575	-7.429	0.087	-3.2812	0.06	-3.4947	0.0663	-8.9102	0.0637	-6.03308		3.5694	0.0405	2.9474	0.0434	1.0094	0.0363	1.164	0.0468	4.2578	0.0383	2.5896		-0.2563	0.0094	-0.3268	0.0137	0.0116	0.007	-0.0057	0.0063	-0.3925	0.0109	-0.19394		-3.7352	0.0588	-4.8037	0.0882	-2.2612	0.0339	-2.3344	0.0316	-5.0449	0.0641	-3.0299
	ASN-294	-33.4768	0.3022	-27.1445	0.5526	-16.5345	0.3464	-14.1934	0.3373	-28.1781	0.2743	-23.9055		41.0564	0.2797	41.4213	0.608	18.327	0.3424	15.6956	0.3701	32.7509	0.3684	29.8502		-2.2398	0.0197	-2.2013	0.0264	-1.4831	0.0188	-1.3775	0.0191	-1.9434	0.021	-1.84902		5.3367	0.2958	12.1039	0.3245	0.3101	0.2404	0.1319	0.2216	2.6226	0.3089	3.41753
	LEU-295	-2.7386	0.0697	-1.2823	0.0742	-0.7202	0.0451	-0.6127	0.0488	-4.9809	0.0874	-2.06694		0.839	0.0613	0.8205	0.0783	0.6661	0.0544	0.7945	0.0523	3.5733	0.099	1.33868		-0.0856	0.0211	-0.0559	0.0222	-0.0409	0.0236	-0.0362	0.021	-0.1956	0.0239	-0.08284		-1.9861	0.0685	-0.5154	0.0715	-0.0952	0.0531	0.1421	0.059	-1.6058	0.0634	-0.676733
	GLY-296	-2.9122	0.0621	-2.8355	0.0586	-2.7349	0.0605	-2.7446	0.0608	-5.8098	0.0814	-3.4074		0.2901	0.046	0.373	0.0595	0.7644	0.0688	0.7989	0.0757	2.281	0.0587	0.90148		-0.0915	0.009	-0.0978	0.009	-0.1305	0.0091	-0.1393	0.0093	-0.2775	0.0089	-0.14732		-2.7185	0.0568	-2.5627	0.0602	-2.1024	0.051	-2.0852	0.049	-3.8066	0.0768	-2.21257
	LYS-297	16.8043	0.3931	9.264	0.4717	6.0557	0.4508	10.0743	0.4319	5.6213	0.3998	9.56392		0.1009	0.3417	2.3743	0.4521	4.9402	0.4608	3.5456	0.2767	7.5128	0.2976	3.69476		-0.1139	0.0185	-0.1532	0.019	-0.2153	0.0201	-0.0761	0.0179	-0.3122	0.0198	-0.17414		16.8119	0.3522	11.4713	0.3826	10.7725	0.3524	13.5145	0.4235	12.8006	0.3799	10.8951
	LYS-298	1.8272	0.7698	-9.4631	0.644	-8.8507	0.4675	-7.5752	0.5024	-7.8786	0.5776	-6.38808		22.4206	1.0768	30.3142	1.0512	35.2387	0.7348	37.3755	0.8338	30.2663	0.8339	31.1231		-1.3701	0.0295	-1.6057	0.0243	-1.6471	0.0224	-1.6311	0.0207	-1.3304	0.0177	-1.51688		22.914	0.5845	19.2097	0.5707	24.7516	0.5046	28.1755	0.6246	21.0584	0.5961	19.3515
	SER-299	-7.9892	0.1474	-9.282	0.2249	-9.616	0.2096	-9.2783	0.1832	-10.5524	0.1908	-9.34358		6.905	0.1542	9.9231	0.2302	10.9685	0.2149	10.8649	0.2204	9.1643	0.1902	9.56516		-0.3055	0.0106	-0.3253	0.0103	-0.3023	0.0124	-0.2309	0.0092	-0.3244	0.0104	-0.29768		-1.3854	0.176	0.3111	0.1679	1.0407	0.1242	1.3689	0.152	-1.7221	0.1539	-0.0644667
	LEU-300	-1.1457	0.0254	-1.6908	0.027	-2.1432	0.0295	-2.0141	0.0262	-2.3962	0.0264	-1.878		0.9112	0.0266	1.3561	0.0285	1.7163	0.0293	1.8296	0.0267	2.0379	0.0228	1.57022		-0.0382	0.0214	0.0114	0.0209	-0.0475	0.0197	-0.033	0.0222	-0.0109	0.0239	-0.02364		-0.2722	0.0265	-0.3232	0.03	-0.476	0.0291	-0.2168	0.0308	-0.3684	0.033	-0.2761
	THR-301	-0.613	0.0243	-0.9212	0.0269	-1.027	0.0291	-1.0152	0.0295	-1.1995	0.032	-0.95518		0.2155	0.0582	0.4908	0.0575	0.5448	0.0638	0.619	0.0529	1.1204	0.0702	0.5981		-0.0042	0.0119	-0.0078	0.0092	-0.0278	0.011	-0.0166	0.012	0.0054	0.012	-0.0102		-0.4013	0.0569	-0.44	0.0523	-0.5098	0.0523	-0.4107	0.0463	-0.073	0.0625	-0.3058
	GLU-302	-28.8573	0.434	-24.5572	0.4155	-26.5861	0.3035	-29.0063	0.2959	-26.2235	0.3005	-27.0461		-3.1159	0.2505	-2.2868	0.2365	-2.6859	0.2052	-3.8773	0.1706	-4.2915	0.2798	-3.25148		0.0198	0.0085	-0.0132	0.0079	-0.0157	0.0111	-0.0028	0.0074	-0.0135	0.0091	-0.00508		-31.9693	0.3564	-26.8442	0.3728	-29.2848	0.3118	-32.8951	0.2661	-30.5265	0.3252	-25.2533
	ILE-303	-0.26	0.0146	-0.4478	0.0151	-0.5166	0.0131	-0.5924	0.0129	-0.5619	0.0147	-0.47574		0.3589	0.0134	0.5075	0.0132	0.5771	0.0144	0.7118	0.0127	0.6718	0.0131	0.56542		-0.0113	0.0278	0.0147	0.0249	0.0412	0.0234	0.0486	0.0278	0.0363	0.0268	0.0259		0.0867	0.0304	0.0726	0.0289	0.1012	0.0263	0.1688	0.0299	0.1458	0.0313	0.09585
	LYS-304	20.1339	0.1652	17.2248	0.1585	17.1321	0.1447	17.3929	0.1443	16.438	0.1502	17.6643		0.3056	0.1601	1.5184	0.1722	1.5263	0.1609	1.9435	0.1637	1.8853	0.1632	1.43582		0.0087	0.023	0.0071	0.0189	-0.0104	0.0201	-0.026	0.0178	-0.0008	0.0177	-0.00428		20.4452	0.2039	18.7507	0.2243	18.6448	0.2166	19.3043	0.2119	18.3175	0.2139	15.9104
	ASP-305	-19.6994	0.2138	-16.97	0.2204	-18.5956	0.19	-19.2985	0.1591	-17.4375	0.1782	-18.4002		-0.9522	0.1813	1.3503	0.1952	-0.3243	0.1947	-0.2986	0.2009	0.549	0.1936	0.06484		0.0113	0.0095	-0.013	0.0099	0.0181	0.0103	0.0038	0.0111	0.0192	0.0103	0.00788		-20.6362	0.2754	-15.6254	0.2839	-18.9043	0.2852	-19.5876	0.2631	-16.8661	0.2567	-15.2699
	VAL-306	0.4216	0.0121	0.3301	0.0103	0.372	0.0101	0.2416	0.0108	0.371	0.0095	0.34726		0.1145	0.0103	0.1464	0.0108	0.1609	0.0111	0.3288	0.0134	0.1927	0.0113	0.18866		0.0368	0.0188	0.0396	0.0177	0.023	0.0202	0.0498	0.0221	0.0757	0.0183	0.04498		0.5733	0.0212	0.5171	0.0222	0.5569	0.0241	0.6204	0.0271	0.6397	0.0222	0.484567
	LEU-307	0.3085	0.0073	0.2155	0.0074	0.2352	0.0076	0.1822	0.0066	0.2165	0.007	0.23158		0.1227	0.0062	0.1295	0.0064	0.166	0.0079	0.2199	0.0054	0.1778	0.0077	0.16318		-0.0148	0.0175	0.0298	0.0179	0.0158	0.02	0.0386	0.018	0.0416	0.0183	0.0222		0.4146	0.0186	0.3754	0.0194	0.4166	0.0211	0.4406	0.0192	0.4361	0.0194	0.347217
	ALA-308	0.3315	0.0069	0.2166	0.0078	0.2707	0.0073	0.2754	0.0065	0.2326	0.0061	0.26536		0.0355	0.0221	0.18	0.0281	0.1437	0.0283	0.159	0.0294	0.2215	0.0266	0.14794		-0.0024	0.0061	-0.0069	0.0058	-0.0019	0.0056	0.0092	0.0052	0.0049	0.0059	0.00058		0.3641	0.0241	0.3911	0.0294	0.412	0.0293	0.4449	0.0288	0.4588	0.0261	0.34515
	SER-309	0.4664	0.0177	0.3209	0.0158	0.4464	0.0162	0.4814	0.0173	0.493	0.016	0.44162		-0.2227	0.0694	0.2918	0.0659	-0.218	0.0671	0.0389	0.0765	0.2138	0.0836	0.02076		-0.007	0.0074	0.0054	0.0077	-0.0111	0.007	0.008	0.0087	-0.0102	0.0067	-0.00298		0.2387	0.0713	0.6162	0.0703	0.2176	0.0711	0.5238	0.082	0.6966	0.0862	0.38215
	ARG-310	18.4665	0.1755	16.5106	0.2133	16.6979	0.1884	19.2168	0.181	16.9597	0.1888	17.5703		0.0016	0.0828	-0.2214	0.0803	-0.5298	0.0809	0.4314	0.0785	-0.3325	0.0762	-0.13014		0.0275	0.0207	0.0417	0.0194	0.0112	0.0163	0.0072	0.0186	0.0393	0.0191	0.02538		18.4925	0.1782	16.3271	0.2307	16.1697	0.2008	19.654	0.1976	16.6574	0.2007	14.5501
	GLY-311	0.0957	0.0063	0.023	0.0066	0.0854	0.0058	0.0973	0.0054	0.0505	0.0059	0.07038		-0.1528	0.0298	-0.0218	0.0333	-0.0605	0.0287	-0.0103	0.0322	-0.0537	0.0321	-0.05982		0.0021	0.0061	-0.0045	0.0059	0.0075	0.0063	-0.0107	0.0066	0.004	0.0052	-0.00032		-0.0565	0.0321	-0.0032	0.036	0.0325	0.0307	0.0763	0.0336	-0.0009	0.0311	0.00803333
	LEU-312	0.014	0.0057	0.0626	0.0056	0.025	0.0052	0.0408	0.0049	0.0611	0.0059	0.0407		-0.2096	0.0252	-0.1059	0.0218	-0.1516	0.0214	-0.16	0.0198	-0.103	0.0242	-0.14602		-0.0225	0.0194	-0.0453	0.0214	-0.0364	0.024	-0.0525	0.0186	-0.0925	0.0252	-0.04984		-0.2172	0.0326	-0.0882	0.032	-0.1632	0.0328	-0.1707	0.0272	-0.1347	0.0341	-0.129
	SER-313	-0.1041	0.0082	-0.1272	0.0073	-0.1035	0.0072	-0.0945	0.0061	-0.125	0.0058	-0.11086		-0.1077	0.0658	0.3499	0.0717	-0.0447	0.0705	0.0226	0.0768	0.2492	0.0897	0.09386		0.0087	0.0111	-0.0093	0.0102	0.0235	0.0118	-0.0018	0.0119	-0.0043	0.0099	0.00336		-0.1997	0.0687	0.2121	0.0709	-0.1245	0.0711	-0.0759	0.0765	0.1205	0.0891	-0.01125
	LEU-314	0.1227	0.0039	0.079	0.0035	0.0736	0.0032	0.0569	0.003	0.0674	0.0032	0.07992		-0.2255	0.0423	-0.0159	0.0417	-0.2445	0.0377	-0.129	0.0398	-0.0563	0.0331	-0.13424		-0.0133	0.0223	0.0789	0.0239	0.1152	0.0231	0.0453	0.022	0.0375	0.0184	0.05272		-0.1175	0.0465	0.144	0.051	-0.0559	0.046	-0.0282	0.0427	0.0479	0.0379	-0.00161667
	GLY-315	0.2844	0.0055	0.2457	0.0058	0.23	0.0063	0.1819	0.0046	0.2316	0.0068	0.23472		0.0157	0.0358	0.2455	0.038	0.1305	0.0325	0.2264	0.0327	0.2117	0.0353	0.16596		-0.0057	0.0103	-0.0049	0.0105	0.0036	0.0094	-0.007	0.0097	-0.0031	0.0092	-0.00342		0.2965	0.0363	0.4861	0.0375	0.3631	0.0339	0.4003	0.034	0.4409	0.0364	0.33115
	MET-316	-0.0609	0.0102	-0.1279	0.009	-0.0977	0.0081	-0.111	0.0067	-0.0739	0.0112	-0.09428		0.0804	0.0322	0.1673	0.027	0.1677	0.0301	0.0743	0.0228	0.149	0.027	0.12774		-0.023	0.0177	0.0134	0.0152	-0.0132	0.0182	-0.0426	0.0165	-0.0094	0.0172	-0.01496		-0.003	0.0397	0.052	0.0331	0.0571	0.0367	-0.08	0.0296	0.0663	0.0337	0.0154
	ARG-317	20.7943	0.1203	20.8685	0.1086	19.3768	0.1225	19.3552	0.0937	20.9908	0.1094	20.2771		-0.3963	0.1082	0.5477	0.0968	-0.0326	0.1009	0.3105	0.1046	0.4478	0.1156	0.17542		0.0278	0.0102	0.0096	0.0089	0.0093	0.0099	0.0363	0.012	0.0174	0.0136	0.02008		20.4281	0.1789	21.4276	0.1473	19.3448	0.1785	19.7091	0.1452	21.4451	0.174	17.0591
	LEU-318	-0.0402	0.0061	-0.0983	0.005	-0.0407	0.0052	-0.0825	0.0054	-0.0711	0.0052	-0.06656		0.1782	0.0373	0.2695	0.0388	0.2383	0.0355	0.2	0.0296	0.3196	0.0359	0.24112		0.0323	0.0165	-0.0037	0.0131	0.028	0.0176	-0.0232	0.0192	0.0245	0.0146	0.01158		0.1705	0.0401	0.168	0.0412	0.2252	0.0388	0.0928	0.036	0.2725	0.039	0.154833
	GLU-319	-19.5295	0.0871	-19.3568	0.0824	-18.9054	0.0934	-18.396	0.0676	-19.5619	0.0979	-19.1499		-0.2401	0.2038	1.4937	0.1956	0.2164	0.1878	0.3729	0.1701	0.8644	0.1932	0.54146		0.0073	0.0063	-0.0053	0.006	0.0037	0.0075	0.0197	0.0123	0.0168	0.0073	0.00844		-19.7568	0.2074	-17.8652	0.2212	-18.685	0.2068	-18.0112	0.1832	-18.6755	0.2078	-15.499
	ASN-320	0.3865	0.0281	0.5522	0.0267	0.2658	0.0313	0.2725	0.0242	0.4261	0.0318	0.38062		-0.5704	0.1056	0.143	0.0997	-0.4851	0.1073	-0.2663	0.1051	0.0628	0.1147	-0.2232		0.0019	0.0074	0.0035	0.0082	-0.0092	0.009	0.009	0.014	-0.0026	0.0086	0.00052		-0.1804	0.1091	0.7011	0.0996	-0.231	0.1084	0.0111	0.1072	0.4879	0.1137	0.13145
	TRP-321	0.4373	0.0068	0.4445	0.0075	0.3855	0.0098	0.2978	0.0073	0.4194	0.0075	0.3969		-0.0475	0.0539	-0.0562	0.0398	0.1251	0.0484	0.0835	0.0493	-0.0265	0.05	0.01568		-0.009	0.011	0.0008	0.0126	0.0072	0.0108	-0.0022	0.0118	-0.0157	0.0112	-0.00378		0.3847	0.0537	0.3894	0.0444	0.5197	0.0536	0.3774	0.0493	0.3778	0.0492	0.3415
	PRO-322	-0.1175	0.0063	-0.0626	0.0066	-0.0885	0.0061	-0.1679	0.0045	-0.0647	0.0062	-0.10024		0.1515	0.022	0.0762	0.0199	0.1661	0.0172	0.0634	0.0154	0.1587	0.0193	0.12318		0.0176	0.0102	0.0061	0.0078	0.0151	0.0116	-0.0119	0.0153	-0.0006	0.0118	0.00526		0.052	0.0237	0.0214	0.0225	0.0926	0.0192	-0.1155	0.0208	0.0955	0.0237	0.0243333
	PRO-323	0.4123	0.0049	0.4265	0.0059	0.4061	0.0072	0.3132	0.0054	0.4183	0.0063	0.39528		-0.1316	0.0324	-0.0317	0.0341	-0.0771	0.035	0.0098	0.0314	-0.0053	0.0307	-0.04718		0.0041	0.0051	0.0084	0.0052	0.0068	0.006	0.0244	0.0055	0.0073	0.0056	0.0102		0.2867	0.033	0.4023	0.0333	0.3339	0.0365	0.3485	0.0328	0.4202	0.0312	0.2986
	ALA-324	-0.1928	0.0064	-0.1778	0.0076	-0.1498	0.0088	-0.1136	0.0053	-0.1645	0.0075	-0.1597		0.0722	0.0131	0.0415	0.0136	0.1402	0.0111	0.0683	0.0104	0.0967	0.0103	0.08378		-0.0177	0.0132	0.0076	0.0127	-0.0342	0.0128	0.0278	0.0148	0.0305	0.0132	0.0028		-0.1397	0.0207	-0.1287	0.0224	-0.043	0.0213	-0.0166	0.0181	-0.0376	0.0204	-0.0609333
	SER-325	0.4209	0.0187	0.4198	0.0204	0.3849	0.0317	0.1385	0.0201	0.4553	0.0286	0.36388		0.1479	0.0817	0.6749	0.077	0.3268	0.0787	0.3506	0.0775	0.5368	0.0908	0.4074		-0.007	0.0052	-0.0005	0.0056	0.0033	0.0055	0.0008	0.0056	0.0109	0.0059	0.0015		0.5656	0.0834	1.0933	0.0806	0.7138	0.0864	0.4922	0.0799	0.997	0.0937	0.64365
	ILE-326	-0.598	0.0167	-0.6226	0.0259	-0.3907	0.0384	-0.8741	0.018	-0.6254	0.0329	-0.62216		0.2353	0.0403	0.4234	0.0431	0.0703	0.0444	0.3422	0.0424	0.2485	0.0446	0.26394		0.0279	0.0173	-0.0536	0.0158	-0.0794	0.0182	0.0774	0.0141	-0.1209	0.0175	-0.02972		-0.3349	0.0438	-0.2525	0.0465	-0.4001	0.0457	-0.4561	0.0485	-0.4958	0.0535	-0.323233
	ALA-327	-0.4183	0.0288	-0.5128	0.0364	-0.2925	0.0438	-1.0304	0.0256	-0.2305	0.0407	-0.4969		-0.0956	0.0392	0.213	0.0421	-0.3927	0.0429	0.1483	0.0326	-0.255	0.043	-0.0764		0.0004	0.005	-0.0048	0.0062	-0.0146	0.0061	-0.0046	0.0052	-0.0124	0.0059	-0.0072		-0.5134	0.0409	-0.3057	0.0449	-0.7	0.0528	-0.8846	0.0389	-0.4947	0.0504	-0.483067
	ASP-328	-76.2041	1.1063	-54.6721	0.9309	-92.6171	0.9629	-70.7861	0.4833	-90.83	0.6819	-77.0219		57.6616	1.8049	32.7767	1.2236	81.3947	1.3026	39.1962	0.7146	80.2968	1.0687	58.2652		-0.3187	0.0166	-0.1568	0.0182	-0.6167	0.0159	-0.1336	0.0205	-0.5858	0.0134	-0.36232		-18.8348	0.8011	-22.1067	0.5609	-11.8711	0.5489	-31.7523	0.4747	-11.1517	0.6291	-15.9528
	GLU-329	-137.086	1.5236	-160.764	0.8864	-174.615	1.3282	-144.778	0.8462	-158.396	0.877	-155.128		40.1939	2.6762	102.375	1.3974	68.8303	1.4387	22.2576	0.8102	70.5928	1.0477	60.85		-0.4288	0.0276	-0.8729	0.0171	-0.5214	0.0147	-0.22	0.0126	-0.6136	0.0175	-0.53134		-97.2167	1.5306	-59.2043	1.0205	-106.262	0.7911	-122.712	0.8541	-88.4014	0.9054	-78.9661

## Sheet: TPR3
Protein	#Residues	MM_Energy(+/-)dev/error												Polar_Energy(+/-)dev/error												Apolar_Energy(+/-)dev/error												Total_Energy(+/-)dev/error
		Frame1		Frame2		Frame3		Frame4		Frame5		Med		Frame1		Frame2		Frame3		Frame4		Frame5		Med		Frame1		Frame2		Frame3		Frame4		Frame5		Med		Frame1		Frame2		Frame3		Frame4		Frame5		Med
InvF	MET-1	-23.4108	0.1176	-21.9307	0.1837	-28.2321	0.1821	-27.9765	0.2196	-30.3584	0.207	-26.3817		1.0465	0.1163	0.3591	0.0983	0.0166	0.111	-0.223	0.1084	-0.4909	0.1244	0.14166		-0.0025	0.0094	-0.0121	0.0072	-0.0057	0.0086	-0.0041	0.0084	0.001	0.0061	-0.00468		-22.3704	0.16	-21.5749	0.2117	-28.2203	0.218	-28.2162	0.2442	-30.846	0.2345	-26.2456
	LEU-2	0.1702	0.0049	0.2059	0.0037	0.295	0.0062	0.2948	0.0169	0.0478	0.0075	0.20274		0.0525	0.0228	0.0566	0.0146	-0.0196	0.018	-0.0434	0.02	0.0623	0.0361	0.02168		0.0151	0.0075	-0.0012	0.0057	0.0083	0.0081	0.0287	0.0091	0.0069	0.0102	0.01156		0.2384	0.0251	0.2617	0.0166	0.2828	0.0219	0.2806	0.0273	0.1177	0.0383	0.23624
	ASN-3	0.1434	0.016	0.0348	0.0266	-0.1093	0.0277	-0.0746	0.0457	0.3045	0.0234	0.05976		0.5878	0.0482	0.3823	0.0629	-0.0525	0.0641	-0.1437	0.0434	-0.1999	0.0715	0.1148		0.0071	0.0058	-0.0032	0.0056	0.008	0.0042	0.0061	0.0064	0.0002	0.0089	0.00364		0.737	0.0516	0.4138	0.0665	-0.1526	0.0758	-0.2123	0.0623	0.1027	0.0725	0.17772
	THR-4	-0.1889	0.0085	-0.2456	0.0088	-0.3939	0.0112	-0.4874	0.0142	-0.1144	0.0092	-0.28604		-0.0454	0.0221	0.0243	0.02	-0.0112	0.0195	-0.0172	0.0192	0.0558	0.0206	0.00126		0.0017	0.0066	-0.0026	0.0077	-0.0034	0.0071	-0.0008	0.0056	-0.0215	0.0091	-0.00532		-0.2318	0.0243	-0.224	0.0232	-0.4085	0.0234	-0.5045	0.0247	-0.0796	0.0234	-0.28968
	GLN-5	-0.2081	0.0205	-0.3706	0.0205	-0.7943	0.0183	-0.4207	0.0383	-0.7086	0.0196	-0.50046		0.8805	0.0715	0.547	0.071	0.2165	0.068	-0.2103	0.05	-0.1176	0.0584	0.26322		-0.0003	0.0078	-0.008	0.0101	0.0199	0.009	0.0014	0.0063	-0.0074	0.0158	0.00112		0.6767	0.0725	0.1706	0.0766	-0.5579	0.067	-0.6301	0.0621	-0.8318	0.0641	-0.2345
	GLU-6	18.6406	0.0581	18.3065	0.1437	22.549	0.1338	25.5102	0.1369	23.6772	0.1192	21.7367		0.6833	0.113	0.2855	0.0931	0.0647	0.1074	-0.1799	0.0835	-0.3304	0.1241	0.10464		0.0133	0.0068	-0.0067	0.0059	0.0037	0.0077	-0.0085	0.0052	-0.0066	0.0064	-0.00096		19.3331	0.1298	18.589	0.1742	22.6219	0.1709	25.3167	0.1519	23.345	0.172	21.8411
	VAL-7	0.051	0.0026	0.029	0.0026	0.2493	0.0044	0.2404	0.0043	0.3155	0.004	0.17704		0.2573	0.0318	0.14	0.0334	0.0253	0.0141	-0.0529	0.0176	-0.0473	0.0191	0.06448		-0.0018	0.0078	-0.0031	0.0074	0.0065	0.0062	0.0023	0.0054	-0.0142	0.015	-0.00206		0.3087	0.0319	0.1675	0.0342	0.2805	0.0151	0.1888	0.0183	0.2536	0.024	0.23982
	LEU-8	-0.1419	0.0086	-0.2158	0.0039	-0.2088	0.0053	0.0797	0.0102	0.1423	0.0051	-0.0689		0.1558	0.0223	0.1407	0.0297	0.027	0.0213	-0.0074	0.003	0	0.0033	0.06322		-0.0085	0.0058	-0.0007	0.0027	-0.0048	0.0093	-0.0186	0.0103	0.0193	0.0119	-0.00266		0.0064	0.0239	-0.0762	0.0299	-0.1873	0.023	0.0542	0.0142	0.1623	0.0123	-0.00812
	LYS-9	-19.8988	0.085	-17.4097	0.1153	-21.8204	0.1188	-22.5366	0.094	-21.4419	0.0947	-20.6215		0.7074	0.1059	0.4648	0.1208	0.0861	0.1029	-0.2688	0.0992	-0.3652	0.1161	0.12486		0.0068	0.0059	0.0036	0.0062	-0.0001	0.0065	-0.0085	0.0054	-0.0103	0.0098	-0.0017		-19.1814	0.1238	-16.9423	0.1657	-21.7303	0.1529	-22.8119	0.1376	-21.8254	0.1428	-20.4983
	GLU-10	24.3043	0.0985	20.6406	0.1358	23.2048	0.1118	24.1504	0.1181	22.7893	0.1099	23.0179		0.8831	0.1109	0.751	0.1176	0.2757	0.1021	-0.4374	0.1007	-0.3247	0.1138	0.22954		-0.0062	0.0067	-0.0098	0.0075	0.0065	0.0055	0.0012	0.0058	-0.0191	0.0132	-0.00548		25.1774	0.1427	21.383	0.1768	23.4931	0.1496	23.7141	0.1556	22.4433	0.1508	23.2422
	GLY-11	0.3537	0.0086	0.2608	0.0068	0.3528	0.0069	0.1182	0.0069	0.1288	0.0071	0.24286		-0.0278	0.0148	-0.0313	0.0089	0.0127	0.0212	-0.0416	0.0162	-0.0323	0.0206	-0.02406		-0.0147	0.0054	-0.0046	0.0045	0.0014	0.0035	0.0071	0.0042	-0.0085	0.0075	-0.00386		0.3112	0.0191	0.2242	0.0116	0.3656	0.0225	0.0834	0.0182	0.0873	0.0229	0.21434
	GLU-12	25.253	0.093	22.0043	0.1554	27.7236	0.1605	32.2844	0.2103	29.1247	0.1575	27.278		0.8622	0.1031	0.0964	0.0693	0.0441	0.0945	-0.4106	0.0835	0.0075	0.1366	0.11992		0.0131	0.0069	-0.0002	0.0049	-0.0063	0.0057	-0.0117	0.0058	0.0037	0.0067	-0.00028		26.1207	0.147	22.1039	0.1569	27.7521	0.1866	31.8592	0.2357	29.1352	0.211	27.3942
	LYS-13	-33.4531	0.1341	-27.7329	0.2115	-33.991	0.2304	-34.7578	0.2417	-33.1945	0.2119	-32.6259		0.833	0.0994	0.3832	0.1009	0.0287	0.0966	-0.1223	0.0797	-0.2418	0.1077	0.17616		0.003	0.0101	0.0041	0.0089	0.0112	0.0091	-0.0159	0.0092	-0.0179	0.0139	-0.0031		-32.6158	0.1597	-27.3444	0.2405	-33.9448	0.2391	-34.8945	0.2477	-33.4514	0.242	-32.4502
	ARG-14	-24.4662	0.1005	-21.584	0.1676	-26.5138	0.1431	-28.9672	0.146	-26.5056	0.1321	-25.6074		0.0793	0.0389	-0.0332	0.0241	-0.0517	0.021	0.069	0.0294	0.0493	0.0419	0.02254		0.0044	0.0085	0.0015	0.0057	0.0052	0.0056	0.0014	0.0088	0.0195	0.0133	0.0064		-24.3872	0.0964	-21.6121	0.1617	-26.5564	0.1475	-28.901	0.1457	-26.4439	0.1315	-25.5801
	LYS-15	-35.758	0.2873	-29.9859	0.246	-39.0944	0.2923	-40.4928	0.2952	-39.9962	0.2692	-37.0655		0.9093	0.1196	0.3151	0.1228	-0.1177	0.1088	-0.2966	0.0905	-0.164	0.1256	0.12922		-0.0002	0.0087	0.0056	0.0084	-0.0067	0.0094	0.0133	0.01	-0.0137	0.0116	-0.00034		-34.8561	0.3025	-29.6642	0.2732	-39.2356	0.3261	-40.7805	0.3005	-40.1707	0.2911	-36.9414
	ILE-16	0.0067	0.0137	0.0739	0.0118	0.4986	0.0135	0.5367	0.016	0.3832	0.0108	0.29982		0.1273	0.0209	0.0548	0.0222	-0.0121	0.0057	-0.0461	0.0058	-0.03	0.009	0.01878		0.0017	0.0098	0.0109	0.0057	0.0069	0.0087	0.0169	0.0081	0.0038	0.0087	0.00804		0.1356	0.0253	0.1394	0.026	0.4932	0.0171	0.5081	0.0191	0.357	0.0161	0.32666
	ARG-17	-43.8382	0.2337	-39.4414	0.3991	-44.2766	0.4676	-52.6977	0.3947	-41.9104	0.3405	-44.4329		0.9957	0.0636	0.8189	0.0634	0.0694	0.0666	0.3282	0.061	0.2911	0.0764	0.50066		0.0073	0.0083	-0.0186	0.0084	0.0002	0.0065	0.0044	0.0057	0.0033	0.0086	-0.00068		-42.8279	0.2207	-38.6239	0.3962	-44.2057	0.4661	-52.3429	0.3912	-41.6116	0.3244	-43.9224
	SER-18	-0.3239	0.0112	-0.2576	0.0125	-0.7313	0.0413	-0.2539	0.0217	-0.2533	0.0103	-0.364		0.0443	0.0222	0.1217	0.0324	0.0431	0.0385	-0.0013	0.0197	-0.0559	0.0251	0.03038		-0.0052	0.0038	-0.0013	0.0029	-0.0002	0.0036	0.001	0.0037	0.0093	0.0042	0.00072		-0.2843	0.0262	-0.1369	0.0338	-0.6887	0.0535	-0.2548	0.0285	-0.2986	0.027	-0.33266
	PRO-19	-0.5069	0.0073	-0.3602	0.0053	-0.4118	0.0077	-0.4576	0.0082	-0.5145	0.0076	-0.4502		0.0387	0.0117	0.0408	0.0103	0.0141	0.0099	0.0292	0.0108	0.0707	0.0131	0.0387		0.0358	0.0164	0.0047	0.0145	-0.018	0.0131	0.0053	0.0122	-0.0028	0.0171	0.005		-0.4313	0.0212	-0.3141	0.0176	-0.4157	0.0182	-0.4239	0.0176	-0.4466	0.0241	-0.40632
	GLU-20	22.274	0.0944	21.3054	0.2231	27.8726	0.1599	29.9895	0.1531	24.8839	0.1429	25.2651		0.3818	0.0749	0.1301	0.06	0.2646	0.0853	-0.0475	0.0745	-0.2379	0.0647	0.09822		-0.013	0.0069	-0.007	0.0078	0.0109	0.0089	-0.009	0.0085	0.0028	0.0089	-0.00306		22.644	0.1135	21.4222	0.2224	28.1481	0.1871	29.9297	0.1536	24.644	0.1378	25.3576
	ALA-21	-0.9228	0.0063	-0.8077	0.0073	-1.0796	0.0081	-1.1243	0.0092	-1.0195	0.0076	-0.99078		0.1173	0.0147	0.0876	0.0152	0.0861	0.0217	0.1327	0.0175	0.1425	0.0091	0.11324		-0.0152	0.0075	-0.0112	0.0072	-0.016	0.0091	-0.021	0.0084	0.0366	0.01	-0.00536		-0.8209	0.0169	-0.7316	0.017	-1.0104	0.0244	-1.0139	0.0201	-0.8408	0.0135	-0.88352
	TRP-22	0.0267	0.0096	-0.097	0.0081	-0.3587	0.0092	-0.3545	0.0109	-0.1758	0.0091	-0.19186		0.0471	0.0076	0.0479	0.006	0.06	0.0088	0.0342	0.0053	-0.0062	0.0047	0.0366		0.0016	0.0051	-0.0088	0.0049	-0.0016	0.0046	-0.0013	0.0046	-0.0061	0.0072	-0.00324		0.0754	0.0115	-0.0579	0.0114	-0.3007	0.0137	-0.3216	0.0125	-0.1879	0.0106	-0.15854
	PHE-23	-0.0117	0.006	-0.0015	0.0047	-0.0238	0.0054	-0.0412	0.0072	-0.0073	0.0053	-0.0171		-0.0232	0.008	-0.0286	0.0027	-0.0319	0.0017	-0.0217	0.0035	-0.0085	0.0016	-0.02278		-0.0027	0.0032	-0.0001	0.004	0.0088	0.0041	-0.0035	0.0034	0.0127	0.0053	0.00304		-0.0375	0.0106	-0.03	0.0066	-0.0467	0.0068	-0.0664	0.0083	-0.003	0.0071	-0.03672
	ILE-24	-0.132	0.0048	-0.1257	0.0053	-0.1961	0.006	-0.1782	0.0063	-0.1863	0.0052	-0.16366		-0.0007	0.0018	-0.0216	0.0065	-0.0014	0.0029	0.0074	0.0017	0.0198	0.0039	0.0007		0.0022	0.0092	-0.0096	0.0066	0.0016	0.0073	-0.001	0.0092	0.0037	0.01	-0.00062		-0.1305	0.0106	-0.1573	0.0105	-0.1957	0.0093	-0.1718	0.0121	-0.1624	0.0117	-0.16354
	GLN-25	-0.4983	0.0091	0.1339	0.0097	0.2037	0.0075	-0.0984	0.0107	0.1485	0.0087	-0.02212		0.0216	0.0158	0.1725	0.05	0.0047	0.0483	-0.1012	0.0387	0.0437	0.0459	0.02826		0.0024	0.0036	-0.0024	0.0021	-0.0007	0.0041	-0.0003	0.0051	-0.0125	0.009	-0.0027		-0.4739	0.02	0.3044	0.0519	0.2098	0.0481	-0.199	0.0399	0.1804	0.0475	0.00434
	THR-26	-0.1832	0.0057	-0.1918	0.0073	-0.2572	0.007	-0.2962	0.0065	-0.209	0.0057	-0.22748		0.0173	0.0127	0.0252	0.0169	0.024	0.0129	-0.0155	0.0165	0.0017	0.0117	0.01054		0.0015	0.0083	0.0123	0.0068	0.0023	0.006	0.0059	0.0066	0.0052	0.008	0.00544		-0.165	0.016	-0.1547	0.0192	-0.2301	0.0158	-0.3057	0.0163	-0.2014	0.0153	-0.21138
	CYS-27	-0.3916	0.0045	-0.295	0.0034	-0.3054	0.0086	-0.3903	0.0057	-0.355	0.0053	-0.34746		0.2555	0.0242	0.1664	0.0267	0.0205	0.0202	-0.0413	0.017	0.035	0.0229	0.08722		0.012	0.0082	0.0057	0.0082	0.0107	0.0099	0.0071	0.0069	0.0143	0.0139	0.00996		-0.124	0.0252	-0.123	0.0283	-0.2745	0.0249	-0.423	0.0196	-0.3047	0.027	-0.24984
	SER-28	0.1392	0.0059	0.0839	0.0061	0.0851	0.0092	-0.3585	0.0064	0.0643	0.0045	0.0028		0.0795	0.0189	0.2463	0.0422	-0.0212	0.034	-0.0661	0.0298	-0.0237	0.023	0.04296		0.001	0.0021	-0.0031	0.0032	-0.0015	0.0039	-0.0017	0.0018	-0.0012	0.0038	-0.0013		0.2188	0.0203	0.3248	0.0407	0.0629	0.0365	-0.4291	0.0317	0.0402	0.0232	0.04352
	ALA-29	0.1336	0.0042	0.0535	0.0038	-0.0195	0.0039	-0.19	0.0054	0.0557	0.0041	0.00666		0.1406	0.0304	0.1002	0.0301	0.0569	0.0328	-0.0363	0.0136	-0.0031	0.0349	0.05166		0.0108	0.0073	-0.0057	0.011	0.0011	0.0106	0.0192	0.0087	-0.0031	0.0055	0.00446		0.283	0.0308	0.148	0.0334	0.0387	0.0342	-0.2064	0.017	0.0498	0.0342	0.06262
	GLN-30	0.2171	0.0126	0.1082	0.0113	0.2427	0.0178	0.0346	0.012	0.1236	0.011	0.14524		0.7102	0.0562	0.2779	0.0622	0.003	0.052	-0.1947	0.0388	-0.2089	0.0674	0.1175		-0.005	0.01	0.0081	0.0066	0.0172	0.0098	-0.0034	0.0062	0.0037	0.0117	0.00412		0.9245	0.0586	0.3918	0.0658	0.2652	0.0549	-0.1654	0.041	-0.0812	0.0698	0.26698
	LYS-31	-20.8668	0.1072	-18.0756	0.1366	-20.0675	0.1044	-20.7563	0.094	-18.8456	0.0984	-19.7224		1.1982	0.1277	0.4239	0.1179	0.0425	0.1165	-0.2474	0.1132	-0.1762	0.1211	0.2482		-0.0077	0.0103	0.0195	0.0103	0.0207	0.01	-0.0076	0.0083	0.0184	0.01	0.00866		-19.6688	0.1647	-17.629	0.1918	-20.0053	0.1471	-21.0069	0.15	-19.0013	0.1495	-19.4623
	LEU-32	0.1045	0.0051	0.0815	0.0053	0.1323	0.0041	0.1031	0.0042	0.1245	0.0044	0.10918		-0.0136	0.0046	0.0081	0.0059	-0.0015	0.0033	0.0032	0.0023	-0.0204	0.0064	-0.00484		-0.0155	0.0103	-0.0022	0.0103	0.0127	0.0089	-0.0023	0.0081	-0.0132	0.0131	-0.0041		0.075	0.0126	0.0874	0.0118	0.143	0.0096	0.104	0.0098	0.091	0.0153	0.10008
	HIS-33	0.2566	0.0293	0.2038	0.0327	0.1101	0.0262	-0.5481	0.0147	-0.2952	0.0343	-0.05456		0.4534	0.055	0.2259	0.0483	0.001	0.0475	-0.0639	0.0368	-0.1316	0.0552	0.09696		0.0002	0.0134	0.01	0.0145	0.0105	0.0109	-0.0022	0.0144	-0.0042	0.0123	0.00286		0.7108	0.0636	0.4416	0.0607	0.1216	0.0567	-0.6174	0.0395	-0.4291	0.0625	0.0455
	MET-34	0.728	0.0101	0.5763	0.0147	0.1748	0.0209	0.0679	0.0216	0.3914	0.0143	0.38768		-0.0575	0.0036	-0.0636	0.0045	-0.0037	0.009	0.0006	0.0048	-0.0471	0.0048	-0.03426		-0.0048	0.0099	0.0028	0.0118	-0.0009	0.0113	-0.004	0.013	0.0225	0.013	0.00312		0.6662	0.014	0.5158	0.0182	0.1708	0.0231	0.0638	0.0243	0.3667	0.0177	0.35666
	SER-35	0.0333	0.0166	0.1778	0.0067	0.202	0.014	-0.0753	0.0119	-0.0816	0.0175	0.05124		0.1307	0.0261	-0.0242	0.0147	0.0132	0.0286	-0.037	0.0241	0.0307	0.0409	0.02268		0.004	0.0054	0.004	0.0038	0.0154	0.0083	-0.0003	0.0048	-0.0076	0.0064	0.0031		0.1682	0.0295	0.1579	0.016	0.2307	0.033	-0.1136	0.0274	-0.0587	0.0463	0.0769
	PHE-36	-0.0425	0.0167	-0.2662	0.016	-0.2258	0.0148	-0.3647	0.0156	-0.1555	0.0174	-0.21094		0.0409	0.0122	0.0168	0.0115	-0.0436	0.013	-0.0513	0.0153	0.0072	0.0132	-0.006		-0.0024	0.0059	-0.0072	0.0055	0.0072	0.0083	-0.0086	0.0088	-0.0026	0.01	-0.00272		-0.0038	0.0216	-0.2564	0.0208	-0.2627	0.0207	-0.4247	0.0224	-0.1506	0.0229	-0.21964
	SER-37	0.8611	0.0209	0.5282	0.0224	0.5753	0.0339	0.518	0.0335	0.7192	0.0215	0.64036		0.0343	0.0267	-0.0359	0.0217	-0.035	0.0305	-0.0824	0.0242	-0.0511	0.0268	-0.03402		0.0035	0.0096	0.0094	0.0074	-0.0091	0.0083	0.0048	0.0084	0.0015	0.0091	0.00202		0.9002	0.036	0.5024	0.0314	0.5307	0.0455	0.4415	0.0409	0.6695	0.0358	0.60886
	GLU-38	43.5741	0.2533	35.2805	0.2495	42.0697	0.3557	42.4048	0.2997	40.669	0.3109	40.7996		1.1391	0.1221	0.8075	0.1099	0.1188	0.1141	-0.2306	0.088	-0.1036	0.1233	0.34624		0.0085	0.0076	-0.0017	0.0066	0.0064	0.0073	-0.0073	0.006	-0.023	0.0103	-0.00342		44.724	0.2738	36.0924	0.2549	42.2062	0.3678	42.1622	0.3335	40.5336	0.3309	41.1437
	SER-39	-0.527	0.042	-0.4506	0.0374	-0.7114	0.0338	-0.7137	0.0355	-0.6889	0.0364	-0.61832		0.2415	0.0392	-0.0788	0.0354	-0.0136	0.0289	-0.0294	0.0313	-0.1187	0.0404	0.0002		0.0026	0.0066	-0.0068	0.0039	0.0063	0.0051	-0.0151	0.0067	-0.0036	0.0066	-0.00332		-0.2839	0.0582	-0.5359	0.049	-0.72	0.0473	-0.7582	0.0487	-0.8126	0.0553	-0.62212
	ARG-40	-41.4851	0.3418	-29.4132	0.2116	-40.142	0.3836	-43.6043	0.4117	-38.8589	0.4672	-38.7007		0.9957	0.0662	0.5733	0.0581	0.343	0.0643	0.2359	0.0525	0.1108	0.0966	0.45174		-0.007	0.0075	0.0187	0.0101	0.0037	0.0048	0.0012	0.0043	0.0104	0.0069	0.0054		-40.4902	0.3403	-28.8177	0.205	-39.7817	0.3913	-43.3653	0.4092	-38.739	0.4252	-38.2388
	HIS-41	2.091	0.0219	1.9064	0.0187	-0.338	0.1284	-1.7669	0.0501	-0.2347	0.0497	0.33156		-0.4893	0.0222	-0.3881	0.0159	0.2227	0.0394	0.4868	0.0361	0.3523	0.028	0.03688		0.002	0.0063	0.0078	0.0046	0.0061	0.0085	0.0093	0.0113	0.0079	0.0086	0.00662		1.6046	0.0277	1.5256	0.0197	-0.1059	0.1078	-1.2721	0.0525	0.1254	0.0464	0.37552
	ASN-42	-0.8121	0.0506	-1.0767	0.0358	-0.0839	0.0525	0.601	0.0527	-0.5215	0.0509	-0.37864		0.4677	0.0505	0.3784	0.0406	-0.0845	0.0662	-0.1294	0.0462	0.063	0.0673	0.13904		0.0208	0.0108	0.0031	0.0066	-0.0049	0.0037	-0.0108	0.0087	-0.0069	0.006	0.00026		-0.3256	0.0749	-0.6952	0.0496	-0.1716	0.079	0.461	0.0693	-0.4679	0.0723	-0.23986
	GLU-43	29.439	0.1694	24.6165	0.1861	28.5581	0.1771	30.7728	0.1774	28.4958	0.1516	28.3764		0.932	0.1083	0.325	0.0982	-0.0746	0.1138	-0.4392	0.0729	-0.643	0.1119	0.02004		-0.0034	0.0105	0.0091	0.0115	-0.0024	0.0112	-0.0041	0.0115	0.0135	0.0084	0.00254		30.3648	0.1928	24.9409	0.2009	28.4767	0.224	30.3159	0.1918	27.8708	0.1771	28.3938
	ASN-44	0.4132	0.02	0.24	0.019	0.5769	0.0268	0.8409	0.0125	-0.069	0.0495	0.4004		0.0581	0.0358	-0.0164	0.0272	-0.0898	0.0506	-0.3015	0.0456	-0.1233	0.0534	-0.09458		-0.0019	0.0047	0.0002	0.0051	0.0011	0.0047	-0.0176	0.0064	-0.0024	0.0068	-0.00412		0.4698	0.0381	0.2221	0.0312	0.488	0.0596	0.5232	0.0493	-0.1961	0.0686	0.3014
	CYS-45	-0.4504	0.0077	-0.3039	0.0082	-0.2524	0.0104	-0.2231	0.0129	-0.244	0.0109	-0.29476		0.0344	0.0105	0.0426	0.0128	0.0427	0.0178	-0.0027	0.0192	-0.0813	0.0255	0.00714		0.0022	0.0107	0.0237	0.0109	0.0153	0.0101	-0.0148	0.0106	0.0057	0.0114	0.00642		-0.4141	0.0175	-0.2368	0.0202	-0.1946	0.0234	-0.2402	0.0242	-0.3195	0.0307	-0.28104
	LEU-46	-0.2853	0.0051	-0.2152	0.0036	-0.2067	0.0042	-0.2321	0.0049	-0.2393	0.0037	-0.23572		0.0287	0.0032	0.0672	0.0108	0.009	0.0058	0.0243	0.0071	0.0393	0.0147	0.0337		0.0025	0.0102	0.0058	0.0094	-0.0121	0.0086	-0.0135	0.0116	0.0148	0.0155	-0.0005		-0.2542	0.0127	-0.1424	0.0154	-0.2099	0.0109	-0.2212	0.0143	-0.1847	0.0215	-0.20248
	ILE-47	-0.3862	0.0037	-0.274	0.0037	-0.2258	0.0052	-0.2737	0.0074	-0.3101	0.0052	-0.29396		0.1806	0.0241	0.0788	0.0191	0.0231	0.0181	-0.0045	0.0124	0.0027	0.0253	0.05614		0.0133	0.0089	0.0082	0.0113	0.0063	0.0094	0.0078	0.0094	-0.002	0.0124	0.00672		-0.1923	0.0248	-0.1863	0.0222	-0.1963	0.0208	-0.2712	0.0181	-0.308	0.0284	-0.23082
	GLN-48	-0.3524	0.03	-0.2408	0.0214	-0.2183	0.0163	-0.2141	0.0204	-0.2766	0.0214	-0.26044		0.6747	0.061	0.4879	0.0714	0.06	0.0643	-0.2192	0.0467	0.0181	0.0666	0.2043		0.006	0.0087	-0.0084	0.0031	-0.0064	0.0046	0.0049	0.0065	0.0068	0.0091	0.00058		0.3282	0.0686	0.2399	0.0724	-0.1657	0.0672	-0.4307	0.0467	-0.2535	0.0674	-0.05636
	GLU-49	23.4345	0.1182	19.5296	0.1388	21.6061	0.0967	23.3374	0.1261	20.1977	0.1051	21.6211		0.0621	0.0429	0.0644	0.0556	0.1975	0.0686	-0.177	0.0693	-0.2879	0.1105	-0.02818		-0.014	0.0109	-0.0026	0.0126	-0.0122	0.0139	-0.0325	0.0163	0.0018	0.0103	-0.0119		23.4872	0.1267	19.5895	0.145	21.7893	0.1215	23.127	0.1422	19.904	0.1543	21.5794
	GLY-50	0.0607	0.0083	0.0765	0.0067	0.003	0.0068	-0.0195	0.0057	0.0448	0.0048	0.0331		0.0586	0.0039	0.033	0.0047	0.014	0.0024	0.0091	0.0016	0.0027	0.0018	0.02348		-0.0024	0.0022	-0.0015	0.0023	0.0022	0.0035	0.0063	0.0029	0.0005	0.0042	0.00102		0.1173	0.0074	0.1081	0.0073	0.0192	0.0076	-0.0038	0.0063	0.0479	0.0061	0.05774
	ALA-51	-0.0973	0.0087	-0.0431	0.0068	-0.0295	0.009	-0.0095	0.0081	0.0534	0.0085	-0.0252		0.0115	0.0028	0.0319	0.0171	0.0033	0.0016	0.0054	0.0017	0.0051	0.0021	0.01144		0.0072	0.0055	-0.0009	0.0032	-0.0063	0.0052	-0.0173	0.0112	0.0017	0.0068	-0.00312		-0.0782	0.0098	-0.0124	0.0177	-0.0325	0.0087	-0.0221	0.0136	0.0599	0.0101	-0.01706
	LEU-52	0.3251	0.0098	0.2682	0.0078	0.385	0.0076	0.4093	0.0087	0.3982	0.0085	0.35716		-0.0005	0.0065	-0.0032	0.0097	-0.0452	0.0043	-0.0658	0.008	-0.1111	0.0069	-0.04516		-0.0022	0.0098	0.0028	0.0114	0.0061	0.0085	0.0074	0.0083	0.0054	0.0115	0.0039		0.3224	0.0133	0.2682	0.0162	0.346	0.0104	0.3518	0.0134	0.2929	0.0134	0.31626
	LEU-53	-0.1868	0.0114	-0.1162	0.009	-0.0222	0.0118	-0.0545	0.0145	-0.1578	0.0116	-0.1075		0.0383	0.0035	0.0299	0.0036	0.0111	0.0027	0.0166	0.0031	0.0621	0.0037	0.0316		0.0053	0.0097	0.0025	0.0078	0.006	0.009	-0.0391	0.0105	0.0086	0.0119	-0.00334		-0.1427	0.0135	-0.0835	0.0101	-0.0058	0.0132	-0.0764	0.0166	-0.0864	0.0164	-0.07896
	PHE-54	-0.3887	0.0201	-0.2334	0.0168	-0.6456	0.021	-0.5882	0.0207	-0.4531	0.0174	-0.4618		0.1276	0.0139	0.0724	0.0153	0.2337	0.0139	0.1331	0.0141	0.2206	0.0137	0.15748		0.023	0.0136	-0.0184	0.0149	0.0007	0.0099	-0.0219	0.0086	0.0013	0.0145	-0.00306		-0.2383	0.0227	-0.1798	0.0231	-0.4102	0.0189	-0.4769	0.0192	-0.2308	0.0211	-0.3072
	CYS-55	-1.0468	0.0302	-0.9811	0.0275	-1.2791	0.0382	-1.337	0.0489	-1.0783	0.0296	-1.14446		0.2019	0.0158	0.1343	0.0156	0.2533	0.0136	0.2507	0.0144	0.1869	0.0187	0.20542		-0.0079	0.0089	-0.0117	0.0083	-0.0119	0.012	-0.0194	0.0104	0.0153	0.0101	-0.00712		-0.8543	0.0317	-0.8576	0.0334	-1.0364	0.0374	-1.1039	0.0438	-0.8758	0.0307	-0.9456
	GLU-56	34.715	0.2051	35.0327	0.3614	46.3755	0.3725	48.9561	0.3182	38.6422	0.2436	40.7443		-0.8148	0.0912	-1.6963	0.1045	-2.5808	0.1101	-3.6734	0.1228	-3.6736	0.1379	-2.48778		0.0088	0.0083	-0.0082	0.0072	0.0103	0.0083	0.0041	0.0097	-0.0027	0.0109	0.00246		33.905	0.1568	33.3367	0.3167	43.7825	0.3373	45.2842	0.2675	34.9429	0.2111	38.2503
	GLN-57	0.6849	0.0853	0.101	0.0953	-1.3256	0.0808	-1.4471	0.0841	-0.7448	0.0738	-0.54632		0.4867	0.0554	0.3029	0.0566	0.1973	0.0693	0.1249	0.0659	-0.0246	0.0803	0.21744		-0.0047	0.0059	0.0037	0.0056	0.002	0.0061	-0.0066	0.0054	0.003	0.0093	-0.00052		1.1638	0.0923	0.407	0.1156	-1.121	0.104	-1.3331	0.0944	-0.7632	0.1041	-0.3293
	ALA-58	-0.3357	0.0094	-0.3548	0.0068	-0.1568	0.0151	-0.2073	0.0155	-0.1838	0.0109	-0.24768		0.0529	0.0075	0.0188	0.0098	0.0213	0.0098	-0.0007	0.008	0.0229	0.0087	0.02304		-0.0025	0.0058	0.0073	0.0062	-0.0002	0.0035	-0.0005	0.0044	0.0091	0.0055	0.00264		-0.2853	0.0138	-0.3292	0.0127	-0.1361	0.0193	-0.2094	0.0169	-0.1521	0.0155	-0.22242
	VAL-59	0.1496	0.0106	0.1031	0.0065	-0.1521	0.0117	-0.2674	0.0136	-0.1668	0.01	-0.06672		-0.0071	0.0085	-0.0106	0.0112	0.0242	0.0187	-0.0148	0.0103	0.0016	0.0216	-0.00134		-0.0005	0.006	-0.0017	0.0048	0.0043	0.0047	0.0038	0.0049	0.0012	0.0079	0.00142		0.142	0.0133	0.0912	0.0134	-0.1238	0.0218	-0.2785	0.0173	-0.1631	0.0249	-0.06644
	VAL-60	0.3228	0.0109	0.2019	0.0093	-0.0354	0.0083	-0.0642	0.0079	0.0539	0.0071	0.0958		-0.0054	0.0028	0.01	0.0035	0.017	0.0061	0.0158	0.003	0.0212	0.0032	0.01172		-0.0078	0.0059	0.0116	0.006	0.0067	0.0093	-0.0122	0.012	0.014	0.0094	0.00246		0.3099	0.0124	0.2234	0.0117	-0.0115	0.013	-0.0602	0.0148	0.0883	0.0123	0.10998
	ALA-61	-0.4307	0.006	-0.3291	0.005	-0.2868	0.0055	-0.2825	0.0063	-0.3375	0.0059	-0.33332		0.0106	0.0036	0.017	0.0029	0.0143	0.0051	0.0177	0.0059	0.02	0.0036	0.01592		0.0095	0.0067	-0.0031	0.0075	0.0034	0.0111	0.034	0.011	0.0009	0.0096	0.00894		-0.4109	0.0095	-0.315	0.009	-0.2691	0.0131	-0.231	0.014	-0.316	0.0118	-0.3084
	PRO-62	-0.1331	0.0094	-0.1789	0.0071	-0.2017	0.0082	0.0651	0.0053	-0.0897	0.0079	-0.10766		0.0723	0.0148	0.0545	0.0141	-0.004	0.0113	-0.0013	0.0107	0.019	0.0127	0.0281		0.0083	0.0107	-0.006	0.0099	-0.0044	0.0062	0.0002	0.0066	-0.0043	0.0084	-0.00124		-0.0541	0.0222	-0.1304	0.0192	-0.2097	0.0149	0.0643	0.0142	-0.0749	0.0169	-0.08096
	VAL-63	-0.1284	0.0054	-0.0953	0.0039	-0.1696	0.0061	0.0229	0.0035	-0.2151	0.0069	-0.1171		-0.0001	0.0055	-0.0048	0.0049	0.0032	0.0045	0.0047	0.0047	0.0184	0.0158	0.00428		-0.0052	0.0081	-0.0065	0.0066	0.0017	0.0101	0.0039	0.0062	-0.0308	0.0159	-0.00738		-0.1339	0.0104	-0.1066	0.009	-0.1646	0.0131	0.0314	0.0084	-0.2266	0.0238	-0.12006
	SER-64	-0.2053	0.0106	-0.1243	0.0092	-0.206	0.0135	-0.2486	0.0125	-0.1322	0.006	-0.18328		0.4882	0.0463	0.3331	0.0481	0.0952	0.0473	-0.1409	0.0401	0.0037	0.0369	0.15586		0.0038	0.0049	-0.0065	0.0042	-0.0002	0.005	-0.0095	0.0058	-0.0041	0.0113	-0.0033		0.2866	0.05	0.202	0.0507	-0.1111	0.0499	-0.3996	0.0402	-0.1342	0.039	-0.03126
	GLY-65	0.1365	0.0054	0.1467	0.0031	0.1204	0.0034	0.1364	0.0048	-0.0657	0.0053	0.09486		0.0714	0.0118	0.0489	0.0098	0.0118	0.0083	-0.0133	0.0058	0.0612	0.0319	0.036		-0.0012	0.0049	0	0.0041	-0.0013	0.0035	-0.0075	0.0036	-0.0046	0.0079	-0.00292		0.2066	0.0134	0.1958	0.0111	0.1312	0.0096	0.1155	0.0083	-0.0092	0.0325	0.12798
	ASP-66	19.2895	0.067	17.0782	0.1209	20.2302	0.0893	21.6008	0.0886	19.3861	0.0848	19.517		0.4564	0.0797	0.2673	0.0807	0.2338	0.0951	-0.1619	0.0346	-0.0823	0.0858	0.14266		0.0098	0.0034	0.0041	0.0028	-0.0009	0.003	-0.0053	0.0031	0.0048	0.0035	0.0025		19.7532	0.0984	17.3505	0.1316	20.4543	0.127	21.437	0.0926	19.3118	0.1153	19.6614
	LEU-67	-0.1284	0.0048	-0.0765	0.0042	0.1238	0.005	0.1228	0.0052	0.107	0.0045	0.02974		-0.0033	0.0032	-0.0042	0.0023	-0.0014	0.002	-0.0031	0.0016	0.014	0.0041	0.0004		0.0001	0.0094	-0.0003	0.0104	-0.0025	0.0117	0.0155	0.0094	-0.0083	0.0132	0.0009		-0.1312	0.0113	-0.0816	0.0118	0.1194	0.0124	0.1355	0.0107	0.1125	0.0156	0.03092
	VAL-68	0.0105	0.0059	-0.0084	0.0044	0.0315	0.0049	0.0601	0.0063	0.0461	0.0055	0.02796		0.018	0.0042	0.0133	0.0028	0.0108	0.0013	0.0049	0.0032	-0.0016	0.0026	0.00908		-0.0036	0.0092	0.0001	0.0094	-0.0008	0.0074	0.0083	0.0066	-0.0131	0.0161	-0.00182		0.0245	0.012	0.0049	0.0107	0.0421	0.0098	0.0731	0.0092	0.0319	0.0167	0.0353
	PHE-69	-0.1227	0.0071	-0.0394	0.0065	0.0169	0.0091	-0.3697	0.0071	-0.3302	0.0066	-0.16902		-0.0023	0.0126	0.01	0.0059	-0.0123	0.0067	-0.0198	0.0203	0.0437	0.0181	0.00386		0.0104	0.0083	0.0027	0.0063	-0.0047	0.0079	-0.0214	0.0069	0.0103	0.0098	-0.00054		-0.1145	0.0169	-0.0267	0.0108	-0.0003	0.0147	-0.4106	0.0226	-0.2773	0.0224	-0.16588
	ARG-70	-17.1366	0.0682	-15.9605	0.1465	-19.7308	0.0995	-20.8434	0.0926	-17.7072	0.0899	-18.2757		0.1091	0.0458	-0.1288	0.0467	-0.2569	0.0416	-0.3896	0.041	-0.1127	0.0492	-0.15578		-0.0011	0.0067	0.0035	0.0026	0.0031	0.0051	0.0038	0.0075	-0.003	0.0096	0.00126		-17.0245	0.0829	-16.0865	0.1516	-19.9841	0.1083	-21.2311	0.0919	-17.8189	0.0893	-18.429
	PRO-71	-0.3136	0.0028	-0.2878	0.0037	-0.4029	0.004	-0.4363	0.0045	-0.3701	0.0034	-0.36214		0.096	0.0208	0.0472	0.0249	-0.0281	0.0208	-0.0372	0.0135	-0.0082	0.021	0.01394		0.0114	0.0116	-0.0168	0.0104	0.0065	0.0104	-0.0006	0.0087	-0.0247	0.0162	-0.00484		-0.2072	0.0253	-0.259	0.0267	-0.4241	0.0238	-0.4746	0.0165	-0.4016	0.0278	-0.3533
	LEU-72	0.1136	0.0036	0.1348	0.0037	0.2072	0.0049	0.2111	0.0058	0.1546	0.005	0.16426		-0.0109	0.0125	-0.0071	0.0117	-0.0612	0.0126	-0.0648	0.0096	-0.0718	0.014	-0.04316		-0.0062	0.0122	0.0013	0.0139	-0.0151	0.0117	0.0007	0.0115	-0.0014	0.0139	-0.00414		0.0976	0.0172	0.1291	0.0185	0.1315	0.0181	0.1469	0.0147	0.0819	0.0206	0.1174
	LYS-73	-12.4541	0.1106	-14.2738	0.2213	-18.0898	0.1568	-21.5295	0.195	-14.7664	0.1373	-16.2227		-0.0467	0.1091	-0.4259	0.0982	-0.7503	0.1095	-0.6254	0.0912	-0.7139	0.1232	-0.51244		-0.0104	0.0122	0.0097	0.0102	-0.0101	0.0097	0.0015	0.0099	-0.0009	0.0115	-0.00204		-12.5129	0.1346	-14.6799	0.2507	-18.8523	0.1759	-22.1466	0.2042	-15.477	0.1776	-16.7337
	ILE-74	-0.8782	0.0107	-0.6702	0.0133	-0.7467	0.0115	-0.6725	0.0142	-0.667	0.013	-0.72692		0.5968	0.0136	0.4707	0.0143	0.5775	0.0141	0.4058	0.0145	0.3846	0.0149	0.48708		0.0066	0.008	0.0004	0.006	0.005	0.0083	-0.0194	0.009	0.0061	0.0122	-0.00026		-0.2738	0.017	-0.1986	0.0178	-0.1638	0.0185	-0.2863	0.0184	-0.2767	0.021	-0.23984
	GLU-75	14.4986	0.1354	16.0939	0.2604	22.121	0.1724	25.095	0.2132	16.3272	0.1522	18.8271		3.0577	0.1084	2.0621	0.1034	2.0982	0.1273	1.1306	0.0939	1.2892	0.1099	1.92756		-0.0035	0.0061	0.0064	0.0062	-0.0011	0.0067	-0.002	0.0069	0.0066	0.0082	0.00128		17.5542	0.1553	18.1474	0.2497	24.2163	0.2085	26.2195	0.2024	17.6274	0.1792	20.753
	VAL-76	-1.5371	0.0122	-1.2416	0.0115	-1.352	0.0124	-1.24	0.0144	-1.3798	0.0117	-1.3501		0.9795	0.0145	0.7689	0.0122	0.8635	0.0135	0.6567	0.014	0.7408	0.0103	0.80188		-0.0141	0.0087	-0.0022	0.0066	-0.0065	0.008	0.0083	0.0073	-0.0058	0.0116	-0.00406		-0.5728	0.0149	-0.4754	0.013	-0.4961	0.0157	-0.5755	0.0141	-0.6445	0.0146	-0.55286
	LEU-77	-1.4113	0.0178	-1.4182	0.0175	-1.5057	0.0182	-1.5809	0.0175	-1.3186	0.0195	-1.44694		1.0741	0.0128	0.9598	0.0125	1.0873	0.0136	0.9485	0.0141	0.9349	0.0136	1.00092		-0.0073	0.0141	-0.0062	0.0138	-0.0412	0.0137	-0.0109	0.0158	0.0134	0.0208	-0.01044		-0.3437	0.0185	-0.4643	0.0198	-0.459	0.019	-0.6427	0.0215	-0.3702	0.0247	-0.45598
	SER-78	-3.007	0.0299	-2.5505	0.0344	-2.9642	0.0295	-3.0018	0.0385	-2.7897	0.0255	-2.86264		1.9662	0.0341	1.5649	0.0307	2.0789	0.0287	1.7716	0.0363	1.8061	0.0401	1.83754		-0.016	0.0133	0.0256	0.011	0.0158	0.0131	-0.0488	0.0131	0.0257	0.0133	0.00046		-1.0572	0.0296	-0.9605	0.0312	-0.8692	0.0325	-1.28	0.0361	-0.9565	0.0409	-1.02468
	LYS-79	-12.1806	0.1617	-16.1115	0.3083	-19.7778	0.1817	-23.8949	0.2205	-14.1147	0.1647	-17.2159		-2.4538	0.1265	-2.0086	0.1066	-2.7817	0.1141	-1.2916	0.113	-1.7281	0.1458	-2.05276		-0.014	0.0115	-0.0021	0.0127	-0.0043	0.0116	0.0043	0.0157	0.0141	0.0147	-0.0004		-14.6455	0.1582	-18.1199	0.3064	-22.5616	0.2173	-25.1701	0.2006	-15.8167	0.2075	-19.2628
	LEU-80	-3.3173	0.0437	-2.9538	0.0406	-3.2399	0.0366	-3.0611	0.034	-3.0548	0.0329	-3.12538		2.4557	0.0415	1.9969	0.0336	2.2219	0.036	1.9148	0.0319	2.1688	0.0278	2.15162		-0.0185	0.0183	-0.015	0.0162	-0.0141	0.0152	0.0377	0.0136	-0.0078	0.015	-0.00354		-0.8792	0.0256	-0.9715	0.0253	-1.0315	0.0212	-1.1075	0.0218	-0.8947	0.0206	-0.97688
	LEU-81	-3.3882	0.0565	-2.6078	0.0502	-3.1292	0.0497	-3.3566	0.0451	-3.415	0.0454	-3.17936		3.2394	0.0478	2.2986	0.04	3.0941	0.0417	3.1506	0.0416	3.1963	0.0392	2.9958		-0.0182	0.0144	0.0033	0.0137	-0.0024	0.0103	-0.0011	0.0109	0.0033	0.0126	-0.00302		-0.1686	0.0357	-0.3083	0.0314	-0.0369	0.0284	-0.2071	0.0282	-0.2154	0.0249	-0.18726
	ALA-82	-14.7484	0.1852	-13.3779	0.1495	-13.881	0.13	-13.4483	0.1286	-13.718	0.1237	-13.8347		14.6581	0.1678	13.0502	0.139	13.9877	0.108	13.6959	0.1478	13.6086	0.0908	13.8001		-0.4758	0.013	-0.4563	0.0108	-0.3486	0.0102	-0.4849	0.0123	-0.3057	0.0127	-0.41426		-0.5581	0.1087	-0.7931	0.0995	-0.2426	0.0994	-0.229	0.1045	-0.4197	0.0978	-0.4485
	PHE-83	-15.0113	0.3012	-7.4341	0.1849	-10.3503	0.171	-8.8723	0.1372	-9.0163	0.1429	-10.1369		13.15	0.2524	5.2625	0.2019	8.4854	0.2178	6.4631	0.1827	7.2258	0.1807	8.11736		-0.4272	0.0205	-0.1348	0.0127	-0.2824	0.0152	-0.1528	0.0117	-0.162	0.0124	-0.23184		-2.2758	0.1211	-2.3035	0.0553	-2.1475	0.081	-2.549	0.0723	-1.9506	0.0743	-2.24528
	ILE-84	0.1696	0.0801	0.9112	0.0531	-0.4557	0.0611	-0.3069	0.0592	0.6683	0.0493	0.1973		-2.0732	0.0476	-2.7502	0.0483	-2.1846	0.044	-2.2336	0.0461	-2.4292	0.0371	-2.33416		-0.0056	0.0082	0.0016	0.0066	-0.0107	0.0051	-0.0064	0.008	-0.0001	0.0119	-0.00424		-1.9078	0.0548	-1.8366	0.0353	-2.6489	0.0407	-2.5437	0.0391	-1.7621	0.0361	-2.13982
	ASP-85	-53.2921	1.9499	-67.2838	0.6888	-52.2166	0.5263	-49.4578	0.606	-58.7319	0.616	-56.1964		126.685	1.8692	145.118	0.7176	144.434	0.6431	140.397	0.652	136.773	0.6399	138.681		-1.8048	0.022	-1.9991	0.0135	-1.9394	0.0149	-1.9857	0.0163	-1.9935	0.0128	-1.9445		71.5306	0.5725	75.8676	0.7408	90.2728	0.6719	88.9758	0.6123	76.0024	0.5569	80.5298
	GLY-86	-5.3541	0.117	-11.7436	0.1284	-12.2142	0.118	-12.5051	0.1133	-10.758	0.1539	-10.515		4.2903	0.1378	7.4985	0.1958	9.1261	0.1778	8.7808	0.1914	7.5791	0.1961	7.45496		-0.3087	0.0088	-0.444	0.0098	-0.3189	0.0097	-0.3422	0.0093	-0.4283	0.0104	-0.36842		-1.37	0.1106	-4.6922	0.1555	-3.4104	0.1437	-4.0594	0.1613	-3.6144	0.1635	-3.42928
	ALA-87	1.1397	0.1494	-9.9183	0.1659	-7.9686	0.1169	-8.596	0.16	-7.9177	0.1447	-6.65218		2.6461	0.1775	14.8686	0.1384	12.2776	0.1124	12.6624	0.1409	12.235	0.1474	10.9379		-0.1779	0.0087	-0.5815	0.0095	-0.5568	0.0097	-0.5788	0.0102	-0.5094	0.0091	-0.48088		3.6046	0.0673	4.3765	0.1591	3.7512	0.1128	3.4943	0.126	3.8137	0.1106	3.80806
	GLY-88	1.4526	0.0714	-0.2172	0.0587	-1.0298	0.0594	-0.9964	0.0701	-0.4873	0.0714	-0.25562		-0.0908	0.086	2.0951	0.091	3.9486	0.1067	4.0467	0.1099	1.6536	0.0955	2.33064		-0.0824	0.011	-0.1351	0.0106	-0.099	0.0102	-0.1321	0.0118	-0.1174	0.0115	-0.1132		1.2781	0.0636	1.7436	0.0668	2.8194	0.0794	2.9156	0.0968	1.0497	0.0659	1.96128
	LEU-89	-12.9088	0.2026	-17.5716	0.3249	-20.5099	0.1612	-20.5621	0.1601	-17.7486	0.2248	-17.8602		1.6446	0.0911	5.4278	0.2839	4.6833	0.0731	4.8714	0.0699	2.6582	0.1048	3.85706		-1.9935	0.0307	-2.3754	0.0307	-2.2409	0.0179	-2.1252	0.021	-2.4699	0.0225	-2.24098		-13.2406	0.17	-14.5271	0.1813	-18.0742	0.1482	-17.8206	0.1349	-17.5617	0.1914	-16.2448
	VAL-90	1.3373	0.1562	1.8789	0.1546	-6.6949	0.1699	-8.088	0.1521	0.2034	0.1784	-2.27266		-0.4251	0.1319	-0.6402	0.1873	7.2463	0.1606	7.819	0.1235	-0.3006	0.1419	2.73988		-0.2792	0.0198	-0.1989	0.0222	-0.7931	0.0166	-0.7182	0.0126	-0.2947	0.0219	-0.45682		0.6364	0.1042	1.0323	0.0917	-0.2464	0.1387	-0.9775	0.1275	-0.3939	0.1095	0.01018
	ASP-91	73.2008	0.8901	55.1554	0.7132	67.0759	0.4906	67.5035	0.5058	61.1466	0.7054	64.8164		-12.2263	0.8463	-9.4116	0.8955	-10.7148	0.3013	-10.0302	0.27	-15.2772	0.7668	-11.532		-0.2824	0.0203	-0.3449	0.0189	-0.1226	0.0096	-0.1132	0.0096	-0.4308	0.0154	-0.25878		60.7452	0.5565	45.3753	0.5557	56.2519	0.3006	57.3687	0.3854	45.4692	0.3871	53.0421
	THR-92	-14.8997	0.8486	-17.1842	0.6312	-8.9075	0.3958	-11.3152	0.3423	-11.6859	0.5728	-12.7985		14.5269	0.7588	16.9386	0.5663	4.2764	0.3846	6.4462	0.3596	9.601	0.5635	10.3578		-0.5824	0.0396	-0.5547	0.0233	-1.1962	0.0517	-1.5249	0.0404	-0.297	0.0265	-0.83104		-0.9357	0.2393	-0.7995	0.2472	-5.8231	0.1695	-6.4019	0.1576	-2.3847	0.1841	-3.26898
	THR-93	-5.3233	0.1845	-7.1716	0.2448	-3.3345	0.0662	-3.6546	0.0656	-3.7091	0.0808	-4.63862		3.5221	0.1661	4.4129	0.2025	1.4177	0.0662	1.3928	0.0558	2.3356	0.0845	2.61622		-0.1451	0.0154	-0.1833	0.0127	-0.0045	0.0037	-0.0001	0.0021	0.0184	0.0063	-0.06292		-1.9449	0.1017	-2.9498	0.1481	-1.9227	0.0533	-2.2595	0.0513	-1.3505	0.0486	-2.08548
	TYR-94	-0.978	0.0759	-0.4165	0.0565	0.8425	0.0748	0.8166	0.0709	-3.2655	0.0588	-0.60018		0.8938	0.0875	0.5169	0.0576	-0.321	0.0611	-0.2984	0.0438	1.7799	0.0627	0.51424		-0.0116	0.0071	0.0001	0.0057	-0.0193	0.0062	-0.0023	0.0067	0.0084	0.0087	-0.00494		-0.0963	0.0669	0.104	0.0515	0.5007	0.0534	0.5139	0.0518	-1.4802	0.0632	-0.09158
	ALA-95	0.2123	0.0292	0.3012	0.0341	2.1258	0.0475	2.0861	0.0566	-3.0696	0.0402	0.33116		-0.1496	0.0196	-0.0997	0.0217	-0.2872	0.0365	-0.2307	0.0283	1.9205	0.0435	0.23066		0.0069	0.0087	0.0055	0.0051	0.0041	0.0049	0.0081	0.005	-0.0005	0.0068	0.00482		0.0715	0.0315	0.208	0.03	1.843	0.0446	1.8656	0.0506	-1.148	0.0202	0.56802
	GLU-96	40.0841	0.4101	34.1862	0.3809	47.4554	0.3507	47.918	0.3504	57.6165	0.4787	45.452		-0.1978	0.1139	-1.298	0.1226	-1.7619	0.0939	-1.5604	0.0692	-6.6742	0.2831	-2.29846		0.0214	0.0119	0.006	0.0094	-0.0058	0.0067	0.0213	0.0093	-0.0049	0.0093	0.0076		39.9131	0.373	32.9039	0.3205	45.6738	0.3475	46.391	0.359	50.9534	0.3273	43.167
	SER-97	-1.5179	0.055	-0.4546	0.065	-2.0666	0.0646	-2.6022	0.0637	-1.1665	0.0415	-1.56156		0.7582	0.0352	0.1447	0.0435	0.7354	0.0409	0.726	0.0398	0.6909	0.0461	0.61104		-0.0099	0.0066	0.0031	0.0076	-0.0038	0.0096	0.0075	0.0051	0.0016	0.0085	-0.0003		-0.7698	0.0429	-0.3099	0.0438	-1.3336	0.0607	-1.8703	0.0638	-0.4743	0.0461	-0.95158
	ASP-98	36.7535	0.2405	31.665	0.2925	41.5913	0.2678	44.4738	0.3423	34.0488	0.186	37.7065		-2.5792	0.1296	-2.6532	0.1297	-3.3395	0.1099	-4.1259	0.0976	-3.7141	0.1449	-3.28238		0.0096	0.0143	0.0141	0.0115	-0.0088	0.0079	-0.0059	0.0078	0.0143	0.0084	0.00466		34.1799	0.2098	29.0368	0.2343	38.2418	0.2227	40.3358	0.3028	30.3473	0.162	34.4283
	LYS-99	-49.749	0.3418	-43.2177	0.349	-49.8208	0.2596	-52.3689	0.4093	-47.2683	0.365	-48.4849		4.376	0.122	3.873	0.1442	2.5729	0.0902	2.5391	0.0766	4.2804	0.2042	3.52828		0.0025	0.0076	-0.0048	0.0074	-0.0111	0.0079	0.0123	0.0096	-0.0232	0.0125	-0.00486		-45.359	0.3029	-39.3494	0.2864	-47.2704	0.2602	-49.8108	0.4004	-42.9936	0.2664	-44.9566
	TRP-100	0.7067	0.0145	0.7475	0.0145	0.4625	0.0238	0.6301	0.0207	0.59	0.0154	0.62736		-0.1517	0.0158	-0.1909	0.0147	-0.0769	0.0183	-0.2674	0.0203	-0.3129	0.0254	-0.19996		-0.008	0.0122	0.0099	0.0098	-0.0219	0.0103	-0.0491	0.0167	0.0196	0.0116	-0.0099		0.5464	0.0237	0.5655	0.0181	0.3635	0.0289	0.3106	0.029	0.2976	0.0288	0.41672
	VAL-101	-0.2498	0.0112	-0.1579	0.0089	-0.3032	0.0126	-0.2713	0.0092	-0.1657	0.0088	-0.22958		-0.0212	0.0048	-0.0382	0.006	0.0189	0.005	0.0079	0.0034	0.0063	0.0046	-0.00526		-0.0101	0.0091	-0.0022	0.0089	-0.0033	0.0108	0.0083	0.0096	0.0068	0.0083	-0.0001		-0.2811	0.0132	-0.1975	0.0118	-0.2877	0.015	-0.2549	0.0124	-0.1526	0.011	-0.23476
	LEU-102	-0.4608	0.0106	-0.3541	0.0075	-0.3485	0.0064	-0.3772	0.0063	-0.3938	0.0063	-0.38688		0.2298	0.0211	0.1606	0.0281	0.0539	0.0253	-0.003	0.0189	-0.0345	0.0295	0.08136		-0.0042	0.0181	0.0005	0.0128	-0.0259	0.0151	-0.0231	0.0156	0.0144	0.0115	-0.00766		-0.2351	0.029	-0.1924	0.0308	-0.3198	0.028	-0.4047	0.0248	-0.4147	0.033	-0.31334
	LEU-103	0.2497	0.0055	0.1373	0.0048	0.0897	0.0038	0.0531	0.004	0.0704	0.0028	0.12004		-0.0664	0.007	-0.0432	0.0077	-0.0509	0.0087	-0.0324	0.0069	-0.0264	0.0035	-0.04386		0.0041	0.0084	0.001	0.01	-0.0113	0.0095	-0.0033	0.0089	-0.0093	0.0108	-0.00376		0.1878	0.0124	0.095	0.0123	0.0271	0.0135	0.0179	0.0109	0.0349	0.0113	0.07254
	SER-104	0.1536	0.0154	0.155	0.0118	0.1665	0.012	0.0444	0.0126	0.109	0.0055	0.1257		0.4109	0.0448	0.2488	0.0425	-0.0193	0.0381	-0.105	0.0268	-0.0287	0.0082	0.10134		0.009	0.0035	0.0005	0.0031	-0.0055	0.0035	0.0064	0.0034	-0.0107	0.0066	-6e-05		0.5747	0.0497	0.4037	0.0453	0.1411	0.0409	-0.0555	0.0276	0.0694	0.0116	0.22668
	PRO-105	-0.2654	0.0026	-0.1959	0.0025	-0.2467	0.002	-0.2046	0.0031	-0.2641	0.0021	-0.23534		0.007	0.0156	-0.0128	0.0106	0.0192	0.0124	0.026	0.0105	-0.044	0.0143	-0.00092		0.0087	0.0072	0.0048	0.0053	-0.0015	0.0062	0.0015	0.0068	-0.0112	0.007	0.00046		-0.2489	0.0165	-0.2039	0.0124	-0.2291	0.0134	-0.1773	0.0126	-0.3192	0.0162	-0.23568
	GLU-106	16.3988	0.1067	13.967	0.1311	16.8016	0.0755	17.4348	0.0917	15.8303	0.0659	16.0865		0.9511	0.1216	0.5821	0.1105	0.1315	0.1145	-0.1821	0.1045	-0.2388	0.1182	0.24876		0.0015	0.0044	0.0014	0.0058	-0.0111	0.0061	0.0052	0.0053	0.0013	0.0103	-0.00034		17.3609	0.1644	14.5476	0.1684	16.9128	0.1358	17.2532	0.147	15.5923	0.1308	16.3334
	PHE-107	-0.3998	0.0038	-0.1955	0.0061	-0.1464	0.0063	-0.3014	0.0048	-0.3414	0.0044	-0.2769		0.1077	0.0171	0.0833	0.0162	0.0394	0.007	0.0022	0.015	0.0463	0.0104	0.05578		0.0028	0.0052	-0.0055	0.0075	-0.0013	0.0069	-0.0083	0.006	-0.0068	0.0077	-0.00382		-0.2893	0.0185	-0.1173	0.0189	-0.1083	0.0122	-0.3063	0.0177	-0.3017	0.0141	-0.22458
	ARG-108	-18.2688	0.0957	-15.353	0.1349	-18.2689	0.0958	-20.1478	0.1092	-17.9305	0.0785	-17.9938		0.1652	0.0416	0.2336	0.0573	-0.0896	0.0451	-0.2611	0.0394	0.0798	0.0461	0.02558		-0.0041	0.007	-0.0094	0.0076	0.0005	0.007	0.0119	0.0069	0.0062	0.0136	0.00102		-18.1052	0.1057	-15.134	0.1497	-18.3568	0.1018	-20.3999	0.1101	-17.846	0.084	-17.9684
	ALA-109	-0.1416	0.0048	-0.0946	0.0035	-0.1367	0.0039	-0.1341	0.0045	-0.2353	0.0029	-0.14846		0.2012	0.0261	0.0347	0.0194	0.0371	0.0183	-0.034	0.0186	-0.0319	0.0218	0.04142		-0.0015	0.0032	0.0033	0.0052	0.0122	0.005	-0.0097	0.0047	-0.0005	0.0065	0.00076		0.0591	0.0268	-0.057	0.02	-0.0883	0.0194	-0.1773	0.0189	-0.2683	0.0215	-0.10636
	ILE-110	-0.2138	0.0038	-0.1512	0.0034	-0.199	0.0036	-0.1942	0.004	-0.3168	0.0028	-0.215		0.0051	0.01	-0.0154	0.0093	0.0206	0.008	0.0132	0.0082	0.0049	0.0045	0.00568		-0.0283	0.0172	-0.0013	0.0114	0.0062	0.008	-0.0065	0.0124	0.0207	0.0093	-0.00184		-0.2362	0.0195	-0.1681	0.015	-0.1719	0.0127	-0.1879	0.0156	-0.2913	0.0109	-0.21108
	TRP-111	-0.2568	0.0051	-0.2778	0.0049	-0.4018	0.0066	-0.1527	0.0059	-0.5861	0.0061	-0.33504		0.0757	0.0246	0.0549	0.0161	-0.0511	0.013	-0.0557	0.0117	-0.0402	0.0144	-0.00328		0.0057	0.0072	0.0008	0.0066	0.0024	0.0089	-0.0056	0.0053	0.0087	0.0111	0.0024		-0.1754	0.0267	-0.2215	0.02	-0.4513	0.0179	-0.2136	0.0142	-0.6169	0.0189	-0.33574
	GLN-112	-0.0414	0.0158	-0.0111	0.0099	0.0125	0.0138	0.0016	0.0132	-0.1195	0.0153	-0.03158		0.4478	0.0557	-0.0126	0.0534	-0.2365	0.0565	-0.5898	0.0491	-0.6271	0.0784	-0.20364		0.0015	0.0059	0.003	0.0081	0.0199	0.009	-0.0083	0.0069	0.0079	0.0101	0.0048		0.4084	0.0565	-0.0199	0.0561	-0.2065	0.0589	-0.5946	0.0527	-0.7412	0.0752	-0.23076
	ASP-113	12.3539	0.0577	12.0786	0.139	14.2097	0.0815	15.4853	0.0777	12.388	0.0667	13.3031		0.6753	0.0926	0.5168	0.0787	0.4714	0.0793	0.039	0.0677	-0.0136	0.1166	0.33778		0.002	0.0016	-0.0033	0.0029	0.0024	0.0023	-0.0038	0.0031	-0.014	0.0049	-0.00334		13.035	0.1037	12.5898	0.1523	14.6796	0.1147	15.5187	0.1009	12.3625	0.1319	13.6371
	ARG-114	-13.9869	0.0777	-14.1711	0.1559	-16.4788	0.1124	-17.8857	0.1079	-13.6443	0.0893	-15.2334		0.5139	0.0659	0.0299	0.0621	-0.1911	0.0609	-0.3373	0.0543	-0.1622	0.07	-0.02936		0.0147	0.0078	-0.0063	0.0101	0.0076	0.0095	-0.0139	0.0083	-0.014	0.0086	-0.00238		-13.4612	0.1026	-14.1427	0.1717	-16.6629	0.1312	-18.2341	0.1198	-13.827	0.1058	-15.2656
	LYS-115	-10.6612	0.072	-11.1428	0.1501	-12.9755	0.117	-14.8915	0.1043	-10.5606	0.0688	-12.0463		0.6953	0.1221	0.3495	0.1141	-0.4225	0.0891	-0.415	0.0817	-0.2103	0.1364	-0.0006		-0.0015	0.0089	-0.0097	0.0088	0.0165	0.0094	-0.0157	0.0089	0.0049	0.0086	-0.0011		-9.9695	0.1348	-10.8034	0.1974	-13.3853	0.1351	-15.3181	0.1313	-10.7668	0.1576	-12.0486
	ARG-116	-12.1244	0.0632	-11.7871	0.1285	-13.7916	0.0767	-14.6502	0.0806	-12.6434	0.0723	-12.9993		0.336	0.0575	0.041	0.0562	-0.0477	0.0523	-0.2794	0.0466	-0.1298	0.0569	-0.01598		-0.004	0.0048	0.0001	0.0064	0.0001	0.0055	0.0075	0.0053	0.0357	0.0132	0.00788		-11.7932	0.0892	-11.7508	0.1511	-13.8417	0.0878	-14.9255	0.0953	-12.7419	0.0904	-13.0106
	CYS-117	-0.0525	0.008	0.0007	0.0089	0.0794	0.0077	0.2641	0.006	0.0577	0.0104	0.06988		0.1717	0.0062	0.149	0.0062	0.1422	0.0065	0.0755	0.0058	0.0535	0.0129	0.11838		0.0005	0.0041	0	0.0061	-0.0019	0.0058	-0.0119	0.0047	-0.0147	0.0075	-0.0056		0.1197	0.0106	0.1492	0.0119	0.2193	0.0106	0.3277	0.0084	0.0961	0.0181	0.1824
	GLU-118	11.3088	0.0887	12.1637	0.1986	14.563	0.1258	18.0873	0.1335	13.2615	0.0965	13.8769		2.191	0.1099	1.8375	0.0936	1.5056	0.0765	0.8524	0.0841	0.116	0.1153	1.3005		-0.0007	0.0116	0.0024	0.012	-0.0027	0.0101	-0.0242	0.0154	-0.0153	0.0117	-0.0081		13.4945	0.127	14.0059	0.2083	16.0638	0.1496	18.9188	0.146	13.3564	0.141	15.1679
	TYR-119	-0.4095	0.0093	-0.4002	0.0095	-0.3614	0.008	-0.2105	0.0099	-0.3476	0.0124	-0.34584		0.5275	0.0373	0.42	0.0378	0.2748	0.0279	0.1839	0.0221	0.0449	0.0422	0.29022		0.0121	0.0127	-0.005	0.0112	0.0121	0.0077	0.0049	0.008	-0.0049	0.0143	0.00384		0.1305	0.0409	0.0152	0.0398	-0.0735	0.0306	-0.0212	0.0237	-0.3082	0.0429	-0.05144
	TRP-120	-0.425	0.008	-0.3194	0.0108	-0.2383	0.0079	-0.164	0.0069	0.0136	0.0089	-0.22662		0.3979	0.0216	0.4236	0.0251	0.224	0.0264	0.143	0.014	0.0725	0.0344	0.2522		-0.0164	0.0159	-0.0245	0.0107	0.0237	0.0095	0.0075	0.0126	0.024	0.0106	0.00286		-0.0455	0.0288	0.0809	0.0281	0.0085	0.0294	-0.013	0.0209	0.1112	0.0364	0.02842
	PHE-121	-0.2404	0.0082	-0.2276	0.01	-0.1444	0.0076	-0.0764	0.0075	-0.0775	0.008	-0.15326		0.3073	0.0066	0.2533	0.0068	0.2113	0.0056	0.1454	0.0048	0.1379	0.0055	0.21104		-0.0109	0.0105	0.0053	0.0089	-0.015	0.0098	0.0096	0.0071	-0.0174	0.0086	-0.00568		0.056	0.0132	0.0306	0.0134	0.0518	0.0126	0.0787	0.0116	0.0434	0.0106	0.0521
	LEU-122	-0.6266	0.0091	-0.5647	0.0149	-0.433	0.01	-0.3397	0.011	-0.3506	0.0097	-0.46292		0.4766	0.0066	0.459	0.0085	0.4312	0.0075	0.3354	0.0076	0.2943	0.0078	0.3993		-0.0431	0.0167	-0.0034	0.0128	-0.0197	0.013	0.0128	0.0134	-0.0271	0.0188	-0.0161		-0.1921	0.0196	-0.1082	0.0175	-0.0212	0.0157	0.0082	0.0159	-0.0825	0.0208	-0.07916
	GLN-123	-0.4732	0.0277	-0.6416	0.0255	-0.6373	0.0291	-0.416	0.028	-0.4976	0.0265	-0.53314		0.6999	0.0538	0.4969	0.0589	0.2414	0.0496	0.1177	0.0519	0.0178	0.0598	0.31474		0.0138	0.0093	0.007	0.008	0.0058	0.009	-0.0064	0.01	0.0115	0.013	0.00634		0.2406	0.0581	-0.1364	0.0575	-0.3907	0.055	-0.3043	0.0567	-0.4666	0.0598	-0.21148
	GLN-124	0.2666	0.0184	0.2283	0.0203	0.472	0.0198	0.427	0.0221	0.499	0.0189	0.37858		0.1999	0.0211	0.1643	0.02	0.0719	0.0186	0.0045	0.0199	-0.0044	0.0176	0.08724		-0.0011	0.0047	-0.0006	0.0048	-0.003	0.005	-0.0033	0.0054	-0.017	0.0098	-0.005		0.4672	0.0247	0.392	0.0248	0.5416	0.0252	0.4301	0.0269	0.4791	0.0241	0.462
	ILE-125	-0.7748	0.0238	-0.3131	0.026	-0.0475	0.0171	-0.0709	0.0142	-0.1274	0.0193	-0.26674		0.8541	0.0153	0.535	0.0194	0.405	0.0149	0.3341	0.0122	0.3239	0.0126	0.49042		0.0021	0.0097	0.0072	0.0092	-0.021	0.0117	0.0021	0.0107	0.0011	0.0139	-0.0017		0.0817	0.0156	0.2291	0.0164	0.3367	0.0154	0.2655	0.0157	0.1973	0.0179	0.22206
	ILE-126	-1.887	0.021	-1.6033	0.0286	-1.648	0.0265	-1.5352	0.0173	-1.5769	0.0175	-1.65008		0.7452	0.0227	0.8301	0.0287	0.9241	0.0271	0.8465	0.0177	0.6791	0.0184	0.805		-0.0014	0.0073	-0.0033	0.008	0.0035	0.0096	0.005	0.0095	-0.0188	0.0215	-0.003		-1.1431	0.022	-0.777	0.0215	-0.7203	0.0219	-0.6839	0.019	-0.9175	0.0282	-0.84836
	THR-127	1.0085	0.0286	0.8509	0.0327	0.865	0.0273	0.8222	0.0208	0.713	0.0224	0.85192		-0.1173	0.0271	-0.2187	0.0333	-0.0839	0.0284	-0.1051	0.0249	-0.1176	0.032	-0.12852		-0.0155	0.0077	0.0051	0.0061	-0.0048	0.006	0.004	0.0079	0.0119	0.0113	0.00014		0.8753	0.0316	0.6378	0.0339	0.7765	0.0347	0.7176	0.0309	0.6054	0.0385	0.72252
	PRO-128	-0.0958	0.0187	-0.1336	0.0149	-0.1474	0.014	-0.2136	0.0125	-0.0756	0.0143	-0.1332		-0.2772	0.018	-0.2852	0.0193	-0.37	0.0173	-0.3213	0.0154	-0.3031	0.0193	-0.31136		0.0074	0.0067	-0.0046	0.0045	-0.0126	0.0062	0.0043	0.0055	-0.0074	0.0139	-0.00258		-0.364	0.0206	-0.4238	0.0199	-0.5298	0.0176	-0.5317	0.016	-0.3857	0.0244	-0.447
	SER-129	0.7222	0.0286	0.6349	0.024	0.8363	0.0282	0.9287	0.0269	0.6983	0.0251	0.76408		-0.0065	0.0392	-0.1211	0.0404	-0.1979	0.0416	-0.4087	0.0291	-0.293	0.0368	-0.20544		0.0027	0.0032	-0.0019	0.0021	-0.0008	0.0034	-0.0016	0.0023	0.0007	0.0042	-0.00018		0.7196	0.0395	0.5097	0.0423	0.637	0.0462	0.5175	0.0348	0.4059	0.0379	0.55794
	PRO-130	1.1827	0.0231	1.013	0.022	1.2198	0.0203	1.1946	0.0203	1.1175	0.0167	1.14552		-0.5855	0.0212	-0.5894	0.0216	-0.6356	0.0144	-0.7047	0.0146	-0.804	0.0159	-0.66384		-0.0055	0.0091	0.018	0.0139	-0.0008	0.0076	-0.0124	0.0062	-0.0088	0.0079	-0.0019		0.5919	0.0206	0.4415	0.0188	0.5825	0.0164	0.4779	0.0161	0.3057	0.0154	0.4799
	ALA-131	1.5891	0.0199	1.4633	0.0221	1.8576	0.0197	1.8854	0.0191	1.5106	0.0196	1.6612		-0.5671	0.0239	-0.607	0.0256	-0.6968	0.022	-0.8022	0.0236	-0.7945	0.0221	-0.69352		0.0088	0.0093	0.0043	0.0058	-0.0012	0.0058	0.0131	0.0075	0.0025	0.0087	0.0055		1.0288	0.0227	0.8607	0.0197	1.1593	0.0246	1.0961	0.0251	0.7191	0.0212	0.9728
	PHE-132	0.9566	0.0298	0.7165	0.0316	1.314	0.0296	1.3295	0.0309	1.0079	0.0326	1.0649		-0.2593	0.0254	-0.1971	0.0243	-0.1032	0.0301	-0.2119	0.0268	-0.3528	0.0291	-0.22486		0.0046	0.0078	0.0009	0.0088	0.0006	0.0097	0.0045	0.0088	-0.0172	0.0089	-0.00132		0.7026	0.0214	0.5215	0.0201	1.2122	0.0252	1.1221	0.0225	0.6386	0.0208	0.8394
	ASN-133	3.0071	0.1128	2.3371	0.06	1.5694	0.064	1.4106	0.0531	2.9754	0.0649	2.25992		-2.772	0.1365	-2.2063	0.102	0.5155	0.1794	-0.0322	0.1582	-3.2253	0.1006	-1.54406		-0.0108	0.0082	-0.0177	0.0129	0.0016	0.0133	-0.0362	0.0184	0.0371	0.0111	-0.0052		0.2157	0.0704	0.113	0.0726	2.0786	0.1523	1.345	0.1426	-0.2105	0.0648	0.70836
	LYS-134	-43.0135	0.3926	-37.5638	0.4244	-51.0404	0.4744	-56.179	0.4356	-35.1731	0.2063	-44.594		4.2157	0.2023	5.7809	0.2582	6.7103	0.2708	9.5317	0.2687	3.0289	0.1481	5.8535		-0.0049	0.0163	0.0067	0.0134	-0.0064	0.0139	0.0148	0.0137	-0.0168	0.0162	-0.00132		-38.8118	0.3015	-31.763	0.2584	-44.3375	0.3172	-46.6332	0.2946	-32.1655	0.2065	-38.7422
	VAL-135	2.2921	0.0287	2.2277	0.0331	2.9476	0.0314	2.7267	0.0333	2.342	0.0318	2.50722		-1.6567	0.0228	-1.3721	0.0261	-2.1112	0.0231	-1.8991	0.0238	-1.7399	0.0322	-1.7558		0.0134	0.0093	0.0152	0.0109	-0.0107	0.008	0.013	0.0077	0.0046	0.0116	0.0071		0.6504	0.0173	0.871	0.0188	0.8253	0.02	0.8413	0.0208	0.6055	0.0182	0.7587
	LEU-136	-1.981	0.0618	-1.3755	0.0817	-0.6727	0.0768	-0.9448	0.0735	-1.9644	0.0588	-1.38768		-1.2177	0.0766	-1.2312	0.0526	-2.4326	0.0785	-1.1889	0.1083	-1.4646	0.0655	-1.507		-0.2478	0.0136	-0.2453	0.0125	-0.2644	0.0111	-0.3108	0.0114	-0.3474	0.0159	-0.28314		-3.4502	0.0617	-2.8531	0.0724	-3.3738	0.086	-2.4494	0.0973	-3.7739	0.0549	-3.18008
	ALA-137	3.336	0.0661	3.1631	0.0782	1.7222	0.0745	1.4308	0.103	3.7687	0.0713	2.68416		-6.0541	0.076	-4.8055	0.0861	-8.7597	0.0738	-8.2152	0.1017	-5.781	0.0913	-6.7231		-0.0463	0.0128	-0.067	0.009	-0.4194	0.0098	-0.4196	0.009	0.0163	0.01	-0.1872		-2.7535	0.072	-1.7081	0.0803	-7.456	0.0734	-7.2039	0.085	-2.0005	0.0738	-4.2244
	LEU-138	2.7608	0.061	2.7404	0.0548	3.4907	0.0703	3.5284	0.0792	3.4248	0.0533	3.18902		-1.6057	0.0831	-1.4716	0.0662	-3.4365	0.1001	-3.5685	0.1028	-2.3241	0.0727	-2.48128		-0.0186	0.0103	-0.0106	0.0125	-0.0055	0.0099	0.0141	0.0118	0.0199	0.0115	-0.00014		1.138	0.0508	1.2605	0.048	0.0484	0.0597	-0.022	0.0597	1.1185	0.0437	0.70868
	LEU-139	-0.8946	0.0599	0.0986	0.0433	1.6769	0.0968	-0.2555	0.1364	-1.0946	0.0478	-0.09384		1.0699	0.0386	0.3971	0.0242	-0.7607	0.0629	0.5713	0.107	0.9813	0.0401	0.45178		-0.0165	0.012	-0.0303	0.0129	0.0023	0.0115	-0.0425	0.0114	-0.031	0.0127	-0.0236		0.1574	0.0371	0.4676	0.0322	0.9203	0.0529	0.2842	0.0711	-0.1446	0.0313	0.33698
	ARG-140	-152.781	0.6403	-137.324	0.8637	-166.516	0.6589	-165.4	0.6691	-143.168	0.7699	-153.038		124.278	0.6834	115.704	0.8307	114.488	0.6428	112.677	0.6722	117.971	0.9405	117.024		-3.0999	0.0262	-3.119	0.0262	-2.4698	0.0204	-2.4272	0.0217	-2.4041	0.023	-2.704		-31.6067	0.4697	-24.7522	0.62	-54.4807	0.5038	-55.1419	0.5349	-27.5838	0.5524	-38.7131
	LYS-141	-150.495	0.8836	-128.264	2.0214	-184.468	1.6434	-176.385	2.4037	-116.38	2.1961	-151.198		111.8	1.3312	76.3471	3.2442	131.285	2.3826	119.717	3.5693	56.4966	3.3583	99.1291		-1.359	0.0189	-0.6354	0.037	-1.2079	0.0195	-1.1325	0.0325	-0.4645	0.0345	-0.95986		-39.9402	0.7795	-52.5458	1.4098	-54.2428	1.1507	-57.7409	1.4565	-60.4577	1.3264	-52.9855
	SER-142	-1.2087	0.0374	-0.5112	0.0553	-1.8537	0.0502	-1.772	0.0547	-1.05	0.0565	-1.27912		1.1619	0.0325	0.5494	0.0355	1.3499	0.0393	1.3174	0.0352	0.5059	0.0519	0.9769		0.0019	0.0051	-0.0014	0.0063	0.0087	0.0089	-0.0021	0.0074	0.0025	0.0088	0.00192		-0.0456	0.0329	0.0387	0.0456	-0.4957	0.0379	-0.4552	0.0413	-0.5432	0.047	-0.3002
	GLU-143	40.5747	0.2904	43.358	0.4322	61.9934	0.6161	63.7484	0.5125	50.3184	0.3934	51.9986		0.7433	0.1215	-1.3488	0.1482	-3.6703	0.1846	-4.237	0.1852	-3.7513	0.1883	-2.45282		0.0055	0.012	-0.0065	0.0104	-0.0014	0.0112	-0.0137	0.0101	0.012	0.0119	-0.00082		41.3228	0.2735	42.0158	0.3958	58.3119	0.5505	59.5083	0.4602	46.5907	0.3465	49.5499
	SER-144	-2.788	0.0244	-1.9539	0.0313	-2.3989	0.04	-2.8078	0.0351	-2.9002	0.0267	-2.56976		0.9275	0.0257	0.6304	0.0245	0.9299	0.03	0.7564	0.0292	0.8373	0.0313	0.8163		0.0138	0.0131	-0.0117	0.0134	-0.0197	0.0125	0.009	0.0089	-0.019	0.0083	-0.00552		-1.8469	0.0305	-1.3361	0.0326	-1.4889	0.0413	-2.0429	0.0346	-2.0835	0.0338	-1.75966
	TYR-145	-6.4975	0.0582	-4.4105	0.055	-8.2414	0.0573	-7.4302	0.0619	-6.7678	0.0599	-6.66948		2.8331	0.0581	1.7383	0.0582	4.1338	0.0576	3.2281	0.0565	3.4035	0.0612	3.06736		-0.2646	0.0087	-0.1319	0.008	-0.3427	0.0107	-0.2991	0.012	-0.2002	0.0095	-0.2477		-3.929	0.0438	-2.8008	0.0474	-4.4521	0.0554	-4.5005	0.0512	-3.5653	0.0452	-3.84954
	TRP-146	-26.0228	0.1876	-15.8005	0.3254	-30.0231	0.2314	-29.7572	0.2126	-29.9357	0.2112	-26.3079		8.5018	0.1114	7.6052	0.1931	11.9987	0.1409	9.9825	0.167	12.5229	0.1499	10.1222		-1.1976	0.0153	-1.3016	0.0294	-2.1325	0.0171	-2.2624	0.0179	-2.1374	0.0209	-1.8063		-18.7148	0.1785	-9.4862	0.3144	-20.1578	0.207	-22.0357	0.2071	-19.5569	0.1995	-17.9903
	LEU-147	-1.9914	0.0251	-1.2504	0.0501	-2.4052	0.0422	-1.8157	0.0459	-2.7358	0.039	-2.0397		-0.0761	0.0174	0.1936	0.0222	0.4115	0.024	-0.0337	0.0269	0.2198	0.0303	0.14302		0.0058	0.0063	0.0012	0.0042	-0.0014	0.0056	0.011	0.0053	0.0004	0.0105	0.0034		-2.0619	0.0252	-1.0571	0.0407	-1.9948	0.0353	-1.8384	0.0333	-2.5158	0.0388	-1.8936
	VAL-148	-3.7955	0.0523	-3.2493	0.0574	-4.9956	0.0604	-3.9196	0.0637	-4.4967	0.0494	-4.09134		0.4821	0.0346	0.8243	0.0357	1.4072	0.0501	0.7081	0.0609	1.1938	0.0346	0.9231		-0.0102	0.0112	0.0145	0.0088	0.0145	0.0094	-0.0193	0.0109	0.0228	0.0125	0.00446		-3.3228	0.0313	-2.4109	0.0371	-3.5786	0.0352	-3.2306	0.0371	-3.2796	0.0329	-3.1645
	GLY-149	-9.8937	0.0827	-9.4938	0.1211	-12.3717	0.1068	-10.1008	0.1265	-11.5189	0.104	-10.6758		3.7746	0.1184	4.5519	0.1071	5.9251	0.1174	2.8653	0.1155	5.7415	0.1068	4.57168		-0.5231	0.013	-0.5584	0.0123	-0.5887	0.013	-0.6992	0.014	-0.6418	0.0101	-0.60224		-6.6443	0.0985	-5.5102	0.1195	-7.0371	0.1007	-7.9333	0.1064	-6.4163	0.0974	-6.70824
	TYR-150	-12.0198	0.1872	-11.0192	0.2172	-14.9378	0.2688	-11.4281	0.2694	-17.9913	0.3558	-13.4792		1.3823	0.185	4.786	0.1797	5.3542	0.1881	2.8246	0.2128	8.1904	0.3242	4.5075		-1.0517	0.0149	-1.2278	0.0172	-1.2062	0.0184	-0.7827	0.0174	-1.5127	0.0231	-1.15622		-11.6871	0.1558	-7.4601	0.1491	-10.7993	0.1818	-9.3794	0.2105	-11.3107	0.2067	-10.1273
	LEU-151	-1.5627	0.0336	-0.9426	0.0421	-2.5484	0.0425	-1.7536	0.0433	-2.4704	0.0417	-1.85554		-0.683	0.0274	-0.624	0.027	-0.2188	0.0209	-0.4607	0.0249	0.0192	0.0271	-0.39346		0.0003	0.0124	-0.0022	0.0097	-0.0093	0.0129	-0.0172	0.0103	0.0171	0.0129	-0.00226		-2.244	0.026	-1.569	0.0286	-2.7749	0.0344	-2.2324	0.0332	-2.4315	0.0276	-2.25036
	LEU-152	-7.4031	0.1523	-6.8971	0.145	-8.3064	0.2614	-8.5983	0.241	-6.2577	0.1108	-7.49252		1.2214	0.1325	1.1591	0.114	1.6258	0.2456	4.5294	0.2499	0.0472	0.0777	1.71658		-0.3088	0.0158	-0.2606	0.0145	-0.3785	0.0148	-0.1616	0.0138	-0.273	0.019	-0.2765		-6.4806	0.0805	-6.0027	0.0711	-7.0515	0.0891	-4.2207	0.0648	-6.4884	0.0843	-6.04878
	ALA-153	-10.4829	0.1761	-9.42	0.1384	-9.8997	0.1316	-6.3602	0.1029	-9.9976	0.1528	-9.23208		1.4686	0.1609	1.244	0.1185	-0.3332	0.0782	0.3845	0.0501	1.2731	0.1731	0.8074		-1.1768	0.0168	-1.4349	0.014	-0.7124	0.0153	-0.3359	0.014	-1.0478	0.0197	-0.94156		-10.1885	0.1145	-9.6146	0.1404	-10.9445	0.1159	-6.3101	0.1118	-9.7656	0.1302	-9.36466
	GLN-154	-22.5287	0.2314	-7.3168	0.2545	-20.3149	0.3218	-24.7749	0.3679	-7.1245	0.2215	-16.412		25.9221	0.2787	3.6602	0.3618	31.4758	0.3876	21.1267	0.2775	3.4476	0.2436	17.1265		-1.5181	0.0149	-0.6555	0.0188	-2.0294	0.0203	-1.7976	0.0153	-0.2488	0.0136	-1.24988		1.8736	0.2575	-4.3063	0.1787	9.1396	0.2421	-5.4426	0.3355	-3.9373	0.189	-0.5346
	SER-155	-7.6446	0.1329	-6.8569	0.0984	0.5255	0.086	-6.248	0.1947	-2.4109	0.2602	-4.52698		10.8446	0.1585	9.0249	0.1177	0.77	0.0981	8.7872	0.2369	2.5544	0.2964	6.39622		-0.5515	0.0116	-0.4238	0.009	-0.0806	0.0077	-0.4385	0.0129	-0.144	0.0154	-0.32768		2.6582	0.1134	1.7438	0.1192	1.2161	0.1086	2.1101	0.1299	-0.0154	0.1142	1.54256
	THR-156	-3.1316	0.056	-3.987	0.0873	-1.9353	0.0554	-2.3226	0.0594	1.295	0.0353	-2.0163		0.7232	0.0383	1.2493	0.0458	-0.1486	0.0193	0.3733	0.0268	-0.5003	0.0215	0.33938		0	0.0127	0.0179	0.0129	-0.0077	0.0132	-0.003	0.0105	0.0015	0.0123	0.00174		-2.4104	0.0369	-2.7228	0.0565	-2.0924	0.0459	-1.9556	0.0427	0.7955	0.0321	-1.67714
	SER-157	-2.5062	0.2589	-2.7675	0.1735	2.0989	0.1578	-0.4843	0.1594	1.6996	0.0761	-0.3919		2.0727	0.1325	2.495	0.1278	0.0086	0.0621	0.4527	0.0678	-0.2397	0.0413	0.95786		-0.134	0.0131	-0.0738	0.0155	0.0091	0.0077	-0.0384	0.0144	-0.0198	0.0099	-0.05138		-0.5808	0.219	-0.3412	0.1579	2.1163	0.1591	-0.0693	0.1352	1.4373	0.0812	0.51246
	GLY-158	-1.4199	0.1058	-2.737	0.0572	1.0509	0.0254	-3.0816	0.0694	0.5195	0.0401	-1.13362		1.0015	0.0744	1.9954	0.0714	-0.0858	0.0254	1.6102	0.0703	0.0035	0.0327	0.90496		-0.0337	0.0067	-0.0546	0.0059	-0.001	0.0057	-0.0268	0.0049	0.0003	0.0034	-0.02316		-0.4494	0.0734	-0.7912	0.0731	0.9672	0.0328	-1.5009	0.0577	0.5225	0.0405	-0.25036
	ASN-159	-1.1966	0.0852	-1.4934	0.0626	-2.0077	0.0794	-0.5273	0.1025	-1.4916	0.0828	-1.34332		0.5468	0.0809	-0.0326	0.0579	-0.0282	0.0556	-0.8329	0.0683	-0.0187	0.0578	-0.07312		-0.0041	0.0044	-0.0025	0.0054	-0.006	0.0037	-0.0036	0.005	0.0046	0.0089	-0.00232		-0.6511	0.0853	-1.5216	0.0832	-2.0369	0.0991	-1.3612	0.0926	-1.4992	0.1066	-1.414
	THR-160	0.9538	0.0155	1.0486	0.0263	1.1794	0.0186	1.7725	0.0253	0.7692	0.0173	1.1447		0.1554	0.0328	-0.0538	0.0329	0.0177	0.0374	-0.4024	0.0275	0.0222	0.0415	-0.05218		0.0009	0.0061	0.0025	0.0055	-0.008	0.0056	0.0034	0.0044	-0.0046	0.0052	-0.00116		1.1111	0.0369	1.0001	0.0404	1.1871	0.0421	1.3715	0.0316	0.7869	0.0424	1.09134
	MET-161	1.2419	0.0177	1.2868	0.0284	1.5283	0.0199	1.3668	0.0311	0.8035	0.032	1.24546		-0.132	0.0158	-0.1314	0.0164	-0.1036	0.0153	-0.2274	0.0157	-0.0828	0.0331	-0.13544		-0.0124	0.009	-0.0054	0.0094	0.0078	0.0083	-0.0169	0.015	-0.0233	0.0151	-0.01004		1.0971	0.0241	1.1492	0.0316	1.4322	0.0247	1.1236	0.0333	0.7008	0.05	1.10058
	ARG-162	-9.0761	0.1269	-19.6788	0.3755	-16.5523	0.2716	-22.5487	0.3168	-11.4671	0.1822	-15.8646		0.7428	0.0652	0.3653	0.0613	-0.1503	0.0675	-0.0933	0.0542	-0.2028	0.0822	0.13234		-0.0011	0.0048	-0.011	0.0044	0.0014	0.0028	0.0056	0.0039	-0.0038	0.0088	-0.00178		-8.3351	0.1377	-19.3227	0.3798	-16.7013	0.2665	-22.6344	0.3339	-11.6698	0.1955	-15.7327
	MET-163	0.8321	0.0265	1.0252	0.0468	1.3537	0.0507	1.8182	0.0603	0.65	0.0375	1.13584		0.0511	0.0143	-0.082	0.0127	-0.0614	0.0158	-0.3003	0.0159	-0.0714	0.0149	-0.0928		0.0177	0.0061	-0.0003	0.0053	-0.0055	0.0061	0.0111	0.0063	-0.0097	0.0118	0.00266		0.9015	0.0314	0.9411	0.0474	1.2864	0.054	1.5274	0.0535	0.5697	0.0418	1.04522
	LEU-164	0.9794	0.0093	1.0399	0.0211	1.5797	0.0132	1.6839	0.024	0.2284	0.0084	1.10226		-0.0243	0.0087	-0.0535	0.0067	-0.0974	0.0058	-0.1529	0.0095	-0.0061	0.0114	-0.06684		-0.0098	0.0101	-0.0029	0.0088	0.0051	0.0083	-0.0043	0.0098	0.0049	0.011	-0.0014		0.9459	0.0135	0.9833	0.0204	1.4879	0.0158	1.5277	0.0211	0.2262	0.0176	1.0342
	GLY-165	0.6914	0.0104	0.6559	0.0234	1.1417	0.0189	0.9807	0.029	0.5483	0.0097	0.8036		0.0076	0.0116	0.0005	0.0129	-0.0685	0.0085	-0.0459	0.0137	-0.0111	0.0092	-0.02348		-0.0062	0.011	0.006	0.0097	-0.0167	0.0079	0.0131	0.0153	0.0084	0.013	0.00092		0.6936	0.0171	0.6604	0.0275	1.0569	0.0218	0.9467	0.0314	0.5452	0.0164	0.78056
	GLU-166	13.6872	0.1214	24.5546	0.3904	23.7568	0.2365	32.3522	0.3783	20.4116	0.2747	22.9525		1.4426	0.1374	0.6889	0.1214	0.3305	0.1223	-0.9285	0.1025	-0.4908	0.1499	0.20854		-0.0005	0.0067	0.0023	0.0084	-0.0088	0.006	-0.0067	0.0059	-0.0194	0.012	-0.00662		15.137	0.1715	25.2449	0.4125	24.0687	0.2614	31.4368	0.3731	19.9107	0.3253	23.1596
	ASP-167	18.1452	0.2448	34.7079	0.6139	34.079	0.5434	45.2503	0.6404	22.5512	0.3418	30.9467		0.5093	0.1059	0.2449	0.0998	0.1884	0.0948	-1.7854	0.1165	-0.6167	0.1307	-0.2919		-0.0046	0.0057	0.0029	0.0055	-0.0019	0.0042	-0.0039	0.0048	-0.0037	0.012	-0.00224		18.6513	0.2716	34.9543	0.6181	34.254	0.5665	43.4362	0.6035	21.9512	0.3603	30.6494
	TYR-168	0.8448	0.0604	1.1102	0.0631	1.4683	0.0842	3.0796	0.0878	-0.1704	0.0321	1.2665		0.426	0.0451	0.1208	0.0407	-0.0164	0.0393	-1.0172	0.0728	-0.1902	0.0281	-0.1354		0.0046	0.0081	0.0007	0.0069	-0.0047	0.0069	0.0092	0.0113	0.0068	0.0131	0.00332		1.2752	0.0699	1.2312	0.0697	1.45	0.0918	2.0749	0.09	-0.3553	0.0303	1.1352
	GLY-169	0.4681	0.0122	0.3224	0.0193	0.8455	0.03	0.9086	0.0384	0.5189	0.0096	0.6127		0.0637	0.0169	0.0464	0.014	-0.0255	0.015	0.001	0.0149	-0.0737	0.0057	0.00238		-0.0115	0.0096	-0.0073	0.0108	0.0105	0.0084	-0.0034	0.009	-0.0049	0.0059	-0.00332		0.5208	0.0219	0.3619	0.0248	0.831	0.0352	0.9062	0.0368	0.4406	0.0124	0.6121
	VAL-170	0.2864	0.0118	0.1067	0.015	0.5843	0.0251	0.6861	0.0374	1.0351	0.022	0.53972		0.2205	0.0206	0.1563	0.0205	0.0105	0.0173	0.0722	0.0174	-0.0784	0.0175	0.07622		-0.0001	0.009	-0.0018	0.008	-0.0086	0.0086	-0.0046	0.0031	-0.0052	0.0108	-0.00406		0.5071	0.0245	0.2607	0.0244	0.5873	0.0306	0.7558	0.0407	0.9512	0.0295	0.61242
	SER-171	0.3909	0.0241	0.2562	0.0271	0.9478	0.0375	1.0898	0.0559	0.9838	0.0371	0.7337		0.1826	0.0272	0.0712	0.0339	-0.0289	0.0286	-0.2378	0.0304	-0.0769	0.0414	-0.01796		-0.0048	0.002	0.0022	0.002	0.0012	0.0019	-0.0009	0.0018	0.0086	0.0052	0.00126		0.5688	0.0392	0.3281	0.0421	0.9192	0.0467	0.8476	0.0552	0.9178	0.0505	0.7163
	TYR-172	0.5763	0.0308	-0.0421	0.0357	0.7078	0.0649	0.4627	0.1338	0.7335	0.0442	0.48764		0.3054	0.0427	0.0547	0.0498	0.0044	0.05	-0.5947	0.0551	-0.2676	0.0558	-0.09956		-0.0103	0.005	0.0062	0.0042	0.0037	0.0045	-0.0065	0.0037	-0.0039	0.0076	-0.00216		0.87	0.0496	0.0187	0.06	0.7165	0.085	-0.1387	0.1342	0.4585	0.0704	0.385
	THR-173	0.6155	0.0291	0.1113	0.0594	0.9758	0.0573	0.0068	0.1489	0.8091	0.0412	0.5037		0.0898	0.0371	-0.1506	0.0446	-0.2775	0.0397	-0.9793	0.0596	-0.5962	0.0448	-0.38276		-0.0011	0.0044	0.0015	0.0045	-0.0052	0.0047	-0.0018	0.004	0.0124	0.0049	0.00116		0.7037	0.0469	-0.0421	0.0768	0.694	0.0695	-0.9712	0.1501	0.2279	0.0563	0.12246
	HIS-174	2.5061	0.0661	0.8091	0.1267	4.0032	0.1235	4.6943	0.1905	2.235	0.0706	2.84954		-0.2142	0.0449	-0.5061	0.0465	-0.4102	0.0479	-2.2383	0.0995	-1.0593	0.0596	-0.88562		-0.0037	0.0041	-0.0027	0.0029	0.0039	0.0031	-0.003	0.0045	0.0179	0.0084	0.00248		2.2875	0.0737	0.3018	0.1305	3.5976	0.1238	2.4556	0.1569	1.1899	0.0777	1.96648
	PHE-175	0.5633	0.0182	0.1962	0.0265	0.6086	0.0344	-0.1994	0.0685	0.1783	0.0287	0.2694		-0.2332	0.0104	-0.2628	0.0167	-0.2847	0.0097	-0.3873	0.0162	-0.3906	0.0154	-0.31172		0.0031	0.0072	-0.0135	0.0071	0.0148	0.0068	-0.0016	0.007	-0.0024	0.0109	8e-05		0.3329	0.0179	-0.0798	0.0223	0.3396	0.0346	-0.59	0.0629	-0.2149	0.0313	-0.04244
	ARG-176	-34.3401	0.2641	-41.6426	0.6242	-66.0798	1.0704	-83.5401	1.5877	-52.268	0.6671	-55.5741		0.6904	0.0578	0.6749	0.0619	0.1357	0.1072	3.3489	0.6975	0.4109	0.0782	1.05216		0.0063	0.0112	0.0015	0.0095	-0.0011	0.009	-0.0379	0.0119	0.0099	0.0101	-0.00426		-33.6448	0.2491	-40.9678	0.6005	-65.9505	1.0391	-80.1916	1.1621	-51.8327	0.6762	-54.5175
	ARG-177	-46.1987	1.0556	-79.3923	1.7433	-90.7361	1.5602	-127.57	2.0825	-65.4668	1.6188	-81.8727		6.1421	0.8702	24.2488	1.2429	16.1576	1.4455	57.3069	2.1819	36.5507	1.6404	28.0812		-0.1318	0.0216	-0.5309	0.0312	-0.3385	0.0332	-1.0855	0.0432	-0.9928	0.039	-0.6159		-40.1589	0.5791	-55.6733	0.8787	-74.99	1.269	-71.2927	1.4818	-29.9666	0.7345	-54.4163
	LEU-178	-0.2274	0.0403	-0.6599	0.0408	-0.0088	0.0607	-1.5388	0.0605	-0.5855	0.0373	-0.60408		-0.3444	0.023	-0.0878	0.0259	-0.5279	0.0225	-0.0041	0.0341	-0.3308	0.0241	-0.259		-0.0014	0.0136	0.0026	0.0115	0.0017	0.0126	-0.0088	0.011	-0.0149	0.015	-0.00416		-0.5728	0.0335	-0.7453	0.0281	-0.5354	0.0492	-1.5529	0.0399	-0.9313	0.0333	-0.86754
	CYS-179	0.0368	0.0399	-0.5778	0.0299	0.2478	0.0514	0.2569	0.0645	0.4316	0.0315	0.07906		0.2386	0.0178	0.2019	0.0144	0.1537	0.0153	0.5319	0.0218	0.1006	0.0283	0.24534		0.0056	0.0058	-0.0111	0.0062	0.0049	0.0063	-0.0102	0.0073	0.0047	0.0079	-0.00122		0.2811	0.0426	-0.3875	0.0289	0.4064	0.0539	0.7786	0.0576	0.5364	0.0363	0.323
	SER-180	-2.1096	0.0526	-1.3229	0.0617	-2.8064	0.1587	-1.6373	0.1868	-3.4796	0.2041	-2.27116		1.2835	0.0433	0.4048	0.0568	1.3125	0.1382	0.5706	0.1458	1.9319	0.1597	1.10066		-0.0003	0.0024	-0.0046	0.0019	-0.0604	0.0074	-0.0376	0.0061	-0.1031	0.0112	-0.0412		-0.824	0.0548	-0.9221	0.0554	-1.5649	0.1265	-1.0998	0.125	-1.6424	0.1258	-1.21064
	ARG-181	-62.7882	0.5218	-71.3382	0.7601	-111.964	1.5209	-118.689	1.1697	-85.8634	0.8392	-90.1287		3.698	0.2136	12.8711	0.6439	35.2731	1.3929	43.1286	1.0333	34.0815	0.9051	25.8105		0.0166	0.0123	-0.1446	0.0155	-0.2807	0.021	-0.4756	0.0193	-0.4088	0.0223	-0.25862		-59.0737	0.4155	-58.6021	0.5906	-76.9399	0.7981	-76.0868	0.5986	-52.1828	0.3958	-64.5771
	ALA-182	-0.0784	0.0251	0.0692	0.0239	0.2028	0.042	0.7967	0.038	0.0704	0.023	0.21214		0.0068	0.0133	0.0154	0.0109	0.0026	0.0092	-0.1175	0.0089	-0.0186	0.0107	-0.02226		0.0089	0.0046	-0.0012	0.0021	-0.0051	0.0042	-0.0025	0.0032	-0.0157	0.0071	-0.00312		-0.0621	0.0228	0.0836	0.0215	0.2011	0.0429	0.6763	0.0353	0.0364	0.0227	0.18706
	LEU-183	-0.4873	0.0129	-0.4544	0.0132	-0.8117	0.021	-1.0501	0.0182	-0.7789	0.015	-0.71648		0.3073	0.0313	0.1856	0.0293	0.0588	0.0316	-0.0094	0.0293	0.004	0.0392	0.10926		0.0087	0.0099	-0.0056	0.0083	0.0064	0.0099	0.0006	0.0049	0.0041	0.0079	0.00284		-0.1699	0.0374	-0.2763	0.0317	-0.7451	0.0374	-1.0594	0.0364	-0.7714	0.0427	-0.60442
	GLY-184	0.0599	0.0138	-0.0439	0.0139	0.0342	0.0195	0.697	0.0185	0.3559	0.0121	0.22062		0.172	0.022	0.0764	0.0185	0.0344	0.0161	-0.1398	0.0082	-0.0988	0.0093	0.00884		-0.0034	0.0056	-0.007	0.0048	0.0014	0.004	0.0048	0.0036	0.0143	0.0061	0.00202		0.2294	0.0256	0.0256	0.0208	0.0708	0.0225	0.5624	0.0149	0.2716	0.0135	0.23196
	GLY-185	0.6009	0.0125	0.7378	0.0132	1.0724	0.0166	1.458	0.0311	0.1539	0.0313	0.8046		0.0631	0.0208	-0.0006	0.0188	-0.1114	0.0186	-0.3521	0.012	-0.0909	0.0181	-0.09838		0.0079	0.0044	-0.0019	0.0039	0.0003	0.0031	0.0057	0.0057	-0.0175	0.0098	-0.0011		0.6719	0.0212	0.7356	0.0223	0.9618	0.0231	1.1118	0.0271	0.0469	0.0328	0.7056
	LYS-186	-17.6249	0.1036	-22.3275	0.3085	-28.0153	0.2565	-42.8127	0.4415	-31.1458	0.3077	-28.3852		1.1394	0.1251	0.3281	0.1052	0.0334	0.118	0.5028	0.1021	0.4266	0.1257	0.48606		-0.0043	0.0063	0.0019	0.0024	0.0054	0.005	-0.0023	0.0053	0.0045	0.0115	0.00104		-16.4818	0.1581	-22.0115	0.3451	-27.9782	0.2905	-42.3112	0.4584	-30.7211	0.3251	-27.9008
	ALA-187	-0.4511	0.0117	-0.3535	0.0158	-0.7069	0.0161	-0.9244	0.0152	-0.3815	0.0112	-0.56348		0.0098	0.0143	-0.0057	0.0152	0.1274	0.0122	0.0387	0.013	0.0476	0.0098	0.04356		-0.004	0.0057	-0.0046	0.0093	0.009	0.0061	0.0082	0.0098	0.0045	0.0042	0.00262		-0.4453	0.0178	-0.3641	0.0206	-0.5706	0.0211	-0.8776	0.0208	-0.3296	0.0146	-0.51744
	LYS-188	-15.8002	0.1154	-23.0308	0.3306	-25.5436	0.2142	-27.5992	0.2937	-16.9657	0.2465	-21.7879		0.9757	0.1092	0.6451	0.104	0.1691	0.1001	0.1002	0.0955	-0.5267	0.1179	0.27268		-0.0127	0.0128	-0.0095	0.0146	-0.0343	0.0154	0.0245	0.0201	-0.0232	0.0173	-0.01104		-14.8362	0.1491	-22.3871	0.3403	-25.419	0.2277	-27.4752	0.2937	-17.5096	0.2744	-21.5254
[truncated: 142 more rows]
