# Supplementary material for: The interaction of InvF-RNAP is mediated by the chaperone SicA in Salmonella sp: an in silico prediction
Source: PeerJ. 2024 Mar 25;12:e17069. doi: 10.7717/peerj.17069 (PMC10977090; doi:10.7717/peerj.17069)
Supplement: Supplemental Information 3 — All the results obtained from molecular dynamics simulations and PBSA. [file peerj-12-17069-s003.xlsx]

## Sheet: TPR1
Protein	#Residues	MM_Energy(+/-)dev/error													Polar_Energy(+/-)dev/error													Apolar_Energy(+/-)dev/error													Total_Energy(+/-)dev/error
		Frame1		Frame2		Frame3		Frame4		Frame5		Average			Frame1		Frame2		Frame3		Frame4		Frame5		Average			Frame1		Frame2		Frame3		Frame4		Frame5		Average			Frame1		Frame2		Frame3		Frame4		Frame5
InvF	MET-1	-25.787	0.0483	-29.3092	0.0708	-26.7592	0.0571	-32.231	0.0793	-26.4698	0.0641	-28.1112			0.3858	0.103	0.6531	0.1304	0.5553	0.1254	0.4373	0.128	-0.0674	0.0976	0.39282			-0.0143	0.0135	0.009	0.0129	0.0207	0.0114	-0.0269	0.0101	0.0083	0.0137	-0.00064			-25.4132	0.1128	-28.6449	0.1577	-26.1767	0.1387	-31.8218	0.1497	-26.5299
	LEU-2	0.0214	0.0036	0.0752	0.0064	0.1473	0.0045	0.0516	0.0065	-0.0109	0.0048	0.05692			0.2897	0.0341	0.0482	0.0126	0.0751	0.0199	0.0192	0.0169	0.0257	0.0204	0.09158			-0.0218	0.0091	0.0052	0.0058	0.0093	0.0084	-0.0119	0.0109	0.003	0.0097	-0.00324			0.2885	0.0362	0.1286	0.0161	0.2322	0.0231	0.0592	0.0207	0.0183
	ASN-3	0.0569	0.0099	-0.4292	0.0188	-0.0111	0.017	0.0728	0.0176	-0.0354	0.0187	-0.0692			0.2324	0.035	0.5998	0.0695	0.56	0.0688	0.3363	0.0676	0.0808	0.0546	0.36186			0.0086	0.0078	0.0159	0.01	-0.0164	0.0094	-0.0085	0.007	-0.0114	0.0116	-0.00236			0.296	0.0374	0.1889	0.0754	0.5348	0.0762	0.4039	0.0662	0.035
	THR-4	-0.0927	0.0055	-0.0566	0.0127	0.088	0.0081	0.032	0.0094	0.0249	0.0052	-0.00088			0.1548	0.0384	0.3018	0.0496	0.2787	0.0484	0.14	0.0422	0.0519	0.0271	0.18544			0.0027	0.0072	0.0109	0.0072	0.0056	0.0067	0.0015	0.0101	0.0033	0.0055	0.0048			0.0659	0.039	0.2543	0.0491	0.3724	0.0478	0.1746	0.0443	0.0797
	GLN-5	-0.5541	0.0179	-0.4146	0.0298	0.0839	0.0218	-0.3115	0.0108	-0.2814	0.0143	-0.29554			0.8122	0.0704	0.5022	0.0701	0.6162	0.0738	0.131	0.0343	-0.0224	0.0636	0.40784			0.0026	0.01	0.001	0.0098	0.0113	0.0083	0.011	0.0088	0.0068	0.0095	0.00654			0.2642	0.0739	0.0881	0.0834	0.7101	0.0725	-0.1683	0.0393	-0.3015
	GLU-6	25.827	0.0494	27.9843	0.0613	25.6827	0.0503	25.5061	0.0897	26.0461	0.0649	26.2092			0.9641	0.137	0.5089	0.1171	0.3697	0.1131	0.7336	0.1301	0.1162	0.1144	0.5385			-0.0024	0.0071	0.0081	0.0078	0.0101	0.0066	-0.0085	0.0096	-0.0076	0.007	-6e-05			26.7869	0.1485	28.4953	0.1209	26.0614	0.1252	26.2304	0.1573	26.1532
	VAL-7	-0.0898	0.003	-0.0847	0.0039	-0.0651	0.0034	-0.0823	0.0025	-0.077	0.0024	-0.07978			0.0799	0.0272	0.0561	0.0339	0.0812	0.0314	-0.001	0.032	-0.0218	0.0251	0.03888			0.0137	0.0115	-0.012	0.0158	-0.003	0.0147	0.0275	0.0168	0.0262	0.015	0.01048			0.0039	0.0297	-0.0414	0.0358	0.0124	0.0356	-0.0564	0.0355	-0.0723
	LEU-8	-0.0892	0.0022	-0.1041	0.0026	-0.044	0.0017	-0.0402	0.002	-0.0118	0.0016	-0.05786			0.018	0.0048	0.0057	0.0066	-0.0021	0.005	-0.0012	0.0052	-0.0072	0.0056	0.00264			0.0047	0.0165	0.0176	0.0143	0.0174	0.0127	0.0313	0.0147	0.0351	0.0173	0.02122			-0.0663	0.017	-0.0802	0.0164	-0.0287	0.0139	-0.0102	0.0157	0.015
	LYS-9	-22.6781	0.0431	-23.8726	0.0509	-22.9403	0.0505	-23.0149	0.0587	-24.2175	0.0628	-23.3447			0.7986	0.126	0.8216	0.1423	0.4207	0.1149	0.2515	0.1349	0.0705	0.107	0.47258			0.0201	0.0118	-0.0045	0.0115	-0.0132	0.0132	-0.0081	0.0135	0.0245	0.0134	0.00376			-21.8531	0.1358	-23.0607	0.154	-22.5326	0.1272	-22.7721	0.1427	-24.1237
	GLU-10	21.6798	0.0433	22.7872	0.0384	22.3115	0.0575	22.4068	0.0667	24.1071	0.0707	22.6585			1.0811	0.1127	0.8454	0.1315	0.0428	0.136	0.359	0.1219	-0.2653	0.1314	0.4126			-0.0003	0.008	0.0059	0.0115	-0.0005	0.0064	0.0006	0.0085	-0.0029	0.0063	0.00056			22.7665	0.1192	23.6287	0.133	22.3655	0.1504	22.7645	0.1421	23.838
	GLY-11	-0.006	0.0032	-0.0084	0.0037	-0.0682	0.0032	-0.0329	0.004	0.0041	0.0031	-0.02228			0.2152	0.0274	0.2244	0.0298	0.0889	0.021	0.0456	0.0252	0.0326	0.0218	0.12134			0.01	0.0057	0.0112	0.0058	0.0058	0.0074	0.001	0.0085	-0.0249	0.0087	0.00062			0.2201	0.0289	0.2276	0.0314	0.0256	0.023	0.0122	0.0269	0.0124
	GLU-12	21.5045	0.038	22.8615	0.0506	22.5673	0.0594	21.8358	0.0686	22.4655	0.0598	22.2469			1.4489	0.136	1.3571	0.1403	0.8523	0.1354	0.4587	0.1506	-0.0229	0.1349	0.81882			0.0045	0.0046	0.002	0.006	-0.0045	0.0076	-0.0001	0.0083	-0.0007	0.0061	0.00024			22.9672	0.1414	24.2102	0.1477	23.4131	0.1454	22.2961	0.1644	22.4447
	LYS-13	-21.3784	0.0488	-22.6296	0.0573	-22.0375	0.0648	-21.8981	0.0888	-23.2565	0.0875	-22.24			0.9168	0.1182	0.57	0.1079	0.4983	0.1196	0.568	0.117	-0.0526	0.097	0.5001			0.0116	0.0231	0.0323	0.0193	0.0085	0.0202	-0.0187	0.0194	0.0261	0.0182	0.01196			-20.4551	0.1309	-22.0253	0.1268	-21.5282	0.1367	-21.3485	0.1522	-23.2882
	ARG-14	-22.6129	0.0381	-24.1598	0.0574	-23.2731	0.0545	-23.0743	0.0699	-23.5206	0.0635	-23.3281			0.2018	0.0467	0.3442	0.0451	0.1478	0.0563	0.1206	0.0595	-0.0156	0.0465	0.15976			0.0257	0.0099	-0.0029	0.0097	0.0048	0.012	0.0022	0.0098	-0.0116	0.0092	0.00364			-22.3843	0.0654	-23.8195	0.0737	-23.1152	0.0785	-22.9548	0.0908	-23.5494
	LYS-15	-24.1641	0.066	-25.749	0.0868	-23.929	0.0748	-23.1333	0.0806	-24.2685	0.0793	-24.2488			1.1849	0.1181	0.9267	0.1514	0.6951	0.1409	0.3121	0.1466	-0.0367	0.1113	0.61642			-0.0019	0.0173	-0.0039	0.0181	0.0148	0.0181	-0.0184	0.0183	0.0137	0.0155	0.00086			-22.976	0.1457	-24.8303	0.1827	-23.214	0.1602	-22.843	0.165	-24.2907
	ILE-16	0.0736	0.0054	0.2437	0.0064	0.1641	0.0045	0.127	0.0054	0.1606	0.0029	0.1538			0.0494	0.0115	0.0388	0.0145	0.0726	0.0127	0.0592	0.0143	0.0062	0.0022	0.04524			-0.0273	0.0121	0.0082	0.0144	0.0231	0.0134	-0.0205	0.013	0.0012	0.0122	-0.00306			0.0955	0.0166	0.2904	0.0209	0.2601	0.0193	0.1663	0.0195	0.1681
	ARG-17	-27.8814	0.0899	-29.1241	0.0891	-26.0178	0.1061	-25.1048	0.0892	-25.136	0.0853	-26.6528			0.5346	0.0683	0.5263	0.0667	0.216	0.0584	0.2871	0.0689	-0.05	0.0583	0.3028			-0.0337	0.0114	0.0015	0.0086	0.0202	0.009	-0.0054	0.0096	-0.0112	0.0098	-0.00572			-27.3803	0.1121	-28.5924	0.1091	-25.7781	0.1182	-24.8202	0.1155	-25.2003
	SER-18	0.0418	0.0051	0.0518	0.0094	0.0283	0.006	0.027	0.0033	0.06	0.0033	0.04178			0.0318	0.0167	0.0641	0.0281	-0.015	0.0289	-0.0683	0.0302	0.0026	0.0142	0.00304			-0.0062	0.0057	0.0085	0.0056	-0.0001	0.0049	-0.0216	0.0056	-0.0015	0.0036	-0.00418			0.0674	0.019	0.125	0.0282	0.0144	0.0283	-0.0636	0.03	0.0615
	PRO-19	0.146	0.0085	0.1821	0.01	0.1543	0.0072	0.079	0.0068	0.099	0.006	0.13208			0.0865	0.0192	0.1144	0.0196	0.1134	0.0196	0.0904	0.0228	0.0019	0.0122	0.08132			-0.0223	0.0078	0.0126	0.0069	-0.0048	0.0055	-0.0024	0.0052	-0.0017	0.0092	-0.00372			0.2108	0.0208	0.3099	0.0223	0.2627	0.0206	0.1667	0.0246	0.0991
	GLU-20	34.3142	0.0779	37.6155	0.1052	32.8817	0.0976	31.2156	0.0945	31.2847	0.0921	33.4623			0.8618	0.1284	0.9665	0.1319	0.9644	0.1273	0.8308	0.1574	0.2249	0.1077	0.76968			0.004	0.0109	-0.0163	0.0119	0.0295	0.0105	-0.0124	0.0093	-0.0044	0.0096	8e-05			35.1735	0.1527	38.5626	0.1552	33.8772	0.1558	32.0371	0.185	31.5078
	ALA-21	-0.1987	0.0035	-0.2355	0.0038	-0.1791	0.0035	-0.1154	0.0033	-0.1171	0.0027	-0.16916			0.0054	0.0029	0.0076	0.0035	0.0011	0.0036	-0.0145	0.004	-0.0156	0.002	-0.0032			-0.0343	0.0151	-0.0419	0.0139	0.0034	0.015	-0.045	0.0131	-0.0052	0.0096	-0.0246			-0.2274	0.0154	-0.2697	0.0138	-0.1754	0.0162	-0.1752	0.0148	-0.138
	TRP-22	0.043	0.0055	0.0098	0.0078	-0.0432	0.0062	0.0447	0.0052	-0.3575	0.0078	-0.06064			0.1432	0.0131	0.1128	0.0139	0.1268	0.0149	0.1306	0.0151	0.0894	0.0097	0.12056			-0.0061	0.0101	-0.0066	0.0112	0.0168	0.01	-0.0013	0.0114	-0.0087	0.0098	-0.00118			0.1804	0.0172	0.1162	0.0185	0.0999	0.0191	0.1745	0.0209	-0.2769
	PHE-23	-0.0542	0.0044	-0.0846	0.0056	-0.0384	0.0047	-0.037	0.0042	-0.0084	0.0048	-0.04452			0.0033	0.0028	0.0081	0.0029	-0.009	0.0035	-0.0165	0.0048	-0.0239	0.0035	-0.0076			0.0012	0.0072	-0.0135	0.0088	0.0189	0.0093	0.0125	0.0086	0.02	0.0075	0.00782			-0.0501	0.0092	-0.0895	0.0112	-0.028	0.011	-0.0411	0.0106	-0.0128
	ILE-24	-0.0128	0.0044	-0.0177	0.0047	-0.0143	0.0034	-0.0037	0.0034	-0.0181	0.0032	-0.01332			0.0044	0.004	0.0058	0.0032	0.0243	0.0062	0.0104	0.0035	-0.0006	0.0024	0.00886			-0.058	0.0166	-0.0447	0.0167	-0.0092	0.0201	0.0052	0.0181	0.0671	0.0184	-0.00792			-0.067	0.0163	-0.0567	0.0186	0.0006	0.0204	0.0122	0.0182	0.0482
	GLN-25	0.0641	0.0159	0.1243	0.0217	0.0601	0.0097	0.0131	0.0097	-0.0753	0.0114	0.03726			0.3042	0.0325	0.2708	0.0351	0.1905	0.0393	0.131	0.0401	0.0622	0.0346	0.19174			-0.0043	0.0098	0.018	0.0098	0.0064	0.008	0.0089	0.0097	-0.0021	0.011	0.00538			0.3637	0.0382	0.4103	0.0416	0.2559	0.0399	0.1529	0.0432	-0.0159
	THR-26	0.2613	0.007	0.3004	0.0069	0.2464	0.0048	0.2306	0.0047	0.1596	0.0058	0.23966			0.0046	0.0288	-0.0127	0.0318	-0.0314	0.0294	-0.0936	0.037	0.0118	0.0304	-0.02426			0.0279	0.0135	-0.0218	0.0123	0.0048	0.0183	0.0009	0.0143	0.0164	0.0121	0.00564			0.2919	0.0307	0.2672	0.0354	0.2217	0.0358	0.1377	0.0396	0.1902
	CYS-27	0.2764	0.0047	0.0995	0.0125	0.1719	0.0037	0.2352	0.004	0.2082	0.0039	0.19824			0.2648	0.02	0.1788	0.0192	0.045	0.0265	0.1336	0.0223	0.0297	0.0229	0.13038			-0.0049	0.0114	-0.0113	0.0109	0.0056	0.0092	-0.0022	0.0096	0.0043	0.0075	-0.0017			0.5371	0.0237	0.2661	0.0252	0.2229	0.0292	0.3664	0.0232	0.2423
	SER-28	0.0356	0.0079	-0.0552	0.0122	-0.1178	0.0041	0.0469	0.0067	0.0488	0.0053	-0.00834			0.4017	0.0408	0.3702	0.0494	0.3444	0.0455	0.1204	0.0397	0.0624	0.0477	0.25982			0.0031	0.0089	-0.004	0.0082	0.0068	0.006	-0.0043	0.0078	-0.0004	0.0056	0.00024			0.4388	0.0414	0.3107	0.0518	0.2346	0.046	0.1626	0.0417	0.1121
	ALA-29	-0.0321	0.0067	-0.0617	0.0071	0.0995	0.0021	0.0197	0.0057	0.0649	0.0068	0.01806			0.3012	0.0295	0.3112	0.0306	-0.016	0.0132	0.1641	0.0339	0.0282	0.0333	0.15774			0.0038	0.0099	-0.0223	0.0075	0.0033	0.0151	0.0068	0.0113	0.0027	0.011	-0.00114			0.275	0.0327	0.2269	0.0367	0.0866	0.0199	0.1899	0.0365	0.0969
	GLN-30	0.079	0.0133	0.1086	0.0135	0.0504	0.0092	-0.0215	0.0087	-0.0647	0.0119	0.03036			0.7089	0.0672	0.3945	0.0808	0.4666	0.0636	0.3705	0.063	0.0765	0.0657	0.4034			-0.0164	0.0109	-0.0109	0.0084	0.0021	0.0086	-0.0098	0.0085	-0.0229	0.0083	-0.01158			0.7706	0.0729	0.4899	0.0835	0.518	0.0633	0.3402	0.0651	-0.0098
	LYS-31	-23.4455	0.0984	-23.3311	0.091	-25.1416	0.1064	-25.1677	0.1428	-29.1572	0.281	-25.2486			1.3081	0.1382	1.1486	0.1449	0.6728	0.115	0.5143	0.1395	-0.0443	0.1446	0.7199			-0.0239	0.0141	0.0508	0.0163	-0.0027	0.0127	-0.0009	0.0118	0.0123	0.0115	0.00712			-22.1567	0.1799	-22.1314	0.168	-24.4727	0.1677	-24.6549	0.2118	-29.1879
	LEU-32	0.0503	0.0032	0.0419	0.0022	0.0271	0.0026	0.0074	0.0035	-0.0593	0.0048	0.01348			0.0411	0.0096	0.0186	0.005	0.0175	0.006	0.0036	0.009	0.0128	0.007	0.01872			-0.029	0.0141	-0.027	0.0134	0.0107	0.0153	-0.0114	0.0102	0.0105	0.0128	-0.00924			0.0625	0.0178	0.0339	0.0149	0.0545	0.0162	0.0002	0.0148	-0.0359
	HIS-33	0.0732	0.0085	0.1158	0.009	-0.127	0.0154	0.1855	0.005	0.1737	0.0205	0.08424			0.5117	0.0586	0.4288	0.0659	0.5598	0.0626	-0.1134	0.0547	0.1264	0.0702	0.30266			-0.0141	0.0103	-0.0036	0.0099	0.0011	0.0064	-0.0027	0.0118	-0.0009	0.0077	-0.00404			0.5742	0.0588	0.5413	0.0639	0.4357	0.0658	0.0707	0.0558	0.3015
	MET-34	-0.142	0.0042	-0.1719	0.0052	-0.0998	0.0033	-0.1244	0.0036	-0.0981	0.004	-0.12724			0.0093	0.0042	0.0206	0.0052	0.0152	0.0051	0.0077	0.0038	0.006	0.0044	0.01176			0.0243	0.0111	0.0069	0.0096	-0.0093	0.0102	-0.015	0.0124	-0.0127	0.0119	-0.00116			-0.108	0.0119	-0.1437	0.0116	-0.0935	0.012	-0.132	0.0137	-0.104
	SER-35	0.1089	0.0049	0.1566	0.006	0.0919	0.0042	0.0748	0.0026	-0.0157	0.004	0.0833			0.3075	0.0343	0.1353	0.0218	0.1621	0.0344	0.0341	0.0226	-0.0012	0.0203	0.12756			0.0153	0.009	-0.0014	0.0077	-0.0093	0.0072	-0.0015	0.0067	-0.001	0.006	0.00042			0.4329	0.0352	0.2906	0.0237	0.2438	0.0338	0.1068	0.0233	-0.0181
	PHE-36	-0.0405	0.0036	-0.0415	0.0041	-0.0208	0.0025	-0.019	0.0025	-0.0295	0.0024	-0.03026			0.0109	0.0039	0.0003	0.004	0.0056	0.0044	-0.0025	0.0042	0.0094	0.0055	0.00474			-0.0184	0.0133	-0.0216	0.0119	-0.0049	0.0122	0.0009	0.0121	0.0039	0.0092	-0.00802			-0.0482	0.0143	-0.0627	0.0127	-0.0207	0.0131	-0.0198	0.0127	-0.0171
	SER-37	-0.0924	0.0053	0.1307	0.0055	-0.0823	0.004	-0.0531	0.0031	0.0299	0.0055	-0.01344			0.0406	0.0138	0.0634	0.015	-0.0013	0.0126	0.0173	0.01	-0.0271	0.0158	0.01858			-0.0043	0.0031	-0.0066	0.0062	-0.0016	0.0032	-0.0002	0.0041	0.0039	0.0065	-0.00176			-0.0576	0.0141	0.1872	0.0169	-0.0852	0.014	-0.0357	0.0111	0.0064
	GLU-38	24.8012	0.0844	26.4586	0.094	24.6097	0.1008	23.1116	0.1123	24.2159	0.0874	24.6394			1.5183	0.1286	0.902	0.1514	0.8549	0.1304	0.6937	0.116	0.6841	0.1123	0.9306			0.0018	0.0099	-0.0212	0.0116	-0.0209	0.0121	-0.0214	0.0123	0.0201	0.0123	-0.00832			26.3201	0.1595	27.342	0.166	25.4478	0.1774	23.7852	0.155	24.9181
	SER-39	-0.1257	0.0076	-0.1712	0.0072	-0.0921	0.007	-0.0438	0.0062	-0.0354	0.005	-0.09364			0.5578	0.0529	0.2694	0.0555	0.2478	0.0548	0.1433	0.0476	0.0768	0.0518	0.25902			-0.0006	0.0088	0.004	0.009	-0.0154	0.0078	0.0011	0.0089	0.003	0.0083	-0.00158			0.4339	0.0546	0.1017	0.0584	0.1448	0.0568	0.1007	0.0498	0.0435
	ARG-40	-21.1322	0.0829	-21.7907	0.0762	-21.3237	0.1082	-21.0202	0.1393	-21.9037	0.126	-21.4341			0.4505	0.0525	0.523	0.0727	0.3535	0.0696	0.3384	0.0726	-0.3597	0.0588	0.26114			-0.0006	0.0079	0.0005	0.0059	-0.0083	0.0069	-0.0112	0.0069	-0.0067	0.0079	-0.00526			-20.6775	0.0991	-21.2671	0.1165	-20.9747	0.1207	-20.6942	0.1589	-22.2701
	HIS-41	0.2512	0.0048	0.1742	0.0062	0.0747	0.0065	0.0238	0.0054	-0.1472	0.0085	0.07534			0.5759	0.059	0.3679	0.0623	0.1731	0.0528	0.1978	0.0512	0.0836	0.0488	0.27966			0.0038	0.0129	0.0004	0.0079	0.0084	0.0091	-0.0094	0.0094	0.0066	0.009	0.00196			0.8323	0.0608	0.5415	0.0607	0.2586	0.054	0.2134	0.0507	-0.0593
	ASN-42	0.2458	0.012	0.221	0.0141	0.0721	0.0101	0.0916	0.0077	-0.2786	0.021	0.07038			0.3333	0.0546	0.3863	0.056	0.1877	0.0486	-0.0765	0.0407	0.0119	0.0525	0.16854			-0.0061	0.0065	-0.0086	0.0069	0.0087	0.0061	0.0079	0.0075	-0.0079	0.0077	-0.0012			0.5743	0.0562	0.6009	0.0591	0.267	0.051	0.021	0.0424	-0.2763
	GLU-43	20.3479	0.0622	21.3546	0.0582	22.4157	0.1126	22.6616	0.1252	25.4739	0.1334	22.4507			1.3316	0.1238	1.0846	0.1535	0.7532	0.1295	0.5386	0.1301	0.4221	0.1112	0.82602			0.0012	0.0087	-0.0087	0.0077	0.0014	0.0074	-0.0041	0.0076	-0.0036	0.0076	-0.00276			21.6771	0.1304	22.4283	0.1655	23.1783	0.1774	23.1954	0.1856	25.888
	ASN-44	-0.2888	0.0064	-0.3126	0.0089	-0.1047	0.01	-0.0035	0.0084	0.2723	0.0172	-0.08746			0.1436	0.0296	0.1265	0.0373	-0.0101	0.0376	-0.0696	0.0321	-0.0996	0.0338	0.01816			0.0183	0.0072	-0.0015	0.0064	0.0089	0.0065	-0.0053	0.0058	-0.0111	0.0087	0.00186			-0.1282	0.0316	-0.1857	0.0401	-0.1051	0.0392	-0.0773	0.034	0.1625
	CYS-45	0.1565	0.0047	0.1695	0.0054	-0.0346	0.0052	-0.0593	0.0063	-0.4185	0.0157	-0.03728			0.3394	0.0302	0.269	0.0372	0.1728	0.0303	0.2386	0.0322	0.0183	0.0244	0.20762			-0.0006	0.0088	0.0154	0.0084	-0.0031	0.0107	-0.0075	0.0117	0.0094	0.009	0.00272			0.4953	0.0327	0.4533	0.0382	0.1359	0.0341	0.1724	0.0361	-0.3922
	LEU-46	0.1085	0.0037	0.0206	0.0045	0.0674	0.0034	0.091	0.0028	0.0569	0.005	0.06888			-0.0249	0.0096	-0.0119	0.0079	-0.0215	0.011	-0.0224	0.0112	-0.0054	0.0085	-0.01722			-0.0249	0.015	-0.0318	0.013	-0.0072	0.0186	-0.0234	0.0175	0.0549	0.0136	-0.00648			0.0604	0.0182	-0.0232	0.0169	0.0386	0.0206	0.0449	0.0205	0.1065
	ILE-47	0.1494	0.0034	0.0996	0.0043	0.1407	0.0069	0.1753	0.0085	-0.1071	0.0222	0.09158			0.1251	0.0198	0.1414	0.0207	-0.0017	0.0194	0.0184	0.0212	-0.0112	0.0195	0.0544			-0.0185	0.0119	0.0342	0.0152	-0.0135	0.0085	0.0077	0.014	-0.021	0.0148	-0.00222			0.2554	0.0236	0.2754	0.0272	0.1255	0.0222	0.202	0.0262	-0.1385
	GLN-48	-0.0517	0.0319	-0.2565	0.0121	0.5053	0.0369	-0.0493	0.0342	-0.1582	0.1052	-0.00208			0.5693	0.0605	0.2459	0.0576	0.3002	0.0661	0.3806	0.0721	-0.0643	0.0833	0.28634			-0.0148	0.0089	0.0157	0.0096	0.0008	0.0079	-0.0039	0.0088	-0.0218	0.0087	-0.0048			0.4991	0.0708	0.005	0.0595	0.8051	0.0781	0.3266	0.0726	-0.2429
	GLU-49	27.1873	0.0701	29.4995	0.0829	26.5382	0.1023	27.2839	0.111	28.4769	0.1119	27.7972			0.9335	0.1158	0.5534	0.11	0.6143	0.1104	0.5569	0.1202	0.2029	0.1013	0.5722			-0.0037	0.0159	-0.0251	0.0133	-0.0043	0.0109	-0.0242	0.0152	0.0009	0.0156	-0.01128			28.12	0.1435	30.0237	0.1338	27.1407	0.1435	27.8195	0.1718	28.6859
	GLY-50	-0.0624	0.0061	-0.0573	0.0063	-0.0663	0.0044	-0.0758	0.0044	-0.1673	0.005	-0.08582			0.0039	0.0027	0.0065	0.002	0.0155	0.0027	0.0147	0.0022	0.0116	0.012	0.01044			-0.0108	0.0052	-0.0092	0.0058	-0.0138	0.0044	-0.0076	0.0037	-0.0037	0.0056	-0.00902			-0.0693	0.0079	-0.0601	0.0085	-0.0646	0.0071	-0.0684	0.0066	-0.1596
	ALA-51	0.0313	0.0042	0.0472	0.0045	0.0609	0.0038	0.0528	0.0038	0.0765	0.003	0.05374			0.0014	0.0031	0.0021	0.0023	-0.0109	0.0044	-0.0195	0.0023	-0.036	0.0018	-0.01258			0.0056	0.0078	-0.0021	0.0079	-0.0084	0.0076	0.0045	0.0056	-0.0061	0.0066	-0.0013			0.038	0.0091	0.047	0.0092	0.0414	0.0098	0.0378	0.007	0.0344
	LEU-52	-0.1578	0.0047	-0.1619	0.0055	-0.1699	0.0039	-0.1882	0.0033	-0.2225	0.0028	-0.18006			0.0277	0.0036	0.0246	0.0036	0.0531	0.0046	0.0567	0.0048	0.0717	0.0053	0.04676			-0.0068	0.0143	-0.0444	0.0124	0.0173	0.0104	-0.0233	0.0141	0.0589	0.0113	0.00034			-0.1362	0.0154	-0.1813	0.0141	-0.0995	0.0126	-0.1543	0.015	-0.0921
	LEU-53	0.2476	0.0039	0.286	0.005	0.2147	0.0042	0.1738	0.0032	0.1675	0.0026	0.21792			0.0937	0.0129	0.0892	0.0126	0.0886	0.013	0.0716	0.0126	-0.0181	0.006	0.065			-0.0091	0.0097	-0.0136	0.0105	-0.0106	0.0105	-0.0049	0.0119	0.0357	0.0127	-0.0005			0.3323	0.0156	0.3616	0.0176	0.2919	0.0178	0.2405	0.0173	0.1854
	PHE-54	0.3172	0.0057	0.3678	0.0064	0.4141	0.0086	0.2636	0.0091	0.42	0.0104	0.35654			0.1981	0.0208	0.1395	0.0218	0.0939	0.0212	0.0252	0.0198	-0.1285	0.0203	0.06564			-0.0168	0.0143	-0.0146	0.0133	-0.005	0.0116	-0.0251	0.012	-0.0033	0.0132	-0.01296			0.4992	0.0249	0.4926	0.0249	0.5024	0.0237	0.264	0.0264	0.288
	CYS-55	0.2614	0.0049	0.2867	0.0059	0.2182	0.0052	0.2551	0.0054	0.1862	0.006	0.24152			0.0097	0.0048	0.0029	0.0055	0.0199	0.0057	-0.0118	0.0062	-0.0268	0.0053	-0.00122			-0.0064	0.007	-0.0007	0.0067	-0.0078	0.0056	0.0007	0.0053	-0.0036	0.006	-0.00356			0.2644	0.01	0.2893	0.0108	0.2303	0.0086	0.2445	0.0092	0.155
	GLU-56	29.2933	0.0994	31.7863	0.1094	28.6708	0.1033	26.7374	0.1216	27.4225	0.0951	28.7821			1.2348	0.1375	0.8642	0.1379	0.7714	0.1341	0.535	0.1343	0.3351	0.1314	0.7481			0.0056	0.0086	-0.0102	0.0104	-0.0043	0.0082	-0.0064	0.008	0.0192	0.0096	0.00078			30.5394	0.1602	32.6365	0.1728	29.4379	0.1724	27.2676	0.1789	27.7789
	GLN-57	-0.501	0.0242	-0.6561	0.0238	-0.5769	0.0152	-0.4396	0.0176	-0.2548	0.0174	-0.48568			0.6553	0.0612	0.5919	0.0648	0.3392	0.0639	0.0998	0.0644	-0.0104	0.0584	0.33516			-0.0032	0.0122	0.0047	0.0119	-0.0002	0.0124	0.0025	0.0129	-0.001	0.0092	0.00056			0.1526	0.0669	-0.057	0.0736	-0.2351	0.0686	-0.3384	0.0682	-0.267
	ALA-58	-0.0522	0.0023	-0.0484	0.0042	-0.0246	0.0031	0.014	0.005	0.0045	0.0026	-0.02134			0.0057	0.0052	-0.0054	0.0054	-0.0085	0.0034	-0.0108	0.0056	-0.0326	0.0029	-0.01032			0.0071	0.0085	-0.0066	0.0065	-0.0119	0.0078	-0.0037	0.0061	0.0224	0.0085	0.00146			-0.0391	0.0104	-0.0603	0.0092	-0.0447	0.0094	-0.0011	0.0092	-0.0058
	VAL-59	-0.0492	0.0038	-0.0774	0.0037	-0.0477	0.0032	-0.0121	0.0024	-0.0012	0.0022	-0.03752			0.0555	0.0101	0.0249	0.0082	0.0388	0.0102	0.0232	0.0098	0.0118	0.0088	0.03084			0.0273	0.0205	0.0201	0.019	0.0018	0.0174	-0.0277	0.0223	0.0464	0.0178	0.01358			0.0336	0.0225	-0.032	0.02	-0.0077	0.0203	-0.0167	0.0257	0.0559
	VAL-60	-0.0674	0.0026	-0.0822	0.0028	-0.074	0.0023	-0.0745	0.0024	-0.0831	0.002	-0.07624			-0.0088	0.0029	-0.0015	0.0031	-0.0194	0.0049	-0.0058	0.0038	-0.0103	0.0036	-0.00916			-0.0158	0.0117	-0.0223	0.0116	-0.001	0.0119	-0.0124	0.0112	0.0098	0.0121	-0.00834			-0.0914	0.0122	-0.106	0.0127	-0.0943	0.0125	-0.0924	0.012	-0.0833
	ALA-61	-0.0512	0.0022	-0.036	0.003	-0.0239	0.0022	-0.0078	0.0021	0.038	0.0018	-0.01618			0.0108	0.0062	0.0069	0.0054	0.0394	0.0086	0.0369	0.0076	-0.0045	0.0067	0.0179			0.0159	0.0103	0.0019	0.0091	0.0103	0.0089	-0.0018	0.0096	-0.0076	0.0093	0.00374			-0.0243	0.0127	-0.0281	0.0117	0.026	0.0121	0.028	0.0121	0.0262
	PRO-62	-0.1071	0.0013	-0.1206	0.0017	-0.1082	0.0016	-0.111	0.0017	-0.1291	0.0023	-0.1152			0.0215	0.0114	0.0499	0.0108	0.0358	0.0108	0.0413	0.0121	0.0034	0.0126	0.03038			-0.0091	0.0099	0.0127	0.0113	0.0053	0.0078	-0.0107	0.0099	-0.0201	0.0102	-0.00438			-0.0942	0.0165	-0.0576	0.0155	-0.0666	0.0127	-0.0798	0.0158	-0.1459
	VAL-63	0.0386	0.0018	0.0421	0.0026	0.0568	0.001	0.0434	0.0013	0.0699	0.0017	0.05016			0.0236	0.0086	0.0273	0.0144	0.0132	0.0044	-0.0015	0.0099	-0.0034	0.0155	0.01184			0.0359	0.0122	0.0092	0.0142	0.0036	0.0107	0.0133	0.0126	-0.001	0.0105	0.0122			0.0978	0.0144	0.0805	0.0205	0.0736	0.0115	0.0546	0.0166	0.0657
	SER-64	-0.0106	0.0042	-0.0307	0.0049	0.0944	0.0053	0.0159	0.0046	0.1099	0.0073	0.03578			0.511	0.0474	0.4404	0.0644	0.3297	0.037	0.0587	0.0579	-0.0715	0.0636	0.25366			-0.022	0.009	-0.0015	0.0086	-0.0067	0.0107	-0.0096	0.0111	-0.0014	0.0103	-0.00824			0.48	0.0487	0.4104	0.0679	0.4178	0.0388	0.0665	0.0601	0.0402
	GLY-65	0.0125	0.0027	0.0047	0.0028	-0.0025	0.0026	-0.001	0.003	0.0224	0.0035	0.00722			0.0179	0.0071	0.0191	0.0117	0.023	0.0072	0.001	0.0075	0.0063	0.0064	0.01346			-0.0044	0.0059	0.0158	0.0072	-0.001	0.0024	-0.0038	0.0061	-0.0074	0.0055	-0.00016			0.026	0.0098	0.0397	0.0132	0.02	0.0079	-0.0034	0.0112	0.0214
	ASP-66	23.5763	0.0429	24.7141	0.0484	24.222	0.054	24.1642	0.0697	25.5437	0.0739	24.4441			0.7572	0.0917	0.7524	0.1029	0.4433	0.0996	0.5339	0.1006	0.2713	0.1006	0.55162			-0.0071	0.0078	-0.004	0.0102	-0.0066	0.0122	-0.006	0.0112	0.0299	0.0116	0.00124			24.3196	0.0975	25.46	0.1176	24.6553	0.1128	24.6938	0.1221	25.8454
	LEU-67	-0.0156	0.0022	0.0016	0.0027	-0.0207	0.0016	-0.0232	0.0017	-0.0256	0.0014	-0.0167			0.0005	0.0017	0.0054	0.0026	-0.0053	0.0026	-0.0063	0.0022	-0.003	0.0024	-0.00174			-0.0384	0.0166	0.0014	0.0142	-0.0134	0.0201	-0.0563	0.0202	0.068	0.0191	-0.00774			-0.0537	0.0164	0.008	0.0151	-0.0398	0.0192	-0.0854	0.0207	0.0393
	VAL-68	0.0689	0.0031	0.0913	0.0038	0.0396	0.0029	0.0406	0.0024	0.0018	0.0028	0.04844			-0.0052	0.0011	-0.0016	0.0015	0.002	0.0013	0.0091	0.0014	0.0121	0.0014	0.00328			-0.0049	0.0141	0.0031	0.0133	0.0057	0.0105	0.0211	0.012	0.0244	0.0106	0.00988			0.0589	0.0147	0.0932	0.0143	0.0471	0.0112	0.0706	0.0123	0.0384
	PHE-69	0.0523	0.0032	0.0439	0.0039	0.0551	0.003	0.0844	0.0029	0.0796	0.0025	0.06306			-0.0096	0.0055	0.0045	0.0065	0.001	0.0093	-0.0171	0.0084	-0.0094	0.0029	-0.00612			-0.0218	0.0092	0.0023	0.0096	0.0103	0.0098	0.0325	0.009	0.0083	0.0083	0.00632			0.0207	0.0112	0.051	0.0123	0.0658	0.0119	0.0997	0.013	0.0785
	ARG-70	-28.6092	0.0511	-30.749	0.0751	-28.3919	0.0606	-28.0501	0.0758	-28.6143	0.0813	-28.8829			0.3146	0.0398	0.305	0.0409	0.1303	0.0423	0.0764	0.0432	-0.1323	0.0413	0.1388			-0.0053	0.0064	-0.0198	0.0072	0.0188	0.0078	0.0001	0.0062	0.0002	0.0062	-0.0012			-28.3021	0.0616	-30.4649	0.0849	-28.2398	0.0702	-27.9812	0.0851	-28.7448
	PRO-71	0.2687	0.0061	0.2126	0.0068	0.2429	0.0048	0.2753	0.0036	0.2775	0.0032	0.2554			0.061	0.0109	0.0664	0.0114	-0.0022	0.0113	-0.014	0.0028	-0.0061	0.0096	0.02102			-0.0021	0.0075	-0.012	0.0121	0.0232	0.0116	-0.0124	0.0102	-0.0173	0.0105	-0.00412			0.3266	0.0137	0.2667	0.0183	0.264	0.0166	0.2494	0.0117	0.2546
	LEU-72	0.1329	0.0044	0.0708	0.0054	0.0954	0.0042	0.0609	0.0039	0.0033	0.0029	0.07266			0.0234	0.0039	0.0075	0.0051	0.0055	0.0039	0.0013	0.0031	0	0.0029	0.00754			-0.0194	0.0101	-0.0275	0.0121	0.008	0.012	0.0247	0.0108	-0.0072	0.0103	-0.00428			0.1368	0.0118	0.0496	0.0138	0.1082	0.0128	0.0867	0.0124	-0.0038
	LYS-73	-40.2783	0.1556	-42.9171	0.1696	-36.1281	0.1044	-35.8118	0.0983	-34.6122	0.1157	-37.9495			1.3104	0.1333	0.9936	0.117	0.6981	0.137	0.0607	0.1316	-0.0236	0.1388	0.60784			-0.0073	0.0127	0.0104	0.01	0.0128	0.0123	-0.0113	0.012	0.0076	0.0118	0.00244			-38.9815	0.201	-41.9037	0.2138	-35.4169	0.1642	-35.7622	0.1581	-34.6138
	ILE-74	-0.1081	0.0106	-0.1654	0.0132	-0.1844	0.0099	-0.1686	0.0097	-0.1323	0.009	-0.15176			0.0367	0.0161	-0.0268	0.0197	0.008	0.0254	0.0834	0.0275	0.0469	0.0183	0.02964			-0.0331	0.0156	-0.0628	0.0138	0.0005	0.0185	0.0231	0.0152	-0.0159	0.019	-0.01764			-0.1043	0.0252	-0.2545	0.0264	-0.1742	0.032	-0.0621	0.0334	-0.101
	GLU-75	43.3	0.1101	47.1063	0.1327	40.6398	0.114	38.7046	0.1271	39.1195	0.2002	41.774			0.376	0.0775	-0.6683	0.1046	-0.0973	0.1011	0.5423	0.1064	0.0917	0.1093	0.04888			-0.0728	0.0141	-0.0419	0.0168	-0.0131	0.0158	0.0286	0.0177	0.0035	0.0095	-0.01914			43.6048	0.1233	46.3893	0.1326	40.5287	0.1352	39.2792	0.1541	39.2231
	VAL-76	0.4	0.0127	0.396	0.0149	0.1681	0.013	0.1865	0.0121	0.037	0.0137	0.23752			-0.0585	0.0038	-0.1052	0.0088	0.0098	0.0094	0.113	0.0087	0.0436	0.009	0.00054			0.0286	0.0124	-0.0375	0.0139	-0.0066	0.0119	0.0573	0.0113	0.0314	0.0129	0.01464			0.3692	0.0171	0.2522	0.0214	0.1707	0.0183	0.3572	0.0189	0.1129
	LEU-77	-0.2993	0.0102	-0.2645	0.0132	-0.5228	0.011	-0.4815	0.0123	-0.5212	0.0108	-0.41786			0.0269	0.0048	0.0248	0.0048	0.1897	0.009	0.2655	0.0088	0.2147	0.0078	0.14432			0.0007	0.0155	0.0131	0.0152	0.0074	0.0144	-0.0174	0.0155	-0.008	0.0131	-0.00084			-0.2708	0.0188	-0.2259	0.0192	-0.3263	0.0192	-0.2332	0.0205	-0.3144
	SER-78	-0.337	0.0245	-1.1043	0.0161	-0.9157	0.0332	-0.7929	0.0321	-0.4567	0.0356	-0.72132			0.122	0.0226	0.3327	0.0265	0.378	0.0273	0.4378	0.043	0.2848	0.0509	0.31106			-0.0008	0.007	0.013	0.0063	0.0067	0.0076	0.0249	0.0104	-0.0003	0.0067	0.0087			-0.2161	0.0321	-0.759	0.0303	-0.5294	0.038	-0.3288	0.0533	-0.1692
	LYS-79	-53.9182	0.164	-58.5073	0.177	-50.737	0.1648	-48.5686	0.1519	-49.3812	0.2029	-52.2225			2.6775	0.121	3.364	0.1233	2.6453	0.1479	0.7854	0.144	2.4096	0.1564	2.37636			-0.0123	0.0129	-0.0387	0.0144	-0.0013	0.0167	-0.0075	0.0158	-0.016	0.0193	-0.01516			-51.2419	0.1564	-55.1803	0.1825	-48.088	0.1813	-47.7868	0.1581	-46.9888
	LEU-80	-0.2507	0.0163	-0.1589	0.0197	-0.8056	0.0193	-0.9282	0.0203	-0.7291	0.0218	-0.5745			0.0049	0.0051	0.0713	0.0073	0.3632	0.0117	0.4988	0.012	0.3671	0.0109	0.26106			0.001	0.0071	0.0203	0.009	0.0289	0.0098	0.0051	0.0124	0.0108	0.0123	0.01322			-0.2451	0.0172	-0.0672	0.0199	-0.4128	0.0201	-0.4254	0.0197	-0.3513
	LEU-81	-1.0216	0.0156	-1.155	0.0152	-1.7393	0.0289	-1.8134	0.0233	-1.2398	0.0197	-1.39382			0.1231	0.0066	0.2975	0.0121	0.6101	0.0174	0.712	0.0204	0.6118	0.0166	0.4709			-0.0056	0.0121	-0.0398	0.0115	0.011	0.015	0.058	0.0132	-0.0254	0.0152	-0.00036			-0.9029	0.0206	-0.8978	0.0194	-1.118	0.0321	-1.0452	0.027	-0.6532
	ALA-82	-0.9238	0.0277	-1.3067	0.0311	-1.7783	0.0419	-1.5134	0.0462	-0.3527	0.0405	-1.17498			0.3575	0.0095	0.5471	0.0164	0.6181	0.0204	0.7188	0.0258	0.4066	0.0234	0.52962			0.0201	0.0104	0.0034	0.0089	0.0111	0.0124	0.0386	0.0112	0.0068	0.0098	0.016			-0.5463	0.0299	-0.7577	0.0299	-1.1503	0.0381	-0.7574	0.0404	0.0593
	PHE-83	-0.821	0.0354	-1.1579	0.0377	-1.5454	0.0546	-1.5511	0.0577	-1.4497	0.0486	-1.30502			0.347	0.0159	0.7865	0.0261	0.6146	0.0326	0.6936	0.0329	0.727	0.032	0.63374			-0.018	0.0071	-0.0018	0.0085	-0.0079	0.0084	-0.0016	0.0095	0.0282	0.0098	-0.00022			-0.4923	0.0359	-0.3712	0.0366	-0.9361	0.048	-0.8617	0.0514	-0.6942
	ILE-84	-1.4621	0.0313	-1.884	0.032	-0.3461	0.0353	-0.1496	0.0382	0.6892	0.0281	-0.63052			-0.0388	0.0131	0.493	0.0244	0.238	0.022	0.2357	0.0262	0.1155	0.0252	0.20868			-0.0247	0.014	-0.0116	0.0145	0.0297	0.0149	-0.0042	0.0137	-0.0224	0.0144	-0.00664			-1.524	0.0328	-1.403	0.0348	-0.0795	0.0337	0.0808	0.0333	0.7818
	ASP-85	21.0598	0.3043	20.0881	0.321	-43.3925	0.994	-45.7771	1.3656	-40.4515	0.8578	-17.6946			6.7976	0.1591	7.7312	0.2716	66.6338	1.7731	74.9264	2.0585	68.2912	1.35	44.876			0.0489	0.0138	0.0382	0.0138	-0.7014	0.0256	-0.5351	0.0249	-0.4633	0.0228	-0.32254			27.9038	0.2773	27.8698	0.2519	22.5724	1.0549	28.6271	0.9818	27.386
	GLY-86	-1.0293	0.0989	-2.108	0.1425	2.4275	0.1128	0.6882	0.1626	0.4548	0.0667	0.08664			0.347	0.0339	1.4256	0.077	-1.9148	0.0806	-1.5023	0.1316	-1.1762	0.0619	-0.56414			0.0024	0.0087	-0.0017	0.0095	-0.0071	0.0117	-0.0386	0.0104	-0.0044	0.0076	-0.00988			-0.6827	0.0867	-0.687	0.1016	0.5088	0.0915	-0.8614	0.0848	-0.7309
	ALA-87	-1.9547	0.0774	-3.3105	0.1385	-11.3161	0.3195	-7.8122	0.2412	-5.5124	0.1432	-5.98118			0.0773	0.0395	1.4419	0.1356	9.2605	0.3233	5.6526	0.2705	3.1896	0.1885	3.92438			0.0468	0.0152	-0.022	0.0166	-0.6942	0.0214	-0.5714	0.0243	-0.2028	0.0139	-0.28872			-1.8276	0.0744	-1.8801	0.0735	-2.7652	0.1405	-2.7377	0.1428	-2.52
	GLY-88	0.1954	0.0669	0.6851	0.0707	-9.3407	0.1595	-9.3795	0.1682	-13.2024	0.1114	-6.20842			0.5039	0.0607	-0.8268	0.0519	7.5441	0.1939	8.2298	0.175	8.4794	0.1011	4.78608			-0.0151	0.0093	-0.0363	0.0059	-0.5375	0.0139	-0.6064	0.0127	-0.4928	0.0099	-0.33762			0.6804	0.0351	-0.1771	0.0538	-2.3351	0.1232	-1.74	0.1147	-5.2128
	LEU-89	-3.7137	0.1397	-1.3344	0.131	-5.1797	0.0882	-4.4566	0.0838	-5.6698	0.0725	-4.07084			1.5957	0.1611	-1.1568	0.0926	4.1348	0.1069	3.4198	0.1141	4.1989	0.098	2.43848			-0.4475	0.0183	-0.1689	0.0279	-0.1987	0.0143	-0.1619	0.0131	-0.1424	0.0144	-0.22388			-2.5659	0.0982	-2.6563	0.1084	-1.2458	0.0772	-1.1985	0.0788	-1.613
	VAL-90	-1.1526	0.0349	-0.6608	0.0418	-6.0621	0.1203	-6.3262	0.1141	-7.0054	0.0812	-4.24142			0.6806	0.0309	0.4268	0.0478	2.5194	0.0955	2.2179	0.0882	1.3553	0.0431	1.44			0.0147	0.0131	-0.0035	0.0122	-0.8583	0.0239	-0.9963	0.0217	-1.0081	0.0145	-0.5703			-0.4562	0.0349	-0.2361	0.0447	-4.4022	0.1035	-5.1009	0.1068	-6.6548
	ASP-91	-1.3827	0.3997	2.4002	0.3756	1.7836	0.6969	2.911	0.622	1.2826	0.5098	1.39894			3.4352	0.1415	2.4666	0.1575	11.9551	0.899	8.3172	0.7014	10.4896	0.5612	7.33274			0.0134	0.0074	-0.0064	0.0082	-0.3315	0.0221	-0.2502	0.0194	-0.3428	0.0151	-0.1835			2.0652	0.3612	4.8698	0.3305	13.3959	0.3368	11.0029	0.3055	11.4142
	THR-92	1.352	0.0372	0.702	0.0344	0.3485	0.0349	0.2604	0.0284	0.1565	0.0239	0.56388			-0.123	0.0534	-0.0242	0.0473	0.1109	0.0528	0.1795	0.0469	-0.026	0.0571	0.02344			-0.0071	0.0141	0.0092	0.0172	-0.0183	0.0132	-0.012	0.008	0.0059	0.0091	-0.00446			1.2232	0.0605	0.688	0.0583	0.4381	0.0552	0.4275	0.0524	0.1381
	THR-93	1.5049	0.0251	1.0441	0.0284	1.7036	0.0738	1.6261	0.0696	1.5765	0.0445	1.49104			0.1649	0.0403	0.1915	0.051	-0.9061	0.0967	-0.6421	0.0692	-0.6019	0.0484	-0.35874			-0.0143	0.0062	-0.0069	0.005	0.0033	0.0049	0.0084	0.0047	-0.0029	0.0043	-0.00248			1.6533	0.0435	1.231	0.0586	0.7994	0.0625	0.9948	0.0508	0.9724
	TYR-94	0.6535	0.043	0.7434	0.0396	-15.7201	0.6929	-23.8752	0.4942	-30.853	0.2693	-13.8103			0.3291	0.043	0.2527	0.0521	14.5917	0.5711	19.5744	0.4403	25.2119	0.3033	11.992			-0.0032	0.0105	-0.0447	0.0124	-1.8318	0.0568	-2.309	0.0317	-2.766	0.0252	-1.39094			0.9791	0.0614	0.9479	0.0595	-2.942	0.2777	-6.6272	0.2238	-8.4047
	ALA-95	-0.0661	0.0057	0.014	0.0083	0.2972	0.0143	0.3029	0.0218	0.3745	0.0242	0.1845			0.2512	0.0236	0.2079	0.031	0.0401	0.024	-0.047	0.0212	-0.2134	0.021	0.04776			-0.0065	0.0061	0.0003	0.007	0.0052	0.0118	-0.0325	0.0143	0.0256	0.0102	-0.00158			0.1781	0.0245	0.2236	0.0312	0.342	0.026	0.224	0.0286	0.1876
	GLU-96	20.5128	0.1213	21.8453	0.1139	20.9489	0.1972	21.3147	0.2541	22.2751	0.2222	21.3794			0.9805	0.1036	0.997	0.0998	0.6459	0.11	1.0445	0.1279	2.0186	0.1191	1.1373			-0.0324	0.0109	-0.0072	0.0098	-0.0241	0.0119	0.0026	0.0111	0.0245	0.0103	-0.00732			21.4638	0.158	22.8468	0.155	21.5716	0.2131	22.362	0.2682	24.3183
	SER-97	0.0828	0.0096	-0.0719	0.0102	-0.1187	0.012	-0.2113	0.0114	-0.3911	0.0191	-0.14204			0.4593	0.0447	0.4496	0.0603	0.2202	0.047	0.0969	0.0496	-0.0518	0.0409	0.23484			-0.0095	0.0055	0.0021	0.0058	-0.0071	0.0069	-0.0034	0.0065	0.0008	0.0085	-0.00342			0.5356	0.0432	0.3803	0.0616	0.0913	0.0485	-0.1138	0.0502	-0.4423
	ASP-98	23.556	0.0876	25.0259	0.0869	23.2531	0.1083	22.3578	0.1383	22.9145	0.1108	23.4215			0.1699	0.0503	0.3788	0.0636	0.5319	0.0502	0.7512	0.0581	1.1462	0.0517	0.5956			-0.0352	0.0104	-0.0253	0.0082	0.0023	0.0109	0.0224	0.0105	-0.0013	0.0106	-0.00742			23.6909	0.0982	25.3774	0.1114	23.785	0.1128	23.1273	0.1332	24.0592
	LYS-99	-24.8494	0.1183	-26.6525	0.1248	-24.3305	0.1406	-22.2052	0.1523	-23.0752	0.1174	-24.2226			0.4971	0.1261	0.6531	0.1266	-0.3986	0.1163	-0.7143	0.1382	-1.4876	0.1128	-0.29006			0.0274	0.0175	0.0228	0.021	-0.0073	0.0137	-0.0114	0.0163	0.0013	0.0185	0.00656			-24.3168	0.1808	-25.9744	0.1686	-24.7383	0.1807	-22.9387	0.194	-24.5694
	TRP-100	0.2767	0.0046	0.3503	0.0063	-0.0088	0.0106	-0.1698	0.0097	-0.4767	0.0128	-0.00566			0.2061	0.0274	0.1304	0.0316	0.0845	0.0305	0.1928	0.0325	0.1798	0.0294	0.15872			0.0086	0.0087	-0.0235	0.012	-0.0126	0.0123	-0.006	0.0127	-0.0073	0.0093	-0.00816			0.4911	0.0286	0.4571	0.0319	0.063	0.035	0.0184	0.0369	-0.3036
	VAL-101	0.1078	0.0037	0.1092	0.0048	0.1335	0.004	0.1239	0.0035	0.0687	0.0057	0.10862			0.013	0.005	-0.0103	0.0042	-0.0178	0.0066	-0.0236	0.0052	-0.0309	0.0056	-0.01392			0.0335	0.0112	0.0164	0.0151	0.0003	0.0134	-0.0029	0.011	0.0041	0.0095	0.01028			0.1539	0.0128	0.1146	0.016	0.1161	0.0152	0.0973	0.0132	0.0418
	LEU-102	0.151	0.0059	0.1842	0.006	-0.0919	0.0072	-0.0882	0.0069	-0.4309	0.0218	-0.05516			0.1663	0.0313	0.0587	0.0421	-0.0118	0.0242	0.0355	0.035	-0.0463	0.0339	0.04048			0.0034	0.0121	0.0098	0.0112	-0.02	0.014	0.0183	0.0128	-0.0236	0.012	-0.00242			0.3202	0.0341	0.2522	0.0463	-0.1245	0.0314	-0.035	0.0373	-0.5012
	LEU-103	-0.0719	0.0071	-0.1373	0.0059	-0.0349	0.0081	-0.0472	0.0062	-0.0256	0.0065	-0.06338			0.0218	0.0053	0.0451	0.0077	0.0072	0.004	0.0139	0.0052	0.0068	0.0053	0.01896			0.0406	0.0122	0.0162	0.0124	0.0013	0.0092	0.0155	0.0091	-0.0017	0.0112	0.01438			-0.0091	0.0156	-0.0764	0.016	-0.0265	0.0132	-0.0179	0.0125	-0.0211
	SER-104	0.1439	0.014	0.1047	0.0181	0.3943	0.0135	0.3641	0.0149	0.2433	0.0143	0.25006			0.5006	0.0436	0.4646	0.0635	0.1861	0.0448	0.1802	0.0438	0.035	0.0362	0.2733			-0.0063	0.0055	0.0086	0.0052	-0.0025	0.0067	-0.0144	0.0095	-0.0186	0.0098	-0.00664			0.6373	0.0454	0.5799	0.064	0.5779	0.0445	0.5269	0.049	0.2598
	PRO-105	-0.1983	0.0086	-0.2445	0.0101	-0.0997	0.0068	0.0011	0.0074	-0.0209	0.0107	-0.11246			0.1115	0.0135	0.1039	0.0132	0.081	0.0235	0.0282	0.0162	0.0184	0.0156	0.0686			0.005	0.0177	-0.0026	0.0138	-0.0061	0.01	-0.0011	0.012	0.0126	0.0159	0.00156			-0.0816	0.0226	-0.1436	0.0233	-0.0235	0.0273	0.0286	0.021	0.0087
	GLU-106	32.0701	0.1406	35.5207	0.1418	31.1475	0.1464	31.9811	0.1556	32.036	0.2838	32.5511			0.8947	0.1457	-0.0241	0.1056	0.4572	0.1258	0.3822	0.1249	-0.1487	0.1385	0.31226			0.0027	0.0114	0.0085	0.0103	0.0157	0.0083	-0.0051	0.0084	0.0074	0.0106	0.00584			32.9673	0.207	35.5078	0.1596	31.6205	0.2036	32.3555	0.2073	31.8851
	PHE-107	-0.1246	0.0129	-0.1201	0.0126	-0.3676	0.0167	0.0619	0.0078	-0.5435	0.0096	-0.21878			0.123	0.0137	0.0959	0.0109	0.3008	0.0303	0.0867	0.025	0.0858	0.0153	0.13844			-0.0184	0.0102	-0.0052	0.0096	-0.0118	0.0118	-0.0081	0.012	0.0181	0.0116	-0.00508			-0.0208	0.0208	-0.0302	0.0191	-0.0771	0.0363	0.1401	0.0288	-0.4406
	ARG-108	-29.3309	0.0773	-31.2105	0.0908	-30.7446	0.0946	-29.8568	0.1223	-32.2667	0.1164	-30.6819			0.602	0.0579	0.558	0.0638	0.4313	0.0754	0.0856	0.0622	-0.0597	0.0637	0.32344			0.0084	0.0071	0.0059	0.0069	0.0023	0.0067	-0.0029	0.0059	0.0126	0.009	0.00526			-28.716	0.0956	-30.6482	0.1106	-30.3042	0.1174	-29.7773	0.1372	-32.3136
	ALA-109	0.1578	0.007	0.1721	0.0076	0.3712	0.0059	0.3186	0.0055	0.3221	0.0087	0.26836			-0.0409	0.0118	0.0072	0.0113	0.118	0.0244	0.0811	0.029	0.028	0.0237	0.03868			0.0036	0.0078	-0.002	0.0089	0.0261	0.0093	-0.0154	0.0085	-0.0058	0.0082	0.0013			0.1212	0.0153	0.1777	0.0167	0.5158	0.0285	0.3861	0.0296	0.3435
	ILE-110	0.6217	0.0056	0.6799	0.0059	0.5513	0.0054	0.4552	0.0059	0.4832	0.0057	0.55826			-0.0168	0.0051	0.0137	0.0107	0.0215	0.0109	0.0012	0.0064	-0.0281	0.0097	-0.0017			0.037	0.0117	0.005	0.0115	-0.0009	0.0101	0.0096	0.0081	0.0074	0.0124	0.01162			0.6417	0.0129	0.6991	0.016	0.5719	0.0156	0.4661	0.0106	0.463
	TRP-111	0.725	0.0119	0.7253	0.0142	0.6235	0.011	0.5848	0.0095	0.4082	0.0102	0.61336			0.2567	0.0302	0.2247	0.036	0.0568	0.0336	0.0766	0.0189	0.0091	0.0219	0.12478			0.0159	0.0113	-0.0141	0.0102	-0.0172	0.0118	-0.0187	0.01	0.0049	0.0109	-0.00584			0.9968	0.0331	0.9347	0.0383	0.6636	0.0379	0.6423	0.0233	0.4207
	GLN-112	0.2237	0.021	0.3929	0.028	0.3381	0.0267	0.2503	0.0217	0.0183	0.025	0.24466			0.9286	0.0674	0.7671	0.0796	0.5645	0.0738	0.431	0.0615	0.0559	0.0665	0.54942			0.0032	0.0078	-0.005	0.0083	0.0284	0.0115	0.005	0.0085	-0.0184	0.0095	0.00264			1.1564	0.0715	1.1528	0.0827	0.9321	0.0735	0.689	0.0623	0.0575
	ASP-113	38.9426	0.0802	41.5973	0.1065	38.0478	0.0889	37.4696	0.0832	38.6629	0.1121	38.944			0.2293	0.0817	0.074	0.0897	0.0251	0.0904	0.1659	0.1009	-0.3615	0.0841	0.02656			-0.0084	0.0073	0.013	0.0083	-0.0036	0.0067	0.0019	0.0082	-0.0235	0.0099	-0.00412			39.1644	0.1135	41.6856	0.1383	38.0636	0.1285	37.636	0.1233	38.2759
	ARG-114	-47.253	0.2017	-49.6203	0.2777	-43.1204	0.2288	-42.7717	0.1843	-41.8058	0.237	-44.9142			0.965	0.0614	1.084	0.0721	0.7687	0.0732	0.2683	0.0743	0.2366	0.0739	0.66452			-0.0169	0.0089	-0.0025	0.01	0.0059	0.0094	0.0152	0.0106	0.0011	0.0122	0.00056			-46.3029	0.2019	-48.5429	0.2772	-42.3394	0.2207	-42.4954	0.1829	-41.5623
	LYS-115	-47.0257	0.1933	-51.175	0.2592	-46.7738	0.2344	-45.4184	0.2265	-49.3468	0.2266	-47.9479			1.5426	0.1303	1.6362	0.1309	1.5078	0.1214	0.8902	0.1313	1.9006	0.1214	1.49548			0.0072	0.011	0.0162	0.0104	0.0101	0.0107	-0.0298	0.0118	0.0044	0.0119	0.00162			-45.4752	0.2257	-49.5157	0.267	-45.2488	0.2451	-44.5585	0.236	-47.4325
	ARG-116	-35.7493	0.0829	-37.9406	0.1098	-35.3478	0.0817	-35.1063	0.0914	-36.5652	0.1074	-36.1418			0.8297	0.0618	0.7606	0.0623	0.4924	0.0572	0.1224	0.0571	0.1921	0.0652	0.47944			-0.0003	0.0095	-0.0037	0.0102	-0.0063	0.0111	0.0153	0.0094	0.0123	0.0119	0.00346			-34.9205	0.101	-37.1851	0.1288	-34.858	0.0937	-34.9714	0.0994	-36.3596
	CYS-117	-0.0081	0.0154	0.0863	0.0227	-0.3134	0.0147	-0.21	0.014	-0.5888	0.0102	-0.2068			-0.0837	0.0047	-0.0647	0.0107	-0.0081	0.0076	0.0255	0.0067	0.0577	0.0039	-0.01466			0.0277	0.0075	0.0287	0.0085	0.0132	0.0099	0.0077	0.0081	0.0207	0.0077	0.0196			-0.0642	0.017	0.05	0.0244	-0.3079	0.0178	-0.1769	0.0168	-0.5105
	GLU-118	51.357	0.132	55.4439	0.1493	49.9787	0.1538	48.7004	0.1502	48.2698	0.2139	50.75			-1.3695	0.1321	-1.6828	0.1355	-2.5202	0.1117	-1.5084	0.132	-1.7975	0.1138	-1.77568			0.0158	0.0137	0.0191	0.0164	0.0071	0.0115	0.006	0.0151	0.0066	0.0159	0.01092			50.0074	0.1551	53.774	0.1778	47.4628	0.1599	47.2055	0.1613	46.4705
	TYR-119	0.5295	0.0387	0.5705	0.0424	-0.2817	0.0253	-0.1075	0.0301	-0.1627	0.0351	0.10962			0.0219	0.034	-0.0228	0.0338	0.135	0.0317	0.0221	0.0358	0.0344	0.0221	0.03812			-0.016	0.0137	-0.0104	0.0135	0.0155	0.0113	-0.0015	0.0108	0.0109	0.0118	-0.0003			0.5358	0.0507	0.5374	0.0528	-0.1316	0.0381	-0.0857	0.0454	-0.1149
	TRP-120	0.6625	0.0114	0.6265	0.0135	0.21	0.0129	0.3051	0.0116	0.419	0.0148	0.44462			-0.0432	0.0279	-0.0773	0.0317	-0.0744	0.033	-0.058	0.032	-0.0869	0.0188	-0.06796			0.0309	0.0145	-0.0081	0.0129	0.0094	0.0104	0.0304	0.0108	-0.0428	0.0153	0.00396			0.6515	0.0314	0.5406	0.0348	0.1461	0.036	0.2772	0.0331	0.2893
	PHE-121	-0.6875	0.0142	-0.6984	0.0177	-1.2129	0.0177	-0.9958	0.0161	-1.4982	0.0194	-1.01856			-0.038	0.0089	-0.002	0.0087	0.1808	0.0086	0.1202	0.009	0.3457	0.011	0.12134			0.0073	0.0093	-0.0007	0.01	-0.0068	0.0119	-0.004	0.0107	0.0028	0.0141	-0.00028			-0.7187	0.0176	-0.7001	0.0195	-1.0395	0.0193	-0.8791	0.0178	-1.1503
	LEU-122	0.2029	0.0204	0.3964	0.0221	-0.3252	0.0277	-0.0171	0.0248	-0.7725	0.0349	-0.1031			-0.3237	0.0093	-0.3053	0.0106	-0.098	0.0135	-0.2071	0.0115	0.1698	0.0181	-0.15286			-0.0063	0.0159	-0.0013	0.0152	0.0224	0.0162	-0.0546	0.0176	0.0377	0.0173	-0.00042			-0.1281	0.0249	0.0894	0.0235	-0.4002	0.0238	-0.2774	0.0245	-0.5652
	GLN-123	-1.1107	0.0508	-0.2025	0.0759	-1.4597	0.0719	-1.148	0.0722	-2.0727	0.0815	-1.19872			0.7066	0.0526	0.3237	0.058	0.5761	0.0571	0.2621	0.0577	0.5734	0.0468	0.48838			0.0065	0.0116	0.0007	0.0115	0.0089	0.0105	-0.0011	0.0105	0.0159	0.0134	0.00618			-0.3947	0.0664	0.1209	0.0775	-0.8722	0.0749	-0.887	0.0703	-1.4832
	GLN-124	-0.8465	0.0245	-2.1335	0.0407	-3.5022	0.035	-3.2401	0.0339	-0.64	0.0216	-2.07246			0.531	0.051	0.5322	0.0317	0.9131	0.0342	0.7933	0.0369	0.4338	0.052	0.64068			0.0035	0.0076	-0.0017	0.006	0.0024	0.0053	0.0045	0.0076	-0.0268	0.0128	-0.00362			-0.31	0.0517	-1.6018	0.0489	-2.5871	0.0396	-2.4431	0.0388	-0.2333
	ILE-125	-1.0348	0.0329	-0.8383	0.0374	-2.6953	0.0519	-2.4245	0.0485	-4.3297	0.0568	-2.26452			0.115	0.0133	0.2147	0.0166	0.8678	0.0309	0.6858	0.0292	1.3809	0.0383	0.65284			-0.0275	0.0112	-0.027	0.0132	-0.0039	0.0123	-0.0092	0.011	-0.0094	0.0124	-0.0154			-0.9473	0.0302	-0.6498	0.0349	-1.8311	0.038	-1.7464	0.0373	-2.9589
	ILE-126	-0.9012	0.0403	-0.4107	0.0547	-3.1413	0.1036	-2.5026	0.0733	-5.6606	0.1368	-2.52328			0.0839	0.0247	0.053	0.0298	1.0809	0.0822	0.8666	0.0586	4.3805	0.1405	1.29298			-0.0235	0.0142	-0.0006	0.0143	-0.0127	0.0133	-0.0015	0.0139	-0.0932	0.0181	-0.0263			-0.8426	0.0447	-0.3556	0.0477	-2.0706	0.0725	-1.6397	0.0511	-1.3752
	THR-127	-0.4502	0.0354	-0.1074	0.0532	-0.7515	0.0783	1.412	0.0658	-1.4465	0.1126	-0.26872			0.5857	0.0503	0.4817	0.0536	0.386	0.0685	-0.5337	0.0574	-0.4842	0.0817	0.0871			-0.0022	0.0057	0.0026	0.0076	-0.0129	0.0062	-0.0042	0.008	-0.161	0.016	-0.03554			0.1343	0.0656	0.3775	0.0668	-0.383	0.0768	0.8755	0.0641	-2.0967
	PRO-128	-0.6335	0.0367	-0.3802	0.0398	-1.239	0.0925	-1.2749	0.1013	-9.5391	0.2299	-2.61334			0.1255	0.0237	0.0719	0.0268	-0.5719	0.0394	-0.6392	0.0443	3.1673	0.156	0.43072			0.0656	0.0166	-0.0047	0.0122	-0.3259	0.0202	-0.3919	0.0204	-1.7245	0.0269	-0.47628			-0.4415	0.0503	-0.3132	0.0471	-2.1359	0.1123	-2.3016	0.1015	-8.0939
	SER-129	-0.1297	0.0402	-0.3174	0.0334	0.0768	0.0456	-0.2686	0.0598	-2.8585	0.1063	-0.69948			0.4448	0.035	0.3809	0.0382	-0.0313	0.0387	0.2267	0.0405	2.1129	0.0957	0.6268			-0.0062	0.005	-0.0043	0.0065	-0.0208	0.008	-0.0081	0.0087	-0.234	0.0118	-0.05468			0.3101	0.0552	0.0572	0.0516	0.024	0.0509	-0.0488	0.0595	-0.9759
	PRO-130	-0.2764	0.0074	-0.3289	0.0086	-0.942	0.0401	-1.214	0.046	-12.5299	0.1951	-3.05824			0.1133	0.0077	0.1044	0.0102	-0.0118	0.0172	0.075	0.0153	1.3294	0.0659	0.32206			0.0003	0.0052	-0.016	0.0058	-0.0677	0.0131	-0.0691	0.0133	-1.5858	0.0214	-0.34766			-0.1631	0.0112	-0.2405	0.0152	-1.0196	0.0563	-1.2062	0.0578	-12.7842
	ALA-131	-0.2243	0.0102	-0.293	0.012	0.1305	0.0186	-0.0347	0.0202	-1.0043	0.0786	-0.28516			0.2135	0.0236	0.2132	0.0277	0.0811	0.0211	0.1515	0.0218	1.0716	0.0849	0.34618			0.0333	0.0109	-0.0005	0.0166	-0.0008	0.011	-0.0034	0.0104	-0.0851	0.0151	-0.0113			0.0222	0.0277	-0.0814	0.0332	0.2103	0.0252	0.1122	0.0282	-0.0132
	PHE-132	-0.0652	0.0128	-0.1	0.0141	0.3195	0.0234	0.185	0.0228	0.4528	0.0304	0.15842			0.1758	0.0073	0.1328	0.0077	0.0316	0.0144	0.0158	0.0157	0.0072	0.0228	0.07264			-0.0332	0.0168	0.0038	0.0145	0.0073	0.015	-0.0011	0.0164	-0.0426	0.0166	-0.01316			0.0778	0.023	0.0358	0.0215	0.3583	0.0259	0.2002	0.0254	0.4166
	ASN-133	1.5082	0.0628	1.2848	0.069	2.4172	0.1267	2.5143	0.1704	5.0042	0.1305	2.54574			0.2017	0.0482	-0.1937	0.0578	2.1974	0.2771	-0.5854	0.2623	-2.1388	0.1315	-0.10376			-0.0099	0.0076	-0.018	0.008	-0.1802	0.0171	-0.1588	0.0164	-0.3506	0.013	-0.1435			1.696	0.0828	1.0732	0.1054	4.4208	0.2151	1.7653	0.2049	2.5118
	LYS-134	-19.026	0.1604	-20.0535	0.1604	-19.0503	0.3005	-19.2676	0.3979	-23.6774	0.391	-20.215			0.739	0.1283	0.3447	0.1371	0.5262	0.168	-0.4069	0.1835	3.0423	0.6	0.84906			-0.0004	0.007	-0.0106	0.0086	-0.0068	0.0104	-0.0261	0.0106	-0.539	0.0238	-0.11658			-18.2936	0.2036	-19.7244	0.2036	-18.5333	0.3407	-19.6901	0.4104	-21.1731
	VAL-135	-0.0473	0.0096	-0.0951	0.0089	0.3986	0.0168	0.2478	0.0157	0.6043	0.017	0.22166			0.0886	0.0052	0.0407	0.0076	-0.1054	0.0112	-0.1668	0.0162	-0.3666	0.0144	-0.1019			-0.0337	0.01	-0.0311	0.0115	0.0169	0.0117	-0.0036	0.0116	0.0164	0.0116	-0.00702			0.0074	0.0152	-0.0856	0.0171	0.3099	0.0206	0.0751	0.0211	0.2545
	LEU-136	0.0837	0.0172	0.1919	0.0135	0.7095	0.0264	0.5693	0.0212	0.9523	0.0194	0.50134			0.2956	0.0135	0.0658	0.0099	-0.0697	0.0182	-0.2384	0.0148	-0.4368	0.0195	-0.0767			0.1206	0.0201	0.0409	0.0172	0.0841	0.019	-0.003	0.0145	-0.0169	0.0134	0.04514			0.5004	0.0259	0.2995	0.0235	0.7239	0.0306	0.3274	0.0209	0.4994
	ALA-137	-0.1137	0.014	-0.1667	0.0147	0.2656	0.0268	-0.0842	0.0217	0.4011	0.018	0.06042			0.186	0.0121	0.0358	0.0087	0.0295	0.0181	-0.129	0.014	-0.3822	0.0145	-0.05198			0.0006	0.0063	-0.0073	0.0091	0.0092	0.0119	-0.0169	0.0094	0.0113	0.008	-0.00062			0.0726	0.0196	-0.1375	0.0212	0.3033	0.0306	-0.2303	0.0202	0.0306
	LEU-138	-0.0058	0.0107	-0.0357	0.0104	0.2921	0.0165	0.0802	0.0143	0.3249	0.0131	0.13114			0.0887	0.016	0.0098	0.0153	-0.1127	0.0175	-0.1749	0.0193	-0.3692	0.0231	-0.11166			-0.0085	0.0145	-0.0399	0.0166	-0.0211	0.0141	-0.0264	0.0124	0.0356	0.0129	-0.01206			0.0744	0.0227	-0.0663	0.0242	0.1575	0.0239	-0.1208	0.0235	-0.0096
	LEU-139	0.431	0.0383	0.4103	0.0135	0.9798	0.0186	0.6352	0.0141	0.3464	0.04	0.56054			0.0712	0.0108	-0.0359	0.0117	-0.1601	0.0114	-0.3461	0.0166	-0.137	0.03	-0.12158			0.0374	0.0156	0.0316	0.014	0.0299	0.0153	0.0202	0.0151	-0.0048	0.018	0.02286			0.5386	0.0385	0.4053	0.023	0.8512	0.0248	0.3091	0.0232	0.205
	ARG-140	-15.4239	0.1981	-19.924	0.1879	-13.9667	0.2207	-9.6722	0.2582	-10.4396	0.2488	-13.8853			-2.9636	0.0881	-0.4555	0.0725	-3.9688	0.1362	-6.116	0.192	-8.6491	0.1939	-4.4306			0.0071	0.0153	0.0131	0.0132	-0.0109	0.0141	-0.0035	0.0104	0.0081	0.0135	0.00278			-18.3795	0.1826	-20.3712	0.1735	-17.9487	0.1594	-15.7857	0.1749	-19.0838
	LYS-141	-27.4082	0.2003	-26.904	0.163	-27.0859	0.1819	-26.3366	0.219	-30.4736	0.2662	-27.6417			-0.2965	0.1238	-0.0111	0.1227	-0.7215	0.1502	-1.7515	0.1383	-1.8734	0.1428	-0.9308			-0.0277	0.0122	-0.0732	0.0151	-0.0389	0.0159	-0.0179	0.0144	-0.0067	0.0123	-0.03288			-27.7266	0.2221	-26.9828	0.1988	-27.8391	0.2136	-28.1001	0.2332	-32.3489
	SER-142	0.7867	0.0257	0.6073	0.0189	0.9365	0.0245	0.452	0.0158	0.8418	0.044	0.72486			0.2741	0.0337	0.1794	0.0151	0.2921	0.0444	0.3108	0.046	0.1398	0.044	0.23924			-0.0384	0.0094	-0.0041	0.0071	0.0083	0.0079	-0.0054	0.007	-0.0229	0.0081	-0.0125			1.0218	0.0449	0.7827	0.0255	1.2341	0.0492	0.7566	0.0505	0.9594
	GLU-143	35.1787	0.1233	36.8447	0.1162	37.1571	0.181	36.151	0.2142	36.7321	0.1764	36.4127			1.8376	0.1301	1.0867	0.1147	1.8669	0.133	1.7596	0.1452	0.4707	0.1224	1.4043			0.0236	0.0105	0.0187	0.0112	-0.0044	0.0111	0.0383	0.0103	0.0278	0.015	0.0208			37.0419	0.177	37.9513	0.149	39.0168	0.2179	37.9488	0.2304	37.2385
	SER-144	1.1564	0.022	1.0923	0.0105	1.0518	0.0167	1.0108	0.014	1.5005	0.0333	1.16236			0.5323	0.0413	0.1623	0.0319	0.3394	0.0404	0.4355	0.0411	-0.1425	0.0451	0.2654			0.0266	0.0113	0.0154	0.0112	-0.01	0.013	0.0075	0.0098	-0.0013	0.0078	0.00764			1.7144	0.044	1.2698	0.0335	1.3831	0.0434	1.4544	0.0397	1.358
	TYR-145	0.4626	0.0223	0.583	0.0309	0.7371	0.0331	1.0359	0.0266	1.2924	0.0568	0.8222			0.6205	0.0214	0.3156	0.0254	0.3479	0.0315	0.1727	0.0324	-0.1925	0.0432	0.25284			0.0597	0.0142	0.0787	0.0152	0.0126	0.0149	0.0282	0.0148	-0.0179	0.0106	0.03226			1.1431	0.029	0.9769	0.0347	1.0996	0.0416	1.2379	0.0402	1.0807
	TRP-146	0.1166	0.0182	0.0088	0.021	-0.3039	0.023	-0.3612	0.0246	0.6192	0.0243	0.0159			0.3292	0.01	0.2719	0.0096	0.2758	0.0119	0.4085	0.0125	0.0235	0.013	0.26178			0.0168	0.0078	-0.0086	0.0102	0.0161	0.0111	0.0356	0.0136	0.0098	0.0149	0.01394			0.4636	0.0215	0.2714	0.0235	-0.0115	0.0299	0.0814	0.03	0.6515
	LEU-147	1.4134	0.0113	1.6655	0.0107	1.7442	0.015	1.5608	0.0174	2.2908	0.0178	1.73494			0.3211	0.0083	0.1507	0.0092	0.1315	0.0129	0.3198	0.0144	-0.2597	0.013	0.13268			0.0247	0.0096	-0.0184	0.016	0.0451	0.0129	-0.0105	0.0142	0.0006	0.0107	0.0083			1.759	0.0136	1.7973	0.0176	1.9203	0.017	1.8704	0.0198	2.0319
	VAL-148	1.7913	0.0127	1.9596	0.0145	2.0686	0.0174	1.9868	0.0155	3.1423	0.0193	2.18972			0.0891	0.0067	-0.0369	0.0077	-0.1509	0.0095	0.0317	0.0134	-0.7545	0.0146	-0.1643			-0.0063	0.0083	-0.0037	0.008	-0.0011	0.011	0.0673	0.0131	-0.018	0.0116	0.00764			1.8743	0.0147	1.9186	0.0163	1.9174	0.0193	2.0846	0.0193	2.3688
	GLY-149	1.5037	0.0226	1.8961	0.0203	2.1591	0.0243	2.0462	0.0233	3.3448	0.0343	2.18998			0.3666	0.0086	0.1943	0.0085	-0.0207	0.0115	0.0753	0.0117	-0.6285	0.0173	-0.0026			0.0319	0.0049	0.0158	0.0043	0.0241	0.0065	0.0375	0.0067	0.033	0.0073	0.02846			1.9017	0.0201	2.1057	0.0208	2.1618	0.0227	2.159	0.0228	2.749
	TYR-150	2.3369	0.0367	2.6338	0.0399	4.0108	0.0438	4.0641	0.0479	4.8161	0.0537	3.57234			-1.2888	0.0356	-1.3994	0.0401	-1.7622	0.039	-1.9055	0.0441	-2.4079	0.0468	-1.75276			-0.0124	0.007	-0.0033	0.0074	-0.0005	0.0066	-0.0046	0.0083	-0.0141	0.0096	-0.00698			1.0348	0.0361	1.234	0.033	2.2503	0.0351	2.1507	0.0468	2.3956
	LEU-151	1.5479	0.0198	1.8612	0.0204	2.4054	0.0243	1.7437	0.0336	3.2182	0.0339	2.15528			0.5876	0.0209	0.4364	0.0213	0.1436	0.0254	0.4639	0.0311	-0.7074	0.0359	0.18482			-0.017	0.0176	-0.0264	0.0178	0.0045	0.0127	-0.0268	0.0142	-0.0661	0.0209	-0.02636			2.1179	0.0266	2.2695	0.0273	2.5542	0.0262	2.1804	0.0299	2.4461
	LEU-152	2.9954	0.0266	3.2014	0.0222	3.947	0.0258	3.5067	0.0289	4.5262	0.0379	3.63534			-0.4507	0.0214	-0.4056	0.0236	-0.7966	0.0269	-0.7972	0.0209	-1.8795	0.0305	-0.86592			0.0036	0.0099	-0.0012	0.0098	-0.0057	0.0092	0.013	0.0075	0.0346	0.0109	0.00886			2.5483	0.0299	2.7957	0.031	3.1468	0.0346	2.7234	0.0302	2.6824
	ALA-153	2.2215	0.0483	2.722	0.0427	4.3282	0.0445	3.858	0.0539	4.0143	0.0688	3.4288			0.8036	0.0485	0.5824	0.0414	-0.0973	0.0549	-0.1207	0.0522	0.7439	0.1028	0.38238			0.0034	0.0078	-0.0067	0.0066	-0.0285	0.0089	-0.0013	0.0077	-0.2811	0.0155	-0.06284			3.0279	0.0447	3.3009	0.0386	4.2008	0.0426	3.7341	0.0572	4.4739
	GLN-154	-11.7203	0.2312	-10.3404	0.2366	-6.9686	0.1919	-9.7506	0.2553	-10.6084	0.2336	-9.87766			12.6182	0.2136	11.5847	0.2041	6.4302	0.1807	7.8278	0.2349	16.0474	0.2538	10.9017			-0.7107	0.0163	-0.6928	0.0184	-0.7782	0.0161	-0.7777	0.019	-1.4192	0.0157	-0.87572			0.1954	0.1769	0.5652	0.2046	-1.317	0.1924	-2.709	0.2428	4.0368
	SER-155	1.5714	0.0539	1.6935	0.0498	0.8195	0.1189	1.3325	0.0791	-4.6636	0.1617	0.15066			-0.4219	0.0342	-0.6445	0.0399	-0.3012	0.0462	-0.4985	0.0639	1.7053	0.1	-0.03216			0.0683	0.011	0.0376	0.0091	-0.0084	0.0149	-0.0285	0.0127	-0.0555	0.0093	0.0027			1.218	0.0451	1.0886	0.0489	0.5083	0.0967	0.8058	0.0558	-3.0215
	THR-156	-18.7336	0.2458	-17.6167	0.2415	-21.1634	0.2235	-15.1362	0.4381	-18.8846	0.3303	-18.3069			15.909	0.1847	16.0551	0.2068	17.5055	0.1529	13.5596	0.3017	16.1607	0.3393	15.838			-0.9444	0.0178	-0.9151	0.0191	-1.336	0.0148	-1.0765	0.0228	-1.1718	0.0185	-1.08876			-3.7648	0.1954	-2.4743	0.2156	-4.9857	0.1943	-2.6365	0.2169	-3.9049
	SER-157	-4.2757	0.2755	-2.6875	0.2389	-11.9559	0.4079	-12.7566	0.3678	-7.0438	0.2711	-7.7439			4.1057	0.2522	2.2486	0.1939	7.0957	0.2805	8.8524	0.3975	4.9718	0.3248	5.45484			-0.4272	0.0153	-0.3998	0.0129	-0.2327	0.0139	-0.362	0.0179	-0.0764	0.0159	-0.29962			-0.5954	0.1487	-0.8407	0.1643	-5.0993	0.1729	-4.2748	0.1987	-2.1476
	GLY-158	4.4147	0.1315	5.245	0.1058	-1.3683	0.0696	-1.3553	0.0892	0.0427	0.185	1.39576			-3.2087	0.102	-4.1621	0.0993	0.8441	0.0485	0.7884	0.0531	-0.0813	0.204	-1.16392			-0.0153	0.0087	-0.0202	0.0067	0.0062	0.0105	0.0147	0.0081	-0.0662	0.0085	-0.01616			1.1894	0.0794	1.0651	0.0726	-0.5202	0.0466	-0.5567	0.0642	-0.096
	ASN-159	-48.4119	0.31	-48.5751	0.2694	-22.4111	0.2944	-24.2606	0.4227	-32.402	0.4348	-35.2121			56.4816	0.2762	55.8643	0.296	23.0246	0.2851	23.9162	0.392	32.717	0.4656	38.4007			-1.5364	0.0151	-1.5968	0.0156	-0.4948	0.0123	-0.6855	0.0149	-1.14	0.0195	-1.0907			6.5274	0.2389	5.6721	0.2787	0.1267	0.2142	-1.0432	0.2433	-0.8264
	THR-160	-7.0873	0.2557	-17.2595	0.8577	-0.8444	0.0664	-1.9304	0.083	-25.9042	0.1859	-10.6052			6.1701	0.2812	12.6621	0.5966	0.1679	0.0595	0.765	0.0631	19.3082	0.1852	7.81466			-0.0757	0.0081	-0.1928	0.012	-0.0124	0.0055	-0.007	0.0058	-0.512	0.0105	-0.15998			-0.9833	0.1111	-4.7996	0.3253	-0.689	0.057	-1.177	0.0748	-7.1022
	MET-161	-1.2468	0.1191	-2.2437	0.0833	-0.6584	0.0406	-0.6409	0.0604	0.2077	0.0944	-0.91642			0.8134	0.0565	1.371	0.0561	0.4668	0.0341	0.451	0.032	0.314	0.0592	0.68324			0.0058	0.0123	-0.0067	0.0133	-0.0141	0.0118	0.0211	0.0103	0.0417	0.0144	0.00956			-0.4282	0.0827	-0.8815	0.0588	-0.2048	0.0491	-0.1707	0.0667	0.5623
	ARG-162	-80.1043	1.0273	-96.9707	1.1706	-69.4791	0.5074	-64.4262	0.8113	-64.348	0.4683	-75.0657			9.4201	0.9206	19.3281	1.1088	2.0449	0.2055	-4.0986	0.6594	2.2753	0.3136	5.79396			-0.0755	0.0157	-0.1487	0.0188	0.0051	0.0068	-0.0583	0.0124	-0.021	0.0093	-0.05968			-70.7522	0.4221	-77.7218	0.4245	-67.4246	0.4109	-68.5818	0.5313	-62.0751
	MET-163	-22.3702	0.3446	-22.9655	0.341	-5.9187	0.2845	-7.6977	0.3848	-20.2219	0.3241	-15.8348			16.7414	0.2981	16.1434	0.2643	4.1347	0.2171	5.9111	0.2854	13.6071	0.3162	11.3075			-1.3728	0.0224	-1.3522	0.02	-0.7445	0.0272	-0.7696	0.0298	-1.1847	0.0225	-1.08476			-7.0123	0.1478	-8.1659	0.1692	-2.5265	0.1546	-2.543	0.178	-7.789
	LEU-164	-5.8437	0.0614	-6.549	0.0811	-3.3128	0.072	-3.3949	0.0704	-4.6816	0.0629	-4.7564			3.1992	0.0373	3.8779	0.0532	2.0974	0.0406	1.837	0.0492	3.1175	0.0415	2.8258			-0.0871	0.0187	-0.104	0.0207	-0.0845	0.0213	-0.1432	0.0195	-0.0121	0.0173	-0.08618			-2.7314	0.0617	-2.7771	0.0714	-1.3016	0.0677	-1.7087	0.0742	-1.5779
	GLY-165	-1.7721	0.0279	-2.1455	0.0366	-0.241	0.0322	0.3281	0.0522	-1.0423	0.0228	-0.97456			1.1044	0.0235	1.4572	0.0376	0.5811	0.018	-0.163	0.0364	0.8208	0.0232	0.7601			-0.0279	0.0079	-0.016	0.0054	0.0237	0.0082	0.0129	0.0063	-0.0149	0.0055	-0.00444			-0.6972	0.0264	-0.7054	0.0218	0.3634	0.029	0.1824	0.0321	-0.2345
	GLU-166	58.6878	0.8649	69.965	0.8044	85.8256	0.8141	50.1302	1.0441	63.7188	0.4787	65.6655			21.2372	1.6997	8.5164	1.5777	-4.6818	0.7151	56.1945	1.7091	2.1745	0.3491	16.6882			-0.3485	0.0246	-0.1786	0.0211	-0.1665	0.0158	-1.0291	0.0326	-0.0114	0.0081	-0.34682			79.5979	1.0283	78.3463	0.9452	80.9953	0.42	105.262	1.1936	65.8673
	ASP-167	53.0973	0.5222	57.6284	0.4764	64.0977	0.7754	62.1793	0.7688	61.6719	0.6453	59.7349			49.7977	0.5466	49.4415	0.5647	50.2106	0.6837	55.3324	0.7084	43.3469	0.6767	49.6258			-0.8361	0.0105	-0.8339	0.0123	-0.7899	0.0111	-0.9033	0.0138	-0.4695	0.0127	-0.76654			102.027	0.4029	106.255	0.4549	113.549	0.397	116.604	0.5677	104.576
	TYR-168	-0.5743	0.0289	-0.5834	0.0347	0.1453	0.0446	0.5259	0.0497	0.3802	0.0356	-0.02126			-0.8186	0.0273	-0.5755	0.0363	-0.4615	0.0442	-1.2242	0.0421	-0.7484	0.026	-0.76564			0.0093	0.0059	0.0022	0.0082	-0.0198	0.0096	-0.0011	0.01	0.0002	0.0074	-0.00184			-1.3843	0.0303	-1.162	0.0372	-0.3346	0.0578	-0.6953	0.0644	-0.3687
	GLY-169	-0.5756	0.0208	0.118	0.0322	-1.2749	0.0334	-1.619	0.0591	-0.5219	0.0199	-0.77468			-0.1068	0.0219	0.0352	0.0218	-0.077	0.0206	0.1351	0.0435	-0.149	0.0222	-0.0325			0.0025	0.0071	0.0132	0.0063	-0.0029	0.0046	0.0166	0.0042	-0.0205	0.0072	0.00178			-0.6811	0.0273	0.166	0.0399	-1.3551	0.0259	-1.4688	0.0338	-0.6891
	VAL-170	-0.7328	0.0258	-0.4639	0.0195	-0.7082	0.0571	-2.7787	0.1238	-0.975	0.0241	-1.13172			0.0437	0.0126	0.166	0.0224	0.0081	0.0302	1.1995	0.0728	0.0807	0.0277	0.2996			0.0167	0.0123	0.0204	0.0069	-0.0185	0.0053	-0.1633	0.0169	0.0113	0.0109	-0.02668			-0.6715	0.032	-0.2779	0.0285	-0.7175	0.0626	-1.7416	0.0906	-0.8844
	SER-171	-0.4746	0.0395	-0.469	0.0388	-0.6883	0.0501	-1.0895	0.0585	-0.6474	0.0402	-0.67376			0.6709	0.0545	0.4154	0.0523	0.061	0.0381	0.1315	0.0408	0.002	0.049	0.25616			-0.0106	0.0048	0.0052	0.0081	0.0041	0.0044	0.0054	0.0031	-0.013	0.009	-0.00178			0.1851	0.0672	-0.0505	0.0635	-0.6235	0.0547	-0.9534	0.0643	-0.6579
	TYR-172	0.3246	0.0369	0.1951	0.04	-1.1285	0.0536	-1.5458	0.0674	0.386	0.0411	-0.35372			-0.1014	0.0501	-0.1535	0.0433	0.1826	0.0463	-0.0011	0.0555	-0.2771	0.0361	-0.0701			0.0012	0.0065	0.0024	0.0073	0.0147	0.0091	0.0182	0.0069	-0.014	0.0088	0.0045			0.223	0.0534	0.0435	0.0531	-0.9324	0.0655	-1.5281	0.0675	0.0956
	THR-173	0.2946	0.0236	0.0922	0.0333	-0.3721	0.0275	-0.4227	0.0264	0.2917	0.0296	-0.02326			0.2712	0.0389	0.1535	0.0502	0.1799	0.0377	0.1708	0.0362	-0.0365	0.0373	0.14778			-0.0059	0.006	0.0083	0.0081	0.0101	0.0065	0.0029	0.0063	-0.0049	0.0077	0.0021			0.5618	0.0469	0.2529	0.0585	-0.183	0.0492	-0.2491	0.0457	0.2533
	HIS-174	0.7846	0.0289	0.5492	0.0353	-2.0887	0.047	-2.4337	0.0721	0.9278	0.0522	-0.45216			-0.1005	0.0283	-0.0343	0.0293	0.1351	0.0279	0.2772	0.0367	-0.2017	0.0515	0.01516			0.0088	0.0094	0.0081	0.0103	0.0051	0.0082	0.0017	0.0096	-0.0277	0.0115	-0.0008			0.6918	0.0438	0.5221	0.0467	-1.946	0.057	-2.1538	0.07	0.6981
	PHE-175	-0.3272	0.0161	-0.4205	0.0174	-1.085	0.0201	-0.9304	0.0292	-0.1582	0.021	-0.58426			-0.098	0.0076	-0.036	0.0105	0.0379	0.0085	-0.0951	0.0124	-0.1486	0.0101	-0.06796			0.0231	0.0116	-0.0199	0.0112	-0.0092	0.0123	-0.0278	0.0132	-0.0215	0.0105	-0.01106			-0.4019	0.0195	-0.4762	0.0199	-1.0555	0.0236	-1.0538	0.0315	-0.3298
	ARG-176	-57.8102	0.287	-59.1618	0.3322	-52.7971	0.2413	-51.8972	0.2904	-56.032	0.2701	-55.5397			1.524	0.1008	1.8321	0.1173	0.4579	0.0981	-1.7328	0.1161	1.4896	0.1214	0.71416			0.006	0.0089	-0.0057	0.006	0.0213	0.0126	0.0066	0.0108	-0.002	0.0086	0.00524			-56.2662	0.2387	-57.337	0.2721	-52.3251	0.2285	-53.6114	0.2747	-54.5356
	ARG-177	-41.8567	0.1432	-42.2354	0.1545	-43.2127	0.1772	-42.6887	0.2036	-42.3574	0.1364	-42.4702			0.5968	0.0723	0.9313	0.0818	0.1956	0.0668	-0.5125	0.0841	0.2125	0.0679	0.28474			0.0153	0.0077	0.0049	0.0079	0.0249	0.0099	-0.001	0.008	0.0027	0.0104	0.00936			-41.2505	0.1622	-41.3011	0.1687	-42.9889	0.1802	-43.1982	0.2026	-42.1442
	LEU-178	-0.4074	0.011	-0.4705	0.0112	-0.8376	0.0121	-0.7734	0.0174	-0.3384	0.0143	-0.56546			-0.0194	0.007	-0.0055	0.0069	-0.0599	0.0085	-0.1564	0.0118	-0.0418	0.0131	-0.0566			0.0274	0.0129	0.0079	0.0159	0.0112	0.015	0.0235	0.0164	-0.0307	0.0143	0.00786			-0.4001	0.0185	-0.4687	0.0197	-0.8857	0.0177	-0.9055	0.0251	-0.4112
	CYS-179	0.7726	0.0259	0.3547	0.0472	0.2793	0.0241	-0.118	0.0235	0.9073	0.0302	0.43918			-0.057	0.0108	-0.0599	0.0154	-0.1065	0.0103	-0.1844	0.0103	-0.5043	0.0132	-0.18242			0.009	0.0093	-0.0276	0.0113	0.008	0.0088	-0.0268	0.0089	-0.002	0.0119	-0.00788			0.7247	0.0236	0.2634	0.0402	0.1805	0.0246	-0.3298	0.0256	0.3992
	SER-180	0.1219	0.0325	0.0719	0.0341	-0.1848	0.0296	-0.284	0.032	0.1678	0.055	-0.02144			0.5052	0.0507	0.348	0.0541	0.2981	0.0524	-0.031	0.0464	-0.1109	0.0417	0.20188			0.0013	0.0065	0.0009	0.0078	0.0125	0.0065	-0.0004	0.0083	-0.0009	0.0053	0.00268			0.6303	0.0598	0.4214	0.063	0.1266	0.059	-0.3153	0.0591	0.054
	ARG-181	-38.1106	0.1141	-39.3405	0.1082	-37.3768	0.1187	-36.9774	0.1627	-40.5382	0.1769	-38.4687			0.3656	0.0628	0.4015	0.0689	-0.079	0.0769	-0.6593	0.0753	0.4955	0.0673	0.10486			0.0234	0.0154	0.0161	0.0141	-0.0189	0.0183	-0.0293	0.0141	-0.0036	0.0091	-0.00246			-37.7205	0.1163	-38.924	0.1207	-37.475	0.1268	-37.6615	0.1563	-40.0674
	ALA-182	-0.0177	0.0196	0.0483	0.0165	-0.2289	0.0259	-0.3286	0.0206	-0.5476	0.0209	-0.2149			-0.0665	0.0111	-0.0848	0.0091	-0.0963	0.0127	-0.0941	0.0151	0.1038	0.024	-0.04758			-0.0135	0.0099	-0.0207	0.0121	-0.0258	0.0143	0.0632	0.0146	-0.0339	0.0124	-0.00614			-0.0984	0.0221	-0.0569	0.0191	-0.3519	0.0277	-0.3593	0.0291	-0.4761
	LEU-183	-0.359	0.0211	-0.4457	0.0223	-0.4593	0.0172	-0.5534	0.0156	-0.631	0.0363	-0.48968			0.1857	0.0209	0.1992	0.0226	0.1237	0.0246	-0.0133	0.0254	0.2168	0.0246	0.14242			-0.031	0.0134	-0.0042	0.0151	-0.0151	0.0152	-0.0216	0.0131	-0.0257	0.0167	-0.01952			-0.2013	0.0326	-0.25	0.0332	-0.3502	0.0334	-0.5892	0.0314	-0.4382
	GLY-184	-0.6384	0.0292	-0.8217	0.0231	-0.6515	0.0234	-0.7003	0.0226	0.2507	0.0621	-0.51224			0.2873	0.0243	0.4146	0.0264	0.2676	0.0295	0.0537	0.03	0.0319	0.0347	0.21102			-0.0354	0.0087	-0.0244	0.011	-0.0283	0.0088	0.002	0.0089	0.006	0.0047	-0.01602			-0.3845	0.0379	-0.432	0.0338	-0.4115	0.0383	-0.6444	0.0338	0.2861
	GLY-185	0.0872	0.0281	-0.0946	0.0246	-0.0151	0.0221	-0.1574	0.0205	0.8673	0.0537	0.13748			0.0976	0.0226	0.1018	0.0254	0.1058	0.0226	0.0546	0.0237	-0.0672	0.0367	0.05852			0.0071	0.0037	0.0162	0.0063	0.003	0.0062	-0.0065	0.0063	0.005	0.0035	0.00496			0.1915	0.0371	0.0244	0.0328	0.0938	0.031	-0.109	0.032	0.8027
	LYS-186	-63.438	0.3761	-68.2658	0.4341	-49.2904	0.1854	-50.6035	0.2566	-57.1044	0.2944	-57.7404			1.5707	0.1429	1.9141	0.1472	1.0159	0.1355	0.5189	0.1419	0.7944	0.138	1.1628			0.0087	0.0077	0.0179	0.0069	-0.0075	0.0061	0.0005	0.0068	0.0073	0.0091	0.00538			-61.8533	0.4021	-66.3437	0.4438	-48.2757	0.2342	-50.0807	0.2999	-56.3059
	ALA-187	-0.9632	0.0376	-0.9795	0.0435	0.5127	0.0217	0.3705	0.0234	-0.3097	0.0559	-0.27384			0.4957	0.0258	0.6638	0.0347	-0.2312	0.0234	-0.1272	0.0319	-0.2207	0.0393	0.11608			-0.001	0.0076	0.0127	0.0092	0.0039	0.0075	0.0099	0.0063	0.0037	0.0067	0.00584			-0.4699	0.0407	-0.3023	0.0356	0.2853	0.0311	0.2533	0.0318	-0.5247
	LYS-188	-124.247	0.8388	-136.139	1.2107	-75.5306	0.4263	-77.9337	0.4172	-122.876	1.4874	-107.345			24.9403	1.0969	39.0791	1.6601	3.0034	0.2019	1.0013	0.1669	38.4997	1.8378	21.3048			-0.1081	0.0128	-0.1689	0.0134	0.009	0.0076	0.0123	0.0073	-0.2313	0.0169	-0.0974			-99.436	0.5215	-97.2155	0.6753	-72.5229	0.3832	-76.9463	0.4202	-84.5347
	SER-189	0.7882	0.0603	0.3828	0.0783	0.9575	0.0417	0.9073	0.0442	0.2323	0.0757	0.65362			0.4109	0.0463	0.2747	0.0487	0.0335	0.048	0.0466	0.0513	-0.2253	0.0521	0.10808			0.0134	0.007	0.0086	0.0085	-0.0062	0.0065	0.0083	0.0072	0.0134	0.0099	0.0075			1.2131	0.0669	0.6661	0.0834	0.986	0.065	0.9641	0.0689	0.0174
	GLU-190	56.3703	0.1364	60.1923	0.1477	51.3667	0.1279	51.8477	0.1311	55.395	0.198	55.0344			-1.0238	0.108	-2.126	0.1259	-1.2851	0.1362	0.3335	0.145	-3.5869	0.126	-1.53766			0.0232	0.01	-0.0215	0.0115	0.0364	0.0134	-0.0045	0.0069	-0.0059	0.0097	0.00554			55.3745	0.1566	58.0348	0.1562	50.113	0.1601	52.1595	0.1587	51.8008
	LEU-191	-0.4137	0.0269	-0.8742	0.0345	0.8617	0.0273	0.4725	0.0375	-0.738	0.0406	-0.13834			0.1355	0.0145	0.4165	0.0173	-0.4633	0.0124	-0.4783	0.0156	0.0356	0.0206	-0.0708			0.0485	0.016	0.0455	0.0174	0.0205	0.0217	0.0224	0.017	-0.0214	0.0162	0.0231			-0.2298	0.0331	-0.4107	0.0314	0.4199	0.0333	0.0157	0.0448	-0.7274
	ARG-192	-87.8509	0.6581	-96.7332	0.8081	-75.1689	0.6777	-90.5073	0.8391	-96.3297	0.8869	-89.318			3.9709	0.1438	7.4522	0.2106	4.5957	0.1722	6.1336	0.2702	12.5278	0.4967	6.93604			-0.0059	0.0107	-0.0227	0.0101	-0.0379	0.0109	0.0508	0.0112	-0.0296	0.0121	-0.00906			-83.9015	0.5794	-89.3046	0.634	-70.6153	0.5604	-84.2762	0.6266	-83.7857
	ASN-193	1.7206	0.0508	1.4256	0.0952	1.8964	0.0434	1.5613	0.0636	0.5711	0.0864	1.435			-0.2528	0.066	-0.2525	0.0675	-0.7212	0.056	-0.7362	0.0623	-0.4072	0.0615	-0.47398			0.0207	0.0107	-0.0077	0.0109	-0.0008	0.0098	-0.0047	0.0109	-0.0201	0.0128	-0.00252			1.4868	0.0775	1.165	0.113	1.1709	0.0654	0.8191	0.078	0.1397
	TRP-194	0.3837	0.0326	0.7765	0.0367	-0.3572	0.0433	1.5164	0.0324	0.5825	0.0424	0.58038			-1.0469	0.0155	-0.9097	0.0139	-0.8755	0.0166	-1.1433	0.0195	-0.576	0.026	-0.91028			-0.0093	0.012	-0.047	0.0138	-0.0237	0.0124	0.0199	0.0146	0.0085	0.0122	-0.01032			-0.6734	0.0378	-0.18	0.0375	-1.2565	0.0424	0.3931	0.0333	0.0157
	ARG-195	-107.104	0.3749	-117.128	0.4779	-116.18	0.3781	-117.52	0.3672	-116.228	0.5146	-114.832			18.4192	0.333	23.4888	0.4292	19.7635	0.3228	24.7854	0.4868	26.3473	0.3347	22.5608			-0.013	0.0109	-0.0363	0.009	-0.023	0.0101	-0.0134	0.0095	-0.0549	0.0161	-0.02812			-88.6957	0.3006	-93.6791	0.2794	-96.4595	0.4076	-92.7639	0.4283	-89.9521
	MET-196	1.4557	0.0508	0.0124	0.0923	2.0952	0.0532	2.1974	0.0465	0.6569	0.083	1.28352			-1.6565	0.0395	-0.7698	0.0296	-1.3463	0.0322	-1.9665	0.0423	-1.0238	0.0476	-1.35258			-0.0042	0.0099	-0.0053	0.0096	0.0012	0.0117	0.0021	0.0124	0.0026	0.0116	-0.00072			-0.2046	0.045	-0.7628	0.0722	0.7497	0.0349	0.2364	0.044	-0.3637
	ALA-197	-0.439	0.0277	-0.2764	0.0293	-0.4029	0.0343	-0.473	0.0332	-1.1153	0.0382	-0.54132			-0.8256	0.0164	-0.7546	0.0181	-0.6879	0.0198	-0.7638	0.0203	-0.1587	0.0215	-0.63812			-0.0203	0.0122	-0.051	0.011	-0.0084	0.0135	-0.0668	0.0154	0.0542	0.0153	-0.01846			-1.2848	0.0226	-1.081	0.022	-1.0992	0.0243	-1.3057	0.0264	-1.2182
	GLN-198	0.0813	0.1581	0.601	0.1681	-0.0772	0.2117	1.1977	0.2018	4.4158	0.2546	1.24372			-2.129	0.096	-2.4956	0.098	-2.639	0.1155	-2.9599	0.1258	-3.6125	0.2111	-2.7672			-0.0166	0.0079	0.001	0.0077	-0.0053	0.0074	-0.0189	0.0084	-0.0135	0.0127	-0.01066			-2.0722	0.11	-1.8941	0.1219	-2.7253	0.1376	-1.7858	0.1457	0.7889
	SER-199	0.4971	0.0689	0.2553	0.0467	-0.0473	0.0603	0.1692	0.0647	0.842	0.0869	0.34326			-0.7565	0.0606	-0.6256	0.0401	-0.6952	0.0489	-0.5482	0.0557	-0.8755	0.0668	-0.7002			0.0155	0.004	-0.0071	0.0054	0.0012	0.0075	-0.0097	0.0078	-0.0116	0.0061	-0.00234			-0.2406	0.0312	-0.3787	0.0397	-0.7422	0.0371	-0.3844	0.0399	-0.0419
	LEU-200	-0.3018	0.0338	0.0366	0.0359	0.084	0.0355	0.1149	0.0311	0.0725	0.0369	0.00124			-0.933	0.0207	-0.9079	0.0201	-0.9845	0.0226	-1.0048	0.0204	-0.6872	0.022	-0.90348			0.0025	0.0174	0.0154	0.0167	-0.0092	0.0124	-0.0525	0.013	0.0218	0.0146	-0.0044			-1.232	0.0263	-0.8563	0.0262	-0.9108	0.0233	-0.9433	0.0228	-0.5944
	LEU-201	-2.6846	0.0476	-2.1834	0.0569	-2.9801	0.0672	-2.682	0.0551	-2.6394	0.0647	-2.6339			0.1168	0.0291	0.1294	0.0334	0.1448	0.0505	0.1085	0.0411	0.3757	0.0459	0.17504			-0.0025	0.0141	0.0044	0.0189	-0.0044	0.015	-0.0037	0.0154	-0.0447	0.0195	-0.01018			-2.5704	0.0339	-2.0523	0.0398	-2.8381	0.0367	-2.5784	0.0358	-2.3081
	ASN-202	-18.1924	0.3426	-21.7274	0.2806	-26.6585	0.5881	-19.3778	0.315	-19.1399	0.3385	-21.0192			24.2014	0.4807	29.6729	0.327	31.0689	0.4108	27.2733	0.3466	25.6494	0.4348	27.5732			-0.52	0.0141	-0.7031	0.0155	-0.844	0.0157	-0.7937	0.0157	-0.716	0.021	-0.71536			5.4909	0.2173	7.2542	0.1771	3.5573	0.3334	7.1264	0.1933	5.7914
	SER-203	-2.7407	0.0488	-0.4499	0.0702	0.5971	0.0851	0.8625	0.0567	-0.6553	0.054	-0.47726			1.2214	0.0552	0.0473	0.0602	-1.161	0.0727	-1.0937	0.0554	-1.033	0.0561	-0.4038			0.0106	0.011	-0.0232	0.0094	-0.016	0.0078	-0.0027	0.0083	0.0109	0.0078	-0.00408			-1.5061	0.0453	-0.4216	0.0384	-0.5778	0.0557	-0.2332	0.0451	-1.6744
	VAL-204	-2.4711	0.0668	-1.5737	0.057	0.3275	0.0758	0.2251	0.0725	0.7256	0.0848	-0.55332			0.7819	0.0401	0.9054	0.0424	-1.661	0.0806	-0.5097	0.0665	-1.8553	0.0908	-0.46774			-0.0433	0.0097	-0.0077	0.0091	-0.0282	0.009	-0.0083	0.0086	-0.0126	0.0098	-0.02002			-1.7338	0.0466	-0.6721	0.04	-1.3634	0.0531	-0.2921	0.0424	-1.1394
	GLU-205	56.1225	0.9275	48.13	0.8941	7.1648	1.2016	17.8135	1.0821	-15.1653	1.2793	22.8131			12.9028	1.036	-9.9466	0.454	23.2114	1.7587	9.7685	1.4949	61.7488	1.8269	19.537			-1.7111	0.0169	-0.5241	0.0207	-1.1137	0.0308	-0.6633	0.0261	-1.305	0.0261	-1.06344			67.3416	0.7059	37.6333	0.6815	29.2936	0.8879	26.873	0.7821	45.2795
	GLY-206	-8.1782	0.097	-7.7175	0.1022	-9.2252	0.2033	-8.0102	0.179	-10.1206	0.1914	-8.65034			4.9495	0.0577	4.836	0.0547	8.2159	0.3578	5.6729	0.2452	7.1998	0.2534	6.17482			-0.3204	0.0053	-0.3595	0.0065	-1.0327	0.0153	-1.0131	0.015	-0.9094	0.0112	-0.72702			-3.5484	0.0894	-3.2468	0.0891	-2.0499	0.2513	-3.3646	0.1549	-3.8266
	HIS-207	-58.4917	0.2228	-59.3265	0.26	-55.6094	0.2721	-54.3596	0.2249	-54.7027	0.2356	-56.498			58.8287	0.208	57.7116	0.1913	48.924	0.2051	46.933	0.175	47.4633	0.1934	51.9721			-1.8404	0.0172	-1.8862	0.0171	-1.2729	0.0201	-1.2624	0.0159	-1.1353	0.0145	-1.47944			-1.5066	0.2671	-3.5147	0.286	-7.9637	0.2945	-8.7001	0.2673	-8.3963
	GLU-208	68.9157	0.6414	68.8302	0.657	69.3973	0.4209	51.0856	0.9391	41.6359	0.5049	59.9729			5.477	0.8242	12.0314	0.9477	-0.2283	0.4976	41.0812	1.1564	51.608	0.6929	21.9939			-0.516	0.0157	-0.5979	0.0161	-0.5249	0.0154	-1.1783	0.0191	-1.1345	0.0188	-0.79032			73.8556	0.5013	80.2871	0.6116	68.6607	0.3899	90.9226	0.534	92.1072
	ASN-209	1.1188	0.0979	1.882	0.0989	1.1793	0.0764	1.5688	0.0832	0.7385	0.1229	1.29748			-0.6792	0.0704	-1.1456	0.0809	-0.4234	0.0737	-1.3561	0.0771	-1.607	0.0792	-1.04226			-0.0165	0.0106	-0.0178	0.0088	-0.001	0.0088	0.0036	0.0064	0.0105	0.0075	-0.00424			0.4224	0.106	0.7221	0.1076	0.7575	0.0889	0.2161	0.0913	-0.8637
	ILE-210	2.7535	0.0226	3.1083	0.0255	2.6462	0.0235	2.5292	0.0277	2.7939	0.0269	2.76622			-1.8417	0.0342	-1.7942	0.04	-1.0773	0.0362	-1.381	0.0331	-1.8527	0.029	-1.58938			-0.0027	0.0199	0.0427	0.0177	-0.0689	0.0207	-0.0357	0.0184	0.023	0.0213	-0.00832			0.9079	0.0364	1.3564	0.0374	1.4998	0.0377	1.1133	0.0342	0.965
	THR-211	2.5757	0.0541	2.8357	0.061	2.3089	0.0464	2.6874	0.0608	2.6387	0.0685	2.60928			-0.9447	0.0411	-0.8886	0.0547	-0.2122	0.046	-0.8351	0.0478	-1.2184	0.0467	-0.8198			0.0156	0.0108	-0.0115	0.0094	0.0489	0.0139	-0.0086	0.0161	-0.0083	0.0125	0.00722			1.6492	0.0709	1.9414	0.0821	2.1437	0.0624	1.8451	0.0771	1.4138
	GLN-212	-8.8002	0.1605	-7.0646	0.1638	-7.3768	0.1754	-10.4958	0.2862	-13.6899	0.2618	-9.48546			4.9307	0.1711	4.9261	0.2189	6.2877	0.1706	10.867	0.5065	13.0039	0.3697	8.00308			-0.7691	0.0126	-0.789	0.0136	-0.873	0.0151	-0.9973	0.0181	-0.9266	0.0152	-0.871			-4.6425	0.1602	-2.9386	0.1914	-1.9538	0.1647	-0.6181	0.3214	-1.5987
	LEU-213	0.4319	0.0567	-0.7681	0.0673	1.4875	0.0745	1.5128	0.0599	1.3878	0.0683	0.81038			-2.9958	0.0425	-2.5048	0.0431	-2.3213	0.0389	-2.6803	0.04	-2.6583	0.0453	-2.6321			-0.0474	0.0109	-0.0602	0.0153	-0.0194	0.0094	-0.0186	0.0096	0.0079	0.0098	-0.02754			-2.6125	0.0554	-3.3338	0.0591	-0.8503	0.0649	-1.1889	0.0581	-1.2602
	ALA-214	2.0541	0.0569	1.6057	0.0562	2.8194	0.0525	2.6665	0.0464	2.7225	0.0613	2.37364			-1.3249	0.04	-1.2826	0.0394	-0.7158	0.041	-0.9856	0.0419	-0.3101	0.0516	-0.9238			-0.0135	0.0055	0.0012	0.003	0.0174	0.0094	-0.0043	0.0048	0.0153	0.008	0.00322			0.7155	0.0553	0.3259	0.0542	2.1203	0.0529	1.6745	0.0446	2.4272
	VAL-215	-5.5046	0.1715	-6.4068	0.2023	-7.6654	0.2458	-2.1413	0.1116	-1.6696	0.1427	-4.67754			2.4319	0.1138	3.206	0.1369	2.4925	0.1336	0.7212	0.0913	1.1349	0.1096	1.9973			-1.131	0.0211	-1.0616	0.0228	-1.7475	0.03	-0.8998	0.0221	-0.9335	0.0239	-1.15468			-4.2102	0.128	-4.2571	0.1222	-6.9234	0.1846	-2.322	0.09	-1.4726
	ASN-216	-35.5666	0.2139	-35.3612	0.2146	-26.4684	0.4637	-31.7049	0.2013	-33.6629	0.2197	-32.5528			36.7889	0.2784	35.6435	0.248	30.3198	0.4351	31.8859	0.2298	33.8387	0.2754	33.6954			-1.9847	0.0217	-2.0092	0.0224	-1.0309	0.0319	-1.7541	0.0236	-1.9225	0.0222	-1.74028			-0.7682	0.2509	-1.7346	0.2478	2.8444	0.2712	-1.5771	0.2105	-1.7399
	HIS-217	-30.2056	0.2302	-31.0778	0.1913	-24.0515	0.6432	-27.9409	0.2504	-27.4435	0.2417	-28.1439			30.6721	0.237	31.0535	0.2034	26.5318	0.7905	29.4064	0.2314	30.0499	0.2749	29.5427			-0.5444	0.0152	-0.6672	0.0133	-0.3733	0.0339	-0.5635	0.0177	-0.7147	0.017	-0.57262			-0.0786	0.1814	-0.6955	0.1846	2.1307	0.2009	0.8949	0.2435	1.9062
	GLY-218	-3.5559	0.0739	-3.1085	0.0761	0.7629	0.0765	1.7892	0.0722	-3.7409	0.0872	-1.57064			3.0122	0.0761	2.245	0.0765	1.0732	0.049	0.4622	0.0397	2.6815	0.1131	1.89482			-0.1841	0.0115	-0.1571	0.0125	-0.0119	0.0099	0.0012	0.0065	-0.5692	0.0204	-0.18422			-0.7266	0.0849	-1.0195	0.0841	1.8191	0.062	2.252	0.0801	-1.6283
	TYR-219	-0.3446	0.0761	-0.9698	0.0838	-1.4169	0.0627	-0.4597	0.1279	-0.9644	0.0737	-0.83108			1.879	0.0515	1.9351	0.0491	-0.142	0.0343	-0.4681	0.0511	1.2034	0.0505	0.88148			0.0035	0.0079	-0.0064	0.008	-0.0114	0.0096	0.0309	0.009	0.0213	0.0104	0.00758			1.5409	0.0666	0.9601	0.0706	-1.5682	0.0548	-0.8941	0.1258	0.262
	SER-220	-1.3481	0.141	-1.6614	0.1446	-0.7623	0.0966	-2.2679	0.1307	-2.3132	0.1363	-1.67058			0.5187	0.0635	0.5072	0.0775	0.4	0.0607	0.3921	0.0776	0.371	0.0761	0.4378			0.0112	0.0061	-0.0103	0.0059	-0.0046	0.0081	-0.0179	0.0087	-0.0087	0.008	-0.00606			-0.8124	0.1325	-1.1633	0.1477	-0.3638	0.1129	-1.895	0.1361	-1.956
	SER-221	-3.7394	0.1006	-3.8597	0.1011	-0.8247	0.0584	-1.0871	0.0518	-3.3718	0.074	-2.57654			0.2687	0.0537	0.3058	0.0546	-0.1014	0.0412	-0.1095	0.0419	-0.3246	0.0547	0.0078			0.0026	0.0042	-0.0032	0.0041	-0.004	0.006	0.0102	0.0054	0.0091	0.004	0.00294			-3.47	0.1072	-3.5521	0.1015	-0.9305	0.0783	-1.1859	0.0611	-3.6876
	PRO-222	-1.3903	0.0216	-1.5845	0.0273	-0.7833	0.0239	-0.7011	0.0225	-1.334	0.0231	-1.15864			-0.2818	0.007	-0.2688	0.0075	-0.3405	0.0069	-0.351	0.0077	-0.3482	0.0085	-0.31806			0.0122	0.0073	0.0005	0.0076	0.0314	0.0079	-0.0009	0.0085	-0.0264	0.0099	0.00336			-1.6602	0.0211	-1.8527	0.0238	-1.0917	0.0209	-1.0532	0.0227	-1.7077
	SER-223	-2.025	0.0727	-1.6921	0.0762	-0.9525	0.0633	-0.8629	0.0674	-1.5753	0.0776	-1.42156			0.3318	0.0468	0.1406	0.0564	0.0266	0.0517	-0.1298	0.0485	-0.2978	0.0517	0.01428			-0.0058	0.0045	-0.0025	0.007	0.005	0.0054	0.0033	0.0048	0.0068	0.0062	0.00136			-1.6996	0.0853	-1.5544	0.0879	-0.9231	0.0798	-0.9942	0.0739	-1.8697
	HIS-224	-3.4569	0.0832	-2.1553	0.1458	-2.5345	0.0872	-0.5155	0.1592	-0.9996	0.1814	-1.93236			0.7924	0.0488	0.3296	0.0685	0.488	0.0543	-0.1509	0.065	-0.3032	0.0688	0.23118			0.0004	0.0065	0.0089	0.006	-0.0049	0.0084	0.0178	0.0076	0.0216	0.0079	0.00876			-2.6589	0.0859	-1.8183	0.1442	-2.049	0.0973	-0.6473	0.1489	-1.2824
	PHE-225	-2.1738	0.027	-2.4037	0.0327	-1.8826	0.0308	-2.0792	0.0297	-2.3301	0.031	-2.17388			0.3002	0.0141	0.3481	0.0166	0.115	0.0121	0.2527	0.0164	0.2624	0.0173	0.25568			0.0149	0.0086	-0.0218	0.0107	-0.0125	0.0137	-0.0096	0.0124	0.0084	0.014	-0.00412			-1.858	0.0213	-2.0774	0.0245	-1.7814	0.0274	-1.837	0.0246	-2.0585
	SER-226	-1.9475	0.0317	-2.181	0.0317	-1.5828	0.0359	-1.7251	0.0433	-2.2348	0.0464	-1.93424			-0.2366	0.0223	-0.2039	0.0235	-0.2684	0.0341	-0.1117	0.0371	-0.1692	0.0332	-0.19796			0.0213	0.0069	-0.0059	0.0072	0.0235	0.0094	0.0178	0.0111	0.0031	0.0104	0.01196			-2.1608	0.0373	-2.3889	0.0296	-1.8307	0.0452	-1.8215	0.0527	-2.3993
	SER-227	-0.9431	0.0246	-1.476	0.0556	-0.9713	0.0398	-1.3533	0.0517	-1.53	0.0533	-1.25474			0.2003	0.0371	0.2842	0.0388	-0.0098	0.0417	0.034	0.0407	0.1121	0.042	0.12416			0.0021	0.0071	-0.0126	0.007	-0.0001	0.0083	0.0109	0.009	0.013	0.0076	0.00266			-0.7395	0.0413	-1.2067	0.0563	-0.978	0.0539	-1.3078	0.0537	-1.4052
	GLU-228	79.5687	0.2617	82.7303	0.3555	72.0515	0.2096	77.1075	0.3451	78.8281	0.591	78.0572			-2.9707	0.1294	-2.8425	0.1411	-3.0564	0.1105	-3.6983	0.1561	-4.7727	0.1989	-3.46812			-0.0213	0.0088	0.0052	0.0099	-0.0068	0.0061	0.0154	0.008	-0.0064	0.0099	-0.00278			76.5727	0.2371	79.8901	0.3185	68.9803	0.1982	73.4369	0.3105	74.0023
	ILE-229	-1.6953	0.0153	-1.8744	0.0151	-1.6214	0.0168	-1.7664	0.0166	-1.9977	0.0204	-1.79104			0.362	0.0071	0.3681	0.0073	0.2028	0.0072	0.3363	0.0078	0.3064	0.0097	0.31512			-0.0314	0.0173	0.0168	0.018	-0.082	0.0163	-0.05	0.0161	0.0602	0.0209	-0.01728			-1.365	0.0212	-1.4889	0.0199	-1.5006	0.0212	-1.4796	0.0208	-1.6327
	LYS-230	-66.5705	0.1974	-72.3127	0.1993	-63.5636	0.1737	-63.6535	0.231	-68.3126	0.2726	-66.8826			5.101	0.1058	5.1495	0.1142	3.7692	0.1081	3.676	0.126	3.8974	0.136	4.31862			0.0187	0.0145	0.0126	0.0135	0.0085	0.0125	0.0157	0.0139	0.01	0.0142	0.0131			-61.4525	0.1818	-67.1472	0.1997	-59.7759	0.192	-59.9615	0.2275	-64.4109
	GLU-231	58.4613	0.1717	61.8506	0.2316	53.4426	0.1535	55.3861	0.2044	53.8741	0.2262	56.6029			0.2356	0.1278	0.1565	0.143	-0.4429	0.1372	-0.1682	0.1223	-1.1705	0.086	-0.2779			-0.0043	0.0076	-0.0251	0.0096	-0.0136	0.0113	0.0227	0.009	0.0082	0.0162	-0.00242			58.6855	0.2064	61.9843	0.2613	52.9853	0.2166	55.2423	0.2181	52.7096
	LEU-232	-1.5449	0.0163	-1.7435	0.0174	-1.6199	0.0155	-1.6042	0.0201	-1.7161	0.0233	-1.64572			0.4602	0.0234	0.4483	0.0255	0.4003	0.0199	0.4391	0.0253	0.4162	0.0222	0.43282			-0.0186	0.012	-0.03	0.0119	0.0123	0.0104	0.0346	0.011	-0.0112	0.0124	-0.00258			-1.1029	0.0285	-1.3266	0.0295	-1.2068	0.026	-1.1309	0.0297	-1.3125
	ILE-233	-1.4907	0.0103	-1.5882	0.0105	-1.4902	0.0117	-1.5473	0.013	-1.7058	0.0157	-1.56444			0.3308	0.0121	0.3044	0.0135	0.2514	0.0081	0.2767	0.0105	0.3469	0.0095	0.30204			-0.0227	0.0133	-0.0344	0.0154	-0.0161	0.0145	-0.0502	0.013	0.0566	0.0146	-0.01336			-1.1815	0.0198	-1.3175	0.0205	-1.2545	0.0192	-1.3204	0.0194	-1.3025
	GLY-234	-0.9675	0.0134	-1.0489	0.0165	-0.908	0.0122	-0.9086	0.0131	-0.7892	0.0155	-0.92444			0.2556	0.0072	0.2588	0.0087	0.2463	0.0056	0.2256	0.0054	0.2537	0.0053	0.248			-0.017	0.0057	-0.0071	0.0067	-0.0033	0.0038	-0.002	0.005	-0.0118	0.0046	-0.00824			-0.729	0.0144	-0.7973	0.0169	-0.6652	0.011	-0.6855	0.0123	-0.5476
	VAL-235	0.9508	0.0101	0.9837	0.0129	0.9324	0.011	0.9398	0.0108	1.0746	0.0116	0.97626			-0.2331	0.0088	-0.2069	0.0096	-0.1773	0.0088	-0.1906	0.0083	-0.2995	0.0081	-0.22148			0.0278	0.0111	0.0108	0.0106	0.0221	0.0108	0.0327	0.0119	0.0092	0.011	0.02052			0.7443	0.0146	0.7876	0.0146	0.7774	0.0146	0.7813	0.0159	0.7843
	SER-236	0.4138	0.0315	0.7644	0.0283	0.6338	0.0259	0.6278	0.0234	0.5894	0.021	0.60584			0.046	0.0344	-0.2309	0.0484	-0.2944	0.0363	-0.2813	0.0345	-0.3536	0.0333	-0.22284			0.0264	0.0082	-0.0138	0.0063	-0.0091	0.0065	0.0036	0.0081	-0.0164	0.0076	-0.00186			0.4893	0.0409	0.5203	0.0529	0.331	0.0435	0.3505	0.0368	0.2215
	PRO-237	-0.6165	0.0153	1.1619	0.0235	0.9138	0.0306	1.0133	0.025	-0.713	0.0193	0.3519			0.6681	0.0124	-1.0504	0.0118	-0.9905	0.0162	-0.9958	0.0146	0.7478	0.014	-0.32416			-0.0164	0.0149	0.0356	0.0191	-0.0427	0.0214	-0.0293	0.0205	-0.0116	0.0169	-0.01288			0.036	0.0226	0.1464	0.0259	-0.1185	0.0307	-0.0113	0.0276	0.0229
	ARG-238	-71.5283	0.4831	-77.3592	0.4622	-82.668	0.4705	-76.4873	0.3706	-89.784	0.4592	-79.5654			18.5801	0.3602	17.0868	0.2911	29.3837	0.614	19.1473	0.3187	38.0889	0.5101	24.4574			-0.0149	0.0109	-0.0214	0.008	-0.2909	0.0175	-0.0893	0.0123	-0.5156	0.0157	-0.18642			-52.9574	0.336	-60.2944	0.3596	-53.6272	0.3539	-57.424	0.314	-52.1849
	LYS-239	-46.0652	0.2645	-50.4955	0.3372	-49.4159	0.3018	-48.9381	0.2573	-54.2717	0.356	-49.8373			2.0596	0.1272	1.9855	0.1301	1.9457	0.1409	1.4843	0.1381	1.329	0.1319	1.76082			0.0033	0.0075	0.0027	0.0084	-0.0024	0.0095	0.0117	0.0079	-0.0127	0.0086	0.00052			-44.0035	0.2645	-48.4903	0.3543	-47.4759	0.2984	-47.4512	0.283	-52.9334
	LEU-240	-0.2111	0.0257	-0.4251	0.0284	-0.2767	0.022	-0.3229	0.0233	-0.5319	0.0315	-0.35354			0.1573	0.0142	0.2213	0.0169	0.1907	0.0201	0.1528	0.0198	0.1734	0.02	0.1791			-0.0201	0.0141	0.0253	0.0133	0.0065	0.0133	0.0069	0.0112	0.0049	0.0129	0.0047			-0.0744	0.0328	-0.1791	0.0328	-0.0787	0.0303	-0.1629	0.0258	-0.3541
	SER-241	-0.0502	0.022	-0.2037	0.0255	-0.2852	0.0248	-0.2104	0.0205	-0.3682	0.0238	-0.22354			0.4466	0.0477	0.4853	0.0493	0.3677	0.0531	0.149	0.0558	0.2133	0.0496	0.33238			-0.0001	0.0055	0.0065	0.0073	0.0046	0.0072	0.0156	0.0077	0.0048	0.0076	0.00628			0.3964	0.0513	0.2884	0.0536	0.0913	0.0613	-0.0407	0.0605	-0.1503
	ASN-242	0.4251	0.063	0.5531	0.066	0.3694	0.0689	0.4312	0.0719	0.4487	0.0644	0.4455			0.5212	0.0549	0.2825	0.0686	0.1279	0.0619	0.0836	0.0598	-0.0685	0.0641	0.18934			0.0199	0.0096	0.0039	0.0098	-0.0084	0.0098	-0.0083	0.0093	-0.0347	0.0091	-0.00552			0.9647	0.0851	0.8384	0.0847	0.4927	0.0902	0.505	0.0847	0.3461
	ILE-243	-0.1742	0.0051	-0.1432	0.0078	-0.1589	0.0056	-0.1536	0.0061	-0.0976	0.0075	-0.1455			0.3866	0.0321	0.352	0.0314	0.2809	0.032	0.1992	0.0283	0.1046	0.03	0.26466			0.0062	0.0082	0.0033	0.009	-0.0087	0.0096	-0.0034	0.0098	0.0026	0.0081	0			0.2195	0.0333	0.212	0.0332	0.1154	0.0341	0.0426	0.0319	0.0089
	ILE-244	-0.1198	0.019	-0.1682	0.0224	-0.6592	0.0106	-0.5394	0.0125	-0.0213	0.0191	-0.30158			0.2856	0.0241	0.2461	0.0242	0.3256	0.0133	0.264	0.0134	0.2181	0.0198	0.26788			0.0505	0.014	0.0272	0.0161	0.0033	0.0134	0.0121	0.0151	-0.0248	0.0118	0.01366			0.2155	0.0313	0.1055	0.0327	-0.3296	0.0215	-0.2625	0.0245	0.1727
	GLN-245	0.6134	0.0318	0.5788	0.0444	0.1073	0.0277	0.2146	0.0323	-1.1801	0.0768	0.0668			1.0873	0.077	0.8085	0.0802	0.5492	0.068	0.3763	0.064	0.2104	0.046	0.60634			-0.0059	0.0055	0.0085	0.0067	0.0011	0.0106	0.0048	0.0095	-0.0072	0.0093	0.00026			1.6926	0.08	1.3924	0.0909	0.6588	0.0705	0.5936	0.0728	-0.9817
	LEU-246	0.2394	0.0138	0.3114	0.0155	0.383	0.0174	0.2374	0.0214	-1.1901	0.0108	-0.00378			0.1182	0.0325	-0.064	0.0363	-0.085	0.0192	-0.0897	0.0202	0.1102	0.0228	-0.00206			-0.022	0.0076	0.0147	0.0089	0.0053	0.0071	0.0223	0.0097	0.0068	0.0046	0.00542			0.3377	0.0362	0.2599	0.0396	0.304	0.0237	0.1703	0.0276	-1.0749
	ALA-247	0.3282	0.0302	0.4462	0.0389	-0.3317	0.0208	-0.5211	0.0239	0.063	0.0233	-0.00308			0.2317	0.0322	0.1105	0.0362	0.1501	0.0323	0.0677	0.0282	-0.0632	0.0138	0.09936			-0.008	0.0069	-0.0067	0.0085	-0.0037	0.0101	0.0206	0.0099	-0.0039	0.0064	-0.00034			0.5532	0.0417	0.5495	0.0486	-0.1839	0.0365	-0.4316	0.0371	-0.0036
	ASP-248	56.1767	0.1756	60.3847	0.2089	56.6801	0.1526	55.263	0.2366	45.9163	0.2426	54.8842			0.2424	0.1203	-0.0668	0.14	-0.8146	0.135	-0.2376	0.1443	-0.1135	0.1183	-0.19802			-0.0072	0.0066	0.0048	0.0077	0.005	0.0061	0.0005	0.0062	0.0082	0.0064	0.00226			56.3976	0.1893	60.3128	0.2517	55.8661	0.1948	55.0253	0.2845	45.8057
	LYS-249	-0.7443	0.1963	2.9381	0.2554	-0.4353	0.2819	-3.2867	0.376	-6.4216	0.2685	-1.58996			1.0014	0.161	-0.0359	0.2032	1.486	0.1956	1.2915	0.2026	0.5559	0.1687	0.85978			-0.0066	0.0081	-0.0003	0.008	0.0131	0.0073	-0.0073	0.0083	0.0007	0.0156	-8e-05			0.257	0.2258	2.8998	0.2844	1.0524	0.3442	-2.03	0.4171	-5.8745
SicA	GLU-9	-39.1538	1.5842	-34.5067	1.3915	10.9033	0.4089	-39.0378	1.3142	-91.651	1.0989	-38.6892			40.2407	2.2543	32.4201	2.5029	-0.9098	0.2339	65.3424	2.2622	130.696	2.1979	53.5579			-0.9539	0.0362	-0.8966	0.04	-0.0649	0.0166	-1.3516	0.0419	-2.3803	0.0328	-1.12946			0.1316	1.0786	-3.0466	1.4459	9.9276	0.3956	24.9225	1.5769	36.7803
	GLU-10	-141.078	1.232	-174.71	1.8656	-56.3912	0.8451	-53.8851	0.5466	-118.798	2.2119	-108.973			92.218	1.58	136.184	2.6831	-5.4038	0.7568	-8.309	0.5317	36.807	2.442	50.2993			-1.3259	0.0202	-1.7707	0.0315	-0.1606	0.0175	-0.3438	0.0319	-0.5887	0.0374	-0.83794			-50.1523	0.8146	-40.4053	1.0065	-61.9864	0.5302	-62.5242	0.4162	-82.7152
	ARG-11	-20.2228	0.6109	-17.3889	0.6956	-2.9059	0.6711	-4.3735	0.7654	13.3047	1.043	-6.31728			88.1555	0.6156	91.8946	0.644	82.4127	0.6845	86.3638	0.9784	78.1337	1.0104	85.3921			-3.1942	0.0215	-3.0482	0.022	-3.1114	0.0219	-3.3513	0.0279	-2.4455	0.031	-3.03012			64.7593	0.513	71.4727	0.5226	76.3898	0.6391	78.6793	0.8351	88.9542
	VAL-12	-2.581	0.1021	-1.2366	0.1075	-4.4758	0.0945	-4.5042	0.1743	-1.7243	0.1243	-2.90438			2.2416	0.08	1.3286	0.0898	3.1536	0.0849	3.7969	0.1094	-1.3513	0.0901	1.83388			-0.014	0.0136	-0.0185	0.0141	-0.0905	0.0173	-0.0664	0.0207	-0.4969	0.0246	-0.13726			-0.3484	0.0544	0.0716	0.0535	-1.4114	0.0568	-0.7731	0.0995	-3.5773
	ALA-13	-0.099	0.0501	0.4402	0.0463	-0.7892	0.0464	-0.6797	0.0473	-2.2187	0.0994	-0.66928			1.1266	0.0533	0.7576	0.0536	1.494	0.0559	1.4754	0.0558	-0.3239	0.1117	0.90594			-0.0078	0.0093	-0.0011	0.0089	0.0217	0.013	0.0022	0.0097	-0.5836	0.0181	-0.11372			1.0201	0.0452	1.1987	0.0472	0.7279	0.0414	0.8017	0.0442	-3.1298
	GLU-14	-91.3988	0.7837	-95.0952	0.7446	-121.393	0.9273	-105.999	0.9374	-101.985	1.0954	-103.174			35.4691	0.9898	30.5517	0.6014	75.6978	1.0659	57.8323	1.2433	37.1012	1.1039	47.3304			-1.1121	0.0173	-1.1159	0.0203	-1.4007	0.0207	-1.337	0.021	-1.5585	0.0174	-1.30484			-57.0347	0.5988	-65.677	0.4442	-47.0765	0.7045	-49.5117	0.6653	-66.4092
	MET-15	-15.9005	0.2894	-15.6239	0.297	-12.718	0.1875	-15.8702	0.2534	-13.2892	0.3666	-14.6804			7.9207	0.3631	7.0071	0.3778	3.6624	0.2063	7.7844	0.3175	5.7287	0.4246	6.42066			-0.9112	0.0165	-0.951	0.0187	-0.9753	0.0159	-1.0712	0.0234	-1.0016	0.0223	-0.98206			-8.8983	0.1755	-9.561	0.2006	-10.0196	0.1346	-9.1406	0.2177	-8.5598
	ILE-16	-2.8504	0.0839	-3.3892	0.0922	-2.2694	0.0819	-2.0979	0.0679	-2.1621	0.0652	-2.5538			1.3422	0.073	1.8613	0.0717	1.6422	0.0764	1.4195	0.0713	1.9138	0.0647	1.6358			-0.07	0.0244	-0.0424	0.0243	-0.0572	0.0196	-0.0328	0.0198	-0.0069	0.0163	-0.04186			-1.5747	0.0729	-1.5637	0.0818	-0.6821	0.0687	-0.7129	0.0652	-0.2575
	TRP-17	-15.7344	0.1328	-15.6118	0.1242	-15.6469	0.1345	-15.0545	0.136	-15.0398	0.1304	-15.4175			3.8243	0.1269	4.1485	0.1464	4.4287	0.1764	3.6309	0.1368	5.277	0.1459	4.26188			-0.8778	0.0191	-0.8234	0.0177	-0.8832	0.0197	-0.8312	0.0198	-0.9073	0.0188	-0.86458			-12.7879	0.1387	-12.2945	0.1474	-12.0965	0.1513	-12.2476	0.1318	-10.6691
	ASP-18	-130.375	0.7294	-136.379	0.8181	-145.196	0.6753	-140.423	0.7754	-145.79	0.7696	-139.633			164.824	1.0445	159.519	1.021	161.055	0.9259	156.96	1.0097	163.828	1.0653	161.237			-1.919	0.0187	-1.909	0.0196	-2.0141	0.0201	-1.9223	0.0224	-2.0335	0.0199	-1.95958			32.532	0.6381	21.2674	0.6634	13.8211	0.6252	14.6539	0.7584	16.0108
	ALA-19	-4.1061	0.1294	-4.471	0.1286	-4.4157	0.1181	-4.4123	0.1326	-3.5502	0.1399	-4.19106			2.2689	0.1577	2.8085	0.1501	2.5382	0.1449	2.3361	0.1546	1.6968	0.1642	2.3297			-0.005	0.0119	-0.0217	0.011	0.0043	0.0106	-0.0337	0.0104	-0.0156	0.009	-0.01434			-1.8376	0.0458	-1.6805	0.0446	-1.88	0.0495	-2.1069	0.0473	-1.8707
	VAL-20	1.1654	0.0612	1.2936	0.0551	1.0471	0.0624	1.2989	0.0619	1.1398	0.0675	1.18896			-2.3268	0.0609	-2.2404	0.0523	-2.1059	0.0562	-2.4239	0.0547	-2.1984	0.0593	-2.25908			0.0103	0.0114	-0.0123	0.0105	-0.0083	0.0113	0.02	0.0117	0.0141	0.01	0.00476			-1.1479	0.0313	-0.9579	0.0326	-1.0656	0.0363	-1.1055	0.0359	-1.0469
	SER-21	-15.3141	0.266	-15.1374	0.2438	-15.9028	0.2348	-15.684	0.2499	-15.3324	0.2352	-15.4741			14.4437	0.27	13.9044	0.2422	14.5545	0.2416	14.1792	0.2799	14.1279	0.2608	14.2419			-0.2983	0.0109	-0.2712	0.0093	-0.2526	0.0092	-0.2856	0.0093	-0.2699	0.0106	-0.27552			-1.1659	0.1386	-1.5014	0.1182	-1.5892	0.1568	-1.7978	0.1337	-1.4607
	GLU-22	-45.4348	0.6376	-53.0132	0.6657	-57.9574	0.6419	-54.8946	0.7213	-55.5787	0.7834	-53.3757			20.7174	0.4884	19.789	0.5742	20.5686	0.4911	17.7466	0.5623	21.754	0.6239	20.1151			-0.2667	0.0114	-0.232	0.0143	-0.3119	0.0155	-0.2555	0.015	-0.2881	0.0144	-0.27084			-24.9624	0.4247	-33.4653	0.396	-37.7345	0.4627	-37.3966	0.419	-34.1353
	GLY-23	-7.8198	0.1572	-7.1907	0.1529	-8.0951	0.1407	-7.8999	0.1419	-7.4375	0.1432	-7.6886			6.0648	0.1759	5.2596	0.148	5.8781	0.1322	5.6744	0.1357	5.5947	0.1345	5.69432			-0.4526	0.012	-0.4244	0.0111	-0.4865	0.0115	-0.4903	0.0118	-0.389	0.0108	-0.44856			-2.2103	0.0905	-2.357	0.0925	-2.7064	0.0828	-2.7165	0.0836	-2.2256
	ALA-24	-14.4661	0.3207	-14.6174	0.2546	-13.3227	0.2083	-15.3721	0.2707	-14.7301	0.3063	-14.5017			14.0729	0.3186	13.8284	0.262	13.2096	0.2124	14.8299	0.25	13.2632	0.344	13.8408			-1.8417	0.0242	-1.9262	0.0222	-1.9292	0.0238	-1.9397	0.0247	-1.8867	0.0257	-1.9047			-2.2443	0.1663	-2.7169	0.1428	-2.0442	0.158	-2.4987	0.1931	-3.3537
	THR-25	-5.0142	0.1404	-6.0765	0.1741	-5.5324	0.1188	-6.019	0.1633	-5.5492	0.1246	-5.63826			0.4247	0.1304	1.6331	0.2436	0.4791	0.1148	1.104	0.2075	1.2945	0.1024	0.98708			-0.3129	0.0135	-0.3631	0.0155	-0.3703	0.014	-0.3342	0.0147	-0.2252	0.0134	-0.32114			-4.9143	0.0921	-4.8057	0.1366	-5.4214	0.0817	-5.2441	0.1293	-4.4855
	LEU-26	-7.2187	0.1624	-6.5739	0.1306	-7.0377	0.1097	-6.6358	0.1199	-5.8043	0.1004	-6.65408			0.3638	0.112	0.2723	0.0806	0.4238	0.0789	0.0476	0.0789	0.2585	0.0778	0.2732			-0.447	0.0185	-0.3343	0.0176	-0.3341	0.0174	-0.3056	0.018	-0.2715	0.0171	-0.3385			-7.3033	0.1035	-6.635	0.0873	-6.9439	0.0834	-6.8913	0.0918	-5.8151
	LYS-27	-6.5057	0.5114	-1.5579	0.4504	4.2767	0.5695	-0.0125	0.327	3.1864	0.3391	-0.1226			-1.6318	0.191	-1.8518	0.1817	-5.0193	0.31	-3.6951	0.1557	-2.8046	0.1425	-3.00052			-0.0178	0.0137	-0.0081	0.0159	0.0044	0.0147	-0.0112	0.0154	0.0149	0.019	-0.00356			-8.1544	0.4408	-3.4216	0.3975	-0.7397	0.3799	-3.7241	0.3035	0.4015
	ASP-28	-30.2822	0.5436	-34.5335	0.4551	-37.7904	0.5154	-32.4467	0.5999	-32.8974	0.467	-33.59			23.741	0.4537	19.9301	0.4222	22.0832	0.4141	17.8708	0.4687	17.9721	0.3733	20.3194			0.0016	0.0086	0.0044	0.0096	0.0001	0.0102	-0.0062	0.0102	0.0274	0.0105	0.00546			-6.5023	0.3232	-14.6061	0.3206	-15.7297	0.2815	-14.5701	0.3073	-14.9119
	VAL-29	0.0508	0.0196	0.1273	0.0202	0.1773	0.0179	0.2158	0.0159	0.2307	0.019	0.16038			-0.5965	0.0245	-0.4958	0.025	-0.6563	0.0235	-0.6922	0.0243	-0.612	0.0238	-0.61056			-0.0041	0.018	0.0118	0.017	-0.002	0.0157	-0.0195	0.0184	0.0302	0.0153	0.00328			-0.5494	0.0265	-0.357	0.0263	-0.4804	0.0278	-0.4948	0.0281	-0.3503
	HIS-30	1.3033	0.1555	1.5793	0.1858	0.917	0.1744	0.7281	0.1111	2.198	0.2102	1.34514			-2.2512	0.113	-2.1084	0.1158	-2.6383	0.1215	-2.4403	0.1205	-2.9791	0.142	-2.48346			0.0043	0.0103	0.0115	0.0094	0.0041	0.0095	0.011	0.0102	0.0195	0.0096	0.01008			-0.9504	0.0978	-0.5046	0.1202	-1.7044	0.1413	-1.7075	0.1181	-0.7518
	GLY-31	-2.0836	0.037	-2.093	0.0259	-2.1809	0.0289	-1.9649	0.0601	-1.7811	0.0574	-2.0207			0.5779	0.0411	0.456	0.0433	0.142	0.0455	0.0036	0.0463	0.3416	0.051	0.30422			-0.0065	0.0044	-0.0029	0.0046	-0.0031	0.0058	-0.0025	0.0073	-0.0023	0.0054	-0.00346			-1.5136	0.0456	-1.6401	0.0452	-2.0421	0.0419	-1.9642	0.0582	-1.4462
	ILE-32	-0.3309	0.0202	-0.0816	0.0159	0.0779	0.0185	0.194	0.0378	0.0151	0.0145	-0.0251			-0.1785	0.0292	-0.3004	0.0277	-0.5357	0.0312	-0.751	0.0297	-0.3845	0.0346	-0.43002			-0.0136	0.0185	0.0004	0.021	-0.007	0.0193	-0.0042	0.0192	0.0079	0.0199	-0.0033			-0.5235	0.0373	-0.3811	0.0364	-0.4664	0.0396	-0.5613	0.0442	-0.3621
	PRO-33	0.3866	0.016	0.1982	0.0132	0.3236	0.0159	0.355	0.0143	0.2179	0.0125	0.29626			-0.5756	0.0178	-0.3974	0.0152	-0.3753	0.0211	-0.2939	0.0163	-0.4586	0.0181	-0.42016			0.0053	0.0172	0.0107	0.015	0.0048	0.0175	0.0411	0.0168	0.0081	0.016	0.014			-0.1824	0.0267	-0.1876	0.0244	-0.0476	0.0253	0.102	0.0245	-0.2325
	GLN-34	1.1034	0.0785	1.0655	0.0841	0.8466	0.0889	0.7122	0.0709	0.4649	0.0544	0.83852			0.5125	0.0721	0.4317	0.0721	-0.5929	0.0856	-1.1172	0.0859	-0.0433	0.0877	-0.16184			-0.0038	0.0088	0.0001	0.0085	0.0098	0.0082	-0.0113	0.0078	-0.0032	0.0081	-0.00168			1.6106	0.1033	1.491	0.1099	0.2591	0.1141	-0.4182	0.1052	0.4251
	ASP-35	-33.5488	0.4244	-36.4213	0.4885	-27.9749	0.3888	-32.2632	0.321	-31.7689	0.3437	-32.3954			-2.2656	0.2415	-0.8324	0.273	-3.8669	0.2286	-6.4206	0.2163	-5.7907	0.2608	-3.83524			-0.4442	0.0166	-0.37	0.0176	-0.0965	0.0123	-0.0816	0.0115	-0.1786	0.0136	-0.23418			-36.2621	0.423	-37.6198	0.5314	-31.934	0.3497	-38.7588	0.3554	-37.7263
	MET-36	-8.2037	0.1714	-8.3429	0.1247	-6.124	0.1558	-3.565	0.1561	-5.6412	0.1355	-6.37536			3.9339	0.136	4.3143	0.1136	2.7382	0.1251	0.9272	0.1645	3.0924	0.134	3.0012			-0.9237	0.0286	-0.9346	0.0283	-0.757	0.031	-0.6385	0.0281	-0.6662	0.025	-0.784			-5.1898	0.1198	-4.9611	0.1323	-4.1427	0.141	-3.2747	0.1132	-3.2154
	MET-37	0.697	0.0484	0.5461	0.0503	0.379	0.0456	0.8577	0.0499	0.2914	0.0464	0.55424			-0.3205	0.0297	0.0773	0.027	-0.0314	0.0246	-0.1518	0.0265	-0.0219	0.0302	-0.08966			-0.0085	0.016	0.0041	0.0169	0.0199	0.0163	-0.0074	0.0158	-0.0324	0.0176	-0.00486			0.3683	0.0498	0.6257	0.0563	0.3688	0.0409	0.7005	0.0467	0.237
	ASP-38	-16.1392	0.2948	-17.8421	0.3476	-12.7649	0.2568	-15.1493	0.2507	-22.1055	0.2342	-16.8002			-1.9875	0.1882	-0.997	0.1847	-1.6686	0.1777	-4.7321	0.2027	-2.7782	0.1649	-2.43268			-0.0489	0.0091	-0.0159	0.0084	0.0121	0.0075	0.0068	0.0064	0.0011	0.0078	-0.00896			-18.1838	0.2957	-18.8765	0.3783	-14.4325	0.2961	-19.8846	0.2994	-24.8882
	GLY-39	-1.0428	0.097	-0.7259	0.076	-0.6989	0.0601	-2.395	0.0977	-2.7212	0.0957	-1.51676			0.4418	0.0861	0.4545	0.0625	0.6464	0.0476	1.4888	0.073	1.5987	0.0737	0.92604			-0.4577	0.0144	-0.38	0.0127	-0.297	0.0111	-0.5262	0.013	-0.4554	0.0121	-0.42326			-1.0598	0.0979	-0.649	0.0769	-0.3494	0.0598	-1.4343	0.0798	-1.5752
	LEU-40	-1.9207	0.0451	-1.9502	0.0448	-1.8571	0.0628	-2.0839	0.0615	-2.4224	0.0558	-2.04686			-0.5095	0.0459	-0.0851	0.0427	-0.0648	0.0394	-0.4036	0.035	-0.1005	0.0424	-0.2327			-0.2563	0.0122	-0.2539	0.0122	-0.2237	0.0181	-0.271	0.0146	-0.2346	0.014	-0.2479			-2.6851	0.0611	-2.2894	0.062	-2.1471	0.0722	-2.7614	0.0693	-2.7539
	TYR-41	1.1939	0.0389	1.069	0.0407	0.8227	0.0189	0.8392	0.0372	0.5057	0.0198	0.8861			0.399	0.0419	0.4229	0.0456	-0.0001	0.0398	-0.0238	0.0423	0.3826	0.0438	0.23612			0.0038	0.0135	-0.0123	0.0133	-0.0033	0.01	-0.0043	0.0121	0.0164	0.0123	6e-05			1.599	0.0559	1.4797	0.0557	0.8199	0.0392	0.8092	0.0495	0.9058
	ALA-42	1.0184	0.0425	1.3185	0.0298	1.2095	0.0361	0.2782	0.06	0.2392	0.0579	0.81276			0.7086	0.0319	0.5639	0.033	0.2721	0.0304	-0.2118	0.0461	0.3102	0.0377	0.3286			-0.0097	0.0065	0.0069	0.0066	0.0074	0.0071	-0.0508	0.0069	-0.0353	0.0062	-0.0163			1.7176	0.0432	1.8894	0.0328	1.4897	0.0313	0.0177	0.0592	0.513
	HIS-43	-9.6313	0.2134	-8.4127	0.1863	-5.498	0.3379	-8.263	0.2256	-10.8751	0.211	-8.53602			18.5627	0.1972	18.2277	0.1651	14.2232	0.4381	17.6926	0.2904	21.7103	0.2457	18.0833			-1.3206	0.0177	-1.2905	0.0146	-1.4565	0.0182	-1.5568	0.0193	-1.7111	0.0204	-1.4671			7.6103	0.1947	8.5161	0.1914	7.2668	0.2238	7.8965	0.2365	9.1317
	ALA-44	1.2054	0.0207	1.2347	0.0211	1.6617	0.0258	1.2487	0.0257	1.1315	0.0228	1.2964			0.3252	0.0284	0.1926	0.0245	-0.222	0.0328	0.0485	0.0297	0.2886	0.0297	0.12658			0.0255	0.0099	-0.0056	0.0112	-0.0035	0.0093	0.0421	0.0151	0.0272	0.0134	0.01714			1.5562	0.0274	1.4213	0.0284	1.4353	0.0321	1.3414	0.0319	1.448
	TYR-45	0.5667	0.0358	0.2247	0.0734	0.9105	0.0432	-17.374	0.4602	-18.7539	0.3404	-6.8852			1.656	0.0598	1.3444	0.0827	0.5061	0.0661	16.6642	0.3854	18.2871	0.2689	7.69156			-0.0064	0.0058	0.0021	0.0093	0.0094	0.0087	-0.7687	0.0165	-0.7747	0.0142	-0.30766			2.2168	0.0605	1.5701	0.0692	1.4265	0.0697	-1.5059	0.1759	-1.2308
	GLU-46	22.0877	0.428	19.0072	0.3731	27.7613	0.4675	33.3281	0.5658	9.6842	0.3354	22.3737			-12.9932	0.3162	-9.0181	0.2755	-15.3502	0.3376	-25.9924	0.4673	-11.3306	0.2359	-14.9369			-0.0131	0.0071	0.0093	0.0069	0.0061	0.0073	-0.0131	0.0075	-0.0121	0.0072	-0.00458			9.0671	0.2478	10.0157	0.2795	12.4111	0.3582	7.3274	0.3247	-1.6671
	PHE-47	0.5669	0.0366	-0.1624	0.0346	0.159	0.0431	0.6487	0.051	-0.4689	0.0393	0.14866			-1.4205	0.0376	-0.566	0.0392	-1.5376	0.0564	-1.9226	0.0594	-1.0331	0.0532	-1.29596			0.02	0.0128	-0.0269	0.0122	0.0134	0.016	0.0659	0.0156	0.0323	0.016	0.02094			-0.8327	0.0368	-0.757	0.0363	-1.3634	0.0547	-1.208	0.0504	-1.4678
	TYR-48	0.9682	0.068	0.6346	0.0543	3.1829	0.1011	2.5148	0.0822	1.4209	0.1213	1.74428			-0.6344	0.0534	-0.1058	0.0438	-1.7152	0.0889	-1.571	0.0748	-0.8411	0.1108	-0.9735			0.0048	0.0174	0.0566	0.0197	0.0062	0.0155	0.0556	0.0149	0.0257	0.0163	0.02978			0.3329	0.0702	0.5842	0.0629	1.4726	0.0808	0.9992	0.0673	0.6074
	ASN-49	-1.1788	0.1071	-0.2532	0.1102	-0.0128	0.1771	-0.1344	0.1099	-2.241	0.1615	-0.76404			1.8734	0.1265	1.6778	0.1249	1.3063	0.1815	0.9552	0.134	3.6998	0.1631	1.9025			-0.0083	0.0058	-0.0109	0.0074	-0.0206	0.0099	0.0043	0.0076	-0.0787	0.0106	-0.02284			0.6841	0.1054	1.415	0.1192	1.2773	0.1382	0.8284	0.1369	1.3782
	GLN-50	-19.7464	0.4784	-23.1569	0.5302	-18.8701	0.3728	-26.2008	0.4234	-35.7018	0.3515	-24.7352			15.2063	0.763	19.671	0.728	12.2738	0.3548	22.5752	0.4155	34.2238	0.434	20.79			-1.5857	0.0177	-1.662	0.0193	-1.8003	0.0186	-1.5404	0.0161	-1.901	0.0156	-1.69788			-6.1165	0.348	-5.1433	0.3203	-8.3995	0.2561	-5.1828	0.2515	-3.4021
	GLY-51	0.4025	0.0916	-2.4215	0.1287	-0.9205	0.1308	-1.2501	0.1077	-2.5042	0.1193	-1.33876			-2.8938	0.1144	-1.5794	0.1031	-1.4173	0.0965	-1.2222	0.0777	-0.3552	0.0921	-1.49358			-0.5872	0.0136	-0.4895	0.0151	-0.4886	0.0128	-0.4259	0.0125	-0.5558	0.0129	-0.5094			-3.0776	0.0828	-4.4854	0.095	-2.8243	0.104	-2.8988	0.0997	-3.4161
	ARG-52	-41.9372	0.6925	-33.4935	0.6861	-37.0567	0.6311	-42.4626	0.7561	-25.0495	0.5712	-35.9999			56.6993	0.5806	48.1263	0.634	50.4051	0.5647	60.1841	0.5697	51.878	0.5182	53.4586			-1.1812	0.0171	-1.1067	0.0141	-1.2874	0.0193	-1.1082	0.0155	-1.2108	0.0188	-1.17886			13.5832	0.3893	13.5078	0.4077	12.0408	0.4516	16.625	0.503	25.6013
	LEU-53	-14.3428	0.1499	-3.8083	0.1172	-7.6491	0.1802	-4.3217	0.096	-5.1946	0.0986	-7.0633			10.5747	0.159	1.21	0.0944	4.102	0.1328	1.7471	0.0702	2.2403	0.0836	3.97482			-0.4333	0.0237	-0.0984	0.0213	-0.3554	0.0287	-0.0563	0.0219	-0.0888	0.0204	-0.20644			-4.2	0.1015	-2.6949	0.0664	-3.906	0.1195	-2.6377	0.0733	-3.039
	ASP-54	-26.4004	0.9567	-37.8707	0.8111	-63.901	1.2905	-47.2323	0.9958	-56.7722	1.1346	-46.4353			27.567	0.9505	42.6967	0.7475	61.9036	1.5081	46.6378	0.8958	45.0963	1.0543	44.7803			-1.2448	0.0164	-1.0734	0.0155	-1.0782	0.0193	-1.1117	0.0159	-1.0792	0.0163	-1.11746			-0.0792	0.4982	3.7931	0.5642	-3.0813	0.6654	-1.7086	0.6371	-12.7339
	GLU-55	-60.8337	0.5473	-89.056	0.577	-73.6991	0.6421	-86.9315	0.5782	-94.4891	0.5321	-81.0019			83.4524	0.6218	103.635	0.5727	102.302	0.6757	95.9779	0.5894	98.1435	0.5021	96.702			-1.3445	0.015	-1.3067	0.0136	-1.3724	0.0237	-1.2283	0.0142	-1.3175	0.0158	-1.31388			21.2792	0.4501	13.2486	0.4621	27.2196	0.587	7.8263	0.5375	2.3726
	ALA-56	-2.8333	0.0525	-0.4464	0.0456	-1.1535	0.0587	-0.7494	0.0566	-0.4519	0.0452	-1.1269			1.8627	0.0341	-0.8275	0.0334	-0.153	0.0356	-0.2389	0.0343	-0.2557	0.0285	0.07752			0.0006	0.008	-0.0043	0.0091	0.0086	0.0117	0.0028	0.0101	-0.001	0.0119	0.00134			-0.9704	0.0336	-1.2775	0.0335	-1.2987	0.0389	-0.9859	0.0373	-0.7074
	GLU-57	40.0849	1.1127	5.7061	1.1961	8.1744	1.3585	12.0966	1.4916	-1.4854	1.0939	12.9153			-16.4143	1.3827	19.3121	1.4985	16.9297	1.7397	9.7795	1.8601	20.8481	1.4546	10.091			-0.0875	0.0224	-0.2311	0.0219	-0.2809	0.0213	-0.1749	0.0225	-0.411	0.0226	-0.23708			23.5774	0.5403	24.8146	0.6317	24.7848	0.7179	21.6806	0.6257	18.9561
	THR-58	-3.9693	0.1498	-2.2215	0.1005	-1.7601	0.1541	-1.6533	0.1096	-0.9924	0.0857	-2.11932			2.6618	0.0995	0.9189	0.1113	-0.0299	0.1362	0.121	0.0906	0.2757	0.0888	0.7895			-0.1363	0.0161	-0.1158	0.0176	-0.1212	0.0221	-0.1167	0.02	-0.1271	0.0175	-0.12342			-1.4473	0.1294	-1.4221	0.1153	-1.9235	0.1459	-1.6492	0.0967	-0.8436
	PHE-59	-2.1144	0.0331	-1.1765	0.0313	-1.6963	0.0352	-1.4153	0.0361	-1.0021	0.0317	-1.48092			0.8687	0.0236	-0.1701	0.0217	-0.0011	0.0231	0.0101	0.0202	-0.0034	0.0191	0.14084			0.0129	0.0117	-0.0121	0.0074	-0.0151	0.0156	0.0255	0.0114	0.0098	0.0096	0.0042			-1.2331	0.0269	-1.3567	0.0252	-1.7121	0.0324	-1.3797	0.0292	-0.9958
	PHE-60	-3.2656	0.0611	-2.2958	0.0629	-2.7714	0.0595	-2.5403	0.0657	-2.2991	0.0621	-2.63444			1.6316	0.05	0.6516	0.0434	0.9149	0.0461	0.8093	0.0458	0.8462	0.0461	0.97072			-0.0114	0.0157	0.0206	0.015	-0.0407	0.0186	-0.0371	0.0143	-0.015	0.0166	-0.01672			-1.6471	0.0377	-1.62	0.0416	-1.898	0.0375	-1.7648	0.0417	-1.4645
	ARG-61	-28.7066	1.0363	-14.2681	1.2967	-17.216	1.1011	-14.0888	0.7888	1.5293	1.7067	-14.55			29.908	1.1531	21.423	1.3348	24.9491	1.1932	20.4347	0.7148	13.3759	1.8756	22.0181			-1.4974	0.0215	-1.292	0.0249	-1.4215	0.0279	-1.3135	0.0245	-1.2426	0.0338	-1.3534			-0.3257	0.4541	5.8773	0.4534	6.2565	0.4492	5.0385	0.4287	13.6031
	PHE-62	-1.1665	0.037	-0.9425	0.0387	-0.6373	0.0377	-0.515	0.0331	-0.2821	0.0326	-0.70868			0.8848	0.0281	0.4756	0.0269	0.2581	0.029	0.2893	0.0235	0.2626	0.0254	0.43408			-0.0151	0.0179	0.005	0.0172	0.0058	0.0178	0.005	0.0166	-0.0118	0.0169	-0.00222			-0.2962	0.0383	-0.4615	0.0337	-0.3726	0.0308	-0.2198	0.0312	-0.0289
	LEU-63	-0.3639	0.0274	0.1272	0.027	0.0034	0.0265	0.2283	0.023	0.327	0.0211	0.0644			0.2648	0.0183	-0.1846	0.0157	-0.0671	0.0169	-0.1795	0.0141	-0.1878	0.0133	-0.07084			0.0212	0.0168	-0.0315	0.0164	0.0229	0.0136	0.023	0.0132	0.009	0.0126	0.00892			-0.0774	0.0263	-0.0872	0.0282	-0.0406	0.024	0.0729	0.0221	0.147
	CYS-64	-0.2575	0.0503	0.1612	0.0475	-0.1656	0.0415	2.3116	0.0583	0.3891	0.0432	0.48776			0.1989	0.0435	-0.1918	0.0368	-0.095	0.0301	-0.6791	0.0267	-0.4701	0.0286	-0.24742			0.0048	0.0095	0.0048	0.0096	-0.007	0.0088	-0.0092	0.0095	-0.008	0.0099	-0.00292			-0.0554	0.0344	-0.024	0.0327	-0.2684	0.0335	1.6224	0.0434	-0.088
	ILE-65	0.275	0.0247	0.5414	0.0235	0.4338	0.0227	0.5191	0.0207	0.6691	0.0202	0.48768			-0.077	0.0241	-0.2618	0.0235	-0.245	0.0259	-0.4509	0.0237	-0.4181	0.0203	-0.29056			-0.0071	0.0158	0.0283	0.019	0.0085	0.0162	0.0071	0.0162	0.0182	0.02	0.011			0.1912	0.0315	0.309	0.0325	0.1965	0.0302	0.0766	0.0318	0.2711
	TYR-66	0.2278	0.0315	0.2833	0.0339	0.0609	0.0369	0.0234	0.0335	0.2419	0.0297	0.16746			0.5865	0.05	0.2978	0.0498	-0.0228	0.0641	-0.3513	0.0456	0.142	0.0518	0.13044			0.0088	0.0137	0.0183	0.0118	0.0139	0.0153	-0.0131	0.0137	-0.0101	0.0136	0.00356			0.8247	0.0569	0.5987	0.0589	0.0484	0.0701	-0.341	0.0542	0.3723
	ASP-67	9.4357	0.2549	3.9823	0.2391	7.8251	0.1837	5.0396	0.1781	1.6335	0.1888	5.58324			-0.5539	0.1118	0.0736	0.1174	-0.4219	0.1149	-0.4941	0.111	0.5265	0.1209	-0.17396			-0.0089	0.0057	-0.0021	0.0066	0.003	0.0064	-0.003	0.0072	0.0099	0.0071	-0.00022			8.8663	0.2501	4.0585	0.2456	7.4051	0.2142	4.5446	0.214	2.1741
	PHE-68	0.2931	0.0275	-0.1385	0.028	0.7869	0.033	0.3966	0.0265	0.2498	0.0252	0.31758			-0.03	0.0251	0.2535	0.0315	-0.1557	0.0338	-0.2557	0.0283	0.0449	0.0324	-0.0286			0.0121	0.0135	0.0249	0.0147	-0.0063	0.0123	0.0051	0.0121	0.0204	0.0111	0.01124			0.2758	0.038	0.1408	0.0378	0.6248	0.0489	0.1458	0.0412	0.3137
	TYR-69	0.2426	0.0246	0.125	0.0224	0.4604	0.0328	0.4212	0.0288	0.3515	0.0235	0.32014			0.2813	0.053	0.4529	0.0544	-0.2444	0.0664	-0.5579	0.0576	-0.0245	0.0571	-0.01852			-0.0132	0.0128	0.0067	0.0085	-0.0128	0.0105	-0.0089	0.0084	0.0233	0.0086	-0.00098			0.5108	0.0564	0.5843	0.063	0.2059	0.0718	-0.1425	0.0647	0.3474
	ASN-70	1.7012	0.0194	1.6683	0.0183	1.6924	0.0227	1.6346	0.0248	1.3254	0.0211	1.60438			-0.3586	0.052	0.0013	0.0482	-0.3535	0.0645	-0.4452	0.0511	-0.1285	0.0576	-0.2569			-0.0066	0.0085	-0.0006	0.0062	0.0104	0.0091	-0.0069	0.0084	0.0039	0.0052	4e-05			1.3368	0.0508	1.6662	0.0492	1.3479	0.0683	1.1816	0.0569	1.2037
	PRO-71	0.7678	0.0108	0.7722	0.0077	0.8712	0.0089	0.8496	0.0072	0.7357	0.0084	0.7993			-0.197	0.0166	-0.1087	0.0135	-0.1572	0.0142	-0.176	0.0131	-0.0949	0.0114	-0.14676			-0.0167	0.0072	0.0046	0.0093	-0.0324	0.0089	-0.0023	0.0088	-0.0016	0.0071	-0.00968			0.554	0.02	0.6692	0.0155	0.6822	0.0173	0.6719	0.0166	0.6393
	ASP-72	3.5348	0.1933	-0.1436	0.2132	3.0275	0.1854	1.6544	0.1943	-4.3549	0.1709	0.74364			-2.4772	0.1135	-0.6899	0.1217	-1.1956	0.1157	-1.7607	0.1273	-0.899	0.11	-1.40448			-0.0037	0.0124	0.0009	0.0099	0.0117	0.0095	0.0064	0.0089	0.0012	0.0107	0.0033			1.0551	0.1799	-0.8328	0.2199	1.8495	0.1769	-0.0987	0.2129	-5.2516
	TYR-73	1.642	0.0752	1.6825	0.0743	2.7791	0.0686	1.5768	0.0678	1.7668	0.0634	1.88944			-0.5949	0.049	-0.2879	0.0461	-0.8837	0.0459	-0.528	0.0401	-0.4103	0.0443	-0.54096			0.0244	0.0126	0.004	0.0116	-0.0127	0.013	0.0004	0.0132	-0.0312	0.0149	-0.00302			1.0718	0.0604	1.399	0.0624	1.8846	0.0692	1.0492	0.0682	1.3274
	THR-74	1.4997	0.019	1.4074	0.0188	1.5506	0.0211	1.5014	0.0235	1.3548	0.0236	1.46278			-0.6447	0.038	-0.3269	0.0382	-0.7856	0.0428	-0.8706	0.037	-0.3652	0.0503	-0.5986			0.0014	0.0114	-0.011	0.0115	-0.0038	0.0093	0.0034	0.0084	0.0067	0.0095	-0.00066			0.8547	0.0389	1.0695	0.0418	0.7618	0.046	0.6354	0.0427	0.9959
	MET-75	1.4763	0.053	1.9193	0.0415	1.6955	0.0628	2.0128	0.0539	1.724	0.0542	1.76558			-0.6665	0.0353	-0.5743	0.022	-0.8441	0.0311	-0.956	0.0246	-0.7739	0.0287	-0.76296			-0.0077	0.0145	-0.0156	0.015	-0.0084	0.0127	0.0173	0.0125	0.0125	0.0116	-0.00038			0.8047	0.042	1.3324	0.0394	0.8431	0.0544	1.0717	0.0508	0.9612
	GLY-76	2.0029	0.0214	1.6649	0.0226	2.0241	0.0231	2.0592	0.0224	1.7918	0.0221	1.90858			-1.1409	0.015	-0.4687	0.014	-1.0326	0.0174	-0.9422	0.0168	-0.9346	0.0161	-0.9038			-0.0027	0.0067	0.0114	0.0074	-0.0069	0.0055	-0.0079	0.0055	-0.0067	0.0054	-0.00256			0.86	0.0158	1.2077	0.0185	0.9837	0.0176	1.1091	0.018	0.8509
	LEU-77	2.6631	0.0203	2.6319	0.0237	3.037	0.0255	2.9954	0.0245	2.849	0.0233	2.83528			-1.5178	0.0186	-1.1269	0.0168	-1.8391	0.0242	-1.5348	0.0242	-1.5053	0.0264	-1.50478			0.0158	0.0203	-0.009	0.019	0.0149	0.0155	-0.0093	0.0135	-0.0148	0.0161	-0.00048			1.1617	0.0246	1.4975	0.0256	1.213	0.0267	1.4523	0.0287	1.3277
	ALA-78	2.2405	0.0282	2.5352	0.0217	2.9379	0.0276	2.8397	0.0273	2.8058	0.02	2.67182			-1.032	0.0193	-0.9658	0.0132	-1.614	0.022	-1.5188	0.0202	-1.6041	0.0175	-1.34694			-0.007	0.0136	0.001	0.0125	-0.023	0.0108	-0.0163	0.0088	-0.0188	0.0126	-0.01282			1.2018	0.0203	1.5713	0.0181	1.3012	0.022	1.3044	0.0194	1.1824
	ALA-79	2.0482	0.0247	2.428	0.0247	2.6453	0.0306	2.6646	0.0268	2.4819	0.0285	2.4536			-0.9894	0.0173	-0.8029	0.0166	-1.4238	0.0205	-1.4603	0.0179	-1.6147	0.0181	-1.25822			-0.0077	0.0105	-0.0155	0.0092	-0.0087	0.0114	0.0156	0.013	0.0313	0.0146	0.003			1.0509	0.0193	1.6094	0.0191	1.211	0.0253	1.219	0.0248	0.8971
	VAL-80	2.376	0.0402	2.5151	0.0372	2.4238	0.0406	2.5036	0.0428	2.2823	0.0495	2.42016			-1.7518	0.0268	-1.2564	0.0263	-1.9996	0.0329	-2.108	0.0306	-2.2501	0.0316	-1.87318			0.0685	0.0174	0.0079	0.0133	0.0228	0.0132	0.0115	0.012	0.0423	0.0154	0.0306			0.6918	0.0285	1.2662	0.0275	0.4463	0.0309	0.4057	0.0343	0.0773
	CYS-81	1.8611	0.0958	3.6967	0.1067	4.6054	0.0762	3.7192	0.1027	4.4641	0.0719	3.6693			-0.8079	0.0665	-2.0689	0.0702	-3.0936	0.0582	-2.698	0.0582	-2.9995	0.0556	-2.33358			-0.041	0.0157	-0.0341	0.0154	0.0029	0.0179	0.036	0.0165	0.0065	0.0164	-0.00594			1.011	0.0391	1.5903	0.0424	1.515	0.0397	1.0582	0.0656	1.4698
	GLN-82	2.3213	0.1052	1.9898	0.0992	2.3124	0.0829	2.1082	0.0945	1.812	0.0601	2.10874			-0.2397	0.0704	-0.2985	0.0809	-1.1611	0.0771	-1.5244	0.0709	-1.3318	0.0699	-0.9111			-0.0022	0.0129	-0.0035	0.0118	-0.0219	0.0159	0.0142	0.0158	-0.0138	0.0135	-0.00544			2.075	0.1128	1.6865	0.089	1.1289	0.0776	0.5999	0.0733	0.4639
	LEU-83	0.6214	0.0415	2.5839	0.0395	3.5698	0.0487	2.8148	0.0477	2.8638	0.0469	2.49074			0.3539	0.055	0.0444	0.0346	-1.7386	0.0627	-1.1634	0.0493	-2.3148	0.0499	-0.9637			0.004	0.0263	0.0713	0.0237	-0.0016	0.017	0.0215	0.0182	0.0158	0.0184	0.0222			0.9815	0.0401	2.7001	0.0358	1.8315	0.0497	1.6747	0.0435	0.5641
	LYS-84	-83.3182	0.6665	-57.3141	0.7024	-70.7533	0.7833	-77.0403	0.8532	-64.0852	0.8398	-70.5022			47.4931	0.5377	21.5568	0.6757	38.5542	1.1784	49.6354	1.3616	47.8095	1.3351	41.0098			-0.0383	0.0261	-0.0497	0.0192	-0.1535	0.0218	-0.1957	0.0209	-0.2833	0.0232	-0.1441			-35.8705	0.4727	-35.7762	0.4124	-32.3848	0.6379	-27.5929	0.7661	-16.511
	LYS-85	-53.6339	0.5777	-52.6639	0.7524	-64.5616	0.6412	-58.8687	0.6124	-63.7831	0.7074	-58.7022			8.3312	0.3173	7.9875	0.2475	22.5808	0.6038	18.8379	0.4795	42.1994	1.0928	19.9874			0.0103	0.0134	0.0115	0.0132	-0.0103	0.0133	-0.0015	0.0133	-0.1676	0.0201	-0.03152			-45.3015	0.5458	-44.6908	0.6807	-42.0171	0.4227	-40.0353	0.412	-21.7733
	GLN-86	-31.6546	0.272	-24.0122	0.5176	-25.109	0.4317	-26.4908	0.3856	-28.0534	0.3219	-27.064			31.293	0.3152	21.5331	0.6948	25.0675	0.5481	24.9525	0.5056	21.4428	0.39	24.8578			-1.2053	0.0279	-0.5085	0.0145	-0.9265	0.0274	-0.7815	0.0244	-0.6182	0.0221	-0.808			-1.5775	0.2567	-2.9586	0.2561	-0.9608	0.264	-2.3157	0.2373	-7.2286
	PHE-87	-14.7459	0.2977	-12.9	0.2688	-14.0704	0.2359	-12.602	0.2063	-14.0593	0.1541	-13.6755			8.8525	0.2804	6.4426	0.2113	10.112	0.2073	9.6167	0.2086	10.147	0.1436	9.03416			-0.2131	0.0167	-0.431	0.0199	-0.1785	0.016	-0.1542	0.0165	-0.1567	0.0164	-0.2267			-6.1074	0.1019	-6.8909	0.1308	-4.128	0.1563	-3.1407	0.1127	-4.0583
	GLN-88	-65.3554	0.8084	-62.166	0.6717	-74.0776	0.4139	-67.3868	0.4532	-65.6893	0.3153	-66.935			67.6272	0.719	62.9999	0.7167	71.41	0.384	66.9284	0.4407	65.1084	0.2799	66.8148			-3.2836	0.0268	-3.3582	0.0267	-2.6479	0.0267	-2.8094	0.0239	-2.8703	0.0194	-2.99388			-1.0709	0.3308	-2.5421	0.3644	-5.3318	0.4166	-3.2766	0.3444	-3.4369
	LYS-89	-131.696	0.9102	-128.036	0.9459	-148.749	1.0326	-146.49	1.3972	-128.608	0.8597	-136.716			125.183	1.4232	71.2518	1.4317	106.852	1.294	110.842	2.1392	101.127	1.1174	103.051			-1.6589	0.0366	-1.0999	0.031	-1.4719	0.0273	-1.4922	0.0264	-1.4971	0.0234	-1.444			-8.1627	0.9391	-57.8985	1.2299	-43.281	0.9226	-37.1378	1.1415	-28.9813
	ALA-90	-7.2719	0.072	-5.9238	0.0838	-10.4698	0.1798	-10.9412	0.1346	-10.9198	0.1414	-9.1053			3.9765	0.049	2.6022	0.0788	8.7487	0.1417	9.2761	0.1035	8.7563	0.1118	6.67196			0.0211	0.0141	-0.0127	0.0161	-0.2629	0.0212	-0.3342	0.0174	-0.4284	0.0166	-0.20342			-3.274	0.054	-3.3319	0.0456	-1.9847	0.1357	-2.0024	0.1279	-2.5941
	CYS-91	-11.6774	0.5027	-21.7013	0.2479	-24.8639	0.5795	-29.152	0.3166	-27.3397	0.4046	-22.9469			6.5821	0.3855	14.6651	0.151	22.2442	0.4954	24.7504	0.306	23.8996	0.3589	18.4283			-0.6855	0.0271	-1.4108	0.0191	-1.5989	0.0244	-1.6263	0.0181	-1.6238	0.0194	-1.38906			-5.7752	0.1794	-8.4534	0.1896	-4.2352	0.2356	-6.0345	0.1738	-5.051
	ASP-92	61.8861	0.4924	57.5593	0.4986	56.5553	0.3687	55.0932	0.3508	49.0043	0.3225	56.0196			-27.889	0.5701	-31.6624	0.4376	-17.3558	0.2831	-16.588	0.2328	-16.0786	0.2537	-21.9148			-0.0112	0.0151	-0.0779	0.0191	-0.0109	0.0129	0.021	0.0123	-0.0011	0.0137	-0.01602			33.9689	0.4011	25.8024	0.2879	39.202	0.2777	38.5201	0.3036	32.9112
	LEU-93	-3.6791	0.0447	-4.1375	0.0272	-4.3987	0.0597	-4.6225	0.0574	-4.9898	0.0746	-4.36552			1.9825	0.0389	2.3455	0.0245	2.771	0.0952	2.8217	0.0805	2.9181	0.0798	2.56776			0.0178	0.0174	-0.0073	0.0181	-0.0177	0.0161	0.0063	0.0162	-0.0065	0.0129	-0.00148			-1.6792	0.0256	-1.7996	0.0261	-1.6433	0.069	-1.7963	0.0568	-2.0783
	TYR-94	-3.8086	0.1395	-5.1715	0.0922	-2.3993	0.1459	-3.0194	0.1465	-5.2256	0.2898	-3.92488			2.107	0.0954	3.0881	0.0696	1.3341	0.1682	1.4476	0.1499	3.1139	0.2095	2.21814			0.0334	0.0159	0.0128	0.0173	-0.0446	0.0147	-0.1007	0.0172	-0.2538	0.0192	-0.07058			-1.669	0.0675	-2.0705	0.0543	-1.1115	0.0741	-1.6779	0.0784	-2.3667
	ALA-95	-2.8475	0.0227	-2.9035	0.0177	-1.9487	0.0237	-2.053	0.0309	-2.2024	0.0271	-2.39102			1.5341	0.0285	1.697	0.0154	1.0676	0.0239	1.0814	0.025	1.087	0.0267	1.29342			0.0021	0.0114	0.0096	0.0106	0.007	0.0066	-0.0058	0.0066	0.0082	0.007	0.00422			-1.3112	0.0195	-1.1962	0.0159	-0.8749	0.0213	-0.9749	0.0239	-1.1065
	VAL-96	-2.4453	0.0203	-2.5744	0.016	-2.1471	0.028	-2.3531	0.032	-2.514	0.0278	-2.40678			1.2512	0.0235	1.4089	0.0126	1.2119	0.0278	1.2869	0.0278	1.2465	0.0319	1.28108			-0.0366	0.0154	-0.0003	0.0153	-0.0291	0.0177	-0.0314	0.0161	-0.0125	0.0136	-0.02198			-1.231	0.0193	-1.166	0.0182	-0.9654	0.0308	-1.0964	0.0279	-1.2791
	ALA-97	-1.8565	0.0134	-1.9001	0.0108	-2.0425	0.0219	-2.1681	0.0259	-2.3715	0.0243	-2.06774			0.871	0.0157	0.9916	0.0088	1.1744	0.0169	1.1961	0.0176	1.2023	0.0176	1.08708			0.0303	0.0107	0.0043	0.0088	-0.0071	0.0116	-0.0087	0.0124	-0.0251	0.0116	-0.00126			-0.9558	0.0129	-0.9041	0.0115	-0.8742	0.0172	-0.9797	0.0184	-1.1951
	PHE-98	-1.3563	0.0106	-1.2955	0.0096	-1.8213	0.0169	-1.7832	0.0171	-1.7733	0.0165	-1.60592			0.6075	0.0156	0.6374	0.0127	0.8627	0.02	0.7559	0.0179	0.8135	0.0189	0.7354			-0.0058	0.0095	0.0065	0.0092	-0.0131	0.0105	0.008	0.0123	0.0029	0.0123	-0.0003			-0.7542	0.0182	-0.6518	0.0163	-0.9718	0.0204	-1.0206	0.02	-0.9575
	THR-99	-1.0154	0.0252	-1.2112	0.0303	-0.8699	0.0423	-0.8666	0.0446	-1.132	0.0453	-1.01902			0.5344	0.0298	0.7318	0.0305	0.2476	0.0481	0.074	0.0476	0.3511	0.0498	0.38778			-0.0087	0.0119	0.012	0.0131	0.0277	0.0132	-0.0119	0.0115	0.0171	0.0105	0.00724			-0.4899	0.0382	-0.4685	0.0357	-0.591	0.0459	-0.8032	0.0409	-0.7635
	LEU-100	-1.2539	0.0104	-1.1661	0.0106	-1.3819	0.0197	-1.376	0.0244	-1.6545	0.0198	-1.36648			0.7425	0.0205	0.7473	0.019	0.8359	0.0257	0.7173	0.0249	0.8941	0.0253	0.78742			-0.0015	0.0176	-0.0248	0.0176	0.0086	0.0167	-0.0279	0.0154	-0.0076	0.0148	-0.01064			-0.5126	0.0274	-0.4442	0.0251	-0.5369	0.0306	-0.6868	0.0266	-0.7673
	LEU-101	-0.185	0.028	0.125	0.0184	-0.4648	0.0537	-0.4071	0.0514	-0.8058	0.0533	-0.34754			0.2636	0.0151	0.1619	0.013	0.2583	0.0313	0.1958	0.0309	0.2205	0.0325	0.22002			-0.0232	0.0162	0.0084	0.0134	-0.0275	0.0189	0.0235	0.0176	0.0079	0.0173	-0.00218			0.0558	0.0222	0.2972	0.0188	-0.2344	0.0367	-0.1876	0.0342	-0.5775
	LYS-102	-13.6166	0.1194	-11.9271	0.1661	-27.3576	0.1897	-25.6971	0.1765	-18.5892	0.2102	-19.4375			2.4069	0.122	2.1561	0.1238	3.1992	0.153	2.5688	0.1326	3.573	0.1307	2.7808			-0.022	0.0159	0.0252	0.0163	-0.0034	0.0163	-0.008	0.0172	0.0108	0.0181	0.00052			-11.225	0.159	-9.7439	0.2027	-24.1579	0.2275	-23.1202	0.205	-14.9961
	ASN-103	0.2775	0.02	0.3681	0.0195	0.3452	0.0414	0.0858	0.0426	-0.0336	0.0526	0.2086			0.3826	0.0609	0.4591	0.0582	0.0743	0.0607	0.1122	0.0638	0.4198	0.0637	0.2896			0.0098	0.0111	0.0139	0.0102	0.0016	0.0145	0.0095	0.013	-0.0147	0.01	0.00402			0.6717	0.063	0.8441	0.0617	0.4187	0.064	0.2091	0.0639	0.373
	ASP-104	24.7512	0.2215	26.9276	0.3133	55.9944	0.4912	51.2189	0.4278	48.4327	0.5131	41.465			-3.6727	0.1603	-4.2914	0.1284	-17.1417	0.326	-15.0731	0.2349	-23.0179	0.3727	-12.6394			0.0064	0.0119	0.0111	0.0127	0.0137	0.0076	0.0064	0.0082	0.0141	0.0061	0.01034			21.0918	0.1863	22.6467	0.3082	38.8938	0.3846	36.1532	0.3901	25.434
	TYR-105	0.2297	0.0237	-0.2305	0.0393	-1.4827	0.0916	-1.2448	0.0828	-8.9877	0.3861	-2.3432			0.0986	0.0482	0.0604	0.0447	0.0721	0.07	-0.4145	0.064	6.1816	0.3281	1.19964			-0.0081	0.0116	-0.0043	0.0114	0.0056	0.014	-0.012	0.0146	-0.8092	0.0394	-0.1656			0.3191	0.0527	-0.1766	0.0606	-1.4075	0.0901	-1.6732	0.0896	-3.6073
	ARG-106	-39.2731	0.7019	-47.6935	0.5908	-121.191	1.2168	-106.508	1.1114	-115.011	0.8218	-85.9352			8.5201	0.5084	8.3526	0.2903	74.6391	1.9844	57.6926	1.3956	94.6655	1.2309	48.774			0.0042	0.0138	-0.0154	0.013	-0.8684	0.0387	-0.7507	0.0284	-1.2504	0.0275	-0.57614			-30.7342	0.3022	-39.3466	0.3825	-47.4769	0.8738	-49.6329	0.6724	-21.5985
	PRO-107	0.6979	0.0127	0.5743	0.0171	0.8599	0.0323	0.7455	0.0318	0.153	0.0279	0.60612			-0.3647	0.009	-0.4136	0.0123	-0.5032	0.0224	-0.386	0.0211	0.0698	0.0222	-0.31954			0.0177	0.0159	-0.0064	0.0157	-0.0007	0.0146	0.0242	0.0128	-0.0048	0.0135	0.006			0.3508	0.0191	0.1549	0.021	0.356	0.0232	0.3839	0.0252	0.2169
	VAL-108	0.3316	0.0151	0.1541	0.019	0.0653	0.0389	0.0617	0.0392	-0.8461	0.039	-0.04668			-0.1523	0.0082	-0.2056	0.0105	0.0065	0.0226	-0.0018	0.0221	0.767	0.0273	0.08276			0.0047	0.0103	-0.0162	0.011	0.0031	0.0137	0.0184	0.0129	-0.01	0.0131	0			0.1837	0.0151	-0.0676	0.0155	0.0758	0.0271	0.0809	0.0276	-0.088
	PHE-109	-0.0307	0.0232	-0.1785	0.0278	-1.8835	0.1053	-1.7641	0.0658	-7.3997	0.1305	-2.2513			0.1587	0.0167	0.2062	0.0174	0.6801	0.0473	0.475	0.0382	4.7879	0.1126	1.26158			-0.0052	0.0125	0.0128	0.0149	-0.0879	0.022	-0.0914	0.0223	-0.6259	0.0247	-0.15952			0.1206	0.0268	0.043	0.0291	-1.2889	0.0938	-1.3822	0.0664	-3.2452
	PHE-110	1.1402	0.0352	0.4971	0.0349	-0.7471	0.1405	-1.5648	0.1854	-8.416	0.1847	-1.81812			-0.9744	0.0264	-0.9127	0.0302	-0.5053	0.1073	-0.3616	0.1102	1.0158	0.1143	-0.34764			0.0024	0.0103	-0.0132	0.0096	-0.2001	0.0195	-0.2754	0.0207	-1.3007	0.0306	-0.3574			0.1691	0.0338	-0.4284	0.0249	-1.4545	0.0942	-2.2093	0.1206	-8.7006
	THR-111	1.0972	0.0275	0.8608	0.031	1.2494	0.0581	0.9529	0.048	0.6056	0.0516	0.95318			-0.4844	0.0163	-0.6432	0.0182	-0.1755	0.0383	0.0533	0.0319	-0.0424	0.0354	-0.25844			0.0159	0.0137	0.0063	0.0129	-0.002	0.0117	-0.0206	0.0102	-0.0138	0.0094	-0.00284			0.6281	0.0224	0.2229	0.0228	1.0717	0.0306	0.9871	0.0264	0.551
	GLY-112	0.5061	0.0211	0.3251	0.0212	0.5287	0.0432	0.5346	0.0391	0.4989	0.0373	0.47868			-0.165	0.017	-0.3785	0.0149	0.3287	0.0279	0.337	0.0286	-0.0647	0.0342	0.0115			-0.0034	0.0052	-0.0054	0.0065	-0.0051	0.0067	-0.0038	0.0076	-0.0242	0.0129	-0.00838			0.3378	0.0173	-0.0586	0.0171	0.8506	0.0277	0.8676	0.021	0.409
	GLN-113	-2.2568	0.2458	-2.1842	0.2369	-24.4676	0.5333	-23.1423	0.346	-25.9133	0.2064	-15.5928			1.7841	0.1574	0.951	0.1803	25.1001	0.6899	21.8787	0.4082	29.1758	0.1901	15.7779			0.0014	0.0139	0.0158	0.0129	-0.9739	0.028	-1.0912	0.025	-1.225	0.018	-0.65458			-0.4645	0.1502	-1.2103	0.1361	-0.3929	0.2552	-2.3582	0.222	2.0314
	CYS-114	2.2963	0.0617	2.1035	0.056	-2.0878	0.243	-1.6653	0.1322	-2.9485	0.0956	-0.46036			-1.7787	0.0592	-2.2312	0.0488	1.7513	0.1005	1.9928	0.0908	2.9386	0.0663	0.53456			0.0161	0.0092	0.0076	0.0092	-0.038	0.0098	-0.0143	0.0106	0.005	0.0078	-0.00472			0.5324	0.0346	-0.1213	0.0329	-0.383	0.1972	0.3121	0.0793	-0.002
	GLN-115	0.81	0.0488	-0.2457	0.0529	-0.9263	0.0698	-0.5538	0.0522	-0.2665	0.0522	-0.23646			-0.3824	0.0412	-0.3108	0.0415	1.9697	0.061	1.4165	0.0479	0.5547	0.0566	0.64954			0.0281	0.0173	-0.0044	0.0195	-0.001	0.0138	-0.0038	0.0147	-0.0176	0.0148	0.00026			0.4536	0.0478	-0.5622	0.0498	1.0379	0.0498	0.858	0.0565	0.2681
	LEU-116	-0.7116	0.0462	-0.3072	0.0404	-8.3125	0.158	-8.7316	0.12	-9.5717	0.1097	-5.52692			0.3573	0.0551	-0.5827	0.0533	2.189	0.0931	1.6817	0.0638	1.3136	0.0559	0.99178			-0.028	0.0178	0.0054	0.0157	-0.9988	0.0253	-1.1338	0.0217	-1.1593	0.0197	-0.6629			-0.3814	0.0428	-0.8876	0.0532	-7.122	0.1715	-8.1809	0.1206	-9.4233
	LEU-117	-10.7117	0.1145	-9.7695	0.1208	-24.0284	0.181	-23.4563	0.1849	-21.9013	0.1712	-17.9734			5.4869	0.1281	3.3509	0.124	11.5188	0.14	11.1902	0.1315	10.5121	0.1592	8.41178			-1.2384	0.0237	-1.2889	0.0237	-2.0568	0.022	-2.0985	0.0242	-1.724	0.0185	-1.68132			-6.4666	0.1531	-7.7081	0.1507	-14.5703	0.1772	-14.372	0.1808	-13.112
	MET-118	-9.8119	0.1671	-11.6164	0.1269	-18.9846	0.3253	-17.7212	0.2564	-16.3453	0.233	-14.8959			4.749	0.1197	4.6291	0.1294	14.2555	0.3494	13.4124	0.2555	11.3417	0.1996	9.67754			-0.6918	0.0277	-0.739	0.0223	-0.9223	0.0283	-0.9327	0.0226	-0.7267	0.0225	-0.8025			-5.7532	0.1299	-7.7223	0.1242	-5.67	0.1572	-5.2409	0.1509	-5.7272
	ARG-119	-55.9628	1.0192	-56.8615	1.1231	-81.8146	0.7439	-75.7761	0.7881	-68.2478	0.6581	-67.7326			16.1421	1.1057	28.3137	1.3135	16.1209	0.8939	13.9519	0.7093	19.8757	0.6274	18.8809			-0.5294	0.0445	-0.5464	0.0412	-0.9341	0.0368	-0.7923	0.0302	-0.612	0.0275	-0.68284			-40.3501	0.426	-29.1594	0.5842	-66.6125	0.8331	-62.6023	0.7882	-49.0274
	LYS-120	-54.1638	1.0284	-37.2551	0.8235	-108.895	1.1916	-105.674	1.1791	-83.881	0.9762	-77.9737			19.6548	1.4722	9.7152	0.8446	34.2215	1.765	32.5692	1.7018	16.418	1.1122	22.5157			-0.4446	0.0354	-0.2084	0.0252	-0.8324	0.0333	-0.7405	0.027	-0.374	0.0295	-0.51998			-34.965	0.7931	-27.7684	0.562	-75.5364	0.8903	-73.8099	1.0128	-67.8442
	ALA-121	-0.5466	0.0234	-0.0243	0.0221	-1.8293	0.0356	-1.7333	0.0289	-1.2562	0.0297	-1.07794			-0.0531	0.0268	-0.1141	0.0331	-0.4856	0.0362	-0.4749	0.0335	-0.4187	0.0306	-0.30928			-0.0064	0.0076	-0.0044	0.0082	-0.0091	0.0073	-0.0175	0.0062	0.0019	0.0044	-0.0071			-0.6057	0.0308	-0.1425	0.0356	-2.3229	0.0424	-2.2264	0.0414	-1.6707
	ALA-122	-1.0044	0.0216	-0.5684	0.02	-2.0344	0.0297	-1.9837	0.0257	-1.6137	0.0247	-1.44092			0.1272	0.0219	0.0534	0.0231	-0.2912	0.0338	-0.3698	0.0293	-0.2609	0.031	-0.14826			-0.0129	0.0082	-0.0178	0.0092	0.008	0.0087	-0.0051	0.0074	-0.006	0.0071	-0.00676			-0.8911	0.029	-0.5339	0.0287	-2.3163	0.033	-2.358	0.0318	-1.8788
	LYS-123	-63.3881	0.5761	-55.6867	0.5806	-89.0345	0.7325	-86.8084	0.6564	-80.8156	0.7592	-75.1467			28.4866	0.9333	31.7978	1.0151	49.3302	1.1534	49.6964	1.0214	49.9296	1.4773	41.8481			-0.2178	0.0239	-0.1867	0.0223	-0.5376	0.0292	-0.6106	0.0219	-0.5216	0.0284	-0.41486			-35.1103	0.6484	-24.1086	0.6901	-40.2109	0.6414	-37.6932	0.6271	-31.357
	ALA-124	-0.7754	0.019	-0.4145	0.0214	-1.1034	0.0289	-1.1286	0.021	-1.0785	0.0248	-0.90008			0.1049	0.013	0.0985	0.0142	-0.6717	0.0262	-0.6223	0.0165	-0.4467	0.0228	-0.30746			0.0133	0.0168	-0.0103	0.0185	-0.0012	0.0132	-0.0321	0.0123	0.0018	0.0108	-0.0057			-0.6561	0.0219	-0.3258	0.0238	-1.7767	0.0254	-1.7833	0.0219	-1.5247
	ARG-125	-19.0628	0.1603	-14.8691	0.193	-45.0155	0.3103	-41.1249	0.2511	-31.4864	0.2636	-30.3117			1.5457	0.0736	1.804	0.0661	1.9104	0.1005	1.4502	0.0844	1.7996	0.075	1.70198			-0.0283	0.0131	-0.0235	0.0124	0.0019	0.016	-0.0392	0.013	0.0146	0.0112	-0.0149			-17.5383	0.1643	-13.0891	0.1982	-43.1088	0.3038	-39.7094	0.2541	-29.6665
	GLN-126	0.7343	0.0611	0.6992	0.0495	0.6568	0.071	0.4647	0.0873	0.2142	0.0971	0.55384			-0.1527	0.0607	-0.1725	0.0581	-1.0717	0.0857	-1.5856	0.0982	-0.3301	0.0998	-0.66252			0.0031	0.0109	-0.0104	0.01	0.0256	0.0126	0.0111	0.0141	-0.0129	0.0111	0.0033			0.5884	0.0645	0.516	0.0615	-0.3917	0.0826	-1.1094	0.0971	-0.1317
	CYS-127	-0.2105	0.0198	0.0568	0.023	-0.5547	0.0414	-0.5078	0.0419	-1.0754	0.0685	-0.45832			-0.1266	0.0103	-0.0628	0.0119	-0.4017	0.0345	-0.4635	0.033	-0.0279	0.0477	-0.2165			0.0202	0.0124	0.0302	0.0126	-0.0145	0.0115	-0.0124	0.0119	-0.0102	0.0091	0.00266			-0.3172	0.0187	0.025	0.0208	-0.9717	0.0263	-0.9846	0.0247	-1.1115
	PHE-128	-0.6911	0.0132	-0.4208	0.0129	-1.2848	0.0197	-1.2228	0.0204	-1.1814	0.0155	-0.96018			0.2482	0.0122	0.2911	0.0128	0.1745	0.018	0.0732	0.0177	0.1574	0.0153	0.18888			0.007	0.0126	0.0031	0.0121	-0.0234	0.0159	-0.0143	0.0151	-0.0023	0.015	-0.00598			-0.437	0.0187	-0.1275	0.0211	-1.1343	0.0245	-1.1652	0.025	-1.0269
	GLU-129	16.0957	0.1203	13.5385	0.1709	37.373	0.1722	34.8912	0.2136	26.7353	0.2252	25.7267			-0.7981	0.1328	-1.1696	0.1235	-3.9849	0.1519	-4.1318	0.1322	-3.0361	0.1215	-2.6241			0.0234	0.0141	0.0232	0.0157	0.0066	0.0139	-0.0109	0.0138	-0.0178	0.0122	0.0049			15.3249	0.1702	12.3854	0.2025	33.3973	0.2234	30.7534	0.2269	23.6767
	LEU-130	-1.0665	0.0079	-1.0025	0.0086	-2.0522	0.0121	-1.9713	0.013	-1.9328	0.012	-1.60506			0.3393	0.0058	0.3839	0.0041	0.7832	0.0102	0.7044	0.0105	0.5906	0.01	0.56028			0.0143	0.0128	0.0034	0.0114	-0.0128	0.0179	-0.0342	0.017	-0.0166	0.0185	-0.00918			-0.7127	0.0132	-0.6143	0.0127	-1.2799	0.0206	-1.3007	0.0188	-1.3584
	VAL-131	-0.779	0.0069	-0.704	0.0083	-1.6161	0.0137	-1.5745	0.0128	-1.6165	0.0157	-1.25802			0.2447	0.01	0.3028	0.0107	0.5591	0.0114	0.498	0.0104	0.3829	0.013	0.3975			-0.0122	0.0178	0.013	0.0166	0.018	0.0176	-0.0229	0.0147	0.005	0.016	0.00018			-0.5477	0.0199	-0.3888	0.0197	-1.04	0.0205	-1.1002	0.0173	-1.2279
	ASN-132	-0.588	0.0356	-0.7236	0.029	-1.6037	0.0695	-1.823	0.0524	-1.9071	0.049	-1.32908			0.6737	0.0725	0.7046	0.0737	0.1553	0.0823	-0.1102	0.0729	0.4443	0.0752	0.37354			0.0141	0.0148	-0.0062	0.0127	-0.0011	0.0133	0.0083	0.0118	0.0131	0.0139	0.00564			0.0996	0.0765	-0.0241	0.0774	-1.4474	0.0927	-1.9248	0.0839	-1.4492
	GLU-133	12.2043	0.0913	10.4921	0.1527	28.4613	0.1616	26.432	0.1745	19.0475	0.2037	19.3274			0.4779	0.1374	0.4269	0.1412	-1.4198	0.1403	-1.9552	0.121	-1.1668	0.1479	-0.7274			-0.0019	0.0152	0.0107	0.0175	0.0062	0.0113	0.0186	0.0125	-0.0106	0.0116	0.0046			12.6813	0.1627	10.9253	0.2021	27.0469	0.1971	24.495	0.1935	17.8716
	ARG-134	-16.6147	0.1129	-14.3442	0.1669	-33.0581	0.1912	-31.1782	0.1987	-24.8227	0.223	-24.0036			2.7405	0.0721	2.9263	0.0546	4.1285	0.0866	3.438	0.0727	4.2739	0.0875	3.50144			-0.0108	0.0191	0.0381	0.0177	-0.0016	0.0176	-0.0163	0.0163	0.01	0.0151	0.00388			-13.8852	0.1196	-11.3772	0.1663	-28.9271	0.175	-27.7474	0.183	-20.5342
	THR-135	-0.0543	0.0105	-0.0991	0.0119	-0.0899	0.0186	-0.1739	0.0169	-0.3143	0.0167	-0.1463			0.0183	0.0092	0.0081	0.0099	0.0366	0.0141	0.0357	0.0149	0.2131	0.0134	0.06236			0.0212	0.0098	-0.0031	0.011	0.0064	0.0121	-0.0178	0.0122	0.0022	0.0132	0.00178			-0.0141	0.0149	-0.094	0.0157	-0.0459	0.0215	-0.1561	0.0216	-0.0987
	GLU-136	11.131	0.0984	10.6789	0.1437	23.8	0.1942	21.2284	0.181	12.8112	0.1978	15.9299			0.5564	0.1416	0.3789	0.115	-1.7179	0.1397	-2.0908	0.1273	-1.0039	0.142	-0.77546			-0.0043	0.0124	0.0099	0.0104	-0.0114	0.0111	0.0183	0.011	-0.0162	0.0117	-0.00074			11.6829	0.172	11.0687	0.1899	22.0623	0.2212	19.1454	0.2361	11.8025
	ASP-137	14.6946	0.1249	15.1974	0.1713	26.693	0.2782	22.8167	0.2619	12.487	0.289	18.3777			-0.6909	0.1052	-0.6146	0.1133	-3.3008	0.1163	-3.5618	0.1108	-1.6407	0.1112	-1.96176			0.0085	0.0117	0.0028	0.0103	0.0246	0.0129	0.0001	0.0118	0.0108	0.0083	0.00936			14.0135	0.1586	14.5939	0.2079	23.4143	0.3085	19.2544	0.2609	10.8497
	GLU-138	11.1105	0.0897	10.7557	0.1439	21.0668	0.215	17.5642	0.1885	6.98	0.2413	13.4954			-0.2058	0.152	0.3818	0.1498	-0.8779	0.1581	-2.0146	0.1371	-0.2535	0.1579	-0.594			-0.0083	0.0085	0.0008	0.007	0.0004	0.0097	0.0063	0.0092	-0.0046	0.0078	-0.00108			10.8967	0.1678	11.1348	0.2035	20.1871	0.2566	15.5582	0.2225	6.7224
	SER-139	0.5326	0.0147	0.6256	0.018	0.666	0.0333	0.4745	0.0357	0.017	0.0467	0.46314			0.234	0.0429	0.2278	0.0474	-0.151	0.0564	-0.2747	0.0584	0.2051	0.0454	0.04824			-0.0045	0.0074	-0.0144	0.007	0.0116	0.0097	-0.0108	0.0082	-0.0146	0.0092	-0.00654			0.7613	0.0447	0.8379	0.0494	0.5279	0.0619	0.1903	0.0663	0.2028
	LEU-140	0.7066	0.008	0.7181	0.0086	1.177	0.016	0.9224	0.0185	0.4175	0.0253	0.78832			-0.1512	0.0094	-0.1837	0.011	-0.4794	0.0133	-0.3491	0.0123	0.0696	0.014	-0.21876			0.0231	0.0147	-0.0318	0.0165	0.0301	0.0178	0.0051	0.0184	-0.009	0.017	0.0035			0.5784	0.0178	0.5011	0.0198	0.7275	0.0244	0.5776	0.0224	0.4785
	ARG-141	-13.0548	0.0932	-12.2769	0.1479	-27.3876	0.1767	-24.3954	0.1763	-15.0802	0.2021	-18.439			1.3225	0.0473	1.3272	0.0551	2.7577	0.0596	2.2632	0.0505	2.3718	0.0559	2.00848			-0.0105	0.0135	0.0039	0.0118	0.0137	0.0167	0.0168	0.015	0.0248	0.0136	0.00974			-11.7354	0.0935	-10.9535	0.1552	-24.6124	0.1905	-22.1277	0.1818	-12.6774
	ALA-142	0.3289	0.0078	0.2934	0.0097	0.632	0.0194	0.5403	0.0196	0.1017	0.0304	0.37926			-0.0108	0.0137	-0.0599	0.0157	-0.1735	0.0165	-0.1784	0.0143	0.2504	0.0183	-0.03444			-0.0081	0.0053	-0.0122	0.0064	0.0099	0.0066	0.004	0.0064	-0.0073	0.0064	-0.00274			0.3101	0.016	0.2218	0.019	0.4669	0.023	0.3656	0.0204	0.3473
	LYS-143	-17.7198	0.2275	-18.3133	0.1837	-28.7259	0.4516	-21.7954	0.3566	-11.6758	0.5065	-19.646			1.8241	0.1359	1.8795	0.1265	2.4688	0.1714	1.2363	0.1418	1.5834	0.1668	1.79842			0.0047	0.0121	-0.005	0.0161	0.0141	0.0128	-0.0004	0.0144	-0.0177	0.0129	-0.00086			-15.905	0.2562	-16.4384	0.2209	-26.2615	0.4288	-20.5474	0.3441	-10.1422
	ALA-144	0.7477	0.0088	0.7101	0.0114	1.1941	0.0196	0.9581	0.0234	0.3263	0.0249	0.78726			-0.1553	0.0057	-0.1994	0.006	-0.4387	0.0119	-0.2533	0.013	0.5307	0.0205	-0.1032			-0.0107	0.0081	0.0266	0.0106	0.0043	0.0076	0.001	0.0072	-0.0189	0.0082	0.00046			0.5819	0.0105	0.5376	0.0146	0.7596	0.0187	0.7073	0.0177	0.8368
	LEU-145	0.399	0.01	0.3078	0.0105	0.9103	0.0194	0.8342	0.0171	0.7786	0.0201	0.64598			-0.0461	0.0084	-0.086	0.0087	-0.184	0.0128	-0.0915	0.0112	0.1067	0.0152	-0.06018			0.0109	0.0159	-0.0122	0.016	0.0255	0.0185	0.0109	0.0179	0.0104	0.0188	0.0091			0.3635	0.0199	0.2086	0.0198	0.7516	0.0259	0.752	0.0225	0.897
	VAL-146	0.0856	0.0098	-0.0046	0.0111	0.395	0.0253	0.3367	0.0265	-0.1378	0.0442	0.13498			0.0419	0.0122	0.0623	0.0129	-0.0058	0.0173	0.0779	0.0166	0.2507	0.0356	0.0854			-0.0022	0.0082	0.0004	0.0095	-0.0088	0.008	0.0105	0.0079	-0.0019	0.0079	-0.0004			0.1264	0.0163	0.0578	0.0168	0.379	0.0276	0.4254	0.024	0.1112
	TYR-147	0.3075	0.0355	0.4096	0.0389	0.1932	0.082	-0.625	0.0854	-6.5977	0.2212	-1.26248			0.4349	0.05	0.343	0.048	-0.1386	0.0705	-0.0278	0.0748	4.211	0.3221	0.9645			-0.0049	0.0119	-0.0041	0.0114	-0.0118	0.0182	-0.0318	0.0168	-0.9894	0.0341	-0.2084			0.7361	0.0545	0.7465	0.0632	0.0393	0.073	-0.6865	0.0695	-3.3693
	LEU-148	0.394	0.0115	0.2297	0.0149	0.9018	0.0255	0.8073	0.0237	0.8856	0.0224	0.64368			-0.0264	0.0084	-0.0722	0.0102	-0.0172	0.018	0.0506	0.0169	-0.0362	0.021	-0.02028			-0.0125	0.0132	-0.0054	0.0168	-0.0031	0.0127	-0.0065	0.0113	-0.0163	0.0146	-0.00876			0.3541	0.0164	0.1516	0.0211	0.8823	0.028	0.8516	0.0212	0.8322
	GLU-149	17.1581	0.1348	16.0187	0.2302	36.2139	0.2956	31.0193	0.3838	20.0336	0.2951	24.0887			0.5388	0.1451	0.1889	0.139	-1.8094	0.1544	-1.8768	0.1391	0.8942	0.1683	-0.41286			-0.0123	0.0148	0.0074	0.0134	-0.0025	0.0112	-0.009	0.0118	0.0153	0.0102	-0.00022			17.6855	0.1836	16.215	0.2671	34.3893	0.3415	29.1585	0.3867	20.9445
	ALA-150	-0.2207	0.0126	-0.3022	0.016	-0.0229	0.0832	-1.4475	0.1082	-1.3668	0.0701	-0.67202			0.2541	0.0216	0.2914	0.0228	1.2626	0.0892	2.6656	0.0971	2.2963	0.0809	1.354			0.015	0.0073	0.0185	0.0078	-0.2286	0.0155	-0.2383	0.0123	-0.2847	0.0139	-0.14362			0.0473	0.0239	0.0079	0.0295	1.0142	0.0571	0.9823	0.0693	0.648
	LEU-151	0.4723	0.0168	0.3223	0.0188	-4.295	0.1364	-4.7503	0.0999	-7.5365	0.0916	-3.15744			-0.3049	0.0094	-0.3682	0.0097	-0.1925	0.0328	-0.2859	0.033	-0.8096	0.0278	-0.39222			0.0189	0.013	-0.0002	0.0107	-0.5553	0.0204	-0.5524	0.0203	-0.9758	0.0203	-0.41296			0.1855	0.02	-0.046	0.0185	-5.0368	0.1369	-5.5832	0.1085	-9.3229
	LYS-152	6.9274	0.1866	7.4141	0.1927	6.366	0.5941	2.9754	0.5116	0.4529	0.2838	4.82716			0.5214	0.1928	-1.0724	0.223	10.083	0.6815	13.8332	0.6326	20.7673	0.367	8.8265			0.0053	0.0146	-0.0297	0.0151	-0.3794	0.0228	-0.4619	0.0183	-0.4924	0.0132	-0.27162			7.4528	0.2314	6.3094	0.2442	16.0958	0.3806	16.3374	0.4337	20.7311
RpoA	PHE-249	-10.3925	0.2365	-5.6822	0.371	-5.0916	0.3195	-4.6661	0.3381	-7.8914	0.2956	-6.74476			0.29	0.149	0.1166	0.1751	-3.1934	0.1536	-3.083	0.1895	-1.2877	0.1551	-1.4315			-0.0024	0.0097	0.0078	0.0088	-0.0137	0.012	0.013	0.0112	0.004	0.0103	0.00174			-10.1041	0.2565	-5.5718	0.3406	-8.3153	0.2419	-7.7194	0.2494	-9.1688
	ASP-250	-10.1383	0.8121	-16.047	1.0421	-37.7727	1.2512	-41.1834	1.4272	-25.2193	0.9635	-26.0721			13.194	1.011	19.6973	1.4123	32.1093	1.7416	36.6384	2.1081	13.7931	1.0045	23.0864			-0.0831	0.0125	-0.2486	0.0199	-0.1707	0.0147	-0.209	0.0163	-0.0426	0.0091	-0.1508			2.9877	0.5036	3.3961	0.573	-5.8838	0.6787	-4.7362	0.7773	-11.4763
	PRO-251	0.6182	0.0275	0.7644	0.0247	1.1465	0.0584	1.4679	0.057	1.1465	0.0431	1.0287			-0.2522	0.0362	-0.1708	0.0279	-0.8119	0.0648	-1.0678	0.0667	-0.5034	0.0425	-0.56122			-0.0044	0.0067	-0.0124	0.0052	-0.0631	0.0132	-0.0304	0.0111	-0.0088	0.0071	-0.02382			0.3601	0.0302	0.5805	0.0213	0.2666	0.0708	0.3699	0.0513	0.6327
	ILE-252	0.7895	0.0562	0.7997	0.0486	-2.892	0.1437	-2.3109	0.112	-1.835	0.1769	-1.08974			-0.5573	0.0706	-0.595	0.059	-2.6363	0.1339	-3.1467	0.1469	-1.3946	0.085	-1.66598			-0.0472	0.0225	0.0373	0.0148	-1.042	0.0262	-1.0336	0.0249	-0.6205	0.0403	-0.5412			0.1883	0.0865	0.242	0.0453	-6.5625	0.1936	-6.4931	0.1674	-3.8507
	LEU-253	1.4298	0.0338	1.3709	0.029	3.0023	0.0656	3.1542	0.0638	2.35	0.0432	2.26144			-0.3521	0.039	-0.2902	0.032	-1.5539	0.0835	-1.6403	0.0816	-0.5766	0.0451	-0.88262			-0.0512	0.0208	0.0143	0.0139	0.0116	0.0186	0.0209	0.0165	-0.0256	0.0165	-0.006			1.0262	0.0298	1.0962	0.0245	1.4598	0.0427	1.5342	0.039	1.7459
	LEU-254	1.1266	0.0217	1.144	0.0211	2.0071	0.0353	1.9796	0.0385	1.4508	0.0312	1.54162			-0.1636	0.0297	-0.0748	0.0249	-0.5988	0.0419	-0.6354	0.045	-0.2156	0.0315	-0.33764			-0.0046	0.0073	-0.0153	0.0117	-0.0113	0.011	-0.0163	0.0129	0.0019	0.0114	-0.00912			0.9574	0.0268	1.054	0.0245	1.3964	0.0322	1.3243	0.0359	1.2351
	ARG-255	-4.9723	0.331	-3.3172	0.3776	5.1808	0.5474	2.2767	0.5105	-0.4441	0.4035	-0.25522			-2.8597	0.1494	-1.1665	0.1351	-11.2517	0.4985	-8.7724	0.4103	-7.6675	0.3342	-6.34356			-0.0025	0.0078	0.0095	0.0078	-0.2248	0.0211	-0.0902	0.0166	-0.0045	0.0137	-0.0625			-7.8123	0.2673	-4.4604	0.3118	-6.3217	0.2593	-6.6101	0.2363	-8.1442
	PRO-256	-1.1754	0.0137	-1.4216	0.0125	-1.8766	0.0144	-1.8482	0.0149	-1.8239	0.0162	-1.62914			0.267	0.0176	0.2653	0.0166	0.3744	0.0237	0.3714	0.0227	0.5563	0.0231	0.36688			-0.0053	0.0066	0.0156	0.0069	-0.0114	0.0076	0.0172	0.0089	0.0035	0.0078	0.00392			-0.9145	0.0189	-1.14	0.0188	-1.5145	0.0208	-1.461	0.0199	-1.264
	VAL-257	-2.241	0.0239	-2.2328	0.0307	-2.4957	0.0256	-2.4381	0.0278	-2.0872	0.0291	-2.29896			1.2189	0.0244	0.8863	0.0273	1.0238	0.0259	1.1354	0.0247	1.2741	0.0285	1.1077			-0.0642	0.0138	-0.0872	0.0148	-0.0844	0.0151	-0.0945	0.0139	-0.0002	0.0138	-0.0661			-1.087	0.0285	-1.4337	0.0291	-1.5568	0.0273	-1.397	0.0314	-0.8144
	ASP-258	11.4838	0.2231	11.0943	0.27	8.5193	0.2456	8.9282	0.2363	9.3613	0.2302	9.87738			7.6738	0.1339	5.3728	0.1939	10.3595	0.2078	11.1708	0.1796	13.784	0.2076	9.67218			0.0127	0.0104	-0.0188	0.0151	-0.0207	0.0066	-0.0053	0.0062	0.0418	0.0093	0.00194			19.1695	0.1962	16.458	0.2415	18.8518	0.1614	20.0948	0.166	23.177
	ASP-259	-10.5412	0.4157	-10.9644	0.4668	-17.1358	0.4614	-15.8506	0.4725	-15.5163	0.4098	-14.0017			14.4935	0.3143	9.1833	0.3424	27.2264	0.6679	26.0568	0.6212	26.7603	0.5681	20.7441			-0.1173	0.0102	-0.0957	0.0096	-0.7841	0.0182	-0.729	0.0145	-0.4862	0.0129	-0.44246			3.8399	0.3669	-1.8803	0.3414	9.3078	0.4623	9.4879	0.4378	10.7628
	LEU-260	-2.955	0.0692	-3.355	0.0758	-5.6674	0.0653	-5.6768	0.0837	-6.1089	0.0694	-4.75262			1.267	0.0427	0.8421	0.0606	1.7429	0.0489	2.0905	0.0581	2.5521	0.0542	1.69892			-0.0966	0.0167	-0.0803	0.0188	-0.0715	0.0155	-0.0539	0.0142	-0.0441	0.0155	-0.06928			-1.7834	0.0713	-2.5912	0.0648	-3.9992	0.0598	-3.6408	0.0682	-3.5981
	GLU-261	-124.335	0.786	-121.12	1.0949	-129.348	0.9142	-119.643	0.8125	-124.247	0.6307	-123.739			190.208	0.9378	179.74	1.463	195.006	1.1773	186.47	1.1448	211.498	0.7705	192.585			-2.8179	0.0192	-2.6886	0.0239	-2.8502	0.0209	-2.6794	0.0231	-3.1311	0.0176	-2.83344			63.0194	0.6408	55.8922	0.7387	62.8584	0.7058	64.1535	0.7224	84.137
	LEU-262	-2.9992	0.115	-5.6377	0.1658	-4.9452	0.1108	-4.7932	0.1251	-7.6377	0.178	-5.2026			0.3677	0.1056	3.6402	0.2044	2.4872	0.0964	2.6408	0.1351	4.6351	0.1848	2.7542			0.0185	0.0148	0.0013	0.0172	0.0122	0.0173	-0.0094	0.0173	-0.124	0.0168	-0.02028			-2.6167	0.0405	-1.9887	0.0675	-2.4417	0.0479	-2.1576	0.0528	-3.1171
	THR-263	5.3334	0.2652	2.6356	0.0725	2.3687	0.0889	2.8324	0.0881	2.1951	0.1039	3.07304			-7.0397	0.2841	-2.5711	0.0791	-2.6964	0.0913	-2.7418	0.0914	-3.1673	0.1134	-3.64326			-0.2837	0.0133	-0.3285	0.016	-0.3318	0.0174	-0.3674	0.0169	-0.4424	0.0176	-0.35076			-1.9886	0.0871	-0.2619	0.0688	-0.6641	0.0893	-0.2734	0.0767	-1.4159
	VAL-264	0.1523	0.062	1.5541	0.0626	0.883	0.0709	1.2392	0.0728	1.59	0.1051	1.08372			1.0366	0.039	-0.1715	0.0339	-0.1041	0.0302	-0.0967	0.0343	-0.2624	0.0458	0.08038			0.0132	0.0136	0.0069	0.0135	-0.0206	0.0098	0.0382	0.0115	0.0011	0.0139	0.00776			1.2014	0.0594	1.389	0.0679	0.759	0.0681	1.1853	0.0696	1.3323
	ARG-265	-91.2542	0.5822	-96.4832	0.5555	-100.591	0.6959	-99.9656	0.6161	-106.822	0.7916	-99.0232			15.1317	0.6028	17.8396	0.5652	13.5481	0.6084	11.5897	0.6292	21.4809	0.6948	15.918			-0.3175	0.0122	-0.3141	0.0138	-0.1725	0.0099	-0.2831	0.0134	-0.4192	0.0171	-0.30128			-76.4099	0.2735	-78.9686	0.2342	-87.2642	0.2539	-88.6375	0.3068	-85.75
	SER-266	1.9106	0.1584	0.6552	0.1547	-0.9388	0.1046	0.1449	0.1548	0.0152	0.1985	0.35742			-3.2307	0.0997	-1.1196	0.0736	-0.6223	0.0514	-1.0853	0.076	-1.0972	0.0964	-1.43102			0.0547	0.0141	0.049	0.0144	-0.006	0.0166	0.0221	0.0116	0.0668	0.0166	0.03732			-1.262	0.0823	-0.4136	0.0926	-1.5724	0.0684	-0.9272	0.0889	-1.0072
	ALA-267	0.0068	0.0312	-0.2759	0.0315	0.087	0.0324	0.1063	0.0351	-0.2269	0.0418	-0.06054			-1.4795	0.0269	-0.8489	0.0257	-0.8907	0.0231	-1.0194	0.0199	-0.9718	0.0287	-1.04206			0.0937	0.0159	0.0113	0.0156	0.0225	0.0155	0.0133	0.0135	0.0299	0.0154	0.03414			-1.3802	0.0265	-1.1125	0.0268	-0.7807	0.0292	-0.9009	0.0295	-1.1687
	ASN-268	-0.8165	0.0579	-0.4561	0.0567	-0.1358	0.061	0.0127	0.0659	-0.1767	0.0854	-0.31448			0.5554	0.026	0.2206	0.0284	0.1926	0.0408	0.1186	0.0451	0.2523	0.0435	0.2679			0.0206	0.0082	0.0295	0.0101	0.02	0.0097	0.0193	0.0079	0.0058	0.0082	0.01904			-0.2417	0.0543	-0.2053	0.054	0.0801	0.0637	0.1475	0.0682	0.0816
	CYS-269	0.0958	0.0231	-0.1209	0.0253	-0.2313	0.0363	-0.0493	0.0364	-1.6337	0.0412	-0.38788			-0.5415	0.0136	-0.1429	0.0138	-0.1044	0.0145	-0.1863	0.0146	0.2656	0.0233	-0.1419			-0.0107	0.0088	0.0188	0.0099	-0.0219	0.0096	-0.0142	0.0077	0.0161	0.0064	-0.00238			-0.4559	0.0204	-0.2451	0.0218	-0.358	0.0307	-0.2492	0.027	-1.3516
	LEU-270	-0.567	0.021	-0.5488	0.0247	-0.5619	0.0279	-0.3578	0.0472	-0.6529	0.0308	-0.53768			-0.5646	0.017	-0.2222	0.0147	-0.2613	0.0163	-0.3884	0.0138	-0.3935	0.0169	-0.366			-0.0276	0.0137	0.0148	0.0158	0.0056	0.0154	0.0025	0.0115	0.087	0.0192	0.01646			-1.1595	0.0214	-0.7565	0.0254	-0.8171	0.0271	-0.7422	0.0434	-0.9591
	LYS-271	-17.7311	0.3052	-19.7238	0.2888	-14.9922	0.2609	-16.7739	0.2317	-13.9626	0.2482	-16.6367			-8.6279	0.1811	-4.6927	0.1802	-10.0101	0.2225	-9.9996	0.1844	-15.5478	0.2599	-9.77562			0.1123	0.0211	0.0452	0.0124	0.0341	0.0168	-0.0103	0.0116	0.0088	0.0109	0.03802			-26.2578	0.2369	-24.3901	0.241	-24.9778	0.1785	-26.7759	0.1738	-29.4996
	ALA-272	-0.6098	0.0163	-0.8183	0.0151	-0.7317	0.017	-0.613	0.0205	-0.6924	0.0242	-0.69304			-0.2623	0.0198	-0.0117	0.0261	-0.1381	0.0277	-0.2665	0.027	-0.1292	0.0233	-0.16156			-0.0432	0.0128	-0.0627	0.0179	-0.0704	0.0175	-0.0235	0.0115	-0.0275	0.0066	-0.04546			-0.9163	0.0254	-0.8925	0.0342	-0.9403	0.0316	-0.9048	0.0297	-0.8492
	GLU-273	45.9181	0.1681	50.0232	0.1654	52.0121	0.266	52.8129	0.2978	47.3918	0.1934	49.6316			2.0571	0.0895	0.252	0.0981	0.9583	0.1268	2.1247	0.1308	-0.3672	0.1166	1.00498			0.0026	0.0062	0.0101	0.0056	0.0017	0.0035	0.001	0.0038	-0.0765	0.0141	-0.01222			47.9836	0.1318	50.2797	0.139	52.9803	0.1831	54.9421	0.2277	46.9514
	ALA-274	-0.6051	0.0176	-0.9459	0.0186	-1.2539	0.0181	-0.963	0.0321	-1.5302	0.0171	-1.05962			0.1904	0.0091	0.0549	0.0143	0.0369	0.0141	0.0197	0.0192	0.0673	0.0283	0.07384			0.0084	0.0076	0.0471	0.0081	0.0188	0.0075	0.022	0.0072	0.0065	0.0074	0.02056			-0.4055	0.0209	-0.8451	0.0228	-1.1985	0.0208	-0.9219	0.0332	-1.4558
	ILE-275	-0.9392	0.0116	-0.5641	0.0203	-0.5992	0.022	-0.544	0.0312	-0.6638	0.017	-0.66206			0.1746	0.0235	0.2892	0.0258	0.2671	0.0264	0.2526	0.0219	0.2001	0.0181	0.23672			0.0409	0.0133	0.0288	0.0134	0.0447	0.0123	0.0463	0.014	-0.0192	0.0141	0.0283			-0.7241	0.029	-0.2461	0.0329	-0.286	0.0365	-0.2451	0.0376	-0.484
	HIS-276	-0.8975	0.0305	-1.0377	0.022	-1.4446	0.0226	-1.5057	0.072	-1.0918	0.0574	-1.19546			0.1374	0.045	0.2494	0.0507	0.2602	0.0469	0.6517	0.0557	0.4082	0.0605	0.34138			-0.0134	0.0112	0.0077	0.0071	0.0025	0.0072	0.0125	0.0088	0.0038	0.0087	0.00262			-0.7733	0.056	-0.7804	0.0521	-1.1809	0.0509	-0.842	0.1027	-0.6815
	TYR-277	0.4529	0.0222	0.3735	0.0295	0.8137	0.0367	0.9631	0.038	0.8301	0.0278	0.68666			0.3706	0.0439	0.2689	0.0364	0.0051	0.0539	0.0009	0.0487	0.0438	0.0499	0.13786			-0.0006	0.0064	0.0182	0.007	-0.005	0.0076	-0.0047	0.0081	-0.0215	0.009	-0.00272			0.8228	0.0464	0.6631	0.044	0.8107	0.0637	0.9586	0.0562	0.8519
	ILE-278	0.2265	0.0206	0.3938	0.0209	1.0836	0.0322	1.2197	0.0305	1.1464	0.0251	0.814			0.2217	0.012	0.0371	0.0091	-0.2484	0.0154	-0.2226	0.0183	-0.1406	0.0121	-0.07056			-0.0028	0.0128	0.0453	0.0153	-0.0159	0.016	0.0193	0.0186	0.0568	0.0166	0.02054			0.4452	0.0201	0.4764	0.0226	0.8186	0.0305	1.0168	0.0294	1.0615
	GLY-279	0.0043	0.0178	0.2854	0.0183	1.3164	0.0231	1.4165	0.0252	1.334	0.0206	0.87132			0.1314	0.013	0.019	0.0072	-0.2616	0.0118	-0.2522	0.0147	-0.1396	0.0092	-0.1006			0.003	0.0074	-0.0051	0.0037	-0.0004	0.0039	0.0031	0.0031	0.0053	0.004	0.00118			0.1386	0.0169	0.2986	0.015	1.0542	0.0184	1.1677	0.017	1.2002
	ASP-280	23.6254	0.1783	24.3846	0.2063	25.3892	0.2111	26.074	0.1992	27.0232	0.2002	25.2993			2.589	0.097	1.504	0.1276	2.0337	0.1167	1.8621	0.0987	1.2164	0.0845	1.84104			-0.0055	0.007	-0.0044	0.0086	0.0036	0.0047	-0.0029	0.0037	0.0044	0.0028	-0.00096			26.2016	0.1595	25.881	0.1822	27.4301	0.1887	27.9306	0.167	28.25
	LEU-281	1.6228	0.0198	1.6324	0.0176	2.4768	0.0199	2.5496	0.0189	2.2883	0.0175	2.11398			-0.3119	0.0123	-0.2695	0.01	-0.3373	0.0127	-0.329	0.0113	-0.3013	0.0131	-0.3098			0.0091	0.0194	-0.0317	0.0213	0.0254	0.0189	0.0077	0.02	0.0006	0.0208	0.00222			1.32	0.0242	1.331	0.0232	2.1636	0.0245	2.228	0.0254	1.988
	VAL-282	0.2992	0.0299	0.3519	0.0276	1.8556	0.0274	1.9974	0.0285	1.694	0.0257	1.23962			-0.0369	0.0122	-0.0793	0.0088	-0.2613	0.0118	-0.2576	0.0099	-0.1617	0.0103	-0.15936			0.0073	0.0118	0.0214	0.0132	-0.0084	0.0154	0.0056	0.0131	-0.0099	0.0083	0.0032			0.2683	0.0272	0.294	0.0279	1.585	0.0277	1.7458	0.0267	1.5223
	GLN-283	2.2288	0.0437	1.9066	0.0398	3.816	0.0329	3.8308	0.0424	0.7493	0.0576	2.5063			-0.259	0.0546	0.0342	0.0549	-0.2247	0.0298	-0.2156	0.031	0.0447	0.0167	-0.12408			0.0053	0.009	0.0051	0.0094	-0.015	0.0095	0.0109	0.0098	0.0068	0.0101	0.00262			1.976	0.0637	1.9471	0.0626	3.576	0.0353	3.6269	0.0417	0.8029
	ARG-284	-34.1409	0.2459	-34.285	0.2381	-40.3016	0.3359	-40.5013	0.239	-38.7332	0.1687	-37.5924			-1.0706	0.0766	-0.1552	0.0749	-0.3007	0.0821	-0.6139	0.0749	-0.1675	0.072	-0.46158			-0.0235	0.0136	-0.0082	0.0167	-0.0344	0.0151	-0.0042	0.0135	-0.0275	0.0126	-0.01956			-35.2289	0.2138	-34.4541	0.2046	-40.6372	0.3011	-41.1272	0.2125	-38.9258
	THR-285	2.0368	0.0276	2.1421	0.0275	1.9631	0.0305	1.795	0.0463	1.6706	0.0296	1.92152			-0.0121	0.0259	-0.0966	0.0263	-0.0731	0.023	-0.1074	0.0298	-0.2984	0.0218	-0.11752			0.0031	0.0071	-0.0155	0.0074	-0.0295	0.0075	-0.0143	0.0076	0.0063	0.0061	-0.00998			2.0282	0.0348	2.0284	0.0386	1.8606	0.0357	1.6725	0.0514	1.3774
	GLU-286	48.9933	0.586	49.6987	0.5251	67.2079	0.5225	70.3015	0.5521	67.8727	0.4918	60.8148			2.7016	0.2539	1.9357	0.3264	0.5279	0.1988	4.4881	0.4733	4.0667	0.4436	2.744			-0.1776	0.0187	-0.2625	0.0207	-0.2014	0.0181	-0.2886	0.0209	-0.2284	0.0185	-0.2317			51.5316	0.6218	51.3825	0.6889	67.4993	0.4683	74.5403	0.7924	71.7374
	VAL-287	1.6344	0.04	1.6118	0.0407	1.6103	0.0436	1.7219	0.0561	1.3935	0.0444	1.59438			-0.3157	0.019	-0.3273	0.0177	-0.4178	0.0168	-0.385	0.02	-0.5133	0.0207	-0.39182			0.0022	0.0087	-0.0022	0.0108	0.0172	0.0116	0.0148	0.0115	-0.0104	0.0117	0.00432			1.3201	0.0421	1.2817	0.045	1.2077	0.0445	1.3491	0.0562	0.8705
	GLU-288	40.0443	0.2397	41.8493	0.2505	50.4749	0.3074	52.2858	0.2512	48.0409	0.2128	46.539			1.501	0.0986	0.5908	0.1191	0.0457	0.1084	0.0799	0.1212	-0.5593	0.1103	0.33162			-0.0361	0.0122	0.0268	0.0139	-0.0475	0.0119	-0.0037	0.0113	-0.0218	0.0134	-0.01646			41.5146	0.2203	42.452	0.2415	50.4843	0.299	52.3425	0.237	47.4598
	LEU-289	0.4711	0.0371	0.5282	0.0378	0.4279	0.0424	0.3546	0.0537	0.3119	0.048	0.41874			-0.3538	0.0162	-0.3607	0.0191	-0.4537	0.02	-0.4261	0.0231	-0.4638	0.0255	-0.41162			0.0686	0.0179	-0.0005	0.0172	0.1009	0.0175	0.0501	0.0177	-0.0438	0.0198	0.03506			0.185	0.0328	0.1672	0.034	0.0736	0.039	-0.019	0.0459	-0.1951
	LEU-290	-0.442	0.0733	-0.0947	0.0728	-0.9731	0.0772	-0.5066	0.0722	-0.1984	0.0599	-0.44296			-0.3701	0.0255	-0.357	0.0268	-0.6389	0.033	-0.5637	0.0412	-0.6291	0.036	-0.51176			-0.3457	0.0176	-0.3887	0.021	-0.4892	0.0187	-0.5207	0.0197	-0.2633	0.0177	-0.40152			-1.1577	0.0875	-0.8412	0.0839	-2.1062	0.094	-1.5897	0.0899	-1.0947
	LYS-291	-55.6364	0.5152	-59.9421	0.6265	-84.6645	1.0128	-81.0347	0.8865	-63.9808	0.5361	-69.0517			1.5344	0.1296	1.3503	0.1337	1.1238	0.1732	0.654	0.1428	0.9717	0.1287	1.12684			0.0205	0.0097	-0.0016	0.0106	-0.0002	0.012	0.0224	0.0102	-0.0105	0.0128	0.00612			-54.0846	0.5434	-58.5843	0.6654	-83.512	0.9685	-80.3439	0.8916	-63.0229
	THR-292	-0.1489	0.0635	0.0204	0.0647	0.3886	0.0724	0.2976	0.0809	0.8646	0.0778	0.28446			-0.1916	0.0319	-0.4092	0.03	-0.2204	0.0368	-0.293	0.0451	-0.4945	0.0322	-0.32174			0.0446	0.0099	-0.0009	0.0069	0.0005	0.0087	-0.0084	0.0081	-0.013	0.0118	0.00456			-0.2937	0.0601	-0.3913	0.0615	0.1681	0.0748	-0.0031	0.0828	0.3608
	PRO-293	2.3354	0.045	2.5316	0.0369	2.1531	0.0585	2.1467	0.0603	2.6605	0.05	2.36546			-0.4907	0.0502	-0.7022	0.042	-0.0413	0.0359	-0.3794	0.0543	-0.7266	0.048	-0.46804			0.002	0.0095	0.0228	0.0082	0.0094	0.0059	0.0491	0.0078	-0.052	0.0115	0.00626			1.846	0.0303	1.8538	0.0294	2.1186	0.0476	1.8162	0.045	1.8803
	ASN-294	3.6034	0.0672	4.0202	0.0637	4.291	0.0626	4.4188	0.0669	4.2134	0.0688	4.10936			-0.9534	0.0594	-1.3949	0.0599	-1.0094	0.0474	-1.0883	0.0521	-1.3521	0.0527	-1.15962			0.0325	0.0098	0.0141	0.0095	-0.035	0.0083	-0.0176	0.0082	0.0064	0.0073	8e-05			2.6804	0.0451	2.6387	0.0506	3.245	0.053	3.3117	0.0554	2.8669
	LEU-295	1.1273	0.0563	1.0231	0.0595	1.6718	0.0571	1.4405	0.1053	1.4842	0.0735	1.34938			0.3897	0.0377	0.5704	0.0379	0.6021	0.0352	0.022	0.0692	0.3294	0.051	0.38272			-0.0005	0.0233	0.0793	0.0204	0.0158	0.0192	0.0061	0.016	0.0408	0.0209	0.0283			1.5191	0.0548	1.6708	0.0568	2.2886	0.0513	1.4663	0.1098	1.8581
	GLY-296	-10.8951	0.1173	-10.9995	0.1027	-10.507	0.1219	-11.0211	0.1171	-10.779	0.1084	-10.8403			7.427	0.0932	7.4603	0.0821	7.2758	0.1014	7.0585	0.0898	7.2115	0.0864	7.28662			-0.0706	0.0059	-0.0894	0.0073	-0.0394	0.0057	-0.0884	0.0074	-0.1049	0.0075	-0.07854			-3.5446	0.0498	-3.6287	0.0474	-3.2694	0.0443	-4.0486	0.0624	-3.676
	LYS-297	-233.354	0.9897	-234.819	0.9847	-255.252	0.9178	-257.072	0.9322	-238.251	0.9756	-243.75			145.383	1.2584	146.402	1.1782	153.12	0.9858	152.759	1.214	146.39	1.2068	148.811			-2.6	0.0168	-2.6465	0.0166	-2.6968	0.021	-2.6875	0.0173	-2.7371	0.0191	-2.67358			-90.6092	0.6573	-91.0617	0.6545	-104.796	0.6305	-107.031	0.587	-94.6671
	LYS-298	-120.673	1.3438	-127.809	1.3182	-153.982	1.2317	-144.477	1.2154	-139.113	1.5894	-137.211			26.8948	1.0913	39.7681	1.6016	58.8798	1.7014	43.7795	1.5713	49.5018	1.6216	43.7648			-1.4617	0.0288	-1.3086	0.0261	-1.6404	0.0257	-1.4287	0.0331	-1.6019	0.0224	-1.48826			-95.2133	1.0339	-89.3125	0.9809	-96.7814	1.1977	-102.131	1.0025	-91.2066
	SER-299	-11.9152	0.2043	-10.7694	0.211	-11.3443	0.2203	-10.5455	0.2091	-12.407	0.2368	-11.3963			8.0896	0.224	6.741	0.2072	7.066	0.2214	6.0586	0.1789	8.3563	0.2475	7.2623			0.0489	0.0129	0.0555	0.015	0.0118	0.018	0.0017	0.0139	0.0776	0.0161	0.0391			-3.7733	0.0872	-3.9564	0.081	-4.2665	0.0862	-4.478	0.089	-3.9827
	LEU-300	-11.593	0.0854	-11.3195	0.0803	-11.7014	0.09	-11.1853	0.0996	-11.3984	0.0745	-11.4395			4.511	0.0733	4.2089	0.0655	4.4897	0.0655	4.1828	0.0705	4.6822	0.0614	4.41492			-0.22	0.014	-0.1448	0.0142	-0.2207	0.014	-0.1753	0.0148	-0.2768	0.0151	-0.20752			-7.3018	0.0768	-7.2535	0.0807	-7.4328	0.0791	-7.1827	0.0816	-6.9966
	THR-301	-22.8401	0.4046	-24.252	0.3033	-25.0824	0.3063	-24.0301	0.4022	-23.2319	0.3608	-23.8873			14.3597	0.4227	16.2758	0.3079	17.1799	0.2936	16.8365	0.3323	14.9484	0.385	15.9201			-1.723	0.0147	-1.699	0.0141	-1.7289	0.0146	-1.6751	0.0154	-1.5218	0.0175	-1.66956			-10.2106	0.2004	-9.6912	0.1773	-9.6311	0.1854	-8.8777	0.2019	-9.8064
	GLU-302	-20.4149	0.7438	19.3201	0.5346	13.5112	0.6751	12.8568	0.5928	22.0877	0.7527	9.47218			75.721	0.95	17.7852	0.5131	23.9984	0.7263	24.5939	0.6584	23.2104	0.9728	33.0618			-0.6142	0.0144	-0.0735	0.012	-0.2453	0.0141	-0.1592	0.012	-0.3491	0.0169	-0.28826			54.7307	0.5153	37.0128	0.3166	37.2731	0.3212	37.2751	0.4025	44.9622
	ILE-303	-5.5915	0.0423	-5.775	0.0393	-5.7414	0.0479	-5.7547	0.0386	-5.8479	0.0407	-5.7421			0.7685	0.0517	0.8571	0.0367	0.5784	0.0426	0.5981	0.0375	0.9535	0.0457	0.75112			-0.0298	0.018	0.089	0.0163	0.044	0.0159	-0.0404	0.0173	0.0005	0.0167	0.01266			-4.8528	0.0337	-4.8285	0.027	-5.1225	0.0314	-5.1967	0.0287	-4.8934
	LYS-304	-57.035	0.9723	-59.3268	0.9572	-70.5932	0.7805	-79.3191	0.7246	-75.2216	0.8718	-68.2991			30.1135	1.2971	29.818	1.247	17.4109	1.0601	27.4504	1.1942	27.1624	1.4192	26.391			-0.8214	0.0226	-0.7789	0.0196	-0.7751	0.0175	-0.7942	0.0154	-0.6899	0.0224	-0.7719			-27.7456	0.6802	-30.2985	0.6559	-53.9827	0.7013	-52.7067	0.6961	-48.7933
	ASP-305	9.1874	0.8634	3.705	0.7438	-8.1951	0.9787	-20.3723	0.9217	-16.2907	0.7592	-6.39314			16.0653	1.0696	20.9626	1.0607	57.6416	1.1203	72.9177	1.248	65.2004	0.9928	46.5575			-0.7935	0.0217	-0.9427	0.0201	-1.4698	0.0239	-1.7109	0.0194	-1.6112	0.019	-1.30562			24.431	0.8992	23.6931	0.8266	47.98	0.57	50.8483	0.659	47.2273
	VAL-306	-7.5989	0.1102	-9.3395	0.0792	-9.5556	0.0751	-9.4126	0.0793	-10.8636	0.1298	-9.35404			-1.018	0.0994	1.0364	0.0773	0.2784	0.0818	0.1355	0.0735	0.1178	0.0868	0.11002			-0.5173	0.0205	-0.5065	0.0172	-0.4485	0.0138	-0.422	0.0168	-0.5965	0.0157	-0.49816			-9.1326	0.0996	-8.8114	0.0937	-9.7273	0.0921	-9.7019	0.0918	-11.3396
	LEU-307	-4.8129	0.0819	-5.7162	0.0642	-6.3008	0.0834	-6.0673	0.0581	-6.1477	0.082	-5.80898			0.9818	0.0922	1.5038	0.0698	1.2418	0.0894	0.8362	0.0672	0.9731	0.0847	1.10734			-0.0054	0.0162	0.0267	0.0144	-0.0003	0.017	-0.0078	0.0161	0.0004	0.018	0.00272			-3.8366	0.0391	-4.1845	0.0396	-5.0573	0.0361	-5.237	0.0322	-5.1742
	ALA-308	-11.2729	0.1403	-13.1431	0.1756	-8.7188	0.1507	-8.2556	0.1115	-8.7552	0.1473	-10.0291			7.3461	0.1891	8.3051	0.1944	3.4149	0.1501	2.4926	0.112	2.8126	0.1511	4.87426			-0.4262	0.0159	-0.4564	0.0148	-0.4849	0.0139	-0.5647	0.014	-0.4941	0.0131	-0.48526			-4.347	0.09	-5.2873	0.0884	-5.7897	0.0845	-6.3272	0.0832	-6.435
	SER-309	-19.619	0.1864	-23.1684	0.2136	-30.6378	0.3244	-30.2853	0.3062	-33.7471	0.4502	-27.4915			23.927	0.2251	26.6997	0.2675	33.2499	0.493	32.3021	0.4478	35.9219	0.59	30.4201			-2.262	0.0158	-2.2697	0.0153	-2.2029	0.0199	-2.1942	0.0168	-2.3319	0.0188	-2.25214			2.047	0.2092	1.2731	0.2439	0.4313	0.3016	-0.1694	0.2667	-0.1494
	ARG-310	-9.1441	0.7118	-6.7781	0.6055	-32.3487	0.516	-31.7481	0.5827	-29.751	0.6231	-21.954			17.1401	0.7573	20.1989	0.4806	50.7402	0.5972	49.6872	0.6077	48.8908	0.6751	37.3314			-1.3201	0.0257	-1.4093	0.0261	-1.7836	0.0269	-1.7111	0.0276	-1.6885	0.0256	-1.58252			6.6596	0.4494	12.0283	0.5241	16.5713	0.4488	16.2434	0.4829	17.4317
	GLY-311	-9.5196	0.3283	-7.8752	0.2666	-3.4203	0.1636	-2.9324	0.1589	-3.0646	0.1516	-5.36242			6.0857	0.403	3.1715	0.3521	0.7622	0.119	0.3158	0.1185	0.2273	0.1214	2.1125			-0.7598	0.021	-0.5869	0.0201	-0.0338	0.0068	-0.0191	0.0052	-0.0102	0.0074	-0.28196			-4.1687	0.1547	-5.2709	0.1312	-2.6825	0.0995	-2.6407	0.0997	-2.8573
	LEU-312	-4.8125	0.2067	-3.3473	0.1343	-0.1598	0.0529	-0.0472	0.0504	-0.2682	0.0402	-1.727			2.7481	0.2181	1.0353	0.0924	-0.1681	0.0276	-0.2366	0.0291	-0.0834	0.0235	0.65906			0.0025	0.0203	-0.0053	0.0186	-0.0704	0.0165	-0.0402	0.0149	-0.0643	0.015	-0.03554			-2.0742	0.0803	-2.3135	0.0797	-0.3985	0.0475	-0.3239	0.0428	-0.418
	SER-313	0.3472	0.2564	-0.1115	0.2266	0.2271	0.0567	0.1931	0.0712	0.2205	0.0749	0.17528			0.7501	0.2335	0.8555	0.171	0.1096	0.0384	0.0735	0.0451	-0.0777	0.047	0.3422			-0.046	0.009	-0.0423	0.0099	-0.0075	0.0067	-0.0117	0.0066	0.0097	0.0054	-0.01956			1.0515	0.1077	0.7012	0.1243	0.3267	0.0704	0.256	0.0781	0.1516
	LEU-314	-1.4637	0.0687	-1.189	0.0674	-0.7468	0.0543	-0.6651	0.0499	-0.607	0.0479	-0.93432			0.232	0.0365	0.2888	0.0303	0.2793	0.0311	0.1987	0.0298	0.0818	0.0299	0.21612			0.019	0.0158	-0.0176	0.0157	0.015	0.0143	-0.046	0.0151	0.0064	0.0158	-0.00464			-1.2137	0.0584	-0.9172	0.0681	-0.4551	0.0574	-0.5107	0.0578	-0.5191
	GLY-315	-0.3417	0.0493	-0.3575	0.0498	0.3568	0.0337	0.2607	0.0334	0.1911	0.0346	0.02188			-0.1469	0.0274	0.0347	0.0273	0.0304	0.0244	-0.0139	0.0238	0.0118	0.0242	-0.01678			0.0072	0.0055	-0.0104	0.0072	-0.0059	0.0064	0.0032	0.0088	0.0113	0.0065	0.00108			-0.482	0.0471	-0.3357	0.0535	0.3799	0.0354	0.2503	0.0372	0.2155
	MET-316	-2.6082	0.1139	-1.8747	0.1138	-1.6138	0.0894	-1.8123	0.1036	-1.41	0.0754	-1.8638			1.785	0.1076	0.994	0.0796	0.3898	0.0291	0.3488	0.0237	0.1632	0.0242	0.73616			0.0014	0.0139	0.0006	0.0106	-0.0101	0.0114	-0.0143	0.0107	0.0047	0.0087	-0.00354			-0.8264	0.0733	-0.8812	0.081	-1.2322	0.0824	-1.4792	0.0971	-1.2417
	ARG-317	-23.2874	0.2635	-25.9635	0.3311	-32.1695	0.234	-34.9851	0.2859	-36.3386	0.2193	-30.5488			-0.1667	0.1009	-0.0499	0.0831	-0.4298	0.0748	-0.4542	0.0823	-0.2086	0.0751	-0.26184			0.0126	0.0071	0.0065	0.0089	-0.0058	0.008	0.0033	0.0081	-0.0154	0.0101	0.00024			-23.4553	0.2746	-25.9991	0.3193	-32.6026	0.2248	-35.4273	0.2935	-36.5536
	LEU-318	0.7591	0.0222	0.2374	0.0202	0.571	0.023	0.5318	0.0266	0.3344	0.0227	0.48674			-0.1531	0.0133	-0.0084	0.0073	-0.0602	0.0109	-0.0226	0.0103	-0.0082	0.0091	-0.0505			-0.0154	0.017	0.0315	0.0116	0.0269	0.0155	0.0124	0.0132	-0.0167	0.0122	0.00774			0.5895	0.0232	0.2606	0.0221	0.5383	0.0236	0.5217	0.0268	0.3082
	GLU-319	13.0309	0.2601	19.5151	0.1999	-4.0897	0.5068	-3.7761	0.5258	3.1312	0.4561	5.56228			2.1913	0.1317	1.6195	0.162	4.9312	0.2425	4.9295	0.2837	1.4614	0.164	3.02658			-0.0033	0.0086	-0.0074	0.0074	0.0095	0.0081	0.0102	0.0084	-0.0106	0.0068	-0.00032			15.2259	0.2854	21.1281	0.2372	0.8593	0.3615	1.1665	0.3638	4.5857
	ASN-320	-0.554	0.0181	-0.181	0.0275	-0.4214	0.0799	-0.6436	0.0761	0.4241	0.0679	-0.27518			0.2203	0.042	0.215	0.0353	0.5898	0.063	0.2886	0.0556	0.1039	0.0564	0.28352			0.005	0.0077	0.0136	0.0071	-0.008	0.0068	0.0087	0.0087	0.0089	0.0092	0.00564			-0.3289	0.0424	0.0481	0.0408	0.1592	0.093	-0.3456	0.0924	0.5366
	TRP-321	0.5653	0.0205	0.9786	0.0138	-0.1239	0.0177	1.0597	0.03	-0.1414	0.0368	0.46766			0.4282	0.0369	0.3154	0.0363	0.2307	0.0442	0.3406	0.0431	0.069	0.0392	0.27678			-0.0003	0.0082	-0.001	0.0049	-0.0105	0.0063	0.0146	0.0066	0.0046	0.0061	0.00148			0.9928	0.041	1.2926	0.0394	0.0954	0.046	1.4128	0.0516	-0.0696
	PRO-322	-0.2724	0.0097	0.0117	0.0107	-1.0197	0.0099	-1.0592	0.0093	-0.9812	0.0067	-0.66416			0.2257	0.0102	0.1619	0.0132	0.1165	0.0055	0.1008	0.006	0.0432	0.004	0.12962			-0.0045	0.006	-0.0139	0.0102	-0.0227	0.0122	0.0079	0.0117	0.0004	0.0111	-0.00656			-0.0519	0.0129	0.1587	0.0189	-0.9256	0.0152	-0.9503	0.0149	-0.9375
	PRO-323	-0.0371	0.0084	-0.2988	0.0077	0.0641	0.0129	0.0587	0.0128	0.056	0.0095	-0.03142			0.0531	0.0231	0.1038	0.0162	-0.1184	0.006	-0.1195	0.0056	-0.0547	0.0054	-0.02714			-0.005	0.0126	-0.0086	0.0062	-0.0194	0.0078	-0.0173	0.0079	-0.0357	0.0122	-0.0172			0.0103	0.0261	-0.2033	0.0192	-0.0722	0.0146	-0.0784	0.0147	-0.0342
	ALA-324	0.2604	0.0157	-0.0885	0.0196	-0.737	0.021	-0.7752	0.0176	-0.4365	0.0176	-0.35536			-0.0029	0.0204	0.1861	0.0318	0.0189	0.021	0.0085	0.0206	-0.0503	0.0179	0.03206			-0.0063	0.0044	0.0079	0.0076	0.0125	0.0083	-0.0092	0.0089	0.0095	0.0082	0.00288			0.2519	0.026	0.1065	0.0391	-0.7044	0.0274	-0.7755	0.0261	-0.4772
	SER-325	0.3285	0.045	-0.055	0.0293	-0.0817	0.0239	-0.0549	0.0205	0.1461	0.0193	0.0566			0.381	0.0472	0.4567	0.0538	-0.0497	0.0555	-0.1821	0.053	-0.0158	0.0508	0.11802			-0.0085	0.009	0.0015	0.0071	-0.0045	0.0036	0.004	0.0043	-0.0001	0.0057	-0.00152			0.6989	0.0621	0.4024	0.0629	-0.1357	0.056	-0.2335	0.0585	0.132
	ILE-326	-0.1713	0.0222	0.0232	0.0157	-0.1539	0.0157	-0.1447	0.0154	-0.0653	0.0168	-0.1024			0.0943	0.0247	0.1208	0.0292	0.0249	0.0203	0.0057	0.024	-0.0802	0.0233	0.0331			-0.0204	0.0117	-0.0208	0.0097	-0.0175	0.012	-0.0237	0.0124	0.0219	0.0141	-0.0121			-0.0972	0.0368	0.1218	0.0346	-0.1452	0.0287	-0.1631	0.0286	-0.122
	ALA-327	0.0435	0.0156	-0.0325	0.0152	-0.1701	0.0162	-0.3107	0.0241	-0.1607	0.019	-0.1261			0.1978	0.0283	0.1506	0.0314	0.0577	0.0169	0.0321	0.0222	-0.0293	0.0246	0.08178			-0.0055	0.0081	-0.0096	0.0082	-0.0118	0.01	0.0137	0.0113	0.0079	0.0122	-0.00106			0.2356	0.0319	0.1098	0.0372	-0.1238	0.0218	-0.2647	0.0344	-0.1824
	ASP-328	26.1644	0.2237	25.6861	0.2823	14.1765	0.2082	16.8283	0.2694	21.4194	0.1747	20.8549			1.908	0.1377	1.2789	0.1359	1.6085	0.1257	0.9903	0.1332	0.4235	0.1266	1.24184			-0.0004	0.0063	-0.0124	0.0075	0.0066	0.007	-0.0115	0.0067	0.0016	0.0077	-0.00322			28.0666	0.2483	26.9358	0.2934	15.7863	0.2233	17.798	0.2881	21.8431
	GLU-329	56.4133	0.3907	47.8874	0.6978	18.0836	0.5131	23.1777	0.6701	32.5328	0.4384	35.619			3.0638	0.192	2.062	0.2317	3.109	0.2042	2.3408	0.2137	0.5374	0.1989	2.2226			-0.0038	0.0064	-0.0157	0.0077	-0.0008	0.0075	0.0014	0.0071	0.0144	0.0077	-0.0009			59.4698	0.4275	49.9432	0.7384	21.1592	0.4995	25.5295	0.6239	33.0764
[truncated: 2 more columns]

## Sheet: TPR2
Protein	#Residues	MM_Energy(+/-)dev/error													Polar_Energy(+/-)dev/error													Apolar_Energy(+/-)dev/error													Total_Energy(+/-)dev/error
		Frame1		Frame2		Frame3		Frame4		Frame5		Average			Frame1		Frame2		Frame3		Frame4		Frame5		Average			Frame1		Frame2		Frame3		Frame4		Frame5		Average			Frame1		Frame2		Frame3		Frame4		Frame5
InvF	MET-1	-34.5908	0.2217	-37.711	0.1495	-32.7542	0.2198	-35.7932	0.2121	-31.3517	0.2157	-34.4402			2.4237	0.124	1.9387	0.1337	1.2074	0.1269	1.9658	0.1324	1.1392	0.1418	1.73496			0.0094	0.014	0.0784	0.0219	0.0269	0.0131	0.0385	0.0141	0.0744	0.0181	0.04552			-32.1596	0.23	-35.7076	0.1786	-31.5274	0.2189	-33.7759	0.2208	-30.1498
	LEU-2	1.0683	0.0131	1.1425	0.0134	0.8262	0.0188	1.0411	0.0187	0.7897	0.0181	0.97356			-0.1922	0.0091	-0.1605	0.0086	-0.0275	0.0164	-0.1977	0.0152	-0.07	0.0155	-0.12958			-0.0315	0.0138	0.0017	0.0121	0.0024	0.01	-0.0028	0.0102	0.0047	0.0084	-0.0051			0.8451	0.016	0.9833	0.0169	0.8008	0.0147	0.8409	0.0156	0.7251
	ASN-3	0.9384	0.0518	0.714	0.0637	0.3937	0.0447	0.3596	0.0565	0.7802	0.058	0.63718			0.4673	0.0826	0.4562	0.0584	0.6304	0.0744	0.413	0.0644	0.8753	0.0824	0.56844			0.0003	0.013	0.0169	0.0102	-0.0177	0.011	0.0218	0.0108	0.0215	0.0101	0.00856			1.4028	0.0977	1.1877	0.0841	1.0008	0.0841	0.7938	0.077	1.6735
	THR-4	0.724	0.035	1.5432	0.0402	0.8381	0.0625	1.6795	0.0789	1.2581	0.0645	1.20858			0.2346	0.0439	-0.0655	0.0594	0.0963	0.0746	-0.8073	0.0951	-0.3843	0.0705	-0.18524			-0.0121	0.0069	0.0016	0.0047	-0.0083	0.0071	-0.0123	0.0069	-0.0039	0.0072	-0.007			0.9443	0.0476	1.4759	0.0532	0.9304	0.0513	0.8615	0.0615	0.8676
	GLN-5	1.2521	0.0373	1.3125	0.032	0.5413	0.0414	0.7546	0.0439	0.7518	0.0424	0.92246			-0.2648	0.0184	-0.1498	0.0159	0.0282	0.0279	-0.1561	0.0304	-0.1538	0.028	-0.13926			-0.0066	0.0106	-0.01	0.0081	-0.0013	0.0094	-0.0013	0.0095	-0.0169	0.0123	-0.00722			0.9801	0.0323	1.1523	0.0305	0.5705	0.03	0.5984	0.039	0.582
	GLU-6	64.594	1.2215	65.0682	0.7939	41.6439	2.0145	41.3331	1.1907	44.6973	1.5857	51.4673			3.371	1.3583	6.5359	0.6474	29.8007	2.5331	45.1815	1.9685	21.4449	2.5857	21.2668			-0.6804	0.0248	-0.6288	0.0184	-0.8385	0.0317	-1.0293	0.0294	-0.5333	0.0345	-0.74206			67.2688	0.6782	70.9735	0.5919	70.5426	1.0127	85.4819	1.2559	65.7278
	VAL-7	1.0982	0.055	-0.2771	0.0318	-1.1886	0.1276	-0.8707	0.1245	-0.721	0.1151	-0.39184			-0.1044	0.0509	0.3602	0.0394	1.1378	0.1544	0.9105	0.142	1.0696	0.142	0.67474			-0.0262	0.0154	0.0164	0.0166	-0.0987	0.0201	-0.0877	0.0164	-0.0555	0.0168	-0.05034			0.9691	0.0506	0.0985	0.0492	-0.1438	0.0838	-0.0439	0.0686	0.2903
	LEU-8	-2.2464	0.0531	-1.8756	0.0387	-1.7629	0.0564	-1.4473	0.0365	-1.2618	0.04	-1.7188			0.1203	0.0121	0.0419	0.0098	0.0454	0.0185	0.0779	0.0138	0.0896	0.0177	0.07502			-0.1239	0.0205	-0.1174	0.0241	-0.146	0.0248	-0.1108	0.0222	-0.0952	0.0223	-0.11866			-2.2504	0.0574	-1.9479	0.0529	-1.8623	0.0614	-1.4808	0.0418	-1.2663
	LYS-9	-58.1143	0.6994	-50.9465	0.2703	-39.2799	0.6424	-46.3644	0.5217	-43.7548	0.5496	-47.692			2.5874	0.2005	1.7951	0.121	-1.4767	0.3349	-0.0951	0.2165	0.9215	0.2234	0.74644			-0.0346	0.0131	0.0315	0.011	-0.0288	0.0116	-0.0552	0.0128	-0.0019	0.0133	-0.0178			-55.5878	0.6434	-49.1332	0.2878	-40.796	0.5387	-46.5072	0.4606	-42.8461
	GLU-10	60.6909	0.3057	55.612	0.2051	47.0474	0.3776	52.9451	0.3173	52.2819	0.2654	53.7155			-1.3427	0.122	-1.0031	0.1001	0.2997	0.1715	-0.5639	0.136	0.0377	0.1275	-0.51446			-0.029	0.0079	0.0125	0.0084	-0.0138	0.01	-0.0213	0.0092	-0.0119	0.0078	-0.0127			59.3064	0.3009	54.6389	0.2199	47.3208	0.2969	52.3592	0.2628	52.3054
	GLY-11	0.8841	0.0353	1.2751	0.0348	-0.2224	0.0319	-0.1003	0.0344	0.8545	0.0334	0.5382			-0.2587	0.041	-0.1878	0.0342	0.2069	0.0214	0.1524	0.0247	-0.0841	0.0338	-0.03426			0.0006	0.0033	-0.0013	0.0043	0.0039	0.0031	0.0021	0.0029	0.0015	0.0046	0.00136			0.6288	0.0434	1.0835	0.0433	-0.0128	0.0258	0.0543	0.024	0.7742
	GLU-12	95.2863	0.4267	80.5473	0.5584	71.6848	0.5639	82.8257	0.5133	83.2936	0.5758	82.7275			-3.7456	0.2465	-1.9241	0.1847	-1.5334	0.1692	-2.6136	0.189	-1.9193	0.2191	-2.3472			0.0087	0.0068	0.0025	0.008	0.0013	0.0116	-0.0249	0.0094	-0.0058	0.0077	-0.00364			91.5456	0.4044	78.6272	0.4836	70.1716	0.5003	80.1801	0.4451	81.3956
	LYS-13	-119.831	0.9173	-125.261	0.8553	-122.502	1.0786	-138.965	0.8181	-125.517	1.0323	-126.415			31.7073	1.2054	44.9082	1.1906	36.0198	1.4268	53.6531	1.308	42.781	1.3371	41.8139			-0.1452	0.0158	-0.2435	0.016	-0.1852	0.0185	-0.2941	0.0175	-0.2003	0.0144	-0.21366			-88.2611	0.5861	-80.5728	0.5612	-86.5917	0.753	-85.5061	0.7496	-82.8398
	ARG-14	-88.4973	0.5543	-74.3005	0.3583	-65.0967	0.5678	-76.1697	0.5955	-70.2527	0.5664	-74.8634			6.682	0.2781	4.3996	0.1332	1.9375	0.2907	4.9044	0.2885	3.1975	0.2518	4.2242			-0.0817	0.0221	0.0849	0.0196	-0.0895	0.0203	-0.1293	0.0204	-0.0785	0.0199	-0.05882			-81.8928	0.4502	-69.8083	0.3104	-63.2546	0.3999	-71.3913	0.409	-67.1657
	LYS-15	-129.877	1.6319	-122.427	1.7402	-109.212	1.3474	-126.513	1.2532	-111.743	1.1968	-119.954			30.6123	1.9266	35.9385	2.2068	17.818	1.3612	31.7063	1.6582	17.8898	1.4808	26.793			-1.4436	0.0289	-1.4353	0.0256	-1.5464	0.0239	-1.7641	0.024	-1.6397	0.0239	-1.56582			-100.745	0.8159	-87.9188	0.7767	-92.8675	0.5495	-96.5091	0.7724	-95.4985
	ILE-16	-11.0573	0.1191	-11.2977	0.132	-10.496	0.1215	-11.006	0.1338	-11.2262	0.1196	-11.0166			5.8499	0.0967	4.9254	0.103	4.0085	0.0836	3.7776	0.0724	3.8172	0.0724	4.47572			-0.5313	0.0174	-0.5008	0.0182	-0.4521	0.0176	-0.5237	0.0204	-0.5101	0.0218	-0.5036			-5.7446	0.1245	-6.8817	0.1262	-6.9339	0.1101	-7.7504	0.1482	-7.9193
	ARG-17	-180.059	1.16	-180.078	1.4521	-149.946	1.1425	-161.281	1.022	-128.823	0.7054	-160.037			95.4184	1.1787	89.9784	1.5203	47.4344	1.7208	65.79	1.2599	27.6745	0.4446	65.2591			-2.9913	0.0329	-3.1988	0.0326	-1.9836	0.0367	-2.1562	0.0348	-1.9726	0.0261	-2.4605			-87.6035	0.573	-93.2715	0.5015	-104.532	0.8162	-97.6618	0.5832	-103.168
	SER-18	0.5231	0.1323	-3.6627	0.099	1.7325	0.0594	1.3751	0.0718	0.3981	0.0749	0.07322			0.7527	0.1526	2.4922	0.0968	0.2291	0.0459	0.2343	0.0531	1.0348	0.0731	0.94862			-0.1218	0.0082	-0.0154	0.006	-0.0087	0.0063	-0.0061	0.0046	-0.0127	0.0052	-0.03294			1.1505	0.0883	-1.1881	0.0671	1.9526	0.0607	1.6031	0.0585	1.4215
	PRO-19	-7.196	0.2066	-8.8365	0.0833	-1.045	0.0541	-1.818	0.0592	-2.2721	0.0921	-4.23352			4.3573	0.1891	3.3951	0.0883	-0.3297	0.0161	-0.2661	0.0143	-0.0443	0.0267	1.42246			-0.1356	0.0142	-0.508	0.0205	-0.0236	0.0128	-0.079	0.0146	-0.1134	0.0208	-0.17192			-2.978	0.0857	-5.9492	0.0641	-1.4001	0.0532	-2.1642	0.0588	-2.4299
	GLU-20	101.862	0.5516	103.643	0.4183	80.1449	0.315	83.4387	0.4061	75.7062	0.5166	88.959			-27.6728	0.6622	-18.5815	0.309	-4.6331	0.1228	-5.9539	0.1471	-3.4237	0.343	-12.053			-0.3016	0.018	-0.0625	0.0129	0.0088	0.0108	0.0042	0.0113	0.014	0.0086	-0.06742			73.8869	0.3514	84.9971	0.3018	75.504	0.2997	77.4713	0.3722	72.2996
	ALA-21	0.3229	0.0403	0.8467	0.0366	0.6571	0.0276	0.7305	0.0308	0.6987	0.0283	0.65118			-0.0591	0.0208	-0.1261	0.0171	-0.0185	0.0071	-0.185	0.0121	-0.1713	0.009	-0.112			-0.0139	0.0103	0.029	0.008	-0.0037	0.0088	-0.0072	0.01	-0.0155	0.0094	-0.00226			0.2495	0.025	0.7506	0.0237	0.6357	0.0251	0.5388	0.0277	0.5131
	TRP-22	-3.5202	0.0573	-4.6977	0.0712	-3.2397	0.0528	-3.6828	0.0536	-3.7749	0.0649	-3.78306			0.4236	0.0333	0.4715	0.0522	0.5794	0.0293	0.452	0.035	0.5925	0.043	0.5038			-0.0176	0.0097	-0.0972	0.0094	-0.0249	0.0106	-0.0167	0.0084	-0.0095	0.0071	-0.03318			-3.1148	0.054	-4.3221	0.0744	-2.6848	0.0592	-3.246	0.06	-3.195
	PHE-23	1.0341	0.0235	0.8691	0.0211	0.7402	0.0243	0.8237	0.0236	0.7842	0.0192	0.85026			-0.2722	0.0111	-0.1521	0.0093	-0.0545	0.0124	-0.152	0.0095	-0.1351	0.0105	-0.15318			0.0078	0.006	0.019	0.0071	-0.0184	0.0077	-0.0114	0.0095	0.0155	0.0055	0.0025			0.7696	0.0165	0.7356	0.0168	0.6657	0.0181	0.6591	0.0198	0.6651
	ILE-24	-1.0968	0.0153	-1.033	0.0102	-0.8424	0.0133	-1.0124	0.0132	-0.9207	0.0099	-0.98106			0.1588	0.0071	0.1323	0.0063	0.0599	0.0082	0.1297	0.0078	0.1055	0.0057	0.11724			0.0051	0.0111	-0.0322	0.0129	0.0148	0.0115	0.0204	0.0116	-0.0012	0.0103	0.00138			-0.9322	0.0157	-0.933	0.0162	-0.7678	0.0159	-0.8614	0.0152	-0.8168
	GLN-25	2.7677	0.0246	2.8357	0.0207	2.061	0.0329	2.6878	0.0252	2.1268	0.0321	2.4958			-0.3426	0.0366	-0.3356	0.0239	0.0802	0.0412	-0.1614	0.0364	-0.0791	0.0303	-0.1677			-0.0115	0.0058	-0.0063	0.0063	-0.0039	0.0079	0.0039	0.0077	-0.0107	0.0066	-0.0057			2.4153	0.0355	2.4952	0.0269	2.1368	0.0387	2.5313	0.0337	2.0372
	THR-26	-0.7316	0.0266	-0.5556	0.0232	0.4134	0.0179	0.6638	0.0121	0.2712	0.0242	0.01224			0.2532	0.0253	0.2726	0.0282	0.0165	0.0134	-0.0991	0.0108	0.1045	0.0234	0.10954			-0.0001	0.0098	0.0168	0.0113	0.0106	0.0084	-0.0152	0.0076	0.0003	0.0095	0.00248			-0.4774	0.0329	-0.2655	0.0303	0.44	0.0174	0.5498	0.0157	0.3746
	CYS-27	-1.6223	0.0225	-0.8388	0.0221	-0.928	0.018	-0.8812	0.016	-0.9451	0.0202	-1.04308			0.3688	0.0201	0.2162	0.0198	0.2171	0.0226	0.1639	0.0184	0.1398	0.0276	0.22116			0.0361	0.0114	0.036	0.0106	-0.0257	0.011	0.0439	0.0095	0.0246	0.013	0.02298			-1.217	0.0277	-0.5857	0.0302	-0.7361	0.0281	-0.6747	0.0267	-0.7815
	SER-28	-0.3443	0.0275	-0.0668	0.0218	0.1682	0.0232	-0.0223	0.0204	-0.5877	0.0307	-0.17058			0.6479	0.0557	0.3945	0.0553	0.2294	0.0559	0.3999	0.059	0.4807	0.0532	0.43048			0.0106	0.0059	0.0009	0.0067	-0.0045	0.0054	0.0047	0.004	0.0085	0.007	0.00404			0.3159	0.06	0.3273	0.0628	0.3956	0.0632	0.3819	0.0603	-0.1006
	ALA-29	-0.3633	0.0323	0.1154	0.0156	0.3948	0.0132	0.506	0.0147	-0.0843	0.0284	0.11372			0.3002	0.0299	0.3036	0.0315	0.2899	0.0305	0.2479	0.0292	0.2723	0.0298	0.28278			-0.0015	0.008	-0.0019	0.0097	-0.0006	0.0087	0.0085	0.0077	-0.0152	0.0056	-0.00214			-0.0655	0.0427	0.4179	0.0342	0.6832	0.0329	0.7628	0.0326	0.1728
	GLN-30	-1.964	0.0582	0.6319	0.0511	0.685	0.0374	0.4711	0.0305	0.3794	0.0704	0.04068			-0.0278	0.0317	-0.0044	0.046	-0.3511	0.022	-0.1658	0.0199	0.3784	0.0629	-0.03414			0.0057	0.0096	0.0099	0.011	0.0002	0.0082	0.0282	0.0062	0.0153	0.0177	0.01186			-1.9892	0.0576	0.6369	0.0595	0.335	0.0297	0.3339	0.028	0.766
	LYS-31	-32.1544	0.3409	-30.1986	0.3319	-32.2126	0.353	-34.6041	0.5332	-32.9365	0.3852	-32.4212			1.426	0.1324	0.7946	0.1203	1.3561	0.1394	1.4737	0.1645	0.7428	0.146	1.15864			0.0364	0.0126	-0.0074	0.0127	-0.0529	0.0129	-0.0148	0.0119	0.0073	0.0134	-0.00628			-30.7065	0.3478	-29.4101	0.3546	-30.9091	0.3522	-33.1329	0.5188	-32.1703
	LEU-32	-1.8975	0.0196	-1.8507	0.0171	-1.4057	0.0204	-1.818	0.018	-1.8057	0.0172	-1.75552			0.4546	0.0137	0.523	0.0098	0.2102	0.0154	0.4396	0.0122	0.5086	0.0086	0.4272			-0.0323	0.013	-0.0255	0.0126	-0.0001	0.0139	-0.0441	0.0136	-0.0411	0.0155	-0.02862			-1.4754	0.0256	-1.3529	0.0196	-1.1961	0.0243	-1.4231	0.0227	-1.3399
	HIS-33	-7.406	0.1067	-6.0402	0.0917	-6.6647	0.091	-6.0652	0.1082	-5.9607	0.1039	-6.42736			4.0717	0.1098	2.7666	0.0851	2.6917	0.0766	2.4399	0.1002	2.5983	0.097	2.91364			0.0275	0.0121	0.0132	0.0111	0.0052	0.0086	0.0228	0.012	0.0204	0.0123	0.01782			-3.3054	0.0562	-3.2556	0.042	-3.9675	0.0431	-3.5977	0.0527	-3.345
	MET-34	-12.5161	0.2485	-11.037	0.1585	-13.3618	0.1797	-10.6016	0.1994	-12.3578	0.2015	-11.9749			5.9434	0.2009	4.0465	0.0931	4.3799	0.1421	4.2092	0.1426	4.8284	0.1393	4.68148			-0.6734	0.0344	-0.4219	0.0193	-0.978	0.0287	-0.3426	0.0241	-0.8081	0.0342	-0.6448			-7.246	0.2076	-7.4154	0.1197	-9.9613	0.1652	-6.7317	0.1765	-8.3421
	SER-35	-9.2476	0.1136	-9.1357	0.1233	-9.3556	0.1161	-9.3229	0.108	-9.1756	0.1324	-9.24748			5.416	0.0952	5.335	0.0831	4.8854	0.0825	5.1654	0.0956	4.8402	0.0831	5.1284			-0.5132	0.009	-0.4972	0.0088	-0.5336	0.009	-0.5217	0.0088	-0.501	0.0088	-0.51334			-4.3494	0.1136	-4.3005	0.1172	-5.0097	0.1221	-4.6783	0.1194	-4.8355
	PHE-36	1.5667	0.0515	2.2783	0.044	1.6999	0.0413	2.5221	0.0482	2.2804	0.0511	2.06948			-0.8664	0.0439	-1.4325	0.0402	-0.9651	0.0339	-1.3984	0.0388	-1.5424	0.0399	-1.24096			-0.0143	0.0081	0.0019	0.0109	0.03	0.0131	0.0358	0.012	0.0036	0.0081	0.0114			0.6839	0.0299	0.8478	0.0297	0.7654	0.0261	1.161	0.0318	0.7424
	SER-37	-4.7198	0.0988	-11.3228	0.1514	-5.6448	0.0846	-5.5636	0.1173	-5.1733	0.1088	-6.48486			3.6906	0.1168	10.0364	0.117	4.2923	0.0947	4.7773	0.1198	4.4621	0.1471	5.45174			-0.6393	0.0124	-0.8441	0.0163	-0.6707	0.0118	-0.665	0.0128	-0.6411	0.0141	-0.69204			-1.6662	0.1248	-2.1332	0.1582	-2.0238	0.1024	-1.4452	0.1048	-1.3553
	GLU-38	86.9456	1.4098	89.5758	1.4501	92.6552	1.5213	106.334	0.9935	97.6025	1.4342	94.6226			13.5035	2.2607	9.7279	2.5305	5.5721	2.1478	-3.36	1.185	-1.4509	2.064	4.79852			-1.375	0.029	-1.4518	0.0258	-1.3833	0.0279	-1.5205	0.0239	-1.3519	0.027	-1.4165			98.9653	1.0445	97.8998	1.2227	96.736	0.9442	101.408	0.7477	94.7317
	SER-39	-23.4824	0.1326	-23.072	0.1486	-23.0559	0.1274	-22.9554	0.1516	-23.4685	0.1407	-23.2068			19.338	0.1096	19.0121	0.1071	19.5525	0.11	18.9471	0.1202	19.5395	0.1184	19.2778			-1.16	0.0103	-1.1769	0.0099	-1.2368	0.0104	-1.1719	0.0096	-1.1385	0.0101	-1.17682			-5.3001	0.1305	-5.2394	0.1348	-4.734	0.1326	-5.1779	0.1561	-5.0745
	ARG-40	-125.329	1.1166	-102.394	0.7833	-90.7142	0.4735	-134.869	1.9785	-120.686	1.368	-114.799			47.773	0.9667	41.3903	0.5657	35.8112	0.2383	60.8637	1.6133	48.4764	1.1492	46.8629			-0.3865	0.0183	-0.3669	0.016	-0.3655	0.0129	-0.4831	0.0199	-0.4025	0.0207	-0.4009			-77.9568	0.3945	-61.4001	0.4142	-55.2559	0.3291	-74.4523	0.6137	-72.625
	HIS-41	-33.3153	0.6966	-28.5742	0.5819	-29.0265	0.65	-20.9313	0.3927	-22.9861	0.3667	-26.9667			37.3418	0.8226	33.322	0.6541	26.6743	0.5803	24.6589	0.4519	27.5166	0.4269	29.9027			-2.3869	0.0266	-2.2969	0.0272	-1.8667	0.0351	-2.1116	0.028	-2.0999	0.024	-2.1524			1.6444	0.2972	2.4526	0.3068	-4.2085	0.4945	1.6228	0.313	2.4223
	ASN-42	-14.9035	0.1664	-15.1104	0.1655	-13.2922	0.1819	-15.3166	0.1616	-15.6796	0.1435	-14.8605			10.0486	0.1829	10.2072	0.1575	10.7289	0.2075	9.3379	0.1886	10.8705	0.1643	10.2386			-0.4084	0.0129	-0.3801	0.0124	-0.4025	0.0158	-0.4106	0.0126	-0.3737	0.0133	-0.39506			-5.2648	0.1614	-5.2908	0.1705	-2.9654	0.1657	-6.3893	0.1612	-5.1784
	GLU-43	-55.4795	0.7638	-81.8917	0.7866	-42.2048	0.7804	-55.8324	0.6451	-72.4117	0.7418	-61.564			132.713	0.7533	149.032	0.9865	119.029	0.9552	131.744	0.8243	146.445	0.7678	135.793			-2.4301	0.023	-2.7356	0.0196	-2.0613	0.0223	-2.5638	0.0217	-2.567	0.0214	-2.47156			74.795	0.6162	64.3155	0.6433	74.8054	0.4731	73.3594	0.5747	71.4679
	ASN-44	0.0082	0.2548	2.8638	0.2337	-8.1653	0.2371	0.1317	0.2297	-0.2082	0.2737	-1.07396			8.2953	0.4012	0.8845	0.1429	15.3734	0.3197	6.0188	0.2636	3.4792	0.2555	6.81024			-0.5574	0.025	-0.0583	0.011	-0.595	0.0168	-0.6214	0.0223	-0.1859	0.0185	-0.4036			7.7573	0.2972	3.6901	0.2169	6.6116	0.2305	5.531	0.28	3.0848
	CYS-45	-1.1009	0.0792	-0.2785	0.0778	-0.3772	0.0603	0.0307	0.0734	-0.4166	0.0835	-0.4285			0.5013	0.0398	0.3161	0.0425	0.4937	0.0406	0.2637	0.0427	0.2428	0.0418	0.36352			-0.007	0.0102	-0.0013	0.0092	-0.026	0.0116	-0.005	0.0074	-0.0053	0.0084	-0.00892			-0.6109	0.076	0.0389	0.064	0.0928	0.0605	0.2933	0.0723	-0.1761
	LEU-46	0.2049	0.0194	0.2689	0.0194	0.1144	0.0191	0.1964	0.0245	0.4177	0.0163	0.24046			0.1003	0.0094	0.0621	0.0094	0.0935	0.009	0.0683	0.0107	-0.0281	0.0084	0.05922			-0.012	0.0106	-0.0196	0.0112	-0.0009	0.0122	-0.0003	0.0104	0.0081	0.0105	-0.00494			0.2939	0.02	0.3108	0.0205	0.207	0.0221	0.2645	0.021	0.3981
	ILE-47	1.8946	0.0198	1.6832	0.018	1.5045	0.017	1.8607	0.0156	1.7109	0.0156	1.73078			-0.0417	0.0186	-0.0343	0.018	-0.0345	0.0136	-0.0897	0.0117	-0.0946	0.0133	-0.05896			-0.0028	0.0114	-0.0259	0.0149	-0.0316	0.0141	-0.0075	0.0138	-0.0184	0.0133	-0.01724			1.8516	0.0271	1.622	0.0271	1.4384	0.0234	1.7638	0.0222	1.5984
	GLN-48	2.0884	0.082	1.8807	0.0828	1.2554	0.0625	2.327	0.0651	0.9827	0.0727	1.70684			0.4626	0.0674	0.5528	0.0715	0.4872	0.0675	0.3077	0.0674	0.7031	0.0739	0.50268			0.0148	0.0132	0.0354	0.0161	-0.0166	0.0148	0.0441	0.0134	0.0015	0.012	0.01584			2.5649	0.1006	2.4784	0.1088	1.7293	0.0912	2.6787	0.0899	1.6893
	GLU-49	19.9044	0.2836	21.5553	0.2454	23.1447	0.2109	20.4631	0.2393	19.6297	0.2208	20.9394			-0.9456	0.1215	-0.8041	0.1085	-1.2578	0.1039	-0.5331	0.1197	0.506	0.1172	-0.60692			0.0259	0.0132	-0.0282	0.0149	0.005	0.0153	-0.0323	0.0146	-0.0351	0.0163	-0.01294			18.9781	0.2941	20.7282	0.2348	21.9009	0.2086	19.9041	0.2251	20.1081
	GLY-50	-1.3499	0.0247	-1.5177	0.0219	-1.1869	0.0172	-1.4222	0.0192	-1.2827	0.0176	-1.35188			0.3216	0.0096	0.3246	0.0095	0.1356	0.0103	0.3095	0.0098	0.2663	0.0095	0.27152			0.0089	0.0055	-0.0148	0.0081	0.0054	0.0077	0.0067	0.0076	0.0184	0.0079	0.00492			-1.0194	0.0226	-1.207	0.0224	-1.0456	0.0196	-1.1051	0.0181	-0.9974
	ALA-51	1.2076	0.012	1.1991	0.0128	0.87	0.0132	1.0936	0.0133	1.0308	0.0089	1.08022			-0.4451	0.0086	-0.4096	0.0076	-0.1684	0.0081	-0.351	0.0066	-0.3391	0.0061	-0.34264			-0.0012	0.0051	0.0043	0.0067	-0.019	0.0073	0.0049	0.0081	0.0042	0.0056	-0.00136			0.7617	0.0105	0.7934	0.0117	0.6828	0.0128	0.7476	0.0139	0.6955
	LEU-52	-1.7054	0.0261	-1.7821	0.0294	-1.0591	0.0192	-1.4433	0.0304	-1.6059	0.0249	-1.51916			0.7842	0.0191	0.6892	0.018	0.2108	0.0142	0.6011	0.0216	0.675	0.0161	0.59206			0.0386	0.0148	0.0003	0.0152	0.0343	0.0162	0.03	0.0122	0.026	0.0135	0.02584			-0.8828	0.0205	-1.0913	0.0235	-0.8144	0.0199	-0.8135	0.0202	-0.9037
	LEU-53	-0.5229	0.0619	-0.3272	0.0522	0.1588	0.0271	0.1943	0.0312	-0.1636	0.0406	-0.13212			-0.5643	0.0246	-0.3405	0.0177	0.0265	0.0118	-0.101	0.0129	-0.1282	0.0121	-0.2215			-0.0781	0.0099	-0.0138	0.0108	-0.0032	0.0091	0.0174	0.0079	-0.0058	0.0086	-0.0167			-1.1651	0.0484	-0.6839	0.0456	0.1819	0.0236	0.1121	0.0254	-0.2992
	PHE-54	4.6695	0.0663	3.8349	0.0658	3.6986	0.0451	4.645	0.0425	3.6768	0.0438	4.10496			-4.5578	0.0716	-4.8302	0.0706	-3.9381	0.0636	-5.1235	0.047	-3.7946	0.0731	-4.44884			-0.0178	0.0093	-0.0149	0.0104	-0.0178	0.0096	-0.0085	0.0067	-0.0117	0.0106	-0.01414			0.0926	0.0649	-1.0133	0.0832	-0.2549	0.0605	-0.4853	0.0501	-0.131
	CYS-55	-6.8605	0.168	-8.134	0.1479	-5.4631	0.088	-5.9451	0.0782	-4.8368	0.1237	-6.2479			1.2358	0.245	2.2616	0.1104	1.0863	0.0741	1.1207	0.0565	1.2163	0.1448	1.38414			-0.6483	0.0195	-0.7147	0.0256	-0.2857	0.0164	-0.338	0.0149	-0.5014	0.022	-0.49762			-6.2783	0.1797	-6.5871	0.1502	-4.6619	0.099	-5.165	0.094	-4.1097
	GLU-56	83.7995	0.4991	93.8945	0.5834	104.132	0.4268	105.202	0.4485	93.3137	0.4759	96.0683			63.0161	0.8041	64.2667	0.7829	-6.127	0.392	-4.606	0.261	-2.4943	0.2893	22.8111			-1.9963	0.0181	-2.2655	0.0213	-0.1804	0.0118	-0.26	0.0134	-0.1361	0.0123	-0.96766			144.811	0.7532	155.895	0.6554	97.8124	0.4239	100.314	0.4012	90.6804
	GLN-57	-27.0208	0.2583	-26.0888	0.2332	-25.9892	0.3527	-19.3975	0.3101	-30.8202	0.2332	-25.8633			30.3868	0.3242	31.3621	0.2475	29.7921	0.4151	26.0899	0.4351	36.7796	0.3181	30.8821			-2.7842	0.0217	-2.2869	0.0206	-1.9658	0.0234	-1.7641	0.0247	-2.4103	0.0218	-2.24226			0.5819	0.3701	2.9708	0.317	1.8239	0.244	4.9219	0.3325	3.552
	ALA-58	-4.6655	0.1555	-5.2149	0.1188	-5.5096	0.0851	-4.9148	0.1121	-5.2445	0.0875	-5.10986			5.9269	0.1481	5.1821	0.0825	4.2666	0.076	4.3265	0.0989	4.1816	0.0838	4.77674			-0.208	0.0092	-0.2962	0.0116	-0.2328	0.0096	-0.225	0.0106	-0.1961	0.0095	-0.23162			1.0573	0.1087	-0.3312	0.107	-1.4779	0.0981	-0.8088	0.1147	-1.2648
	VAL-59	-5.6251	0.0865	-7.6083	0.1021	-7.1631	0.1057	-7.1643	0.1019	-6.9546	0.0915	-6.90308			1.7155	0.1037	1.9419	0.0994	0.5648	0.0736	0.5826	0.0729	1.5006	0.1052	1.26108			-0.5316	0.02	-0.546	0.0163	-0.7532	0.02	-0.8774	0.0189	-0.7843	0.0197	-0.6985			-4.4395	0.117	-6.2196	0.0903	-7.3557	0.102	-7.4585	0.1012	-6.238
	VAL-60	-0.6787	0.0279	-1.2087	0.0323	-1.1154	0.0306	-0.5963	0.0367	-0.7718	0.0342	-0.87418			0.4757	0.0136	0.5047	0.0152	0.3986	0.0131	0.2286	0.0153	0.275	0.0147	0.37652			-0.0267	0.0121	-0.0465	0.0101	0.008	0.009	-0.0068	0.011	-0.0105	0.0115	-0.0165			-0.2282	0.0294	-0.751	0.0287	-0.7095	0.0289	-0.3747	0.0328	-0.5059
	ALA-61	-1.6292	0.038	-1.9673	0.0355	-2.9731	0.0289	-3.0357	0.0268	-1.8142	0.0374	-2.2839			0.1818	0.0336	0.3349	0.0322	1.0942	0.0255	1.2931	0.0242	0.2408	0.0296	0.62896			-0.044	0.0096	-0.016	0.0083	-0.0017	0.0042	-0.0068	0.005	-0.0217	0.0096	-0.01804			-1.4931	0.0245	-1.6487	0.0209	-1.8791	0.0251	-1.7499	0.0271	-1.5935
	PRO-62	1.148	0.0313	1.3954	0.0216	-0.0766	0.0296	0.0503	0.029	1.542	0.0287	0.81182			-0.4676	0.0411	-0.8832	0.0312	-0.7199	0.0355	-0.8574	0.0365	-0.6976	0.0401	-0.72514			-0.034	0.0141	-0.0312	0.0144	0.0081	0.0083	-0.0101	0.0101	0.0052	0.0135	-0.0124			0.6487	0.0357	0.4799	0.0336	-0.788	0.0334	-0.8164	0.0314	0.8487
	VAL-63	0.8329	0.0286	1.0432	0.0228	0.0328	0.0198	0.2161	0.0204	0.4749	0.0356	0.51998			-0.0279	0.0203	-0.1077	0.0216	0.2168	0.0275	0.0858	0.0253	-0.0962	0.0189	0.01416			0.0322	0.0112	0.0029	0.0115	0.0373	0.0148	0.0717	0.0133	0.0227	0.0171	0.03336			0.8374	0.033	0.9389	0.0309	0.2853	0.03	0.3737	0.0301	0.4029
	SER-64	-0.881	0.0626	-0.2676	0.0558	0.0362	0.0538	0.035	0.0631	-0.6088	0.0586	-0.33724			0.8621	0.0613	0.9021	0.0567	0.7944	0.0573	0.9248	0.0614	0.5624	0.0549	0.80916			-0.0238	0.007	0.016	0.0079	-0.0099	0.0072	0.0033	0.0083	0.0072	0.0109	-0.00144			-0.0397	0.0797	0.6482	0.0745	0.8202	0.0749	0.9602	0.0784	-0.0393
	GLY-65	0.6051	0.0332	0.5407	0.0293	0.63	0.0164	0.5678	0.0237	0.4643	0.0262	0.56158			-0.2056	0.0144	-0.1279	0.0134	-0.0702	0.0086	-0.103	0.0092	-0.0853	0.0156	-0.1184			-0.0104	0.0065	0.0045	0.0053	0.002	0.0038	-0.0008	0.0029	0.0007	0.0052	-0.0008			0.389	0.0326	0.4169	0.029	0.5621	0.0169	0.4647	0.0226	0.38
	ASP-66	50.2394	0.3574	49.0997	0.1854	40.9054	0.3648	45.5042	0.2703	41.4005	0.303	45.4298			-1.8357	0.1307	-1.2361	0.1102	-0.0856	0.1663	-0.5602	0.1329	0.512	0.1475	-0.64112			-0.0263	0.0108	0.0094	0.0129	-0.0053	0.0106	-0.0111	0.0107	0.0045	0.0117	-0.00576			48.3849	0.3233	47.8742	0.1916	40.8369	0.2762	44.9399	0.2336	41.9221
	LEU-67	0.2273	0.0238	-0.0334	0.021	-0.3996	0.0315	-0.2253	0.027	-0.0078	0.0243	-0.08776			-0.0237	0.0144	0.1303	0.0095	0.2892	0.0281	0.2659	0.0198	0.132	0.0198	0.15874			0.0021	0.0169	-0.0413	0.0193	-0.0307	0.0181	0.0112	0.0152	0.0072	0.016	-0.0103			0.2063	0.0248	0.0543	0.026	-0.1421	0.0261	0.0521	0.0234	0.1317
	VAL-68	-0.3054	0.0181	-0.3257	0.0153	-0.1858	0.0202	-0.391	0.0154	-0.1647	0.0177	-0.27452			-0.0639	0.0088	-0.1002	0.0076	-0.1609	0.0139	-0.0688	0.0093	-0.0652	0.0107	-0.0918			-0.0578	0.0115	-0.0171	0.0096	0.0016	0.0099	-0.0282	0.0123	-0.0113	0.0137	-0.02256			-0.4277	0.017	-0.4421	0.0165	-0.3449	0.015	-0.4875	0.0178	-0.2412
	PHE-69	-3.3867	0.074	-3.6993	0.0596	-3.1677	0.0718	-2.8505	0.0847	-2.6252	0.0634	-3.14588			1.2795	0.0379	1.4876	0.0359	1.2236	0.0488	0.9635	0.0491	0.9704	0.0365	1.18492			-0.2136	0.0222	-0.4345	0.0203	-0.4108	0.0224	-0.3074	0.0202	-0.2936	0.0192	-0.33198			-2.3178	0.0618	-2.6461	0.0633	-2.3533	0.0651	-2.195	0.078	-1.9479
	ARG-70	-47.2731	0.2768	-56.7584	0.3012	-47.4279	0.2944	-56.5458	0.4165	-45.6344	0.375	-50.7279			3.8489	0.1091	3.4543	0.1305	1.9153	0.1624	6.4321	0.2939	2.3494	0.1887	3.6			-0.0186	0.0083	0.0032	0.0075	-0.0291	0.0082	-0.0217	0.0077	-0.0119	0.0057	-0.01562			-43.4377	0.2302	-53.3102	0.2333	-45.5406	0.2119	-50.1383	0.2531	-43.2956
	PRO-71	-2.5574	0.0307	-2.9408	0.0595	-1.6028	0.0498	-2.0683	0.078	-2.0411	0.0713	-2.24208			1.1629	0.0312	1.0088	0.028	0.2836	0.0299	0.1254	0.0337	0.0623	0.0345	0.5286			-0.0365	0.0144	-0.0957	0.0153	-0.0932	0.0137	-0.3309	0.0176	-0.1819	0.0174	-0.14764			-1.4309	0.0416	-2.0274	0.071	-1.4102	0.0576	-2.2761	0.085	-2.1627
	LEU-72	1.725	0.0513	0.913	0.0626	0.5605	0.0249	0.2281	0.0319	0.2991	0.0322	0.74514			-1.1063	0.0464	-0.694	0.0281	-0.1713	0.0058	-0.1425	0.0071	-0.0293	0.0116	-0.42868			0.019	0.0132	-0.0193	0.0143	0.0107	0.0145	0.0096	0.0149	-0.0346	0.0112	-0.00292			0.6378	0.038	0.1987	0.0498	0.4009	0.0299	0.0952	0.033	0.2349
	LYS-73	-106.823	1.4064	-132.577	1.0548	-82.5754	0.5994	-90.9114	1.1838	-87.8438	1.2171	-100.146			25.7347	1.5446	33.0834	1.3452	2.3814	0.1865	9.6621	1.3686	10.6267	1.2699	16.2977			-0.1066	0.0159	0.0017	0.0233	0.0049	0.0135	-0.1136	0.0197	-0.1683	0.0223	-0.07638			-81.2068	0.5824	-99.4548	0.6128	-80.1855	0.535	-81.37	0.757	-77.3763
	ILE-74	-4.5927	0.0457	-4.7485	0.0263	-2.657	0.0164	-2.7008	0.0213	-2.7234	0.0307	-3.48448			1.4234	0.0461	1.1989	0.0243	0.0625	0.0079	0.0747	0.0124	0.1589	0.0229	0.58368			0.0168	0.0093	-0.0212	0.0092	-0.0255	0.0107	0.0007	0.009	-0.0086	0.0074	-0.00756			-3.1541	0.0257	-3.5711	0.0215	-2.6195	0.0186	-2.6255	0.0244	-2.5731
	GLU-75	66.029	0.483	80.8104	0.4347	60.6958	0.3907	67.3825	0.4885	55.5003	0.4889	66.0836			-4.6605	0.2574	-5.9464	0.1678	-0.0405	0.1209	-2.5101	0.2712	0.5065	0.1734	-2.5302			0.0037	0.0082	-0.0026	0.013	0.0126	0.0105	0.0032	0.0107	0.0023	0.0073	0.00384			61.3865	0.3409	74.8633	0.3875	60.6827	0.3798	64.8545	0.3892	56.0057
	VAL-76	-2.6825	0.0217	-3.355	0.0214	-2.3478	0.0172	-2.6428	0.0272	-2.5386	0.0265	-2.71334			0.7242	0.0213	0.6035	0.0138	0.2261	0.0128	0.2449	0.0168	0.3103	0.0197	0.4218			-0.0033	0.0159	-0.0442	0.0151	0.0185	0.0151	0.01	0.0174	-0.0211	0.0115	-0.00802			-1.9638	0.0258	-2.796	0.0223	-2.1036	0.024	-2.3898	0.0285	-2.2506
	LEU-77	-3.209	0.0191	-3.6342	0.0175	-2.6602	0.0134	-2.7484	0.0187	-2.7245	0.0198	-2.99526			0.8559	0.0175	0.6858	0.011	0.2701	0.0074	0.2145	0.0096	0.3174	0.0125	0.46874			-0.0307	0.0112	0.0171	0.0113	-0.0309	0.0127	-0.0399	0.011	-0.0342	0.0104	-0.02372			-2.3848	0.0166	-2.9318	0.0165	-2.42	0.0175	-2.5733	0.0189	-2.441
	SER-78	-2.5154	0.0351	-2.7699	0.0447	-2.0965	0.0308	-2.614	0.033	-2.6153	0.0344	-2.52222			0.5374	0.0218	0.3735	0.0194	0.192	0.0176	0.3267	0.0414	0.4967	0.0459	0.38526			-0.0005	0.004	0.0166	0.0054	0.0112	0.0057	0.01	0.0058	-0.0006	0.0062	0.00734			-1.9806	0.0263	-2.3822	0.0416	-1.8923	0.032	-2.2793	0.0481	-2.1165
	LYS-79	-47.689	0.1717	-52.1319	0.252	-46.5856	0.221	-51.2856	0.3177	-45.402	0.2827	-48.6188			4.2977	0.1308	2.0635	0.1216	1.2296	0.1066	2.0795	0.1339	1.1292	0.119	2.1599			0.0235	0.0136	0.0201	0.0139	-0.0111	0.0141	-0.0032	0.0136	-0.0001	0.0118	0.00584			-43.3733	0.1737	-50.0462	0.2478	-45.3708	0.2545	-49.2116	0.2994	-44.2879
	LEU-80	-2.3598	0.0096	-2.6648	0.0113	-2.1519	0.0107	-2.3642	0.0117	-2.1118	0.012	-2.3305			0.6822	0.0147	0.5154	0.0111	0.342	0.0102	0.3694	0.0109	0.3345	0.0091	0.4487			0.0043	0.018	-0.0141	0.0171	0.0004	0.0153	-0.0108	0.0142	0.0067	0.0137	-0.0027			-1.6747	0.0239	-2.1637	0.0207	-1.809	0.0198	-2.0051	0.0186	-1.7708
	LEU-81	-2.6124	0.0104	-2.872	0.0114	-2.4623	0.0096	-2.5596	0.0105	-2.3626	0.011	-2.57378			0.7324	0.0116	0.5587	0.0082	0.4207	0.0086	0.3863	0.0091	0.3964	0.0077	0.4989			-0.007	0.0131	-0.0275	0.0121	0.0173	0.0134	-0.0006	0.0128	0.0013	0.0109	-0.0033			-1.8865	0.0184	-2.3402	0.0148	-2.0236	0.0186	-2.1736	0.0172	-1.9657
	ALA-82	-1.7531	0.0092	-2.05	0.0098	-1.7072	0.0087	-1.8414	0.0098	-1.6222	0.011	-1.79478			0.399	0.0067	0.3025	0.0043	0.2223	0.0046	0.2293	0.0042	0.1734	0.0044	0.2653			-0.0227	0.0119	-0.0399	0.0115	-0.0124	0.0153	-0.0531	0.0114	-0.0041	0.0113	-0.02644			-1.3771	0.0144	-1.787	0.0139	-1.497	0.0172	-1.6653	0.0152	-1.4526
	PHE-83	-1.607	0.0086	-1.9539	0.0102	-1.593	0.0091	-1.7975	0.0102	-1.5551	0.0108	-1.7013			0.3175	0.0078	0.2732	0.0077	0.1988	0.0073	0.2299	0.0063	0.1728	0.0067	0.23844			0.0165	0.0113	0.0046	0.0117	-0.0301	0.0117	-0.0118	0.0118	-0.0321	0.0112	-0.01058			-1.2733	0.0137	-1.6761	0.0164	-1.4243	0.0142	-1.579	0.0158	-1.4153
	ILE-84	-1.8939	0.0111	-2.1892	0.0136	-1.8203	0.0107	-2.0489	0.0107	-1.7604	0.0131	-1.94254			0.4263	0.0083	0.3582	0.0074	0.302	0.0055	0.3652	0.0056	0.2583	0.0066	0.342			-0.0645	0.0181	0.108	0.0193	-0.0049	0.0147	0.0204	0.0181	-0.0422	0.0171	0.00336			-1.532	0.0211	-1.7222	0.0209	-1.5236	0.0166	-1.663	0.0212	-1.5451
	ASP-85	18.3715	0.1765	18.8224	0.2006	15.6499	0.1536	19.3421	0.2119	14.8426	0.1434	17.4057			0.0648	0.1306	1.2374	0.1079	1.6341	0.081	-0.2809	0.0878	2.0979	0.1024	0.95066			-0.0379	0.0105	-0.0215	0.0083	-0.0208	0.007	0.0015	0.0061	-0.0283	0.0091	-0.0214			18.3952	0.1579	20.0422	0.1757	17.2586	0.145	19.0674	0.1762	16.9008
	GLY-86	-0.885	0.0115	-1.148	0.0129	-0.8796	0.011	-1.0815	0.0111	-0.855	0.0152	-0.96982			0.1892	0.0169	0.1456	0.0198	0.0553	0.0169	0.1589	0.0162	0.0668	0.0174	0.12316			0.0145	0.0072	0.002	0.0086	0.0062	0.0061	0.0164	0.0083	0.0117	0.0078	0.01016			-0.6807	0.0198	-1.0004	0.0234	-0.8185	0.0184	-0.9074	0.0204	-0.7769
	ALA-87	-0.8051	0.0122	-1.0253	0.0101	-0.8013	0.011	-0.975	0.0106	-0.7602	0.0136	-0.87338			0.0814	0.0198	0.1085	0.0181	-0.0217	0.0157	0.1018	0.017	0.0047	0.0188	0.05494			0.0124	0.0091	0.0114	0.0095	0.0037	0.0118	0.0098	0.0098	-0.0261	0.0103	0.00224			-0.7103	0.0229	-0.9065	0.0228	-0.8188	0.0208	-0.8628	0.022	-0.7839
	GLY-88	-1.0937	0.0177	-1.6916	0.0212	-1.0474	0.0185	-1.4721	0.0197	-1.0992	0.0182	-1.2808			0.4273	0.0124	0.5515	0.0177	0.4116	0.0119	0.4623	0.0114	0.4196	0.0146	0.45446			-0.0073	0.0059	-0.0086	0.0045	-0.006	0.0051	-0.0024	0.0035	-0.0165	0.0058	-0.00816			-0.6737	0.0164	-1.15	0.0159	-0.6416	0.0158	-1.0132	0.0163	-0.696
	LEU-89	-1.0696	0.0164	-0.9512	0.0151	-1.0543	0.0138	-0.9723	0.0159	-0.9677	0.0162	-1.00302			0.2828	0.0344	0.1546	0.027	0.1326	0.0305	0.112	0.0279	0.1932	0.0305	0.17504			-0.0133	0.0111	0.022	0.0117	0.0132	0.0107	-0.0113	0.0109	0.0086	0.0095	0.00384			-0.8031	0.0364	-0.7763	0.0327	-0.907	0.0342	-0.8729	0.0325	-0.7678
	VAL-90	0.3363	0.0215	0.1943	0.033	0.2657	0.0245	0.6302	0.0235	0.1735	0.0296	0.32			-0.1963	0.0226	0.027	0.0242	-0.23	0.0226	-0.3056	0.0221	-0.1137	0.028	-0.16372			-0.0041	0.0158	-0.0336	0.0129	0.0281	0.0141	-0.0166	0.0134	0.0254	0.0153	-0.00016			0.1353	0.0294	0.1882	0.0245	0.0629	0.0234	0.3072	0.024	0.0846
	ASP-91	-31.2814	0.5343	-25.8333	0.4124	-35.5664	0.4019	-29.3961	0.5638	-35.0134	0.5219	-31.4181			19.1052	0.3608	12.5002	0.338	20.8564	0.3192	15.7559	0.4192	20.3533	0.3664	17.7142			-0.0132	0.0059	-0.0049	0.0056	-0.0022	0.0054	-0.0011	0.0039	-0.0038	0.0053	-0.00504			-12.1922	0.3193	-13.3423	0.2799	-14.7155	0.2405	-13.6376	0.2673	-14.6821
	THR-92	-5.2241	0.1603	-4.8871	0.1889	-6.5383	0.162	-5.0519	0.1664	-6.4662	0.1716	-5.63352			3.8242	0.139	3.3052	0.1746	5.6048	0.1471	3.2464	0.1487	5.2096	0.1502	4.23804			-0.0027	0.0125	-0.0289	0.0141	-0.055	0.0133	0.0303	0.0152	-0.0502	0.0112	-0.0213			-1.4052	0.0848	-1.6187	0.1335	-0.9955	0.1074	-1.7749	0.0914	-1.3148
	THR-93	-13.2554	0.1738	-11.4569	0.2344	-13.556	0.1759	-13.2961	0.242	-13.9073	0.1471	-13.0943			12.1314	0.2467	9.0267	0.2992	10.8155	0.2077	12.1414	0.3463	11.911	0.1847	11.2052			-0.679	0.015	-0.4355	0.0169	-0.6825	0.014	-0.5446	0.0197	-0.7038	0.0132	-0.60908			-1.8032	0.1497	-2.8679	0.1401	-3.4239	0.1247	-1.6888	0.1387	-2.7016
	TYR-94	-21.8496	0.3557	-17.0473	0.4763	-19.8972	0.3241	-15.9198	0.5207	-19.8551	0.3577	-18.9138			22.4074	0.428	15.9737	0.5088	19.7001	0.365	15.7848	0.5652	20.0602	0.42	18.7852			-1.1075	0.019	-0.9545	0.0263	-1.0828	0.0198	-0.8881	0.0243	-1.0586	0.0176	-1.0183			-0.5461	0.1747	-2.0258	0.1653	-1.2799	0.1868	-1.0084	0.145	-0.8451
	ALA-95	-5.4599	0.1888	-6.9613	0.2498	-6.8124	0.2003	-4.5107	0.1905	-6.6089	0.1793	-6.07064			1.5224	0.2018	2.5177	0.2193	3.7002	0.1722	0.7043	0.2025	3.7967	0.1742	2.44826			-0.3193	0.0137	-0.3164	0.0145	-0.2972	0.0142	-0.2705	0.0149	-0.3077	0.0129	-0.30222			-4.251	0.0676	-4.756	0.0916	-3.4081	0.0963	-4.0817	0.076	-3.132
	GLU-96	-121.065	0.7844	-115.567	0.5979	-120.449	0.6341	-113.017	0.7259	-115.033	0.6035	-117.026			139.955	0.8664	126.128	0.6683	149.187	0.8459	132.843	0.9945	129.992	0.7966	135.621			-2.6225	0.0175	-2.5631	0.0173	-2.5108	0.0145	-2.4939	0.0169	-2.5094	0.0148	-2.53994			16.3114	0.6493	7.997	0.4723	26.2269	0.5311	17.3449	0.5678	12.4303
	SER-97	-17.1931	0.2234	-19.0156	0.2459	-7.9022	0.3367	-9.4254	0.2139	-9.5802	0.284	-12.6233			20.2874	0.2217	20.8959	0.1606	16.7232	0.2575	16.5232	0.2011	17.8988	0.216	18.4657			-1.3743	0.017	-1.364	0.0195	-1.2602	0.0184	-1.5015	0.0179	-1.3252	0.0196	-1.36504			1.7102	0.2385	0.5246	0.2186	7.5582	0.2727	5.5897	0.1925	6.9855
	ASP-98	-71.1879	0.5918	-68.0064	0.4697	-43.0024	1.0497	-64.8071	0.7035	-72.2084	0.5907	-63.8424			104.556	0.715	103.468	0.6538	71.9157	1.385	102.151	0.7869	101.752	0.6484	96.7686			-1.1333	0.0143	-0.9966	0.012	-0.9734	0.0154	-0.9515	0.0154	-1.0633	0.0142	-1.02362			32.2165	0.6109	34.4616	0.6258	27.9064	0.5421	36.4193	0.5125	28.488
	LYS-99	-124.365	0.7735	-123.982	0.6636	-122.753	0.7148	-119.24	0.6315	-109.709	0.8072	-120.01			106.293	1.0741	102.894	1.2549	101.346	1.4889	90.3798	1.0021	91.9845	1.4474	98.5795			-1.0484	0.0207	-1.3945	0.0218	-1.3767	0.0192	-1.3024	0.0166	-1.3111	0.0206	-1.28662			-19.132	0.9975	-22.5547	0.8639	-22.8451	1.0375	-30.184	0.6606	-19.0402
	TRP-100	-26.224	0.2444	-31.0761	0.3024	-22.0812	0.2114	-26.8224	0.2328	-31.0976	0.2827	-27.4603			10.1308	0.1872	13.1139	0.1905	6.3448	0.1206	11.5869	0.1929	12.5688	0.1822	10.749			-1.7535	0.0211	-1.8321	0.0217	-1.4876	0.023	-1.5934	0.0239	-1.7088	0.0218	-1.67508			-17.8338	0.1378	-19.8037	0.1692	-17.2326	0.1568	-16.8359	0.1401	-20.2286
	VAL-101	0.2655	0.0174	0.4336	0.0184	0.1696	0.016	0.3311	0.0163	0.3538	0.0144	0.31072			-0.1292	0.0117	-0.2475	0.0116	-0.0474	0.0098	-0.1715	0.0129	-0.2367	0.012	-0.16646			0.0235	0.0078	0.0096	0.0091	0.0095	0.0084	0.0333	0.0106	0.0036	0.0094	0.0159			0.1608	0.0148	0.1952	0.0165	0.1312	0.0148	0.1933	0.017	0.1213
	LEU-102	-0.7756	0.0262	-0.6027	0.0249	-1.1788	0.0279	-0.9018	0.0406	-0.8426	0.0277	-0.8603			-0.0805	0.0351	-0.2285	0.0316	0.2607	0.0261	-0.2152	0.0269	-0.2131	0.031	-0.09532			-0.0328	0.0195	-0.082	0.0144	-0.0652	0.0183	-0.0431	0.0152	-0.0495	0.0179	-0.05452			-0.8866	0.0435	-0.9124	0.0392	-0.9834	0.0365	-1.1585	0.0531	-1.1042
	LEU-103	-0.3197	0.0329	-0.3769	0.0348	-0.6018	0.0351	-0.4126	0.0388	-0.4055	0.0356	-0.4233			0.0356	0.0098	0.0475	0.0104	0.0079	0.0126	0.0417	0.0102	-0.0191	0.0137	0.02272			0.0305	0.0112	-0.0119	0.0126	0.0095	0.0129	-0.0106	0.0097	-0.0269	0.014	-0.00188			-0.2501	0.0288	-0.3397	0.0329	-0.5839	0.035	-0.3812	0.0375	-0.4504
	SER-104	0.695	0.0355	0.7654	0.0306	0.9447	0.0382	0.9713	0.0445	1.0287	0.0464	0.88102			0.1692	0.0431	0.1993	0.0435	0.1021	0.0501	0.1124	0.0467	0.1791	0.0462	0.15242			0.004	0.0059	0.0145	0.0073	0.0038	0.0075	0.003	0.007	-0.0091	0.0076	0.00324			0.8677	0.0568	0.9816	0.0487	1.0528	0.059	1.0878	0.0617	1.2
	PRO-105	-0.7121	0.0079	-0.6812	0.0067	-0.6951	0.0078	-0.7401	0.0076	-0.5494	0.0136	-0.67558			0.3054	0.0239	0.2901	0.025	0.1524	0.0123	0.0996	0.0105	0.1196	0.0179	0.19342			-0.0051	0.0108	0.0235	0.0141	-0.0182	0.0111	0.003	0.0111	-0.0003	0.0115	0.00058			-0.4122	0.0272	-0.3689	0.0273	-0.5612	0.0177	-0.6371	0.0173	-0.4296
	GLU-106	34.1261	0.2189	38.9209	0.1762	32.055	0.1986	35.8236	0.2174	31.5128	0.2084	34.4877			-1.4013	0.0871	-1.4272	0.0817	-0.2712	0.087	-1.3507	0.1025	0.0594	0.0963	-0.8782			0.0193	0.0103	0.0245	0.013	-0.0018	0.0077	-0.0053	0.0092	0.0101	0.01	0.00936			32.7584	0.2078	37.509	0.1481	31.7762	0.1577	34.4657	0.1733	31.5802
	PHE-107	0.6354	0.0086	0.6986	0.011	0.0844	0.0134	0.2136	0.014	0.1065	0.0178	0.3477			0.0881	0.0216	0.0119	0.0177	0.1296	0.0196	0.1749	0.0207	0.1987	0.022	0.12064			0.0007	0.0119	0.0216	0.0128	-0.0033	0.0112	0.0299	0.0117	-0.0001	0.0082	0.00976			0.726	0.0247	0.7317	0.0255	0.2126	0.0265	0.4176	0.0265	0.3043
	ARG-108	-24.6979	0.2088	-25.8706	0.1527	-18.7486	0.1318	-20.5224	0.1942	-18.4016	0.1576	-21.6482			0.8904	0.0783	0.7454	0.0751	0.202	0.0689	0.5899	0.0716	0.3045	0.0614	0.54644			-0.005	0.0076	-0.004	0.0071	0.0126	0.012	0.0069	0.0098	-0.0084	0.0109	0.00042			-23.822	0.2124	-25.1295	0.1668	-18.5309	0.1437	-19.9263	0.2095	-18.1128
	ALA-109	0.126	0.0129	0.2752	0.0149	0.0685	0.0104	0.1175	0.0133	0.1086	0.0123	0.13916			-0.0206	0.0252	0.0224	0.0184	0.058	0.0173	0.0698	0.0135	0.017	0.0193	0.02932			0.0058	0.0056	0.0149	0.0051	0.0125	0.0106	0.0023	0.0092	0.0131	0.009	0.00972			0.1112	0.0321	0.3123	0.0261	0.1398	0.0211	0.1895	0.0197	0.1392
	ILE-110	-0.1181	0.0139	-0.1434	0.013	0.5618	0.0065	0.7475	0.0101	0.58	0.0099	0.32556			0.1858	0.0278	0.145	0.0338	-0.047	0.0056	-0.1277	0.0071	-0.0479	0.0089	0.02164			-0.0135	0.0114	-0.0082	0.0131	-0.0088	0.0185	-0.0198	0.0191	0.0005	0.0169	-0.00996			0.0525	0.033	-0.0073	0.0392	0.5057	0.0213	0.6	0.0212	0.5334
	TRP-111	0.3585	0.0161	0.6995	0.0153	0.3377	0.0175	0.6342	0.0276	-0.0353	0.0304	0.39892			0.2325	0.0431	0.2813	0.039	0.2067	0.0307	0.1677	0.0309	0.5921	0.0445	0.29606			-0.0194	0.0131	0.0015	0.0133	0.0014	0.0074	0.0052	0.0065	0.0138	0.0105	0.0005			0.5708	0.0494	0.981	0.0414	0.5448	0.0374	0.8064	0.038	0.5729
	GLN-112	-0.0518	0.0222	-0.4511	0.0259	-0.6297	0.0325	-0.9368	0.0369	-0.9161	0.0347	-0.5971			-0.1789	0.0439	-0.1071	0.0478	0.0184	0.047	0.0067	0.0398	0.1342	0.0374	-0.02534			-0.0457	0.0123	0.0062	0.0099	-0.0023	0.0089	-0.0287	0.0084	-0.0028	0.007	-0.01466			-0.2763	0.0483	-0.5527	0.0525	-0.6135	0.0532	-0.9588	0.0477	-0.783
	ASP-113	39.9656	0.2227	52.7943	0.3029	46.5173	0.3195	58.1214	0.4522	50.4611	0.5209	49.5719			-0.244	0.1042	-1.1085	0.1339	-1.3932	0.1722	-6.4236	0.3311	-3.1735	0.2706	-2.46856			0.0095	0.005	-0.0024	0.0044	-0.0064	0.0051	-0.0003	0.0046	0.0038	0.0053	0.00084			39.7395	0.2156	51.6753	0.2617	45.1123	0.2757	51.7186	0.3465	47.2851
	ARG-114	-47.8995	0.7053	-73.7512	0.9245	-49.8472	1.3204	-80.6143	1.7497	-57.8804	1.2333	-61.9985			0.8109	0.3441	10.2566	0.9825	2.6496	1.122	26.6946	1.5903	9.4125	1.136	9.96484			-0.0068	0.0105	-0.1717	0.0251	-0.2816	0.0257	-0.8969	0.0361	-0.2951	0.0336	-0.33042			-47.0746	0.4748	-63.6355	0.4633	-47.5067	0.6005	-54.7911	0.6048	-48.7762
	LYS-115	-46.2391	0.5671	-82.1462	1.2927	-78.7152	1.3789	-104.71	1.8986	-97.3155	1.8869	-81.8253			0.3227	0.2666	14.6906	1.5493	23.6437	2.0553	48.1108	2.7274	46.9874	2.5676	26.751			0.0003	0.0086	-0.158	0.0185	-0.2556	0.0259	-0.4819	0.0295	-0.4642	0.0285	-0.27188			-45.9357	0.5389	-67.5565	0.7916	-55.3036	0.9719	-57.0114	1.1409	-50.8222
	ARG-116	-38.8037	0.1758	-48.0409	0.3074	-43.2364	0.2461	-50.1392	0.4041	-46.2835	0.5401	-45.3007			1.0036	0.0684	0.9962	0.0663	0.9035	0.0787	2.2774	0.1348	1.9694	0.1347	1.43002			0.0054	0.0069	-0.0001	0.0063	0.0066	0.0085	0.008	0.0072	0.0163	0.0081	0.00724			-37.8	0.1933	-47.0475	0.3027	-42.3321	0.2371	-47.8446	0.3509	-44.3027
	CYS-117	-0.4187	0.0319	-0.5857	0.0349	-0.478	0.0325	-0.6639	0.0427	-0.8088	0.0242	-0.59102			0.0417	0.0265	0.0145	0.0236	0.0276	0.0136	-0.0049	0.0219	0.1327	0.0141	0.04232			-0.0073	0.0069	-0.0129	0.0092	0.0064	0.007	0.0081	0.0073	-0.0196	0.0072	-0.00506			-0.3856	0.0329	-0.583	0.0412	-0.4428	0.0315	-0.66	0.0343	-0.6966
	GLU-118	38.8369	0.1548	45.8946	0.2138	39.4213	0.1735	45.3755	0.2775	40.0101	0.2444	41.9077			-0.9684	0.0999	-0.191	0.1095	-0.272	0.1145	-2.1891	0.1265	-0.3447	0.1309	-0.79304			0.0178	0.0114	0.0301	0.0104	-0.01	0.0138	0.0053	0.0109	-0.0164	0.0117	0.00536			37.8923	0.1657	45.7289	0.2158	39.1286	0.1781	43.1911	0.2485	39.6474
	TYR-119	-1.2579	0.0131	-1.7137	0.0174	-1.3102	0.016	-1.7801	0.0188	-1.5939	0.0212	-1.53116			0.1504	0.0283	0.1907	0.0238	0.3151	0.0265	0.3312	0.025	0.4228	0.027	0.28204			-0.0057	0.0084	0.0037	0.0074	-0.0331	0.0103	-0.0219	0.0106	-0.0008	0.0094	-0.01156			-1.1119	0.0299	-1.5189	0.0295	-1.0286	0.0316	-1.4717	0.033	-1.1718
	TRP-120	-1.1054	0.016	-1.1182	0.0232	-1.2053	0.0165	-1.3952	0.0201	-1.1954	0.0185	-1.2039			0.166	0.0088	0.1743	0.0094	0.1576	0.0068	0.1607	0.0072	0.1966	0.0099	0.17104			0.0004	0.0058	0.0036	0.0063	0.003	0.0092	-0.0342	0.0095	-0.0087	0.006	-0.00718			-0.9393	0.0158	-0.9406	0.0224	-1.0441	0.0193	-1.269	0.0192	-1.0081
	PHE-121	-1.5895	0.0158	-1.9663	0.0187	-1.6971	0.0146	-1.7632	0.0227	-1.8854	0.0148	-1.7803			0.2392	0.0069	0.2265	0.0077	0.2077	0.007	0.3111	0.0097	0.2899	0.0075	0.25488			-0.0016	0.0076	-0.0084	0.0081	-0.0029	0.0081	-0.0265	0.0106	0	0.0059	-0.00788			-1.3513	0.0151	-1.7477	0.0181	-1.4917	0.0164	-1.4787	0.023	-1.5955
	LEU-122	-1.3036	0.0103	-1.5416	0.0102	-1.4098	0.0089	-1.6114	0.0093	-1.5559	0.0089	-1.48446			0.2173	0.0056	0.1864	0.0066	0.2415	0.0072	0.2849	0.0074	0.3118	0.0063	0.24838			-0.0359	0.0173	-0.0229	0.0161	0.0113	0.017	-0.0536	0.0185	-0.0493	0.0159	-0.03008			-1.1224	0.018	-1.3781	0.0203	-1.1568	0.0184	-1.3811	0.0213	-1.2936
	GLN-123	-1.9269	0.0433	-2.3345	0.0595	-0.1944	0.0115	-0.2016	0.0125	-0.3169	0.0182	-0.99486			0.264	0.0188	0.3026	0.0267	0.3135	0.0377	0.2687	0.042	0.435	0.0429	0.31676			0.0053	0.0114	0.0247	0.0134	0.0395	0.0119	0.027	0.0114	-0.0209	0.0124	0.01512			-1.6582	0.0433	-2.0056	0.0622	0.1585	0.0426	0.0913	0.0429	0.0977
	GLN-124	-2.5931	0.0345	-2.7271	0.0418	-2.1184	0.0287	-2.923	0.0325	-2.6309	0.0289	-2.5985			0.3595	0.0192	0.3036	0.0227	0.1643	0.021	0.4419	0.0237	0.4704	0.0259	0.34794			-0.0177	0.0078	-0.0304	0.0068	0.0038	0.0095	-0.0099	0.008	-0.0106	0.0081	-0.01296			-2.2499	0.0325	-2.4532	0.0377	-1.9504	0.032	-2.4896	0.0324	-2.1703
	ILE-125	-2.1464	0.0159	-2.2045	0.016	-2.1538	0.0142	-2.4028	0.0138	-2.2733	0.0132	-2.23616			0.5301	0.0192	0.465	0.015	0.4974	0.0175	0.5045	0.0232	0.5095	0.0169	0.5013			0.0249	0.0174	-0.0226	0.0176	0.0754	0.014	0.0028	0.0169	0.0183	0.0165	0.01976			-1.5907	0.0271	-1.7611	0.0248	-1.5809	0.0206	-1.894	0.0301	-1.7449
	ILE-126	-1.3151	0.015	-1.075	0.0266	-0.1127	0.0131	-0.2072	0.0096	-0.0396	0.0085	-0.54992			0.2549	0.0131	0.1809	0.0167	-0.1046	0.0121	-0.0643	0.0096	-0.1195	0.0122	0.02948			0.0145	0.0199	-0.0358	0.0201	0.0468	0.0208	-0.0109	0.021	0.0145	0.0192	0.00582			-1.0467	0.0272	-0.9303	0.0325	-0.1709	0.0275	-0.2823	0.0244	-0.1438
	THR-127	-0.9735	0.0463	-0.4071	0.0425	-1.1835	0.0249	-1.2746	0.0238	-1.1988	0.0241	-1.0075			0.6833	0.0324	0.5118	0.0376	0.6443	0.0423	0.6519	0.0376	0.7399	0.0424	0.64624			-0.0039	0.0106	0.0072	0.009	0.0078	0.0101	0.0162	0.0107	0.0092	0.0091	0.0073			-0.2935	0.0396	0.1103	0.0461	-0.5307	0.0459	-0.605	0.0399	-0.451
	PRO-128	0.2622	0.0394	-0.6341	0.0726	0.3393	0.0378	0.2087	0.0505	0.3482	0.0402	0.10486			-0.3105	0.027	0.0256	0.0392	-0.3986	0.0253	-0.3547	0.0246	-0.3686	0.0284	-0.28136			0.0133	0.0083	0.0148	0.0111	0.0188	0.0087	0.0035	0.0094	0.0113	0.0133	0.01234			-0.0339	0.0395	-0.5954	0.0551	-0.0417	0.0451	-0.1447	0.0468	-0.0104
	SER-129	-0.1346	0.0664	-1.3338	0.0631	-0.0384	0.0722	0.1641	0.0815	0.4933	0.0928	-0.16988			0.3783	0.0507	0.9454	0.0379	0.3114	0.0487	0.3629	0.0474	0.1394	0.0571	0.42748			-0.035	0.0081	0.0009	0.005	0	0.0114	0.005	0.0097	-0.0179	0.0085	-0.0094			0.2061	0.0493	-0.3882	0.0433	0.2745	0.0611	0.534	0.0665	0.6186
	PRO-130	-2.8161	0.054	-2.3832	0.0564	-3.284	0.0585	-2.6352	0.0647	-3.1432	0.0555	-2.85234			0.7707	0.0337	0.8726	0.0289	0.924	0.0279	0.5584	0.0363	0.7988	0.0309	0.7849			-0.2462	0.0152	-0.123	0.0125	-0.2795	0.0134	-0.4255	0.0169	-0.2861	0.0147	-0.27206			-2.2944	0.0587	-1.6331	0.0583	-2.6404	0.0561	-2.5024	0.0589	-2.6314
	ALA-131	0.524	0.0479	0.3508	0.0404	0.2904	0.0386	0.9611	0.0511	0.2408	0.0415	0.47342			0.1465	0.0301	0.344	0.0262	0.2965	0.0275	-0.0466	0.0308	0.3176	0.0313	0.2116			0.0197	0.0072	-0.0034	0.0059	-0.0061	0.009	-0.0085	0.0076	-0.0002	0.007	0.0003			0.6894	0.0351	0.6908	0.0342	0.5804	0.0328	0.9072	0.0351	0.5572
	PHE-132	1.4116	0.0354	1.1384	0.0331	1.3204	0.0368	1.9167	0.0347	1.1795	0.0366	1.39332			-0.5301	0.0235	-0.2888	0.0192	-0.4157	0.0214	-0.8504	0.0217	-0.3386	0.0239	-0.48472			0.0178	0.0098	-0.0115	0.0127	0.0147	0.0101	-0.0204	0.0113	-0.0032	0.0072	-0.00052			0.899	0.0265	0.8386	0.0251	0.9199	0.0246	1.0464	0.0251	0.8369
	ASN-133	3.1658	0.1162	-4.9257	0.1583	2.5403	0.0964	2.4822	0.1376	2.131	0.0977	1.07872			-1.5403	0.1026	3.1902	0.1097	-1.0506	0.0799	-1.2076	0.1178	-0.6996	0.083	-0.26158			-0.0223	0.0147	-0.0188	0.0086	-0.0234	0.0137	-0.007	0.0143	-0.0141	0.0129	-0.01712			1.613	0.0641	-1.7483	0.0698	1.464	0.0653	1.269	0.0672	1.4159
	LYS-134	38.6752	0.5804	35.711	0.482	23.967	0.6578	41.9448	0.522	38.1693	0.5477	35.6935			-33.7824	0.596	-30.3372	0.5813	-15.9477	0.6129	-38.6045	0.5335	-30.0122	0.5282	-29.7368			-0.1896	0.0163	-0.2185	0.0132	-0.2807	0.0128	-0.1665	0.0123	-0.1616	0.0134	-0.20338			4.6831	0.5566	5.1362	0.5501	7.72	0.5849	3.2015	0.4436	8.0085
	VAL-135	2.0241	0.0316	1.8668	0.0303	1.8909	0.0263	2.5507	0.0276	1.6354	0.0273	1.99358			-1.1815	0.0265	-0.8728	0.0237	-1.0685	0.0189	-1.6333	0.0204	-0.9805	0.0206	-1.14732			-0.0749	0.0174	0.0847	0.0186	-0.0059	0.0134	0.0305	0.0191	-0.021	0.0158	0.00268			0.7679	0.0317	1.08	0.0332	0.8167	0.028	0.9466	0.0316	0.6335
	LEU-136	2.0776	0.0304	2.012	0.0338	2.1094	0.0345	2.4756	0.0313	1.7318	0.0317	2.08128			-1.316	0.0264	-0.9882	0.0243	-1.3172	0.0184	-1.4988	0.0191	-1.1304	0.0212	-1.25012			0.0134	0.0163	0.0229	0.0134	0.0131	0.013	0.004	0.0116	-0.0482	0.0148	0.00104			0.7763	0.0244	1.0483	0.0292	0.8066	0.0303	0.9803	0.026	0.5543
	ALA-137	0.4179	0.072	0.3993	0.0566	0.9718	0.0448	1.2518	0.0403	0.444	0.0688	0.69696			-1.1635	0.0752	-0.6508	0.0494	-1.673	0.033	-1.5477	0.0473	-1.1427	0.0555	-1.23554			0.0323	0.0136	-0.0115	0.0127	0.0006	0.0106	0.0055	0.0116	0.0119	0.0106	0.00776			-0.7158	0.0414	-0.2642	0.0364	-0.7007	0.0436	-0.2938	0.0455	-0.6904
	LEU-138	0.0061	0.0837	0.3401	0.0824	0.9118	0.0542	0.5275	0.0847	0.1883	0.0832	0.39476			-1.6827	0.049	-1.7408	0.052	-2.4071	0.0352	-2.853	0.0415	-1.867	0.0586	-2.11012			-0.0101	0.0189	-0.0644	0.0153	-0.015	0.0152	-0.0227	0.0133	-0.0804	0.0166	-0.03852			-1.689	0.0681	-1.465	0.0856	-1.5076	0.0582	-2.3458	0.0769	-1.7575
	LEU-139	1.8523	0.0318	2.0256	0.0336	1.827	0.0321	1.7053	0.0281	1.6022	0.0287	1.80248			-1.154	0.0222	-0.9546	0.021	-1.0279	0.0186	-1.0582	0.0195	-0.9268	0.0213	-1.0243			0.0147	0.0128	0.0179	0.013	0.0206	0.0136	0.0191	0.0143	-0.0184	0.0146	0.01078			0.7138	0.0247	1.0901	0.0301	0.8187	0.0272	0.6676	0.0303	0.6583
	ARG-140	-7.4032	0.3497	-2.8395	0.3259	-4.9803	0.2289	-9.7711	0.2556	1.3427	0.3769	-4.73028			-1.523	0.2038	-3.3976	0.1481	-3.2361	0.1163	-0.1316	0.1127	-4.016	0.1709	-2.46086			0.0005	0.013	0.0112	0.014	-0.0106	0.0129	-0.0043	0.0124	0.0021	0.0111	-0.00022			-8.9264	0.2268	-6.2182	0.2604	-8.2244	0.1815	-9.9029	0.1927	-2.6481
	LYS-141	35.5548	0.8906	47.7715	0.6482	46.8491	0.5109	25.2971	0.7077	45.9054	0.6444	40.2756			-11.0951	1.5529	-38.6091	0.7937	-44.7022	0.8173	4.145	0.851	-33.85	1.0066	-24.8223			-0.6464	0.02	-0.4304	0.016	-0.4447	0.0174	-0.6102	0.0165	-0.5687	0.0187	-0.54008			23.7273	0.9566	8.7306	0.5258	1.7245	0.6589	28.8456	0.6719	11.5023
	SER-142	0.0757	0.1134	-0.0068	0.0933	0.0237	0.052	-0.494	0.0666	0.3729	0.0463	-0.0057			0.0614	0.0954	0.0495	0.0621	-0.0819	0.0339	-0.1045	0.086	-0.2706	0.0406	-0.06922			-0.0907	0.0109	-0.0047	0.0066	0.0004	0.0044	0.0065	0.0038	-0.0052	0.0046	-0.01874			0.044	0.072	0.0379	0.0609	-0.0572	0.0342	-0.592	0.0623	0.0986
	GLU-143	30.0029	0.5983	42.6066	0.6117	26.8125	0.5566	28.7828	0.4687	22.0281	0.6334	30.0466			-2.7384	0.7646	-3.9879	0.3843	1.4279	0.372	-0.078	0.3322	4.6647	0.6535	-0.14234			-0.0692	0.0111	-0.0383	0.0126	-0.0186	0.0092	-0.0154	0.0073	-0.0503	0.0126	-0.03836			27.1845	0.4308	38.5884	0.3917	28.2244	0.3797	28.6969	0.3761	26.6315
	SER-144	-0.4779	0.1454	-2.6264	0.0476	-1.9932	0.0329	-1.9862	0.049	-1.6342	0.0357	-1.74358			0.6816	0.0701	1.0076	0.023	0.8484	0.0211	1.0158	0.0202	0.7905	0.023	0.86878			-0.0003	0.0087	-0.0109	0.0128	0.0045	0.0104	0.0249	0.0092	0.0023	0.0085	0.0041			0.1969	0.0797	-1.6272	0.041	-1.1407	0.0276	-0.9472	0.0451	-0.8402
	TYR-145	-0.177	0.058	-1.3865	0.0365	-0.8503	0.0344	-1.0399	0.0319	-0.6493	0.0338	-0.8206			0.6312	0.047	0.6312	0.0358	0.4289	0.0324	0.7512	0.0287	0.3903	0.0302	0.56656			-0.027	0.0126	0.0012	0.0103	-0.0116	0.01	-0.0102	0.0094	0.0114	0.0105	-0.00724			0.4262	0.0494	-0.7552	0.0482	-0.4339	0.0388	-0.2978	0.0383	-0.2496
	TRP-146	-0.9221	0.037	-0.1555	0.042	-0.1901	0.0272	-0.4672	0.0257	-0.5425	0.0332	-0.45548			0.2911	0.0195	-0.1847	0.0188	-0.094	0.0137	0.0361	0.0126	-0.0507	0.0162	-0.00044			-0.0039	0.0111	0.0259	0.015	-0.0299	0.0113	0.0264	0.0095	-0.0017	0.0113	0.00336			-0.6353	0.0328	-0.3138	0.0386	-0.3146	0.0271	-0.4031	0.0234	-0.5965
	LEU-147	-0.5224	0.0243	-0.9257	0.0194	-0.6267	0.015	-0.6893	0.0149	-0.3805	0.0156	-0.62892			0.5669	0.0202	0.2955	0.0102	0.2241	0.0085	0.3386	0.0077	0.1637	0.0104	0.31776			-0.0103	0.0133	-0.0417	0.0145	-0.0007	0.0136	-0.0396	0.0095	-0.0161	0.0112	-0.02168			0.0341	0.0226	-0.6716	0.0213	-0.4038	0.0183	-0.39	0.0155	-0.2322
	VAL-148	-0.115	0.021	-0.3728	0.0169	-0.2265	0.0148	-0.2815	0.0141	-0.1727	0.0143	-0.2337			0.3722	0.0165	0.1979	0.0111	0.0922	0.0069	0.2304	0.0071	0.0868	0.0096	0.1959			-0.0265	0.0152	-0.0399	0.0168	-0.0096	0.0147	-0.0182	0.017	-0.0117	0.0106	-0.02118			0.2312	0.0228	-0.215	0.0224	-0.1457	0.0193	-0.0687	0.0235	-0.0983
	GLY-149	-0.219	0.016	-0.3919	0.0165	-0.2342	0.0131	-0.2303	0.0128	-0.2099	0.0125	-0.25706			0.2994	0.02	0.16	0.0168	0.0536	0.0121	0.2372	0.0156	-0.0019	0.0098	0.14966			-0.0149	0.0055	0.0013	0.0053	-0.0092	0.0062	0.0013	0.0073	0.0028	0.0043	-0.00374			0.0662	0.021	-0.2293	0.022	-0.1889	0.017	0.0077	0.0208	-0.2093
	TYR-150	-1.4527	0.0276	-1.2595	0.0291	-0.7023	0.0181	-0.8003	0.0211	-0.7886	0.0227	-1.00068			0.5828	0.0206	0.4096	0.0294	0.3167	0.0329	0.342	0.0259	0.0897	0.0115	0.34816			0.0015	0.009	-0.0099	0.0104	0.0254	0.0105	0.003	0.0103	0.0096	0.0099	0.00592			-0.869	0.0318	-0.8627	0.0411	-0.3591	0.0377	-0.4551	0.0363	-0.6886
	LEU-151	-0.4028	0.0108	-0.4493	0.0106	-0.1619	0.0098	-0.1939	0.0104	-0.2617	0.0096	-0.29392			0.2501	0.0137	0.0564	0.0094	0.0043	0.0177	0.0675	0.0247	0.022	0.0167	0.08006			0.0167	0.0125	-0.0148	0.0091	0.0036	0.0098	-0.0344	0.0124	-0.0276	0.0115	-0.0113			-0.1367	0.0195	-0.407	0.0157	-0.1533	0.0216	-0.1613	0.0296	-0.2662
	LEU-152	-0.3418	0.0129	-0.3486	0.0128	-0.1544	0.0116	-0.1741	0.0124	-0.1267	0.0099	-0.22912			0.3435	0.0288	0.2138	0.028	0.0954	0.0243	0.2074	0.0228	0.1566	0.0262	0.20334			0.0155	0.0151	0.0108	0.0121	0.0041	0.0085	-0.0112	0.0087	0.0072	0.0088	0.00528			0.0182	0.034	-0.1267	0.0299	-0.0557	0.0265	0.0229	0.028	0.0375
	ALA-153	-0.3947	0.0099	-0.3656	0.0102	-0.2269	0.0096	-0.2647	0.0095	-0.2219	0.009	-0.29476			0.2694	0.0258	0.2142	0.0251	0.0881	0.0238	0.1742	0.0251	0.1238	0.0268	0.17394			-0.0086	0.0048	0.0041	0.0038	0.0043	0.0088	0.0128	0.0071	0.0025	0.0056	0.00302			-0.1331	0.0267	-0.1472	0.0264	-0.133	0.0252	-0.0792	0.0282	-0.0963
	GLN-154	-1.0428	0.0458	-1.1209	0.0501	-0.742	0.0214	-0.9122	0.0311	-1.1747	0.0249	-0.99852			0.6888	0.067	0.6675	0.0619	0.4979	0.0635	0.4273	0.0593	0.496	0.0469	0.5555			-0.0019	0.0091	0.0161	0.0074	-0.01	0.0112	-0.007	0.0082	-0.0072	0.006	-0.002			-0.3537	0.0766	-0.435	0.0785	-0.2567	0.0639	-0.4908	0.0651	-0.6827
	SER-155	0.5037	0.0218	0.5129	0.0223	0.6516	0.0197	0.6015	0.023	0.6206	0.0203	0.57806			0.4171	0.0529	0.3335	0.0474	0.2919	0.0575	0.4067	0.051	0.3496	0.0511	0.35976			0.0013	0.0052	-0.0071	0.0069	0.0002	0.0043	-0.0052	0.0045	0	0.0059	-0.00216			0.9226	0.0591	0.8405	0.0532	0.9419	0.0635	1.0012	0.0557	0.9722
	THR-156	0.832	0.03	0.6544	0.0313	0.2667	0.0196	0.0767	0.0197	0.3624	0.0215	0.43844			0.234	0.0449	0.3672	0.0474	0.5255	0.0546	0.4841	0.0527	0.5963	0.0496	0.44142			0.0173	0.0111	0.0193	0.0126	-0.0038	0.0121	-0.012	0.009	0.0081	0.0091	0.00578			1.0809	0.052	1.0371	0.0561	0.7897	0.0578	0.5478	0.0574	0.9657
	SER-157	0.4101	0.0278	0.2842	0.0264	0.1394	0.0205	0.3406	0.0263	0.3481	0.0234	0.30448			0.4825	0.0518	0.5399	0.0488	0.2344	0.0439	0.2482	0.0375	0.3987	0.0543	0.38074			-0.0097	0.0078	0.0063	0.0068	0.0228	0.0081	-0.01	0.0087	0.0034	0.0076	0.00256			0.8819	0.0567	0.8309	0.0584	0.3972	0.0467	0.5803	0.0442	0.7507
	GLY-158	-0.2374	0.0091	-0.1102	0.0119	0.3093	0.0145	0.5125	0.0117	-0.1637	0.0167	0.0621			0.234	0.0229	0.1466	0.0212	0.14	0.0342	0.2627	0.0355	-0.0106	0.0128	0.15454			-0.0032	0.0093	-0.0015	0.0071	-0.0108	0.006	-0.0018	0.0083	-0.0201	0.0117	-0.00748			-0.0071	0.0266	0.0356	0.0246	0.4389	0.0374	0.775	0.0402	-0.1939
	ASN-159	-0.2606	0.0802	-0.3401	0.0941	-0.2949	0.0652	-0.059	0.0708	-0.1597	0.0774	-0.22286			0.0943	0.0638	0.4614	0.0678	0.2286	0.0641	0.3599	0.0543	0.5642	0.0688	0.34168			-0.0266	0.0137	0.0331	0.0123	0.001	0.0107	0.0124	0.0095	0.0177	0.0101	0.00752			-0.1916	0.1004	0.1531	0.1166	-0.0623	0.0938	0.3107	0.0851	0.4219
	THR-160	-1.1275	0.0555	-1.4198	0.0429	-0.5578	0.0389	-0.4584	0.0457	-0.8187	0.0249	-0.87644			0.1363	0.0355	0.1544	0.0286	0.2838	0.0314	0.2401	0.0405	0.1932	0.0335	0.20156			0.0276	0.0086	-0.0058	0.0115	-0.0215	0.0107	0.004	0.01	0.0229	0.0089	0.00544			-0.9661	0.0669	-1.2742	0.0505	-0.2939	0.0548	-0.2122	0.061	-0.6013
	MET-161	-0.8547	0.0638	-2.6786	0.0621	-2.2149	0.0281	-0.3106	0.027	0.8344	0.0418	-1.04488			-0.526	0.0306	-0.1993	0.0231	-0.0231	0.019	-0.2713	0.0219	-0.3506	0.0167	-0.27406			-0.0165	0.0186	-0.0067	0.0174	0.0065	0.0134	0.0034	0.017	-0.0327	0.0159	-0.0092			-1.3957	0.0608	-2.8816	0.065	-2.2305	0.0337	-0.5803	0.0374	0.4517
	ARG-162	-128.684	0.9701	-109.028	0.7193	-92.0247	0.4258	-89.297	0.4332	-70.9109	0.3801	-97.9887			43.5915	1.3159	9.3316	0.4309	7.4272	0.182	9.085	0.2171	1.95	0.0993	14.2771			-0.3375	0.0207	-0.0586	0.0154	-0.0156	0.0105	-0.0048	0.0104	0.0125	0.0104	-0.0808			-85.4381	0.5558	-99.7221	0.4816	-84.6348	0.3527	-80.2228	0.395	-68.9398
	MET-163	-0.5539	0.0796	-0.7935	0.0606	-0.4829	0.0563	-0.3564	0.069	-0.5815	0.0283	-0.55364			0.0428	0.037	0.1954	0.0225	0.1329	0.0222	0.1518	0.0244	0.2589	0.0221	0.15636			0.015	0.0129	0.0086	0.0098	-0.0045	0.0115	0.0099	0.0125	-0.0029	0.0066	0.00522			-0.4967	0.0788	-0.5908	0.0638	-0.3543	0.0614	-0.1911	0.0715	-0.3249
	LEU-164	-1.4026	0.0219	-1.514	0.0163	-1.0191	0.0185	-1.0494	0.0179	-0.6133	0.0163	-1.11968			0.5125	0.0129	0.2174	0.0064	0.2103	0.0052	0.2513	0.0062	0.1548	0.0036	0.26926			-0.0222	0.0119	0.0104	0.0116	0.0166	0.0097	-0.0459	0.012	-0.0251	0.0149	-0.01324			-0.9127	0.0207	-1.2857	0.0207	-0.7931	0.0205	-0.8438	0.0207	-0.4825
	GLY-165	-1.8743	0.0299	-1.8221	0.0256	-2.1629	0.0249	-2.1759	0.0217	-0.5093	0.0263	-1.7089			0.7292	0.0153	0.3097	0.0084	0.4411	0.0083	0.5569	0.0085	0.1403	0.009	0.43544			-0.0153	0.0082	-0.0194	0.0096	-0.001	0.0033	-0.0068	0.0026	0.0011	0.0045	-0.00828			-1.1596	0.0234	-1.5323	0.0256	-1.7223	0.0235	-1.6258	0.0199	-0.3677
	GLU-166	77.9165	0.2787	69.4287	0.2827	69.872	0.3313	70.7278	0.309	61.6451	0.2761	69.918			-2.642	0.159	-0.4959	0.1383	-0.5134	0.1582	-2.3786	0.1617	0.3383	0.129	-1.13832			0.0231	0.008	-0.0029	0.0104	-0.0162	0.0082	0.0001	0.0069	-0.0067	0.0061	-0.00052			75.3135	0.2608	68.9245	0.2935	69.3665	0.3268	68.3522	0.2954	61.9846
	ASP-167	52.5726	0.244	48.4589	0.2312	47.366	0.2286	47.9792	0.1991	42.1851	0.1813	47.7124			-0.3449	0.1297	0.7296	0.1297	0.8116	0.1357	0.545	0.1229	1.6609	0.1318	0.68044			-0.0169	0.0079	0.0013	0.0076	-0.009	0.0071	0.0006	0.0053	0.0053	0.0134	-0.00374			52.2122	0.2487	49.1843	0.2562	48.1646	0.2498	48.518	0.2195	43.8494
	TYR-168	-1.6875	0.0331	-1.77	0.0371	-1.1612	0.0171	-1.3374	0.026	-1.4579	0.0231	-1.4828			0.784	0.0326	0.4971	0.0341	0.3208	0.0207	0.4415	0.0244	0.6111	0.0261	0.5309			-0.0009	0.0122	0.0356	0.0118	0.0037	0.01	-0.0063	0.0093	-0.021	0.0141	0.00222			-0.9043	0.0345	-1.2393	0.0447	-0.8362	0.0265	-0.9013	0.0337	-0.8679
	GLY-169	-1.3059	0.0374	-1.2432	0.0384	0.5877	0.02	0.5748	0.0177	-0.2687	0.0467	-0.33106			0.6741	0.0155	0.5256	0.0152	0.1661	0.0154	0.221	0.017	0.3261	0.0253	0.38258			0.0008	0.0024	0.0022	0.0034	-0.0047	0.0035	-0.009	0.0033	-0.0094	0.0047	-0.00402			-0.6316	0.0375	-0.7144	0.0409	0.7487	0.0215	0.787	0.0185	0.0479
	VAL-170	1.7569	0.0228	1.1582	0.028	1.563	0.0227	1.4309	0.0237	1.9045	0.0322	1.5627			-0.1424	0.0257	0.1058	0.0253	-0.4502	0.0121	-0.4749	0.0124	-0.0609	0.0272	-0.20452			-0.0027	0.0087	-0.0023	0.0091	0.0092	0.0075	0.0155	0.0091	-0.0007	0.0115	0.0038			1.6132	0.0257	1.2638	0.0312	1.1223	0.0196	0.9717	0.0196	1.8412
	SER-171	-0.0036	0.1693	2.4901	0.1215	1.2941	0.1105	1.0855	0.1575	0.9781	0.138	1.16884			-0.6453	0.0745	-1.2011	0.0572	-1.0039	0.0645	-1.3294	0.0858	3.2617	0.1935	-0.1836			-0.037	0.0095	-0.0034	0.0043	-0.0061	0.0059	0.0084	0.0051	-0.4538	0.0211	-0.09838			-0.6857	0.1491	1.2878	0.1014	0.2889	0.0972	-0.2302	0.1161	3.7921
	TYR-172	-13.6158	0.2096	-0.7507	0.1863	-0.0782	0.1203	0.3197	0.1094	-10.5681	0.4267	-4.93862			7.6332	0.1932	0.772	0.1687	-0.5083	0.0571	-1.1237	0.0657	5.4029	0.2714	2.43522			-1.4163	0.0269	-0.2274	0.0331	-0.006	0.0101	-0.0028	0.0121	-0.8914	0.0419	-0.50878			-7.389	0.1624	-0.2049	0.1077	-0.5837	0.12	-0.8053	0.102	-6.0674
	THR-173	-18.546	0.2515	-3.8126	0.158	-3.2124	0.1247	-2.5317	0.1429	-18.6041	0.4421	-9.34136			11.9525	0.1876	1.0229	0.1561	0.0482	0.1243	-0.9805	0.1926	14.6059	0.4443	5.3298			-1.1595	0.0131	-0.7597	0.0229	-0.5984	0.0233	-0.6481	0.0234	-1.2731	0.018	-0.88776			-7.755	0.1859	-3.5531	0.1255	-3.7605	0.1243	-4.1642	0.1353	-5.3012
	HIS-174	-1.1431	0.2688	1.0262	0.1653	2.623	0.1827	3.9022	0.2256	-9.7712	0.7129	-0.67258			0.6621	0.294	-1.1362	0.1033	-0.9552	0.1467	-2.9702	0.1899	18.1257	0.9798	2.74524			-0.4713	0.021	-0.0258	0.0105	-0.1263	0.0157	-0.1393	0.0146	-1.1224	0.0436	-0.37702			-0.9482	0.1486	-0.1364	0.1198	1.5458	0.1345	0.7836	0.1428	7.28
	PHE-175	-0.5649	0.0636	0.6357	0.0539	0.7956	0.0444	0.5589	0.055	-1.7312	0.0657	-0.06118			-0.6628	0.0608	-0.1836	0.0314	-0.3297	0.0229	-0.1759	0.0298	0.9975	0.043	-0.0709			0.0522	0.0127	-0.0386	0.0205	0.0055	0.0091	0.0079	0.0092	0.0078	0.0085	0.00696			-1.1726	0.0427	0.4124	0.0536	0.4739	0.0371	0.3899	0.0398	-0.7278
	ARG-176	-120.897	0.9003	-151.485	1.7786	-142.976	1.6113	-136.219	1.2683	-122.49	1.4129	-134.813			21.2053	0.755	37.1692	2.1959	40.1219	2.2964	34.2939	1.7801	23.062	1.2131	31.1705			-0.2379	0.0226	-0.7569	0.0508	-0.7876	0.0543	-0.811	0.0457	-0.3813	0.0336	-0.59494			-99.9656	0.532	-114.992	0.6589	-103.645	1.0536	-102.739	0.6381	-99.7523
	ARG-177	-159.66	0.7821	-173.765	1.0881	-151.109	2.388	-153.588	1.5509	-164.473	0.7417	-160.519			130.091	0.7424	121.005	1.1393	98.6541	1.933	111.947	1.2596	128.202	0.7716	117.98			-2.762	0.0242	-2.7024	0.03	-2.6826	0.0393	-2.7978	0.0258	-2.7682	0.0244	-2.7426			-32.3458	0.4817	-55.4059	0.5226	-55.1922	0.7103	-44.5018	0.5535	-39.0553
	LEU-178	-0.6097	0.1219	0.5367	0.1174	0.1347	0.0731	-0.7316	0.086	-1.4892	0.1229	-0.43182			0.278	0.0804	0.4624	0.0428	0.5995	0.023	0.6904	0.0516	0.652	0.05	0.53646			-0.0765	0.0179	-0.0062	0.0177	-0.0036	0.0097	-0.0106	0.0088	-0.003	0.0154	-0.01998			-0.4048	0.0685	0.9938	0.0965	0.73	0.0643	-0.0566	0.0861	-0.8464
	CYS-179	-8.6886	0.4126	-3.4407	0.1725	-3.5936	0.0806	-3.6826	0.0685	-3.3268	0.0835	-4.54646			3.8858	0.2682	0.5315	0.079	1.3138	0.0738	0.5256	0.0373	0.8683	0.0426	1.425			-0.4031	0.0211	-0.2111	0.0167	-0.0093	0.009	0.0243	0.0085	0.0173	0.0076	-0.11638			-5.2096	0.2118	-3.1192	0.1296	-2.2926	0.0874	-3.1306	0.0682	-2.4394
	SER-180	-6.3799	0.1188	-6.1358	0.0672	-2.951	0.1225	-3.9628	0.1437	-3.4805	0.097	-4.582			2.5502	0.0917	1.5131	0.0444	1.2111	0.0821	0.7956	0.071	0.733	0.047	1.3606			0.0392	0.0083	-0.0118	0.0072	-0.0015	0.0076	-0.005	0.009	0.0085	0.0073	0.00588			-3.7874	0.0718	-4.6325	0.0589	-1.7341	0.0886	-3.1739	0.1481	-2.7461
	ARG-181	-81.1107	0.683	-75.667	0.7744	-58.6268	0.6267	-73.1295	0.7238	-57.5852	0.5415	-69.2238			36.925	0.5967	32.8089	0.7476	35.6163	0.7232	63.5351	0.9257	28.6601	0.722	39.5091			-0.0428	0.0205	-0.2885	0.0215	-0.5939	0.0216	-0.9816	0.0204	-0.3124	0.0242	-0.44384			-44.1799	0.6481	-43.1374	0.8373	-23.5754	0.412	-10.5842	0.565	-29.2586
	ALA-182	-0.8732	0.045	-0.8948	0.0495	-1.2369	0.041	-1.1039	0.0423	-0.5037	0.0242	-0.9225			0.2749	0.0196	0.2157	0.014	0.2956	0.0164	0.2556	0.0148	0.4501	0.018	0.29838			-0.0143	0.0074	-0.01	0.0083	0.0029	0.0075	0.0224	0.0094	0.0118	0.0082	0.00256			-0.6117	0.0343	-0.6891	0.044	-0.9393	0.041	-0.8257	0.0407	-0.0432
	LEU-183	2.0654	0.0274	1.7921	0.0345	1.23	0.0204	-0.9632	0.0242	0.1032	0.0278	0.8455			-0.1385	0.0227	0.1064	0.0293	0.1239	0.0216	0.3412	0.0186	0.0456	0.0089	0.09572			-0.0101	0.0188	0.0166	0.0178	0.0045	0.0142	0.0327	0.0142	-0.0115	0.0136	0.00644			1.9163	0.0323	1.9147	0.0447	1.3599	0.0328	-0.5888	0.0305	0.1379
	GLY-184	3.065	0.0413	2.8742	0.0455	1.7645	0.0493	0.5119	0.0247	-0.0455	0.0181	1.63402			-0.047	0.0251	0.1044	0.0242	0.1232	0.0221	-0.0392	0.024	-0.0407	0.0101	0.02014			0.0015	0.008	-0.0313	0.0103	-0.019	0.0113	0.0002	0.0076	0.003	0.0073	-0.00912			3.0197	0.0424	2.9454	0.0504	1.8698	0.0552	0.4742	0.0339	-0.0831
	GLY-185	1.2959	0.0381	1.234	0.0335	0.7664	0.0382	0.568	0.0256	0.3982	0.021	0.8525			-0.3456	0.0172	-0.1099	0.0152	-0.0433	0.0158	-0.1462	0.014	0.0844	0.012	-0.11212			0.0115	0.0075	0.009	0.0075	-0.0046	0.006	-0.0001	0.0048	-0.0061	0.0052	0.00194			0.9609	0.0407	1.1303	0.0399	0.7181	0.0401	0.421	0.0291	0.4769
	LYS-186	-55.1548	0.2432	-54.7887	0.2579	-49.9798	0.2107	-52.0412	0.2754	-52.0281	0.2896	-52.7985			1.3779	0.1342	0.7126	0.1328	0.726	0.1226	0.8807	0.1214	0.661	0.1343	0.87164			-0.0041	0.0087	-0.0275	0.0095	-0.0255	0.0108	0.0083	0.0108	-0.0004	0.0075	-0.00984			-53.7608	0.2768	-54.0977	0.2936	-49.2769	0.2454	-51.1355	0.3075	-51.3683
	ALA-187	-1.1364	0.0185	-0.9885	0.0143	-0.9894	0.0107	-0.6758	0.0136	-1.0386	0.012	-0.96574			0.0064	0.0068	-0.0537	0.0118	-0.0011	0.0085	-0.0373	0.0076	0.0282	0.0032	-0.0115			-0.0161	0.0081	0.0088	0.0089	0.0023	0.0101	0.0118	0.0075	0.001	0.0057	0.00156			-1.1462	0.0184	-1.0336	0.0208	-0.9886	0.0171	-0.701	0.0155	-1.0098
	LYS-188	-39.8734	0.2041	-39.9943	0.19	-37.1826	0.1265	-37.6349	0.1475	-36.7981	0.1394	-38.2967			1.3539	0.1388	0.8967	0.1295	0.7771	0.1236	1.2148	0.1309	1.051	0.1196	1.0587			-0.0006	0.0085	0.0007	0.0075	0.001	0.0084	0.0131	0.0086	-0.0134	0.0096	0.00016			-38.5169	0.2338	-39.0933	0.2414	-36.3963	0.1819	-36.4103	0.1993	-35.7634
	SER-189	-1.061	0.0291	-1.2388	0.0409	-1.1355	0.0293	-0.7804	0.0201	-0.9593	0.0276	-1.035			0.45	0.0476	0.3191	0.0466	0.3289	0.0524	0.2633	0.0384	0.4643	0.0482	0.36512			-0.005	0.0069	0.0018	0.0076	0.0086	0.0086	0.0023	0.0072	-0.0052	0.0083	0.0005			-0.617	0.0562	-0.9161	0.0592	-0.7997	0.0595	-0.515	0.0406	-0.4984
	GLU-190	49.3116	0.1681	53.5899	0.1914	45.3643	0.185	50.4076	0.2452	45.1911	0.2062	48.7729			-4.1749	0.1348	-2.2221	0.0873	-1.0538	0.0733	-0.9146	0.0732	-0.4114	0.0858	-1.75536			0.007	0.0075	-0.0021	0.0102	0.014	0.01	0.0069	0.0108	0.006	0.0098	0.00636			45.1506	0.1507	51.3639	0.1735	44.3212	0.1903	49.4995	0.2504	44.7853
	LEU-191	-1.1227	0.0086	-1.1591	0.0071	-1.0502	0.0057	-0.9086	0.0082	-0.9624	0.0067	-1.0406			0.0385	0.0099	-0.0044	0.0085	0.0316	0.0052	-0.0175	0.0061	0.0229	0.0048	0.01422			-0.0258	0.0135	-0.0265	0.0164	0.0065	0.0105	-0.0278	0.0118	-0.0073	0.0104	-0.01618			-1.1092	0.0174	-1.1901	0.0196	-1.0122	0.0132	-0.9537	0.0162	-0.9461
	ARG-192	-33.8229	0.1382	-35.1514	0.155	-32.6815	0.1691	-33.8854	0.1578	-31.5229	0.1313	-33.4128			1.0489	0.0609	0.7543	0.0601	0.4756	0.0594	0.708	0.0538	0.6237	0.059	0.7221			0.0157	0.0089	0.0082	0.0091	0.0023	0.0092	-0.0003	0.0078	0.0076	0.0077	0.0067			-32.7632	0.1375	-34.3866	0.1602	-32.1961	0.1794	-33.1809	0.1657	-30.8893
	ASN-193	-2.3289	0.0615	-2.8459	0.0277	-2.2129	0.0242	-2.1438	0.0429	-1.88	0.0282	-2.2823			0.6189	0.0453	0.6054	0.0454	0.412	0.0406	0.4699	0.0519	0.6117	0.0596	0.54358			-0.0032	0.0092	-0.0193	0.01	0.0098	0.0103	-0.0131	0.0092	0.013	0.0083	-0.00256			-1.7121	0.0671	-2.2602	0.0518	-1.792	0.0491	-1.6902	0.0694	-1.2572
	TRP-194	-0.0967	0.0159	0.0577	0.0131	0.371	0.0105	0.3043	0.0134	0.4296	0.0103	0.21318			0.0535	0.0189	-0.053	0.0114	-0.0714	0.0117	0.029	0.0105	-0.0849	0.0091	-0.02536			0.0081	0.0171	-0.0117	0.0141	-0.0281	0.0145	-0.0126	0.0141	0.004	0.0113	-0.00806			-0.0371	0.0253	-0.0064	0.0211	0.2716	0.0199	0.321	0.0197	0.3495
	ARG-195	-27.4606	0.1138	-26.9147	0.1103	-24.8937	0.1216	-26.7348	0.1333	-23.3654	0.1025	-25.8738			1.1446	0.0704	0.6022	0.0579	0.3512	0.0631	0.7462	0.0578	0.4016	0.0561	0.64916			-0.012	0.0105	0.0116	0.0096	-0.0075	0.01	-0.0118	0.0103	-0.0073	0.0085	-0.0054			-26.3256	0.1121	-26.3044	0.1156	-24.5499	0.1327	-26.0005	0.1417	-22.9747
	MET-196	-0.9065	0.0275	-1.328	0.0225	-0.9523	0.0294	-0.9948	0.0329	-0.9532	0.0288	-1.02696			0.1385	0.0149	0.1107	0.015	0.0702	0.014	0.1055	0.0145	0.0803	0.0154	0.10104			-0.0172	0.0156	0.0195	0.0155	0.0078	0.0169	0.0049	0.0149	-0.0263	0.0161	-0.00226			-0.7841	0.0305	-1.1985	0.0301	-0.8723	0.0349	-0.8864	0.0386	-0.896
	ALA-197	-0.9238	0.0057	-0.9543	0.0067	-0.7736	0.0073	-0.8823	0.008	-0.7349	0.0065	-0.85378			0.1292	0.0042	0.0543	0.0037	0.0359	0.0037	0.0765	0.0029	0.0214	0.0038	0.06346			-0.0116	0.0115	-0.0183	0.0091	-0.0091	0.0131	-0.0508	0.0114	-0.0033	0.0099	-0.01862			-0.8059	0.0117	-0.918	0.0112	-0.7469	0.0152	-0.8573	0.0135	-0.7169
	GLN-198	-0.7636	0.0527	-0.3224	0.0388	-0.6269	0.0556	-0.7216	0.0384	-0.4891	0.0587	-0.58472			0.3707	0.0363	0.6927	0.0471	0.0814	0.0416	0.4195	0.0412	0.1276	0.0392	0.33838			0.0199	0.0085	-0.0073	0.0114	0.0096	0.0094	0.0065	0.0089	-0.0007	0.0087	0.0056			-0.3735	0.0596	0.3609	0.0622	-0.5359	0.0757	-0.2936	0.0577	-0.3664
	SER-199	-0.7727	0.0201	-0.8124	0.0218	-0.7749	0.0188	-0.8851	0.0222	-0.7122	0.0207	-0.79146			0.3485	0.0415	0.1896	0.0385	0.2258	0.0381	0.257	0.0373	0.2415	0.0426	0.25248			0.0028	0.0055	-0.0023	0.0063	-0.0132	0.0059	-0.0104	0.0065	0.0098	0.0051	-0.00266			-0.4215	0.0469	-0.6259	0.043	-0.5615	0.0433	-0.637	0.0406	-0.46
	LEU-200	-0.6769	0.0043	-0.7508	0.0059	-0.5966	0.0057	-0.7184	0.0069	-0.5643	0.0067	-0.6614			0.0625	0.0046	0.0162	0.0069	-0.0013	0.0057	0.0414	0.0058	-0.0237	0.0058	0.01902			0.009	0.0126	0.0051	0.0126	0.011	0.0145	0.0111	0.0127	0.015	0.0126	0.01024			-0.6047	0.0137	-0.7296	0.0157	-0.5872	0.0176	-0.665	0.016	-0.5731
	LEU-201	-0.6752	0.0077	-0.7711	0.009	-0.6342	0.0081	-0.7301	0.0095	-0.6162	0.0073	-0.68536			0.1644	0.017	0.1462	0.0185	0.051	0.0159	0.0749	0.013	0.0878	0.0162	0.10486			0.009	0.0121	0.011	0.0133	0.0444	0.0158	0.0294	0.0145	0.0025	0.0144	0.01926			-0.5027	0.0224	-0.6135	0.0242	-0.5397	0.0239	-0.6263	0.0224	-0.5267
	ASN-202	-0.5804	0.0517	-0.6629	0.0552	-0.8017	0.0498	-0.5723	0.0527	-0.2976	0.046	-0.58298			0.9028	0.0686	0.8349	0.0728	0.6071	0.0693	0.441	0.0677	0.9319	0.0779	0.74354			0.0047	0.0079	-0.002	0.0084	-0.0017	0.0088	0.0161	0.0078	-0.0086	0.0085	0.0017			0.3276	0.0781	0.168	0.0957	-0.1919	0.0876	-0.114	0.0821	0.6274
	SER-203	-0.1909	0.0098	-0.2701	0.0095	-0.1809	0.0093	-0.2827	0.0124	-0.1525	0.0087	-0.21542			0.1694	0.0264	0.2322	0.0354	0.1391	0.0322	0.2138	0.0316	0.1618	0.0292	0.18326			-0.0074	0.0075	0.0138	0.008	-0.019	0.0097	0.0033	0.0079	-0.0063	0.0097	-0.00312			-0.0287	0.0297	-0.0229	0.0371	-0.0611	0.0354	-0.0657	0.0354	0.0026
	VAL-204	-0.3808	0.0054	-0.4717	0.0073	-0.4119	0.0058	-0.4528	0.0066	-0.4069	0.0065	-0.42482			0.0156	0.0212	0.0067	0.0224	0.0175	0.0169	0.0261	0.0152	-0.0177	0.0224	0.00964			0.0119	0.0208	0.0169	0.0179	0.0191	0.0191	-0.051	0.0178	-0.0447	0.0173	-0.00956			-0.3537	0.0305	-0.4483	0.0283	-0.3747	0.0269	-0.477	0.023	-0.4694
	GLU-205	16.1829	0.0735	15.9774	0.1186	15.5085	0.0772	16.0261	0.1169	14.8618	0.0828	15.7113			1.3065	0.127	1.3794	0.1378	1.1769	0.1493	0.9187	0.146	1.317	0.1427	1.2197			0.0113	0.0097	0.0276	0.0104	-0.0061	0.0101	0.0099	0.0104	0.0131	0.0099	0.01116			17.497	0.1404	17.3811	0.1674	16.6771	0.154	16.9515	0.1818	16.1908
	GLY-206	0.1557	0.0046	0.172	0.0111	0.1593	0.0057	0.2127	0.0056	0.191	0.0054	0.17814			0.0046	0.0098	0.0232	0.0152	0.0277	0.0118	0.0261	0.0075	0.0363	0.0078	0.02358			0.0052	0.0045	0.0044	0.0044	0.0075	0.0047	0.007	0.0029	-0.0073	0.0032	0.00336			0.1652	0.0115	0.1999	0.0164	0.1942	0.014	0.2455	0.009	0.2203
	HIS-207	0.5591	0.0187	0.531	0.022	0.6003	0.0199	0.7871	0.0208	0.7666	0.0172	0.64882			0.3198	0.061	0.4439	0.0603	0.4563	0.0638	0.2553	0.0609	0.3467	0.0613	0.3644			0.0097	0.0068	-0.0086	0.0083	0.0145	0.0083	-0.0059	0.0087	-0.0155	0.0085	-0.00116			0.8935	0.0618	0.969	0.0633	1.0677	0.0672	1.04	0.0627	1.0992
	GLU-208	19.7569	0.0697	20.8127	0.1001	19.4266	0.0766	20.4539	0.1013	18.7025	0.0742	19.8305			0.5889	0.0787	0.324	0.0578	0.5037	0.0878	0.3595	0.0814	0.7582	0.0806	0.50686			0.038	0.0155	0.0149	0.0145	0.0195	0.0128	-0.0204	0.0119	-0.0242	0.0128	0.00556			20.382	0.1046	21.1583	0.1087	19.9549	0.1094	20.797	0.1162	19.4403
	ASN-209	0.254	0.0141	0.3232	0.0126	0.3446	0.0078	0.4384	0.0088	0.3062	0.0089	0.33328			0.5213	0.0642	0.6138	0.0603	0.4582	0.0626	0.4702	0.0569	0.5807	0.0634	0.52884			-0.0086	0.0086	-0.0078	0.0095	0.0182	0.0107	0.0164	0.0114	-0.0098	0.0137	0.00168			0.7673	0.0629	0.9293	0.0626	0.8169	0.0608	0.9237	0.0602	0.8779
	ILE-210	0.0629	0.0042	0.0081	0.0053	-0.023	0.0049	0.0099	0.0055	-0.0495	0.0046	0.00168			-0.0199	0.0129	-0.0279	0.0104	-0.0071	0.0081	-0.0229	0.0083	-0.0266	0.0089	-0.02088			-0.0881	0.025	0.0129	0.021	0.0065	0.0188	-0.0693	0.0225	-0.058	0.0212	-0.0392			-0.0456	0.0255	-0.0055	0.025	-0.0231	0.0199	-0.0818	0.024	-0.133
	THR-211	0.1045	0.0055	0.0966	0.0065	0.0556	0.0067	0.0989	0.0067	0.0298	0.0067	0.07708			0.3502	0.0396	0.3474	0.0373	0.2094	0.0393	0.272	0.0352	0.3333	0.0401	0.30246			-0.013	0.0136	-0.0063	0.0156	-0.0031	0.0147	0.0169	0.014	-0.003	0.0116	-0.0017			0.4391	0.0414	0.4412	0.0406	0.2595	0.0412	0.3885	0.0381	0.3571
	GLN-212	0.2481	0.0077	0.3147	0.0063	0.2381	0.0092	0.3	0.0072	0.2473	0.0087	0.26964			0.4671	0.0649	0.56	0.0599	0.4637	0.061	0.4706	0.0581	0.6109	0.0591	0.51446			0.0102	0.0109	-0.0079	0.0101	0.0035	0.0121	0.0158	0.0108	-0.0097	0.0142	0.00238			0.726	0.0664	0.8679	0.0601	0.7067	0.0639	0.7885	0.0586	0.8484
	LEU-213	0.0191	0.0051	-0.0678	0.0058	-0.0992	0.0049	-0.0891	0.0055	-0.1101	0.0047	-0.06942			0.0047	0.0046	0.0114	0.0032	0.0084	0.003	0.0044	0.0028	0.0055	0.0024	0.00688			0.0322	0.0164	0.0181	0.0158	0.0069	0.0144	-0.0322	0.015	-0.0367	0.0122	-0.00234			0.0561	0.0173	-0.0382	0.0168	-0.0841	0.0144	-0.1171	0.0171	-0.1414
	ALA-214	0.1281	0.0045	0.0717	0.0049	0.0313	0.0041	0.0553	0.0042	0.0161	0.004	0.0605			-0.0078	0.0055	-0.0062	0.0045	0.0049	0.0061	-0.0001	0.0053	0.0004	0.0045	-0.00176			-0.0021	0.0046	0.0027	0.006	0.0029	0.0045	0.0047	0.0047	-0.0052	0.0043	0.0006			0.1182	0.0087	0.0685	0.0082	0.0392	0.0082	0.06	0.0083	0.0108
	VAL-215	0.0968	0.0044	0.0343	0.0056	0.0081	0.0047	0.0299	0.0052	-0.0138	0.0043	0.03106			0.059	0.0157	0.0576	0.0184	0.0539	0.0187	0.0512	0.0171	0.1248	0.0186	0.0693			0.0028	0.0071	0.0001	0.0094	0.0082	0.0073	-0.0032	0.0086	0.0203	0.0089	0.00564			0.1591	0.0177	0.0926	0.019	0.0706	0.0214	0.078	0.0192	0.1309
	ASN-216	0.3067	0.0148	0.1266	0.0158	0.1596	0.0112	0.1757	0.0193	0.1452	0.0107	0.18276			0.5494	0.0616	0.5816	0.0657	0.5363	0.068	0.4662	0.0579	0.5072	0.0676	0.52814			0	0.0077	0.0109	0.0066	-0.0077	0.0083	-0.0007	0.007	-0.0073	0.0075	-0.00096			0.8612	0.0629	0.7166	0.0658	0.6872	0.0663	0.6391	0.0612	0.645
	HIS-217	0.8637	0.0168	0.8057	0.0189	0.758	0.0146	0.8168	0.0315	0.6843	0.015	0.7857			0.3723	0.0479	0.3823	0.0502	0.3341	0.0457	0.3035	0.0415	0.4235	0.0462	0.36314			0.0056	0.0071	-0.002	0.0093	0.0072	0.0077	-0.0068	0.0091	0.0015	0.0066	0.0011			1.2422	0.0472	1.1819	0.0508	1.0997	0.0491	1.1136	0.054	1.1092
	GLY-218	0.2655	0.0068	0.2798	0.0078	0.2211	0.0064	0.253	0.0075	0.1946	0.0056	0.2428			0.1632	0.0266	0.1642	0.027	0.1626	0.0266	0.1239	0.028	0.1999	0.0257	0.16276			0.0002	0.0063	-0.001	0.0052	0.0087	0.0044	0.0008	0.0053	-0.0012	0.0046	0.0015			0.4292	0.0281	0.4426	0.0272	0.3912	0.0273	0.3792	0.0282	0.394
	TYR-219	-0.096	0.0082	-0.2014	0.0066	-0.198	0.008	-0.1961	0.0064	-0.2028	0.0056	-0.17886			0.0813	0.0287	0.0525	0.0288	0.0613	0.031	0.065	0.0232	0.0964	0.0268	0.0713			-0.0029	0.0122	-0.0128	0.0127	0.004	0.0114	0.0162	0.0124	-0.0041	0.0123	8e-05			-0.0192	0.0332	-0.161	0.0325	-0.1323	0.0345	-0.1157	0.0273	-0.11
	SER-220	-0.2128	0.0079	-0.2365	0.0082	-0.1785	0.0086	-0.2555	0.0102	-0.1667	0.0074	-0.21			0.8312	0.0486	0.8167	0.0555	0.6292	0.0497	0.6776	0.0541	0.8408	0.0489	0.7591			-0.0055	0.003	0.0002	0.0034	-0.0006	0.0035	-0.0006	0.0032	0.0049	0.0031	-0.00032			0.6142	0.0506	0.5809	0.0573	0.4511	0.0511	0.4181	0.0564	0.6807
	SER-221	0.1389	0.0086	0.2079	0.0084	0.1819	0.0094	0.2351	0.0091	0.1292	0.0095	0.1786			0.3905	0.0435	0.3323	0.039	0.3405	0.043	0.3491	0.0426	0.2489	0.0362	0.33226			-0.0001	0.0057	-0.0008	0.0048	0.0038	0.0066	0.002	0.0052	-0.0152	0.0056	-0.00206			0.528	0.0469	0.5404	0.0392	0.5279	0.0444	0.5884	0.0439	0.3635
	PRO-222	0.1997	0.0023	0.2429	0.003	0.216	0.0025	0.2583	0.0031	0.2121	0.002	0.2258			-0.0094	0.0052	-0.0026	0.0054	0.0041	0.0061	-0.0068	0.005	-0.0059	0.0055	-0.00412			-0.0375	0.0157	0.0107	0.0154	-0.0114	0.017	0.0047	0.0163	-0.0187	0.0131	-0.01044			0.1527	0.0169	0.2514	0.0165	0.2075	0.0182	0.2571	0.0175	0.1878
	SER-223	0.3606	0.0087	0.5074	0.0133	0.4256	0.0122	0.5061	0.0137	0.3959	0.0109	0.43912			0.4151	0.0467	0.5107	0.0547	0.4738	0.054	0.3936	0.0519	0.4593	0.0495	0.4505			-0.0015	0.0034	0.0007	0.0043	0.002	0.0043	0.0178	0.0054	0.0007	0.0045	0.00394			0.776	0.0493	1.0188	0.0582	0.9022	0.0565	0.9165	0.0566	0.8548
	HIS-224	-0.0212	0.0226	-0.0766	0.0207	0.0216	0.0276	-0.108	0.0209	0.327	0.0285	0.02856			0.307	0.0572	0.3039	0.0547	0.2889	0.0605	0.3736	0.0614	0.3001	0.0525	0.3147			-0.0015	0.0061	0.0014	0.006	-0.0072	0.0076	-0.0052	0.0056	-0.022	0.0083	-0.0069			0.2872	0.0624	0.2287	0.0564	0.3004	0.0652	0.2584	0.0621	0.6066
	PHE-225	0.5509	0.0046	0.6459	0.0058	0.5483	0.0052	0.6511	0.0065	0.5227	0.0049	0.58378			-0.0246	0.0049	-0.0071	0.005	-0.0046	0.0052	-0.0271	0.0045	-0.0027	0.004	-0.01322			-0.0088	0.0083	-0.007	0.0108	-0.0083	0.009	0.007	0.0091	-0.0201	0.0097	-0.00744			0.5174	0.0108	0.6313	0.0125	0.536	0.0116	0.6309	0.0119	0.5
	SER-226	0.6144	0.0078	0.7624	0.0129	0.6359	0.013	0.7934	0.0128	0.6625	0.0108	0.69372			0.1165	0.0289	0.1519	0.0262	0.1739	0.0323	0.0808	0.0271	0.1855	0.0347	0.14172			-0.0481	0.0134	0.0298	0.016	-0.0026	0.0126	-0.0273	0.0127	-0.0137	0.0143	-0.01238			0.6824	0.0328	0.9447	0.0345	0.807	0.0368	0.8474	0.0346	0.8355
	SER-227	0.6459	0.0149	0.8011	0.0159	0.6845	0.0136	0.8657	0.02	0.6898	0.0142	0.7374			0.392	0.0464	0.3538	0.0462	0.3244	0.0456	0.3499	0.0449	0.4209	0.048	0.3682			-0.0015	0.0061	-0.0143	0.0069	0.0083	0.0065	0.0092	0.0065	0.0117	0.0058	0.00268			1.0378	0.0494	1.1416	0.0537	1.0173	0.0501	1.2229	0.0507	1.1189
	GLU-228	30.5688	0.08	32.2403	0.14	30.3934	0.0972	32.6885	0.1277	28.9375	0.1037	30.9657			0.4357	0.1061	0.5998	0.0884	0.5729	0.0969	0.5039	0.0791	0.7809	0.0998	0.57864			0.0001	0.0084	-0.0079	0.0104	0.003	0.0085	0.0167	0.009	-0.0117	0.0095	4e-05			31.0033	0.1181	32.8338	0.1621	30.9735	0.1302	33.2104	0.1434	29.7115
	ILE-229	0.6962	0.0044	0.8399	0.0063	0.6674	0.0068	0.7896	0.0083	0.6553	0.0074	0.72968			-0.0787	0.004	-0.0355	0.003	-0.011	0.0027	-0.0514	0.0036	-0.0066	0.0029	-0.03664			0.0137	0.0109	0.016	0.0107	0.0134	0.0104	0.0175	0.0096	-0.0052	0.0098	0.01108			0.6312	0.0123	0.8202	0.0129	0.6703	0.0125	0.7552	0.0122	0.6431
	LYS-230	-28.8969	0.112	-31.4131	0.1504	-30.4486	0.1153	-32.8262	0.1818	-29.6836	0.1329	-30.6537			1.2131	0.1488	1.1661	0.1427	0.9481	0.136	1.2419	0.1384	1.3411	0.1389	1.18206			-0.0268	0.0115	0.0022	0.0105	0.0016	0.0115	-0.0087	0.0106	0.0094	0.0121	-0.00446			-27.7096	0.1943	-30.2442	0.2094	-29.5101	0.1717	-31.5828	0.2191	-28.3323
	GLU-231	36.0734	0.1467	39.0069	0.2102	37.0558	0.1362	40.2571	0.1975	35.7247	0.1546	37.6236			0.8755	0.1272	1.0952	0.1397	0.5917	0.1411	1.0308	0.1421	1.2947	0.1228	0.97758			-0.0007	0.0084	-0.0084	0.0093	0.0239	0.009	0.0193	0.0096	0.003	0.009	0.00742			36.9456	0.1935	40.0778	0.2614	37.6622	0.2013	41.3019	0.2486	37.0213
	LEU-232	1.1021	0.007	1.3325	0.0086	1.1006	0.0089	1.2502	0.0137	1.0763	0.01	1.17234			0.0132	0.0185	0.0898	0.0246	0.0679	0.0188	0.0525	0.0178	0.1493	0.0243	0.07454			-0.0123	0.0168	-0.0233	0.0177	0.0192	0.0176	0.0012	0.0151	-0.039	0.0169	-0.01084			1.103	0.0253	1.3985	0.0304	1.1891	0.0293	1.3048	0.0263	1.1872
	ILE-233	0.2724	0.0152	0.3979	0.0189	0.2593	0.0182	0.1879	0.0191	0.3344	0.018	0.29038			-0.0798	0.018	-0.0486	0.012	-0.0007	0.0136	-0.0754	0.0102	-0.0045	0.0076	-0.0418			0.0389	0.0111	0.0249	0.0139	0.0331	0.0122	0.0229	0.011	0.012	0.0129	0.02636			0.2308	0.0273	0.3745	0.0274	0.2909	0.0269	0.1345	0.0234	0.3409
	GLY-234	-0.1986	0.0117	-0.1502	0.0155	0.0288	0.0149	0.0525	0.0177	0.0744	0.018	-0.03862			0.105	0.0157	0.1138	0.0173	0.0568	0.0168	0.0405	0.0149	0.1062	0.0165	0.08446			0.0296	0.0103	0.0464	0.0116	-0.0072	0.0089	0.0134	0.0093	0.0147	0.0094	0.01938			-0.064	0.0206	0.0099	0.024	0.0777	0.0259	0.1072	0.023	0.1952
	VAL-235	-0.22	0.0112	-0.3187	0.0153	-0.1383	0.012	-0.1512	0.0139	-0.2169	0.0131	-0.20902			0.0373	0.0072	0.0388	0.0045	-0.0035	0.0076	0.0453	0.0052	0.002	0.0117	0.02398			-0.0429	0.014	-0.0205	0.0125	-0.0322	0.0158	-0.0428	0.0147	-0.0053	0.0165	-0.02874			-0.2264	0.0189	-0.3011	0.0202	-0.1729	0.0203	-0.1493	0.0188	-0.2194
	SER-236	-0.4897	0.0083	-0.5946	0.0114	-0.5412	0.0128	-0.6809	0.0119	-0.6207	0.0108	-0.58542			0.1372	0.0373	0.1891	0.0364	0.1893	0.0438	0.2305	0.0415	0.2153	0.035	0.19228			-0.0081	0.0096	0.0013	0.0081	-0.0019	0.0089	-0.0171	0.0096	-0.0087	0.0077	-0.0069			-0.3611	0.0385	-0.4021	0.0381	-0.3529	0.0465	-0.4673	0.0449	-0.4147
	PRO-237	-0.2095	0.0045	-0.2345	0.0054	-0.2903	0.0036	-0.3031	0.0045	-0.301	0.004	-0.26768			-0.0156	0.0056	-0.0063	0.0074	-0.0117	0.0067	-0.024	0.0045	-0.0124	0.0064	-0.014			-0.0606	0.019	0.0029	0.0174	-0.0109	0.0193	-0.0442	0.0153	-0.0311	0.0152	-0.02878			-0.2859	0.0191	-0.2382	0.0196	-0.3134	0.0208	-0.3719	0.017	-0.345
	ARG-238	-21.6699	0.0783	-23.6511	0.0837	-23.0833	0.0911	-23.602	0.0998	-21.8875	0.0782	-22.7788			0.2203	0.0518	0.3785	0.055	0.3552	0.0548	0.1631	0.0452	0.1311	0.0416	0.24964			-0.0304	0.0138	-0.0026	0.0126	-0.0057	0.0124	-0.0534	0.0129	-0.0311	0.0144	-0.02464			-21.4774	0.0905	-23.2746	0.1047	-22.7415	0.1077	-23.4912	0.1101	-21.7912
	LYS-239	-27.4701	0.1105	-30.9753	0.1724	-28.3859	0.1395	-31.5545	0.1739	-28.7497	0.1823	-29.4271			1.1386	0.1497	1.0032	0.1334	0.9225	0.1337	1.0918	0.1391	1.2975	0.139	1.09072			-0.0215	0.011	0.0075	0.01	-0.0503	0.0159	-0.0509	0.0187	0.0016	0.0181	-0.02272			-26.3505	0.1956	-29.9766	0.2047	-27.5094	0.196	-30.5217	0.228	-27.4493
	LEU-240	-0.3726	0.007	-0.408	0.0074	-0.4849	0.0059	-0.5058	0.0062	-0.516	0.0068	-0.45746			0.0165	0.0053	0.0061	0.0033	0.0153	0.0033	0.0049	0.0024	0.0331	0.0053	0.01518			-0.0315	0.0173	0.0071	0.0146	-0.0429	0.0186	-0.0798	0.0168	-0.016	0.0204	-0.03262			-0.3875	0.0183	-0.3943	0.016	-0.5131	0.02	-0.5806	0.0184	-0.4996
	SER-241	-0.3143	0.0071	-0.2682	0.0068	-0.3979	0.0089	-0.396	0.0076	-0.3716	0.0067	-0.3496			0.0233	0.0156	-0.0302	0.0182	0.0338	0.0134	0.0014	0.0038	0.0197	0.0041	0.0096			0.0105	0.0063	0.0129	0.0084	-0.0032	0.0079	-0.014	0.0037	-0.0104	0.0047	-0.00084			-0.2808	0.0174	-0.2851	0.0205	-0.3676	0.0188	-0.4083	0.0088	-0.3619
	ASN-242	0.033	0.0155	-0.0837	0.03	-0.1981	0.0285	-0.1207	0.0238	-0.4085	0.0383	-0.1556			0.5206	0.0575	0.3243	0.0574	0.4119	0.0583	0.3801	0.0487	0.4341	0.0514	0.4142			0.0002	0.0112	-0.0013	0.0125	-0.0237	0.0137	-0.0396	0.0096	-0.0182	0.0114	-0.01652			0.5535	0.0607	0.237	0.0667	0.1919	0.0635	0.2198	0.0522	0.0063
	ILE-243	-0.5573	0.0078	-0.569	0.0081	-0.5882	0.0061	-0.6695	0.0067	-0.5882	0.0066	-0.59444			0.0391	0.0069	0.018	0.0052	0.0435	0.0055	0.036	0.0059	0.0273	0.0063	0.03278			-0.0138	0.0151	0.0121	0.0137	0.0116	0.0153	0.0029	0.0127	0.0007	0.0108	0.0027			-0.533	0.0182	-0.5392	0.0175	-0.5335	0.0179	-0.6302	0.0163	-0.5602
	ILE-244	-0.7238	0.0065	-0.7328	0.008	-0.6973	0.0052	-0.7993	0.0061	-0.7163	0.0051	-0.7339			0.1649	0.0153	0.1799	0.0194	0.1374	0.0166	0.1177	0.0134	0.1361	0.0184	0.1472			0.0222	0.0205	-0.009	0.0198	0.071	0.0207	0.0531	0.0204	0.0235	0.0227	0.03216			-0.5366	0.0264	-0.5619	0.0276	-0.4896	0.0266	-0.627	0.0254	-0.5572
	GLN-245	-0.0794	0.0159	-0.204	0.0268	-0.4325	0.0249	-0.2068	0.016	-0.1787	0.0178	-0.22028			0.4538	0.0512	0.5881	0.0643	0.4259	0.0564	0.5404	0.0496	0.5303	0.0477	0.5077			-0.0016	0.0078	-0.0016	0.0085	0.0025	0.0097	-0.0023	0.0109	-0.0046	0.0084	-0.00152			0.3734	0.0497	0.3835	0.0695	-0.0069	0.0629	0.3323	0.0551	0.3459
	LEU-246	-0.3928	0.0094	-0.3804	0.0108	-0.492	0.01	-0.5853	0.0132	-0.4205	0.0096	-0.4542			0.1986	0.0232	0.2117	0.0216	0.1495	0.0242	0.1658	0.0258	0.0828	0.0218	0.16168			0.0182	0.014	0.0108	0.0156	0.0419	0.0144	0.0253	0.0126	0.024	0.0139	0.02404			-0.1758	0.0281	-0.1581	0.0283	-0.3	0.0299	-0.3953	0.0312	-0.3128
	ALA-247	-0.2908	0.0134	-0.4462	0.01	-0.2322	0.0077	-0.2893	0.0095	-0.28	0.0139	-0.3077			0.1425	0.0185	0.1825	0.0215	0.1138	0.0209	0.0976	0.0201	0.0863	0.0191	0.12454			-0.0058	0.0146	-0.0019	0.013	0.0079	0.0104	0.0179	0.0108	0.0011	0.0111	0.00384			-0.1536	0.0261	-0.2651	0.0263	-0.1099	0.0251	-0.1724	0.0258	-0.1946
	ASP-248	12.9013	0.2206	15.6208	0.2282	11.1455	0.1471	10.7034	0.17	11.3633	0.2096	12.3469			1.1909	0.1297	1.4706	0.1344	1.5949	0.1393	1.3946	0.1156	1.8266	0.114	1.49552			0.007	0.0117	0.0084	0.0095	0.05	0.0115	0.0072	0.0108	0	0.0098	0.01452			14.0957	0.2521	17.1154	0.2375	12.7882	0.1897	12.099	0.1801	13.1948
	LYS-249	-3.3745	0.2073	-4.7245	0.2275	-3.3927	0.1289	-4.7868	0.1354	-3.9786	0.1891	-4.05142			1.6494	0.198	1.5772	0.1988	1.2679	0.1863	1.1622	0.1546	2.007	0.172	1.53274			0.0091	0.0106	0.0358	0.0147	-0.0216	0.0174	-0.0138	0.0158	0.0011	0.0135	0.00212			-1.7242	0.3054	-3.109	0.3073	-2.1441	0.2227	-3.6455	0.2095	-1.9549
SicA	GLU-9	-6.3698	0.6515	-6.1426	1.2877	-31.688	1.4718	-25.2369	1.8947	-14.8644	2.0982	-16.8603			5.5397	0.6871	10.0721	1.2132	38.3242	2.4563	35.1522	2.4187	23.205	2.3457	22.4586			-0.0922	0.0172	-0.3173	0.0283	-0.7221	0.0424	-0.7544	0.0455	-0.587	0.0457	-0.4946			-0.9182	0.4101	3.6414	0.8498	5.8962	1.1771	9.1766	0.9677	7.699
	GLU-10	-70.2207	0.9534	-102.71	1.2786	-59.7066	0.9638	-112.091	1.9648	-116.493	1.8955	-92.2444			1.075	0.9363	28.2716	1.8962	-4.0038	0.3927	44.5166	2.5331	40.9423	2.7453	22.1603			-0.2114	0.0169	-0.3817	0.0279	-0.118	0.014	-0.8806	0.0488	-0.5913	0.0379	-0.4366			-69.3403	0.5222	-74.7668	1.1072	-63.8226	0.7941	-68.4093	1.0627	-76.1437
	ARG-11	62.2673	0.9945	59.6776	0.7604	37.1673	1.3558	32.1202	1.1088	49.1349	1.0087	48.0735			14.1687	0.8502	2.7553	0.6283	13.0006	1.4338	22.5616	1.3286	12.5487	1.3353	13.007			-0.6115	0.0208	-0.6935	0.0192	-0.2954	0.0364	-0.4957	0.0315	-0.2885	0.03	-0.47692			75.8848	0.5704	61.7324	0.3857	49.9271	0.6003	54.2594	0.6316	61.3638
	VAL-12	-20.907	0.2248	-24.2039	0.2147	-13.8825	0.2651	-17.5799	0.2797	-14.4431	0.2826	-18.2033			13.0865	0.1775	13.6029	0.1734	3.5799	0.2011	7.0058	0.2486	3.9922	0.1903	8.25346			-2.0666	0.027	-2.4527	0.0216	-1.6799	0.032	-1.973	0.0239	-1.7006	0.0349	-1.97456			-9.8908	0.1881	-13.0489	0.166	-11.9873	0.1625	-12.5511	0.1641	-12.1533
	ALA-13	-19.0011	0.1514	-19.893	0.1996	-9.3362	0.1516	-9.5679	0.1392	-9.2439	0.124	-13.4084			16.2129	0.162	15.7317	0.2042	8.2564	0.1111	8.7255	0.0971	9.4695	0.0995	11.6792			-0.4083	0.0128	-0.3496	0.0116	-0.9428	0.0171	-0.8625	0.0147	-0.8566	0.0159	-0.68396			-3.2041	0.1371	-4.4885	0.1474	-2.0197	0.1521	-1.7046	0.1515	-0.6227
	GLU-14	-120.848	0.8706	-116.16	1.3371	-94.2752	1.0923	-87.059	1.0245	-86.9921	0.9874	-101.067			61.1378	1.6559	64.3982	2.235	39.9394	1.4569	30.4647	1.5775	26.3414	1.2704	44.4563			-1.1194	0.0282	-1.1256	0.0288	-0.6818	0.0229	-0.7395	0.0217	-0.5477	0.0208	-0.8428			-60.9297	0.9691	-52.8159	1.1305	-55.0565	0.7131	-57.3576	0.7235	-61.1634
	MET-15	-25.5321	0.3428	-25.3027	0.2988	-27.6404	0.2424	-28.3865	0.233	-28.4111	0.1974	-27.0546			13.8925	0.3091	14.8571	0.2844	19.4938	0.1998	22.7285	0.2669	19.129	0.1471	18.0202			-2.223	0.0288	-1.9457	0.0277	-1.9806	0.0266	-2.2847	0.028	-1.9013	0.0211	-2.06706			-13.8456	0.1845	-12.3887	0.172	-10.1174	0.1937	-7.9649	0.2058	-11.1876
	ILE-16	-8.1944	0.242	-11.2708	0.2409	-12.1827	0.3689	-1.3025	0.0986	-16.2109	0.1551	-9.83226			4.4197	0.2551	7.2033	0.2119	9.5108	0.2354	3.589	0.1313	9.9199	0.098	6.92854			-1.1274	0.0252	-1.1703	0.0173	-0.9298	0.0226	-0.281	0.0234	-1.0868	0.0178	-0.91906			-4.9018	0.1614	-5.2458	0.1469	-3.601	0.2042	2.0051	0.1384	-7.3839
	TRP-17	-12.9402	0.1988	-12.8314	0.178	-7.0912	0.2248	-8.994	0.1801	-6.8424	0.1788	-9.73984			4.1594	0.1325	3.8821	0.1096	2.4776	0.1755	4.9553	0.1882	2.6793	0.1534	3.63074			-0.2671	0.0153	-0.1569	0.0159	-1.0234	0.0304	-1.318	0.033	-0.9589	0.0318	-0.74486			-9.0469	0.1364	-9.1019	0.1134	-5.6506	0.1708	-5.3458	0.1588	-5.1161
	ASP-18	-102.305	1.4595	-98.7684	0.8037	-53.12	0.478	-94.3149	0.9739	-60.9087	0.6708	-81.8833			37.2796	2.3442	16.1758	0.9487	6.1157	0.2307	69.0507	1.8427	9.1146	0.2821	27.5473			-1.4119	0.0489	-1.0886	0.0209	-0.0337	0.0124	-0.7251	0.0262	0.0216	0.008	-0.64754			-66.4381	1.2064	-83.6631	0.6487	-47.0272	0.4586	-25.9459	1.0985	-51.8013
	ALA-19	-27.522	0.2594	-25.7901	0.2749	0.2913	0.052	-1.677	0.0647	-1.5733	0.1227	-11.2542			21.7013	0.2224	21.736	0.3214	0.013	0.0427	0.3935	0.0575	-0.1551	0.1181	8.73774			-1.0909	0.027	-0.6269	0.0222	-0.019	0.0107	0.009	0.0066	-0.2306	0.0163	-0.39168			-6.9139	0.2022	-4.6767	0.1796	0.283	0.0603	-1.2756	0.0566	-1.9578
	VAL-20	-17.0587	0.1757	-16.1318	0.1337	0.0354	0.059	0.6162	0.0662	-0.5834	0.0528	-6.62446			7.7039	0.1029	7.3843	0.1056	1.0171	0.0655	-0.5086	0.0497	-0.6751	0.0399	2.98432			-0.431	0.0222	-0.4262	0.0199	-0.1192	0.0182	-0.0929	0.0199	-0.0124	0.0137	-0.21634			-9.7892	0.1562	-9.1783	0.1252	0.9285	0.0623	0.0114	0.0659	-1.2727
	SER-21	-0.0604	0.1837	-1.2642	0.2938	-1.3404	0.1074	-2.1725	0.3902	-0.4146	0.1942	-1.05042			0.9203	0.239	2.799	0.3607	1.374	0.1137	5.8737	0.4938	2.4825	0.2509	2.6899			-0.1364	0.0158	-0.1912	0.0186	0.0075	0.008	-0.3631	0.0219	-0.2616	0.0202	-0.18896			0.7233	0.1386	1.3275	0.1503	0.039	0.0955	3.3299	0.1807	1.8085
	GLU-22	-30.7869	0.5089	-43.6911	0.7679	-27.3204	0.4228	-30.2339	0.447	-37.1154	0.7267	-33.8295			5.1922	0.208	8.396	0.4859	9.0444	0.2497	10.1436	0.368	11.7986	0.5322	8.91496			-0.0043	0.0108	-0.0239	0.0116	0.0186	0.0136	-0.0162	0.0108	0.0036	0.0112	-0.00444			-25.6031	0.5174	-35.3166	0.4931	-18.2599	0.3477	-20.0948	0.3333	-25.2801
	GLY-23	0.706	0.1072	3.1713	0.0916	0.796	0.178	2.1172	0.1064	1.0867	0.1257	1.57544			-0.7413	0.0879	-1.2202	0.1064	0.0269	0.1484	-1.2255	0.0998	-1.0312	0.1029	-0.83826			-0.1923	0.011	-0.0794	0.0104	-0.0474	0.0154	-0.1037	0.0129	-0.2319	0.0148	-0.13094			-0.2335	0.0928	1.8693	0.0812	0.7696	0.099	0.7887	0.097	-0.1732
	ALA-24	-1.4302	0.0888	1.9602	0.077	1.351	0.0951	1.5776	0.0693	-0.7242	0.122	0.54688			-0.1809	0.0777	-0.1565	0.0545	-0.2548	0.0548	-0.4413	0.0473	-0.3221	0.0544	-0.27112			-0.4691	0.0159	-0.0713	0.0171	-0.0624	0.0157	-0.0372	0.015	-0.359	0.019	-0.1998			-2.0831	0.1171	1.7305	0.0728	1.0297	0.0764	1.0937	0.067	-1.4093
	THR-25	-0.5897	0.0392	-0.7546	0.0326	-0.0387	0.063	0.0746	0.064	-0.7146	0.0308	-0.4046			0.2547	0.0512	0.3286	0.0408	0.279	0.0507	0.2442	0.0498	0.3698	0.0543	0.29526			0.0085	0.0076	0.0147	0.0091	0.0071	0.0102	0.0181	0.0088	0.0199	0.0105	0.01366			-0.3257	0.055	-0.4132	0.0488	0.2475	0.082	0.3377	0.0758	-0.322
	LEU-26	0.4868	0.0325	0.4967	0.032	0.7789	0.0359	1.0467	0.0265	0.633	0.0251	0.68842			-0.076	0.0189	-0.1142	0.0209	-0.133	0.024	-0.2131	0.0156	-0.2381	0.0203	-0.15488			0.003	0.0199	0.0343	0.0186	-0.0322	0.0195	-0.0148	0.0191	-0.01	0.0189	-0.00394			0.4142	0.0319	0.4164	0.0352	0.6145	0.0433	0.8171	0.0315	0.3826
	LYS-27	2.064	0.2791	4.9028	0.2355	4.5344	0.3292	3.0274	0.2649	7.3099	0.203	4.3677			0.0596	0.136	0.4015	0.1426	-0.341	0.1441	0.2984	0.1481	0.1288	0.137	0.10946			-0.0104	0.0134	-0.0029	0.0154	0.0325	0.0139	0.0186	0.0146	0.0074	0.0146	0.00904			2.1143	0.2937	5.2899	0.2586	4.2228	0.3332	3.3255	0.2913	7.4497
	ASP-28	-12.1074	0.2251	-16.8186	0.2368	-14.2599	0.3522	-12.9377	0.2752	-18.5088	0.2234	-14.9265			1.3279	0.1279	1.7021	0.133	2.0652	0.1556	1.6279	0.1693	2.4475	0.148	1.83412			-0.001	0.0058	0.007	0.0057	0.0171	0.0062	0.0063	0.0055	0.005	0.0055	0.00688			-10.7841	0.2468	-15.1012	0.2388	-12.1516	0.3196	-11.305	0.2826	-16.0464
	VAL-29	0.0342	0.0556	0.6838	0.0379	1.2865	0.0392	1.0382	0.035	0.6008	0.037	0.7287			-0.3413	0.031	-0.3016	0.0315	-0.3916	0.0327	-0.2394	0.0314	-0.4743	0.0307	-0.34964			-0.0706	0.0159	0.0024	0.0147	-0.0262	0.0132	-0.0132	0.016	-0.0236	0.0134	-0.02624			-0.3758	0.0691	0.3834	0.0488	0.8703	0.0507	0.7873	0.047	0.1009
	HIS-30	-0.9712	0.1537	0.2832	0.1473	-0.568	0.2179	-1.527	0.1271	-0.3466	0.1206	-0.62592			-0.5166	0.0817	-0.9282	0.0917	-0.971	0.1089	-0.6226	0.0731	-1.2225	0.0761	-0.85218			-0.0354	0.0138	-0.0044	0.0139	-0.015	0.0115	-0.0371	0.0129	-0.038	0.0127	-0.02598			-1.5183	0.125	-0.656	0.1309	-1.5538	0.1736	-2.1932	0.1207	-1.6007
	GLY-31	-0.3645	0.0429	0.0221	0.0351	-0.5055	0.041	-0.6038	0.0367	-0.223	0.0338	-0.33494			0.2365	0.0389	0.3779	0.039	0.3127	0.0408	0.3048	0.0348	0.3013	0.0386	0.30664			0.0048	0.0071	-0.009	0.0077	0.0048	0.0078	0.0041	0.0083	0.0053	0.0069	0.002			-0.1231	0.0564	0.3905	0.0507	-0.1859	0.0594	-0.296	0.0526	0.0818
	ILE-32	-0.8163	0.0247	-0.6469	0.0192	-0.7969	0.0229	-0.8464	0.021	-0.699	0.0212	-0.7611			0.2767	0.0234	0.2527	0.0249	0.2005	0.0263	0.2624	0.0254	0.2402	0.0256	0.2465			-0.0351	0.0202	0.0425	0.0221	-0.0343	0.0216	-0.0331	0.0219	-0.0134	0.0196	-0.01468			-0.5733	0.0437	-0.3514	0.0384	-0.6317	0.0392	-0.6184	0.0392	-0.4719
	PRO-33	0.7165	0.0078	0.7023	0.0086	0.6294	0.0088	0.7425	0.0069	0.6519	0.008	0.68852			-0.0761	0.0067	-0.038	0.0059	0.0023	0.0074	-0.0339	0.0066	0.0333	0.0065	-0.02248			0.0197	0.0117	0.0036	0.0098	0.0091	0.0127	-0.007	0.0105	-0.0108	0.0101	0.00292			0.6602	0.015	0.6679	0.0136	0.6407	0.0166	0.7017	0.0145	0.6749
	GLN-34	0.5662	0.0449	0.6243	0.0455	0.5197	0.0457	0.2806	0.0398	0.0346	0.0359	0.40508			0.129	0.0773	0.4284	0.0777	0.4584	0.0847	0.2907	0.075	0.726	0.084	0.4065			-0.0049	0.0089	-0.0014	0.0123	-0.0017	0.0109	0.0104	0.0094	-0.0029	0.0094	-0.0001			0.6925	0.0826	1.052	0.0917	0.9755	0.0875	0.5807	0.082	0.7631
	ASP-35	10.7042	0.2388	8.5753	0.2258	9.4196	0.1729	9.6151	0.1953	6.5522	0.2047	8.97328			0.9716	0.1308	1.0736	0.1473	1.577	0.1346	1.4011	0.1442	1.584	0.1422	1.32146			0.0041	0.0075	-0.0066	0.0118	0.0276	0.008	0.0092	0.0078	0.0105	0.009	0.00896			11.6639	0.291	9.6407	0.2717	11.0237	0.1954	11.0232	0.2532	8.1414
	MET-36	0.6203	0.0532	0.2267	0.019	0.6051	0.0495	0.6798	0.0532	0.5184	0.037	0.53006			-0.1626	0.0245	-0.0339	0.0186	-0.0278	0.0243	-0.1648	0.0219	-0.0136	0.0243	-0.08054			0.026	0.0161	0.0075	0.0105	0.0134	0.0158	-0.0148	0.0152	0.004	0.0139	0.00722			0.4851	0.0587	0.2007	0.0286	0.5917	0.0606	0.5026	0.0584	0.507
	MET-37	0.3882	0.0255	0.279	0.0273	0.2009	0.0317	0.4377	0.0371	0.3333	0.0304	0.32782			-0.2518	0.0198	-0.1788	0.0186	-0.0402	0.0217	-0.208	0.0192	-0.1063	0.0202	-0.15702			0.0112	0.0162	-0.0353	0.0153	0.0252	0.0178	-0.026	0.0189	0.0056	0.0176	-0.00386			0.1496	0.0337	0.0657	0.0322	0.1853	0.036	0.2054	0.0419	0.2329
	ASP-38	8.2279	0.1997	7.5272	0.2001	6.3308	0.1848	8.5942	0.1728	5.119	0.185	7.15982			-0.2855	0.1389	0.2497	0.1439	0.6269	0.1649	-0.0054	0.1587	0.6871	0.1431	0.25456			-0.0036	0.0076	-0.0044	0.0087	-0.0032	0.0082	-0.0101	0.0077	-0.0073	0.0069	-0.00572			7.9281	0.226	7.7643	0.2285	6.9522	0.2468	8.5925	0.2255	5.8066
	GLY-39	0.7971	0.0161	0.8775	0.0173	0.7552	0.0174	0.8946	0.016	0.8471	0.0152	0.8343			-0.3904	0.0157	-0.3327	0.0163	-0.3569	0.0137	-0.3681	0.0149	-0.3051	0.0117	-0.35064			0.0015	0.0039	-0.003	0.0066	0.0008	0.0048	-0.0046	0.0054	0.0011	0.0051	-0.00084			0.4082	0.0205	0.5406	0.0196	0.3982	0.0185	0.5217	0.0187	0.5437
	LEU-40	1.3023	0.0157	1.3674	0.0166	1.2484	0.0171	1.4329	0.0164	1.3406	0.0137	1.33832			-0.8208	0.0151	-0.7188	0.0126	-0.6482	0.0121	-0.7707	0.0126	-0.5978	0.0125	-0.71126			-0.0006	0.0179	0.0067	0.0223	-0.0183	0.0214	-0.0335	0.0213	0.0352	0.0206	-0.0021			0.4824	0.0253	0.6553	0.0288	0.5806	0.0262	0.6287	0.0258	0.7786
	TYR-41	0.5545	0.0249	0.4834	0.0222	0.7162	0.0304	0.6803	0.0252	0.5438	0.023	0.59564			-0.0548	0.0396	0.1876	0.0468	-0.0768	0.0484	0.0794	0.0428	0.1691	0.0429	0.0609			0.0201	0.0152	0.0164	0.0147	-0.0223	0.0126	-0.0471	0.0178	0.0039	0.0161	-0.0058			0.5195	0.0507	0.6868	0.0539	0.6154	0.0517	0.7123	0.0497	0.7157
	ALA-42	0.3781	0.0147	0.4529	0.0146	0.4192	0.0147	0.4103	0.014	0.4895	0.0117	0.43			-0.3325	0.0142	-0.2957	0.0212	-0.3203	0.0246	-0.3556	0.023	-0.2123	0.0266	-0.30328			-0.0073	0.006	-0.0069	0.0074	0.0116	0.0086	-0.0039	0.0061	-0.0032	0.0074	-0.00194			0.0388	0.019	0.1487	0.0247	0.1096	0.0265	0.0503	0.0229	0.2723
	HIS-43	-2.8833	0.058	-0.9836	0.1205	0.4807	0.1442	-1.2565	0.1484	1.5935	0.0997	-0.60984			0.7224	0.0764	0.134	0.0825	-0.5674	0.0871	0.002	0.0905	-0.7182	0.0673	-0.08544			-0.0001	0.0095	-0.0114	0.0106	-0.019	0.0091	-0.0137	0.0108	-0.0138	0.0088	-0.0116			-2.1622	0.0713	-0.8564	0.1105	-0.1097	0.1017	-1.2719	0.1229	0.8608
	ALA-44	1.2475	0.0228	1.3021	0.0237	1.3802	0.0222	1.2947	0.0226	1.3871	0.0203	1.32232			-0.6776	0.0111	-0.6906	0.0087	-0.7233	0.0106	-0.7133	0.0089	-0.5786	0.0093	-0.67668			-0.0095	0.0132	-0.0686	0.0168	-0.0109	0.0114	0.0054	0.0151	0.0338	0.0167	-0.00996			0.5598	0.021	0.542	0.0245	0.6464	0.0196	0.5862	0.0236	0.8398
	TYR-45	0.2501	0.0299	0.3543	0.025	0.4288	0.024	0.1618	0.0291	0.4481	0.0254	0.32862			-0.087	0.0563	0.1767	0.0533	-0.0841	0.0456	0.0614	0.0587	0.1517	0.0566	0.04374			-0.0132	0.0116	0.0061	0.0113	0.0127	0.011	0.0165	0.0101	0.0092	0.0119	0.00626			0.1512	0.0594	0.5415	0.0575	0.3588	0.052	0.242	0.0575	0.6115
	GLU-46	21.245	0.2003	23.1155	0.2053	21.9679	0.2349	23.7572	0.2371	21.5779	0.2347	22.3327			-1.8933	0.1535	-1.7542	0.158	-1.9115	0.1549	-1.9517	0.1628	-0.9824	0.1548	-1.69862			-0.0068	0.0112	-0.0089	0.0122	-0.0022	0.0106	0.0175	0.0142	-0.0112	0.0094	-0.00232			19.3282	0.2282	21.3348	0.2391	20.0423	0.2508	21.8121	0.234	20.5683
	PHE-47	0.2523	0.0346	0.3709	0.0303	0.6911	0.0331	0.2552	0.0354	0.7151	0.0289	0.45692			-0.2921	0.0178	-0.4415	0.0202	-0.5086	0.0318	-0.4557	0.0196	-0.4134	0.029	-0.42226			0.0287	0.0107	-0.0094	0.0097	0.0038	0.0116	0.0155	0.009	0.0558	0.0133	0.01888			-0.0117	0.025	-0.0811	0.0212	0.1868	0.0298	-0.1854	0.0239	0.3568
	TYR-48	-0.4337	0.0436	-0.3678	0.0512	0.9337	0.0461	-0.1384	0.0604	0.3418	0.0417	0.06712			0.3176	0.0479	0.2526	0.0528	-0.1393	0.0411	0.1319	0.0562	0.3423	0.0507	0.18102			-0.0186	0.0119	0.0094	0.0121	0.0043	0.0119	0.0152	0.0143	-0.0063	0.015	0.0008			-0.1322	0.0502	-0.102	0.0578	0.7986	0.0466	0.0082	0.0652	0.6754
	ASN-49	0.3878	0.0527	0.3173	0.0606	0.5436	0.0513	0.1676	0.0634	0.5726	0.0482	0.39778			0.1601	0.0773	0.4245	0.0782	0.4462	0.0883	0.4112	0.0796	0.807	0.0852	0.4498			0.0139	0.0107	0.0088	0.0106	-0.0067	0.0119	0.0125	0.0104	0.0112	0.0091	0.00794			0.5634	0.0904	0.7522	0.09	0.9821	0.0836	0.5865	0.1008	1.3928
	GLN-50	-1.2169	0.1145	-1.2517	0.1186	1.3341	0.0917	-0.5758	0.1169	1.2083	0.066	-0.1004			0.7821	0.0825	0.9092	0.0766	0.3098	0.0905	0.6442	0.0996	0.1446	0.0801	0.55798			0.0311	0.0112	0.0107	0.0088	-0.0182	0.0114	0.0049	0.0114	-0.0103	0.0118	0.00364			-0.3914	0.1314	-0.3269	0.1481	1.6229	0.1088	0.0812	0.1258	1.3393
	GLY-51	-0.4562	0.0566	-0.1054	0.0704	0.2584	0.0576	0.0101	0.074	0.5873	0.0469	0.05884			1.2079	0.0389	1.07	0.0502	0.4482	0.0469	0.9832	0.0532	0.3141	0.0449	0.80468			0.0018	0.0098	0.0071	0.0094	-0.0021	0.0085	-0.0158	0.0103	0.009	0.0069	0			0.7563	0.0422	0.9697	0.0499	0.7027	0.0572	0.9732	0.0435	0.9111
	ARG-52	-28.1637	0.234	-29.8689	0.2703	-31.6596	0.2472	-30.706	0.2676	-30.3809	0.2622	-30.1558			3.8509	0.0955	4.1275	0.1034	4.719	0.0984	3.7664	0.1065	4.6518	0.0843	4.22312			0.0366	0.0129	0.0089	0.0125	-0.0163	0.0111	0.0004	0.0142	-0.0066	0.0096	0.0046			-24.2701	0.2285	-25.7428	0.2173	-26.9604	0.2135	-26.938	0.2452	-25.744
	LEU-53	-1.6429	0.0845	-2.4483	0.1385	-0.0366	0.1227	-1.7041	0.1058	-0.3407	0.1046	-1.23452			-0.0581	0.055	0.7777	0.1421	1.7853	0.1351	0.1019	0.0729	1.9727	0.13	0.9159			-0.1464	0.0163	-0.2579	0.0198	-0.1875	0.015	-0.1527	0.0181	-0.2127	0.0139	-0.19144			-1.8472	0.0972	-1.9262	0.1107	1.5657	0.0785	-1.7558	0.1078	1.4155
	ASP-54	39.0878	0.3068	38.2035	0.3316	38.6298	0.3669	41.5716	0.3476	36.3214	0.3484	38.7628			-4.4195	0.3295	-1.1636	0.3789	-3.7761	0.2547	-3.3825	0.3012	-3.2882	0.2371	-3.20598			-0.4388	0.0201	-0.5412	0.0225	-0.5835	0.0232	-0.4451	0.0212	-0.6888	0.0184	-0.53948			34.2348	0.3284	36.4675	0.3412	34.2586	0.3327	37.7511	0.3742	32.3465
	GLU-55	27.9755	0.4953	29.8472	0.4959	35.8779	0.6329	32.2065	0.5443	24.2389	0.5502	30.0292			30.1045	0.5707	28.6249	0.5543	28.1044	0.7745	28.9045	0.5497	32.6975	0.561	29.6872			-1.7001	0.0178	-1.6652	0.0171	-1.6587	0.0225	-1.6794	0.019	-1.6384	0.0168	-1.66836			56.3655	0.5494	56.8083	0.4681	62.3265	0.6114	59.4311	0.537	55.293
	ALA-56	-7.2796	0.1652	-6.2781	0.1371	-5.8547	0.1218	-6.6528	0.1243	-6.6726	0.1379	-6.54756			2.3419	0.1463	1.275	0.1112	1.5228	0.1299	1.8622	0.1022	0.8711	0.1197	1.5746			-0.1242	0.0149	-0.0997	0.0135	-0.1061	0.0123	-0.1012	0.0151	-0.1018	0.0153	-0.1066			-5.0691	0.1161	-5.1016	0.1031	-4.4442	0.1028	-4.8942	0.0965	-5.9063
	GLU-57	77.6803	0.8217	67.7257	0.6308	70.4403	1.0615	72.1969	0.6181	60.5538	0.5311	69.7194			0.7168	1.0925	15.9105	0.8075	3.9294	1.2302	11.1786	0.7174	27.4703	0.8834	11.8411			-1.1442	0.0159	-1.1229	0.0173	-1.0216	0.016	-1.1068	0.014	-1.1138	0.0177	-1.10186			77.2868	0.6341	82.532	0.6002	73.3781	0.7687	82.2506	0.5714	86.9059
	THR-58	-2.3468	0.1014	-2.7069	0.1045	-2.4034	0.1242	-2.1212	0.0949	-2.0062	0.1072	-2.3169			-0.6051	0.0925	0.0541	0.0742	-0.4243	0.0907	-0.2356	0.0698	-0.2372	0.0734	-0.28962			-0.0409	0.0156	-0.0208	0.0147	-0.0509	0.0133	-0.0387	0.014	-0.036	0.0131	-0.03746			-2.9929	0.0726	-2.671	0.0706	-2.8712	0.1141	-2.3965	0.0651	-2.28
	PHE-59	-3.232	0.0399	-3.5063	0.0487	-3.3831	0.0459	-3.1146	0.0443	-3.2935	0.0442	-3.3059			1.2881	0.0272	1.4614	0.0306	1.5737	0.0336	1.37	0.0252	1.4224	0.0251	1.42312			-0.036	0.0144	-0.0328	0.0143	0.013	0.013	0.0081	0.0149	-0.0264	0.0137	-0.01482			-1.981	0.0264	-2.0748	0.029	-1.7996	0.03	-1.739	0.0302	-1.899
	PHE-60	-7.2547	0.1433	-6.8783	0.1267	-7.2134	0.1203	-5.7115	0.0898	-7.3013	0.1259	-6.87184			3.9067	0.0856	3.4458	0.0995	3.6887	0.1048	2.8895	0.0643	4.0577	0.0846	3.59768			-0.0139	0.014	-0.0516	0.0157	-0.0546	0.0147	-0.034	0.0178	-0.1741	0.0204	-0.06564			-3.3589	0.0778	-3.4831	0.0552	-3.5806	0.0662	-2.8542	0.0504	-3.4153
	ARG-61	-137.607	0.9623	-145.786	0.8322	-146.002	0.9736	-150.614	0.8288	-140.559	0.7446	-144.114			110.1	0.9163	119.022	0.916	118.326	0.966	122.858	0.7958	115.413	0.8414	117.144			-2.1135	0.0274	-2.2023	0.0297	-2.2323	0.0281	-2.2492	0.0262	-2.2513	0.0267	-2.20972			-29.6865	0.4092	-28.9943	0.3974	-29.9055	0.4426	-30.0287	0.4191	-27.3564
	PHE-62	-4.8928	0.0624	-4.5487	0.0686	-4.5536	0.0591	-3.7058	0.0557	-4.147	0.0533	-4.36958			2.6589	0.0339	2.3047	0.0442	2.4203	0.0411	2.1225	0.0373	2.3495	0.0371	2.37118			0.0101	0.0174	0.024	0.0164	-0.0107	0.0167	0.0184	0.0144	-0.0057	0.0165	0.00722			-2.2275	0.0456	-2.2224	0.0436	-2.1453	0.052	-1.5665	0.0417	-1.8039
	LEU-63	-7.7682	0.0424	-7.1382	0.0525	-7.4689	0.0498	-7.3027	0.048	-7.2873	0.0516	-7.39306			4.4542	0.0349	3.3879	0.0384	3.7948	0.0398	3.812	0.0428	3.8272	0.0401	3.85522			0.0173	0.0162	0.0485	0.0197	-0.0292	0.0162	0.0219	0.0185	0.0192	0.016	0.01554			-3.2959	0.0291	-3.7014	0.0328	-3.7037	0.0342	-3.4695	0.0335	-3.4421
	CYS-64	-16.4634	0.2874	-17.9973	0.5774	-21.3216	0.467	-17.3701	0.2885	-16.5841	0.2546	-17.9473			12.164	0.2107	12.9652	0.4782	15.6794	0.4074	13.6025	0.2683	14.122	0.2111	13.7066			-0.7512	0.0193	-0.5635	0.0277	-0.6841	0.0346	-0.4922	0.0199	-0.9424	0.0245	-0.68668			-5.0598	0.1468	-5.6275	0.1901	-6.3157	0.2066	-4.2739	0.1515	-3.3987
	ILE-65	-16.2122	0.1232	-12.5125	0.1539	-12.9619	0.2377	-12.0018	0.1793	-14.8308	0.2032	-13.7038			7.8232	0.1185	4.8693	0.1534	5.7533	0.3107	5.3631	0.2149	6.5054	0.1704	6.06286			-0.8112	0.016	-0.469	0.0248	-0.4534	0.0243	-0.4207	0.022	-0.694	0.0215	-0.56966			-9.1972	0.104	-8.1204	0.1078	-7.6577	0.1197	-7.0665	0.0844	-9.0317
	TYR-66	-10.87	0.1652	-10.0297	0.1909	-10.1184	0.1869	-9.8091	0.1924	-12.6347	0.2202	-10.6924			11.0321	0.132	9.3742	0.2026	10.3364	0.2135	10.7081	0.1985	10.9282	0.1744	10.4758			-0.1817	0.0126	-0.1152	0.0127	-0.1874	0.0117	-0.1512	0.0116	-0.1727	0.0126	-0.16164			-0.0236	0.1327	-0.7673	0.1183	0.0275	0.1133	0.765	0.1294	-1.8856
	ASP-67	-89.6108	0.6497	-86.9926	1.3485	-82.0054	1.2914	-88.9616	1.0707	-100.436	0.7505	-89.6013			84.3233	1.1539	61.1937	1.8688	59.4229	1.8385	87.464	1.9116	104.077	1.1428	79.2962			-0.7366	0.0125	-0.5378	0.0149	-0.4737	0.0211	-0.7878	0.0221	-0.8271	0.014	-0.6726			-6.0453	0.7799	-26.3775	0.7548	-23.0248	0.8898	-2.39	1.0877	2.854
	PHE-68	-2.8101	0.1617	-2.0841	0.2241	-0.5595	0.1942	-0.5079	0.125	-2.6311	0.1545	-1.71854			-2.1438	0.1226	-0.827	0.1455	-1.3926	0.1374	-3.5177	0.1113	-2.6779	0.1047	-2.1118			-0.6122	0.0184	-0.4509	0.0263	-0.4859	0.0284	-0.4916	0.0172	-0.5516	0.0181	-0.51844			-5.5598	0.0936	-3.3542	0.1797	-2.4397	0.1488	-4.5136	0.0999	-5.8514
	TYR-69	1.8891	0.0595	1.8724	0.0724	3.0758	0.0788	2.8651	0.0658	3.3672	0.0577	2.61392			-1.5918	0.0934	-1.8855	0.1171	-1.8329	0.0707	-2.4558	0.0855	-2.4153	0.0697	-2.03626			-0.0321	0.0135	0.0207	0.0165	-0.0184	0.016	-0.0175	0.015	-0.0239	0.0127	-0.01424			0.2639	0.0928	0.0069	0.0925	1.2229	0.0859	0.394	0.0813	0.9287
	ASN-70	4.0551	0.0693	3.7394	0.0777	3.0804	0.065	5.0122	0.072	3.5875	0.0643	3.89492			-0.5409	0.0745	0.0088	0.0703	-0.2014	0.0557	-0.9296	0.0677	0.0593	0.0691	-0.32076			-0.0039	0.0061	-0.007	0.0054	-0.004	0.0046	-0.0052	0.0046	0.0077	0.0056	-0.00248			3.5062	0.0561	3.7442	0.058	2.8719	0.0478	4.0772	0.0562	3.6498
	PRO-71	1.6878	0.0136	1.6902	0.0159	1.5649	0.0162	1.8727	0.0124	1.5798	0.0147	1.67908			-0.8379	0.0172	-0.6204	0.0214	-0.694	0.0159	-0.9282	0.0241	-0.5758	0.0243	-0.73126			-0.0057	0.0084	0.0008	0.0091	0.0106	0.0108	0.0104	0.01	0.0148	0.0079	0.00618			0.8435	0.0197	1.0694	0.0206	0.8814	0.0169	0.9555	0.0246	1.0164
	ASP-72	2.2836	0.233	-1.9044	0.2401	-0.8299	0.2182	0.8314	0.2289	-3.0904	0.2037	-0.54194			0.1442	0.1504	1.7005	0.1654	2.2886	0.178	1.2043	0.151	3.9308	0.1595	1.85368			0.0048	0.015	0.0053	0.0107	-0.0238	0.0122	-0.032	0.0133	-0.0002	0.0118	-0.00918			2.4454	0.2035	-0.1936	0.2389	1.442	0.194	1.9907	0.2188	0.8485
	TYR-73	-6.7467	0.2673	-3.5983	0.3582	-3.1825	0.2892	-1.3464	0.297	-6.4455	0.2467	-4.26388			7.1037	0.2151	7.5615	0.2467	6.7898	0.2654	4.9732	0.2347	9.2266	0.1787	7.13096			-0.4313	0.0138	-0.4713	0.0141	-0.3888	0.0179	-0.3331	0.0145	-0.5228	0.0161	-0.42946			-0.067	0.1781	3.5137	0.2034	3.22	0.2015	3.2815	0.1923	2.2567
	THR-74	4.4431	0.0749	3.7154	0.1043	2.7447	0.0926	4.8591	0.0607	4.3833	0.0745	4.02912			-2.1437	0.0627	-1.6199	0.0647	-1.5742	0.0697	-2.0082	0.0508	-1.9467	0.0714	-1.85854			0.0235	0.0189	0.0025	0.0197	0.0319	0.0187	-0.0041	0.0172	-0.0114	0.0172	0.00848			2.3199	0.0588	2.0963	0.083	1.2019	0.0597	2.8465	0.0607	2.4289
	MET-75	4.1089	0.0925	4.4968	0.0985	3.5504	0.0611	4.0845	0.1083	4.2299	0.0933	4.0941			-1.7896	0.0442	-1.9979	0.0339	-1.723	0.0343	-1.9067	0.0403	-2.0207	0.0297	-1.88758			-0.006	0.0141	-0.0034	0.0146	-0.0009	0.0141	-0.0025	0.0148	0.0072	0.0151	-0.00112			2.3133	0.0599	2.4932	0.0716	1.8266	0.0524	2.1746	0.0791	2.2202
	GLY-76	5.3748	0.0326	5.4409	0.0252	5.261	0.0289	5.3011	0.0332	4.8868	0.029	5.25292			-2.5275	0.021	-2.5828	0.0194	-2.7461	0.0217	-2.6053	0.0222	-2.4498	0.0193	-2.5823			-0.0016	0.0079	-0.0229	0.0091	-0.0061	0.0082	0.0205	0.0092	0.0114	0.0102	0.00026			2.8454	0.0213	2.8347	0.0181	2.5093	0.0232	2.7163	0.0211	2.4491
	LEU-77	6.2402	0.0372	6.8916	0.035	6.7339	0.035	6.3072	0.0329	6.0823	0.0269	6.45104			-3.2499	0.0302	-3.7715	0.0351	-4.1956	0.0438	-3.4422	0.0331	-3.6537	0.0276	-3.66258			-0.0353	0.012	0.0151	0.0104	0.0008	0.0129	-0.0235	0.0129	-0.0175	0.0132	-0.01208			2.9551	0.0338	3.1336	0.0299	2.5395	0.0366	2.8397	0.0352	2.4117
	ALA-78	3.5156	0.052	4.1782	0.0554	4.5076	0.0662	3.4876	0.0601	4.055	0.062	3.9488			-1.457	0.0264	-1.8447	0.0339	-2.4103	0.0465	-1.5549	0.0316	-2.158	0.0323	-1.88498			0.0185	0.0128	0.0126	0.0111	-0.0018	0.0114	0.0025	0.0123	0.0311	0.0102	0.01258			2.0745	0.0325	2.3469	0.0308	2.0934	0.0293	1.9326	0.0324	1.9296
	ALA-79	2.3937	0.0304	3.2836	0.0342	3.576	0.0393	2.4681	0.0335	3.1825	0.0382	2.98078			-0.9926	0.0183	-1.4044	0.0239	-2.0225	0.0358	-1.1435	0.0221	-1.7631	0.036	-1.46522			0.0121	0.0075	0.012	0.0064	0.0131	0.0085	-0.0068	0.0099	0.0208	0.0089	0.01024			1.4116	0.0208	1.8931	0.0223	1.5662	0.0258	1.317	0.0215	1.4413
	VAL-80	3.4699	0.0749	4.4644	0.082	4.92	0.078	3.4508	0.0717	3.882	0.0787	4.03742			-3.0812	0.0563	-3.5943	0.0785	-4.5875	0.1082	-3.1899	0.0683	-2.9738	0.0671	-3.48534			-0.0371	0.0147	-0.0319	0.0149	-0.0477	0.014	-0.0227	0.0161	-0.0416	0.0137	-0.0362			0.353	0.0392	0.8361	0.0554	0.2846	0.0755	0.2437	0.0389	0.8626
	CYS-81	3.8177	0.1971	5.6173	0.2671	3.4982	0.2421	3.7598	0.1965	5.6372	0.0894	4.46604			-2.4635	0.1108	-3.3314	0.1502	-1.872	0.158	-2.3891	0.1138	-4.3285	0.0614	-2.8769			-0.0383	0.0139	0.0072	0.0148	-0.0728	0.0149	-0.0762	0.0161	-0.0312	0.0162	-0.04226			1.3238	0.116	2.3055	0.1362	1.5536	0.1011	1.2993	0.1034	1.277
	GLN-82	-0.0541	0.0802	1.9522	0.097	2.8594	0.1181	0.2362	0.0931	3.0606	0.1025	1.61086			2.1762	0.0609	0.8203	0.0735	-0.466	0.1009	1.478	0.0643	-0.8528	0.0833	0.63114			0.0104	0.0128	0.0271	0.0145	-0.0112	0.0192	-0.0001	0.0157	0.0089	0.0178	0.00702			2.1362	0.0697	2.7979	0.0725	2.3828	0.0857	1.7176	0.0724	2.215
	LEU-83	-2.4841	0.0782	-1.9254	0.0968	-0.5831	0.1352	-2.5323	0.0873	-2.6323	0.0924	-2.03144			1.5221	0.0618	2.1505	0.076	-0.9267	0.2326	2.4009	0.0774	2.1572	0.0843	1.4608			-0.3816	0.0199	-0.3691	0.0225	-0.37	0.0169	-0.458	0.0205	-0.41	0.0182	-0.39774			-1.3428	0.0764	-0.1417	0.0832	-1.8845	0.1363	-0.5861	0.0793	-0.8868
	LYS-84	-194.859	0.9501	-176.713	0.9718	-162.644	1.4279	-187.157	1.268	-161.347	0.8984	-176.544			164.066	1.4279	135.562	1.2504	122.439	1.9455	152.899	1.78	117.326	1.4886	138.458			-1.629	0.0239	-1.3054	0.0202	-1.1956	0.0203	-1.3747	0.0224	-1.3508	0.0259	-1.3711			-32.462	0.8535	-42.414	0.681	-41.3276	0.7249	-35.5986	0.7507	-45.4278
	LYS-85	-125.658	0.924	-149.237	1.6447	-130.108	0.9858	-135.803	1.2928	-128.366	1.0838	-133.834			37.5837	0.6947	48.8031	1.4098	34.1348	0.7694	41.062	1.1839	37.4848	0.9062	39.8137			-0.8548	0.0182	-0.9331	0.0216	-0.7599	0.0205	-0.7542	0.02	-0.7759	0.0173	-0.81558			-88.8978	0.7769	-101.346	0.8376	-96.6706	0.6824	-95.4425	0.6701	-91.6601
	GLN-86	-26.5303	0.6435	-30.8625	0.3988	-33.4119	0.4609	-41.7631	0.4522	-35.2436	0.3962	-33.5623			31.2483	0.4629	31.3101	0.2816	30.1143	0.4002	37.1578	0.455	30.5947	0.3525	32.085			-2.031	0.0234	-2.0724	0.0193	-2.1119	0.0183	-2.2372	0.0214	-2.2577	0.022	-2.14204			2.6847	0.4088	-1.6453	0.2818	-5.4141	0.303	-6.836	0.2692	-6.9022
	PHE-87	-20.9837	0.2085	-20.1312	0.176	-17.132	0.1378	-17.7867	0.1341	-17.664	0.1269	-18.7395			11.2141	0.2296	7.1475	0.1943	5.0938	0.1569	6.6745	0.1443	6.8287	0.1762	7.39172			-0.8624	0.018	-0.7167	0.015	-0.7074	0.0126	-0.9508	0.0169	-0.7248	0.014	-0.79242			-10.6323	0.2004	-13.7052	0.1669	-12.7474	0.1617	-12.0649	0.1388	-11.5647
	GLN-88	-68.6295	0.4881	-65.3815	0.6977	-84.0226	0.4573	-80.6936	0.3774	-74.4448	0.7924	-74.6344			57.6177	0.8009	46.9636	0.9573	75.3666	0.458	72.9005	0.3932	66.1803	0.8542	63.8057			-2.0127	0.0234	-1.7846	0.027	-2.6757	0.0178	-2.7748	0.0157	-2.4473	0.026	-2.33902			-12.995	0.515	-20.2101	0.4308	-11.313	0.3019	-10.5575	0.328	-10.7262
	LYS-89	-160.633	1.19	-173.723	1.6337	-174.74	1.1315	-176.571	0.8359	-133.281	1.6584	-163.789			134.853	1.2794	130.689	1.8426	140.107	1.1868	146.201	0.9391	106.853	1.5558	131.741			-1.0509	0.0228	-0.5611	0.0188	-0.7084	0.0238	-0.923	0.0215	-1.0768	0.0295	-0.86404			-26.8138	0.6304	-43.5736	0.6541	-35.3426	0.5808	-31.2825	0.5911	-27.4366
	ALA-90	-13.6421	0.1247	-13.4957	0.084	-13.6186	0.0719	-13.1435	0.075	-13.9195	0.0782	-13.5639			7.8076	0.1318	6.8958	0.098	7.6342	0.0818	7.1347	0.0898	8.1001	0.0866	7.51448			-0.0591	0.0119	-0.0026	0.0089	-0.0349	0.0098	-0.0321	0.0113	-0.0451	0.0109	-0.03476			-5.8985	0.0736	-6.5983	0.0612	-6.0191	0.0685	-6.0386	0.0629	-5.8674
	CYS-91	-31.3258	0.1993	-34.5666	0.2469	-35.0968	0.2445	-32.4924	0.2321	-35.7578	0.2328	-33.8479			13.0778	0.1611	15.1086	0.1757	16.3051	0.1676	14.4364	0.1547	16.7617	0.1625	15.1379			-1.3335	0.0131	-1.2425	0.0125	-1.5374	0.0114	-1.3162	0.0121	-1.2362	0.0106	-1.33316			-19.5875	0.194	-20.696	0.2276	-20.3308	0.1969	-19.3642	0.1933	-20.2353
	ASP-92	-63.2645	0.9248	-66.6473	1.0352	-61.3304	0.9894	-64.0076	0.8003	-60.9035	0.9989	-63.2307			92.8361	1.1769	92.0673	1.3645	79.615	1.2675	93.6428	1.1003	93.8807	1.096	90.4084			-0.9759	0.0181	-0.8057	0.0177	-0.844	0.0178	-0.9597	0.0148	-0.9181	0.0204	-0.90068			28.5963	0.5797	24.496	0.7597	17.4906	0.7062	28.6465	0.7479	31.9771
	LEU-93	-6.8379	0.0579	-7.4647	0.0611	-7.2308	0.052	-7.1687	0.0513	-7.856	0.06	-7.31162			1.409	0.0486	2.1553	0.0485	2.6971	0.044	1.6795	0.042	2.8859	0.0495	2.16536			-0.0168	0.0182	0.0149	0.0176	-0.0433	0.0234	-0.0403	0.0161	-0.0402	0.0191	-0.02514			-5.448	0.0349	-5.2915	0.0353	-4.5786	0.0388	-5.5262	0.0329	-5.011
	TYR-94	-10.9376	0.1237	-12.0479	0.1568	-10.3036	0.1346	-10.5133	0.1201	-11.3202	0.1366	-11.0245			1.3923	0.0896	2.819	0.1533	2.6341	0.0789	0.7628	0.0905	2.9036	0.1388	2.10236			-0.4429	0.0117	-0.3737	0.0118	-0.4152	0.0134	-0.3579	0.0154	-0.3894	0.011	-0.39582			-9.9926	0.0988	-9.5981	0.1231	-8.0791	0.1042	-10.1065	0.0878	-8.8148
	ALA-95	-7.6888	0.0843	-7.4998	0.102	-6.879	0.0771	-7.071	0.0765	-7.1368	0.1055	-7.25508			-1.5025	0.0744	-2.089	0.0758	-1.8434	0.0738	-2.4983	0.0584	-1.9256	0.0784	-1.97176			-0.8665	0.0174	-0.8967	0.0172	-0.8476	0.0188	-0.8615	0.0179	-0.8376	0.0181	-0.86198			-10.0557	0.0839	-10.4826	0.0868	-9.5705	0.0761	-10.4307	0.0683	-9.9054
	VAL-96	-4.0839	0.0773	-3.7181	0.0686	-3.2198	0.0563	-3.9203	0.0445	-3.5704	0.0715	-3.7025			-1.5775	0.0591	-2.1644	0.05	-1.0293	0.0496	-1.0322	0.0386	-1.5372	0.0533	-1.46812			-0.0821	0.0183	-0.0369	0.0166	-0.0044	0.0146	-0.0009	0.0181	-0.0489	0.0156	-0.03464			-5.7433	0.0674	-5.9227	0.0675	-4.2558	0.0383	-4.9524	0.0348	-5.155
	ALA-97	-2.0721	0.0494	-1.9248	0.0668	-1.6876	0.0499	-2.1001	0.047	-1.9136	0.0493	-1.93964			-0.8974	0.0453	-1.951	0.0663	-1.0233	0.0467	-1.2473	0.0437	-1.2442	0.0443	-1.27264			-0.048	0.0117	0.0047	0.0106	-0.0171	0.0105	0.0027	0.0108	-0.0159	0.0095	-0.01472			-3.0166	0.0494	-3.8738	0.0511	-2.7265	0.037	-3.3446	0.0364	-3.1737
	PHE-98	-15.6236	0.1561	-25.0429	0.2137	-17.0821	0.193	-17.7158	0.2134	-16.4767	0.166	-18.3882			4.6777	0.2221	11.7985	0.1208	7.0014	0.1871	6.762	0.1914	5.8971	0.1597	7.22734			-1.6442	0.0239	-1.9551	0.0173	-1.8078	0.0245	-1.7994	0.0246	-1.6883	0.0232	-1.77896			-12.5748	0.2261	-15.1996	0.1798	-11.8868	0.157	-12.7546	0.1498	-12.2679
	THR-99	-13.3852	0.1748	-17.2001	0.2346	-11.1192	0.154	-11.6412	0.1414	-11.9979	0.1413	-13.0687			7.0637	0.2255	8.5343	0.2532	4.8927	0.1563	5.8666	0.1205	6.1729	0.1412	6.50604			-1.4059	0.0261	-1.7187	0.0222	-1.1489	0.0165	-1.2457	0.0209	-1.2016	0.0192	-1.34416			-7.7178	0.1579	-10.3794	0.1934	-7.3731	0.1399	-7.028	0.1264	-7.0322
	LEU-100	-7.6577	0.1075	-10.4784	0.1189	-4.8339	0.0869	-5.4215	0.0874	-6.4971	0.1026	-6.97772			1.2334	0.0593	0.6024	0.0642	0.7263	0.0373	0.9699	0.0324	0.7273	0.0434	0.85186			-0.5187	0.0192	-0.6125	0.022	-0.2854	0.0228	-0.4643	0.0272	-0.3516	0.0216	-0.4465			-6.9363	0.1035	-10.4851	0.1357	-4.3929	0.0878	-4.9107	0.0942	-6.1202
	LEU-101	0.3183	0.0404	0.557	0.0434	0.3696	0.0403	0.3986	0.0402	0.7042	0.0362	0.46954			-0.9739	0.0422	-1.6381	0.049	-1.1652	0.0344	-1.3833	0.0364	-1.3565	0.0311	-1.3034			-0.007	0.0204	0.0342	0.0182	-0.0033	0.018	0.0006	0.0236	-0.0394	0.0207	-0.00298			-0.662	0.0655	-1.0494	0.0593	-0.7998	0.046	-0.9849	0.0525	-0.6917
	LYS-102	18.585	1.144	27.2285	1.3002	30.0657	0.7995	45.1525	0.6125	39.795	1.1643	32.1653			34.5482	2.19	26.4379	2.2991	15.721	1.5229	-2.4588	0.4177	7.9933	1.7987	16.4483			-0.3229	0.0221	-0.3209	0.0288	-0.1721	0.024	-0.0664	0.0182	-0.2062	0.0258	-0.2177			52.7695	1.3237	53.2915	1.3411	45.6216	0.9633	42.6392	0.4298	47.5875
	ASN-103	0.5713	0.099	-0.2343	0.094	0.6864	0.086	0.4753	0.107	0.5246	0.1129	0.40466			-0.8294	0.0957	-0.8292	0.0846	-0.3671	0.0958	0.1895	0.091	0.0478	0.097	-0.35768			-0.0026	0.0115	0.0092	0.0156	-0.0188	0.0097	-0.0014	0.0089	-0.0071	0.0104	-0.00414			-0.2587	0.1329	-1.0533	0.1084	0.3027	0.1213	0.6609	0.133	0.5685
	ASP-104	11.9563	0.2318	9.1209	0.3088	5.1859	0.2337	-4.1291	0.3616	1.9669	0.2395	4.82018			-10.0019	0.1349	-8.9246	0.1704	-6.6083	0.1525	-5.5868	0.1995	-5.7234	0.1478	-7.369			-0.0372	0.0114	-0.0057	0.0115	-0.037	0.0095	-0.0322	0.0216	-0.018	0.0116	-0.02602			1.9217	0.1938	0.1937	0.2385	-1.4729	0.2118	-9.7499	0.3016	-3.7902
	TYR-105	1.8185	0.0433	0.6921	0.0243	0.5099	0.0454	0.792	0.0308	0.7569	0.0313	0.91388			-1.1219	0.0407	-0.85	0.0384	-0.6812	0.0466	-0.6484	0.0438	-0.5861	0.0412	-0.77752			-0.0443	0.0187	-0.0333	0.0183	-0.0336	0.0178	-0.0076	0.0207	0.0309	0.0179	-0.01758			0.6516	0.0575	-0.192	0.0453	-0.2059	0.0541	0.1366	0.053	0.2025
	ARG-106	-13.9484	0.2258	-12.1768	0.3234	-7.8066	0.3141	-6.5086	0.3077	-3.2063	0.2243	-8.72934			6.2115	0.0891	5.5747	0.101	4.3033	0.0976	4.7567	0.1043	3.209	0.0824	4.81104			0.0186	0.0092	-0.0224	0.0101	0.0075	0.0084	-0.0408	0.0137	0.0119	0.0097	-0.00504			-7.7192	0.1931	-6.6413	0.2744	-3.504	0.2791	-1.8124	0.2602	0.0038
	PRO-107	2.7453	0.0272	2.7494	0.0295	2.6557	0.0265	2.9406	0.0191	2.886	0.021	2.7954			-1.2107	0.0188	-1.1318	0.018	-1.2396	0.0176	-1.0861	0.0147	-1.2152	0.0165	-1.17668			-0.0191	0.0197	0.0086	0.0187	-0.04	0.0206	-0.0512	0.0173	-0.0024	0.0187	-0.02082			1.5155	0.0295	1.6257	0.0303	1.3761	0.0318	1.8038	0.0228	1.6681
	VAL-108	3.5054	0.0336	3.7182	0.0394	3.1478	0.0355	3.9273	0.0285	4.1283	0.0264	3.6854			-1.8919	0.0238	-1.8195	0.0199	-1.725	0.0229	-1.9468	0.0183	-2.0535	0.0195	-1.88734			0.063	0.0167	0.0717	0.0172	0.0757	0.0195	0.055	0.0209	0.0462	0.0235	0.06232			1.675	0.0364	1.9696	0.0417	1.4974	0.0378	2.0358	0.0347	2.1231
	PHE-109	3.5365	0.0278	3.6745	0.0333	3.405	0.0275	3.2423	0.0351	3.658	0.0378	3.50326			-2.1422	0.0231	-1.9992	0.0275	-1.9812	0.0207	-1.5858	0.0269	-1.876	0.0283	-1.91688			0.0194	0.011	0.0203	0.0113	0.0147	0.0101	0.0121	0.0125	0.0191	0.01	0.01712			1.4139	0.0241	1.6947	0.0276	1.4403	0.0232	1.669	0.0242	1.8035
	PHE-110	3.7805	0.0275	4.0159	0.033	3.8754	0.0286	3.462	0.0275	3.7027	0.04	3.7673			-1.662	0.019	-1.7989	0.026	-1.8068	0.0232	-1.4039	0.0175	-1.5673	0.0253	-1.64778			-0.0026	0.0116	0.043	0.0142	0.0179	0.0152	0.0251	0.011	-0.0083	0.0136	0.01502			2.1143	0.0244	2.2602	0.0302	2.0873	0.027	2.081	0.0248	2.1277
	THR-111	4.7266	0.041	5.1292	0.0493	4.5302	0.0507	4.1911	0.0553	5.199	0.0544	4.75522			-3.0637	0.0389	-2.9424	0.0428	-2.8786	0.0411	-2.4239	0.0429	-3.0511	0.0486	-2.87194			0.0101	0.0151	0	0.0142	-0.0451	0.0162	-0.049	0.0153	-0.0456	0.016	-0.02592			1.674	0.0426	2.1872	0.0439	1.6067	0.0491	1.7195	0.0378	2.1022
	GLY-112	4.6461	0.0386	4.6089	0.0567	4.5115	0.0273	4.7967	0.0362	5.146	0.0421	4.74184			-2.3096	0.0474	-2.3494	0.0591	-2.0194	0.0334	-2.5791	0.0412	-2.8005	0.0417	-2.4116			-0.0054	0.0098	-0.0049	0.0102	0.001	0.0077	-0.0049	0.0089	0.0237	0.0098	0.0019			2.331	0.0412	2.2542	0.047	2.4938	0.0309	2.2137	0.0351	2.3669
	GLN-113	2.9784	0.1098	2.9225	0.1463	3.0525	0.0755	2.5739	0.0913	1.9016	0.1249	2.68578			-0.8148	0.1054	-0.3822	0.1114	-0.3926	0.0684	1.022	0.0497	1.0219	0.0599	0.09086			0.0084	0.013	0.0011	0.0133	0.0119	0.0124	0.0173	0.0126	0.0215	0.0138	0.01204			2.1581	0.1151	2.5372	0.1206	2.6741	0.0789	3.6082	0.0727	2.9415
	CYS-114	2.2435	0.0563	4.1165	0.1011	4.0312	0.0921	2.2089	0.0581	2.7507	0.0777	3.07016			-1.2946	0.0446	-2.0693	0.0637	-2.2301	0.0697	-0.9928	0.0322	-1.3673	0.0571	-1.59082			0.0038	0.0097	-0.0084	0.0109	-0.0012	0.0116	-0.0021	0.0141	-0.0033	0.012	-0.00224			0.9558	0.0556	2.0416	0.0626	1.8019	0.0475	1.2149	0.0448	1.3824
	GLN-115	3.2958	0.1434	4.2626	0.1536	6.5139	0.062	5.4789	0.0656	6.9203	0.1256	5.2943			-1.9023	0.1157	-2.9166	0.1338	-1.9932	0.0929	-1.4869	0.0926	-2.4647	0.1218	-2.15274			-0.0027	0.0122	-0.0114	0.0103	0.0035	0.01	0.0001	0.0088	-0.0154	0.0092	-0.00518			1.3898	0.1432	1.3378	0.1879	4.5275	0.0913	3.9861	0.0866	4.4426
	LEU-116	3.6682	0.0474	4.7384	0.0495	4.8542	0.0374	3.3368	0.0365	4.5925	0.0362	4.23802			-1.5384	0.0478	-2.4549	0.0586	-2.5653	0.0459	-1.2537	0.0447	-2.2447	0.0553	-2.0114			0.0063	0.0131	0.0141	0.016	0.0187	0.0168	-0.046	0.0156	0.026	0.0147	0.00382			2.1346	0.0391	2.2968	0.0448	2.308	0.0349	2.0348	0.0392	2.373
	LEU-117	2.4355	0.0553	3.5914	0.0795	3.8551	0.061	0.9761	0.0625	3.2398	0.0768	2.81958			-0.2372	0.0818	-0.9889	0.1028	-1.4813	0.1133	1.0132	0.0811	-1.2928	0.0999	-0.5974			0.0379	0.0157	-0.0374	0.012	-0.0377	0.0134	-0.0754	0.0145	-0.0127	0.0118	-0.02506			2.2381	0.0748	2.5669	0.0859	2.3323	0.1053	1.9096	0.0626	1.939
	MET-118	-10.775	0.0792	-7.3251	0.2029	-5.0687	0.2148	-9.2166	0.1744	-9.9096	0.092	-8.459			8.6395	0.0688	4.1131	0.1604	2.5263	0.1512	6.199	0.1425	6.0794	0.1398	5.51146			-0.0948	0.0289	-0.013	0.0166	0.0321	0.0172	-0.061	0.0193	-0.0583	0.0174	-0.039			-2.2292	0.0895	-3.2202	0.1273	-2.5097	0.1468	-3.0696	0.144	-3.885
	ARG-119	-165.713	0.9482	-189.663	1.2476	-196.718	0.9536	-152.018	0.8606	-187.178	0.9305	-178.258			70.954	0.9254	95.2102	1.393	106.754	1.2528	60.2241	0.8138	97.9926	1.1657	86.227			-1.7748	0.0255	-1.5875	0.0378	-2.0358	0.0295	-1.563	0.0334	-1.922	0.0266	-1.77662			-96.541	0.4817	-96.0783	0.5062	-92.0379	0.5479	-93.3462	0.5297	-91.1126
	LYS-120	-129.618	0.9091	-136.121	1.0202	-131.68	0.8963	-115.88	0.7982	-132.691	1.0288	-129.198			61.3157	1.0845	56.0399	1.2548	55.9347	1.0471	43.9351	1.2322	61.3213	1.2184	55.7093			-1.912	0.0307	-1.5487	0.0321	-1.8464	0.0245	-1.5915	0.0305	-1.8515	0.03	-1.75002			-70.1903	0.6888	-81.6511	0.6566	-77.5425	0.6055	-73.5653	0.7231	-73.1872
	ALA-121	-9.9186	0.2027	-10.9509	0.2309	-16.804	0.2785	-9.7722	0.1755	-12.387	0.1895	-11.9665			4.7997	0.1342	6.7852	0.1604	7.7926	0.1462	5.4384	0.1425	6.7813	0.1406	6.31944			-0.6562	0.0246	-0.4773	0.0169	-0.8079	0.0212	-0.5433	0.0157	-0.6133	0.0192	-0.6196			-5.7742	0.1254	-4.6509	0.1212	-9.8208	0.2684	-4.8782	0.092	-6.2173
	ALA-122	-6.5934	0.137	-4.8106	0.1118	-9.0253	0.1587	-5.8411	0.141	-6.6488	0.1153	-6.58384			5.7855	0.2094	-0.7241	0.0986	8.1375	0.1291	3.9383	0.155	1.8861	0.1574	3.80466			-0.7783	0.017	-0.385	0.0129	-0.6797	0.0132	-0.7167	0.0163	-0.5136	0.0155	-0.61466			-1.6024	0.1669	-5.9236	0.091	-1.5717	0.1114	-2.611	0.1296	-5.2805
	LYS-123	-130.542	0.6017	-122.537	0.6671	-118.396	0.6239	-119.168	0.7171	-127.201	0.5908	-123.569			137.598	1.1307	136.144	1.0362	101.95	1.4315	129.895	1.0897	151.732	0.9178	131.464			-0.9955	0.0212	-1.0051	0.0161	-0.5987	0.0227	-1.0931	0.0212	-1.0867	0.0202	-0.95582			6.1287	1.0001	12.6	1.1444	-17.0383	1.0779	9.5618	1.1565	23.4242
	ALA-124	-20.176	0.1995	-20.5487	0.1853	-21.1137	0.1298	-20.2631	0.19	-20.3505	0.2271	-20.4904			14.5713	0.1679	14.0497	0.1557	18.0997	0.1055	14.6438	0.1755	13.8492	0.1926	15.0427			-0.1053	0.0122	-0.0823	0.0139	-0.1955	0.0155	-0.1101	0.0146	-0.0666	0.0107	-0.11196			-5.6971	0.1244	-6.5793	0.1522	-3.2057	0.1272	-5.7206	0.1387	-6.5719
	ARG-125	-81.2191	0.7053	-86.3029	1.1548	-67.643	1.1324	-77.4014	0.7018	-87.1861	0.9536	-79.9505			49.2616	0.6469	53.3902	1.0253	53.9495	0.8264	50.2668	0.6264	51.8447	0.7426	51.7426			-1.5749	0.0261	-1.5743	0.0245	-1.5785	0.0355	-1.7357	0.0244	-1.4299	0.0228	-1.57866			-33.554	0.5034	-34.4338	0.4625	-15.2625	1.0483	-28.8704	0.4201	-36.7489
	GLN-126	-43.6348	0.2329	-61.4293	0.2505	-43.6588	0.3076	-40.3735	0.3069	-61.6075	0.2833	-50.1408			42.0809	0.4035	45.637	0.3188	43.5928	0.2699	34.9973	0.3377	49.388	0.3168	43.1392			-2.2474	0.0186	-2.1874	0.018	-2.3125	0.0168	-2.0136	0.0197	-2.2642	0.0175	-2.20502			-3.7755	0.3739	-17.999	0.3011	-2.3869	0.2458	-7.3804	0.2964	-14.4734
	CYS-127	-7.658	0.097	-7.9731	0.1104	-7.514	0.0774	-8.5624	0.113	-8.4296	0.1167	-8.02742			2.7369	0.0651	3.0556	0.075	2.9013	0.055	3.5233	0.0863	3.4412	0.0795	3.13166			0.0015	0.0071	0.0225	0.0091	0.0052	0.0113	-0.0058	0.0086	-0.027	0.0117	-0.00072			-4.918	0.0585	-4.8983	0.0576	-4.6045	0.0578	-5.0427	0.0606	-5.0175
	PHE-128	-6.7283	0.1267	-6.975	0.1149	-4.9621	0.1107	-7.0165	0.118	-7.9823	0.1257	-6.73284			3.1467	0.0994	3.613	0.093	2.277	0.1145	3.4654	0.0988	3.9274	0.1061	3.2859			-0.4192	0.0204	-0.4457	0.0169	-0.3178	0.0222	-0.4806	0.0167	-0.5197	0.0154	-0.4366			-3.9969	0.0943	-3.8097	0.1089	-2.9963	0.1075	-4.0422	0.1155	-4.5749
	GLU-129	-82.1485	0.9362	-76.347	0.7141	-85.6359	0.658	-99.5919	1.118	-86.6032	1.0333	-86.0653			111.253	1.3094	102.668	0.8339	110.904	0.9295	125.942	1.7231	114.438	1.3345	113.041			-1.7328	0.0189	-1.6544	0.0178	-1.7391	0.0178	-1.9062	0.0234	-1.7344	0.0192	-1.75338			27.4018	0.6794	24.6622	0.6201	23.5333	0.546	24.3705	0.8518	26.148
	LEU-130	-6.6188	0.073	-6.8658	0.0813	-6.6186	0.0702	-7.2471	0.076	-7.128	0.0807	-6.89566			1.6439	0.0722	1.3047	0.0686	1.7885	0.0889	1.9827	0.0747	1.6529	0.0686	1.67454			-0.5031	0.0199	-0.5447	0.0208	-0.5218	0.0233	-0.4627	0.0247	-0.466	0.0272	-0.49966			-5.4779	0.1083	-6.1072	0.1082	-5.3577	0.0997	-5.7256	0.111	-5.9412
	VAL-131	-0.9578	0.0266	-1.0869	0.0263	-0.9297	0.0325	-0.9043	0.0308	-1.1166	0.0272	-0.99906			0.8405	0.0259	0.7878	0.0212	0.7673	0.0268	0.744	0.0255	0.7988	0.022	0.78768			0.0232	0.0155	0.0298	0.0182	0.0191	0.0168	0.0003	0.0175	0.0012	0.0147	0.01472			-0.0967	0.0287	-0.2679	0.0294	-0.142	0.0337	-0.1574	0.0371	-0.3155
	ASN-132	2.446	0.1181	1.502	0.1312	1.9152	0.1443	2.0226	0.2116	1.412	0.1577	1.85956			0.6688	0.0855	0.9091	0.0697	0.4142	0.0839	0.1828	0.094	0.6173	0.084	0.55844			0.0185	0.0108	-0.0103	0.0094	0.0141	0.0127	0.0125	0.0104	-0.0115	0.01	0.00466			3.129	0.1362	2.3966	0.1492	2.3427	0.1573	2.2162	0.211	2.0184
	GLU-133	-22.1782	0.8594	-20.7544	0.7379	-30.6676	0.6759	-48.7147	0.9918	-32.7617	0.8835	-31.0153			-0.8906	0.9155	1.6128	0.9084	3.9062	0.8712	18.3012	1.2299	4.3561	0.9353	5.45714			-0.2275	0.0206	-0.3403	0.016	-0.241	0.0208	-0.4106	0.0216	-0.3513	0.0181	-0.31414			-23.3141	0.5774	-19.4574	0.7319	-27.0055	0.521	-30.8443	0.6748	-28.7687
	ARG-134	-5.2285	0.5187	-7.625	0.6435	0.6342	0.4464	0.5637	0.5253	2.4161	0.5038	-1.8479			27.9027	0.6373	36.4735	0.7671	24.2222	0.6019	32.5392	0.6511	24.4452	0.5839	29.1166			-0.1584	0.0219	-0.2197	0.0221	-0.24	0.0232	-0.3353	0.0238	-0.1165	0.0222	-0.21398			22.5051	0.4262	28.6415	0.45	24.6043	0.4078	32.7695	0.4178	26.7459
	THR-135	-1.1657	0.0318	-1.2368	0.0319	-0.5525	0.0344	-1.3268	0.0339	-1.048	0.031	-1.06596			0.674	0.0226	0.707	0.0251	0.6015	0.0367	0.5455	0.0232	0.5118	0.0214	0.60796			0.0224	0.0098	-0.0024	0.01	-0.0041	0.0087	-0.0341	0.0102	0.0019	0.0098	-0.00326			-0.4698	0.0366	-0.5302	0.0341	0.0471	0.0446	-0.8155	0.0343	-0.5332
	GLU-136	-5.4251	0.2306	-5.2201	0.2408	-11.1681	0.2252	-12.3227	0.2425	-11.4739	0.2523	-9.12198			-0.5411	0.1618	0.112	0.1576	0.0608	0.1716	0.1478	0.1748	0.9116	0.1778	0.13822			-0.0094	0.0074	0.0054	0.0079	-0.0023	0.0075	0.0091	0.0071	-0.0038	0.0079	-0.0002			-5.9614	0.2731	-5.1089	0.2727	-11.107	0.2484	-12.174	0.2843	-10.5613
	ASP-137	4.3501	0.1562	4.565	0.1726	0.2538	0.1492	-1.0971	0.1795	-0.5714	0.1753	1.50008			-1.4385	0.1321	-1.2454	0.1224	-0.8365	0.1442	-0.8393	0.144	-0.5179	0.1332	-0.97552			-0.0098	0.0068	0.0067	0.0085	0.0102	0.0068	-0.0025	0.0067	-0.0004	0.0068	0.00084			2.9055	0.1858	3.328	0.2127	-0.572	0.2025	-1.9315	0.2191	-1.0921
	GLU-138	-1.4116	0.1732	-1.1628	0.1938	-4.7809	0.2045	-6.9519	0.2173	-3.8743	0.1904	-3.6363			0.7916	0.1461	0.6357	0.1516	0.7474	0.1631	1.0698	0.1579	1.105	0.1478	0.8699			-0.0155	0.011	0.0024	0.0123	0.0077	0.0106	-0.0218	0.0136	-0.0119	0.0102	-0.00782			-0.6476	0.225	-0.5311	0.2471	-4.0284	0.2709	-5.9031	0.278	-2.7728
	SER-139	0.9834	0.0239	1.0584	0.0235	1.0049	0.0229	1.0151	0.0237	1.0545	0.0208	1.02326			0.0304	0.0609	0.1931	0.0599	0.2462	0.065	0.2419	0.0656	0.1914	0.0545	0.1806			0.0063	0.0056	0.0063	0.006	-0.0052	0.0061	-0.0104	0.0062	-0.017	0.0073	-0.004			1.0209	0.0622	1.2572	0.0635	1.2455	0.0657	1.2469	0.073	1.228
	LEU-140	1.2758	0.0081	1.2797	0.0081	1.2232	0.0097	1.2692	0.0093	1.2665	0.0098	1.26288			-0.4913	0.0149	-0.5137	0.0135	-0.438	0.0138	-0.4556	0.0152	-0.4833	0.0111	-0.47638			-0.0037	0.0179	-0.0033	0.0192	0.0246	0.0176	0.0117	0.0179	0.0308	0.017	0.01202			0.7805	0.0239	0.7636	0.0244	0.8088	0.0227	0.8261	0.0235	0.8145
	ARG-141	5.9324	0.2511	4.6375	0.2358	11.2145	0.2298	14.3561	0.2797	11.4155	0.2819	9.5112			2.4606	0.0888	2.7039	0.0681	2.0401	0.0687	1.7311	0.0796	2.1532	0.0699	2.21778			0.0093	0.0104	0.0072	0.0131	0.01	0.0119	-0.0093	0.0144	0.0011	0.0098	0.00366			8.3839	0.2344	7.3572	0.2391	13.2559	0.236	16.0731	0.2657	13.5855
	ALA-142	0.8926	0.0138	0.8518	0.0147	1.0298	0.0167	0.9456	0.0127	0.991	0.013	0.94216			-0.4564	0.0195	-0.4705	0.0185	-0.4471	0.0198	-0.4585	0.0151	-0.4815	0.016	-0.4628			-0.0097	0.0069	-0.0005	0.0082	0.0021	0.0075	-0.0141	0.0065	0.0053	0.0074	-0.00338			0.4269	0.021	0.3813	0.0222	0.5838	0.0213	0.4736	0.0172	0.5161
	LYS-143	-13.8579	0.2621	-12.6203	0.2725	-7.9826	0.2031	-8.44	0.2721	-8.4769	0.2202	-10.2755			1.8795	0.1525	1.7429	0.1426	1.5842	0.1407	1.3266	0.1362	1.7373	0.1444	1.6541			0.0074	0.0115	-0.0041	0.01	0.0323	0.0118	0.0121	0.0132	0.0149	0.0115	0.01252			-11.9564	0.2714	-10.8848	0.2804	-6.356	0.2475	-7.0847	0.2923	-6.7259
	ALA-144	2.3863	0.0129	2.3989	0.013	2.3091	0.0133	2.4397	0.0197	2.4834	0.0134	2.40348			-1.0497	0.0138	-1.0631	0.0144	-0.9061	0.0126	-1.034	0.0169	-1.0624	0.0128	-1.02306			0.0107	0.0088	-0.0141	0.0082	0.0084	0.0094	0.0084	0.0115	0.0183	0.0113	0.00634			1.3475	0.0184	1.3213	0.0178	1.4121	0.0179	1.4145	0.0205	1.4377
	LEU-145	1.694	0.0312	1.6533	0.0326	2.1202	0.0313	1.8914	0.0295	1.9058	0.0303	1.85294			-1.0361	0.0235	-0.945	0.0256	-1.1226	0.0239	-0.9961	0.0207	-1.0184	0.0224	-1.02364			0.0171	0.0152	-0.0132	0.0152	0.0012	0.0137	0.0063	0.0129	0.0016	0.0113	0.0026			0.6746	0.0279	0.6965	0.0285	0.9974	0.0292	0.9024	0.0262	0.8873
	VAL-146	1.4833	0.0222	1.6659	0.0216	1.8911	0.0203	1.7856	0.0164	1.8208	0.0167	1.72934			-0.4419	0.0238	-0.6488	0.0204	-0.5252	0.0225	-0.4652	0.0185	-0.5696	0.0174	-0.53014			0.0071	0.0106	0.0013	0.0114	0.0014	0.012	0.0121	0.0104	-0.0055	0.0106	0.00328			1.0486	0.0255	1.0184	0.0243	1.3675	0.0238	1.3327	0.0181	1.2456
	TYR-147	2.4744	0.0531	2.5462	0.0432	2.1268	0.0326	2.4401	0.0506	2.119	0.0378	2.3413			-0.1922	0.0618	-0.1389	0.0659	-0.0819	0.0615	-0.1522	0.0599	-0.053	0.0607	-0.12364			0.0188	0.0131	0.0183	0.0112	0.0039	0.0131	0.0255	0.0129	-0.0063	0.0109	0.01204			2.304	0.0739	2.4306	0.0758	2.051	0.0707	2.3137	0.0717	2.0597
	LEU-148	4.6875	0.0521	4.4551	0.0486	3.4113	0.033	3.9813	0.0435	4.3005	0.0436	4.16714			-3.1739	0.0673	-2.6217	0.0865	-1.5528	0.046	-2.3267	0.0529	-2.7738	0.0501	-2.48978			0.0404	0.0176	0.0124	0.0191	-0.0083	0.0155	-0.0003	0.0156	0.0016	0.0139	0.00916			1.5617	0.0471	1.8436	0.0582	1.849	0.0284	1.6551	0.0375	1.5264
	GLU-149	5.6767	0.6715	11.6453	0.5875	22.765	0.4686	18.2063	0.3825	19.8656	0.3766	15.6318			10.8901	0.82	4.9142	0.6872	-6.6685	0.3776	-4.4588	0.2342	-3.7693	0.2656	0.18154			-0.2556	0.0178	-0.174	0.0165	-0.0114	0.0149	-0.0083	0.0121	-0.0243	0.0118	-0.09472			16.3121	0.4072	16.3812	0.3651	16.0539	0.3342	13.7343	0.3227	16.0672
	ALA-150	2.4384	0.0583	2.3939	0.0473	1.2422	0.0203	1.3453	0.0236	1.3575	0.0246	1.75546			-1.0815	0.0487	-0.9953	0.0451	0.7789	0.029	0.7401	0.0311	0.8111	0.0279	0.05066			0.0104	0.0091	0.0182	0.0091	0.0017	0.0075	0.0113	0.008	0.0082	0.0071	0.00996			1.3663	0.0465	1.4179	0.0373	2.0229	0.0288	2.0957	0.0289	2.1776
	LEU-151	-0.3886	0.0581	-0.8632	0.0323	-1.6637	0.0295	-1.3195	0.0291	-1.5964	0.0262	-1.16628			0.2045	0.0462	0.4791	0.0435	1.6412	0.0325	1.5955	0.0301	1.723	0.0326	1.12866			0.0031	0.0089	-0.0244	0.0074	-0.0184	0.0159	-0.0044	0.0157	-0.0091	0.0144	-0.01064			-0.1836	0.0557	-0.4069	0.0502	-0.0405	0.0424	0.2715	0.0418	0.1147
	LYS-152	-7.778	1.3151	-0.7722	0.5932	11.8057	0.3997	10.2043	0.595	10.1233	0.4213	4.71662			15.9941	0.5452	12.6977	0.342	-0.8821	0.3163	-0.7565	0.3344	0.5913	0.2712	5.5289			-0.042	0.014	0.0158	0.0127	-0.0063	0.0173	0.0198	0.0167	-0.007	0.0158	-0.00394			8.1922	0.9504	11.9336	0.4554	10.9015	0.3416	9.4922	0.4734	10.7137
RpoA	PHE-249	-34.9947	0.1877	-32.8171	0.2101	-29.5189	0.2182	-27.2615	0.2284	-32.37	0.235	-31.3924			2.817	0.1347	2.4981	0.1339	1.8176	0.13	1.2842	0.1356	2.5363	0.1301	2.19064			0.0072	0.0079	-0.0079	0.0105	0.0051	0.0096	-0.0122	0.0169	0.0001	0.0087	-0.00154			-32.1781	0.2144	-30.3309	0.2277	-27.6928	0.2473	-25.9913	0.2492	-29.8278
	ASP-250	24.7453	0.1665	21.9706	0.174	19.0762	0.2018	25.8564	0.2221	21.6342	0.2159	22.6565			-0.6526	0.1519	-0.0484	0.1414	0.3859	0.1569	-0.6657	0.1047	-0.0713	0.1302	-0.21042			-0.0088	0.0095	-0.0115	0.0093	0.01	0.0089	-0.0067	0.0049	0.0035	0.0083	-0.0027			24.084	0.214	21.9152	0.2073	19.4709	0.219	25.1712	0.2346	21.5737
	PRO-251	-0.5995	0.0301	-0.5316	0.0377	-0.6849	0.035	0.3747	0.0221	-0.4354	0.0375	-0.37534			-0.0563	0.0153	-0.0315	0.0144	0.0167	0.0156	-0.4623	0.0118	-0.0964	0.0148	-0.12596			0.0033	0.0047	0.0025	0.0053	-0.0064	0.0059	0.0008	0.0135	0.0053	0.0052	0.0011			-0.6522	0.0265	-0.5609	0.0305	-0.6757	0.0311	-0.087	0.0221	-0.5283
	ILE-252	-0.6442	0.0184	-0.8452	0.0224	-0.8811	0.0232	-0.3228	0.0456	-0.7252	0.0217	-0.6837			-0.0756	0.0153	0.0844	0.0169	0.1472	0.0161	-0.2165	0.0218	-0.0467	0.0163	-0.02144			-0.0213	0.0146	-0.0041	0.0155	0.0115	0.0129	-0.016	0.0125	-0.0415	0.0154	-0.01428			-0.7407	0.0247	-0.7649	0.0281	-0.7243	0.0261	-0.5568	0.0389	-0.8157
	LEU-253	0.6515	0.0254	0.7323	0.0298	0.6064	0.0283	-1.5806	0.0204	0.6607	0.0242	0.21406			-0.3126	0.0157	-0.2787	0.0143	-0.1671	0.0154	0.2436	0.0212	-0.3576	0.0143	-0.17448			0.0131	0.0185	-0.0226	0.0174	0.0338	0.0168	0.0079	0.009	0.0203	0.0155	0.0105			0.3523	0.0274	0.4319	0.028	0.4732	0.0278	-1.3285	0.0268	0.3238
	LEU-254	2.1508	0.0325	2.306	0.0388	2.0217	0.0432	1.5424	0.033	2.2696	0.0322	2.0581			-2.0057	0.0245	-1.8788	0.0283	-1.6133	0.0338	-1.079	0.0285	-1.9633	0.0242	-1.70802			0.0047	0.0135	-0.0118	0.0117	-0.0138	0.0118	-0.0269	0.0109	-0.0296	0.0106	-0.01548			0.1527	0.0312	0.4143	0.0324	0.3951	0.031	0.4357	0.0208	0.2767
	ARG-255	-4.5908	0.4558	-2.6469	0.5622	4.0637	0.6571	-5.9364	0.5249	-4.3101	0.4504	-2.6841			0.1296	0.2249	-0.0565	0.1596	-2.7049	0.4554	1.1457	0.1697	0.555	0.1516	-0.18622			-0.0255	0.0113	-0.0026	0.0102	-0.027	0.0115	0.003	0.0079	0.0062	0.0091	-0.00918			-4.4791	0.3253	-2.7331	0.4477	1.3306	0.383	-4.7823	0.4247	-3.7635
	PRO-256	-2.4715	0.0432	-2.9975	0.0527	-2.9918	0.0469	-2.8587	0.0439	-2.8966	0.0448	-2.84322			0.2326	0.0216	0.33	0.0271	0.3528	0.0261	0.3705	0.0244	0.3184	0.0219	0.32086			-0.0276	0.0106	0.0095	0.0096	0.0038	0.0097	-0.0354	0.0106	-0.0174	0.011	-0.01342			-2.2679	0.0279	-2.6592	0.0334	-2.6352	0.0282	-2.5237	0.0289	-2.5982
	VAL-257	-0.6477	0.0459	-1.032	0.0466	-0.8491	0.0387	-1.0985	0.0456	-0.8448	0.0405	-0.89442			-0.7812	0.0335	-0.8256	0.0367	-0.9486	0.0306	-0.689	0.0326	-0.8321	0.0318	-0.8153			-0.0185	0.0188	-0.0195	0.0179	0.0149	0.0225	0.0014	0.0192	0.1124	0.0185	0.01814			-1.4482	0.0311	-1.8797	0.0331	-1.7831	0.034	-1.7874	0.0327	-1.566
	ASP-258	-30.4749	0.5291	-41.4604	0.6286	-40.7689	0.5953	-31.172	0.7917	-37.0342	0.529	-36.1821			24.1952	0.4302	33.015	0.7013	32.5406	0.4757	25.1489	0.7366	26.5157	0.4822	28.2831			-0.01	0.0093	-0.0243	0.0097	0.0136	0.0094	-0.016	0.0112	0.0088	0.0085	-0.00558			-6.2606	0.3048	-8.4471	0.3277	-8.2515	0.3183	-6.0311	0.402	-10.5097
	ASP-259	-9.7247	0.6568	-22.1201	0.7359	-25.0052	0.6763	-7.6576	0.6373	-19.1112	0.7405	-16.7238			4.1127	0.2799	8.532	0.5812	8.954	0.4962	3.1409	0.3619	6.5559	0.4945	6.2591			-0.012	0.0083	-0.0188	0.0084	-0.0105	0.0111	-0.0094	0.0086	-0.0319	0.0087	-0.01652			-5.67	0.5282	-13.6315	0.3887	-16.0751	0.4075	-4.5231	0.4308	-12.5872
	LEU-260	-1.7177	0.0306	-2.1066	0.0477	-1.6724	0.045	-2.1197	0.0378	-1.8899	0.0409	-1.90126			0.0936	0.016	0.2539	0.0176	0.1437	0.0187	0.2696	0.0186	0.0855	0.0158	0.16926			0.0404	0.0216	0.0161	0.0201	-0.0224	0.0199	0.0597	0.0241	0.0205	0.0176	0.02286			-1.5841	0.0378	-1.8382	0.0523	-1.5513	0.0457	-1.7899	0.0406	-1.7873
	GLU-261	2.7476	0.3596	-5.9452	0.4399	-2.16	0.2765	-4.6035	0.5105	-0.5295	0.2809	-2.09812			1.5604	0.123	2.0561	0.1664	2.0095	0.13	1.9221	0.1501	1.7659	0.1231	1.8628			0.0042	0.0068	0.0149	0.0067	-0.0014	0.0085	-0.018	0.0073	-0.0042	0.0059	-0.0009			4.3399	0.4058	-3.8733	0.4189	-0.1502	0.2867	-2.6815	0.5003	1.234
	LEU-262	-0.7136	0.0278	-0.7958	0.0302	-0.8067	0.0303	-0.608	0.0303	-0.7657	0.0309	-0.73796			-0.1863	0.0272	-0.2251	0.0334	-0.2967	0.0322	-0.2744	0.0313	-0.1763	0.0278	-0.23176			-0.0356	0.0173	0.0022	0.0178	-0.0361	0.018	-0.0212	0.0132	0.0287	0.0162	-0.0124			-0.9371	0.0388	-1.0207	0.0443	-1.1397	0.0425	-0.9034	0.0403	-0.9132
	THR-263	-0.8405	0.0346	-1.0245	0.0402	-0.549	0.028	-0.6071	0.028	-1.2106	0.0343	-0.84634			0.5118	0.024	0.7078	0.024	0.6605	0.0227	0.4563	0.0242	0.6315	0.0189	0.59358			-0.0076	0.0073	0.0056	0.0056	0.0199	0.0065	-0.0028	0.0069	0.0104	0.0062	0.0051			-0.336	0.0351	-0.3088	0.0368	0.131	0.0327	-0.1545	0.0312	-0.5689
	VAL-264	-0.1268	0.0579	-0.4663	0.0455	0.0214	0.0388	-0.0607	0.0339	-1.0779	0.0306	-0.34206			0.3799	0.0437	0.6621	0.0359	0.6296	0.0339	0.5477	0.0338	0.8164	0.0378	0.60714			-0.0095	0.0109	0.002	0.0091	0.0047	0.0109	0.0074	0.0106	0.0075	0.0088	0.00242			0.2428	0.0543	0.1982	0.0473	0.6562	0.0453	0.4928	0.0354	-0.2565
	ARG-265	-22.7965	0.1352	-21.0549	0.1465	-20.0206	0.1683	-21.2374	0.1837	-18.4618	0.1264	-20.7142			-0.0191	0.0681	-0.5846	0.0662	-0.6596	0.0609	-0.6805	0.064	-0.8063	0.0685	-0.55002			-0.0121	0.0107	0.0028	0.0114	0.008	0.0132	-0.0009	0.0123	0.0384	0.0128	0.00724			-22.8243	0.1278	-21.6394	0.1483	-20.6734	0.1663	-21.9282	0.1996	-19.2282
	SER-266	-0.6558	0.0352	-0.9387	0.0332	-0.2558	0.0279	-0.7027	0.0252	-0.879	0.0263	-0.6864			0.7752	0.0177	1.0614	0.0197	0.8669	0.0174	0.9575	0.0174	0.9231	0.0152	0.91682			0.0023	0.0077	-0.0145	0.006	0.0043	0.0061	0.003	0.0064	-0.0008	0.005	-0.00114			0.1212	0.0283	0.1074	0.0287	0.6153	0.0214	0.2585	0.0211	0.0429
	ALA-267	-1.4236	0.0483	-1.6916	0.0556	-1.0317	0.0386	-1.5498	0.0382	-0.946	0.0394	-1.32854			1.5341	0.0324	1.8848	0.0352	1.6108	0.0278	1.6573	0.0285	1.3795	0.0248	1.6133			-0.0089	0.0086	0.0247	0.0106	-0.0031	0.0101	-0.0073	0.0073	-0.0182	0.0112	-0.00256			0.1022	0.0283	0.2203	0.0365	0.5749	0.0228	0.102	0.0223	0.4133
	ASN-268	-2.4502	0.1952	-1.6064	0.1773	-3.23	0.1124	-2.7869	0.1262	-3.3939	0.1768	-2.69348			2.1837	0.1457	2.3645	0.096	2.0146	0.071	1.8594	0.0982	2.3712	0.1082	2.15868			-0.0013	0.0084	-0.0116	0.0126	-0.014	0.0127	0.0219	0.0131	-0.0143	0.0078	-0.00386			-0.273	0.1258	0.7518	0.15	-1.2282	0.0736	-0.903	0.071	-1.0332
	CYS-269	1.1692	0.0587	0.1104	0.0587	0.311	0.0466	0.2173	0.0527	0.578	0.0602	0.47718			0.2544	0.0262	0.7226	0.0324	0.6597	0.0223	0.5016	0.0275	0.524	0.0232	0.53246			0.0078	0.0061	0.0095	0.0063	-0.0144	0.0077	-0.011	0.007	0.002	0.0053	-0.00122			1.4268	0.0484	0.843	0.0353	0.9557	0.0332	0.7086	0.0309	1.1029
	LEU-270	-0.8308	0.0624	-1.0885	0.0792	-1.0969	0.0586	-1.248	0.0573	-1.0325	0.067	-1.05934			1.9465	0.0734	2.6292	0.0985	2.7569	0.0912	2.0187	0.0784	2.8917	0.0881	2.4486			-0.0054	0.0216	-0.013	0.0198	-0.0365	0.0187	0.0148	0.0178	0.0135	0.0214	-0.00532			1.114	0.0668	1.5307	0.0901	1.6239	0.0705	0.7833	0.0644	1.8716
	LYS-271	32.1046	0.6407	41.237	0.6078	30.8945	0.4692	29.2665	0.5747	34.1755	0.4751	33.5356			-41.747	0.5916	-44.2789	0.6531	-42.1261	0.5357	-43.6789	0.496	-35.4286	0.522	-41.4519			-0.1312	0.0166	-0.1223	0.0167	-0.0921	0.0164	-0.0848	0.0136	-0.0864	0.0143	-0.10336			-9.7792	0.3545	-3.1422	0.2844	-11.3624	0.3696	-14.5075	0.4077	-1.3601
	ALA-272	0.476	0.1148	-0.0581	0.1232	-0.1138	0.1177	-0.0477	0.1024	0.5975	0.0843	0.17078			-0.3977	0.0863	0.3244	0.0943	0.4928	0.1073	0.0397	0.073	-0.0597	0.0574	0.0799			-0.0465	0.0096	-0.0341	0.0078	-0.0479	0.0082	-0.0369	0.0069	-0.0071	0.0067	-0.0345			0.0303	0.0588	0.2282	0.0645	0.3294	0.0523	-0.0445	0.0618	0.5274
	GLU-273	33.9066	0.3532	26.9651	0.3633	26.1721	0.4295	27.1368	0.3954	24.5555	0.2991	27.7472			13.8239	0.31	19.8231	0.3215	21.7198	0.3625	19.365	0.3815	18.0969	0.2789	18.5657			-0.2463	0.0152	-0.2168	0.0143	-0.3207	0.0131	-0.2696	0.0142	-0.2159	0.0123	-0.25386			47.4886	0.2696	46.5855	0.2885	47.5738	0.2733	46.2254	0.3008	42.4357
	ALA-274	-7.8687	0.1938	-7.7037	0.185	-7.6545	0.1682	-8.3987	0.1628	-7.6392	0.178	-7.85296			6.6662	0.1972	6.6754	0.1944	6.6226	0.1713	7.6423	0.1738	6.5454	0.1884	6.83038			-0.5716	0.0113	-0.5368	0.0121	-0.5499	0.0119	-0.5615	0.0107	-0.5524	0.011	-0.55444			-1.7618	0.0855	-1.5667	0.0813	-1.5814	0.0936	-1.3113	0.0869	-1.6441
	ILE-275	-6.8868	0.1457	-7.9863	0.1536	-6.6566	0.1479	-8.2296	0.1437	-7.6496	0.1527	-7.48178			4.1476	0.1641	5.681	0.1855	4.2185	0.1811	5.4319	0.173	5.8482	0.1872	5.06544			-0.1552	0.0134	-0.1106	0.0153	-0.0652	0.0182	-0.0968	0.015	-0.1106	0.0131	-0.10768			-2.8982	0.066	-2.4187	0.087	-2.4977	0.077	-2.9013	0.076	-1.9074
	HIS-276	-38.8469	0.3199	-37.3434	0.3529	-36.9363	0.371	-39.2345	0.2667	-37.2686	0.3085	-37.9259			40.0499	0.2703	38.3405	0.281	38.4589	0.3069	39.3977	0.2979	37.8815	0.3162	38.8257			-1.2984	0.0124	-1.2288	0.0145	-1.2264	0.0128	-1.2023	0.0123	-1.1703	0.0108	-1.22524			-0.088	0.2093	-0.2168	0.2594	0.2933	0.2257	-1.0297	0.2019	-0.5359
	TYR-277	-15.8748	0.1558	-16.0201	0.1821	-15.8083	0.3148	-16.2498	0.1553	-16.7513	0.1499	-16.1409			14.0798	0.1113	14.0906	0.1265	13.6746	0.2985	14.2297	0.1251	14.4386	0.1041	14.1027			-0.4768	0.0088	-0.5013	0.009	-0.4777	0.0126	-0.4756	0.0085	-0.5236	0.0094	-0.491			-2.265	0.1258	-2.4229	0.1423	-2.6146	0.1588	-2.4886	0.1276	-2.8411
	ILE-278	0.0911	0.0208	0.2259	0.0256	0.3399	0.024	-0.0152	0.0257	0.0741	0.0239	0.14316			0.6868	0.0109	0.5989	0.0164	0.4993	0.0135	0.712	0.0143	0.6856	0.0135	0.63652			0.0041	0.0137	-0.0269	0.0138	0.0379	0.0121	0.02	0.0152	0.018	0.0133	0.01062			0.7824	0.0206	0.7973	0.0221	0.8768	0.0205	0.7156	0.0243	0.7782
	GLY-279	-0.4339	0.0222	-0.3737	0.0289	-0.1279	0.0245	-0.6047	0.0265	-0.4862	0.0212	-0.40528			0.7483	0.0133	0.6798	0.0153	0.5068	0.0164	0.7414	0.014	0.7571	0.0126	0.68668			0.0079	0.0043	0.0044	0.0046	-0.005	0.0049	-0.0051	0.0058	0.0028	0.005	0.001			0.3229	0.019	0.3108	0.0201	0.3742	0.0163	0.1303	0.0207	0.2736
	ASP-280	38.5116	0.3855	36.4017	0.3227	39.9198	0.5297	41.2348	0.4556	32.7119	0.2798	37.756			3.3019	0.2325	4.8919	0.215	1.7949	0.3254	2.7045	0.2331	4.5946	0.1885	3.45756			-0.0081	0.0044	-0.0013	0.0048	-0.0072	0.0063	-0.0088	0.0071	-0.0048	0.0041	-0.00604			41.798	0.2631	41.3051	0.236	41.7242	0.2937	43.9254	0.2845	37.2966
	LEU-281	0.7366	0.0162	0.7695	0.0198	0.8787	0.0177	0.6851	0.0209	0.6486	0.0177	0.7437			0.0546	0.0118	-0.0371	0.0126	-0.102	0.0133	-0.0237	0.0116	0.0268	0.0122	-0.01628			0.0535	0.0201	0.0549	0.0195	0.035	0.0231	0.0825	0.0244	-0.029	0.0206	0.03938			0.8453	0.0238	0.7878	0.0268	0.8119	0.0289	0.7439	0.0291	0.6465
	VAL-282	0.0224	0.0115	0.0384	0.0124	0.1561	0.0143	-0.0528	0.0157	0.0214	0.0115	0.0371			0.0769	0.0065	0.0125	0.0069	-0.0409	0.009	0.03	0.0075	0.0777	0.0065	0.03124			0.0389	0.0123	-0.014	0.0117	0.0155	0.0131	-0.0106	0.0109	0.0061	0.012	0.00718			0.1376	0.0163	0.0363	0.0161	0.1303	0.0167	-0.0334	0.0155	0.1055
	GLN-283	-0.7716	0.0622	-0.3837	0.08	-0.5217	0.0664	-0.3794	0.0742	-0.5852	0.0559	-0.52832			0.6787	0.0726	0.6426	0.0676	0.4329	0.069	0.6002	0.0648	0.4046	0.0682	0.5518			-0.0201	0.0093	0.0028	0.0074	0.0002	0.0088	-0.0114	0.0083	0.0107	0.0069	-0.00356			-0.1174	0.0887	0.2587	0.1022	-0.0865	0.0984	0.2136	0.0963	-0.178
	ARG-284	-40.7357	0.258	-38.7348	0.2649	-39.7736	0.3046	-41.8082	0.2762	-35.4679	0.2421	-39.304			-5.3107	0.1438	-6.5452	0.1548	-4.1948	0.1658	-4.048	0.1375	-6.3659	0.1541	-5.29292			-0.0372	0.0113	-0.007	0.0097	-0.0034	0.0122	-0.0139	0.0134	0.0117	0.0098	-0.00996			-46.0776	0.2054	-45.2932	0.225	-43.9848	0.2523	-45.872	0.251	-41.8204
	THR-285	-0.0556	0.0102	-0.0478	0.0112	0.0096	0.0112	-0.0173	0.0108	-0.1603	0.0091	-0.05428			0.2725	0.0239	0.3481	0.0264	0.2694	0.023	0.2415	0.0217	0.2646	0.021	0.27922			0.0046	0.0119	-0.0057	0.0114	-0.0107	0.0115	-0.0123	0.0118	0.0039	0.0098	-0.00404			0.2227	0.0307	0.2958	0.0296	0.269	0.0256	0.2126	0.0267	0.1081
	GLU-286	30.5848	0.113	31.0227	0.1452	29.7527	0.1395	29.103	0.1433	27.0265	0.1228	29.4979			1.4392	0.1123	1.6543	0.1083	1.5174	0.0908	1.5883	0.1257	1.6433	0.1173	1.5685			-0.0193	0.0122	0.0192	0.0161	0.0203	0.0161	0.0118	0.0143	0.0181	0.01	0.01002			32.0064	0.1673	32.7003	0.1771	31.2843	0.1503	30.7082	0.1862	28.6863
	VAL-287	0.5598	0.0104	0.5868	0.0095	0.5703	0.0107	0.5465	0.0091	0.4168	0.0091	0.53604			0.033	0.0153	0.0856	0.0116	0.1188	0.0125	0.1028	0.017	0.0805	0.0179	0.08414			0.0006	0.0067	-0.0003	0.0076	0.0011	0.0099	0.003	0.0072	-0.0015	0.0064	0.00058			0.5925	0.0204	0.6716	0.0162	0.6905	0.0185	0.6522	0.0204	0.4954
	GLU-288	43.5967	0.1742	40.712	0.1708	38.5595	0.1915	40.2815	0.1951	38.7159	0.1534	40.3731			1.6506	0.1075	1.8554	0.1154	1.9263	0.1021	1.7919	0.1106	2.0036	0.1099	1.84556			-0.0231	0.0088	-0.009	0.0099	0.0304	0.0119	-0.0035	0.01	-0.0039	0.0091	-0.00182			45.2228	0.2118	42.5558	0.2072	40.5204	0.1984	42.0715	0.2302	40.718
	LEU-289	0.5103	0.0205	0.5786	0.0204	0.4822	0.0189	0.4394	0.0167	0.2786	0.0176	0.45782			0.1467	0.007	0.2305	0.0075	0.2979	0.0085	0.2779	0.0073	0.273	0.0088	0.2452			-0.0213	0.0148	0.0183	0.0156	-0.0148	0.0163	0.0271	0.0143	-0.0112	0.0142	-0.00038			0.6361	0.0241	0.8273	0.0242	0.7653	0.0229	0.7455	0.0237	0.5399
	LEU-290	0.6095	0.0111	0.6919	0.0101	0.624	0.0124	0.6171	0.0102	0.4389	0.01	0.59628			0.133	0.0209	0.1107	0.0207	0.1598	0.0207	0.139	0.0204	0.1293	0.0224	0.13436			-0.0453	0.0169	0.0142	0.0146	-0.021	0.0154	0.0019	0.0143	0.0108	0.0173	-0.00788			0.6969	0.0311	0.8152	0.0255	0.7635	0.0268	0.7586	0.0255	0.5798
	LYS-291	-45.7306	0.2637	-43.5772	0.2211	-41.1176	0.2472	-42.5804	0.2276	-40.8529	0.2181	-42.7717			0.5844	0.1395	0.2958	0.1329	0.047	0.1526	0.3707	0.1541	0.4199	0.131	0.34356			-0.011	0.0116	0.0036	0.0138	0.0247	0.0145	0.0065	0.0124	-0.0047	0.0107	0.00382			-45.1524	0.2998	-43.2896	0.2543	-41.0343	0.2893	-42.2107	0.2637	-40.4388
	THR-292	0.792	0.0348	1.0389	0.0238	0.4404	0.0531	0.6996	0.046	0.87	0.0229	0.76818			-0.1476	0.0334	-0.3856	0.0344	-0.1173	0.048	-0.1819	0.0399	-0.1766	0.0354	-0.2018			-0.0096	0.0081	-0.0054	0.0059	-0.0168	0.0078	-0.0132	0.0066	-0.0071	0.0054	-0.01042			0.6333	0.0389	0.648	0.0355	0.3059	0.0516	0.507	0.0487	0.6905
	PRO-293	-1.7306	0.0182	-1.7186	0.021	-1.7311	0.0221	-1.7021	0.0171	-1.3534	0.0145	-1.64716			0.5379	0.0094	0.6121	0.0133	0.5387	0.0112	0.5406	0.0103	0.4791	0.0096	0.54168			0.0129	0.0043	0.0001	0.0055	-0.0002	0.0057	0.0083	0.0049	-0.0066	0.004	0.0029			-1.1793	0.0181	-1.1061	0.0207	-1.1949	0.0234	-1.1533	0.0169	-0.8811
	ASN-294	-1.7389	0.0716	0.6063	0.099	-0.6002	0.0889	-0.7188	0.0835	-2.6217	0.072	-1.01466			-0.9322	0.041	0.2335	0.0646	-0.5623	0.0661	-0.5479	0.0679	-0.4519	0.0482	-0.45216			-0.014	0.0073	0.0005	0.0101	-0.0128	0.0073	-0.0085	0.0065	-0.0086	0.0062	-0.00868			-2.686	0.0613	0.8407	0.0659	-1.1775	0.0951	-1.2716	0.0857	-3.082
	LEU-295	0.7588	0.0146	0.7592	0.014	0.8105	0.0162	0.786	0.0161	0.5927	0.0121	0.74144			-0.0878	0.0252	-0.1618	0.022	-0.2726	0.0263	-0.1834	0.0252	-0.1303	0.0244	-0.16718			0.0059	0.0166	-0.0378	0.0151	0.0101	0.0169	0.0222	0.0184	-0.0004	0.0157	3.79471e-19			0.6775	0.0315	0.5607	0.0276	0.5489	0.0331	0.6243	0.0328	0.4617
	GLY-296	-0.2295	0.0053	-0.2627	0.0044	-0.2496	0.006	-0.2529	0.0058	-0.1989	0.0045	-0.23872			0.0633	0.0083	0.0437	0.0087	0.067	0.0082	0.079	0.0077	0.0663	0.0087	0.06386			-0.0008	0.0019	0.0024	0.0017	-0.0045	0.0045	0.0035	0.0018	-0.0002	0.0032	8e-05			-0.1666	0.0097	-0.2167	0.0092	-0.1871	0.0115	-0.1706	0.0087	-0.1327
	LYS-297	-34.8435	0.1918	-33.9984	0.1389	-33.2202	0.1768	-33.2615	0.1754	-30.3832	0.1323	-33.1414			1.0001	0.1342	1.1197	0.1452	0.5544	0.1475	0.7843	0.1324	1.0495	0.1459	0.9016			-0.0076	0.0148	-0.0004	0.0128	0.0043	0.0108	-0.0096	0.0112	-0.0048	0.0136	-0.00362			-33.8515	0.2435	-32.8878	0.2118	-32.6517	0.2308	-32.483	0.2244	-29.3292
	LYS-298	-29.0466	0.1663	-28.0991	0.1248	-27.8286	0.1611	-29.1317	0.166	-23.091	0.1573	-27.4394			1.3142	0.1272	1.0869	0.1201	0.5729	0.1334	0.5788	0.1236	0.2551	0.1199	0.76158			-0.0037	0.0086	-0.0057	0.0081	0.0061	0.0118	-0.0203	0.01	0.0051	0.0065	-0.0037			-27.737	0.1915	-27.0291	0.1612	-27.2566	0.203	-28.5651	0.2003	-22.8238
	SER-299	-1.0919	0.0135	-1.2957	0.0186	-1.1381	0.0145	-1.1562	0.0149	-0.8377	0.0134	-1.10392			0.1865	0.0112	0.2243	0.0105	0.1706	0.013	0.1908	0.012	0.0528	0.0091	0.165			-0.004	0.0054	-0.0061	0.0052	-0.0112	0.0073	-0.0154	0.0055	0.0077	0.0059	-0.0058			-0.9098	0.016	-1.077	0.0179	-0.9797	0.0177	-0.9815	0.0143	-0.777
	LEU-300	-0.9285	0.0079	-1.012	0.0094	-0.9583	0.0094	-0.8814	0.0084	-0.8034	0.0084	-0.91672			0.0944	0.0062	0.092	0.0065	0.0771	0.0068	0.062	0.0061	0.0552	0.0053	0.07614			-0.0121	0.0175	0.0172	0.0169	-0.0037	0.0163	0.0201	0.0163	0.0035	0.016	0.005			-0.8463	0.0186	-0.9021	0.0186	-0.8852	0.0188	-0.7995	0.0177	-0.7461
	THR-301	-0.6086	0.0178	-0.6421	0.0191	-0.6176	0.0184	-0.6431	0.0159	-0.5392	0.0194	-0.61012			0.3838	0.0431	0.4002	0.0428	0.2918	0.0429	0.3375	0.0412	0.3133	0.0445	0.34532			-0.0015	0.0078	-0.0074	0.0067	0.006	0.0084	-0.0209	0.0071	-0.0071	0.007	-0.00618			-0.2273	0.0489	-0.2512	0.0466	-0.3192	0.0496	-0.3267	0.0456	-0.2372
	GLU-302	17.4769	0.154	14.4131	0.1667	15.7688	0.2066	15.3436	0.2132	13.4895	0.1345	15.2984			2.0418	0.0924	3.0702	0.103	2.7331	0.1099	2.9429	0.0814	3.28	0.0913	2.8136			0.0029	0.0051	0.0121	0.0061	-0.0031	0.0077	0.0047	0.0061	0.0094	0.0066	0.0052			19.5215	0.1585	17.4972	0.1469	18.4907	0.1903	18.2961	0.2024	16.7749
	ILE-303	-0.9015	0.0098	-0.9727	0.0121	-0.9183	0.0108	-0.9165	0.0104	-0.7065	0.0113	-0.8831			-0.0783	0.0067	-0.0869	0.0068	-0.1322	0.0066	-0.0789	0.0053	-0.1481	0.0065	-0.10488			0.0244	0.0209	0.0416	0.0205	-0.0411	0.0198	0.0072	0.0232	-0.0339	0.0226	-0.00036			-0.9545	0.0228	-1.0184	0.0249	-1.091	0.0231	-0.9893	0.0274	-0.8887
	LYS-304	-27.5429	0.1167	-25.3969	0.113	-24.945	0.1368	-26.0049	0.1331	-23.8172	0.0951	-25.5414			-0.1052	0.1177	0.216	0.1363	-0.1846	0.123	-0.4683	0.1266	-0.2215	0.1186	-0.15272			-0.0079	0.0163	-0.0044	0.0164	0.0191	0.0147	0.0072	0.0141	0	0.0124	0.0028			-27.6535	0.1529	-25.1878	0.1812	-25.1115	0.1832	-26.4634	0.1735	-24.0385
	ASP-305	17.9466	0.1502	14.8541	0.1506	16.1221	0.1465	16.4447	0.1961	14.7272	0.1255	16.0189			1.6364	0.1292	1.624	0.1317	1.1989	0.121	1.3976	0.1265	1.7022	0.1262	1.51182			0.0033	0.0079	0.0038	0.0072	-0.0094	0.0095	-0.0022	0.0084	-0.006	0.0078	-0.0021			19.5844	0.2152	16.4819	0.2024	17.3073	0.1912	17.8516	0.2235	16.434
	VAL-306	-0.4441	0.0162	-0.4459	0.0155	-0.4427	0.0129	-0.5623	0.0157	-0.2585	0.0119	-0.4307			-0.1365	0.0081	-0.2111	0.0083	-0.2115	0.0089	-0.184	0.0094	-0.1893	0.0081	-0.18648			0.0228	0.0145	0.0473	0.0142	-0.0236	0.0165	0.0113	0.0154	-0.0256	0.0153	0.00644			-0.5578	0.0215	-0.609	0.0205	-0.6775	0.0208	-0.7349	0.0234	-0.4732
	LEU-307	-0.211	0.0122	-0.2113	0.0116	-0.2792	0.0115	-0.281	0.0122	-0.0883	0.0092	-0.21416			-0.1095	0.0043	-0.1569	0.0051	-0.1543	0.006	-0.168	0.0049	-0.1539	0.0041	-0.14852			0.008	0.0126	0.0105	0.014	0.0023	0.0146	-0.002	0.0138	-0.0158	0.0123	0.0006			-0.313	0.0168	-0.3577	0.0175	-0.4315	0.0184	-0.4509	0.0191	-0.2574
	ALA-308	0.0033	0.0078	0.0549	0.0089	-0.0531	0.0081	-0.0201	0.0094	0.0883	0.0064	0.01466			0.0893	0.0154	0.0241	0.0154	-0.0107	0.0166	0.0191	0.0178	0.0522	0.0173	0.0348			0.004	0.0042	0.006	0.0031	0.0019	0.0038	-0.0049	0.0039	-0.0022	0.0038	0.00096			0.0959	0.0187	0.0856	0.0165	-0.0627	0.0199	-0.0059	0.0202	0.1378
	SER-309	0.0033	0.0224	0.0065	0.0306	-0.1548	0.0304	0.0678	0.0257	0.1448	0.0224	0.01352			0.3363	0.0418	0.2437	0.0384	0.1939	0.0465	0.2076	0.0477	0.3282	0.0501	0.26194			0.0043	0.0059	0.0014	0.0062	0.0111	0.0065	0.0004	0.0078	0.0075	0.0054	0.00494			0.3417	0.0465	0.2536	0.0545	0.0497	0.0562	0.278	0.0519	0.484
	ARG-310	-7.9864	0.2299	-3.1327	0.2442	-4.6755	0.2011	-3.645	0.3031	-5.4762	0.207	-4.98316			-0.2223	0.0736	-0.9731	0.0811	-0.6015	0.0685	-0.7894	0.0842	-0.1855	0.0682	-0.55436			-0.0192	0.0151	0.0266	0.0174	0.0115	0.0151	0.0186	0.0168	-0.0396	0.0159	-0.00042			-8.2317	0.2219	-4.069	0.2293	-5.2581	0.1895	-4.4132	0.283	-5.7002
	GLY-311	0.4695	0.0066	0.534	0.0082	0.3609	0.009	0.5046	0.0082	0.5099	0.0067	0.47578			0.1142	0.0206	0.0503	0.021	-0.0224	0.0236	0.0694	0.0219	0.0968	0.0232	0.06166			0.0019	0.0048	0.004	0.0048	-0.0093	0.0047	-0.0028	0.0067	-0.0083	0.005	-0.0029			0.5851	0.0229	0.5898	0.0242	0.3284	0.0263	0.571	0.0246	0.6007
	LEU-312	-0.049	0.0056	-0.0367	0.0064	0.0248	0.0067	-0.076	0.0071	-0.0743	0.0052	-0.04224			0.0306	0.0223	-0.0102	0.0216	0.048	0.0217	0.0719	0.019	0.0273	0.0214	0.03352			-0.0062	0.0168	-0.0349	0.0169	0.0352	0.0189	-0.0028	0.0137	0.0211	0.0168	0.00248			-0.0235	0.0276	-0.0812	0.0309	0.1081	0.0285	-0.0078	0.0243	-0.0243
	SER-313	0.235	0.0177	0.2076	0.0155	0.2356	0.0183	0.182	0.0184	0.2356	0.0169	0.21916			0.293	0.046	0.3212	0.0461	0.2902	0.0562	0.3745	0.0451	0.3619	0.0493	0.32816			0.0196	0.0089	0.0104	0.0093	-0.0024	0.0087	-0.0061	0.0083	-0.004	0.0075	0.0035			0.5498	0.0465	0.5394	0.0488	0.5222	0.0576	0.5532	0.0491	0.5943
	LEU-314	-0.0162	0.0062	0.0223	0.007	0.0221	0.0066	-0.002	0.0071	0.0869	0.0068	0.02262			0.0546	0.0359	-0.0675	0.0369	-0.0298	0.0362	-0.0115	0.0343	0.0142	0.0317	-0.008			0.0091	0.0194	0.0005	0.0209	0.0041	0.0207	0.0483	0.0184	0.0102	0.0161	0.01444			0.0493	0.0414	-0.0454	0.0453	-0.0032	0.0419	0.0348	0.0402	0.1101
	GLY-315	-0.0196	0.0173	0.0794	0.015	0.0825	0.0146	-0.0082	0.0165	0.1383	0.0178	0.05448			0.1474	0.0213	0.03	0.0189	0.0372	0.0205	0.0044	0.0182	0.055	0.0206	0.0548			0.0158	0.0087	-0.0009	0.0077	-0.0153	0.0079	0.0058	0.0092	0.0043	0.007	0.00194			0.1409	0.0286	0.1083	0.0225	0.104	0.0264	0.0015	0.0266	0.1984
	MET-316	0.2108	0.0267	0.179	0.0245	0.3093	0.0278	0.169	0.0311	0.009	0.0283	0.17542			0.2148	0.0251	0.1377	0.0192	0.1246	0.0204	0.0911	0.0156	0.1421	0.0216	0.14206			-0.0137	0.0142	0.0063	0.0126	0.0047	0.0132	0.0017	0.0131	0.0067	0.0125	0.00114			0.4126	0.0403	0.3227	0.0328	0.4374	0.0358	0.2623	0.0392	0.1591
	ARG-317	-41.1543	0.2587	-38.7133	0.2234	-35.9583	0.2627	-39.3484	0.2737	-39.3876	0.2784	-38.9124			0.7852	0.0745	0.3152	0.066	0.4863	0.071	0.2764	0.0727	0.561	0.0691	0.48482			-0.0047	0.007	-0.0025	0.006	-0.01	0.0075	-0.0103	0.0075	0.0016	0.0076	-0.00518			-40.3758	0.2624	-38.3952	0.2326	-35.4793	0.27	-39.105	0.2944	-38.834
	LEU-318	0.5193	0.0219	0.4834	0.0191	0.5166	0.0162	0.8435	0.0228	0.5431	0.0175	0.58118			0.296	0.0284	0.3182	0.0293	0.1208	0.0241	0.0584	0.0226	0.166	0.0228	0.19188			0.0027	0.014	0.0199	0.0108	-0.0061	0.0139	0.0075	0.0151	0.0176	0.0137	0.00832			0.8184	0.0351	0.8234	0.035	0.6301	0.0298	0.9076	0.0276	0.7269
	GLU-319	41.009	0.2506	40.7406	0.3566	35.6228	0.3075	36.8971	0.2239	39.6432	0.3375	38.7825			0.365	0.1399	0.15	0.1464	0.1623	0.142	-0.1778	0.1348	0.0218	0.1431	0.10426			-0.0044	0.0041	0.0084	0.0046	-0.0063	0.0055	0.0019	0.0103	-0.0069	0.0046	-0.00146			41.3808	0.292	40.899	0.3716	35.7771	0.3161	36.7084	0.2561	39.6451
	ASN-320	-2.8116	0.1722	-3.4908	0.173	-1.7676	0.1248	-2.0702	0.1638	-2.5529	0.1774	-2.53862			0.9273	0.1292	1.2756	0.1119	0.5792	0.0946	0.8265	0.0894	1.0183	0.1046	0.92538			-0.0157	0.006	-0.0064	0.0065	-0.0014	0.0062	0.009	0.0115	-0.0052	0.0064	-0.00394			-1.9015	0.1592	-2.2252	0.1499	-1.195	0.1371	-1.2379	0.1524	-1.534
	TRP-321	-2.3617	0.1654	-2.7623	0.1812	-1.1568	0.1286	-2.2916	0.1556	-2.8083	0.1588	-2.27614			3.817	0.1667	3.8379	0.1795	2.3593	0.1279	2.5669	0.1472	4.1308	0.1657	3.34238			-0.0365	0.0095	-0.0315	0.0099	-0.0098	0.0088	-0.0033	0.0079	-0.025	0.0087	-0.02122			1.4317	0.0889	1.0387	0.0892	1.1916	0.085	0.2719	0.0814	1.2913
	PRO-322	-2.9761	0.0549	-3.6092	0.0601	-2.8174	0.0456	-2.6414	0.0595	-3.0398	0.044	-3.01678			0.3004	0.0487	0.6264	0.0445	0.1601	0.0378	-0.1627	0.0408	0.2545	0.0352	0.23574			0.0117	0.0101	-0.0097	0.0078	-0.0031	0.01	-0.02	0.0116	-0.0198	0.0083	-0.00818			-2.6641	0.0276	-2.9936	0.0329	-2.6596	0.0288	-2.8215	0.0367	-2.8067
	PRO-323	-9.9013	0.1462	-9.739	0.1594	-8.938	0.1175	-9.2193	0.1385	-9.5851	0.1006	-9.47654			5.2834	0.0779	4.9585	0.0864	4.7348	0.0815	5.4191	0.0884	5.0224	0.063	5.08364			-0.6467	0.0194	-0.7546	0.0204	-0.7382	0.017	-0.5921	0.021	-0.7965	0.0163	-0.70562			-5.2677	0.1279	-5.5338	0.1275	-4.9432	0.0912	-4.3908	0.1002	-5.3592
	ALA-324	-6.2698	0.1239	-6.9805	0.1586	-7.5532	0.1398	-6.9297	0.1446	-8.106	0.1292	-7.16784			3.7156	0.1176	4.352	0.1331	4.6998	0.1229	4.2055	0.1342	5.2655	0.1108	4.44768			-0.198	0.0139	-0.2128	0.0142	-0.2065	0.0125	-0.2132	0.0141	-0.2667	0.014	-0.21944			-2.7467	0.0623	-2.8415	0.0702	-3.0633	0.0633	-2.9437	0.0623	-3.1109
	SER-325	-26.5706	0.3567	-32.578	0.4241	-33.7139	0.5585	-29.5633	0.2741	-31.2329	0.4206	-30.7317			21.6103	0.2238	25.8896	0.357	29.0579	0.3652	22.838	0.2486	27.6206	0.2745	25.4033			-1.5362	0.015	-1.6347	0.017	-1.7447	0.0147	-1.6156	0.0171	-1.6991	0.0163	-1.64606			-6.5038	0.3939	-8.3382	0.2684	-6.3929	0.3179	-8.3319	0.294	-5.2998
	ILE-326	-26.1597	0.2396	-27.368	0.2354	-25.2265	0.2326	-28.452	0.2123	-26.3601	0.294	-26.7133			17.9206	0.2294	19.9244	0.2025	17.1297	0.2005	20.2454	0.2031	18.689	0.2437	18.7818			-0.9926	0.0193	-0.9711	0.0187	-0.9593	0.0186	-1.0028	0.0162	-1.0382	0.018	-0.9928			-9.2317	0.1892	-8.4121	0.1798	-9.0508	0.2031	-9.2149	0.1808	-8.7129
	ALA-327	-17.8034	0.1573	-18.2281	0.1716	-18.5236	0.1666	-20.5832	0.1836	-17.8978	0.1752	-18.6072			12.2513	0.1043	13.2172	0.1289	13.7799	0.0913	13.4623	0.1089	12.9611	0.0999	13.1344			-1.4568	0.0147	-1.4204	0.0153	-1.4016	0.0137	-1.5204	0.0124	-1.4959	0.0137	-1.45902			-7.0141	0.134	-6.4368	0.1538	-6.1477	0.1514	-8.6394	0.1592	-6.4301
	ASP-328	-74.3593	0.7223	-88.3311	1.0661	-105.654	0.8975	-88.3082	1.0748	-97.179	0.7919	-90.7664			70.4822	0.9484	78.0071	1.5088	113.471	1.2906	98.3045	1.0942	93.9021	1.0818	90.8333			-0.6044	0.0144	-0.7301	0.019	-0.9246	0.0169	-0.7001	0.0171	-0.817	0.0149	-0.75524			-4.4714	0.5662	-11.0395	0.6414	6.914	0.5991	9.3618	0.511	-4.0994
	GLU-329	-207.714	1.3328	-228.544	1.7063	-188.237	1.2794	-190.746	1.4242	-172.628	1.4457	-197.574			320.444	1.5193	332.506	2.2575	318.571	1.5977	341.649	1.6826	258.088	2.1963	314.252			-3.4679	0.0222	-3.436	0.022	-3.3249	0.0196	-3.4523	0.0211	-3.0139	0.02	-3.339			109.242	1.1071	100.458	1.0841	126.968	0.9989	147.365	0.9737	82.4366
[truncated: 2 more columns]

## Sheet: TPR3
Protein	#Residues	MM_Energy(+/-)dev/error													Polar_Energy(+/-)dev/error													Apolar_Energy(+/-)dev/error													Total_Energy(+/-)dev/error
		Frame1		Frame2		Frame3		Frame4		Frame5		Average			Frame1		Frame2		Frame3		Frame4		Frame5		Average			Frame1		Frame2		Frame3		Frame4		Frame5		Average			Frame1		Frame2		Frame3		Frame4		Frame5
InvF	MET-1	-28.6447	0.0779	-28.7496	0.0687	-28.2495	0.0938	-29.648	0.0998	-27.9929	0.0812	-28.6569			-0.5159	0.0998	-0.0052	0.1183	-0.5046	0.1051	-0.5677	0.1011	0.1174	0.1198	-0.2952			-0.0003	0.0054	0.0055	0.0091	-0.0096	0.0078	-0.0047	0.0078	0.0022	0.0052	-0.00138			-29.1615	0.1263	-28.75	0.1359	-28.7727	0.1331	-30.222	0.1365	-27.8743
	LEU-2	0.155	0.0044	0.1407	0.004	0.1358	0.0037	0.076	0.0094	0.1903	0.0041	0.13956			-0.0027	0.0179	-0.0028	0.0126	0.011	0.0123	-0.0561	0.0164	-0.0499	0.0208	-0.0201			0.0178	0.0106	0.0136	0.0096	0.0081	0.0095	-0.0055	0.0068	0.0015	0.0096	0.0071			0.1695	0.0207	0.152	0.0166	0.155	0.0159	0.0156	0.0212	0.1427
	ASN-3	0.2406	0.0154	0.1265	0.0138	0.1295	0.0169	-0.1338	0.0284	0.0367	0.0167	0.0799			-0.2157	0.0482	-0.0678	0.055	-0.1773	0.0498	-0.3976	0.0457	0.1067	0.0586	-0.15034			0.0034	0.0065	-0.0013	0.0048	0.001	0.0055	0.0044	0.0063	-0.0037	0.0066	0.00076			0.0281	0.0523	0.0597	0.0576	-0.0448	0.0519	-0.5264	0.0532	0.1389
	THR-4	-0.1838	0.0081	-0.2869	0.0087	-0.2705	0.0085	-0.2151	0.0114	-0.3171	0.0082	-0.25468			-0.0038	0.021	0.0069	0.0213	-0.0312	0.0201	-0.0007	0.0185	-0.054	0.022	-0.01656			0.0077	0.0089	0.0209	0.0088	0.0027	0.0071	-0.0067	0.0065	0.015	0.0065	0.00792			-0.1788	0.0248	-0.2597	0.0246	-0.299	0.0234	-0.2232	0.0236	-0.3577
	GLN-5	0.0111	0.0317	0.0278	0.0279	0.0346	0.0202	0.0326	0.0323	-0.2329	0.0141	-0.02536			-0.3121	0.0465	0.0294	0.0691	-0.4613	0.049	-0.5754	0.0481	0.1329	0.0527	-0.2373			0.0069	0.0091	-0.0037	0.0076	0.0131	0.0085	-0.0031	0.0072	-0.0153	0.0159	-0.00042			-0.2952	0.0576	0.0522	0.0696	-0.4147	0.0553	-0.5463	0.0554	-0.1157
	GLU-6	30.3692	0.0827	30.8719	0.0686	30.3084	0.1045	31.2924	0.0855	28.7996	0.0827	30.3283			-0.4929	0.112	0.1549	0.1296	-0.6224	0.1033	-0.5786	0.0833	0.1174	0.1098	-0.28432			0.0177	0.0077	0.0036	0.0067	0.0158	0.0064	0.0046	0.0055	-0.0015	0.0043	0.00804			29.8974	0.1529	31.0327	0.1412	29.7058	0.1349	30.7219	0.1202	28.9213
	VAL-7	-0.1675	0.0034	-0.1984	0.0033	-0.0778	0.0041	-0.1454	0.0043	-0.1218	0.0037	-0.14218			-0.0958	0.0232	0.012	0.0258	-0.0738	0.0141	-0.071	0.0132	0.0545	0.0183	-0.03482			0.0145	0.0073	0.0031	0.0066	-0.0325	0.0145	-0.0055	0.0124	-0.0053	0.016	-0.00514			-0.248	0.0243	-0.1822	0.0272	-0.1843	0.0192	-0.2222	0.0189	-0.0721
	LEU-8	-0.077	0.0027	-0.1044	0.0027	-0.1562	0.0035	-0.2469	0.0031	-0.2002	0.0021	-0.15694			0.0164	0.0084	-0.0182	0.0116	0.0293	0.0062	0.0005	0.0021	-0.0016	0.0024	0.00528			0.0104	0.0077	0.0119	0.0062	0.0056	0.0105	0.0014	0.0099	-0.0118	0.0095	0.0035			-0.0497	0.012	-0.1106	0.0131	-0.1212	0.013	-0.2451	0.0106	-0.2137
	LYS-9	-26.0062	0.0795	-26.2694	0.0692	-26.9082	0.0902	-28.1302	0.0774	-26.1709	0.0826	-26.697			-0.7139	0.1141	0.0411	0.1211	-0.5161	0.1022	-0.3831	0.0957	0.1332	0.1192	-0.28776			0.0016	0.0054	0.0006	0.0043	-0.0187	0.0115	-0.0057	0.0078	0.0057	0.0129	-0.0033			-26.7158	0.1341	-26.2289	0.1362	-27.4415	0.1369	-28.5205	0.1222	-26.0313
	GLU-10	25.9095	0.0672	26.3512	0.0597	25.4919	0.0966	26.2535	0.0581	25.3571	0.0635	25.8726			-0.394	0.0953	-0.1832	0.1149	-0.7188	0.0884	-0.6679	0.092	0.2434	0.0924	-0.3441			-0.0069	0.0063	0.0048	0.0057	-0.0225	0.0097	-0.0126	0.0121	-0.0162	0.0121	-0.01068			25.5075	0.1153	26.1669	0.1247	24.7498	0.1274	25.5721	0.1158	25.5847
	GLY-11	-0.0289	0.005	-0.0493	0.0047	0.0333	0.0033	0.0065	0.0044	-0.0108	0.0041	-0.00984			-0.1139	0.0198	0.0264	0.0235	-0.1244	0.0205	-0.1139	0.019	-0.0123	0.0234	-0.06762			0.0036	0.0097	-0.0012	0.0102	0.0157	0.0068	0.0021	0.0066	-0.0078	0.0076	0.00248			-0.1387	0.0238	-0.0243	0.0249	-0.0757	0.022	-0.1055	0.0212	-0.0308
	GLU-12	28.4243	0.0801	29.6495	0.0674	27.779	0.0854	27.612	0.056	25.2728	0.0739	27.7475			-0.1761	0.0907	0.1179	0.0772	-0.7776	0.0809	-0.3568	0.0792	0.0733	0.1087	-0.22386			-0.0106	0.008	-0.002	0.0069	-0.0049	0.0061	-0.0092	0.0076	0.0004	0.006	-0.00526			28.2362	0.1212	29.7704	0.1064	27.0004	0.1149	27.2493	0.093	25.3492
	LYS-13	-27.3116	0.0756	-27.7606	0.0682	-26.6656	0.1071	-27.6546	0.0674	-25.7693	0.0931	-27.0323			-0.4247	0.107	-0.0303	0.1128	-0.7514	0.1127	-0.6439	0.0977	0.2913	0.102	-0.3118			0.0061	0.0081	0.0044	0.0073	0.0023	0.0075	-0.0085	0.0076	0.0175	0.0117	0.00436			-27.7293	0.1346	-27.7846	0.1399	-27.4131	0.1504	-28.3096	0.1204	-25.4607
	ARG-14	-31.0744	0.0806	-31.6186	0.0812	-30.1884	0.1185	-29.6781	0.0856	-28.301	0.0864	-30.1721			-0.2137	0.046	-0.0671	0.0233	0.0147	0.0281	-0.2928	0.0402	0.0268	0.0385	-0.10642			-0.0075	0.0104	0.0065	0.0081	-0.0037	0.0078	0.0051	0.0084	-0.0172	0.0101	-0.00336			-31.2972	0.0882	-31.6801	0.0845	-30.1681	0.1226	-29.9679	0.0958	-28.2879
	LYS-15	-28.2531	0.0907	-28.6519	0.0771	-28.3836	0.1208	-29.2691	0.0927	-27.5469	0.1096	-28.4209			-0.5994	0.1147	-0.3994	0.1242	-0.7256	0.1072	-0.7528	0.1153	0.2058	0.1189	-0.45428			-0.0083	0.008	0.0092	0.0095	-0.0076	0.0055	-0.006	0.0067	0.0123	0.0095	-8e-05			-28.8599	0.1435	-29.0395	0.1389	-29.1141	0.1662	-30.0251	0.1449	-27.33
	ILE-16	0.1897	0.0039	0.2041	0.0053	0.0512	0.0041	0.0805	0.0053	0.0521	0.0042	0.11552			-0.0319	0.0166	0.0004	0.0211	-0.0138	0.006	-0.0041	0.0058	-0.0028	0.009	-0.01044			0.0023	0.0084	0.0008	0.009	-0.0183	0.0076	-0.0011	0.0066	0.0065	0.0078	-0.00196			0.1608	0.0191	0.2056	0.024	0.0188	0.0113	0.0752	0.0112	0.0561
	ARG-17	-33.7807	0.1291	-33.97	0.1147	-31.9051	0.115	-34.3703	0.0987	-31.2652	0.121	-33.0583			-0.2612	0.0539	0.0371	0.06	-0.3841	0.0503	-0.5815	0.054	0.0455	0.0712	-0.22884			-0.0257	0.0109	-0.0194	0.0118	0.0123	0.0057	0.0049	0.0055	0.0029	0.0097	-0.005			-34.0791	0.1247	-33.9535	0.1215	-32.2807	0.1337	-34.9485	0.1132	-31.2142
	SER-18	0.1191	0.0073	0.1194	0.0094	0.007	0.0139	-0.1599	0.0185	0.0865	0.0045	0.03442			-0.1153	0.0233	-0.0244	0.0272	-0.191	0.0309	-0.1709	0.0236	0.0151	0.0248	-0.0973			0.0015	0.0071	0.0078	0.0059	-0.0028	0.0037	0	0.0029	-0.0015	0.0023	0.001			0.0057	0.0255	0.1005	0.0305	-0.1848	0.0353	-0.3295	0.0306	0.1003
	PRO-19	0.2788	0.0062	0.3206	0.0072	0.3155	0.0064	0.3031	0.0078	0.3178	0.0062	0.30716			0.0012	0.0111	-0.0092	0.0118	-0.0157	0.0099	-0.0426	0.0123	-0.0058	0.0131	-0.01442			-0.0351	0.0138	0.0567	0.0154	0.0242	0.0126	0.0392	0.0128	0.0504	0.0163	0.02708			0.2458	0.0189	0.3675	0.0202	0.3238	0.0182	0.3002	0.0189	0.3621
	GLU-20	35.8254	0.1125	37.6417	0.1014	37.1253	0.1504	38.6185	0.1096	35.1716	0.1126	36.8765			-0.1752	0.0866	-0.0197	0.103	-0.5536	0.1018	-0.3948	0.0793	0.0481	0.0675	-0.21904			0.0108	0.0053	0.001	0.0041	0.0056	0.0045	-0.0059	0.0049	0.0062	0.0046	0.00354			35.6561	0.1407	37.6268	0.1439	36.5715	0.1758	38.2231	0.1344	35.2261
	ALA-21	0.4021	0.0064	0.5312	0.0074	0.4526	0.007	0.4918	0.0065	0.4193	0.0063	0.4594			-0.0123	0.0059	-0.0469	0.0057	-0.0079	0.0062	-0.0029	0.0068	-0.0201	0.0045	-0.01802			-0.0188	0.0067	0.0012	0.0082	-0.0162	0.0103	-0.0136	0.0107	-0.0121	0.0082	-0.0119			0.3708	0.0105	0.4853	0.0121	0.4283	0.0134	0.4754	0.0139	0.3871
	TRP-22	-0.2563	0.0089	-0.2887	0.0098	-0.2823	0.0091	-0.2272	0.01	-0.233	0.0091	-0.2575			-0.0221	0.0103	0.011	0.0131	-0.0312	0.0114	0.0349	0.0063	-0.0085	0.0045	-0.00318			0.0037	0.0087	-0.0079	0.0067	-0.003	0.0048	-0.0043	0.0046	-0.0074	0.0049	-0.00378			-0.2747	0.0161	-0.2854	0.016	-0.3164	0.0149	-0.1972	0.012	-0.2495
	PHE-23	-0.0381	0.0067	-0.0357	0.0071	0.0044	0.0068	0.0272	0.0063	0.0361	0.0059	-0.00122			-0.0192	0.0031	-0.0125	0.0023	-0.0177	0.0013	-0.0219	0.0021	-0.0106	0.0015	-0.01638			0.003	0.003	-0.0009	0.0038	0.0009	0.0041	-0.0001	0.0023	-0.0081	0.0048	-0.00104			-0.0542	0.0071	-0.0493	0.0073	-0.0121	0.0081	0.0052	0.0072	0.0169
	ILE-24	-0.0907	0.0045	-0.1539	0.0066	-0.1016	0.0057	-0.0682	0.0048	-0.1001	0.0036	-0.1029			-0.0105	0.0023	-0.0177	0.0131	-0.0012	0.0019	-0.0001	0.0014	-0.007	0.0034	-0.0073			0.0017	0.0085	-0.0257	0.0115	-0.0238	0.007	-0.0147	0.0078	-0.0064	0.0103	-0.01378			-0.0994	0.0102	-0.1979	0.0179	-0.1262	0.009	-0.0827	0.0094	-0.1138
	GLN-25	0.1223	0.0112	0.4422	0.0156	0.4366	0.0141	-0.3365	0.0219	0.2822	0.0155	0.18936			-0.01	0.007	-0.0158	0.0281	-0.0112	0.0211	-0.0327	0.0253	0.0265	0.0232	-0.00864			-0.0041	0.0039	0.0038	0.0083	-0.0055	0.0082	0.0044	0.009	-0.0078	0.0105	-0.00184			0.1076	0.0141	0.4296	0.0335	0.4183	0.026	-0.3647	0.0383	0.3002
	THR-26	0.4247	0.0069	0.4403	0.0101	0.5401	0.0094	0.3819	0.0105	0.4777	0.0062	0.45294			-0.0528	0.0149	0.0302	0.036	-0.0176	0.0102	-0.2925	0.0305	0.002	0.0115	-0.06614			-0.0029	0.0044	-0.0158	0.0087	-0.0069	0.0061	-0.0131	0.0083	0.0072	0.0066	-0.0063			0.3689	0.018	0.457	0.0378	0.5158	0.0153	0.0759	0.0328	0.4863
	CYS-27	0.2948	0.0081	0.4115	0.0076	0.4571	0.0114	0.2772	0.0056	0.4265	0.0058	0.37342			-0.078	0.0187	-0.0142	0.0188	-0.0378	0.0141	-0.0898	0.0165	0.0067	0.0142	-0.04262			0.0108	0.0059	0.0087	0.0069	-0.0191	0.0082	0.0006	0.0046	-0.0078	0.0076	-0.00136			0.2287	0.0211	0.4066	0.0213	0.3998	0.021	0.1877	0.0177	0.4243
	SER-28	0.0514	0.0075	0.0227	0.0129	-0.0633	0.0152	-0.1994	0.012	-0.0186	0.0061	-0.04144			-0.0728	0.0131	-0.0297	0.0316	-0.1045	0.0277	-0.3219	0.0314	0.017	0.0166	-0.10238			-0.0001	0.0019	0.0011	0.003	-0.0028	0.0034	0	0.0019	0.0012	0.0022	-0.00012			-0.021	0.0149	-0.0051	0.0318	-0.1698	0.0293	-0.5208	0.0334	-0.0005
	ALA-29	-0.0985	0.0054	-0.0928	0.0085	-0.2089	0.0073	-0.3153	0.0046	-0.0953	0.0057	-0.16216			-0.0524	0.0214	-0.0061	0.0247	-0.0898	0.0192	-0.0764	0.016	0.0179	0.0247	-0.04136			0.0048	0.0028	0.0037	0.0045	0.0029	0.0061	-0.0064	0.0051	-0.0053	0.0026	-6e-05			-0.1467	0.0223	-0.0954	0.0266	-0.2958	0.0213	-0.3974	0.0175	-0.0835
	GLN-30	-0.1473	0.0131	0.0568	0.0226	-0.1618	0.0149	-0.3308	0.0048	-0.1111	0.0138	-0.13884			-0.2731	0.0519	0.0289	0.0738	-0.4188	0.0473	-0.2882	0.0455	0.1272	0.0599	-0.1648			0.0077	0.0048	-0.0027	0.0056	-0.0093	0.0058	0.0097	0.0047	0.0028	0.0054	0.00164			-0.4105	0.0556	0.0844	0.0687	-0.5888	0.0504	-0.6109	0.0466	0.0179
	LYS-31	-25.367	0.1095	-25.5541	0.1114	-25.3471	0.1185	-26.6766	0.0841	-25.5448	0.1019	-25.6979			-0.4081	0.1046	0.0155	0.1207	-0.7983	0.1102	-0.9659	0.1152	0.0096	0.1124	-0.42944			-0.0053	0.0058	-0.0179	0.007	0.0001	0.0081	-0.0009	0.0079	0.0038	0.0048	-0.00404			-25.7861	0.1481	-25.5498	0.1688	-26.1371	0.162	-27.6398	0.1402	-25.5396
	LEU-32	0.0777	0.0036	0.0564	0.0071	0.0398	0.0036	0.0635	0.0034	0.0415	0.0062	0.05578			-0.0082	0.0045	-0.0118	0.0068	-0.0126	0.0035	-0.0011	0.0028	0.0031	0.0064	-0.00612			-0.0038	0.0103	0.0057	0.0097	0.0074	0.0101	0.0204	0.0084	-0.0052	0.0107	0.0049			0.0658	0.0112	0.0512	0.0143	0.0348	0.0118	0.0823	0.0092	0.0398
	HIS-33	0.1501	0.0111	0.1214	0.0131	0.2468	0.0104	0.0985	0.007	0.0903	0.0117	0.14142			-0.4276	0.0592	-0.0701	0.0652	-0.3527	0.0493	-0.1067	0.0332	0.1252	0.055	-0.16638			0.0114	0.0079	-0.0019	0.0087	-0.0116	0.0087	-0.0027	0.0063	-0.0052	0.0088	-0.002			-0.265	0.0638	0.0491	0.0707	-0.1134	0.0538	-0.0097	0.0341	0.2086
	MET-34	0.0078	0.0072	-0.0196	0.0067	-0.1248	0.0065	-0.1566	0.0056	-0.0763	0.0071	-0.0739			-0.0249	0.0042	-0.0042	0.005	-0.0326	0.0059	-0.0425	0.0066	-0.0123	0.0043	-0.0233			-0.0007	0.0067	-0.0015	0.0075	-0.0017	0.0102	0.0017	0.0117	-0.0043	0.0108	-0.0013			-0.0174	0.0105	-0.025	0.0105	-0.1598	0.0132	-0.1973	0.0144	-0.0934
	SER-35	0.0458	0.0064	0.1488	0.0055	0.0257	0.0076	-0.1395	0.0054	-0.0776	0.0058	0.00064			-0.1497	0.0298	-0.0162	0.0285	-0.1393	0.0271	-0.0442	0.0208	0.0296	0.0349	-0.06396			0.0029	0.0044	0.0055	0.0059	-0.007	0.0062	-0.0007	0.005	0.0132	0.0052	0.00278			-0.1008	0.0292	0.1383	0.0283	-0.1218	0.0291	-0.1842	0.0215	-0.0348
	PHE-36	-0.174	0.0056	-0.2082	0.004	-0.1504	0.0044	-0.1893	0.0049	-0.176	0.006	-0.17958			-0.0093	0.0118	0.0176	0.0126	0.0022	0.0121	-0.0279	0.0159	0.0018	0.0123	-0.00312			0	0.0094	0.0196	0.0077	0.0108	0.0078	-0.0058	0.0064	0.0153	0.0066	0.00798			-0.1831	0.0162	-0.1712	0.0159	-0.1368	0.0145	-0.2226	0.019	-0.1598
	SER-37	0.1206	0.0066	0.0122	0.0062	0.0384	0.0064	0.0107	0.0052	0.0647	0.0048	0.04932			-0.1046	0.0268	-0.0386	0.027	-0.0564	0.0234	-0.09	0.0234	-0.0017	0.0258	-0.05826			-0.0044	0.005	0.002	0.0037	-0.013	0.0045	-0.0037	0.0042	-0.0035	0.0082	-0.00452			0.0113	0.0258	-0.0241	0.028	-0.0299	0.023	-0.0837	0.0241	0.0597
	GLU-38	28.6476	0.0944	28.7992	0.0813	27.9222	0.1265	28.7498	0.0813	26.9839	0.1151	28.2205			-0.6068	0.1124	-0.101	0.1286	-0.5595	0.097	-0.7861	0.1018	-0.0904	0.1033	-0.42876			0.0063	0.0048	-0.0134	0.005	-0.0011	0.0038	0.0027	0.0029	0.0025	0.0056	-0.0006			28.0497	0.1487	28.6837	0.151	27.3551	0.1642	27.9631	0.13	26.9029
	SER-39	-0.0015	0.0125	0.091	0.0104	-0.067	0.0115	-0.1422	0.0113	-0.0348	0.0104	-0.0309			-0.1099	0.0293	-0.008	0.0247	-0.0238	0.0252	-0.1268	0.0243	-0.0243	0.027	-0.05856			-0.0149	0.0098	-0.0135	0.0071	-0.0028	0.005	0.0139	0.0062	0.0006	0.0053	-0.00334			-0.126	0.0337	0.0689	0.029	-0.0945	0.0271	-0.2549	0.028	-0.0588
	ARG-40	-28.3838	0.1305	-27.7696	0.1021	-28.0679	0.156	-29.784	0.1321	-27.948	0.1763	-28.3907			-0.0079	0.0472	0.1409	0.0587	-0.2722	0.0495	-0.3315	0.0517	0.1603	0.0648	-0.06208			0.0001	0.009	0.0055	0.0079	0.0015	0.0041	-0.0044	0.0041	0.0022	0.0079	0.00098			-28.3953	0.1326	-27.6227	0.1177	-28.3384	0.1632	-30.1279	0.1359	-27.7867
	HIS-41	0.6475	0.012	0.441	0.0105	-0.7122	0.0722	-1.217	0.0242	-0.5737	0.0229	-0.28288			-0.3223	0.0251	-0.1165	0.0199	0.1764	0.0452	0.4358	0.0309	0.2607	0.0275	0.08682			0.0009	0.0048	0.0049	0.0031	0.0139	0.0062	0.0019	0.0062	0.0083	0.0046	0.00598			0.3268	0.026	0.3285	0.0215	-0.5232	0.0543	-0.7798	0.0351	-0.3041
	ASN-42	-0.4059	0.0324	-0.5348	0.0241	0.0593	0.0306	0.3339	0.0274	-0.6094	0.0365	-0.23138			-0.3155	0.0619	0.1713	0.0479	-0.599	0.0504	-0.6178	0.0484	0.3828	0.0617	-0.19564			-0.0037	0.0033	0.0052	0.003	0.0022	0.003	0.0006	0.0032	0.0043	0.0031	0.00172			-0.7279	0.0655	-0.3574	0.0532	-0.5386	0.0586	-0.2839	0.0552	-0.2197
	GLU-43	26.2544	0.1107	26.7512	0.1074	26.3826	0.1376	28.0719	0.0893	26.297	0.1248	26.7514			-0.5559	0.1035	0.0627	0.1402	-0.6061	0.0997	-0.8954	0.0885	-0.0254	0.1129	-0.40402			-0.0013	0.0029	0.0084	0.0034	0.0037	0.0043	0.0049	0.0062	-0.0046	0.0048	0.00222			25.6996	0.1499	26.8178	0.1612	25.7765	0.1561	27.1775	0.1215	26.2703
	ASN-44	0.466	0.013	0.5268	0.0124	0.5249	0.0155	0.5666	0.0093	0.1855	0.0195	0.45396			-0.166	0.0363	-0.0127	0.0325	-0.1499	0.0397	-0.2499	0.0425	0.1032	0.0526	-0.09506			-0.0029	0.0039	-0.0072	0.0042	-0.0086	0.005	0.0047	0.005	-0.008	0.0073	-0.0044			0.2961	0.0375	0.5062	0.0354	0.3655	0.0426	0.3217	0.0418	0.28
	CYS-45	0.0012	0.0091	0.0048	0.0083	-0.0187	0.0077	-0.0508	0.0064	-0.0379	0.006	-0.02028			0.0181	0.0128	0.0138	0.0249	-0.16	0.0285	-0.2219	0.0265	0.049	0.0277	-0.0602			-0.0079	0.0069	-0.0102	0.0081	-0.0039	0.0092	0.0094	0.0069	0.017	0.0086	0.00088			0.0116	0.0177	0.0083	0.0267	-0.1827	0.0311	-0.2616	0.0289	0.0293
	LEU-46	0.2987	0.0049	0.3622	0.0058	0.0779	0.008	0.1003	0.0068	0.0903	0.0063	0.18588			0.0147	0.0025	-0.0083	0.009	0.0057	0.0039	0.0048	0.0045	-0.0055	0.0063	0.00228			0.0083	0.0073	-0.0117	0.0101	0.0152	0.0122	-0.0032	0.0105	-0.0034	0.0112	0.00104			0.3219	0.009	0.3426	0.0143	0.0996	0.0156	0.1019	0.0126	0.0823
	ILE-47	0.4012	0.0066	0.4282	0.0072	0.3551	0.0064	0.3014	0.0074	0.3127	0.0071	0.35972			-0.0288	0.0116	-0.0256	0.0154	0.0298	0.0108	0.0023	0.0127	0.0203	0.0153	-0.0004			-0.0021	0.0088	-0.0024	0.0112	-0.0041	0.0111	-0.0095	0.0114	0.0136	0.0108	-0.0009			0.3704	0.0165	0.3995	0.0196	0.3801	0.0184	0.2943	0.0185	0.347
	GLN-48	0.4227	0.0297	0.4428	0.0396	0.6575	0.045	0.5205	0.043	0.3731	0.0467	0.48332			-0.1273	0.0524	0.014	0.0669	-0.4246	0.054	-0.3428	0.047	0.0127	0.0608	-0.1736			0.004	0.0135	0.008	0.013	0.0158	0.0085	-0.0248	0.0098	0.0004	0.0087	0.00068			0.3001	0.0631	0.4661	0.0812	0.2496	0.0738	0.1487	0.0698	0.3853
	GLU-49	27.2799	0.1536	27.7585	0.1468	27.0941	0.1688	28.6898	0.1295	22.9735	0.2483	26.7592			-0.2574	0.047	-0.1072	0.0684	-0.4771	0.078	-0.5715	0.0664	-0.3213	0.1184	-0.3469			0.0275	0.0083	-0.0233	0.0097	0.0094	0.0105	-0.0234	0.0136	0.0069	0.0065	-0.00058			27.0474	0.1514	27.6348	0.1577	26.6199	0.1886	28.0965	0.1496	22.6571
	GLY-50	0.1661	0.0108	-0.0189	0.0159	-0.2012	0.0099	-0.1229	0.0082	-0.1506	0.0081	-0.0655			0.051	0.0042	0.0256	0.0031	0.0096	0.0028	0.0208	0.0021	0.0099	0.0021	0.02338			0.0017	0.0013	-0.004	0.0027	-0.0098	0.0037	0.0006	0.0033	-0.0064	0.0035	-0.00358			0.2186	0.0124	0.0021	0.0169	-0.2014	0.0114	-0.1014	0.0093	-0.1467
	ALA-51	0.2259	0.0064	0.1897	0.0072	0.1686	0.0056	0.1509	0.0052	0.1468	0.0041	0.17638			0.0002	0.0028	-0.0149	0.0064	-0.0025	0.0014	-0.0125	0.002	0.0081	0.0016	-0.00432			0.0135	0.0056	-0.0088	0.0055	-0.0181	0.0052	-0.0118	0.0076	-0.0105	0.0045	-0.00714			0.2393	0.0089	0.1662	0.0117	0.1482	0.0074	0.1262	0.0098	0.1443
	LEU-52	0.0209	0.0049	-0.0103	0.0059	-0.0502	0.0059	-0.046	0.0055	-0.0264	0.0048	-0.0224			0.0069	0.0031	0.018	0.0034	-0.0262	0.0037	-0.0068	0.0036	-0.0214	0.0037	-0.0059			-0.0065	0.0061	0.0027	0.0087	0.0045	0.012	0.0051	0.0084	0.0085	0.0121	0.00286			0.021	0.0089	0.0108	0.0112	-0.0714	0.013	-0.0473	0.0109	-0.0399
	LEU-53	0.1494	0.0045	0.1721	0.0057	0.1156	0.0048	0.1313	0.006	0.1273	0.0042	0.13914			0.0044	0.0024	-0.013	0.0027	0.0012	0.002	-0.005	0.0029	0.0088	0.0026	-0.00072			0.0037	0.0081	-0.0299	0.0088	-0.0005	0.0063	0.0205	0.0095	0.009	0.0099	0.00056			0.1578	0.0097	0.1291	0.0107	0.1163	0.0083	0.1466	0.0112	0.1453
	PHE-54	0.3112	0.008	0.3954	0.0094	0.4569	0.0079	0.5152	0.0079	0.3426	0.0079	0.40426			0.0338	0.0093	-0.026	0.0097	0.145	0.0111	0.1189	0.0103	0.0759	0.0095	0.06952			0.0015	0.006	0.0125	0.0063	-0.013	0.0085	-0.0013	0.008	0.0004	0.0053	2e-05			0.3466	0.0115	0.3817	0.0126	0.5891	0.014	0.6334	0.014	0.4193
	CYS-55	-0.0343	0.009	0.0272	0.0112	-0.0144	0.0104	0.0125	0.0108	0.0016	0.0075	-0.00148			-0.0211	0.0124	-0.0251	0.0146	0.004	0.0116	0.0168	0.0107	-0.0229	0.0123	-0.00966			0.0005	0.0084	-0.0087	0.0066	-0.0107	0.0077	0.0174	0.0084	-0.0035	0.0094	-0.001			-0.0549	0.0174	-0.0061	0.02	-0.02	0.0174	0.0471	0.0175	-0.0251
	GLU-56	37.2241	0.1249	38.0238	0.1102	38.2997	0.1509	40.2537	0.1138	35.9904	0.1421	37.9583			0.1358	0.0564	0.0209	0.0576	-0.0522	0.0722	0.0775	0.0719	0.4438	0.085	0.12516			-0.0203	0.0094	-0.0249	0.0106	0.0059	0.0065	-0.0038	0.0051	0.015	0.0078	-0.00562			37.3291	0.1191	38.023	0.1179	38.2543	0.146	40.3307	0.1317	36.4509
	GLN-57	0.1624	0.0215	-0.0259	0.022	-0.3326	0.0181	-0.3032	0.024	-0.1635	0.0193	-0.13256			-0.2305	0.0486	-0.0789	0.0542	-0.4311	0.0523	-0.4315	0.0501	-0.0281	0.057	-0.24002			0.0004	0.0069	-0.0038	0.0063	0.0024	0.0061	0.0093	0.0078	-0.0128	0.0097	-0.0009			-0.0687	0.0553	-0.1074	0.0606	-0.7616	0.0547	-0.7239	0.0551	-0.2055
	ALA-58	-0.1721	0.0052	-0.1866	0.0051	-0.0382	0.003	-0.0424	0.0034	-0.0542	0.0027	-0.0987			0.0043	0.0057	0.0036	0.0071	-0.0595	0.0113	-0.0424	0.0092	0.0022	0.0072	-0.01836			0.0244	0.007	-0.0263	0.0083	-0.0097	0.0043	0.0104	0.0056	-0.0017	0.0053	-0.00058			-0.1434	0.0106	-0.2092	0.0117	-0.1073	0.0116	-0.0743	0.0109	-0.0531
	VAL-59	-0.1292	0.0039	-0.1488	0.0041	-0.134	0.0035	-0.1587	0.0041	-0.0961	0.0035	-0.13336			-0.0254	0.0038	-0.0006	0.0049	0.017	0.006	0.0137	0.0066	-0.012	0.0076	-0.00146			-0.0072	0.0094	0.0093	0.0085	-0.0134	0.0062	-0.0128	0.0062	0.0044	0.0084	-0.00394			-0.1623	0.0112	-0.1398	0.0108	-0.1304	0.0098	-0.1577	0.0104	-0.1037
	VAL-60	-0.1494	0.0033	-0.1585	0.0035	-0.1337	0.0027	-0.157	0.0032	-0.1255	0.003	-0.14482			0.0046	0.0031	-0.0018	0.0036	0.0059	0.0025	-0.0025	0.0026	0.0093	0.0025	0.0031			-0.0064	0.0074	-0.0062	0.0086	0.0058	0.0077	0.025	0.0094	0.0184	0.0099	0.00732			-0.1511	0.008	-0.1664	0.0095	-0.1217	0.0088	-0.1344	0.0103	-0.0978
	ALA-61	0.0063	0.0025	0.018	0.0025	0.0797	0.0028	0.057	0.0031	0.063	0.0026	0.0448			0.0106	0.0033	0.003	0.0034	-0.0206	0.0086	-0.0624	0.0109	0.0063	0.0038	-0.01262			-0.0002	0.0057	0.0051	0.0081	-0.0049	0.0068	-0.0092	0.0079	-0.0006	0.0061	-0.00196			0.0164	0.007	0.026	0.009	0.0538	0.0109	-0.014	0.0126	0.069
	PRO-62	-0.1813	0.0026	-0.1894	0.0027	-0.197	0.0024	-0.1615	0.0029	-0.1801	0.0024	-0.18186			-0.0313	0.0181	-0.0041	0.0178	-0.013	0.0098	-0.1078	0.0139	0.0133	0.0118	-0.02858			0.0011	0.0041	0.0031	0.005	0.0067	0.0071	-0.0143	0.0058	-0.0016	0.0065	-0.001			-0.2113	0.0181	-0.1908	0.0188	-0.203	0.0116	-0.2836	0.0153	-0.1689
	VAL-63	0.047	0.0025	0.0509	0.0028	0.0791	0.002	-0.0278	0.004	-0.2846	0.0028	-0.02708			-0.0475	0.0083	0.0025	0.0094	-0.0141	0.007	-0.0037	0.0053	0.0288	0.0149	-0.0068			0.022	0.0098	0	0.0124	0.0094	0.0115	0.0024	0.0078	-0.0252	0.012	0.00172			0.0219	0.0129	0.0538	0.0168	0.0738	0.0133	-0.0288	0.0107	-0.2809
	SER-64	0.0195	0.0065	0.0248	0.0069	0.0154	0.0061	0.0265	0.0061	0.1674	0.0051	0.05072			-0.1708	0.0392	-0.0495	0.0457	-0.0607	0.0294	-0.1453	0.0335	-0.0297	0.0299	-0.0912			-0.0109	0.0076	0.0035	0.0077	0.0063	0.0105	0.0087	0.0115	-0.0087	0.0116	-0.00022			-0.1599	0.0417	-0.0209	0.0457	-0.0389	0.0317	-0.1097	0.0341	0.1284
	GLY-65	0.0581	0.0039	0.089	0.0026	0.0607	0.0023	0.0398	0.0031	0.2793	0.0034	0.10538			-0.0023	0.0057	0.0109	0.0056	-0.0348	0.0066	-0.0095	0.0052	-0.0037	0.0183	-0.00788			-0.003	0.0045	0.004	0.0039	-0.0015	0.0035	0.0043	0.0042	0.0098	0.01	0.00272			0.0524	0.0087	0.1038	0.007	0.0244	0.0074	0.0343	0.0078	0.2852
	ASP-66	28.5535	0.0903	29.3854	0.0848	29.5391	0.1203	31.0822	0.0858	28.53	0.0933	29.418			-0.1576	0.0586	-0.0969	0.0627	-0.4065	0.0651	-0.1034	0.034	-0.0214	0.0518	-0.15716			0.0035	0.0061	0.0016	0.0054	-0.0068	0.0048	-0.008	0.004	-0.0024	0.0034	-0.00242			28.399	0.104	29.2897	0.1039	29.1288	0.1419	30.9721	0.0911	28.5078
	LEU-67	0.0488	0.0026	0.0343	0.0024	0.0298	0.0026	0.0488	0.0026	0.0298	0.0023	0.0383			0.0007	0.0023	0.0052	0.002	-0.0001	0.0025	0.0026	0.0016	-0.0008	0.0017	0.00152			-0.012	0.0125	0.0021	0.0112	0.0212	0.0136	-0.0077	0.0084	-0.0082	0.009	-0.00092			0.0378	0.0131	0.0419	0.011	0.0515	0.0146	0.0441	0.0093	0.0211
	VAL-68	0.06	0.0052	0.0914	0.0058	0.0313	0.0052	0.0559	0.005	0.003	0.0042	0.04832			-0.0008	0.0036	-0.0064	0.0023	-0.0021	0.001	0.0078	0.0036	-0.0044	0.0024	-0.00118			0.0001	0.0091	0.0069	0.0077	-0.0011	0.0103	-0.0114	0.0147	-0.0106	0.0156	-0.00322			0.0593	0.0111	0.0924	0.0099	0.0282	0.0113	0.0523	0.0159	-0.0123
	PHE-69	0.2524	0.005	0.2633	0.0059	0.1844	0.0047	0.1703	0.0045	0.1549	0.0046	0.20506			-0.0369	0.0161	-0.0013	0.0062	0.0035	0.005	-0.0432	0.0147	-0.0044	0.0126	-0.01646			-0.0158	0.0095	-0.0083	0.0086	0.0189	0.0088	-0.0017	0.0092	-0.0001	0.008	-0.0014			0.1995	0.0199	0.2534	0.0124	0.2063	0.0104	0.1255	0.0175	0.1504
	ARG-70	-36.4461	0.1881	-39.0675	0.1446	-38.9411	0.1839	-45.2081	0.1664	-37.1009	0.1501	-39.3527			-0.1564	0.0459	0.1749	0.0438	0.0365	0.0408	0.0523	0.0408	0.1055	0.0478	0.04256			0.0205	0.0106	-0.0243	0.0104	0.0022	0.0092	-0.008	0.0066	-0.0032	0.0087	-0.00256			-36.587	0.1999	-38.9167	0.1394	-38.8934	0.1794	-45.1739	0.1619	-37.0039
	PRO-71	0.2467	0.0053	0.2868	0.0061	0.3026	0.006	0.3327	0.0054	0.2847	0.0062	0.2907			-0.0375	0.0136	-0.0231	0.0119	-0.0303	0.0107	-0.057	0.0123	-0.0028	0.0144	-0.03014			0.0225	0.0098	0.0001	0.009	0.0124	0.0088	-0.0165	0.0085	-0.0045	0.0165	0.0028			0.2319	0.0167	0.2639	0.0165	0.285	0.0155	0.2581	0.0157	0.2779
	LEU-72	-0.1515	0.0051	-0.2021	0.0072	-0.1335	0.0069	-0.1938	0.0072	-0.0888	0.0077	-0.15394			-0.0639	0.0117	0.0197	0.0133	-0.0616	0.0118	-0.0647	0.0116	0.0241	0.0128	-0.02928			0.0178	0.0077	-0.0056	0.0066	-0.0052	0.0066	-0.0139	0.0055	0.009	0.0085	0.00042			-0.1979	0.0141	-0.188	0.0157	-0.2005	0.0138	-0.2723	0.0133	-0.0562
	LYS-73	-53.4496	0.3069	-56.7823	0.3416	-54.8067	0.3814	-55.5558	0.3515	-51.2955	0.2861	-54.378			0.9517	0.1222	1.6507	0.1462	0.7117	0.1291	-0.0009	0.1205	1.2219	0.1221	0.90702			0.0006	0.0073	0.0126	0.0085	0.005	0.0091	-0.006	0.0076	0.0024	0.0051	0.00292			-52.5053	0.27	-55.1192	0.2937	-54.0892	0.3326	-55.5692	0.3183	-50.0623
	ILE-74	0.2485	0.0102	0.3886	0.0156	0.1985	0.0113	0.2583	0.0115	0.128	0.0119	0.24438			0.1095	0.0133	-0.0335	0.0154	0.0779	0.0148	0.1015	0.0142	0.0698	0.0143	0.06504			0.0086	0.0127	0.0485	0.0117	0.0206	0.0125	0.0185	0.0115	0.0389	0.0119	0.02702			0.3672	0.0195	0.4029	0.0192	0.2982	0.021	0.3786	0.0212	0.2372
	GLU-75	46.5579	0.1893	50.5937	0.1614	49.0512	0.2029	51.6361	0.177	46.9382	0.1832	48.9554			-0.6423	0.1075	-0.9987	0.1094	-0.7531	0.1121	-1.0711	0.0986	-0.6723	0.1063	-0.8275			-0.0004	0.0038	-0.0163	0.0056	0.0016	0.004	0.0068	0.0049	0.0028	0.0058	-0.0011			45.9168	0.1821	49.5794	0.1679	48.293	0.2024	50.5724	0.1894	46.2729
	VAL-76	0.0737	0.0171	0.4448	0.0246	0.0929	0.0184	0.3531	0.0178	0.1979	0.0182	0.23248			0.3013	0.0143	-0.0514	0.0161	0.2753	0.0123	0.209	0.0131	0.1088	0.012	0.1686			0.0084	0.0121	0.0631	0.0154	-0.0054	0.0123	0.0128	0.0107	0.0015	0.0098	0.01608			0.3844	0.0185	0.4557	0.0205	0.3629	0.019	0.5752	0.017	0.3095
	LEU-77	-0.692	0.0139	-0.3396	0.025	-0.674	0.0155	-0.4666	0.0176	-0.6884	0.016	-0.57212			0.5917	0.0104	0.3415	0.0146	0.5669	0.0095	0.653	0.0117	0.4863	0.0125	0.52788			-0.0634	0.0152	-0.0064	0.0143	-0.0243	0.0168	-0.0327	0.0179	-0.0287	0.0167	-0.0311			-0.1632	0.0201	-0.004	0.0196	-0.1311	0.0209	0.1538	0.0226	-0.2317
	SER-78	-0.2554	0.014	0.0139	0.0209	-0.2323	0.0154	-0.0602	0.018	-0.2296	0.0169	-0.15272			0.5644	0.0357	0.329	0.039	0.4858	0.0319	0.5532	0.0329	0.4774	0.0337	0.48196			0.0054	0.0041	0.0101	0.006	-0.0047	0.0049	0.0017	0.006	0.0004	0.0057	0.00258			0.3146	0.0366	0.3507	0.0373	0.2469	0.0346	0.4954	0.0356	0.2489
	LYS-79	-53.5675	0.2176	-57.9429	0.234	-56.1247	0.2176	-59.2252	0.2051	-53.9382	0.2114	-56.1597			1.5615	0.1502	3.9736	0.1829	1.3007	0.1488	2.437	0.1576	3.5379	0.1757	2.56214			0.0134	0.0115	0.0102	0.0101	0.0352	0.0116	-0.0306	0.0101	-0.0058	0.0108	0.00448			-51.9987	0.1968	-53.9604	0.2097	-54.7775	0.2422	-56.8287	0.2148	-50.4096
	LEU-80	-2.6706	0.0305	-1.9949	0.0429	-2.5884	0.0308	-2.464	0.0341	-2.3949	0.0312	-2.42256			2.0717	0.0253	1.5347	0.0295	1.8912	0.0226	2.1861	0.0254	1.7911	0.0275	1.89496			-0.0403	0.0123	-0.0306	0.014	-0.0215	0.0106	-0.017	0.0117	-0.0152	0.0111	-0.02492			-0.6387	0.0242	-0.4878	0.028	-0.7191	0.0281	-0.2943	0.0255	-0.6197
	LEU-81	-2.5461	0.0238	-2.5518	0.0217	-2.3924	0.0246	-2.567	0.0252	-2.7232	0.0241	-2.5561			1.8049	0.0252	1.6964	0.021	1.4945	0.0251	1.9257	0.0265	1.8698	0.0241	1.75826			-0.0136	0.0097	-0.0005	0.0116	-0.0127	0.0093	-0.0174	0.0096	0.0162	0.011	-0.0056			-0.7537	0.0205	-0.8552	0.0187	-0.912	0.0206	-0.6584	0.0229	-0.8376
	ALA-82	-1.0961	0.0453	-2.4166	0.0628	-1.3755	0.0587	-1.4984	0.0631	-1.699	0.0504	-1.61712			1.0472	0.0385	2.0147	0.0527	1.0906	0.0413	1.5207	0.0449	1.4748	0.038	1.4296			-0.0012	0.0086	-0.0075	0.0079	-0.0228	0.0067	0.0007	0.0064	-0.0056	0.0069	-0.00728			-0.0497	0.0272	-0.4068	0.0335	-0.3069	0.0332	0.021	0.0349	-0.2308
	PHE-83	-11.0213	0.2413	-13.656	0.2042	-13.7179	0.164	-14.0961	0.1667	-12.4366	0.1908	-12.9856			9.8042	0.2311	11.961	0.1857	11.6211	0.1676	13.3833	0.1522	11.1115	0.1951	11.5762			-0.3109	0.0132	-0.4185	0.0176	-0.4111	0.0127	-0.4991	0.0122	-0.3434	0.0147	-0.3966			-1.5207	0.1347	-2.0999	0.144	-2.5046	0.1746	-1.21	0.1533	-1.6635
	ILE-84	-9.3114	0.1475	-8.8787	0.1009	-9.9358	0.0976	-10.317	0.0919	-9.3055	0.1077	-9.54968			5.6996	0.1716	5.2081	0.0977	5.9323	0.0918	6.7918	0.0964	6.1014	0.1104	5.94664			-0.2354	0.0125	-0.0428	0.01	-0.1247	0.0091	-0.1421	0.0098	-0.0915	0.0105	-0.1273			-3.8469	0.0901	-3.7149	0.0785	-4.1307	0.0927	-3.666	0.083	-3.2913
	ASP-85	31.1653	0.4884	31.1059	0.4002	32.2679	0.4065	35.2951	0.3493	22.1871	0.4025	30.4043			13.3661	0.3652	15.8122	0.3304	11.2604	0.3527	14.3037	0.3065	18.1006	0.312	14.5686			-0.1559	0.0092	-0.1632	0.0075	-0.075	0.0073	-0.1005	0.0071	-0.1143	0.0077	-0.12178			44.388	0.3092	46.7627	0.2621	43.4817	0.2957	49.5015	0.2781	40.1807
	GLY-86	-8.9965	0.1412	-11.6878	0.1397	-9.5349	0.1465	-9.6073	0.1452	-10.0349	0.1289	-9.97228			5.0558	0.1406	7.3422	0.1369	5.497	0.134	6.523	0.1242	5.9397	0.1304	6.07154			-0.3422	0.0107	-0.3317	0.01	-0.3467	0.0111	-0.3976	0.0106	-0.3054	0.0081	-0.34472			-4.2872	0.0842	-4.6808	0.1005	-4.3912	0.1014	-3.4892	0.0921	-4.3953
	ALA-87	-12.5149	0.1804	-10.7617	0.1114	-11.809	0.1971	-11.3727	0.1388	-13.057	0.1342	-11.9031			3.9006	0.1841	0.8864	0.1176	3.2625	0.1737	3.1698	0.1429	3.3051	0.1486	2.90488			-1.8166	0.0194	-1.6089	0.0174	-1.546	0.0203	-1.4622	0.0221	-1.6228	0.0142	-1.6113			-10.417	0.1222	-11.4898	0.1374	-10.1029	0.143	-9.6662	0.1428	-11.3662
	GLY-88	-2.8806	0.085	-3.25	0.0851	-2.629	0.0845	-3.5286	0.0856	-2.3561	0.0772	-2.92886			0.4979	0.091	-0.0562	0.0842	-0.2335	0.1116	-0.001	0.096	-0.41	0.0809	-0.04056			-0.4568	0.014	-0.3524	0.009	-0.3985	0.0119	-0.3586	0.01	-0.3811	0.0131	-0.38948			-2.8358	0.1058	-3.662	0.0936	-3.2643	0.0945	-3.8843	0.1047	-3.1435
	LEU-89	-5.2557	0.2293	-6.9479	0.1762	-0.6619	0.171	-2.0523	0.1945	-5.1846	0.2084	-4.02048			3.3606	0.2353	3.6651	0.1858	-2.7249	0.3243	-3.8391	0.2848	2.9011	0.1919	0.67256			-0.4182	0.0257	-0.606	0.0188	-0.3956	0.0183	-0.5474	0.0136	-0.6613	0.0218	-0.5257			-2.3142	0.1316	-3.8892	0.1364	-3.7754	0.218	-6.4412	0.2029	-2.9516
	VAL-90	-5.4725	0.1278	-5.3711	0.1811	-1.8792	0.0621	-1.5017	0.1117	-5.6566	0.1242	-3.97622			1.9867	0.0925	1.3224	0.1257	0.7902	0.0526	0.4411	0.0959	2.0081	0.0976	1.3097			-0.469	0.016	-0.3823	0.0183	-0.0068	0.0063	-0.0093	0.0059	-0.5091	0.017	-0.2753			-3.9546	0.0807	-4.4283	0.1089	-1.095	0.0365	-1.0714	0.0367	-4.1555
	ASP-91	41.3508	0.3775	42.3987	0.2365	46.6337	0.8005	49.0902	0.6665	39.8186	0.3894	43.8584			-3.285	0.1476	-2.9656	0.1175	-9.5257	0.8527	-8.3706	0.6334	-4.4319	0.1763	-5.71576			-0.0319	0.0076	-0.0013	0.0044	-0.1294	0.0134	-0.0942	0.0128	-0.038	0.0059	-0.05896			38.0375	0.2963	39.4314	0.1974	36.978	0.4829	40.632	0.3307	35.3543
	THR-92	-0.8003	0.0459	-1.1172	0.0284	-0.4719	0.0458	-0.8437	0.0793	-0.2848	0.0367	-0.70358			0.2081	0.0589	0.4375	0.054	-0.3229	0.0557	-0.2499	0.0667	0.0793	0.0487	0.03042			0.0043	0.0051	-0.001	0.0079	0.0054	0.0049	0.0046	0.0054	-0.014	0.0065	-0.00014			-0.5914	0.0494	-0.6799	0.0528	-0.793	0.0555	-1.0908	0.0681	-0.2205
	THR-93	-1.3833	0.0464	-1.3986	0.0243	-1.004	0.094	-1.3937	0.0626	-0.7198	0.0397	-1.17988			0.5946	0.0492	0.5366	0.034	0.5273	0.1028	0.6071	0.0673	0.419	0.0416	0.53692			0.005	0.0042	0.0021	0.0049	-0.0026	0.0036	0.0001	0.003	-0.0118	0.0057	-0.00144			-0.7827	0.0394	-0.8586	0.0378	-0.4767	0.0521	-0.7856	0.0501	-0.3112
	TYR-94	-0.4553	0.0558	-0.2957	0.0302	-1.0715	0.0604	-0.6107	0.0378	-1.9859	0.1407	-0.88382			-0.156	0.0728	0.1364	0.0625	0.0941	0.0608	-0.2301	0.0372	1.279	0.1486	0.22468			-0.0037	0.0078	-0.0083	0.005	-0.0074	0.0098	0.0018	0.0086	-0.0622	0.0114	-0.01596			-0.6172	0.0558	-0.1648	0.0722	-0.9828	0.0463	-0.84	0.0327	-0.7765
	ALA-95	0.0859	0.0132	0.0851	0.0093	-0.1181	0.0183	-0.005	0.0196	-0.9472	0.0239	-0.17986			-0.1447	0.0207	-0.0468	0.0165	-0.0559	0.0257	-0.1243	0.0238	0.5653	0.0269	0.03872			-0.0018	0.0036	-0.0011	0.0023	0.0043	0.0042	-0.0013	0.0056	0.0017	0.0062	0.00036			-0.0612	0.0221	0.0368	0.0187	-0.1707	0.0266	-0.1309	0.0278	-0.3795
	GLU-96	30.5877	0.2299	30.6309	0.1159	31.7623	0.1978	32.3559	0.1105	31.8588	0.174	31.4391			-1.0652	0.092	-0.1224	0.1008	-1.6196	0.0895	-1.2848	0.089	-0.9753	0.1053	-1.01346			-0.0046	0.0091	0.0051	0.0061	0.0101	0.0067	0.0042	0.0049	-0.0207	0.01	-0.00118			29.5187	0.2327	30.5159	0.1542	30.1741	0.1988	31.0776	0.1252	30.8688
	SER-97	-1.0306	0.0252	-0.0272	0.0275	-0.4862	0.0192	-0.593	0.015	-0.9194	0.0309	-0.61128			0.4504	0.0322	-0.0152	0.0276	0.0943	0.0338	-0.0186	0.0363	0.5531	0.047	0.2128			-0.0007	0.0106	0.0086	0.0077	0.0012	0.0051	-0.0009	0.0039	0.0033	0.0066	0.0023			-0.5811	0.0282	-0.033	0.0295	-0.3915	0.0311	-0.6117	0.037	-0.3652
	ASP-98	33.4507	0.3242	31.3427	0.218	35.9642	0.3955	37.0282	0.1919	33.2341	0.2792	34.204			-3.6962	0.1847	-1.4042	0.1122	-4.4976	0.1954	-3.4598	0.1406	-3.825	0.1571	-3.37656			-0.0228	0.0097	-0.0075	0.0091	-0.0228	0.0074	-0.0074	0.0065	0.0104	0.0055	-0.01002			29.7352	0.2493	29.9328	0.2306	31.4338	0.322	33.5642	0.1849	29.4192
	LYS-99	-33.7686	0.176	-32.7159	0.1327	-32.6112	0.1968	-34.063	0.1151	-31.5633	0.1864	-32.9444			1.7445	0.0859	0.7997	0.0582	0.9344	0.0924	0.8156	0.0874	1.6017	0.1062	1.17918			-0.0228	0.0143	0.0017	0.0094	0.0065	0.0065	0.0008	0.0065	-0.0088	0.0076	-0.00452			-32.0504	0.1556	-31.9173	0.1255	-31.6704	0.2039	-33.2371	0.1287	-29.97
	TRP-100	0.3267	0.0094	0.2201	0.0075	0.3142	0.0128	0.3896	0.0087	0.3271	0.0106	0.31554			-0.1433	0.0115	-0.0693	0.0103	-0.141	0.0184	-0.1139	0.0182	-0.1339	0.0203	-0.12028			-0.0019	0.0045	-0.0022	0.0061	0.0068	0.0058	-0.0094	0.0049	0.0017	0.0086	-0.001			0.1815	0.0108	0.1491	0.0133	0.1804	0.0202	0.2651	0.0197	0.1942
	VAL-101	0.0397	0.0059	0.1171	0.0066	0.1244	0.0083	0.1289	0.0064	0.1541	0.0052	0.11284			-0.0264	0.0052	-0.0337	0.0056	0.0035	0.0054	-0.0081	0.0041	0.0008	0.0038	-0.01278			-0.0145	0.0048	0.0193	0.008	0.0118	0.0064	-0.0033	0.0033	-0.0007	0.0037	0.00252			-0.0011	0.0069	0.1028	0.0111	0.1402	0.0099	0.1173	0.0078	0.1541
	LEU-102	-0.8944	0.016	-0.705	0.0164	-0.6651	0.0151	-0.6531	0.0121	-0.6813	0.0111	-0.71978			0.0493	0.0251	0.1158	0.0252	-0.1096	0.0247	-0.1031	0.0241	0.1501	0.0294	0.0205			-0.0104	0.0055	-0.0028	0.0049	-0.0013	0.0061	0.0081	0.0056	-0.0066	0.0087	-0.0026			-0.8552	0.0293	-0.5933	0.0279	-0.7769	0.0297	-0.7479	0.0261	-0.5388
	LEU-103	-0.4172	0.0142	-0.5866	0.0175	-0.5641	0.0166	-0.3523	0.0149	-0.1548	0.009	-0.415			-0.0946	0.0091	-0.0354	0.0097	-0.0483	0.0091	-0.04	0.0069	-0.0208	0.0043	-0.04782			0.0078	0.0061	0.0258	0.0084	0.02	0.0073	0.0048	0.0073	0.0017	0.0093	0.01202			-0.5042	0.0188	-0.5976	0.0206	-0.5913	0.0213	-0.387	0.0186	-0.1741
	SER-104	0.3862	0.0621	0.3152	0.0722	0.4843	0.0586	0.9432	0.0483	0.2607	0.015	0.47792			-0.2674	0.0391	-0.0666	0.0416	-0.3081	0.035	-0.3327	0.0372	-0.0076	0.0085	-0.19648			-0.0005	0.0018	0.0006	0.0024	-0.0101	0.0029	-0.0008	0.0012	0.0014	0.0031	-0.00188			0.1234	0.0761	0.2494	0.0767	0.1685	0.0663	0.6088	0.0606	0.2548
	PRO-105	0.0108	0.0163	0.3619	0.0143	0.3954	0.0108	0.1702	0.0128	0.5568	0.009	0.29902			-0.0672	0.0194	0.0021	0.023	-0.1166	0.0201	-0.1439	0.0203	0.0314	0.0188	-0.05884			0.0213	0.0102	-0.0003	0.0091	0.0044	0.012	-0.009	0.0116	0.0049	0.006	0.00426			-0.0348	0.0251	0.3636	0.0293	0.284	0.0248	0.0171	0.0287	0.5922
	GLU-106	30.131	0.2304	36.531	0.2394	37.6964	0.1904	35.5278	0.1844	32.1238	0.1797	34.402			-0.3487	0.119	0.0988	0.132	-0.252	0.0688	-0.7154	0.0934	0.0519	0.1052	-0.23308			0.0017	0.0061	0.0038	0.006	-0.0008	0.0043	-0.0059	0.0055	0.0167	0.0116	0.0031			29.7682	0.2518	36.6316	0.2759	37.4473	0.1984	34.7951	0.2144	32.1821
	PHE-107	1.0617	0.0127	1.1742	0.0181	0.9895	0.0126	1.2576	0.0123	0.9304	0.008	1.08268			-0.0783	0.0162	-0.0565	0.0187	-0.0265	0.0074	-0.1044	0.0176	-0.027	0.0079	-0.05854			-0.0009	0.004	-0.0192	0.006	-0.0032	0.0048	0.0045	0.0048	0.003	0.0046	-0.00316			0.9818	0.021	1.0988	0.0267	0.96	0.0148	1.1564	0.0236	0.9067
	ARG-108	-30.8961	0.121	-32.7598	0.1322	-32.8995	0.1908	-35.0982	0.1435	-29.8768	0.1251	-32.3061			-0.1089	0.0336	0.0578	0.0535	-0.273	0.0455	-0.176	0.0386	-0.1088	0.0459	-0.12178			0.0063	0.005	0.0237	0.0081	0.0028	0.0074	0.0021	0.0072	-0.0069	0.011	0.0056			-31.0035	0.1272	-32.678	0.1383	-33.17	0.2012	-35.2731	0.1428	-29.9968
	ALA-109	0.6018	0.0197	0.7504	0.0253	0.9272	0.0162	1.0525	0.0154	0.8284	0.008	0.83206			-0.064	0.0171	-0.0031	0.0193	-0.0899	0.0143	-0.1196	0.0196	0.0122	0.0184	-0.05288			0.0057	0.0056	-0.0036	0.0049	-0.0009	0.0044	-0.0002	0.0029	-0.0037	0.0051	-0.00054			0.5422	0.0272	0.7421	0.0319	0.8352	0.0238	0.9319	0.0258	0.836
	ILE-110	0.9936	0.0199	1.2486	0.0211	1.3451	0.0136	1.5732	0.0169	1.1206	0.0095	1.25622			-0.0627	0.0095	-0.074	0.0124	-0.1224	0.0112	-0.0652	0.0098	-0.033	0.0046	-0.07146			-0.0156	0.0065	0.0014	0.0076	-0.0015	0.0052	-0.0004	0.0056	-0.0025	0.0094	-0.00372			0.9161	0.0227	1.1751	0.0264	1.2225	0.0178	1.5068	0.0196	1.0847
	TRP-111	0.5689	0.0153	1.0931	0.0249	1.3266	0.0228	0.9683	0.0258	1.2552	0.0154	1.04242			-0.105	0.0235	-0.062	0.0164	-0.1268	0.0181	-0.1906	0.0185	-0.0086	0.0162	-0.0986			0.0132	0.0094	-0.0248	0.0097	0.0046	0.0102	0.0055	0.0036	0.0097	0.0114	0.00164			0.477	0.0285	1.0057	0.0317	1.2059	0.0298	0.7836	0.032	1.2558
	GLN-112	0.1054	0.0426	0.2357	0.0556	0.4376	0.0522	0.2349	0.0711	0.5107	0.0322	0.30486			-0.4176	0.064	0.0486	0.082	-0.6165	0.0586	-0.7704	0.0558	0.1852	0.0668	-0.31414			0.0095	0.0062	-0.0015	0.0028	0.0045	0.0027	0.0025	0.0017	0.0023	0.0032	0.00346			-0.3054	0.0788	0.2838	0.1002	-0.1782	0.0792	-0.532	0.0958	0.6969
	ASP-113	51.4925	0.3412	60.0231	0.3786	60.761	0.3918	66.4254	0.3539	49.0185	0.2831	57.5441			-1.2209	0.0993	-0.8708	0.1182	-1.397	0.0897	-1.3522	0.0961	-0.315	0.1141	-1.03118			0.0011	0.0051	0.0013	0.0035	0.0017	0.0047	-0.0005	0.0035	-0.0037	0.0038	-2e-05			50.2807	0.3327	59.1539	0.3876	59.3597	0.3702	65.0914	0.3592	48.714
	ARG-114	-44.0237	0.2523	-49.6873	0.3211	-53.0025	0.4862	-55.6964	0.4013	-45.2513	0.3267	-49.5322			-0.2712	0.0553	0.2473	0.061	-0.0722	0.0651	-0.2804	0.0558	0.1455	0.0581	-0.0462			0.003	0.0054	-0.0071	0.0053	0.0033	0.0046	0.0003	0.0036	0.017	0.0066	0.0033			-44.292	0.2547	-49.4233	0.3117	-53.0524	0.4697	-55.9754	0.392	-45.0915
	LYS-115	-63.9258	0.8428	-75.9315	0.9958	-82.029	1.1373	-84.5808	0.9252	-61.9941	0.7269	-73.6922			0.5742	0.3312	1.3592	0.351	2.4174	0.1912	2.0107	0.3007	-0.1897	0.2259	1.23436			-0.0066	0.0052	-0.0186	0.0062	0.0093	0.0049	0.0047	0.007	-0.0057	0.005	-0.00338			-63.3461	0.6533	-74.572	0.8458	-79.5963	1.05	-82.5335	0.7452	-62.1622
	ARG-116	-55.1376	0.5294	-63.1509	0.6574	-58.9466	0.5274	-68.1538	0.5646	-44.8948	0.3704	-58.0567			-0.1565	0.068	1.541	0.2406	-0.4332	0.0486	-0.0077	0.0809	0.1266	0.0504	0.21404			-0.0016	0.0072	-0.0083	0.0102	-0.0144	0.0075	0.0011	0.0066	-0.0204	0.0091	-0.00872			-55.3107	0.5397	-61.6501	0.5199	-59.3938	0.5376	-68.1422	0.5414	-44.7748
	CYS-117	-0.1713	0.0305	-0.4331	0.0382	-0.7704	0.0328	-1.3958	0.0259	-0.2397	0.0314	-0.60206			-0.0782	0.0119	-0.0955	0.0116	-0.0314	0.0091	0.0868	0.0074	-0.0131	0.0129	-0.02628			0.0034	0.0032	0.0081	0.0052	0	0.0056	-0.0011	0.0043	0.0164	0.0076	0.00536			-0.2458	0.0285	-0.5215	0.0352	-0.802	0.0303	-1.3104	0.0248	-0.2379
	GLU-118	55.9741	0.3222	62.2623	0.4043	63.7781	0.3791	60.6704	0.4102	51.6586	0.3477	58.8687			-2.753	0.1377	-3.7048	0.1869	-4.0291	0.1216	-2.61	0.126	-1.0299	0.1223	-2.82536			-0.0268	0.0083	0.0113	0.0084	0.0162	0.0084	0.0203	0.0073	0.0006	0.0075	0.00432			53.1906	0.2617	58.5649	0.3166	59.7523	0.3079	58.0708	0.3428	50.63
	TYR-119	-0.1986	0.1892	-1.0608	0.3374	0.7949	0.1875	-0.5918	0.1724	0.5659	0.1216	-0.09808			-0.0707	0.1472	0.2946	0.2871	-1.6384	0.1717	-1.0831	0.1794	-0.8673	0.1119	-0.67298			0.0088	0.0106	-0.1475	0.0161	-0.0382	0.0081	0.0006	0.0099	-0.0051	0.0089	-0.03628			-0.2644	0.1084	-0.9245	0.1263	-0.884	0.0865	-1.6847	0.0923	-0.3125
	TRP-120	-0.1925	0.0273	-0.2952	0.0356	-0.6106	0.0303	-0.5644	0.0262	-1.0457	0.0879	-0.54168			0.0421	0.031	0.0113	0.0335	-0.0037	0.0279	0.0693	0.0286	0.1096	0.0345	0.04572			-0.008	0.0049	0.0007	0.006	-0.007	0.0045	0.0044	0.0031	0.0039	0.0047	-0.0012			-0.1581	0.0337	-0.2838	0.0404	-0.6214	0.0368	-0.4908	0.0317	-0.9329
	PHE-121	-1.8375	0.0223	-1.8823	0.0281	-1.9826	0.0211	-2.0925	0.0232	-1.764	0.0236	-1.91178			0.6841	0.0117	0.5862	0.0116	0.5883	0.0098	0.6772	0.0099	0.4429	0.0123	0.59574			-0.0181	0.0097	0.02	0.0089	-0.0066	0.0084	0.0037	0.0058	0.0237	0.0085	0.00454			-1.1702	0.019	-1.2754	0.0245	-1.4005	0.0174	-1.4118	0.017	-1.2974
	LEU-122	-2.6236	0.0392	-2.5604	0.0512	-2.6664	0.0338	-2.6286	0.0361	-2.1335	0.03	-2.5225			1.1923	0.0236	1.0225	0.0262	1.1447	0.0176	1.2253	0.0189	0.7915	0.0184	1.07526			-0.0572	0.0157	0	0.0134	-0.0494	0.0122	-0.0323	0.0131	-0.0251	0.0117	-0.0328			-1.4893	0.0286	-1.5364	0.0345	-1.5715	0.0275	-1.4348	0.0261	-1.3681
	GLN-123	-0.7555	0.2712	-0.4354	0.294	-0.1747	0.1987	0.5992	0.2023	0.9197	0.1907	0.03066			0.155	0.1288	0.4646	0.129	-0.1678	0.0923	0.1235	0.0855	0.3781	0.0942	0.19068			-0.0108	0.0114	0.0414	0.0123	-0.0201	0.0099	0.005	0.0094	-0.0056	0.0096	0.00198			-0.6157	0.1982	0.0691	0.2195	-0.3538	0.1502	0.7195	0.1554	1.2919
	GLN-124	-6.69	0.0463	-6.7265	0.0449	-6.1116	0.0431	-6.1822	0.0518	-5.8773	0.0451	-6.31752			2.0935	0.0345	1.9515	0.042	1.4386	0.0393	1.47	0.0438	1.5067	0.0357	1.69206			0.0182	0.0069	0.0084	0.0095	0.0231	0.0088	-0.021	0.0085	-0.0065	0.0088	0.00444			-4.5775	0.0404	-4.7663	0.0438	-4.6492	0.0404	-4.7313	0.0435	-4.3784
	ILE-125	-3.0433	0.042	-3.1716	0.0454	-3.3037	0.0319	-3.3273	0.0385	-3.347	0.0291	-3.23858			1.6126	0.0208	1.4087	0.02	1.3308	0.0181	1.4926	0.021	1.3732	0.0199	1.44358			-0.005	0.0098	0.0103	0.0099	0.0382	0.0145	-0.0051	0.0099	-0.0226	0.0127	0.00316			-1.4358	0.0332	-1.751	0.0359	-1.9349	0.0313	-1.8393	0.0269	-1.996
	ILE-126	-4.5613	0.0709	-3.6254	0.0593	-3.6543	0.0609	-3.4814	0.0493	-2.4695	0.0563	-3.55838			2.5809	0.0792	2.0125	0.0437	1.9449	0.0389	2.1547	0.0348	1.1873	0.0397	1.97606			-0.0035	0.0132	0.0164	0.0104	-0.0143	0.0138	-0.0171	0.0137	-0.0148	0.0171	-0.00666			-1.9869	0.0526	-1.5976	0.0383	-1.7257	0.0436	-1.3446	0.0335	-1.2978
	THR-127	-0.8766	0.1142	-0.7737	0.1175	-0.2477	0.112	0.3836	0.1126	0.1172	0.113	-0.27944			0.067	0.0692	-0.1796	0.0667	-0.1703	0.0746	-0.9385	0.078	-0.0785	0.0802	-0.25998			-0.1562	0.0103	-0.1027	0.0126	-0.1332	0.0101	-0.1093	0.0119	-0.0781	0.0131	-0.1159			-0.9633	0.0849	-1.0554	0.0887	-0.554	0.0764	-0.6638	0.0754	-0.0411
	PRO-128	-15.2751	0.1328	-15.442	0.1391	-15.8275	0.1266	-15.7002	0.1319	-15.6024	0.1465	-15.5694			8.5907	0.1059	8.898	0.0972	8.7534	0.0985	8.478	0.1137	9.2942	0.1176	8.80286			-1.4005	0.0206	-1.4078	0.0218	-1.3751	0.0224	-1.3944	0.0213	-1.2433	0.0265	-1.36422			-8.084	0.1333	-7.9503	0.1365	-8.4475	0.1118	-8.6207	0.1269	-7.5465
	SER-129	-1.8814	0.1031	-2.0905	0.1023	-2.0176	0.1111	-1.7411	0.1114	-1.5418	0.0668	-1.85448			2.0677	0.0845	2.6199	0.0866	1.6935	0.0914	1.1025	0.0786	2.4807	0.0987	1.99286			-0.1461	0.0095	-0.1579	0.0088	-0.0907	0.0086	-0.0841	0.0078	-0.1175	0.0089	-0.11926			0.0396	0.1096	0.3709	0.1089	-0.413	0.0997	-0.721	0.0887	0.8175
	PRO-130	-6.3469	0.1049	-5.4639	0.0938	-6.253	0.1368	-6.065	0.1017	-5.4952	0.1168	-5.9248			0.4318	0.0559	0.5446	0.0235	0.4517	0.1028	-0.0388	0.0737	0.6373	0.0552	0.40532			-1.0092	0.0169	-0.9044	0.0156	-1.0453	0.0168	-1.0268	0.017	-0.9925	0.0176	-0.99564			-6.9185	0.0922	-5.826	0.0921	-6.8407	0.1217	-7.1263	0.0926	-5.8506
	ALA-131	1.4677	0.0445	1.3149	0.0273	1.2201	0.0533	1.471	0.0385	1.6521	0.0326	1.42516			-0.2746	0.0331	-0.0553	0.0242	-0.3818	0.0471	-0.6676	0.0332	-0.2161	0.0305	-0.31908			-0.0181	0.008	0.0085	0.0092	-0.0304	0.0085	-0.0106	0.0093	0.0065	0.0063	-0.00882			1.1759	0.0291	1.2669	0.0273	0.8087	0.0314	0.7945	0.0292	1.4404
	PHE-132	0.7983	0.0413	0.7051	0.0267	0.7627	0.0287	0.9315	0.0275	1.1166	0.0279	0.86284			-0.0681	0.03	0.1931	0.0263	0.0006	0.029	-0.2248	0.0287	-0.1463	0.0295	-0.0491			0.0059	0.0094	-0.0041	0.0119	0.0203	0.0104	-0.0193	0.0086	0.0176	0.0078	0.00408			0.7356	0.0292	0.8929	0.0267	0.7847	0.023	0.6875	0.0239	0.9871
	ASN-133	-2.7384	0.0827	-2.3935	0.0779	-3.8892	0.0929	-4.1786	0.0938	-2.6305	0.0881	-3.16604			1.3334	0.1663	0.7708	0.1328	1.7709	0.1489	1.5805	0.1378	1.8406	0.1571	1.45924			-0.1968	0.0095	-0.1807	0.0071	-0.2329	0.0092	-0.2902	0.0107	-0.2738	0.0092	-0.23488			-1.6015	0.1398	-1.8132	0.1023	-2.3495	0.1161	-2.881	0.1086	-1.0579
	LYS-134	-56.4591	1.077	-42.2406	0.3673	-95.8659	1.7526	-93.9822	1.1022	-47.6344	0.6742	-67.2364			24.3779	1.6905	6.2303	0.2119	103.021	2.918	93.0507	1.9959	17.4273	1.002	48.8215			-0.1242	0.0198	-0.0051	0.0103	-0.8105	0.0238	-0.8081	0.0178	-0.0302	0.0126	-0.35562			-32.1665	0.749	-36.0142	0.3073	6.2945	1.3647	-1.7355	1.0463	-30.277
	VAL-135	0.3575	0.0205	0.3961	0.0116	0.0701	0.0173	0.1376	0.0147	0.3435	0.015	0.26096			0.0423	0.0151	-0.0089	0.0098	0.3112	0.0175	0.1082	0.0171	0.0296	0.0141	0.09648			-0.0024	0.0075	0.0116	0.0062	-0.0004	0.0066	0.0007	0.0048	-0.0043	0.008	0.00104			0.3977	0.0156	0.3989	0.0124	0.3804	0.0139	0.2467	0.0152	0.369
	LEU-136	0.245	0.0166	0.3174	0.0114	0.1645	0.0168	0.1445	0.015	0.1743	0.0176	0.20914			0.0231	0.0176	-0.0702	0.0131	0.0964	0.0171	0.0129	0.0188	0.1091	0.0204	0.03426			-0.0081	0.0067	-0.0019	0.0104	-0.0101	0.0094	-0.0202	0.0097	0.0184	0.0121	-0.00438			0.2606	0.0155	0.2463	0.0167	0.2508	0.0164	0.1383	0.0158	0.3014
	ALA-137	-0.0138	0.0171	0.0986	0.0118	-0.087	0.0197	-0.1383	0.0188	-0.1809	0.0165	-0.06428			0.2809	0.0247	0.1792	0.0165	0.4492	0.0209	0.3713	0.0228	0.5226	0.0225	0.36064			0.0018	0.0035	0.0106	0.0065	-0.008	0.0056	0.0038	0.0057	-0.0095	0.0053	-0.00026			0.2678	0.019	0.289	0.0199	0.3552	0.0152	0.238	0.0144	0.3323
	LEU-138	-0.1154	0.0135	-0.0069	0.0118	-0.3021	0.0167	-0.3302	0.013	-0.0978	0.0119	-0.17048			0.1394	0.0252	0.1248	0.0194	0.3465	0.0231	0.1937	0.022	0.2671	0.0188	0.2143			0.0066	0.0097	-0.0066	0.0077	0.011	0.0079	-0.0033	0.0054	-0.0068	0.0088	0.00018			0.0319	0.0253	0.1103	0.0239	0.0548	0.0232	-0.1393	0.0196	0.1625
	LEU-139	0.0542	0.0113	0.0425	0.0088	-0.1352	0.0115	-0.1081	0.01	0.1387	0.0109	-0.00158			0.0344	0.011	-0.0236	0.0082	0.0788	0.0208	0.0101	0.0161	0.0885	0.0123	0.03764			-0.0381	0.012	-0.0205	0.0096	-0.0003	0.0076	-0.0021	0.0049	0.0319	0.0142	-0.00582			0.0508	0.015	-0.0021	0.0147	-0.0566	0.0198	-0.1005	0.0164	0.2589
	ARG-140	-41.1273	0.2907	-41.038	0.1837	-38.7572	0.2577	-41.2777	0.2073	-36.527	0.3025	-39.7454			2.3734	0.2167	0.8139	0.1136	1.6258	0.1724	2.0518	0.1568	1.369	0.2101	1.64678			0.0381	0.0109	-0.0123	0.0134	0.024	0.0082	-0.001	0.0077	-0.0127	0.0072	0.00722			-38.6992	0.1657	-40.2317	0.1521	-37.1059	0.1945	-39.2286	0.1377	-35.1628
	LYS-141	-36.628	0.1671	-36.7195	0.1425	-36.1036	0.1658	-37.1694	0.1261	-33.3807	0.194	-36.0002			0.0156	0.1278	0.4247	0.1294	-0.0797	0.1009	-0.3773	0.1045	0.6787	0.136	0.1324			-0.0127	0.0076	0.0199	0.0099	-0.0027	0.0063	-0.003	0.0043	0.013	0.0083	0.0029			-36.621	0.1645	-36.2721	0.1624	-36.1847	0.1802	-37.5481	0.149	-32.687
	SER-142	0.0371	0.0057	0.0779	0.0087	0.023	0.0062	0.0476	0.0084	0.0415	0.0084	0.04542			-0.01	0.0259	-0.0181	0.0323	-0.1517	0.0299	-0.1079	0.0273	0.049	0.0322	-0.04774			0.0057	0.005	-0.0124	0.0044	0.0015	0.005	-0.0002	0.0042	-0.0028	0.0056	-0.00164			0.0317	0.027	0.0461	0.0339	-0.1256	0.0312	-0.0604	0.0294	0.0863
	GLU-143	36.5685	0.1195	36.8521	0.091	37.0682	0.127	38.4611	0.0921	34.926	0.1337	36.7752			-0.489	0.1098	0.0781	0.1312	-0.2612	0.0882	-0.2465	0.0909	0.2364	0.1099	-0.13644			0	0.0055	-0.0071	0.0065	-0.0032	0.0059	-0.009	0.0054	0.0027	0.008	-0.00332			36.0746	0.1514	36.9228	0.153	36.8092	0.1433	38.2054	0.125	35.1668
	SER-144	0.8508	0.0067	0.9636	0.0085	0.9475	0.0098	0.9804	0.0087	0.8261	0.0077	0.91368			-0.0479	0.0229	0.0135	0.0254	-0.0823	0.029	-0.0335	0.025	0.0485	0.0245	-0.02034			-0.006	0.004	-0.0004	0.0047	0.0016	0.0059	0.0077	0.0047	-0.0086	0.0053	-0.00114			0.7978	0.0228	0.9762	0.0265	0.8683	0.0303	0.9538	0.0263	0.8656
	TYR-145	0.9861	0.0094	1.0712	0.0115	0.8916	0.0154	1.0901	0.0119	0.7513	0.0128	0.95806			0.099	0.0172	0.0113	0.019	0.2028	0.0168	0.1101	0.015	0.1858	0.0182	0.1218			0.0013	0.0092	-0.0183	0.01	0.0123	0.0069	0.003	0.0059	0.0232	0.0111	0.0043			1.0861	0.0195	1.0639	0.022	1.1068	0.0214	1.2036	0.0189	0.9586
	TRP-146	0.8708	0.0116	0.6403	0.0137	0.6762	0.0163	0.8245	0.0155	0.4686	0.014	0.69608			-0.0204	0.0107	0.0268	0.015	0.0622	0.0173	0.0111	0.0203	0.2106	0.0157	0.05806			-0.0104	0.007	0.0266	0.0099	-0.0355	0.012	-0.0023	0.0081	-0.0054	0.0086	-0.0054			0.8392	0.014	0.6938	0.0196	0.7017	0.0245	0.8342	0.0248	0.6744
	LEU-147	0.922	0.0061	0.8561	0.0063	1.0289	0.0063	0.9769	0.006	0.8603	0.0068	0.92884			-0.0652	0.0032	-0.0844	0.0033	-0.0435	0.0038	-0.0514	0.0027	-0.0359	0.0031	-0.05608			-0.0024	0.0111	-0.0228	0.0126	-0.0098	0.0134	0.0132	0.0087	0.0155	0.0112	-0.00126			0.8546	0.0125	0.7489	0.0132	0.9753	0.0151	0.9386	0.0104	0.8402
	VAL-148	1.1113	0.0081	1.1455	0.0076	1.2371	0.0111	1.2521	0.0091	1.1214	0.0099	1.17348			-0.0287	0.0067	-0.1338	0.0062	0.009	0.0066	-0.0197	0.007	-0.0598	0.0062	-0.0466			-0.0195	0.0104	-0.0198	0.0106	-0.008	0.0077	0.0218	0.0085	0.0046	0.0083	-0.00418			1.0627	0.0126	0.9913	0.0132	1.2381	0.0112	1.2541	0.0128	1.0657
	GLY-149	1.3459	0.0124	1.2097	0.0127	1.4932	0.0154	1.3486	0.0164	1.2423	0.0136	1.32794			0.0195	0.0079	-0.0242	0.0082	0.0878	0.0096	0.0544	0.0093	0.0608	0.0071	0.03966			-0.0219	0.005	-0.0088	0.007	-0.008	0.0039	0.0229	0.0065	0.0199	0.0061	0.00082			1.3437	0.0122	1.1773	0.0132	1.5725	0.0144	1.4266	0.0178	1.3227
	TYR-150	1.5069	0.0281	0.7627	0.0152	1.6233	0.0302	1.5541	0.0267	1.2893	0.0254	1.34726			-0.2689	0.0301	-0.0678	0.0414	-0.213	0.0238	-0.0816	0.0162	-0.0476	0.0177	-0.13578			0.0011	0.0057	0.0288	0.0073	0.0141	0.0147	0.026	0.009	0.0237	0.0112	0.01874			1.2391	0.0386	0.7218	0.0438	1.4243	0.0403	1.4995	0.0298	1.2652
	LEU-151	1.1865	0.0095	1.2318	0.0089	1.4455	0.0145	1.3086	0.0106	1.3898	0.0084	1.31244			-0.1744	0.0043	-0.2182	0.0043	-0.2253	0.0065	-0.2187	0.0044	-0.3192	0.0072	-0.23116			0.0339	0.0123	-0.0234	0.013	-0.0098	0.0124	-0.0227	0.009	-0.0003	0.0125	-0.00446			1.0457	0.016	0.9905	0.0155	1.21	0.0176	1.0672	0.0154	1.0696
	LEU-152	1.6724	0.0176	1.7011	0.016	1.899	0.0387	1.0981	0.0345	1.9175	0.0142	1.65762			-0.1045	0.0133	-0.1555	0.0127	-0.2782	0.0189	0.0885	0.0206	-0.3442	0.0212	-0.15878			-0.0077	0.0113	0.0295	0.0109	-0.0007	0.0072	0.0154	0.0085	0.0502	0.0155	0.01734			1.5601	0.0213	1.5736	0.021	1.6208	0.034	1.2025	0.0287	1.6243
	ALA-153	2.2287	0.0254	1.8581	0.0202	2.805	0.0316	1.6848	0.0371	2.1251	0.0258	2.14034			-0.1731	0.0153	-0.1144	0.0241	-0.2531	0.0217	-0.0227	0.0103	-0.1452	0.0229	-0.1417			0.0171	0.0054	0.0092	0.0038	-0.0139	0.004	-0.0004	0.0035	-0.0006	0.0066	0.00228			2.0745	0.0247	1.7517	0.0314	2.5376	0.0335	1.662	0.038	1.9798
	GLN-154	0.398	0.0238	-0.4457	0.0275	-1.8801	0.0775	3.0716	0.0346	0.6574	0.0488	0.36024			0.0136	0.0188	-0.0772	0.0255	0.1481	0.055	-0.6485	0.0377	0.0039	0.0296	-0.11202			0.0144	0.0064	0.0033	0.0073	0.0334	0.0119	0.0041	0.0058	0.0113	0.0078	0.0133			0.4259	0.0274	-0.5217	0.0373	-1.6909	0.0813	2.4294	0.05	0.6757
	SER-155	0.1171	0.0369	0.0759	0.0264	-0.7336	0.0383	-0.0802	0.0312	0.059	0.0375	-0.11236			-0.0586	0.0326	0.0303	0.0189	-0.2395	0.03	-0.0668	0.0177	0.0219	0.0304	-0.06254			0.0166	0.0068	0.0149	0.0059	0.0106	0.0089	0.0062	0.0035	-0.0018	0.0053	0.0093			0.0764	0.0484	0.1222	0.0314	-0.9641	0.0537	-0.1406	0.0367	0.0765
	THR-156	1.4746	0.0196	1.8551	0.0194	1.3195	0.0272	1.1313	0.0186	-0.0893	0.018	1.13824			-0.1852	0.0087	-0.4507	0.0124	-0.2064	0.0105	-0.1501	0.0057	0.026	0.0162	-0.19328			0.0346	0.0098	-0.0005	0.0097	-0.0026	0.0112	-0.0093	0.0102	-0.014	0.0063	0.00164			1.3251	0.022	1.4041	0.018	1.1112	0.0236	0.9719	0.0222	-0.0758
	SER-157	0.4579	0.0973	1.3266	0.0651	-1.2322	0.0835	0.6359	0.0733	0.6542	0.0435	0.36848			-0.1843	0.0342	-0.3189	0.0486	-0.1276	0.029	-0.3648	0.0312	-0.4284	0.0464	-0.2848			0.0247	0.0074	0.0102	0.0055	0.0061	0.006	0.0054	0.0039	-0.0069	0.0062	0.0079			0.2935	0.1055	1.0146	0.0786	-1.3498	0.0919	0.2716	0.0856	0.2213
	GLY-158	0.4858	0.041	0.8233	0.0323	-0.5563	0.0226	0.3038	0.0266	-0.046	0.0239	0.20212			-0.1327	0.0271	-0.0111	0.0262	-0.2544	0.0296	-0.0304	0.0199	0.0428	0.0262	-0.07716			0.0077	0.0037	0.0101	0.0045	-0.0052	0.0034	-0.0005	0.0027	0.008	0.0036	0.00402			0.3603	0.0511	0.8205	0.0365	-0.8166	0.0346	0.2729	0.0335	0.005
	ASN-159	0.8662	0.0513	1.3838	0.0444	0.6251	0.0482	1.201	0.0377	1.3973	0.0707	1.09468			-0.3613	0.04	-0.4074	0.0388	-0.2773	0.0298	-0.4178	0.0307	-0.3769	0.036	-0.36814			0.0046	0.0068	0.0273	0.008	0.0008	0.0073	-0.0057	0.0054	-0.0043	0.0079	0.00454			0.5081	0.0649	1.0046	0.0588	0.3503	0.058	0.7777	0.053	1.0111
	THR-160	-1.3061	0.0163	-1.3605	0.0215	-1.1424	0.0197	-0.982	0.0173	-0.8895	0.0182	-1.1361			0.1374	0.0191	0.1319	0.0214	0.1213	0.0239	-0.0099	0.0185	-0.0252	0.0237	0.0711			0.013	0.0056	0.0043	0.0064	0.0122	0.0059	0.0051	0.0029	0.007	0.0049	0.00832			-1.1567	0.0259	-1.2248	0.0282	-1.0086	0.0257	-0.987	0.0253	-0.9092
	MET-161	-2.2132	0.0357	-2.3055	0.048	-2.0168	0.0436	-1.2268	0.0295	-1.4912	0.0611	-1.8507			0.6418	0.0198	0.6319	0.0326	0.4555	0.0296	0.1909	0.0267	0.2283	0.0381	0.42968			-0.0282	0.0118	0.0239	0.0138	-0.0144	0.0105	-0.0106	0.0104	-0.0007	0.0112	-0.006			-1.5992	0.032	-1.65	0.0423	-1.5773	0.034	-1.047	0.0334	-1.2614
	ARG-162	-56.8105	0.2012	-58.3936	0.2425	-57.6065	0.2982	-55.4058	0.2333	-52.3328	0.228	-56.1098			0.3817	0.0571	0.873	0.0765	0.4652	0.0727	-0.1965	0.0551	0.3161	0.0614	0.3679			-0.0105	0.0086	-0.0125	0.0093	-0.02	0.0075	0.0062	0.0068	-0.0225	0.0083	-0.01186			-56.4388	0.1844	-57.5334	0.2221	-57.1671	0.2555	-55.5968	0.2256	-52.0476
	MET-163	-0.9333	0.033	-0.8993	0.0266	-1.0725	0.0422	-0.5701	0.0214	-0.6059	0.0307	-0.81622			0.0744	0.0135	0.1253	0.013	0.0882	0.0129	-0.0264	0.01	0.0815	0.0119	0.0686			0.0082	0.0073	-0.0042	0.0068	0.0113	0.0074	0.0012	0.0069	-0.0101	0.0128	0.00128			-0.8515	0.0326	-0.7779	0.0286	-0.9726	0.0403	-0.5952	0.021	-0.5334
	LEU-164	-1.2636	0.007	-1.3697	0.0102	-1.2714	0.0082	-1.1699	0.0088	-0.5562	0.0109	-1.12616			0.1726	0.0035	0.2119	0.0046	0.1657	0.0035	0.0957	0.0048	0.1093	0.0096	0.15104			0.0183	0.0093	0.0348	0.0094	0.0065	0.0089	0.0062	0.009	0.0187	0.0078	0.0169			-1.0731	0.0108	-1.1232	0.013	-1.0997	0.011	-1.0679	0.0129	-0.4283
	GLY-165	-1.0936	0.0069	-1.1366	0.009	-1.0817	0.0083	-0.9654	0.0075	-0.4884	0.0122	-0.95314			0.1522	0.0091	0.1605	0.0119	0.1258	0.008	0.0143	0.0134	0.0471	0.0068	0.09998			0.0035	0.0044	0.0076	0.004	-0.0023	0.0044	0.0011	0.0033	0.0045	0.005	0.00288			-0.9374	0.0114	-0.9682	0.0134	-0.9585	0.0112	-0.9503	0.0152	-0.4368
	GLU-166	49.3242	0.1474	49.4919	0.1407	49.4665	0.1349	47.9207	0.1344	43.7808	0.1392	47.9968			-0.5285	0.089	-0.3073	0.1057	-0.569	0.0916	-0.6974	0.1052	-0.0801	0.1201	-0.43646			-0.0088	0.0088	-0.0028	0.0119	-0.0046	0.0087	-0.0001	0.0075	-0.0205	0.0094	-0.00736			48.7797	0.18	49.1795	0.1664	48.8932	0.1559	47.2271	0.1717	43.6762
	ASP-167	48.8475	0.1405	48.1336	0.1478	48.5381	0.1104	48.4091	0.1054	45.8978	0.1342	47.9652			-0.5555	0.0986	-0.3311	0.1095	-0.8565	0.0844	-0.8324	0.0819	-0.2068	0.1055	-0.55646			0.008	0.0076	-0.005	0.0066	0.0088	0.0079	0	0.0064	-0.008	0.0112	0.00076			48.3043	0.1778	47.7973	0.1914	47.6921	0.1427	47.5698	0.1274	45.6815
	TYR-168	-0.9669	0.0275	-1.0265	0.0278	-0.9047	0.0241	-0.8103	0.0208	0.1073	0.0152	-0.72022			0.0556	0.0217	0.1149	0.0263	-0.0123	0.0251	0.0786	0.0204	0.0337	0.0061	0.0541			0.0013	0.0092	0.014	0.0099	0.0039	0.0076	-0.0144	0.0079	0.002	0.0119	0.00136			-0.9109	0.0353	-0.8975	0.0384	-0.9123	0.034	-0.7453	0.0273	0.1431
	GLY-169	-0.7918	0.0061	-0.8102	0.0078	-0.7834	0.0081	-0.6764	0.0081	-0.0594	0.0055	-0.62424			-0.0284	0.0205	0.0993	0.0242	-0.0559	0.0177	-0.0771	0.0185	-0.0067	0.005	-0.01376			-0.0024	0.0035	-0.0017	0.0041	-0.0033	0.002	0.0024	0.0028	-0.0083	0.0042	-0.00266			-0.823	0.0213	-0.7126	0.0252	-0.8429	0.0202	-0.7514	0.0205	-0.0743
	VAL-170	-0.7732	0.005	-0.7879	0.0057	-0.781	0.006	-0.7236	0.0067	-0.6679	0.0054	-0.74672			0.0102	0.0202	0.0293	0.0224	-0.0467	0.0178	-0.0623	0.0213	0.0787	0.0174	0.00184			0.0031	0.0045	-0.013	0.0068	0.0026	0.006	0.0028	0.0054	-0.0033	0.009	-0.00156			-0.7599	0.0221	-0.7714	0.0238	-0.8252	0.0203	-0.7835	0.0216	-0.5922
	SER-171	-0.1551	0.0201	-0.2939	0.0137	-0.2992	0.0123	-0.2532	0.0147	-0.1521	0.0171	-0.2307			-0.0901	0.0263	0.0124	0.0259	-0.0685	0.0229	-0.1009	0.0214	-0.0012	0.0311	-0.04966			0.0043	0.0042	-0.0012	0.0039	-0.0029	0.005	-0.0032	0.0032	0.0043	0.0059	0.00026			-0.2399	0.0348	-0.2834	0.0286	-0.3711	0.0247	-0.3573	0.0262	-0.1489
	TYR-172	0.2948	0.0147	0.3833	0.0135	0.3442	0.0141	0.3123	0.0128	0.1263	0.0126	0.29218			-0.2372	0.0411	-0.0378	0.0451	-0.3948	0.0321	-0.322	0.0325	-0.0343	0.0471	-0.20522			-0.0046	0.0063	-0.0024	0.0056	0.0098	0.0064	-0.0056	0.0051	-0.0044	0.0074	-0.00144			0.054	0.0447	0.3435	0.0467	-0.0404	0.0355	-0.0146	0.0316	0.0892
	THR-173	0.3543	0.0154	0.3218	0.0165	0.351	0.0173	0.3282	0.0185	0.1974	0.0198	0.31054			-0.0972	0.0255	-0.034	0.0295	-0.1132	0.0252	-0.1267	0.0255	0.0224	0.0331	-0.06974			-0.0075	0.0047	0.0001	0.0049	0.0035	0.0049	-0.0132	0.0058	-0.0136	0.0062	-0.00614			0.2505	0.0299	0.2886	0.0346	0.2413	0.0319	0.1884	0.0314	0.2074
	HIS-174	-0.0921	0.0498	-0.3414	0.0342	-0.4023	0.0324	-0.451	0.0314	0.4368	0.0447	-0.17			-0.2078	0.0405	-0.0476	0.0391	-0.0753	0.0354	-0.1554	0.0346	-0.0744	0.0411	-0.1121			0.0131	0.0073	0.0119	0.0075	0.0109	0.0072	0.0104	0.0061	-0.0144	0.0082	0.00638			-0.2878	0.0582	-0.3807	0.0504	-0.4681	0.0487	-0.5948	0.046	0.3483
	PHE-175	0.3409	0.0096	0.3674	0.0097	0.3671	0.0093	0.453	0.0086	0.2923	0.0086	0.36414			-0.0358	0.0062	-0.0199	0.0074	-0.0496	0.0071	-0.0542	0.0082	-0.0116	0.011	-0.03422			0.0149	0.0091	0.0032	0.0082	-0.0044	0.0077	0.0011	0.0051	0.0117	0.0046	0.0053			0.32	0.0149	0.3504	0.0136	0.3129	0.0122	0.3992	0.0128	0.293
	ARG-176	-38.1285	0.1125	-38.0654	0.0959	-38.0567	0.0908	-38.8162	0.0828	-36.4744	0.1061	-37.9082			-0.0817	0.0451	0.1816	0.0526	-0.1841	0.0432	-0.1518	0.0494	0.1475	0.0531	-0.0177			0.0055	0.0063	0.0041	0.0058	-0.0059	0.0069	-0.016	0.0063	0.0089	0.0068	-0.00068			-38.2099	0.1138	-37.8805	0.0967	-38.2428	0.0984	-38.9884	0.0928	-36.3206
	ARG-177	-44.9914	0.2303	-46.7306	0.215	-45.7225	0.2227	-48.9749	0.188	-48.5677	0.2367	-46.9974			-0.0775	0.0584	0.5679	0.0627	-0.2096	0.0517	0.2352	0.0565	0.5173	0.0601	0.20666			-0.0105	0.0051	-0.0047	0.006	-0.0145	0.0067	-0.0094	0.0067	-0.0024	0.0086	-0.0083			-45.0864	0.2295	-46.167	0.194	-45.9436	0.2199	-48.7573	0.1705	-48.0626
	LEU-178	0.12	0.0097	0.0971	0.0105	0.2349	0.0128	0.2451	0.0085	0.1115	0.0087	0.16172			-0.0132	0.0059	0.0005	0.0042	0.0119	0.0067	0.0024	0.0033	0.0303	0.0054	0.00638			0.041	0.012	0.0287	0.0104	0.0139	0.0107	-0.0096	0.0073	-0.0091	0.0095	0.01298			0.1483	0.0146	0.1259	0.0151	0.2599	0.0162	0.2378	0.0113	0.133
	CYS-179	-0.5675	0.0159	-0.3393	0.0129	-0.4336	0.013	-0.6704	0.0114	-0.4486	0.0169	-0.49188			-0.0217	0.0186	0.0321	0.0222	-0.1147	0.0185	-0.1006	0.0201	0.062	0.0191	-0.02858			0.0044	0.0087	-0.016	0.0085	-0.0109	0.0079	-0.0202	0.0053	-0.0154	0.0062	-0.01162			-0.5846	0.0252	-0.3221	0.0271	-0.5589	0.0242	-0.791	0.0238	-0.4007
	SER-180	-0.3836	0.0143	-0.3725	0.0138	-0.5476	0.0189	-0.2926	0.0154	-0.4352	0.0163	-0.4063			-0.063	0.0227	0.0368	0.0249	-0.0366	0.0221	-0.0829	0.018	0.0743	0.0206	-0.01428			0.0037	0.0035	0.0252	0.0071	-0.0451	0.0095	-0.0022	0.0081	-0.003	0.0078	-0.00428			-0.4412	0.025	-0.3103	0.028	-0.6308	0.0276	-0.3775	0.025	-0.3636
	ARG-181	-38.1816	0.1229	-38.6414	0.1118	-39.0884	0.1703	-41.0498	0.1158	-36.8608	0.1635	-38.7644			-0.0292	0.0601	0.1486	0.065	-0.1616	0.0668	-0.1306	0.0617	-0.2309	0.075	-0.08074			-0.0204	0.0075	-0.0104	0.0092	-0.0132	0.0092	-0.0158	0.0055	0.0022	0.0074	-0.01152			-38.2336	0.1106	-38.5029	0.1075	-39.2602	0.1577	-41.1917	0.111	-37.0871
	ALA-182	0.1153	0.0092	0.1365	0.009	0.1723	0.0081	0.0766	0.0086	0.1503	0.0063	0.1302			-0.0363	0.0091	-0.0251	0.0094	-0.0457	0.0071	-0.0891	0.0089	-0.0163	0.0079	-0.0425			0.023	0.0126	0.0107	0.0108	-0.0115	0.0088	-0.0127	0.0078	0.0045	0.0087	0.0028			0.1017	0.0178	0.1223	0.0174	0.1152	0.0152	-0.0255	0.0159	0.1384
	LEU-183	0.1624	0.0141	0.1287	0.0103	0.1237	0.0092	0.3215	0.0074	0.2036	0.0058	0.18798			-0.0965	0.0274	0.02	0.0299	-0.1597	0.0251	-0.1073	0.0213	0.0248	0.0236	-0.06374			-0.001	0.0069	0.0125	0.0067	-0.0106	0.0082	-0.0171	0.0063	-0.0173	0.0079	-0.0067			0.0648	0.0313	0.162	0.0319	-0.0457	0.0282	0.1968	0.0235	0.2111
	GLY-184	-0.4112	0.0164	-0.5449	0.0098	-0.5425	0.0076	-0.2044	0.0072	-0.1176	0.0065	-0.36412			-0.0923	0.0203	0.0495	0.0229	-0.0861	0.0201	0.0092	0.0061	0.0207	0.005	-0.0198			0.01	0.0054	0.0106	0.0058	0.0007	0.0047	-0.0016	0.0049	0.0101	0.0066	0.00596			-0.4942	0.0259	-0.4853	0.0244	-0.6284	0.0238	-0.1966	0.0104	-0.0866
	GLY-185	-0.4174	0.0142	-0.5331	0.0129	-0.5206	0.0118	-0.162	0.011	0.1866	0.0168	-0.2893			-0.0481	0.0199	-0.0287	0.0231	-0.0546	0.0192	0.0349	0.0064	0.0002	0.0109	-0.01926			0.0166	0.0068	0.0033	0.0049	-0.0036	0.0059	-0.0185	0.008	-0.0133	0.0082	-0.0031			-0.4494	0.0235	-0.5578	0.0261	-0.5787	0.0231	-0.1458	0.0139	0.173
	LYS-186	-41.4728	0.1395	-42.6266	0.1655	-42.7109	0.172	-42.506	0.1258	-39.1526	0.1043	-41.6938			-0.6642	0.1097	-0.1968	0.1269	-0.6116	0.1002	-0.4762	0.1	0.1865	0.126	-0.35246			-0.0129	0.0099	-0.0111	0.0086	-0.0082	0.0092	0.0006	0.0051	0.0021	0.0078	-0.0059			-42.1586	0.1835	-42.8286	0.2064	-43.3308	0.2007	-42.9822	0.1622	-38.9667
	ALA-187	0.864	0.0069	0.9577	0.0081	0.9566	0.0068	0.5911	0.0077	0.4797	0.0117	0.76982			-0.1408	0.0186	-0.1163	0.0238	-0.2085	0.0217	-0.1083	0.0138	-0.0973	0.0116	-0.13424			-0.009	0.0048	0.0005	0.0032	0.0006	0.0028	0.0034	0.0036	-0.0009	0.0026	-0.00108			0.714	0.0211	0.8414	0.0245	0.7491	0.0227	0.4863	0.0155	0.3811
	LYS-188	-45.5165	0.1592	-47.568	0.1914	-47.0768	0.1323	-51.1996	0.1785	-48.2132	0.2381	-47.9148			-0.4398	0.1158	0.0966	0.123	-0.6719	0.1057	-0.5044	0.0996	0.7897	0.132	-0.14596			-0.0253	0.0083	-0.0052	0.0075	-0.0052	0.0069	0.0027	0.0051	0.0115	0.0097	-0.0043			-45.9815	0.1915	-47.4694	0.2144	-47.7497	0.1667	-51.6965	0.18	-47.3943
	SER-189	1.0808	0.0269	1.2762	0.0343	1.373	0.0301	1.4078	0.0325	1.1697	0.0166	1.2615			-0.3413	0.0331	-0.3775	0.0381	-0.4032	0.0343	-0.6164	0.0406	-0.3321	0.0384	-0.4141			-0.0251	0.0111	-0.0212	0.0092	-0.0285	0.0085	0.011	0.0051	0.0007	0.0057	-0.01262			0.7126	0.041	0.8794	0.047	0.9413	0.0409	0.8049	0.0481	0.8365
	GLU-190	48.8038	0.1369	51.2422	0.1389	50.7665	0.1902	50.6908	0.1128	46.9671	0.1508	49.6941			-1.0926	0.0789	-1.5755	0.0698	-0.8962	0.076	-1.0182	0.0651	-1.0125	0.1051	-1.119			0.0142	0.0083	-0.0031	0.0093	-0.0045	0.0101	0.0096	0.0051	-0.0055	0.0052	0.00214			47.725	0.133	49.6669	0.1423	49.8679	0.1915	49.6858	0.1224	45.9473
	LEU-191	1.109	0.0084	1.2163	0.0095	1.195	0.0109	1.1394	0.0089	1.1932	0.01	1.17058			-0.2027	0.0051	-0.334	0.0065	-0.2165	0.0061	-0.2063	0.0067	-0.3575	0.0075	-0.2634			0.0049	0.0102	0.006	0.0102	0.0118	0.0105	-0.0304	0.0093	-0.0251	0.0106	-0.00656			0.9114	0.0122	0.8879	0.0133	0.9904	0.0138	0.902	0.0128	0.8094
	ARG-192	-58.7641	0.2169	-64.4677	0.2307	-63.209	0.2115	-66.1427	0.2633	-59.6839	0.2167	-62.4535			2.0742	0.091	3.8923	0.111	2.6312	0.0821	3.4488	0.09	3.0801	0.1078	3.02532			-0.021	0.0113	0	0.0106	-0.0065	0.0091	0.0084	0.0095	0.0037	0.0123	-0.00308			-56.7145	0.1547	-60.5725	0.1514	-60.583	0.1705	-62.6834	0.1925	-56.5998
	ASN-193	2.3918	0.0814	3.2124	0.0819	3.0225	0.0635	0.7773	0.0765	2.892	0.0931	2.4592			-0.9146	0.0475	-1.2705	0.0586	-1.0444	0.049	-0.9603	0.0553	-1.1704	0.0544	-1.07204			-0.0138	0.0092	0.0048	0.0079	-0.0008	0.0085	0.0077	0.0085	0.0122	0.0112	0.00202			1.4638	0.0818	1.9471	0.0835	1.9775	0.075	-0.1745	0.0707	1.7306
	TRP-194	2.1537	0.0167	2.4112	0.0209	2.3667	0.0211	2.3254	0.0186	2.413	0.0194	2.334			-0.4451	0.0272	-0.6868	0.0253	-0.5029	0.026	-0.3567	0.0146	-0.7484	0.0257	-0.54798			0.0021	0.007	0.009	0.0065	0.0004	0.0065	-0.0016	0.0066	0.0028	0.0062	0.00254			1.7116	0.0275	1.7331	0.0281	1.8628	0.0294	1.9673	0.0153	1.6668
	ARG-195	-70.5196	0.219	-74.3633	0.2315	-72.8408	0.2581	-71.1518	0.1923	-69.3503	0.2039	-71.6452			3.8088	0.0863	6.1344	0.1077	3.7908	0.0997	2.8729	0.0744	6.0388	0.0781	4.52914			-0.0114	0.0074	0.02	0.0059	0.0076	0.0067	0.0047	0.0063	-0.0013	0.007	0.00392			-66.7278	0.198	-68.2036	0.1904	-69.0416	0.2108	-68.2719	0.1825	-63.3183
	MET-196	1.8097	0.0815	2.0155	0.1002	2.034	0.0878	1.462	0.0732	2.1004	0.0965	1.88432			-0.8085	0.0394	-1.0511	0.0537	-0.8728	0.0411	-0.6373	0.0329	-1.0727	0.0482	-0.88848			-0.0054	0.0086	0.0173	0.0098	-0.0004	0.0087	0.0047	0.008	0.0043	0.0098	0.0041			0.9963	0.0464	0.9831	0.0517	1.161	0.0517	0.8308	0.0443	1.0315
	ALA-197	0.8238	0.0257	1.1293	0.027	0.8907	0.0265	0.8516	0.026	1.0349	0.0331	0.94606			-0.2375	0.0209	-0.5868	0.0204	-0.2614	0.0187	-0.1589	0.0165	-0.7627	0.023	-0.40146			0.014	0.0067	0.0046	0.0052	-0.0078	0.0048	-0.0058	0.0034	0.0114	0.0074	0.00328			0.601	0.0147	0.547	0.0166	0.6228	0.0158	0.6857	0.0147	0.2822
	GLN-198	0.5962	0.0695	1.9612	0.0678	0.774	0.0759	0.6485	0.0674	2.283	0.0728	1.25258			-0.0086	0.0606	-0.4805	0.0471	-0.5405	0.041	-0.4705	0.0385	-1.0576	0.0323	-0.51154			0.0161	0.0079	-0.0228	0.0098	-0.002	0.0081	0.0044	0.009	0.0011	0.0059	-0.00064			0.6076	0.0829	1.4582	0.0573	0.2332	0.0809	0.1795	0.0729	1.2236
	SER-199	1.5443	0.0497	1.9435	0.0613	1.5675	0.0527	1.532	0.046	1.9539	0.0593	1.70824			-0.8165	0.0355	-1.2477	0.0411	-0.8723	0.0386	-0.8458	0.0323	-1.5079	0.0394	-1.05804			-0.0336	0.0065	-0.0239	0.0079	0.0152	0.0089	0.0111	0.0064	0.0308	0.0101	-8e-05			0.697	0.0249	0.6747	0.0339	0.7105	0.027	0.6966	0.0232	0.478
	LEU-200	1.9221	0.0361	2.1727	0.0399	1.8247	0.0379	1.5822	0.0346	1.6057	0.0408	1.82148			-1.1017	0.0276	-1.5078	0.0335	-1.0533	0.0274	-0.843	0.0229	-1.3699	0.0296	-1.17514			0.017	0.0108	0.0178	0.0113	0.0125	0.007	-0.0361	0.0088	-0.0016	0.0121	0.00192			0.84	0.0213	0.6811	0.0227	0.7819	0.0202	0.7031	0.0182	0.2356
	LEU-201	-1.5053	0.0441	-0.9504	0.0567	-1.5086	0.0437	-1.0786	0.0464	-1.3603	0.049	-1.28064			0.8037	0.0403	0.2585	0.0466	0.62	0.0361	0.5755	0.0359	0.0337	0.0442	0.45828			-0.0248	0.0113	0.0101	0.0085	0.0472	0.0138	-0.0198	0.0084	0.0573	0.0181	0.014			-0.7262	0.0274	-0.6826	0.0292	-0.8427	0.0266	-0.5233	0.0225	-1.2697
	ASN-202	-4.0634	0.0882	-2.0023	0.2074	-3.96	0.0931	-3.0497	0.0805	-2.698	0.0866	-3.15468			2.4665	0.0916	0.4166	0.1074	1.7757	0.0953	2.0215	0.0915	0.7769	0.0837	1.49144			-0.0022	0.0074	-0.0511	0.0117	-0.0113	0.0052	-0.0025	0.0049	-0.0003	0.0084	-0.01348			-1.6042	0.0835	-1.6357	0.1367	-2.1989	0.0655	-1.0308	0.0697	-1.9238
	SER-203	2.6456	0.116	3.2764	0.1696	1.2893	0.1129	2.0543	0.1126	-1.3304	0.1375	1.58704			-2.0926	0.1127	-3.8161	0.1213	-1.3334	0.1164	-1.9159	0.1063	-1.2615	0.1157	-2.0839			-0.0439	0.0093	-0.0006	0.0061	0.0036	0.0067	-0.0119	0.0075	-0.0132	0.0067	-0.0132			0.5109	0.0515	-0.5383	0.0866	-0.0431	0.051	0.1264	0.0501	-2.6059
	VAL-204	-2.2795	0.0802	-2.4426	0.0871	-3.1227	0.0678	-3.1406	0.0671	-5.1056	0.0962	-3.2182			0.3402	0.0506	0.6946	0.0614	0.8398	0.0482	0.982	0.0444	2.9952	0.1102	1.17036			-0.0233	0.0089	-0.0052	0.0098	0.0041	0.0074	-0.0002	0.0062	-0.2169	0.0141	-0.0483			-1.9647	0.0531	-1.7555	0.0436	-2.2802	0.0468	-2.1566	0.0414	-2.3257
	GLU-205	37.6138	0.8751	57.1517	1.0551	54.0219	0.957	61.4267	0.8978	52.4374	0.8585	52.5303			36.4903	1.1922	12.757	1.4139	15.4323	1.0389	10.8973	1.1492	14.1686	1.2156	17.9491			-1.1053	0.0191	-0.8585	0.026	-1.0482	0.0203	-0.9503	0.0217	-1.4034	0.0239	-1.07314			73.0531	0.6544	69.0545	0.7067	68.4454	0.6673	71.4188	0.5904	65.234
	GLY-206	-3.3736	0.1817	-0.2595	0.1567	-5.4924	0.2036	-4.5103	0.1905	-2.5113	0.1134	-3.22942			3.5366	0.209	-0.3265	0.2058	5.7408	0.2068	4.7363	0.2025	-0.9993	0.1076	2.53758			-0.5524	0.0127	-0.4094	0.0145	-0.7204	0.0136	-0.6709	0.0151	-0.4324	0.0115	-0.5571			-0.3909	0.1005	-0.9913	0.0982	-0.4698	0.1076	-0.4435	0.1099	-3.94
	HIS-207	-19.648	0.4402	-15.6362	0.657	-23.6215	0.4374	-23.0418	0.3801	-33.6203	0.6898	-23.1136			21.3978	0.5498	18.5388	0.8668	25.6128	0.5377	23.5897	0.4588	40.2147	0.8725	25.8708			-1.6966	0.0199	-1.7706	0.0242	-1.7016	0.02	-1.6527	0.0187	-2.7841	0.0368	-1.92112			0.0317	0.2544	1.1487	0.2921	0.3075	0.234	-1.1135	0.2894	3.8348
	GLU-208	77.1614	0.492	93.6217	0.6468	80.6685	0.5735	81.9009	0.45	81.526	0.611	82.9757			-3.7105	0.4812	-15.2119	0.5437	-3.7719	0.4838	-6.0411	0.3696	-13.0932	0.4189	-8.36572			-0.021	0.0078	-0.0096	0.008	-0.049	0.0079	0.0026	0.0062	-0.0103	0.008	-0.01746			73.4233	0.3109	78.4086	0.3659	76.8661	0.3271	75.8668	0.3335	68.444
	ASN-209	-54.1418	0.6111	-48.2336	0.4343	-55.0308	0.3973	-57.1151	0.3791	-49.2597	0.2907	-52.7562			55.3437	0.6982	45.8437	0.6045	55.1081	0.4775	57.9191	0.4298	48.3995	0.2883	52.5228			-1.2684	0.0167	-1.0974	0.0174	-1.3046	0.015	-1.3629	0.014	-1.3498	0.0163	-1.27662			-0.0764	0.2344	-3.495	0.3139	-1.2298	0.2543	-0.5665	0.2501	-2.2217
	ILE-210	-25.8928	0.1881	-28.5115	0.1936	-25.7657	0.2006	-26.4822	0.171	-20.2727	0.2764	-25.385			19.1188	0.1199	20.7963	0.1197	19.2284	0.1201	18.8076	0.1094	13.8437	0.1918	18.359			-0.0951	0.012	-0.331	0.0151	-0.1006	0.0109	-0.0821	0.0123	-0.2579	0.014	-0.17334			-6.8588	0.1441	-8.0377	0.1587	-6.6244	0.1642	-7.7566	0.1423	-6.704
	THR-211	-31.2606	0.5159	-32.9425	0.4537	-32.92	0.2633	-31.6849	0.3739	-34.5881	0.3921	-32.6792			23.4334	0.3941	25.8318	0.3609	24.8886	0.2018	23.6606	0.3	29.2236	0.2989	25.4076			-0.3801	0.0108	-0.3877	0.0112	-0.4244	0.0128	-0.4808	0.0128	-0.5844	0.0122	-0.45148			-8.2153	0.1903	-7.4946	0.2041	-8.4478	0.1679	-8.4846	0.1564	-5.9377
	GLN-212	-8.1167	0.3218	-9.0008	0.3394	-8.6914	0.2849	-9.5203	0.3022	-14.3569	0.9495	-9.93722			5.1856	0.2733	6.183	0.2728	5.1825	0.1959	5.5715	0.2201	13.2719	0.8341	7.0789			-0.0641	0.0099	-0.0198	0.0068	-0.007	0.0045	-0.0254	0.0072	-0.2524	0.0181	-0.07374			-3.0016	0.1844	-2.855	0.1744	-3.5323	0.148	-3.9905	0.1864	-1.3232
	LEU-213	-6.2012	0.0418	-7.2101	0.0527	-6.3321	0.0456	-6.3674	0.04	-7.5721	0.067	-6.73658			3.9967	0.0376	4.9166	0.0452	3.9988	0.0336	3.9934	0.0336	5.4826	0.0526	4.47762			-0.0161	0.0066	0.0061	0.009	0.0182	0.0089	0.0097	0.0062	0.0104	0.0108	0.00566			-2.2202	0.021	-2.289	0.0212	-2.313	0.0211	-2.3648	0.0208	-2.082
	ALA-214	-5.3263	0.028	-6.1237	0.0311	-5.4427	0.0283	-5.4441	0.0245	-6.2388	0.0401	-5.71512			3.2879	0.0254	3.9179	0.0278	3.3126	0.0205	3.3301	0.022	4.1928	0.0392	3.60826			-0.0023	0.0052	0.0105	0.0042	0.0046	0.0043	0.0082	0.004	0.0018	0.0038	0.00456			-2.0391	0.0138	-2.1943	0.013	-2.1263	0.0153	-2.106	0.0138	-2.0428
	VAL-215	-3.4741	0.0244	-4.2103	0.0256	-3.6832	0.0241	-3.5823	0.0242	-4.6012	0.0295	-3.91022			1.9332	0.0256	2.4772	0.0274	2.0101	0.0214	1.992	0.0214	2.7718	0.0335	2.23686			0.0121	0.0057	0.0079	0.0054	-0.0029	0.0056	-0.0105	0.0057	0.0033	0.0059	0.00198			-1.5292	0.0168	-1.7255	0.0168	-1.6761	0.0163	-1.6017	0.0161	-1.8272
	ASN-216	-2.939	0.0535	-3.5418	0.1209	-3.2163	0.0858	-3.2499	0.1005	-3.9902	0.0844	-3.38744			0.6703	0.0527	1.2893	0.1171	0.8661	0.0688	0.9551	0.0786	1.3876	0.0859	1.03368			-0.0016	0.0085	0.0019	0.0093	0.009	0.0086	-0.0049	0.0085	0.0062	0.0077	0.00212			-2.2673	0.0508	-2.2504	0.0801	-2.3432	0.06	-2.2993	0.0647	-2.5957
	HIS-217	-4.9603	0.0589	-5.9239	0.0728	-5.1336	0.0614	-4.7105	0.0565	-6.1011	0.0664	-5.36588			2.397	0.045	3.1561	0.0559	2.3543	0.0427	2.013	0.0406	3.441	0.0585	2.67228			-0.0282	0.0101	-0.0029	0.0102	-0.0251	0.0088	-0.0008	0.0077	-0.0079	0.0067	-0.01298			-2.592	0.0352	-2.7752	0.041	-2.8061	0.0361	-2.696	0.0398	-2.6667
	GLY-218	-1.7923	0.0242	-2.1121	0.0275	-1.7517	0.0254	-1.8026	0.0238	-2.2098	0.027	-1.9337			0.7394	0.0216	1.0586	0.0252	0.6739	0.0203	0.7168	0.0216	1.1656	0.0282	0.87086			-0.0045	0.0017	-0.0002	0.0031	-0.0001	0.0014	0.0058	0.0026	0	0.0032	0.0002			-1.0564	0.0241	-1.0543	0.029	-1.0786	0.0244	-1.08	0.0231	-1.0453
	TYR-219	-0.0793	0.0504	0.052	0.0541	-0.0238	0.0506	-0.1415	0.0552	0.2846	0.0542	0.0184			-0.0592	0.04	0.021	0.0482	-0.2362	0.0354	-0.1651	0.0358	0.0948	0.0509	-0.06894			-0.0062	0.0054	0.0046	0.0055	0.0016	0.0034	-0.0017	0.0035	0.0034	0.0062	0.00034			-0.1448	0.0377	0.0733	0.0457	-0.2586	0.0365	-0.3087	0.0382	0.3831
	SER-220	1.8581	0.0732	1.8989	0.0795	1.7332	0.0701	1.3309	0.0765	2.293	0.0791	1.82282			-0.5431	0.0658	-0.1815	0.0748	-0.5202	0.0574	-0.4689	0.0609	-0.1957	0.0635	-0.38188			0.0005	0.0022	-0.0035	0.0025	-0.0049	0.0018	0.002	0.0016	0.0015	0.0024	-0.00088			1.3159	0.0753	1.7124	0.0816	1.2034	0.0643	0.8651	0.0732	2.104
	SER-221	1.7677	0.0631	2.1776	0.0743	1.7978	0.0582	1.4455	0.0603	1.7136	0.0671	1.78044			-1.2706	0.0458	-1.4348	0.0639	-1.1973	0.0474	-0.9172	0.0512	-1.1615	0.0559	-1.19628			-0.0015	0.0055	-0.0086	0.0046	0.0136	0.005	-0.0012	0.0022	-0.0044	0.0048	-0.00042			0.4951	0.0589	0.7344	0.0662	0.6145	0.0525	0.5271	0.0496	0.544
	PRO-222	-0.2279	0.0796	0.0279	0.0838	-0.1833	0.0811	-0.3672	0.0841	0.1429	0.0671	-0.12152			-1.4927	0.0413	-1.8102	0.0531	-1.4256	0.0437	-1.3206	0.0439	-1.4454	0.0396	-1.4989			-0.0052	0.0043	0.0026	0.0052	0.0065	0.0037	0.0088	0.0039	-0.009	0.0065	0.00074			-1.7259	0.0547	-1.7794	0.0543	-1.6004	0.0501	-1.6797	0.0574	-1.3113
	SER-223	0.825	0.21	0.6632	0.2236	0.6198	0.1977	0.6196	0.1605	0.2052	0.1592	0.58656			-1.7403	0.0828	-1.5952	0.1034	-1.5145	0.0761	-1.5249	0.0695	-1.0002	0.0837	-1.47502			0.0051	0.003	-0.0051	0.0032	0.0014	0.0025	-0.0006	0.0023	0.003	0.004	0.00076			-0.9104	0.1967	-0.9424	0.1885	-0.8925	0.1784	-0.9182	0.1565	-0.7937
	HIS-224	2.1214	0.1136	1.8763	0.0849	2.392	0.1247	3.2536	0.1417	1.7411	0.0885	2.27688			-1.3035	0.0776	-1.1183	0.0743	-1.2391	0.0663	-1.9802	0.0517	-0.8476	0.0797	-1.29774			0.0055	0.0058	-0.0051	0.0053	0.0019	0.007	-0.002	0.0044	0.002	0.0053	0.00046			0.821	0.0915	0.7549	0.068	1.152	0.1023	1.2676	0.1314	0.8943
	PHE-225	-2.9858	0.0492	-3.1434	0.0567	-3.0788	0.0433	-3.0239	0.0467	-3.0655	0.0485	-3.05948			1.0427	0.0282	1.1798	0.0354	1.178	0.0235	1.2208	0.0299	1.1981	0.0332	1.16388			-0.0099	0.0061	0.0219	0.0057	0.0073	0.0055	0.0032	0.0047	0.0192	0.0063	0.00834			-1.9531	0.0271	-1.9403	0.0314	-1.892	0.0281	-1.7991	0.0274	-1.8482
	SER-226	-4.266	0.2317	-6.9555	0.2297	-5.4916	0.2397	-6.8069	0.2081	-5.2301	0.207	-5.75002			1.2306	0.1776	3.6482	0.2293	1.9972	0.2072	3.371	0.1884	1.4546	0.1454	2.34032			-0.0837	0.0078	-0.1794	0.0117	-0.0799	0.0078	-0.0919	0.0086	-0.0153	0.0058	-0.09004			-3.1161	0.1265	-3.4933	0.1229	-3.564	0.1203	-3.5313	0.1228	-3.7958
	SER-227	-1.0931	0.1354	-0.7454	0.1726	-0.9462	0.1587	-0.5652	0.1188	-1.097	0.112	-0.88938			0.003	0.0623	-0.0959	0.0901	0.0751	0.0581	0.2683	0.0565	0.235	0.0605	0.0971			-0.0025	0.0064	0.0012	0.0066	-0.0007	0.0059	-0.0005	0.0055	-0.0043	0.0062	-0.00136			-1.0858	0.1006	-0.8467	0.1216	-0.8673	0.1268	-0.2997	0.0957	-0.8678
	GLU-228	69.5476	0.1918	74.8414	0.2067	73.3558	0.2744	74.4089	0.2426	69.4516	0.1971	72.3211			-5.8576	0.1179	-7.4104	0.1237	-5.4855	0.098	-6.0512	0.1054	-6.8176	0.1443	-6.32446			-0.0015	0.0051	-0.0052	0.0059	-0.0084	0.0051	-0.0022	0.0051	0.0016	0.0044	-0.00314			63.7033	0.1813	67.4268	0.188	67.8708	0.2367	68.3552	0.2277	62.6421
	ILE-229	-3.7745	0.0351	-4.2594	0.0472	-3.9731	0.0316	-3.8739	0.0372	-3.9715	0.0395	-3.97048			1.379	0.0271	1.612	0.0356	1.2525	0.0198	1.3074	0.024	1.5432	0.028	1.41882			-0.012	0.0119	-0.0095	0.0098	-0.0204	0.0107	-0.0106	0.0099	-0.0146	0.0108	-0.01342			-2.4088	0.0235	-2.6581	0.0231	-2.7412	0.0257	-2.5768	0.0271	-2.442
	LYS-230	-146.096	1.7387	-160.543	1.8851	-139.561	1.7174	-141.718	1.707	-119.847	1.5283	-141.553			44.7095	1.8283	57.558	2.2583	25.1812	1.1752	27.8399	1.3389	27.2376	1.1395	36.5052			-0.1413	0.0128	-0.2857	0.0187	-0.0568	0.0092	-0.1014	0.0116	-0.0454	0.0104	-0.12612			-101.556	0.6849	-103.2	0.8518	-114.401	0.9656	-113.967	0.9229	-92.6279
	GLU-231	68.813	0.3082	73.3515	0.3277	73.9931	0.409	75.3091	0.4108	65.7641	0.2584	71.4462			-3.5504	0.1474	-3.8759	0.1335	-3.6891	0.1244	-3.597	0.13	-3.0452	0.1357	-3.55152			-0.0004	0.0061	-0.0046	0.005	0.0031	0.0057	0.0018	0.0051	-0.0011	0.0063	-0.00024			65.2367	0.2616	69.4762	0.3068	70.2915	0.3722	71.7163	0.367	62.7326
	LEU-232	-2.7303	0.022	-3.0814	0.0269	-2.7994	0.0227	-2.8488	0.0212	-2.8661	0.0197	-2.8652			1.0785	0.0248	1.4415	0.0301	0.9558	0.0236	0.9319	0.0239	1.314	0.0193	1.14434			0.0022	0.0101	0.003	0.0091	0.0068	0.008	0.0115	0.0081	0.001	0.0107	0.0049			-1.6496	0.0237	-1.6362	0.0286	-1.8375	0.0231	-1.9057	0.024	-1.5519
	ILE-233	-2.3931	0.0307	-2.6532	0.0381	-2.5965	0.0301	-2.5399	0.0299	-2.6898	0.0399	-2.5745			0.8546	0.0237	1.1148	0.0283	0.7696	0.0201	0.7608	0.0215	1.0733	0.0258	0.91462			0.0483	0.0133	0.0427	0.0144	0.0328	0.0135	0.019	0.0097	-0.0274	0.0123	0.02308			-1.4911	0.0278	-1.4978	0.0276	-1.793	0.0244	-1.7602	0.0232	-1.6445
	GLY-234	1.8166	0.0575	1.9097	0.0752	1.691	0.0603	1.485	0.0612	1.0602	0.0671	1.5925			-0.2811	0.04	-0.3083	0.06	-0.1886	0.0374	-0.0767	0.0333	-0.1886	0.0383	-0.20866			-0.0042	0.0033	-0.0081	0.004	-0.0021	0.0039	0.0023	0.0038	0.0007	0.0047	-0.00228			1.5264	0.0314	1.5931	0.0418	1.4999	0.0352	1.4114	0.0412	0.8715
	VAL-235	-0.5751	0.0529	-0.9986	0.0806	0.2257	0.0474	0.2866	0.0519	0.4967	0.0593	-0.11294			0.4114	0.0306	0.5769	0.054	0.2631	0.023	0.236	0.0282	-0.0863	0.0421	0.28022			0.0022	0.0074	-0.0013	0.009	0.0044	0.0055	0.0062	0.0052	-0.0161	0.0113	-0.00092			-0.1633	0.0352	-0.4208	0.0417	0.4938	0.0369	0.5274	0.0364	0.3965
	SER-236	-14.8975	0.2641	-16.7853	0.2204	-15.1695	0.2411	-15.7205	0.2148	-15.3469	0.231	-15.5839			12.8208	0.2848	14.4516	0.1932	13.1241	0.2397	13.4892	0.158	12.5518	0.1911	13.2875			-0.4928	0.014	-0.6425	0.0139	-0.4989	0.0112	-0.5404	0.0113	-0.5125	0.0118	-0.53742			-2.5476	0.1532	-2.9734	0.1664	-2.5489	0.1426	-2.7699	0.1621	-3.3087
	PRO-237	-7.0773	0.055	-7.4882	0.0657	-7.523	0.0484	-7.3645	0.045	-10.7944	0.2562	-8.04948			4.6163	0.0532	4.1554	0.0464	4.3623	0.0409	4.3461	0.0367	5.435	0.1267	4.58302			0.0057	0.0121	-0.0321	0.0112	-0.0099	0.0084	-0.018	0.0072	-0.0149	0.0116	-0.01384			-2.4543	0.0328	-3.3651	0.0378	-3.1699	0.0293	-3.039	0.0281	-5.367
	ARG-238	-240.619	1.1757	-201.325	1.0769	-237.849	1.054	-238.225	0.7205	-178.79	0.784	-219.362			164.658	1.2426	116.21	1.4252	161.155	0.9055	162.78	0.7825	94.9248	0.7575	139.946			-2.5561	0.0206	-1.7706	0.0243	-2.6823	0.0191	-2.5899	0.0213	-1.7117	0.0206	-2.26212			-78.603	0.4597	-86.8898	0.5934	-79.3439	0.6033	-78.0259	0.469	-85.5586
	LYS-239	-140.694	1.8418	-147.15	1.5134	-116.87	1.1843	-120.342	1.1696	-142.286	1.9587	-133.469			65.6963	2.7557	62.9897	2.1329	35.8042	1.2294	30.611	1.1817	74.0299	2.8158	53.8262			-0.7992	0.0325	-1.0144	0.0269	-0.4781	0.0192	-0.4785	0.0198	-0.9291	0.0344	-0.73986			-75.8486	1.0989	-85.2844	0.9718	-81.4947	0.5381	-90.1568	0.5462	-69.1602
	LEU-240	-9.2106	0.0504	-9.0939	0.0696	-9.3934	0.0609	-8.9966	0.0505	-10.6671	0.0942	-9.47232			5.551	0.0449	5.6737	0.0575	5.1454	0.0474	5.1962	0.0356	6.3529	0.0641	5.58384			-0.0098	0.0099	-0.0157	0.0108	-0.0278	0.0095	-0.0195	0.009	0.0166	0.0091	-0.01124			-3.6674	0.0279	-3.4366	0.0315	-4.2763	0.0281	-3.8199	0.0278	-4.2949
	SER-241	-12.7063	0.2897	-12.8816	0.2268	-17.8867	0.127	-16.9202	0.1723	-13.9521	0.1168	-14.8694			8.8	0.1911	10.4392	0.1974	11.315	0.1002	11.0198	0.1202	9.151	0.1261	10.145			-0.1801	0.0097	-0.094	0.0083	-0.2622	0.0082	-0.233	0.0068	-0.0445	0.0059	-0.16276			-4.0997	0.1661	-2.541	0.1794	-6.8406	0.1207	-6.1514	0.1237	-4.8388
	ASN-242	-29.6075	0.2051	-29.4022	0.2067	-29.0783	0.2527	-29.0104	0.2443	-29.5104	0.2697	-29.3218			27.8961	0.2378	29.4989	0.2366	28.7739	0.4103	27.381	0.4102	28.5789	0.3829	28.4258			-1.1417	0.017	-1.1683	0.0157	-1.2807	0.023	-1.2562	0.0271	-1.4434	0.0161	-1.25806			-2.8502	0.2288	-1.0786	0.2157	-1.5818	0.2651	-2.8965	0.2543	-2.3751
	ILE-243	-11.2836	0.0912	-10.6253	0.0884	-10.7229	0.0785	-10.3877	0.0784	-11.5259	0.0802	-10.9091			7.0702	0.0647	6.9847	0.061	6.2878	0.0653	6.1689	0.0632	7.7241	0.0644	6.84714			0.045	0.0121	0.0429	0.0115	-0.0208	0.0118	0.0241	0.0127	-0.0174	0.0166	0.01476			-4.1665	0.0437	-3.5963	0.0444	-4.4529	0.0381	-4.1982	0.0361	-3.8179
	ILE-244	-25.8484	0.1408	-25.9645	0.1677	-25.7611	0.1221	-25.6283	0.177	-26.9139	0.1349	-26.0232			16.5788	0.0867	16.1769	0.0982	15.6894	0.0913	15.6466	0.1199	16.5479	0.0758	16.1279			-0.8682	0.0182	-0.7721	0.017	-0.875	0.0176	-0.7782	0.0165	-0.9105	0.0189	-0.8408			-10.1306	0.1299	-10.5622	0.1305	-10.9457	0.1226	-10.7616	0.1302	-11.2776
	GLN-245	-49.7028	0.3556	-49.0947	0.2944	-50.1599	0.3069	-50.9326	0.3232	-56.1158	0.3723	-51.2012			56.0505	0.2551	56.4492	0.2374	54.498	0.2327	55.0422	0.2495	56.0978	0.2101	55.6275			-3.0439	0.0184	-3.1519	0.0181	-3.1406	0.0173	-3.2018	0.0175	-3.4763	0.0178	-3.2029			3.2986	0.3282	4.2174	0.3151	1.2091	0.3502	0.9161	0.2978	-3.503
	LEU-246	-21.6493	0.2853	-21.503	0.3437	-19.5193	0.2425	-19.4396	0.2702	-22.1449	0.2452	-20.8512			5.1559	0.2471	6.6618	0.2709	3.3609	0.2227	4.2796	0.2377	6.9078	0.1976	5.2732			-1.8128	0.0219	-1.691	0.0198	-1.7742	0.0227	-1.6569	0.0216	-1.6777	0.0212	-1.72252			-18.3016	0.1483	-16.5496	0.1734	-17.9408	0.1578	-16.8041	0.1524	-16.9219
	ALA-247	-17.2649	0.1802	-18.828	0.1643	-17.7473	0.1694	-17.9814	0.156	-18.778	0.1605	-18.1199			11.3808	0.126	12.5828	0.1179	11.6443	0.1281	12.0382	0.1425	11.9274	0.1041	11.9147			-0.2852	0.0103	-0.3403	0.0126	-0.3431	0.0116	-0.3133	0.015	-0.3164	0.0128	-0.31966			-6.1732	0.1176	-6.5906	0.1264	-6.4523	0.1162	-6.2607	0.1258	-7.1633
	ASP-248	-59.3341	1.0576	-50.5582	1.1431	-52.9931	1.1347	-50.6303	1.0835	-63.0728	1.117	-55.3177			90.3989	1.6086	78.5228	1.4277	75.4406	1.6286	74.2048	1.3839	101.357	1.5045	83.9848			-1.6401	0.0216	-1.5071	0.02	-1.5241	0.0212	-1.5212	0.0222	-2.0113	0.0262	-1.64076			29.463	0.899	26.4004	0.6134	20.879	0.7335	22.0358	0.6149	36.2123
	LYS-249	-98.1729	0.9528	-99.8755	0.7904	-102.089	0.7495	-104.039	0.9729	-101.919	0.8392	-101.219			143.273	0.6994	147.954	0.7251	147.737	0.7286	159.799	1.0125	152.791	0.8145	150.311			-2.0238	0.016	-1.9389	0.0186	-1.9828	0.0173	-1.9789	0.0185	-1.8506	0.0193	-1.955			43.104	0.6071	46.1454	0.6952	43.6851	0.6124	53.7579	0.6264	48.988
SicA	GLU-9	-17.6148	0.2782	-15.6969	0.3846	-7.2269	0.8376	-6.5307	0.4318	-17.7022	2.1682	-12.9543			4.9335	0.2519	5.2801	0.2467	0.5938	0.256	0.6384	0.2051	32.7002	2.4672	8.8292			-0.0023	0.009	0.0054	0.0081	-0.0083	0.0151	0.0294	0.0187	-0.3237	0.0256	-0.0599			-12.674	0.2878	-10.4072	0.3699	-6.6625	0.7456	-5.8666	0.4652	14.6165
	GLU-10	-91.0264	1.7125	-100.795	1.573	-50.5144	1.3829	-68.8037	1.5409	-53.0781	0.7157	-72.8436			25.9585	1.709	29.8997	1.5451	2.4229	0.1693	3.3554	0.4094	3.9846	0.3764	13.1242			-0.3568	0.0244	-0.5284	0.0317	0	0.0119	0.0188	0.0126	-0.0088	0.01	-0.17504			-65.4847	0.9342	-71.4244	0.8641	-48.0872	1.3146	-65.3999	1.2546	-49.0978
	ARG-11	76.0253	0.7171	76.0513	0.7571	34.263	0.4658	39.8269	0.439	38.9623	0.2741	53.0258			-1.4259	0.2014	-3.8062	0.3829	-1.4363	0.0785	-2.5868	0.0871	-1.767	0.0832	-2.20444			-0.0109	0.0093	-0.0102	0.0125	-0.015	0.0152	0.0095	0.0139	-0.0195	0.0137	-0.00922			74.5664	0.6503	72.2568	0.5529	32.837	0.4633	37.2466	0.4306	37.1832
	VAL-12	-1.4717	0.0545	-1.1769	0.0572	-1.3533	0.0562	-1.4712	0.0775	-1.083	0.0778	-1.31122			0.9715	0.0299	0.7024	0.035	1.0278	0.0279	0.9516	0.0431	0.5864	0.0419	0.84794			0.0133	0.0173	-0.0328	0.0216	0.0049	0.0126	-0.0178	0.0132	-0.0006	0.0117	-0.0066			-0.4843	0.0467	-0.5074	0.0396	-0.3214	0.0427	-0.5415	0.052	-0.5024
	ALA-13	-0.3459	0.0823	0.2185	0.1104	-0.7608	0.0879	-0.069	0.1194	-1.7821	0.144	-0.54786			0.7097	0.0733	-0.3234	0.0985	1.3677	0.079	0.9403	0.0927	0.7364	0.1367	0.68614			-0.0998	0.0129	-0.1348	0.0164	-0.1687	0.0159	-0.1759	0.0175	-0.647	0.017	-0.24524			0.2643	0.0509	-0.2403	0.0689	0.4441	0.0691	0.6956	0.0913	-1.6863
	GLU-14	-170.732	1.1977	-176.677	1.4511	-166.908	1.2207	-175.895	1.0483	-178.712	1.0848	-173.785			115.565	1.552	121.703	2.2246	112.307	1.5548	113.175	1.574	130.165	1.7461	118.583			-1.6121	0.021	-1.7184	0.0246	-1.7635	0.0244	-1.7548	0.0238	-2.1292	0.0217	-1.7956			-56.7797	0.8101	-56.6432	1.0743	-56.3154	0.8953	-64.5377	0.9706	-50.706
	MET-15	-1.5857	0.1636	-0.3194	0.1964	-3.248	0.1777	-2.4224	0.1962	-3.1793	0.1551	-2.15096			0.9275	0.0858	-0.1834	0.0928	2.093	0.1213	1.7178	0.1475	2.4694	0.0933	1.40486			0.0169	0.0169	0.037	0.019	-0.0235	0.0162	-0.0223	0.0175	-0.0301	0.0138	-0.0044			-0.6412	0.1248	-0.4671	0.1394	-1.19	0.1176	-0.7348	0.1458	-0.7459
	ILE-16	-0.8769	0.0525	0.4876	0.0629	-0.774	0.0554	-0.3249	0.0578	0.4758	0.0585	-0.20248			0.6245	0.0351	-0.241	0.0368	0.6759	0.0377	0.5094	0.0423	-0.4717	0.0453	0.21942			-0.023	0.0135	-0.0059	0.0109	-0.0052	0.0112	-0.0062	0.0137	-0.0214	0.0174	-0.01234			-0.2764	0.0383	0.238	0.039	-0.1011	0.0327	0.1767	0.0412	-0.0181
	TRP-17	-31.2847	0.3662	-28.2639	0.2558	-35.4631	0.2769	-34.8765	0.2973	-40.0231	0.2331	-33.9823			23.6133	0.2021	21.0125	0.1942	25.3741	0.1552	24.642	0.1953	23.6779	0.1711	23.664			-2.3435	0.0308	-2.2774	0.0206	-2.5248	0.0251	-2.5513	0.029	-2.3401	0.0205	-2.40742			-10.0285	0.2677	-9.5323	0.2041	-12.6224	0.2458	-12.7827	0.2125	-18.6953
	ASP-18	-156.856	1.0651	-133.894	0.9588	-152.95	0.879	-159.02	0.824	-137.004	0.7394	-147.945			91.7944	1.4706	65.9023	1.2228	89.9776	0.9441	95.515	0.8278	78.1652	0.8587	84.2709			-0.8842	0.0173	-0.8696	0.0231	-0.9419	0.0165	-0.902	0.0173	-0.9926	0.0166	-0.91806			-65.8861	0.67	-68.8096	0.8884	-63.9292	0.6746	-64.3893	0.5986	-59.8024
	ALA-19	-2.0732	0.0927	-0.3619	0.0613	-2.1919	0.0701	-1.0625	0.0642	-0.4664	0.058	-1.23118			1.9723	0.0816	0.9064	0.0471	2.165	0.064	1.4809	0.0596	0.1554	0.0496	1.336			-0.0054	0.0111	0.0334	0.0111	-0.0095	0.0118	0.0182	0.0121	-0.0238	0.012	0.00258			-0.1034	0.0384	0.5759	0.0363	-0.0349	0.0343	0.4338	0.034	-0.3321
	VAL-20	1.5378	0.0582	2.3139	0.0466	1.8515	0.0499	2.5836	0.0462	-0.9491	0.0968	1.46754			-1.1728	0.049	-1.0729	0.0374	-1.2707	0.05	-1.7355	0.0407	0.9149	0.1229	-0.8674			-0.0135	0.0058	0.0125	0.0068	0.0068	0.0055	-0.0092	0.0088	-0.1021	0.0148	-0.0211			0.3492	0.0339	1.2551	0.0365	0.589	0.0299	0.8387	0.0313	-0.1372
	SER-21	-10.9779	0.2103	0.1832	0.2674	-2.551	0.4482	1.5683	0.3518	-7.0443	0.2256	-3.76434			14.4202	0.2299	3.5639	0.3192	8.5395	0.4482	3.6729	0.4065	12.2597	0.2172	8.49124			-0.734	0.016	-0.7849	0.0191	-0.8564	0.0177	-0.7192	0.0175	-1.6701	0.0182	-0.95292			2.715	0.1207	2.9536	0.172	5.1336	0.2125	4.5104	0.2124	3.5328
	GLU-22	-175.906	0.7933	-167.294	0.9291	-174.114	0.8307	-174.795	0.8203	-143.361	1.2451	-167.094			173.426	0.8895	157.162	0.9429	173.435	0.7786	172.492	0.8525	107.846	1.4922	156.872			-2.5459	0.0178	-2.221	0.0196	-2.4592	0.017	-2.3598	0.0198	-1.7671	0.0262	-2.2706			-5.0199	0.6449	-12.3308	0.6258	-3.2022	0.6813	-4.6483	0.5738	-37.3095
	GLY-23	1.2501	0.0649	1.5395	0.05	1.2209	0.0582	1.6063	0.0597	0.7391	0.0446	1.27118			-0.3318	0.0484	-0.4438	0.0359	-0.286	0.0414	-0.6267	0.0451	-0.2496	0.0408	-0.38758			0.001	0.0054	-0.0001	0.0037	-0.0051	0.003	-0.0003	0.0035	-0.0078	0.004	-0.00246			0.9182	0.0458	1.0966	0.0366	0.9288	0.0324	0.9787	0.0337	0.4801
	ALA-24	-1.784	0.0578	-1.875	0.0458	-2.1516	0.0461	-2.0984	0.0487	-1.8134	0.0417	-1.94448			0.8038	0.0497	0.7926	0.046	0.9315	0.045	0.8988	0.0441	0.8397	0.0494	0.85328			0.008	0.0064	0.0137	0.0089	0.0033	0.0076	0.0087	0.0074	-0.0152	0.0073	0.0037			-0.9724	0.0351	-1.0687	0.036	-1.2193	0.0355	-1.1907	0.0369	-0.9912
	THR-25	-1.0644	0.0462	-0.9679	0.0406	-1.1529	0.0363	-1.2398	0.0385	0.1332	0.0324	-0.85836			-0.135	0.0347	-0.1137	0.0309	-0.1699	0.0272	-0.1804	0.0349	-0.4837	0.0419	-0.21654			-0.0038	0.0129	0.0193	0.0124	-0.0001	0.0126	-0.0097	0.0145	0.0019	0.0152	0.00152			-1.2011	0.0422	-1.0605	0.0397	-1.3207	0.0405	-1.428	0.0409	-0.348
	LEU-26	0.6897	0.0282	0.3931	0.0271	0.527	0.0267	0.6438	0.0257	0.6893	0.0252	0.58858			-0.4699	0.0129	-0.3528	0.0134	-0.4805	0.014	-0.4974	0.0123	-0.4493	0.0262	-0.44998			-0.0102	0.0176	0.0306	0.0192	-0.0165	0.0164	0.0021	0.0185	0.005	0.0173	0.0022			0.2088	0.0287	0.0709	0.029	0.0301	0.0259	0.1491	0.0299	0.245
	LYS-27	33.3009	0.2317	31.0021	0.2157	32.6957	0.2544	34.4424	0.2166	35.0334	0.291	33.2949			-1.5164	0.1479	-1.322	0.1557	-2.1446	0.1468	-2.1371	0.1496	-2.0857	0.1635	-1.84116			-0.0531	0.0202	-0.0168	0.0244	-0.0311	0.0162	0.0292	0.02	-0.0354	0.0151	-0.02144			31.7396	0.2483	29.6662	0.2424	30.5227	0.2744	32.337	0.2408	32.92
	ASP-28	-39.6342	0.2485	-43.6868	0.2731	-38.6346	0.3333	-41.1074	0.2507	-41.804	0.3459	-40.9734			2.7509	0.1493	2.9888	0.1225	1.9675	0.1314	2.074	0.1408	2.6836	0.1306	2.49296			0.0102	0.0087	0.0027	0.0097	0.0027	0.0095	-0.0108	0.0092	0.0002	0.0084	0.001			-36.8678	0.2677	-40.7092	0.2638	-36.6557	0.3447	-39.0476	0.2534	-39.1245
	VAL-29	0.0964	0.0239	-0.1372	0.0385	-0.6001	0.0225	-0.1402	0.0257	-0.1287	0.0287	-0.18196			0.1726	0.0277	0.2346	0.0295	0.2449	0.0283	0.1913	0.0243	0.3487	0.0271	0.23842			-0.013	0.0096	0.0007	0.0131	-0.0218	0.0162	-0.0104	0.0124	0.0091	0.0103	-0.00708			0.2585	0.0361	0.0977	0.0524	-0.3774	0.0379	0.0404	0.0338	0.2281
	HIS-30	2.5942	0.1209	-2.6327	0.1661	-2.0892	0.2065	1.6633	0.1228	1.0072	0.155	0.10856			0.5412	0.0647	0.9976	0.0762	0.7418	0.0701	0.3734	0.0602	0.7041	0.0704	0.67162			0.0212	0.0191	-0.0235	0.0162	0.009	0.0138	-0.0207	0.0197	0.021	0.0144	0.0014			3.1618	0.0942	-1.6559	0.1726	-1.3457	0.2022	2.0146	0.1118	1.7272
	GLY-31	0.2622	0.0348	-0.2377	0.0355	-0.5282	0.027	-0.0586	0.0345	-0.1073	0.0319	-0.13392			0.0427	0.0224	0.1045	0.0255	0.0209	0.0138	-0.023	0.0146	0.157	0.0154	0.06042			0.0163	0.0071	-0.0021	0.0099	0.0006	0.0064	0.0043	0.0057	0.0011	0.0092	0.00404			0.3195	0.0368	-0.1365	0.0358	-0.5061	0.0225	-0.0758	0.0308	0.0526
	ILE-32	-0.0154	0.0166	0.137	0.0163	0.1497	0.0156	0.137	0.0162	0.1174	0.0178	0.10514			-0.0099	0.0068	-0.0442	0.0081	-0.047	0.0075	-0.0581	0.0072	-0.0298	0.0094	-0.0378			0.0412	0.0131	-0.0487	0.016	0.0152	0.0136	-0.0333	0.0161	0.0028	0.0162	-0.00456			0.0161	0.0193	0.0453	0.0198	0.1178	0.0185	0.0446	0.0214	0.0899
	PRO-33	0.4178	0.0098	0.3187	0.0098	0.3288	0.0088	0.4331	0.0088	0.3625	0.0078	0.37218			0.0091	0.005	0.0312	0.0068	0.0347	0.0051	0.0087	0.0062	0.0181	0.0056	0.02036			0.0367	0.0157	-0.0282	0.0153	-0.0124	0.0158	-0.0102	0.0126	-0.0115	0.0102	-0.00512			0.4643	0.019	0.3211	0.0192	0.3509	0.0176	0.4317	0.014	0.3691
	GLN-34	0.3516	0.064	0.2112	0.0669	0.6251	0.0684	0.7474	0.0712	0.1409	0.0657	0.41524			0.7926	0.0819	0.9448	0.0743	0.4765	0.0906	0.2315	0.0885	0.4976	0.0773	0.5886			-0.0068	0.0151	0.0443	0.0159	-0.0144	0.0107	-0.0127	0.0157	-0.0182	0.0127	-0.00156			1.1417	0.0941	1.1986	0.0977	1.0822	0.1046	0.9597	0.107	0.6214
	ASP-35	-24.0059	0.1749	-24.9405	0.1758	-25.1449	0.1884	-25.9393	0.1761	-26.8422	0.1708	-25.3746			1.3136	0.1224	1.1992	0.1242	1.1233	0.13	0.9406	0.1194	1.2594	0.1316	1.16722			0.015	0.0092	-0.0065	0.0086	0.0034	0.008	-0.0008	0.0075	0.0027	0.0076	0.00276			-22.6849	0.203	-23.7414	0.2074	-24.0242	0.2077	-25.007	0.1916	-25.5808
	MET-36	0.5426	0.046	0.5553	0.05	0.3875	0.0337	0.0501	0.0291	0.0287	0.0211	0.31284			0.0538	0.0206	0.0534	0.0254	0.042	0.0185	0.0279	0.0174	0.0985	0.0176	0.05512			0.0425	0.0171	-0.0192	0.0199	0.0161	0.0166	0.0202	0.0164	0.0318	0.0167	0.01828			0.6412	0.0504	0.5877	0.0552	0.4462	0.0379	0.0985	0.0334	0.1607
	MET-37	0.8019	0.0475	1.3785	0.0456	1.0112	0.0429	0.9028	0.0542	0.4658	0.033	0.91204			-0.1236	0.0161	-0.1671	0.0185	-0.1722	0.0164	-0.157	0.0198	-0.0315	0.0168	-0.13028			-0.0223	0.0183	-0.045	0.0212	-0.0199	0.0167	-0.0152	0.019	-0.0433	0.0151	-0.02914			0.654	0.0409	1.1682	0.0414	0.8201	0.038	0.7298	0.0494	0.3914
[truncated: 196 more rows]
[truncated: 2 more columns]
